# Supplementary material for: c-Maf controls immune responses by regulating disease-specific gene networks and repressing IL-2 in CD4+ T cells
Source: Springer Nature journal article supplement (doi:10.1038/s41590-018-0083-5), 2018-04-13
Supplement: MOESM3 [file 41590_2018_83_MOESM3_ESM%20-Supp_T_1.xlsx]

## Sheet: IL-10 correlating genes
Gene Symbol	Similarity
Il10	1
Hmox1	0.871774
Ccr5	0.853071
Il21	0.852166
Ptprj	0.841411
2010111I01Rik	0.839473
Ctnna1	0.831382
Ctla2a	0.828084
Maf	0.818385
Icos	0.814856
Id2	0.813539
Slc41a2	0.812317
Gja1	0.812019
Foxf2	0.809026
Car5b	0.807657
Insm1	0.806918
Lgals3	0.802265
Atf6	0.801719
Cxcr6	0.801694
Itga3	0.799049
Dlgap3	0.796054
Vps54	0.795181
Fam20a	0.79455
Ccr1	0.793977
Slc35e4	0.789203
Iglon5	0.78906
Gm5483	0.787307
Hif1a	0.785846
Zc3h12c	0.784616
Dab2ip	0.781782
Lamc1	0.781398
Runx2	0.779604
Tpbg	0.777122
Mt2	0.773109
Myo16	0.772125
Obsl1	0.772085
Rgs1	0.770063
Cebpd	0.76855
Ctla4	0.76696
Ctla2b	0.766776
Fam83h	0.766569
Il1r2	0.764411
Ptpn3	0.763437
Ern1	0.763016
Csf1	0.762121
Epn2	0.760262
Sv2c	0.759714
Cd2	0.757398
Med12l	0.756896
Casp6	0.756487
Gm16907	0.756006
Dusp14	0.755453
Mt1	0.755433
Gem	0.754312
Frmd4b	0.751553
Cysltr2	0.750685
Ebf1	0.748753
Bmpr1a	0.748652
C430002N11Rik	0.7475
Evi5	0.745887
Lamc2	0.745644
Cass4	0.744384
Arhgef12	0.742268
Itpripl2	0.741899
Ier3	0.741747
Glrx	0.740048
Mapkapk2	0.738227
Raph1	0.737817
Gm9199	0.737768
Foxc1	0.737015
Agpat4	0.736357
Plekhf1	0.735971
Srgap3	0.733914
Stk32c	0.733439
Tax1bp1	0.732978
Mir22hg	0.732917
Stard13	0.73131
Zbtb7a	0.731094
Rnh1	0.731064
Ralgds	0.730321
2010005H15Rik	0.729543
Gp49a	0.729044
Capza2	0.72801
Cttnbp2nl	0.726468
Etv6	0.725754
Emp1	0.724841
Ecm1	0.724002
Arl8a	0.723173
Srgn	0.722979
Pbx3	0.722779
Rnf216	0.722773
Marcks	0.722105
Cysltr1	0.721123
Atp2b4	0.720914
Ubl3	0.720459
Ly6i	0.719849
Ninl	0.718521
Prnp	0.716789
Egln3	0.7166
Ggta1	0.716272
Dsg2	0.716205
B3galt2	0.715476
Epha2	0.714073
Ermn	0.713352
Fam107b	0.713093
Gkap1	0.71265
Fam108b	0.712031
Malt1	0.711171
Lpxn	0.71094
Lamp2	0.710773
Gpc1	0.710321
Serpinf1	0.709538
Ccno	0.709232
Lhx6	0.709144
Rbpj	0.708826
Il12rb1	0.708427
Hlx	0.708108
Lilrb4	0.707826
Adam9	0.707273
Gatad1	0.706132
Gm15987	0.705683
Vmp1	0.705217
Sec24d	0.705036
Fam135a	0.704968
Tnfrsf8	0.704839
Fam129b	0.704485
Nek6	0.704477
Nfil3	0.702726
Slc4a4	0.702415
Hpcal4	0.701715
Kcnq2	0.701663
Casp4	0.701601
Chsy1	0.701235
Crybg3	0.700105
Cst7	0.699213
Srxn1	0.698129
Cd33	0.696545
Gm5615	0.696123
Chm	0.695955
Kif1a	0.695187
Fam131b	0.695055
Tmem51	0.694858
Mid2	0.694396
Adcy4	0.694366
Ly6a	0.693491
Ift43	0.691847
Cetn4	0.691483
Ahnak	0.691339
Iffo2	0.691078
Hipk2	0.690697
Ripk4	0.690514
Ovol2	0.690293
Rapgef5	0.689027
Fbxo30	0.688479
Dab2	0.68811
Kctd12	0.686108
Ncstn	0.686045
Cish	0.685818
Mt3	0.68553
Ltb4r1	0.684018
Creb3l2	0.683952
Arf6	0.683623
Plagl2	0.683539
Snta1	0.68282
Pmaip1	0.682671
Cited2	0.682226
Olfm1	0.682198
Ret	0.681369
Slfn10-ps	0.680796
Tex15	0.680732
Plcd1	0.679831
Jdp2	0.678369
Inha	0.67801
Vcan	0.677991
Riok3	0.677842
Chst11	0.677671
Rhoq	0.676651
Phospho1	0.676636
Socs1	0.675545
Pcyt1a	0.675207
Ell2	0.675054
9430020K01Rik	0.675036
Smox	0.674662
Tceb3	0.674453
Gm20594	0.67421
Gm16894	0.674182
Ftl1	0.672963
Ttc39b	0.671443
Tmf1	0.671388
Mgll	0.670752
Crlf2	0.669982
Car8	0.669462
Gm5127	0.669247
Wwp1	0.668797
Arid3a	0.668662
Rab39b	0.668602
Ndst3	0.667869
Fndc3c1	0.667447
Dusp16	0.667239
Foxq1	0.666412
Itgav	0.666141
Elk3	0.66599
Mafg	0.665224
Ston2	0.66455
Igsf10	0.664391
Il2rb	0.664153
Sema3f	0.663882
Slc4a7	0.663798
Galc	0.663658
Stx11	0.663524
Irs2	0.662911
Abca5	0.661919
Sox5	0.661806
Mmp13	0.661801
Thbs1	0.660889
S100a11	0.659981
Dysf	0.659616
Npr3	0.65954
Esm1	0.659353
Cd109	0.658931
Samd11	0.658916
Kitl	0.658832
B430319G15Rik	0.658192
Ifitm1	0.657633
Crip2	0.657508
Impad1	0.657352
B4galnt4	0.657252
S100a3	0.656361
Rnf19b	0.655943
5330426P16Rik	0.655679
Ctsb	0.655465
Rrbp1	0.655193
Tgoln1	0.654459
Slc5a10	0.654177
Cd300lg	0.653611
Pgs1	0.653212
Gpnmb	0.65185
Psme4	0.651671
Spry2	0.651344
Flrt3	0.651274
Ppp2cb	0.651205
Twf1	0.651165
Inhba	0.65093
Fmnl2	0.650888
Stom	0.650783
Spp1	0.650471
Selm	0.650194
1600029O15Rik	0.649854
Dmwd	0.649678
Oxsm	0.649581
Scn4b	0.649486
Adam8	0.649323
Ctdnep1	0.649137
Dock5	0.648616
Aebp2	0.648121
Muc1	0.64812
Msc	0.648087
Cldn12	0.647322
Ccdc63	0.64725
Acvr1	0.647224
Sema3c	0.647213
Ndrg4	0.6465
Adamtsl5	0.646179
Rims2	0.645203
Mrpl52	0.643377
Tubb6	0.643306
Sdf4	0.643104
Notch1	0.641885
Dgkg	0.64145
F2r	0.641006
Pou4f1	0.640905
Slc24a3	0.640897
Ccr2	0.640605
Mdm2	0.640439
Uhrf1bp1l	0.640212
Ism1	0.639736
Eps8	0.638798
Kcnc3	0.638767
Pik3ca	0.638703
F730043M19Rik	0.637814
Hbegf	0.637721
Stx3	0.63745
Fndc3a	0.636659
Tab2	0.636462
Rbm47	0.63621
Alpk2	0.634475
Gstm5	0.634076
Cdh17	0.633807
Bmp1	0.633746
Rnf6	0.633436
Atp6v0e	0.632736
Pla2g12a	0.632371
Snx25	0.631982
Nr2f6	0.631906
Picalm	0.630863
Myo1c	0.630829
Il2ra	0.630616
Myo10	0.630004
Mpzl2	0.629829
Tnfrsf4	0.628482
Ptpn5	0.628264
Ccdc85b	0.628083
Rhbdf2	0.627922
Cdkl2	0.62792
Zmat3	0.627473
Plxna1	0.627107
Eno2	0.626105
Tmed7	0.624913
Lgr4	0.624901
Nbl1	0.624561
Gpx8	0.624549
Camk2n1	0.624384
B9d1	0.623874
Rragd	0.623752
Kcnk5	0.623545
Dear1	0.623272
Nckap1	0.623163
Map3k6	0.622653
Gm805	0.622364
Ptgfrn	0.622337
Ccr3	0.622131
Man1a	0.621627
Col18a1	0.621627
Rai14	0.621423
Ctnnbip1	0.621309
Furin	0.621256
Nova2	0.62125
Igf2	0.621044
Cdc42bpb	0.620193
Chpf2	0.620137
Cela1	0.619897
Abi2	0.61983
Pafah1b2	0.618649
Atp6v0d2	0.618186
Eda2r	0.618055
Zfp703	0.617955
Zdhhc21	0.617799
Slc39a1	0.617764
Ube2q2	0.616605
Il24	0.61643
Ube2f	0.616389
Src	0.616237
Ckb	0.615825
Axl	0.615211
Tmem176a	0.614686
Tctex1d2	0.614629
Fam83g	0.614212
Casp3	0.613915
Fgfr1	0.613782
Ttc39c	0.613741
Cib3	0.613576
Vash1	0.613166
Fth1	0.613142
Med13l	0.613059
Mmp10	0.612413
Farp1	0.612396
Lag3	0.612081
Clstn1	0.612058
Adarb1	0.611926
Bcl2l15	0.611289
Bhlhe40	0.610978
Gzma	0.610975
Surf4	0.610752
4931429L15Rik	0.610428
Rbfox2	0.610183
Syngr3	0.609769
Podn	0.609504
Ccl4	0.6095
Snap25	0.608786
Batf3	0.608758
Jak2	0.608601
Slc39a8	0.608537
Ppfibp1	0.608466
Efhd2	0.605999
Plscr1	0.60595
Dstn	0.605919
1190002N15Rik	0.604982
Tec	0.604056
Perp	0.603522
Cobll1	0.603499
Cst3	0.603412
Bcl3	0.603279
Got1	0.603231
Calca	0.603197
Dixdc1	0.60301
Nfia	0.602996
Rnf11	0.602877
Bet1l	0.602631
Svip	0.602216
Gm12060	0.602206
Mllt4	0.601966
Gm4827	0.601594
Renbp	0.601379
Lrp8	0.601236
Nhlrc3	0.600348
Mefv	0.600267
Bcl2l2	0.600178
Itpripl1	0.600079
Akr1b8	0.599804
Pdcd6	0.599404
Uchl1	0.59939
Ankrd9	0.598863
Ptgs1	0.598428
Alcam	0.598252
Slc4a11	0.598007
Tcp11l1	0.597936
Tigit	0.597728
Snx24	0.597616
Pqlc1	0.597555
Hip1	0.597296
Prdm8	0.597136
Zfhx3	0.596802
Prdm4	0.596385
Klf8	0.596101
Sdc1	0.595929
F11r	0.595766
Tfcp2l1	0.59572
Ier5	0.595618
Repin1	0.595553
Lpgat1	0.595289
Gabarapl1	0.595211
Capn2	0.595121
D630045J12Rik	0.594364
Map3k8	0.594195
Oaf	0.593856
Carhsp1	0.593503
Bace2	0.592939
Ripk1	0.59283
Hc	0.592687
4932438H23Rik	0.592442
S100a10	0.592033
Areg	0.591947
Dip2c	0.591942
Lama5	0.591873
Mvp	0.591833
Rragc	0.59175
Ccl3	0.591723
Tmem176b	0.591714
Spred3	0.591591
Mdfic	0.59142
Synpo2l	0.591289
Zfp385b	0.591154
Fosl1	0.590914
Tmem163	0.590824
Plod2	0.590698
2700081O15Rik	0.59063
Ufm1	0.589495
Lin7c	0.589308
Tcf4	0.58897
Fbxo2	0.588884
Fst	0.58862
Zwint	0.588301
a	0.58812
Ankrd34b	0.587988
Snx8	0.587831
Sdcbp2	0.587359
Ypel4	0.587274
Sytl3	0.58672
Degs1	0.586675
Fam171b	0.586415
Gfra2	0.585267
F3	0.585241
Anxa4	0.585237
Olfr60	0.585094
Batf	0.58492
Tmbim4	0.584623
Fxyd5	0.584393
Dst	0.584139
5430417L22Rik	0.583311
1500012K07Rik	0.583283
Gas2	0.583232
D17Ertd648e	0.583185
Timp1	0.582769
Ehd1	0.582563
Pcdhga10	0.582295
Etv5	0.582119
Zbtb32	0.582019
Hao1	0.581956
Pttg1ip	0.581422
Vcl	0.581212
Slc39a14	0.581088
Twsg1	0.580717
Slco4a1	0.580177
Zeb2	0.57999
Prdm1	0.57988
Otud7b	0.579792
Lnx2	0.579711
Nedd4	0.579693
Spef2	0.57948
Fat4	0.579386
Uba1	0.579201
Ehd2	0.578855
Sbno2	0.578783
Armcx4	0.578689
Pde4c	0.578318
Sema4d	0.578243
Fhl2	0.57823
Mir5109	0.578193
Zyx	0.57809
Dmpk	0.578031
Plekhb2	0.577962
Ccdc40	0.577912
Klf10	0.577653
Plcg2	0.577527
Slc17a6	0.577507
Cab39	0.577409
Yap1	0.577099
Spsb2	0.575803
Tmem2	0.575372
4833419F23Rik	0.57528
Pdgfb	0.574845
Atp6v1e1	0.574769
Dach2	0.57458
Map4k5	0.574249
Stard10	0.574143
Ndfip1	0.573835
Gas8	0.573771
Glud1	0.573493
Gsr	0.573241
Mettl21d	0.573223
Cd63	0.573031
Slc37a2	0.572813
Mob1b	0.572711
Icam1	0.572646
Il1rl1	0.572632
N4bp3	0.571933
Nuak1	0.571658
4933425H06Rik	0.571359
Sema3a	0.570928
Hk2	0.570719
Nfyb	0.570112
Pak6	0.569878
Piwil2	0.56983
Gm19510	0.569824
Cd44	0.569766
2010107G23Rik	0.569588
Ubr5	0.569579
Iqsec2	0.569389
Cpeb2	0.568777
Rab1	0.568742
Fam122a	0.568742
Dock7	0.568586
Tmbim1	0.568542
Procr	0.568238
Dcbld2	0.567736
Gatm	0.567507
Ksr1	0.567488
Trpm4	0.567485
Dusp18	0.567354
Sel1l	0.567329
Cox5a	0.567256
Dlg2	0.567243
Ubl5	0.567136
Xpr1	0.567114
Srpr	0.566926
Tex14	0.566517
Pabpc1	0.566456
4930486L24Rik	0.56593
Gfra1	0.565925
Cdk9	0.565242
Gpm6b	0.564969
B4galt2	0.564268
Pkd2	0.564117
1700012B09Rik	0.564018
2310010J17Rik	0.563893
Ctsz	0.563607
Slc1a1	0.563554
Metrnl	0.56323
4930428O21Rik	0.562977
Chd7	0.562427
Epha1	0.562393
Thbd	0.562292
Myo1f	0.561934
Tnfrsf23	0.561918
Bmp2k	0.561482
Nlgn2	0.561287
Sema7a	0.561196
Lat2	0.561172
Gna13	0.560802
Tusc1	0.560525
Adora2b	0.56032
Htr2a	0.56008
Mfsd2a	0.56003
Cdk6	0.560014
Socs6	0.559808
Ubxn8	0.559658
Gm8615	0.559643
Traf6	0.559627
Ptprk	0.559527
Anxa3	0.559464
Gnptab	0.559127
Lsr	0.558818
Sphk1	0.558684
Arhgap32	0.557923
N4bp1	0.557883
Ddx28	0.55758
Ffar2	0.557342
Ptpn2	0.557134
Trove2	0.557022
Fut4	0.556933
Zfp503	0.556668
Cdkn1a	0.556448
Junb	0.5564
Capsl	0.556392
Ptgs2	0.556266
Emp2	0.556016
Miat	0.55581
Gcnt4	0.555644
Rgs20	0.555544
Klrc2	0.555078
Il3ra	0.555018
Ryk	0.554738
Prkar1a	0.554666
Golga7	0.554598
Tead3	0.554504
Pros1	0.554393
Cebpb	0.554343
D930020B18Rik	0.553906
Clec2l	0.553364
Plk2	0.553363
Eea1	0.553042
Clcn5	0.552824
Ncs1	0.552709
4931440P22Rik	0.552394
Gpr65	0.55234
Atp2b1	0.551998
Nkd2	0.551654
Cxcr1	0.551293
Xirp1	0.551148
Cask	0.55105
Cox8a	0.550954
2810025M15Rik	0.550766
Pik3ap1	0.550517
Dio2	0.550499
Ano1	0.550434
Arnt2	0.550154
6720401G13Rik	0.550091
Zfp385a	0.549986
Peg10	0.549843
Cdc42ep3	0.549717
Siglec5	0.54966
Ctsl	0.549295
Amotl2	0.549168
Slc13a3	0.548631
Espnl	0.548551
Ehd4	0.548527
Synpo	0.548444
Cltc	0.548115
Mgat2	0.547966
Gm14005	0.547859
Mtmr7	0.547847
Plek	0.547724
Anxa2	0.547633
Gnaq	0.547558
Gnpda1	0.546912
Klrc1	0.546832
Arx	0.546722
Havcr2	0.54667
Sla	0.546119
Arpc4	0.54609
Ppib	0.545909
Sall2	0.54572
Rab22a	0.54531
Gcnt2	0.545211
Tmem30a	0.545022
Col1a1	0.544977
Trib1	0.544071
Bcar1	0.543743
Trim8	0.543524
Cnih2	0.543406
Pwwp2b	0.543299
Sulf2	0.54326
Tnip2	0.543066
Entpd7	0.542899
Gm5122	0.54287
Krtcap2	0.542642
Rimkla	0.542573
E430025E21Rik	0.542286
E030011O05Rik	0.542179
Unc13a	0.542163
Sema6a	0.542043
Golt1b	0.541998
Gstt2	0.541944
Usp44	0.54187
Xylb	0.541796
Ptpn4	0.541605
Tgfb3	0.541418
Adap1	0.541376
Gm5416	0.540949
Me1	0.5408
Tbkbp1	0.54067
Cmklr1	0.540463
Tg	0.540419
Usp2	0.540415
Spire1	0.540241
Rufy4	0.540193
Mul1	0.539049
Aggf1	0.538884
Cbr3	0.538769
Gemin8	0.538761
Apol6	0.538732
Hdac4	0.538678
Gm6455	0.538388
Hormad2	0.538382
Sgk1	0.538283
Plbd2	0.538151
Trim16	0.53771
Mzf1	0.537576
Rap2a	0.537506
Mapk6	0.537338
Klf9	0.536713
Tspan3	0.536675
Upp1	0.536473
Myo5a	0.536453
Btg1	0.53626
Kif5b	0.536125
4930429B21Rik	0.53545
Fbxw8	0.535426
Fgl2	0.535308
Xcr1	0.534866
Sbds	0.534623
Stfa2	0.534574
Wdfy1	0.534402
Arl1	0.534306
Pparg	0.534249
Gm15401	0.534108
Chst2	0.533955
Papd4	0.533796
4931406H21Rik	0.533496
Rnf152	0.53343
Ak1	0.533196
Il1a	0.533119
Timd2	0.532821
Ubl7	0.532637
4930432J09Rik	0.532606
Enpp2	0.532394
Sesn2	0.532155
Rab7	0.531872
D15Ertd621e	0.531716
4930431F12Rik	0.531696
Gnb5	0.531621
Serinc1	0.531386
Nkpd1	0.53122
Ppp4r4	0.53113
Dusp3	0.530727
Mgat1	0.530556
Asb2	0.530499
Smtn	0.530448
Tnfsf9	0.53041
D16Ertd472e	0.530149
Abtb2	0.529993
2210408F21Rik	0.529595
Tgfb1	0.529558
Ccnd2	0.529553
Lrrc16a	0.52938
P2ry2	0.529177
Tnfsf13b	0.528826
Lgals1	0.52882
Rab36	0.528736
Fnip2	0.528563
Plk3	0.528541
Cldnd2	0.528488
9830001H06Rik	0.528007
Lrfn4	0.527888
Il7r	0.527431
Slamf7	0.527427
Ppfia3	0.52742
Stxbp5	0.527356
Rgag4	0.527005
Cd93	0.526959
Hemk1	0.526926
Rab2a	0.526781
2610037D02Rik	0.526681
Yes1	0.526572
Arl6	0.526544
Rbms1	0.52597
Hipk3	0.525872
9330179D12Rik	0.525741
Arhgap21	0.525402
Nucb2	0.525383
Sqstm1	0.525253
Gpr68	0.525244
Vim	0.525201
Txnrd1	0.525103
Ubtd1	0.524882
Arf1	0.524688
Tram1	0.524677
Ywhah	0.52459
Efemp2	0.524296
Cxcl2	0.523996
Stab1	0.523835
Filip1	0.523832
Gnai1	0.523762
Mir684-1	0.523525
Dhrs9	0.522626
Tnfrsf13b	0.522497
S100a6	0.522386
Plp2	0.522196
Atxn1	0.522164
Ggt7	0.521905
Osbpl1a	0.521645
Trim9	0.52161
Ccdc88a	0.521537
Trim71	0.521474
Zfp334	0.521451
Tbc1d12	0.52142
Ppp2ca	0.521206
D19Ertd737e	0.521158
Zfp768	0.520871
Trim66	0.520835
Dctn4	0.520749
Cdh2	0.520714
Sdc4	0.520636
Tmem67	0.520525
Fam78b	0.520387
Gap43	0.520352
Nabp1	0.520317
Tiparp	0.520248
BC022687	0.520099
Htr1b	0.519978
Epb4.1l4b	0.51991
Ncan	0.519596
Wsb2	0.519524
Spint1	0.519455
Ints12	0.519398
Grk5	0.519328
Nts	0.519222
Dcbld1	0.519037
Arhgef10l	0.518824
Pvrl3	0.518529
Tmem29	0.518526
Ptger2	0.518361
Socs2	0.518266
Ifng	0.518038
Pim1	0.518023
Vldlr	0.517912
2008-03-01	0.517902
Tmed2	0.517869
Kcnk7	0.517603
Olr1	0.517579
Inpp5a	0.51713
Hic1	0.517115
Nmnat1	0.516965
2005-09-01	0.516805
Frem2	0.516733
Pcgf2	0.516543
A930004D18Rik	0.516325
Fam179b	0.51624
2004-03-01	0.516063
Dgkk	0.515958
Lhfpl2	0.515872
Speer1-ps1	0.515809
Dyrk3	0.515704
Hmga1	0.51566
Ceacam16	0.515466
Nptxr	0.514921
Fkbp1a	0.51453
Lin28a	0.514385
Trp73	0.514219
Zfp715	0.514153
Syn1	0.514116
Mycn	0.513845
Ube2j2	0.51382
Muc13	0.513679
P2ry12	0.513662
Pgpep1	0.513656
Tm9sf2	0.513652
Ssr3	0.513606
Foxf1	0.513589
Chmp4b	0.513514
Agap1	0.513128
Lancl3	0.512886
Rem2	0.512774
C3	0.512457
Fuca2	0.512259
Tub	0.512249
Rabl5	0.512169
Irf4	0.512089
Fosl2	0.512
6530402F18Rik	0.511944
Sh3rf1	0.511872
Mif4gd	0.511775
Adc	0.511693
Yipf5	0.51158
Hsf2bp	0.511532
Sfr1	0.511349
Bbs5	0.511092
Syt5	0.511056
Ddr2	0.510697
Tns1	0.510367
Gprin3	0.510356
B3galt5	0.510162
Eif1a	0.51007
Sgms2	0.509795
Neb	0.509741
Nfat5	0.509597
Mir703	0.509537
Foxb1	0.509472
Rsph3a	0.509095
Speer3	0.508826
Golph3	0.508484
Sel1l3	0.508272
Stxbp1	0.508121
Etfb	0.508097
Gcnt1	0.50804
Rab31	0.507996
Gadd45g	0.507665
S1pr2	0.507228
Zfp518b	0.506981
5730508B09Rik	0.506581
Sos2	0.506561
Pkp2	0.506414
Fancf	0.506184
Wtip	0.506098
Onecut2	0.505927
Cth	0.505911
Cenpv	0.505329
Slc22a15	0.504936
Chpf	0.504894
Lrrfip2	0.504756
Zswim6	0.504434
Bik	0.504324
A330069E16Rik	0.504286
Gm9895	0.504195
Rgs16	0.504154
Csrnp1	0.504145
D10Bwg1379e	0.503962
Crtap	0.503842
Slc33a1	0.503746
Glipr2	0.503688
Basp1	0.503256
Slc1a2	0.503194
Kdelr3	0.502869
Rab18	0.502865
Ccz1	0.502849
E330020D12Rik	0.502815
Gorasp2	0.502781
Ptpn7	0.502781
Scn1b	0.5026
Gpr171	0.502517
Agpat9	0.502438
Fbxw7	0.502242
Lrrc58	0.50185
H2-Oa	0.501363
Trip10	0.501312
Scamp1	0.501226
Serpine1	0.500783
Mapkapk3	0.500539
2010012O05Rik	0.500134
Arl8b	0.50012
B230208H11Rik	0.499689
Lrrk1	0.499646
Pdcd1	0.499564
Rab11fip4	0.499512
Polr1d	0.49935
Jund	0.499331
Rhob	0.499307
Ptpmt1	0.499191
Tnfsf14	0.499103
Eif1	0.498876
Mid1ip1	0.498731
Tbc1d19	0.498406
Itga1	0.498286
1700019L03Rik	0.498259
Zfp800	0.498168
Rela	0.498044
Calcrl	0.497681
Entpd1	0.497302
Nfatc2	0.497001
Scel	0.496801
Manf	0.496626
Tmtc2	0.496564
Cstb	0.496493
Tle3	0.49639
C1rl	0.496272
Prkcsh	0.496241
Gm13889	0.496086
Slc2a1	0.496014
Gm6460	0.495933
Psd4	0.495933
Serf1	0.495816
Actg1	0.49543
Slc12a4	0.495285
Myh3	0.495224
Ly96	0.49514
Slamf1	0.495082
Anxa9	0.494564
Gsto1	0.494489
Wnt11	0.494404
Il18rap	0.494362
Fes	0.494271
Cd80	0.494217
Kcnj12	0.494161
1700101I11Rik	0.494116
Shroom3	0.493838
Gm1045	0.493642
Zswim4	0.493483
Btf3	0.493291
Egfr	0.492946
Prkcdbp	0.492877
Styk1	0.492507
Jarid2	0.492457
Clip3	0.492315
Prrg4	0.492084
Als2	0.491839
Ltbp3	0.491746
Tmem205	0.491587
Casp1	0.491402
Vdr	0.491071
Dpep2	0.491069
Ptpla	0.490755
Phlda3	0.490556
Zcchc3	0.490425
Six1	0.490094
Pmepa1	0.489964
Sccpdh	0.489803
Ahcyl1	0.489368
4933431E20Rik	0.489201
Msi1	0.489198
Gm11127	0.489167
Ccng1	0.489157
Vwa1	0.48909
Fbxo44	0.488743
Sh3pxd2b	0.488586
Srp14	0.488577
Dpy19l4	0.488461
Hilpda	0.488422
Zfand5	0.488299
Polk	0.488244
Arfgap3	0.488229
Rnd3	0.488205
4930539J05Rik	0.488123
Mfrp	0.488099
Cpd	0.487976
Cpeb4	0.487924
Prph	0.487876
Lmna	0.487599
Il31	0.487583
Agpat3	0.487432
Ccr4	0.487345
Nipa2	0.487316
Arhgef25	0.487316
Pex11a	0.487035
Brd2	0.48679
Dcxr	0.486783
5033411D12Rik	0.486766
Sirt2	0.486645
Lrrk2	0.486054
Rab5a	0.485816
Rassf8	0.4855
Ncam1	0.485488
Rpl39	0.48541
Napsa	0.484816
Zfp382	0.484813
Aldh1a3	0.484737
Speer6-ps1	0.484717
Tmem150a	0.484616
Rbm3	0.483951
Tollip	0.483404
Gm5065	0.483376
Cdc42bpa	0.483155
Ndfip2	0.483145
Dusp2	0.483142
6430531B16Rik	0.482942
Syngr2	0.482871
Cryba4	0.482755
Skap2	0.482686
Tmem167	0.482655
Ankib1	0.482301
Tmem151b	0.482157
Barhl2	0.482103
Gm4832	0.482075
Thy1	0.482001
Bend6	0.481687
Mafb	0.481463
Limd1	0.480995
Eid3	0.480896
Tulp4	0.480882
Igf2bp3	0.480846
Fam133b	0.480817
Akt1	0.480815
Stc2	0.480633
Snx9	0.480122
Fam57a	0.479955
Fndc3b	0.479634
Rabl2	0.479623
Mmp9	0.4795
Atp6v0a1	0.479032
Cdyl2	0.478725
Snhg8	0.478604
Slc17a7	0.478522
Cep170	0.478353
Scamp2	0.478193
Card10	0.477874
Med13	0.477642
Flot1	0.477573
Atg9b	0.47747
Snph	0.477384
Gpr55	0.476824
Ppt1	0.476693
Ssr4	0.476617
Gm16197	0.476597
Scpep1	0.476532
Plxdc2	0.476421
Slc3a2	0.476345
Trip11	0.476342
Ykt6	0.475799
Casc4	0.475704
Pgam1	0.475494
Iqgap1	0.475479
1700012D01Rik	0.475471
Rad23b	0.475105
Lum	0.474844
Kdm4d	0.474801
Uxs1	0.474784
Klf5	0.474573
Ube2v1	0.474394
Rab20	0.474372
Glipr1	0.474343
Hccs	0.474172
Tlr4	0.474131
Errfi1	0.47404
Ntng2	0.473807
Rgs8	0.473705
Lrrc59	0.473552
Asns	0.47336
Rilpl2	0.473232
Gnai3	0.473117
Cpxm1	0.472991
Tmem159	0.472858
Insrr	0.472554
Atf3	0.472493
5031414D18Rik	0.472316
Gpr141	0.472255
Gabarap	0.472182
Arfgap1	0.47214
Atp9a	0.472117
Cdyl	0.471867
Prkar2a	0.471708
Dkkl1	0.471591
Itgal	0.471557
Txndc17	0.471445
Cyb561	0.471313
Sema6b	0.471197
Midn	0.471122
Ldlrad2	0.471053
Nat8l	0.471024
Dusp4	0.470751
Gm2a	0.470619
Prss56	0.470546
Eif5a2	0.470493
Tjp2	0.47023
Rbp1	0.470194
Cav1	0.47017
Ints6	0.469924
Gdpd5	0.469922
Ufc1	0.4698
Gm14023	0.469681
Pcdhgb5	0.469564
Ndnf	0.469539
Il1rn	0.469517
Sh3d21	0.469435
Optn	0.469329
Pvrl1	0.469258
Plin2	0.468809
Kdelc2	0.468726
Bpifc	0.468436
Il33	0.468342
Lonrf3	0.467888
Uba52	0.467844
Eaf1	0.467559
Prelid2	0.467457
Erv3	0.467411
Btbd19	0.467384
Gcc1	0.467266
Tmem248	0.467265
Plec	0.467236
Rhobtb1	0.467149
Dnaja4	0.46706
5430427O19Rik	0.466764
Crabp2	0.466671
Cox6b2	0.466561
Cox5b	0.466443
Cd59a	0.46639
Serpinb1a	0.466389
Ift57	0.466363
Elmo2	0.466241
Fxyd7	0.46613
Fbxw11	0.466101
Akap1	0.466085
Gm2663	0.466042
Speer9-ps1	0.465976
Fcrl6	0.465916
4930478L05Rik	0.465867
Snx5	0.465281
Tet2	0.465194
Kctd14	0.465025
Angptl2	0.464919
Arhgdia	0.46491
Zfp821	0.464708
Elovl4	0.464668
Adora3	0.464589
Tes	0.464584
Ybx2	0.464557
Map2k3	0.464535
Kif5a	0.464514
Ndufa1	0.464505
Sgce	0.464504
Tpt1	0.464335
Wee1	0.464205
F2rl2	0.464089
Dsel	0.464083
Zfp422	0.46406
Zfp622	0.463681
Trim46	0.463609
Gab2	0.463507
4930413G21Rik	0.463318
Tlcd2	0.46329
Tnfrsf11a	0.463269
C1qtnf5	0.463105
Klf6	0.462631
Rfx8	0.462565
Rps4y2	0.462495
Rap1a	0.462419
Reep5	0.462397
Prr5	0.46237
Il10ra	0.462352
Rpsa	0.462293
Dcdc2c	0.462056
Slc16a6	0.461833
Sptlc1	0.461825
Sema3e	0.461683
Otogl	0.461678
Slc35a3	0.46162
Twist1	0.46153
Calhm2	0.461477
Slc35f5	0.461338
Dnase1l3	0.461124
Med10	0.461064
Pcdhga7	0.460818
Lman2	0.460646
Mocos	0.46062
Cgref1	0.460572
Fam108c	0.460556
Sobp	0.460393
Il3	0.46018
Phlpp2	0.460066
2310039L15Rik	0.459851
2900002K06Rik	0.459694
Tctn2	0.459689
Insl6	0.45933
Tmx3	0.459228
Ssbp4	0.459213
Gm5531	0.458881
Rasal2	0.45882
Cuedc2	0.458665
Cyp11a1	0.458417
Gpc6	0.458402
Ano7	0.458298
Il12rb2	0.458059
Enam	0.458039
Cpeb1	0.457435
Fbxo4	0.457383
Pou3f1	0.45722
Caskin2	0.457158
Scrt1	0.457153
Itfg1	0.457151
Lyrm1	0.456936
Zfyve9	0.456935
Mettl6	0.456846
Cyp3a13	0.456665
Stat3	0.456554
Ina	0.456489
Dnalc1	0.455969
Specc1	0.455954
Rcn2	0.455892
Tacstd2	0.455744
St5	0.455693
4933402N22Rik	0.455613
Tmx1	0.455548
AA467197	0.455428
Tmem33	0.455367
Oit3	0.455298
Stard8	0.455223
Stfa2l1	0.455219
Gm5077	0.455136
Kcmf1	0.4551
Timp3	0.455006
Fau	0.454994
D430036J16Rik	0.454923
Senp6	0.454815
Ssr1	0.454651
Ube2z	0.454507
Klhl35	0.454413
Ptrh1	0.454262
Rsph3b	0.45421
Txndc5	0.454196
1700018L02Rik	0.454153
Aplp2	0.454148
Ppap2c	0.454128
Smc5	0.453763
Acot7	0.453739
Galnt3	0.453414
Ppp1r15b	0.453306
Ahrr	0.453151
Slc25a4	0.452914
Crem	0.452695
Reep3	0.452635
Hook2	0.452429
Kank3	0.452326
Socs3	0.45209
Nol10	0.451569
Pdcd1lg2	0.451325
Ppp1r2	0.451304
Mmp3	0.451245
Fam110a	0.451156
Gan	0.45104
Slc9a5	0.450903
Ifitm2	0.450693
Wnk2	0.450658
Lzts1	0.450548
Slc25a24	0.450449
Slc16a3	0.450418
Tapt1	0.45002
Ranbp2	0.449983
Speer7-ps1	0.449952
Cdc34	0.449916
Acbd7	0.449752
Tagln2	0.449628
Ptprg	0.449582
Pacrgl	0.449573
Fgf9	0.449545
Arl4a	0.449381
Luzp1	0.449367
Dcaf10	0.449347
Pim3	0.449274
Stk40	0.449261
Ei24	0.449198
Zcchc14	0.449095
Prss57	0.44886
Gspt2	0.448806
Zdhhc2	0.448797
Gm10190	0.448733
Slc38a10	0.448724
Gprc5a	0.4487
Rpl27	0.448666
Kif1c	0.448559
Derl1	0.448509
Clu	0.448302
Nf2	0.448263
Ube2m	0.448256
Syngr1	0.448023
Adam15	0.447754
Pgm5	0.447697
Rn45s	0.447643
Arhgap23	0.447364
Selk	0.447099
Spred1	0.447034
Il11	0.447025
Efna5	0.446966
Endod1	0.446445
Qk	0.446323
C030037D09Rik	0.446304
Ccdc174	0.446227
Slc22a21	0.446217
E330009J07Rik	0.446118
Ndel1	0.446088
Urgcp	0.446048
Trerf1	0.445856
Adamtsl3	0.445843
Cst6	0.445704
Ahr	0.445589
Scyl2	0.445481
Birc3	0.445271
Arrdc4	0.445182
Pcdhgc3	0.445023
Mrpl33	0.444833
Rab12	0.444067
Ndst1	0.444053
Slc43a3	0.444048
Stbd1	0.443951
Spry1	0.443851
Rab11fip1	0.443786
Enah	0.44359
Fhl3	0.443456
Sec61b	0.443439
Chn1	0.443404
2900097C17Rik	0.443367
Krt18	0.443367
Six5	0.443266
H13	0.443021
Frmd6	0.44265
Ptpn13	0.44261
Tnfrsf10b	0.442466
A230077H06Rik	0.442385
Bag3	0.442257
Rgs9	0.442125
Med7	0.441839
Zcchc9	0.441825
Clta	0.441585
Itgb5	0.44154
Epcam	0.441221
Mpp6	0.441004
Mib1	0.440841
Rap2c	0.440574
Antxr2	0.440556
AW046200	0.44055
Aifm2	0.440207
Csf2	0.440062
Edf1	0.440021
Upb1	0.439953
Dcun1d3	0.439888
Osm	0.439882
Sval1	0.439598
Cyb5d1	0.439527
Cd200	0.439378
Rps15a-ps4	0.43934
Nphp1	0.439206
C1qtnf4	0.438944
Pdpn	0.438886
Rgs2	0.438883
Gatad2a	0.438476
Zfp191	0.438459
Acsl4	0.438285
Moxd2	0.438176
Amfr	0.438076
Adm	0.438012
Cyb5d2	0.438007
Palm	0.437942
Nrp1	0.437921
Mapre2	0.437829
Txn1	0.437772
Hps6	0.437662
Ociad2	0.437613
Frmpd4	0.437578
Lats1	0.437264
Rer1	0.437262
Psrc1	0.437233
Vmn2r55	0.437231
Man1a2	0.437211
Disc1	0.437079
8430427H17Rik	0.436998
Zfp839	0.436913
Slc12a2	0.436876
Shisa3	0.436653
Tspan5	0.436338
Stac2	0.43623
Ticam1	0.436148
Zfp941	0.435955
Naca	0.435913
Calm2	0.435778
Bdh2	0.435665
Tlcd1	0.435478
Gm996	0.435354
Hlf	0.435344
Ube2a	0.435283
Ddx3x	0.435216
Cd53	0.43511
Gm5088	0.435057
Atrnl1	0.434838
Rpl24	0.434764
Rara	0.434756
Dusp6	0.434627
Fam120a	0.434451
Ttbk1	0.434267
Csf2ra	0.434257
Padi2	0.434205
Pcdh7	0.434195
Dock6	0.434173
Zbtb46	0.43409
Nkg7	0.433777
Pdzd8	0.433765
Ppp1r3b	0.433664
Cox6a2	0.433656
Pcdhga4	0.433415
Csrp2	0.433318
E2f3	0.43328
Rpl29	0.432806
Gse1	0.432663
Strn3	0.432478
Ccdc104	0.432446
Prune2	0.432328
Pkd1l2	0.432143
Gnas	0.43211
Npdc1	0.432072
Asah1	0.432024
Kctd11	0.431792
Lacc1	0.431784
Mlf1	0.431636
Gng10	0.43154
Prrc1	0.431494
Kcnab3	0.431124
Tnfaip6	0.431097
Atp13a3	0.431081
Tgm2	0.4309
Zbtb38	0.430728
Zfp9	0.430706
Pkm	0.430599
Ier5l	0.430546
Cacnb2	0.430443
Sec22b	0.430361
Tmem65	0.430314
Ak4	0.430228
Adprm	0.43018
Ythdf2	0.430175
Hmga2-ps1	0.430075
Nsa2	0.430074
Yy1	0.429939
Dcun1d5	0.42947
Fam46c	0.429398
Cxcr2	0.428949
Ocln	0.428896
Myo1d	0.428814
Dnajc1	0.428758
Nrbp2	0.428583
Samd4b	0.428564
Rnf115	0.428465
Cul1	0.428461
Sec61g	0.428266
Slc6a8	0.428261
Atp1b2	0.428201
Tmem184b	0.428066
Pfn2	0.428045
Hspa2	0.428019
Gm5148	0.428001
Ankrd28	0.427819
Atp2c1	0.427789
Ghitm	0.427718
Abcc9	0.427429
Nucb1	0.426985
Mef2a	0.426973
Ero1l	0.426889
Gm8234	0.426691
Naprt1	0.426558
Lif	0.426555
Fzd6	0.426391
Rpl18a	0.42622
A930001C03Rik	0.426216
Zfp263	0.426128
Gzmb	0.426116
Trappc4	0.426102
Bach1	0.425977
Rnf149	0.42581
Fam105b	0.425794
Jag1	0.425665
A630033H20Rik	0.425653
Klrg2	0.425649
Rasgrf1	0.425465
Nedd9	0.425455
Tnip3	0.425419
Zfp575	0.425401
Grb10	0.425383
Dock3	0.425194
Gba	0.425191
Sdf2	0.425103
Zfp629	0.425076
Katnal1	0.424947
Serpinb5	0.42483
Glis2	0.424685
Myc	0.424158
Ccrn4l	0.4241
Gm17745	0.424039
Jmjd1c	0.424014
Grhl2	0.423831
Rps23	0.423782
Ndrg1	0.423769
Tctex1d1	0.423727
Snip1	0.423713
Plcb1	0.423692
Pla2g6	0.423662
Zmiz1	0.423648
Tmcc3	0.423416
Arih1	0.423134
Spats2	0.423119
Pcdhga11	0.423108
Ccl9	0.422942
Stau2	0.422868
Znf41-ps	0.422708
Pdk4	0.4227
Ly6c2	0.422653
Ttc16	0.4226
Aplp1	0.422548
Skil	0.4225
Gm13498	0.422394
Mei4	0.422376
Dagla	0.422312
Cx3cr1	0.422202
Irf8	0.422155
1810058I24Rik	0.422155
Fabp5	0.422119
Atp2a2	0.421864
Man2a1	0.421814
Rnf128	0.421721
Cyp4f39	0.4217
Map3k5	0.421697
Mtmr11	0.42155
Baz1a	0.421029
Tspan4	0.421012
Stfa3	0.420843
Slc15a3	0.4208
Kdelr2	0.420769
Ppp2r2c	0.420719
Tmed3	0.420714
Gnaz	0.420668
Mpped2	0.420558
Podnl1	0.420227
Car13	0.420043
Cables1	0.419795
Ss18	0.419752
Rps3	0.419729
Nploc4	0.41964
Dnajb5	0.419626
Ddx24	0.419386
Esd	0.419185
Grina	0.419176
Rapgef3	0.419108
Mst1r	0.418918
Fdxacb1	0.418739
Gm20098	0.41848
Mkrn2	0.418391
Usp39	0.418183
2810403D21Rik	0.418132
Ncald	0.41809
1810009J06Rik	0.418072
Edn1	0.41803
Marveld2	0.417876
Akirin1	0.417833
Cd28	0.417684
Lgi1	0.417683
Nkain1	0.417652
Slamf8	0.417576
Vps37a	0.417238
Tpi1	0.417156
Gm5069	0.416979
B230120H23Rik	0.416702
Mgat4b	0.416623
Arhgdig	0.416498
Nudcd2	0.416363
Eed	0.416197
Ptrf	0.415874
Eif3f	0.41586
Col5a3	0.415784
Gm20337	0.415642
Smad3	0.415492
Tpst1	0.415424
Jak3	0.415412
Nos1	0.41526
Aldh7a1	0.415123
Far1	0.414895
Bend4	0.414596
Tbx21	0.414492
Uggt1	0.41404
Rps14	0.413901
Gtf2b	0.413835
Kctd17	0.41375
Sln	0.413708
Tox2	0.413672
Ccdc59	0.413641
Eml1	0.413637
Dnaaf3	0.413448
Trappc10	0.413435
1810055G02Rik	0.413384
Rtn4	0.413346
Slc19a2	0.413029
Lrrc8b	0.412926
Flt3	0.412751
St6galnac6	0.412422
Lrp12	0.411974
D5Ertd579e	0.41197
Zbtb1	0.411935
Zc3h15	0.411729
Il4	0.411722
S100a4	0.411653
Odc1	0.41163
Cep76	0.411599
Eef1a1	0.411398
Fzd7	0.411349
Adamtsl4	0.411333
Slc25a13	0.411267
Myef2	0.41109
Sprr1a	0.411038
Mtpn	0.410907
Csgalnact2	0.410835
Lgi4	0.410788
Zbtb39	0.410721
Calcoco2	0.410677
Erc1	0.410651
1700003M07Rik	0.410621
Nsun7	0.410607
Cdh23	0.410606
Tbc1d2	0.410605
Ubxn2a	0.410584
Thap6	0.41056
Anxa1	0.4105
Lekr1	0.410411
Ier3ip1	0.410406
Dmxl2	0.41037
Hspa5	0.41036
Bak1	0.410195
Gimap5	0.410128
Sipa1l2	0.410072
Adam12	0.409985
Irak1bp1	0.409942
Bcl2l1	0.409926
Rps10	0.4097
Psmb1	0.409604
Dnajc21	0.40943
Cwc25	0.40924
Fam110c	0.409203
Zbtb16	0.408853
Capg	0.408747
Pdp1	0.408744
Tnf	0.408725
Myadm	0.408708
Phlda1	0.4086
Rps12	0.408384
Fut7	0.408291
Pde12	0.408164
Ergic2	0.408084
Itgae	0.407922
Smcr7l	0.407866
Gdap10	0.407775
Rpl26	0.407765
Blzf1	0.407741
Gm16516	0.407391
Rpl23a	0.407372
0610010F05Rik	0.406949
Nfkbie	0.406876
Fxyd1	0.406818
Calu	0.406791
Ltbp1	0.406761
Pth	0.406688
Abcd2	0.406615
Prickle3	0.40658
Mxi1	0.406417
Ctsw	0.406387
Rpl13	0.406204
Fam132b	0.406035
Clic4	0.405965
Lhx2	0.405959
Eng	0.405958
Gfi1	0.405887
Gstt3	0.40585
Alg10b	0.405749
Mpp2	0.405716
Rab43	0.405661
Gas7	0.405623
Eef1b2	0.405475
Slc24a1	0.405433
Fam183b	0.405074
Ctbp2	0.404983
Rps6	0.404839
Tmed9	0.404714
Cdk18	0.404598
Pld2	0.404589
Gm13251	0.404568
Spin4	0.404403
Sh3glb1	0.404316
Aim1	0.404311
Irx3	0.404108
D030040B21Rik	0.403898
Cxcl5	0.403884
Chpt1	0.403668
C1s	0.403593
Unc5b	0.403462
Tmem198	0.403448
Tmem128	0.403291
Tiam1	0.403267
Cnih3	0.4032
Rps21	0.403027
Sco1	0.403017
Ggn	0.402962
Wdr1	0.402946
Ece1	0.402925
Fam92a	0.402851
Sub1	0.402789
Mphosph6	0.40276
Hspb7	0.402606
Bco2	0.402563
Vapa	0.40255
Rpl4	0.402514
Rpl23	0.402436
Asap3	0.402399
Il22	0.40228
Grlf1	0.402007
Gls2	0.401968
Frrs1	0.40187
Sik3	0.401823
Arhgap18	0.401478
Klhl15	0.401454
Tnc	0.401348
Tcp1	0.401153
Rpl27a	0.401017
Zbtb7c	0.40099
Afg3l2	0.400728
Fxr1	0.400545
Scg2	0.400469
Lonrf1	0.400248
Samsn1	0.400245
Myof	0.400171
Ptger4	0.400168
Pkig	0.400064
Csnk2a2	0.399882
Rpl36a	0.399767
Fam71b	0.39973
Cdca4	0.399611
Btg3	0.399312
Ptprs	0.39906
Dusp22	0.398957
Lama3	0.398783
Fgf18	0.398753
Ctnnd1	0.398739
Sestd1	0.398678
Fzd10	0.398589
Hsd17b7	0.398493
Abt1	0.398374
Gm5523	0.39836
Gngt2	0.398178
Clic1	0.398083
Cplx2	0.39784
Pigz	0.397786
Hunk	0.397722
Agpat6	0.397707
Lrrc17	0.397612
Cwc15	0.397582
Ugt1a7c	0.397549
Pcdhgb2	0.397354
Prkcg	0.3973
Srp9	0.397195
D17H6S53E	0.397188
Armcx3	0.397059
Fbxw17	0.396853
5031426D15Rik	0.396826
Mfsd10	0.396741
Kifc3	0.39674
Capns1	0.396557
Rnf24	0.396389
Smo	0.396073
Ccdc122	0.395716
Rtkn	0.395617
Rps27l	0.395586
Tm9sf3	0.395575
Ipo7	0.395521
Dennd3	0.395471
6430571L13Rik	0.395442
Rraga	0.395361
Muc4	0.39536
Gfpt2	0.395293
Hs3st1	0.394985
H1f0	0.39484
Zfp719	0.394813
Rplp2	0.394607
Wnt9b	0.394535
Susd3	0.394433
Rps15a	0.394413
Arf4	0.394375
Zfp655	0.394289
Zfp462	0.394283
Inca1	0.394272
Enc1	0.394223
Dsp	0.394168
Dclre1a	0.394125
Polr1c	0.393969
Brox	0.39396
Slc25a33	0.393906
Hif3a	0.393782
Cdkl3	0.393507
Mmp19	0.393416
Dhdh	0.393386
Fbxo11	0.393354
Npnt	0.393322
Fscn2	0.393176
Ankrd29	0.393166
Vegfa	0.392968
Il17re	0.39287
Cndp2	0.392771
Cox4i1	0.392655
Sh3gl3	0.392352
Dctn3	0.392332
Ndufb9	0.392214
Lrp1	0.391976
Slc1a7	0.391942
Sec61a1	0.391889
Srsf9	0.391752
Copz2	0.391728
Gpt2	0.391691
Nkx3-2	0.391624
Strap	0.391587
Hecw2	0.391572
Ppp2r3a	0.391551
Rps5	0.391458
Tenm1	0.391166
Cgrrf1	0.391126
Mapk1ip1l	0.390938
Tor1a	0.390897
Mgarp	0.390811
Kank2	0.390806
Slc17a8	0.390794
Pappa	0.390768
Gm6981	0.390768
Tmem35	0.390715
Zfp57	0.390575
Mbnl2	0.390476
Mta2	0.390473
Zdbf2	0.39026
Azin1	0.390028
Hcn2	0.389975
Rsc1a1	0.389949
Cxcl3	0.389925
Pcdhgc5	0.389686
Cenpb	0.389546
Polr2m	0.389397
Hnrnpc	0.389396
Plcl1	0.389206
St14	0.389006
Guca1a	0.388963
Rest	0.388808
Arfgef1	0.388785
Abcc3	0.388782
Tox4	0.388702
Nt5dc3	0.388517
Kif3a	0.38844
Cox17	0.38815
Il23a	0.388111
Atp6v0c	0.388055
Rab14	0.388046
A730082K24Rik	0.387883
Fam43a	0.387824
Cd81	0.387288
Aprt	0.387243
Gde1	0.387066
Rrp1b	0.387025
Slc38a1	0.38695
Aqp9	0.386945
Unc80	0.386753
Sigirr	0.386407
Ebi3	0.386232
Nfkb1	0.386211
Emc7	0.386168
Fkbp11	0.386136
Npy	0.386089
Bag2	0.385988
Znhit2	0.385783
9030619P08Rik	0.385768
Nemf	0.385739
Arcn1	0.385719
Uba3	0.38568
Nrp	0.38564
Kremen2	0.385563
Lrrc47	0.385402
Eif4e2	0.385396
4930520O04Rik	0.385363
Nfkbiz	0.385127
Rpl41	0.384968
Gmppb	0.384961
Pltp	0.384939
Il1r1	0.38493
Snf8	0.384873
Myh15	0.384753
Cpped1	0.384596
Proser1	0.384513
Ninj1	0.384435
Bcat1	0.384431
Upk1a	0.384179
Ddit4	0.384113
Wasl	0.383803
Stk38l	0.383741
Rpl18	0.383734
Rpl36	0.3836
Fam132a	0.383474
Dpp8	0.383378
Col4a1	0.383299
Edem2	0.382961
Wee2	0.382908
AU019823	0.382864
Ccnd1	0.382839
Dgat1	0.38278
Sema5a	0.382685
Sec24a	0.382611
Ube2i	0.382404
Gm11696	0.382096
Ikbip	0.382074
Stx12	0.382052
Adra2a	0.381568
9130019O22Rik	0.381388
Chac1	0.381271
Adss	0.381264
Rlf	0.381009
Emilin2	0.380988
Il13ra1	0.380947
Rps24	0.380761
Ptprn	0.380727
Prdx5	0.380684
Plac8	0.38067
Rap2b	0.380636
Peli2	0.380563
Adssl1	0.38041
Akap7	0.38033
Ppp3r1	0.380218
[truncated: 10,743 more rows]

## Sheet: TFs correlating with IL-10
Gene Symbol	Similarity
Maf	0.818385		-1	-10	-9	-8	-7	-6	-5	-4	-3	-2	-1	0	0	0	0	0	0	0	0	0	0	0	0	1	2	3	4	5	6	7	8	9	10	+1
Foxf2	0.809026
Atf6	0.801719
Hif1a	0.785846
Runx2	0.779604
Cebpd	0.76855
Ebf1	0.748753
Foxc1	0.737015
Etv6	0.725754
Pbx3	0.722779
Lhx6	0.709144
Gatad1	0.706132
Nfil3	0.702726
Ovol2	0.690293
Creb3l2	0.683952
Cited2	0.682226
Arid3a	0.668662
Foxq1	0.666412
Elk3	0.66599
Mafg	0.665224
Aebp2	0.648121
Notch1	0.641885
Pou4f1	0.640905
Nr2f6	0.631906
Bhlhe40	0.610978
Bcl3	0.603279
Nfia	0.602996
Prdm8	0.597136
Fosl1	0.590914
Tcf4	0.58897
Batf	0.58492
Etv5	0.582119
Zbtb32	0.582019
Prdm1	0.57988
Nfyb	0.570112
Junb	0.5564
Tead3	0.554504
Cebpb	0.554343
Arnt2	0.550154
Arx	0.546722
Mzf1	0.537576
Pparg	0.534249
Asb2	0.530499
Hic1	0.517115
Hmga1	0.51566
Trp73	0.514219
Foxf1	0.513589
Irf4	0.512089
Fosl2	0.512
Nfat5	0.509597
Foxb1	0.509472
Onecut2	0.505927
Fbxw7	0.502242
Rela	0.498044
Nfatc2	0.497001
Btf3	0.493291
Vdr	0.491071
Six1	0.490094
Ankib1	0.482301
Mafb	0.481463
Limd1	0.480995
Klf5	0.474573
Atf3	0.472493
Twist1	0.46153
Med10	0.461064
Pou3f1	0.45722
Stat3	0.456554
Crem	0.452695
Trerf1	0.445856
Ahr	0.445589
Six5	0.443266
Edf1	0.440021
Zfp191	0.438459
Naca	0.435913
Hlf	0.435344
Rara	0.434756
E2f3	0.43328
Strn3	0.432478
Yy1	0.429939
Mef2a	0.426973
Zfp263	0.426128
Bach1	0.425977
Glis2	0.424685
Myc	0.424158
Skil	0.4225
Ss18	0.419752
Smad3	0.415492
Tbx21	0.414492
Zbtb16	0.408853
Nfkbie	0.406876
Pth	0.406688
Lhx2	0.405959
Irx3	0.404108
Hif3a	0.393782
Mta2	0.390473
Rest	0.388808
Atp6v0c	0.388055
Nfkb1	0.386211
Nfkbiz	0.385127
Sox21	0.379841
Nrbf2	0.37965
Foxp2	0.379549
Cdkn2b	0.374058
Rhox8	0.369725
Nanog	0.368036
E2f1	0.365934
Irf5	0.362759
Msx2	0.358926
Gabpb1	0.357911
Ankrd6	0.35602
Snai3	0.354521
Hey1	0.35305
Maff	0.351199
Usp16	0.350822
Gtf2h1	0.350609
Npas2	0.350498
Arntl2	0.350034
Elk1	0.349499
Rxra	0.347947
Egr2	0.347591
Pou3f2	0.345674
Tead1	0.341637
Foxr1	0.338244
Creb5	0.337549
Sox12	0.336425
Nfkb2	0.335397
Jun	0.333498
Dmrt2	0.333324
Pbx4	0.330209
Notch3	0.327462
Vax2	0.326945
Runx3	0.326357
Foxp4	0.321008
Bcorl1	0.313737
Nr4a2	0.312705
Atf5	0.310422
Etv1	0.310399
Sap30	0.305574
Foxj1	0.305145
Klf4	0.302826
Rorc	0.299535
Foxj3	0.296311
Uxt	0.29596
Sra1	0.294466
Ep300	0.288308
Mycbp	0.286176
Mnt	0.283314
Srf	0.282837
Nrg1	0.279673
Chd4	0.279096
E2f7	0.27809
Atf1	0.276907
Utf1	0.274589
Relb	0.272607
Ubtf	0.271052
Nfe2l1	0.26949
Taf11	0.268813
Glis3	0.26079
Rora	0.259382
Npm1	0.259139
Pus1	0.258652
Tbx20	0.257982
Etv4	0.256945
Nr1h2	0.251113
E2f4	0.248619
Zhx1	0.246304
Stat5a	0.246075
Mxd3	0.241543
Taf10	0.239699
Dpm1	0.238447
Tdg	0.236805
Atf4	0.235005
0610031J06Rik	0.232675
Tceb2	0.231956
Med6	0.231279
Maml3	0.229218
Taf9	0.22648
Cdkn2a	0.225587
Cbfb	0.225082
Rybp	0.224625
Alx4	0.223931
Gmeb1	0.222828
Foxo1	0.220558
Egr1	0.217868
Nr4a3	0.215242
Zbtb17	0.211949
Wwc1	0.211147
Etv3	0.209176
Tcerg1	0.208315
Fem1b	0.201467
Nolc1	0.200751
Zfp202	0.199273
Fosb	0.196663
Wdr77	0.195639
Pax8	0.191302
Bcl10	0.191197
Sirt1	0.19032
Cebpa	0.187694
Tfb2m	0.184231
Zfp367	0.182413
Sox4	0.181926
Adnp	0.181582
Yaf2	0.180023
Mafk	0.179858
Phf5a	0.176923
Pura	0.176364
Ube3a	0.175853
Arl2bp	0.175711
Tfdp1	0.174718
Rel	0.167473
Foxn2	0.160563
Grhl3	0.160046
Pitx1	0.158507
Ctnnb1	0.157881
E2f2	0.157466
Klf12	0.1556
Asb6	0.155147
Satb1	0.153153
Ddx1	0.151573
Nfatc1	0.151373
Hdac2	0.149311
Meis1	0.148405
Bcor	0.1472
Hsf2	0.139914
Tgif2	0.139369
Runx1	0.134618
Zfp219	0.131197
Trpv2	0.129794
Hhex	0.129045
Klf16	0.128086
Mta1	0.123928
Zfp189	0.123495
Icmt	0.121145
Srebf1	0.117623
Nr3c1	0.117449
Ylpm1	0.115805
Ugp2	0.11161
Hivep2	0.107556
E2f5	0.105541
Gata3	0.104672
Myb	0.104481
Scand1	0.103556
Aebp1	0.100176
Setd8	0.0990578
Mef2b	0.0975691
Cdkn2d	0.0938509
Pou2af1	0.0917159
Nr4a1	0.0900018
Foxm1	0.0890901
Cebpg	0.0879794
Zfp397	0.0878095
Tbp	0.0820732
Ppp1r16b	0.0810441
Asb1	0.0738204
Zkscan17	0.0737191
Aff1	0.0676091
Pa2g4	0.0666297
Per2	0.0664448
Znrd1	0.0654806
Mmp14	0.0654212
Preb	0.0601386
Nfya	0.060045
Irf2	0.0599249
Tbx2	0.058271
Hoxb4	0.0555995
Wwox	0.0515881
Fem1c	0.0504908
Atf2	0.0504808
Nfyc	0.0501541
Pou2f2	0.0476419
Creb3l1	0.0469925
Nfx1	0.0463074
Pfdn1	0.0458017
Esrra	0.0449151
Tal1	0.0442897
Hsf4	0.0434382
Mga	0.0424427
Tbl1xr1	0.0397413
Ddit3	0.0347477
Aatf	0.0339704
Epas1	0.0329982
Fem1a	0.0322072
Crx	0.0306268
Smad2	0.028738
Cdkn2c	0.0276986
Hmgb2	0.0267594
Nr1d1	0.0266057
Sp4	0.0249175
Erf	0.024598
Mtf1	0.0245505
Wnt4	0.0241474
Gabpa	0.0219428
Apex1	0.0165798
Nr3c2	0.0119621
Tcf19	0.0116512
Zfp281	0.00804112
Cited4	0.00784702
Hmg20b	0.006896
Fli1	0.00626388
Zfpm1	0.00374224
Ostf1	0.000635108
Smad1	-0.000299206
Mina	-0.000393799
Fos	-0.00077786
Rreb1	-0.00678496
Klf7	-0.00725193
Nr2c1	-0.00761393
Prmt2	-0.00765609
Ar	-0.00890808
Tcf25	-0.0125264
Trps1	-0.0125309
Aes	-0.0133635
Arntl	-0.0138335
Tead2	-0.0138635
Zfp449	-0.0155239
Mta3	-0.0158515
Cops5	-0.0172507
Elf4	-0.0180348
Bcl6	-0.0185655
Hoxb3	-0.0194813
Gcm2	-0.0198122
Snai1	-0.020746
Phtf1	-0.0208144
Clock	-0.0229811
Dyrk1b	-0.0399967
Bard1	-0.0429562
Maml1	-0.0441845
Ctbp1	-0.0484243
Srebf2	-0.0491684
Nfe2l2	-0.0503234
Casp8ap2	-0.0523205
Med19	-0.0566507
Thrap3	-0.0624985
Asb8	-0.0662333
Rnf20	-0.0753938
Kansl1l	-0.0756421
Smad7	-0.0760932
Lmo2	-0.080048
Ss18l1	-0.0844433
Nrip1	-0.0865307
Stk16	-0.086955
Med18	-0.0876386
Per1	-0.0879988
Mapk1	-0.0935568
Foxd2	-0.0936373
Thrb	-0.0944314
Gtf3c1	-0.098106
C1d	-0.0981332
Gtf2h3	-0.0988692
Otx1	-0.102882
Lpin1	-0.103713
Zfp174	-0.104616
Psmc3ip	-0.104865
Tle1	-0.107274
Abtb1	-0.107754
Pdcd2	-0.108568
Zfp148	-0.109393
Gpbp1	-0.110347
Ets2	-0.113531
Pycard	-0.113673
Crebbp	-0.114881
Ywhab	-0.116621
Atf7	-0.116641
Drap1	-0.119111
Mitf	-0.123321
Ankrd32	-0.123562
Hmga2	-0.123563
Sertad2	-0.125233
Ifi204	-0.125977
Mapk3	-0.127756
Ankrd54	-0.12937
Gtf2h4	-0.130886
Foxo3	-0.131591
Zbtb24	-0.133449
Nr6a1	-0.133494
E2f6	-0.134905
Actn2	-0.140014
Taf12	-0.141957
Usf2	-0.144895
Taf13	-0.146181
Gtf3a	-0.149919
Nfic	-0.157588
Ascc1	-0.170255
Spib	-0.171654
Ankra2	-0.171846
Zhx3	-0.174584
Zscan10	-0.175587
Stat5b	-0.177674
Pml	-0.177884
Zscan21	-0.178096
Pkn1	-0.178518
Rarg	-0.187511
Ppp1r12c	-0.188292
Ighmbp2	-0.188511
Creb3	-0.189673
Gcdh	-0.190077
Pou6f1	-0.192844
Dnmt3b	-0.194324
Irf1	-0.200914
Mtf2	-0.205383
Pmf1	-0.20607
Ppard	-0.210024
Nr1d2	-0.210304
Irf6	-0.211366
Mef2c	-0.213296
Slc4a10	-0.213779
Dbp	-0.218579
Tef	-0.219404
Zfp445	-0.220163
Pknox1	-0.220817
Mxd4	-0.22725
Hes6	-0.231758
Bmyc	-0.233265
Tsc22d3	-0.234236
Mkl2	-0.235302
Elf2	-0.235512
Ncoa6	-0.235736
Zfp639	-0.237046
Ncor1	-0.237783
Trpv6	-0.238958
Rcor1	-0.246319
Gtf2i	-0.247172
Bach2	-0.25059
Ets1	-0.251478
Smad4	-0.25178
Cry2	-0.251804
Tgfb1i1	-0.251927
Birc2	-0.25218
Smad5	-0.254287
Zkscan1	-0.267102
Zgpat	-0.272207
Dmap1	-0.27356
Hdac5	-0.273614
Thra	-0.275817
Ikzf1	-0.277513
Stat6	-0.277559
Smarca2	-0.282835
Stat1	-0.283959
Smarcb1	-0.284879
Pex14	-0.285746
Mef2d	-0.285759
Gtf2ird1	-0.286627
Tbx6	-0.288367
Zfp213	-0.292013
Eomes	-0.293414
Carf	-0.294226
Hsf1	-0.298976
Ldb1	-0.300273
Homez	-0.301036
Mrpl28	-0.305366
Chchd3	-0.305571
Gata1	-0.314017
Taf6l	-0.316544
Tdrd3	-0.317492
Zfp287	-0.320716
Tcf3	-0.322202
Usp22	-0.324359
Nfix	-0.324688
Pbx2	-0.326895
Stat2	-0.329284
Foxj2	-0.330831
Nr1h3	-0.332023
Elp4	-0.337911
Foxp3	-0.340467
Rfx3	-0.345196
Taf4a	-0.345371
Zfp446	-0.347037
Ehmt1	-0.352353
Mecp2	-0.365851
Phf12	-0.366268
Nrf1	-0.370233
Sp3	-0.370542
Taf7	-0.377939
Zfp110	-0.382334
Stat4	-0.384418
Tcea2	-0.386847
Zfhx2	-0.387972
Creb1	-0.391495
Esr1	-0.395513
Usf1	-0.398043
Lef1	-0.40336
Ankfy1	-0.40429
Sp1	-0.405467
Zhx2	-0.407566
Maz	-0.407978
Nr2c2	-0.414804
Taf5	-0.418281
Nrarp	-0.424381
Hdac1	-0.425641
Trp53	-0.426582
Bpnt1	-0.429883
Irf3	-0.431793
Atf7ip	-0.436133
Elf1	-0.443679
Arnt	-0.453112
Ankrd10	-0.453788
Rxrb	-0.455024
Nfatc3	-0.455973
Ing4	-0.45657
Npff	-0.457486
Foxk1	-0.458321
Tfam	-0.460544
Ecsit	-0.466594
Sp100	-0.471425
Atm	-0.473206
Psmd10	-0.477042
Taf1b	-0.477846
Atrx	-0.479261
Klf2	-0.484074
Fancl	-0.485919
Rere	-0.490472
Irf2bp1	-0.492166
Zscan2	-0.502676
Anks3	-0.517595
Tle4	-0.520254
Asb3	-0.524392
Ankhd1	-0.527029
Max	-0.542617
A130010J15Rik	-0.542778
Zfp369	-0.546504
Foxp1	-0.550839
Zcchc12	-0.558581
Ctcf	-0.567245
Irf7	-0.592529
Tcf12	-0.65369
Psip1	-0.665145
Tcf20	-0.676838
Btbd11	-0.702378
Cecr6	-0.705942
Tcf7	-0.710757
	1
	-1

## Sheet: IFNg correlating genes
Gene Symbol	Similarity
Ifng	1
Nkg7	0.932092
Cldnd2	0.93015
Tbx21	0.898897
Styk1	0.892674
Spns2	0.878468
Twist1	0.874887
Slc16a6	0.861384
Vcan	0.859656
Klrk1	0.851985
Wnk2	0.843641
Rasal2	0.842837
Mnda	0.841275
Irg1	0.840897
Klra3	0.840438
Ncald	0.830904
Icam1	0.828114
Ccl5	0.827679
Tbkbp1	0.82254
Tacstd2	0.819198
Cnih2	0.817885
Ppp2r2c	0.815625
Gnptab	0.807712
Il18rap	0.800893
Ly6c2	0.799513
Filip1	0.798761
Rims2	0.798726
Sytl3	0.797616
Mylk	0.794992
Pak6	0.792493
Irf8	0.789438
Ube2f	0.788642
Calca	0.787713
Ccl3	0.787439
Otogl	0.786939
Gm11435	0.779994
Zbtb32	0.779671
Il15ra	0.778604
Furin	0.776753
Ly75	0.774489
Tmod2	0.773204
Adora2a	0.770941
Gnaq	0.770831
Gzmk	0.769598
Hlx	0.762327
Fes	0.761358
Dclk1	0.761178
Il18	0.760965
Gstt1	0.760952
Mecom	0.760556
Csf1	0.759468
4930431F12Rik	0.759021
Havcr2	0.757847
Aste1	0.75782
Mpzl2	0.75769
Wnt10b	0.757503
Wdfy1	0.757384
Arhgef10l	0.755602
Gm14005	0.755559
Trim66	0.755266
Upb1	0.754255
Mmp13	0.753892
1700101I11Rik	0.752189
2810025M15Rik	0.751929
Dgkh	0.751301
Nlrp1a	0.750786
Fam132b	0.750167
Klrc1	0.748063
Alcam	0.747785
Casp4	0.747395
Stk19	0.745894
Ccl4	0.745462
Dsp	0.745449
Gpx8	0.744683
Vash1	0.744489
Spp1	0.743427
Ndnf	0.743022
Il23a	0.741294
Serpinb9	0.741287
Raph1	0.740445
Klhl30	0.740301
Fbn1	0.740108
Klrc2	0.739902
Sema6a	0.739746
Bco2	0.738412
Lancl3	0.738247
Picalm	0.737515
Gcnt4	0.736927
6530402F18Rik	0.736552
Ankib1	0.735556
Lyrm1	0.735546
Casp3	0.734348
Zeb2	0.73381
Speer9-ps1	0.733073
Spry2	0.732763
Ubd	0.731208
Zdbf2	0.731018
Esm1	0.730657
Plac8	0.730022
Gbp3	0.729176
Mpzl3	0.72908
Ksr1	0.728585
Uchl1	0.728425
Cxcr3	0.728409
Bst1	0.727926
Cxcl11	0.72787
Fhl2	0.725982
1600029O15Rik	0.725052
Tab2	0.724902
Onecut2	0.724524
Slc24a1	0.724263
Slamf8	0.723669
Btg3	0.723437
C430002N11Rik	0.721692
Ndfip2	0.719504
Eed	0.718895
Sulf2	0.718457
Hopx	0.716925
Itgal	0.715403
Chst11	0.715075
4933402N22Rik	0.71436
Tub	0.713694
Arhgap32	0.713358
Serpina3f	0.711025
Smpdl3b	0.710909
Ino80c	0.708162
Gad2	0.70763
Il1rl1	0.707323
Timp3	0.705855
P2rx3	0.705428
Galnt3	0.704948
Pou3f1	0.704543
Tle3	0.704388
Dram1	0.704146
Mid2	0.703995
Ufm1	0.702048
Stk32c	0.701024
Cxcl10	0.700422
Mt3	0.700149
Ptger3	0.69938
Speer7-ps1	0.698723
Tmem163	0.698688
Rn4.5s	0.698369
Tnfrsf11b	0.697998
Insrr	0.697843
Traf1	0.697522
Tspan3	0.697495
Lhfpl2	0.697185
Siglec5	0.697154
Gadd45g	0.697128
Speer3	0.695546
Plch1	0.69524
Cd109	0.694292
Ddn	0.693209
Tctex1d1	0.693168
Sphk1	0.692961
AW046200	0.692255
Ptger4	0.691931
2310010J17Rik	0.691566
Fam78b	0.69099
Ttc39c	0.690626
S1pr2	0.69001
Zbtb46	0.689827
Zfp57	0.689363
Atxn1	0.688675
Rgs1	0.688167
Speer1-ps1	0.687814
Chn1	0.68769
Plek	0.686844
Lrrc16a	0.686838
Xcl1	0.685938
Lacc1	0.685345
Ptpn5	0.685112
St6galnac4	0.68486
Tmem2	0.684642
Rab39b	0.684079
Snx8	0.683912
Mtpap	0.683577
Speer6-ps1	0.682475
Arx	0.682336
Erap1	0.682219
Cd93	0.681751
D19Ertd737e	0.681405
Sema3b	0.680606
Irx3	0.679975
Scyl2	0.679503
Tmco4	0.678784
Bcl2l1	0.67749
Snx9	0.677359
Serpinb6b	0.676753
Gas8	0.675053
Serpina3n	0.674677
Clic5	0.674603
Bloc1s4	0.674134
Rab36	0.671825
Tnip3	0.671471
Mettl21d	0.671104
Osbpl8	0.668705
Dll1	0.668125
Hao1	0.668094
Slamf7	0.668036
Utf1	0.668
Hist1h4n	0.667904
Il12rb2	0.666611
Rai14	0.666516
Ffar2	0.665299
Igf2bp3	0.664739
Gm6460	0.664601
Kit	0.663928
Lrrk1	0.663692
Gm6455	0.663556
Slc13a3	0.663524
Gpr141	0.663197
Mycn	0.662815
S100a11	0.662301
Gm5860	0.661163
Gbp2	0.661022
Serpina3i	0.660057
Minos1	0.66004
B230206H07Rik	0.658735
Nfkbie	0.65831
Ifi204	0.658162
H2afy3	0.657849
Etv5	0.657086
Gfra1	0.656561
P2ry12	0.656435
Cd70	0.656064
Ano7	0.655969
Acot7	0.655018
Ccl9	0.654614
C230052I12Rik	0.654355
Serpina3h	0.653694
1700012B09Rik	0.653282
Atf6	0.652985
Ssrp1	0.652842
Gpr65	0.652828
Ryr1	0.652698
Mmp9	0.652492
Il31	0.652392
Gm15471	0.652372
Ptprj	0.651047
Hist1h4c	0.650962
Rhbdf2	0.650923
Gbp5	0.650835
D8Ertd82e	0.650834
Chst2	0.649706
Ret	0.649428
Chsy1	0.648615
Rasgrf1	0.64831
Ece1	0.647683
Adam8	0.646848
Ehd1	0.646255
Nfkbib	0.645911
Rpe	0.645748
Msc	0.645737
Upf3a	0.645496
Ninj2	0.645249
F3	0.644927
Crybg3	0.644788
Utp23	0.644724
Hpcal4	0.644414
Hist1h1a	0.644191
Rhov	0.643742
Cxcr6	0.641195
Nedd9	0.641071
Srxn1	0.640915
B3galt2	0.640787
Ifitm1	0.640493
Ermn	0.640201
Arl8b	0.640028
Il3	0.640011
Mrpl33	0.639944
Anxa1	0.639783
Zc3h12c	0.639279
Rgs9	0.639176
1810009J06Rik	0.638931
D10Wsu52e	0.638814
Cobll1	0.638202
Dnajc15	0.638128
Ccr5	0.637985
Hist1h3e	0.637791
AU019823	0.637565
Rhoq	0.637223
Tmem38b	0.636972
Rabl3	0.636762
Ebf1	0.636535
Pole3	0.636417
Hpn	0.635404
Tnc	0.635332
Espnl	0.635028
Tmem151b	0.634916
Fgr	0.63448
Mir5109	0.633664
Slc24a3	0.633609
Nrp	0.633483
Cxcl16	0.632804
Tnf	0.632792
Pik3r6	0.632584
Hist1h4d	0.632527
Hist1h4m	0.632097
Il33	0.631123
Uxs1	0.630633
Gas7	0.629904
Slc26a10	0.629647
Pmaip1	0.629173
Dlgap3	0.629053
Samd3	0.628092
Tcte1	0.62608
Fasl	0.625141
Gm2663	0.625067
Arl6	0.625012
Tmem159	0.62473
Hist1h2bj	0.624497
Lrrc49	0.623602
Gcnt1	0.622918
Serpine2	0.621678
Pop1	0.621504
Upk1a	0.620863
Moxd2	0.620314
Plekhg4	0.620197
Fam120a	0.619515
Slmo2	0.619124
Shisa3	0.618998
Trmt10a	0.618771
Prdm4	0.618736
Lrch1	0.618556
Lhx2	0.618301
Lta	0.61781
Upp1	0.617427
Kcnh4	0.616807
Suv39h2	0.616505
Atp13a3	0.616416
Cav1	0.616313
Dennd4a	0.615974
Snrpb2	0.615729
Fam105b	0.615545
Il18r1	0.61494
Casp1	0.614811
Gp49a	0.614473
Pvt1	0.614094
Snx5	0.613546
Degs1	0.613389
Tmem65	0.613173
Fancf	0.613155
Crtam	0.613144
Gm867	0.6126
Alkbh3	0.612596
Impad1	0.612432
Plk2	0.612297
Serpina3m	0.61222
Wnt11	0.612198
Hist1h4f	0.612034
Tnfsf9	0.611718
Cyp27a1	0.611088
Kitl	0.610455
Lilrb4	0.610306
Itpripl2	0.609948
Gzmb	0.609404
Bcap29	0.609184
Ocln	0.609124
Ina	0.608873
Gpn2	0.608707
Magohb	0.608541
Gem	0.608315
Cd274	0.607269
Dnajc1	0.607163
Gm4951	0.607148
Mphosph6	0.606915
D17Ertd648e	0.606743
Agfg1	0.606002
Med10	0.605964
Dsg2	0.605319
Arf6	0.605186
Cst6	0.604935
Yrdc	0.604388
Slc30a3	0.604288
Mt2	0.60401
Nemf	0.603542
Rin1	0.603401
Fam72a	0.603133
Ccrn4l	0.60294
Krt16	0.602656
Stim2	0.602256
Amica1	0.601816
Rbms1	0.601782
Fmnl2	0.601611
Ccl1	0.601536
Slfn10-ps	0.601428
Pdcd6	0.601369
Dcun1d5	0.601218
Aggf1	0.601181
Ufc1	0.601173
Psmd9	0.601147
Dusp14	0.600378
Serpinb5	0.600251
S100a5	0.600105
Edf1	0.599995
Fzd9	0.599986
Glrx	0.599655
Smndc1	0.599506
Gbp1	0.599456
Ddt	0.599418
Gpc1	0.598984
Gpr56	0.598817
Acvr1	0.598612
Lrmp	0.598268
Insl6	0.598192
Runx2	0.597961
Pomp	0.59794
Dixdc1	0.597929
4933425H06Rik	0.597642
Slc25a14	0.597615
Itgav	0.597442
Csf2	0.597375
Cilp2	0.597356
Dhrs9	0.596615
Ubxn2a	0.59573
Foxp4	0.595329
Mapkapk2	0.595191
Sgms2	0.595125
Mst1r	0.594854
4930432J09Rik	0.594679
Ifitm3	0.594659
Tmem106a	0.594507
Ptrhd1	0.594337
Yap1	0.594064
Pdgfb	0.593991
Zbtb17	0.593384
Glipr1	0.593152
Cdkl2	0.593139
Ern1	0.592604
Psma2	0.592583
Gm13498	0.591776
Ggta1	0.591753
Lrfn4	0.591426
Ttc39b	0.590821
1190002N15Rik	0.590749
Hist1h3f	0.59017
Tmem167	0.589831
P2ry14	0.589518
Nfkb2	0.589248
Pcyt1a	0.589187
5430427O19Rik	0.589181
Ints12	0.588894
Insm1	0.58885
Ube2l3	0.588849
1700086O06Rik	0.588719
Nudt9	0.588686
Clec12a	0.588551
B9d1	0.588206
Nbl1	0.588173
Pld4	0.588161
Gm805	0.58735
4933404K08Rik	0.587335
Fas	0.587119
Hist1h1d	0.587088
Myef2	0.587013
Pih1d2	0.586989
Mir684-1	0.586984
Tmed5	0.586842
Ralgds	0.586796
Nid1	0.586649
Taf11	0.586541
Fam110a	0.586484
Cab39	0.586468
Slc20a1	0.586365
Six1	0.586141
Rgs3	0.584117
Car8	0.583315
S100a4	0.582997
Tnfrsf4	0.582863
9830001H06Rik	0.582392
Serp1	0.582207
Tox3	0.582145
Bcl2a1b	0.580644
Ell2	0.580182
Gabarapl1	0.579743
Eif1a	0.579486
Gm9776	0.579218
Tmem199	0.578805
Kcnip3	0.578703
2010111I01Rik	0.578273
Gfra2	0.578146
Abi2	0.57801
Scn1b	0.577922
Clta	0.57721
Man1a	0.577086
Rab7	0.576345
4930539J05Rik	0.576182
Psd4	0.575933
Strap	0.575405
Plscr1	0.574989
Gadd45b	0.574809
Snta1	0.574254
Cox5b	0.573478
Mafb	0.573379
Ttc30a1	0.573056
Hbegf	0.572596
Nufip1	0.572557
Hmox1	0.572242
2005-03-01	0.572167
Aen	0.571971
F730043M19Rik	0.571623
Pkd2	0.571297
Unc80	0.571054
Nrg1	0.571
Gm1045	0.57098
Rbm3	0.570901
Fbxw7	0.570446
Fnip2	0.570228
Larp1	0.569954
Eaf1	0.569683
Cdk9	0.569656
Agpat4	0.569647
Neto2	0.569546
Rad23b	0.569529
Ckb	0.569442
Psme1	0.569424
Oaf	0.569336
Ptpn3	0.569317
Dear1	0.568446
Tfcp2l1	0.568379
Slco3a1	0.567737
4833419F23Rik	0.567655
Cd44	0.567492
Snf8	0.567364
E2f3	0.56651
Slc9a5	0.566335
Irak2	0.566207
Dcun1d3	0.565881
Bhlhe40	0.565661
Il12rb1	0.565633
Efhd2	0.565439
Ovol2	0.564952
H2-T23	0.564828
Bcl2a1a	0.56481
Pafah1b2	0.563634
Tpm3	0.563382
Ccdc59	0.563331
Etfb	0.563292
Perp	0.562917
Cass4	0.562808
Memo1	0.562579
Xirp1	0.562523
Tm4sf19	0.562485
Pdzk1ip1	0.562458
Pop7	0.562404
Stx11	0.562388
Rgs20	0.562338
Pdgfc	0.562043
Atp1b2	0.561846
Ube2g2	0.561365
Smn1	0.560287
Pex7	0.56025
Gmppb	0.559663
Pilrb1	0.55963
Eif5a	0.559499
Rel	0.559242
Ankrd33b	0.559237
Hist1h1b	0.558779
Marcks	0.558772
Desi2	0.558514
Gm14718	0.557781
Zfp334	0.557305
Ddx20	0.556483
Bub3	0.556217
Ubxn8	0.556199
AW112010	0.556126
Jarid2	0.556078
Kdr	0.555884
Crcp	0.555788
Tmem222	0.555553
Med31	0.555268
Fgl2	0.555229
Lama3	0.55508
Txlna	0.555047
Nek6	0.554981
Tmcc2	0.554713
Il1a	0.55448
Myc	0.55443
Rab22a	0.554031
Vmn2r55	0.553943
Zfp207	0.553814
Ccnd2	0.553569
Uqcrq	0.553405
Pcna	0.553218
Bcl2a1d	0.553113
Slc24a5	0.553096
Cox6c	0.553074
Mapk6	0.552854
Ercc1	0.552142
Cdk5r1	0.552122
Erp44	0.551519
Hk2	0.551309
Dstn	0.551223
Tmem171	0.551154
Slmo1	0.551124
Fam107b	0.55089
AA467197	0.550734
Polr2m	0.550105
Reep3	0.549854
Cdc34	0.549656
Lrrc59	0.549504
Sult2b1	0.549065
Pacrgl	0.549051
Dab2ip	0.549013
Ptpmt1	0.54894
Hsp90aa1	0.548814
Ccnyl1	0.548761
Mettl10	0.548442
Lgals3	0.54833
Ccr2	0.548026
S100a3	0.547925
Txnrd1	0.547803
2310011J03Rik	0.547404
Ccz1	0.547134
Mafg	0.547063
Slc3a2	0.546752
Capzb	0.546674
Klri2	0.546275
Ahnak	0.546033
Naa20	0.545814
Lpin2	0.545789
Tmed7	0.545739
Ccdc41	0.545469
Hivep1	0.545272
2900026A02Rik	0.544914
Tpbg	0.544627
Timm10	0.544171
Tet2	0.544119
Tomm5	0.543914
Hnrnpab	0.54354
Med6	0.543449
Me1	0.543328
Psme2	0.543107
Arpp19	0.542871
Psd	0.542855
Tm6sf1	0.542844
Pcnp	0.542067
1700030J22Rik	0.541798
Tmem29	0.541312
Dip2c	0.541101
Plagl1	0.54099
Ccdc173	0.540953
Abcc1	0.540631
Ube2j2	0.540418
C030037D09Rik	0.540355
Cd160	0.540149
Cdc42ep3	0.540119
Mt1	0.539919
Ppan	0.539802
Crabp2	0.539787
Ly6i	0.539704
Lcp1	0.539411
Cops8	0.539012
Tnnc2	0.538586
Rapgef1	0.538363
Rsl1d1	0.537484
Calm1	0.537281
Nol10	0.537225
Ube2i	0.53696
Cacna1s	0.536864
Ccnd1	0.536522
Rnf7	0.536447
Ptprk	0.536438
Plaa	0.536427
Dpm2	0.536347
Mx1	0.536141
Fam20a	0.536012
Hist2h2bb	0.535838
Fgfr1op	0.535812
Gm18853	0.53547
Arrdc4	0.535305
Fxyd7	0.53512
1500012K07Rik	0.535069
Gosr2	0.534782
Adat2	0.534773
Fjx1	0.534741
Frmd4b	0.534641
Thap1	0.534393
Iglon5	0.534369
Kpna2	0.534309
Mmadhc	0.534242
Ssr1	0.533971
Mis18a	0.533967
Usp44	0.533836
Tmem248	0.533716
Tmem128	0.533696
Scg2	0.533517
Gm11974	0.533501
Slamf1	0.53297
Hcfc1	0.532825
Plcg2	0.53258
Scel	0.532528
Bak1	0.532396
Hist1h4i	0.532295
1700063D05Rik	0.531988
Fam171b	0.531732
Arap2	0.531649
Kpna3	0.531569
Zfp296	0.531438
Rfc3	0.53141
Ampd2	0.531404
Mid1	0.530806
Prss57	0.53074
Pik3ap1	0.530533
F830016B08Rik	0.530527
Fam98b	0.530459
Cables1	0.530413
Utp18	0.530003
Hnrpll	0.529879
Olr1	0.529822
Blzf1	0.529618
Ift57	0.529367
Nip7	0.529319
Gramd1b	0.529198
Spire1	0.528722
Arf4	0.528447
Tfpt	0.528244
Psmg4	0.527627
Fam129a	0.527563
Mdfic	0.527532
Mtx1	0.527528
Klf6	0.527426
Lpgat1	0.52721
9430016H08Rik	0.527206
Cysltr2	0.526467
Gtf2h1	0.526276
Zfp62	0.526093
Txndc9	0.525999
Map3k8	0.525956
H13	0.525779
Grhl2	0.52547
Odc1	0.525024
C1qtnf5	0.524908
Tmprss6	0.524862
Mob1b	0.524713
Samd4	0.524662
4933430I17Rik	0.52452
Frmpd4	0.52432
Znf41-ps	0.523916
Txlnb	0.523899
Gprin3	0.52355
Eps8	0.523493
Prpf40a	0.523429
Dcbld2	0.52305
Rbmx2	0.522978
Zcrb1	0.522918
Fam71b	0.522794
Alyref	0.522456
Phf5a	0.522246
Srp19	0.522133
Esd	0.522126
Hist1h2br	0.521914
Dph3	0.521674
Uck2	0.521456
Tdg	0.521324
Vma21	0.521126
Tnfsf14	0.520819
Bag5	0.520068
Tcf4	0.519829
Atp10a	0.519784
Fam185a	0.519695
Wsb2	0.5196
Fam133b	0.519377
Pdzd11	0.519376
Hspbp1	0.519352
Ccne2	0.519273
Frrs1	0.519195
C230081A13Rik	0.519184
Trappc4	0.518951
Sp7	0.518711
Ms4a6d	0.518703
Psma3	0.518652
Cyb5b	0.51861
4931429L15Rik	0.518397
Gm19510	0.518345
Mlf1	0.518142
Mcm10	0.518137
Il10	0.518038
Vta1	0.518019
Mtpn	0.517581
Ppa1	0.517438
Syt7	0.517222
Efr3b	0.517104
Slc17a6	0.516807
Mzf1	0.516806
Sh3rf1	0.516212
Etf1	0.516088
Fam83g	0.516081
Tpst1	0.516039
1700018L02Rik	0.515978
Klrg2	0.515636
Rilpl2	0.515605
Tes	0.515559
Nus1	0.515239
Fdxacb1	0.515225
2310014L17Rik	0.514858
Gm5088	0.514808
Kcnj8	0.514534
Hip1r	0.514259
Dclre1b	0.514112
Snrpd1	0.513841
Fyn	0.513763
Tmem40	0.513748
Nkpd1	0.513678
Mdm2	0.513325
Zfp593	0.513316
Tm9sf4	0.513293
Katna1	0.513186
Gtf2f2	0.513132
Cdc20	0.512965
Samd11	0.512852
Wisp1	0.512532
Ptgs2	0.512149
Sik3	0.511909
Mfrp	0.511898
Efha2	0.511796
Polr2c	0.511486
Nppc	0.511474
Trim71	0.511347
Snrpe	0.511341
Slc15a3	0.511211
Atp2c1	0.511157
Enc1	0.510983
Ccr1	0.510979
Aagab	0.510757
Ap1s3	0.510536
P2rx5	0.510522
Tmem33	0.510471
Ptp4a2	0.510364
Otub1	0.510254
Ctnna1	0.51011
Cflar	0.510054
Eea1	0.509996
Rap2a	0.509308
Mlkl	0.509157
Ythdf2	0.508964
D930020B18Rik	0.508826
Ube2n	0.508777
5830411N06Rik	0.508673
Socs6	0.508624
Foxc1	0.508554
Cdkn2a	0.508389
Med11	0.508368
Cdc73	0.508363
Klf10	0.507559
Cox7a2	0.507347
Pwwp2b	0.507169
Cmklr1	0.507045
Iqsec2	0.507034
Tnfrsf1b	0.507009
Pde7a	0.506602
Lsm12	0.506573
E2f4	0.506313
Slc25a33	0.506124
Ddx24	0.506088
Bspry	0.505977
Phtf1	0.505779
Mki67ip	0.50571
Myh11	0.505434
Slc1a2	0.505324
Rsl24d1	0.505271
Slc43a3	0.505259
Siah1b	0.504894
Hectd2	0.504629
Dlg2	0.504603
Itpa	0.504552
Nr2f6	0.504443
Rgs16	0.504286
Vps4b	0.504257
Miat	0.50409
Psma6	0.503928
Nkain1	0.503902
Plagl2	0.503861
Pdp1	0.503781
Bcl2l11	0.503576
Mrpl16	0.50355
2210039B01Rik	0.50336
Smcr7l	0.503318
S1pr3	0.503023
S100a6	0.502715
Twistnb	0.502695
Pelo	0.502606
Cstf3	0.502586
Psmd12	0.502495
Nhp2	0.502443
Dusp18	0.50236
4930429B21Rik	0.502135
Nespas	0.502051
Sema7a	0.502013
Epha2	0.502003
Ptma	0.502002
Pbx3	0.501976
Metap2	0.501854
Ywhae	0.501516
Itpkc	0.501504
Lag3	0.501394
Idi2	0.501363
Timm17a	0.501345
Ahcyl1	0.50116
Farp1	0.501113
Sparc	0.501092
Tal2	0.500934
Rrs1	0.500702
Il2	0.500591
Nckap1	0.500404
Golim4	0.500079
6330403K07Rik	0.49983
Gm16907	0.499652
Dnaja2	0.499611
Polr2f	0.499085
Clu	0.499047
Igtp	0.499
Hells	0.498875
Larp1b	0.498819
Kcns1	0.498696
Pbk	0.498681
Etv6	0.498642
Hhip	0.498578
Kcnj14	0.498507
Tcp1	0.498303
Caprin1	0.498081
Slc15a4	0.497808
Brms1	0.497798
Enthd1	0.497704
Il21	0.496855
Areg	0.496846
Tjp2	0.495886
Ptpn13	0.49571
Mrps30	0.495575
4931406H21Rik	0.495558
Supv3l1	0.495487
Snip1	0.495432
Rrp7a	0.49543
Rcc1	0.495405
Prkrip1	0.495393
Tmem51	0.495323
Fabp5	0.495234
Cisd1	0.495081
E330020D12Rik	0.494756
S100a10	0.49472
Gsto1	0.494682
Alkbh1	0.494629
Med27	0.494628
Taf1a	0.494537
Wnt9b	0.493969
LOC100503496	0.493902
Tax1bp1	0.49386
Polr3h	0.493856
Nfat5	0.493837
Anxa3	0.493819
Cdc45	0.493788
Ado	0.493725
Hist1h3c	0.493699
Cwc15	0.493637
Stard13	0.493627
Ddx28	0.493383
Rab28	0.493367
Arpc4	0.493218
Nmd3	0.492509
4930428O21Rik	0.492343
Angptl4	0.49224
Pim1	0.492083
Cx3cl1	0.49189
Kcnj12	0.491862
Naa15	0.491629
Dusp5	0.491619
Ifi27l1	0.491373
Arhgap21	0.49134
Tulp4	0.491287
Rabl5	0.491104
Cdkn2b	0.490499
Cycs	0.490379
Srp14	0.490244
Pfdn4	0.490085
Tigit	0.490006
Irf5	0.489942
1700037C18Rik	0.48987
Cyb5r4	0.489773
Pdcd1lg2	0.489642
Wdhd1	0.489612
2410127L17Rik	0.489587
Notch1	0.489451
Nabp1	0.48943
Senp5	0.489337
Pus1	0.489222
Polr1d	0.489201
Cyba	0.489089
Ccdc25	0.488865
Sestd1	0.488845
Abt1	0.488829
Gm20594	0.488772
Fdx1	0.488592
Ccdc55	0.488521
Lrrk2	0.488342
Prrg4	0.488312
Chchd7	0.488033
Map2k3	0.487993
Lin7c	0.487888
Cdc14a	0.487652
Pabpc1	0.487555
Xdh	0.487259
Phlda1	0.486905
Abtb2	0.486727
Kdm2b	0.486341
Il22	0.48592
Gm9199	0.485875
Agpat3	0.485727
Sec22b	0.48562
Srrd	0.48524
Cndp2	0.484943
Ogfr	0.484922
Hip1	0.484921
Dnajc21	0.484814
Pilrb2	0.484648
Rab11fip4	0.484635
Oxsm	0.484474
Psmd14	0.484378
Gm12504	0.48392
Enpep	0.483696
Id2	0.483363
9630033F20Rik	0.483324
Tra2a	0.483265
Eif4a1	0.483082
Papd4	0.482805
Klhl35	0.48279
Anxa2	0.482783
Hist1h2ac	0.48273
Cdv3	0.482543
Gm4827	0.482516
A330069E16Rik	0.482383
Lamc1	0.48235
Cox17	0.482007
Pcbp1	0.481968
Zc3h15	0.481879
Ier3	0.481856
Mtbp	0.481752
Trip13	0.481713
Rap2c	0.481685
Sema4c	0.481512
Scn9a	0.481438
Eif3b	0.481429
Gm17745	0.481424
Ifih1	0.481282
Mesdc1	0.481005
Riok1	0.480866
Mpp6	0.480733
Gbp7	0.480713
Rab1	0.48068
Ptprs	0.480574
Amh	0.480561
Gm5065	0.480419
Adora2b	0.480312
Arnt2	0.480005
Tmbim1	0.47993
U2af1	0.479806
2010012O05Rik	0.479642
Snw1	0.479551
Ube2e1	0.47939
Tbrg4	0.479389
Nfkbia	0.479021
Uhmk1	0.479012
Cbr3	0.478923
Ermp1	0.478783
Gsr	0.478737
Psma4	0.478736
Psmb7	0.478689
Kif15	0.478516
Scn4b	0.478237
Snrpa	0.478199
Gabpa	0.478073
Nop58	0.478056
Tbc1d19	0.477978
Chek1	0.477638
Emp1	0.477619
Pitpnb	0.477506
Ptpn7	0.477478
Isg15	0.477311
Krr1	0.477284
Top1	0.477246
Bmpr1a	0.477232
Edn1	0.477185
Gm13247	0.477011
Srek1	0.477009
1110008F13Rik	0.476897
Cd80	0.476767
Eme1	0.476755
Usp39	0.476656
Rhox8	0.476563
Ccdc86	0.476524
Ptrf	0.476294
Snrpc	0.476283
Psmf1	0.476091
Cish	0.475954
Erh	0.475905
Ccdc94	0.475819
Asb6	0.475775
Entpd1	0.475696
Cyp3a13	0.475656
Psmb2	0.475599
Arhgdig	0.475442
Gstt3	0.475367
Dcaf13	0.475008
Coq4	0.474943
Hspa8	0.474943
Phlpp2	0.47489
Mfsd2a	0.474846
Brix1	0.474843
Eif4e	0.474796
Eif4e2	0.474775
Clec2e	0.474697
Fnbp1	0.474469
Capza2	0.474254
Trmt5	0.474107
Ncam2	0.473923
Ppp1r12a	0.473626
Sec61a1	0.473608
Gnl2	0.473569
Zdhhc21	0.473503
Spin4	0.473464
Cdc27	0.473385
Ryk	0.473358
Mrpl18	0.47329
Zcchc9	0.472813
Ltbp1	0.472564
Spata5l1	0.472247
Taf9	0.472107
Itga3	0.472001
Clec2l	0.471723
Car12	0.471382
Pdcd1	0.471299
Dusp4	0.471244
Hspa1b	0.471073
2011-09-01	0.47105
Med7	0.470918
Ubtd2	0.470889
Anxa9	0.470601
Psma1	0.470595
Rbpj	0.470474
Srgn	0.47045
Gfod1	0.470196
Cdk1	0.470192
Mrto4	0.470155
Gzma	0.470154
Suco	0.470109
Nt5dc3	0.470083
Atp2a2	0.469992
Il2rb	0.469839
Tal1	0.469741
Tma16	0.469646
Mgat2	0.469614
Mak16	0.469495
Dnttip2	0.469474
Pdap1	0.469464
Nfyc	0.469446
Unc5b	0.469412
Gm13251	0.469227
Ddx49	0.468899
Sla	0.46849
Nphp4	0.468357
Sh3bp2	0.46822
Gbp10	0.468012
Rabif	0.467897
Nanog	0.467654
Ube2o	0.467651
Pdss1	0.467572
Ndrg1	0.467512
Gm12250	0.467185
Pou4f1	0.467165
Hnrnpu	0.467014
BC035044	0.467
Adam10	0.466845
Dctn3	0.466813
Alg8	0.466122
Csnk2a2	0.465992
Snap25	0.465853
Nipa2	0.465707
Zdhhc2	0.465614
Ube2l6	0.465602
Thbs1	0.465479
Iigp1	0.465344
N4bp3	0.46534
Gpr18	0.465185
Hmga1	0.465118
Inhba	0.465104
Tbl1x	0.464981
Ppp1r16a	0.464957
Emilin2	0.464766
Cox5a	0.464714
Polr1c	0.464575
Osgin2	0.464474
Akt1	0.464338
Gm5803	0.464228
Gtf2f1	0.464195
Bbip1	0.464178
Ncan	0.464146
Lysmd2	0.46367
Pno1	0.4635
P2ry2	0.463372
Mocs3	0.463342
Ciapin1	0.463316
Nfkb1	0.463305
Zfp385b	0.463246
Nr4a2	0.463189
Adap1	0.463081
Gm12060	0.463066
Emc7	0.463065
Ccno	0.462991
Car5b	0.46297
Ncf1	0.46282
Asna1	0.462748
Ftsjd1	0.462564
Lsm2	0.462534
Kcnk5	0.462452
Ybey	0.462307
Fbxl15	0.462225
Eif6	0.462215
Pin1	0.462157
Ubl5	0.462097
Ppp2ca	0.462076
F2rl2	0.461982
Relb	0.461828
Chac1	0.461651
Far1	0.461453
Epn2	0.461413
Yipf5	0.461241
Pou2f2	0.460991
Srsf3	0.460912
Sox5	0.46084
Nudcd2	0.460744
Clhc1	0.460644
Cenpi	0.460533
Ptprn	0.460483
Ran	0.460395
Myl12a	0.460308
Ranbp2	0.460276
Ebna1bp2	0.460052
Tnfrsf13c	0.46
Fam188a	0.459994
Axl	0.459944
A930004D18Rik	0.459896
Gjb2	0.459704
Nedd8	0.459612
Cdyl	0.459294
Mef2a	0.459224
Batf3	0.459107
D15Ertd621e	0.458988
Gnb5	0.458983
Nolc1	0.458979
Ly6c1	0.458924
Usp2	0.458601
2700062C07Rik	0.458515
Ccdc122	0.458449
Serbp1	0.458432
Surf6	0.458321
Cetn4	0.458155
4930507D05Rik	0.458134
Plk3	0.458065
Tesc	0.458003
Psmb4	0.457514
Hilpda	0.457447
Arpc1a	0.457378
Tra2b	0.457215
Ube2d3	0.456978
Siah3	0.456969
Ada	0.45691
Lman2	0.456676
Exo1	0.45665
Mrpl20	0.456493
Ctnnal1	0.456472
Naf1	0.456365
Ykt6	0.456253
Exosc9	0.456248
Lin28a	0.45622
Rbm8a	0.456216
Ska3	0.456108
Fam60a	0.456101
Tmem165	0.455803
Aoc3	0.455751
Golt1b	0.455743
St3gal4	0.4556
Wdr43	0.455556
Foxf1	0.455496
Mul1	0.455442
Slco4a1	0.455212
Il1rn	0.455093
Znhit2	0.454907
Adam9	0.454861
Emc3	0.45469
Atad1	0.454298
D930015E06Rik	0.454197
Mnd1	0.454195
Itgb1	0.454117
Ctnnbip1	0.453731
Aig1	0.453709
Hsf2	0.453585
Cenpn	0.453312
Tlcd1	0.453141
Clic4	0.453105
2810417H13Rik	0.452897
Pam16	0.452845
Zswim4	0.452811
Spred1	0.452704
Capn2	0.452625
Capsl	0.45262
Slc35d3	0.45222
Slc35f2	0.452075
Pde4c	0.452011
Tpm4	0.451771
Yipf4	0.451597
Gatad1	0.451319
6720401G13Rik	0.450809
Fbxo48	0.450615
Aebp2	0.450567
Traf2	0.450524
Alox12b	0.450511
Rrad	0.450482
Ccr3	0.450447
Alg10b	0.450385
Gtf3c5	0.450264
Tex15	0.450251
Il18bp	0.450246
Gbp6	0.450215
Serpinb9b	0.450149
Asns	0.450129
Pom121	0.450084
Ptges3	0.45003
Atg16l1	0.450003
Cks1b	0.44985
Polr3d	0.449753
Camk2n1	0.449732
Gng10	0.449715
Twf1	0.449713
Arhgap17	0.44961
Tfdp1	0.449189
Slc5a10	0.449181
Ddx21	0.449049
Rrp1b	0.448996
Ly6a	0.448774
E2f8	0.448711
Uhrf1	0.448558
Klrd1	0.448409
Gzmc	0.448253
Rad51	0.4482
Bace2	0.448154
Exph5	0.448152
Rangap1	0.448042
Gtpbp4	0.448038
Tnfsf8	0.447792
Adrm1	0.447678
Shfm1	0.447654
Fxyd1	0.447574
Gls	0.447562
Plekha3	0.447365
BC030867	0.447333
Gmeb1	0.447299
Kif5b	0.447203
Tmed2	0.447164
Timm23	0.447123
Kdm4d	0.447037
Errfi1	0.446712
Wbp11	0.446698
Ldlrad2	0.44663
Cnbp	0.446421
Tagap	0.446381
Ier5	0.446179
Cand1	0.446073
Mtdh	0.445906
Fbxo45	0.44581
M6pr	0.445609
Bcat1	0.445535
Cdc6	0.445364
Cep55	0.44529
Mcoln2	0.445234
Mrpl46	0.445216
Myo10	0.444966
Aplf	0.444852
2004-03-01	0.444734
Gm16516	0.44467
Atf1	0.44448
Srsf2	0.444392
Cox7b	0.444295
Cpne5	0.444123
Ywhag	0.443907
E2f7	0.443839
Rrbp1	0.443823
Lctl	0.443761
C330027C09Rik	0.44373
Ube2c	0.443653
Fignl1	0.443383
Gm8994	0.44337
Epb4.2	0.443355
Myo5a	0.443074
D17Wsu104e	0.442917
Dnajb11	0.442394
Lztfl1	0.442385
Socs7	0.442342
Icam5	0.442049
Gan	0.441808
Gm10560	0.441593
Dimt1	0.441548
Bysl	0.441513
Aimp2	0.441392
Srp54b	0.441232
Lcp2	0.44109
Troap	0.441045
Stxbp5	0.441014
Usp16	0.440988
Txn1	0.440973
Hlf	0.440667
5031426D15Rik	0.440638
Psma7	0.440613
Wdr3	0.4406
B4galnt1	0.440587
Eif2s1	0.440528
Il11	0.440354
Fhdc1	0.440285
Arl1	0.440237
Rrm2	0.439894
Sephs2	0.439833
Magoh	0.439755
Gja1	0.439633
B4galt2	0.439522
Pdcd10	0.439368
Lrrc47	0.439326
Hist1h1e	0.439136
Nlrp3	0.43913
E2f1	0.438891
Cdc37	0.438877
Tagap1	0.438767
Lyar	0.438766
Rab11fip1	0.438667
Tatdn2	0.438655
Zglp1	0.438571
Ppp2r2a	0.438569
Grasp	0.438501
Tns1	0.438491
Tnfaip6	0.438423
Slirp	0.43835
Ptpla	0.438317
Gpr171	0.438307
Grhl3	0.438265
Hist1h2ak	0.438156
Eif1ax	0.438142
Cacybp	0.438085
Orc1	0.438052
Fam108c	0.437754
4930513N10Rik	0.437743
Baiap2	0.437626
Taf10	0.437621
Snrnp35	0.437195
C3	0.437155
Slc12a4	0.436945
Gm5531	0.436823
Nfyb	0.436715
Il2ra	0.436626
Smarce1	0.4366
Gm15645	0.436453
Egln3	0.436326
Gzmm	0.436164
9030619P08Rik	0.435994
Mfsd5	0.435943
Nhlrc1	0.435916
Manbal	0.435898
Sec23b	0.435757
Ndel1	0.435677
Cyr61	0.435664
Plod2	0.435583
Atp6v0b	0.435491
Hspa1a	0.435248
Fbxo11	0.434997
Gch1	0.434912
Skida1	0.434764
Ewsr1	0.43457
Clcn5	0.43456
Zfx	0.434554
Kri1	0.434534
Gm6654	0.43438
Txnl4a	0.434244
Tnfrsf9	0.434148
E030024N20Rik	0.433886
Aspm	0.433727
Rsph3a	0.433578
Nudc	0.433503
Snrnp27	0.433401
Arc	0.433326
Nfil3	0.433289
Flt4	0.433108
Arid3a	0.432958
Nphp1	0.432911
5730508B09Rik	0.432831
Osr2	0.4328
Tmem185b	0.432486
Kcnq2	0.432444
Slc35d1	0.432416
Dtymk	0.432378
Sms	0.432373
Zc3h7b	0.431983
Lzic	0.431975
Senp6	0.431893
Evi5	0.431892
Lap3	0.431877
Dclre1c	0.431876
Tomm20	0.431785
Mrpl52	0.431704
Cyb5d1	0.43157
Usp36	0.431514
Sema3f	0.431469
Srsf9	0.431463
G3bp1	0.4314
Itga1	0.431361
Ceacam16	0.430876
Gnai3	0.430863
Nup54	0.430461
Prr5l	0.430406
Bend4	0.430159
Sf3a1	0.430112
Tmem68	0.429981
Dbr1	0.429967
Zmynd19	0.429901
Slfn2	0.429865
Fastkd2	0.42986
Dis3	0.429784
Mefv	0.429727
Nol7	0.429659
Cenpv	0.429563
Stx3	0.429158
Rpl7l1	0.428789
Nap1l1	0.428718
Apex2	0.428577
Kctd17	0.428545
Denr	0.428449
Med9	0.428334
Ppp1r11	0.428286
Traip	0.42822
Emc4	0.428207
Nhp2l1	0.428206
Zswim6	0.428137
B430319G15Rik	0.427974
Tceb1	0.427972
Ankrd32	0.427606
Slc7a5	0.427534
Sar1a	0.427451
Mtf1	0.427445
Setd8	0.427192
Syngr2	0.427067
Chaf1a	0.426981
Rela	0.426964
Ncs1	0.426848
Eif3a	0.426817
Amotl1	0.426705
Ncapg2	0.426661
Ccrl2	0.426445
Psme3	0.426322
Sf3b5	0.425988
Mif	0.425872
Pgam5	0.425669
Spint1	0.425594
B3galt6	0.425576
Dlgap5	0.425559
Eomes	0.425511
Neb	0.425498
Riok2	0.425493
Elk3	0.425391
Gnl3	0.425196
Imp4	0.425145
Rars	0.425112
9030025P20Rik	0.425096
Utp3	0.425076
Gca	0.425063
Nubp2	0.425003
Vps54	0.424919
Chl1	0.42489
Plk4	0.424685
Dmxl2	0.424567
Ppig	0.424444
Traf3	0.424319
Rpf1	0.424231
Specc1l	0.424128
Tgfb1	0.42404
Lyst	0.423886
Zmiz2	0.423475
Mrpl54	0.423385
Shmt1	0.423293
Gar1	0.423178
Fscn1	0.423122
Cttnbp2nl	0.423056
Snhg5	0.423039
Cst7	0.422936
Sap30bp	0.422916
Thbd	0.422761
Gpr3	0.422748
Tomm22	0.422739
Kif4	0.422701
Ifrd1	0.422612
Ccdc50	0.422542
Acsl5	0.422516
Shcbp1	0.42228
Fgd2	0.422262
Cd74	0.422245
Sesn2	0.422233
Cd2bp2	0.422185
Sfpq	0.422179
1110038F14Rik	0.421746
Prnp	0.421633
Hif1a	0.421629
Rps4y2	0.421583
Zwint	0.421557
Atp2b4	0.421312
Wee1	0.42125
Scn2b	0.420957
Utp15	0.420899
Hccs	0.420878
Kti12	0.420635
Arhgef5	0.420626
Fgf18	0.420545
Rabl2	0.420496
Srpr	0.420477
Sf3a2	0.42013
1810022K09Rik	0.419861
Dok1	0.419844
Lrr1	0.419787
Elavl1	0.419783
Clec7a	0.41976
Ripk4	0.41964
Psma5	0.41952
Dhx9	0.419375
Il1r2	0.419174
Synpo2l	0.419173
Optn	0.418995
Mrpl12	0.418932
Syncrip	0.418748
Nop2	0.418737
Arhgef2	0.418705
Ccdc32	0.418612
Zc3h13	0.418584
B2m	0.418583
Ano1	0.418496
Lnx2	0.418319
Ndufb7	0.418212
Gmps	0.418184
Ddx47	0.418114
Adss	0.418088
Mllt6	0.418022
Dohh	0.41788
Orc6	0.417827
Sbds	0.417455
Ccnb1	0.417443
Uap1	0.417381
Hspa5	0.417304
Mybl2	0.417254
Cd82	0.41706
BC022687	0.416967
Grpel1	0.41693
Rtp3	0.416773
Rad51ap1	0.416689
Ndufs6	0.416558
Nudt4	0.416514
Sdc4	0.416483
Cdh17	0.41643
Rab8b	0.416398
Arl8a	0.416316
Map4k5	0.416305
Sumo2	0.41627
Uhrf1bp1l	0.416217
Crip2	0.416106
Ndufa1	0.416092
Rnf4	0.416073
Lum	0.416031
Kif2c	0.415985
Fosl1	0.415726
Lgals1	0.415684
Psmc3ip	0.415115
Tnfsf11	0.415038
Fam49b	0.414956
Sox21	0.414953
Tsr1	0.414894
Spry1	0.414784
Tomm40	0.414656
Gm4841	0.414477
Prss30	0.41447
Cirh1a	0.414419
Scly	0.414375
Iqgap1	0.414119
Dnalc1	0.4141
Ctsz	0.414047
Atf3	0.414004
Tnfsf10	0.413885
Eef1e1	0.413653
Bud31	0.413564
Npat	0.413331
Rgs8	0.413235
Hnrnpa1	0.412723
Nlgn2	0.412709
Rnaseh1	0.412557
Etv4	0.412513
Dnajc25	0.412461
Hn1	0.412344
Ttll4	0.412318
Tcerg1	0.412254
Jun	0.412249
Snrpf	0.412225
Nuf2	0.412094
Zbtb7a	0.412056
Tmem11	0.412041
Mark3	0.411985
Ism1	0.411959
Gins1	0.411949
Orai1	0.411882
Pdzk1	0.411434
Ngdn	0.411315
Dhrs7b	0.411092
Mki67	0.411072
Rbpms2	0.411071
Srek1ip1	0.41107
Fam32a	0.410753
Hist2h2ac	0.410748
Ctla2a	0.410644
Cask	0.410623
Nos2	0.410537
Tjap1	0.410452
Csnk2b	0.410386
BC005624	0.410326
Cdk6	0.410299
Trim16	0.410229
Dkc1	0.409846
Ctps	0.4098
Naa50	0.409757
Fmr1	0.409664
AI662270	0.409493
Mrpl3	0.409483
Cyp4f39	0.409482
Elof1	0.409457
Vapa	0.409435
Nob1	0.409424
Cog2	0.409308
Fam122a	0.409284
Gkap1	0.409148
Bzw1	0.409089
Edaradd	0.409074
Tmem39a	0.408914
2700038G22Rik	0.408914
Dtl	0.408866
Cd200	0.408866
Mgll	0.408753
Cacnb4	0.408599
Exoc5	0.408484
Rnf19b	0.408452
Kndc1	0.408352
Srfbp1	0.408224
Hmgn3	0.408151
Rps27l	0.408018
Kars	0.407936
Cox11	0.407779
Iffo2	0.407638
Elp5	0.40763
Actr2	0.407566
Sar1b	0.407484
Clstn1	0.407457
Arl5b	0.407407
Stx6	0.407084
Tceb2	0.407008
Trmt61a	0.406924
Socs4	0.406872
Nsun2	0.406863
Rapgef5	0.406839
Cdkn1a	0.406495
Zfp622	0.406435
Cebpb	0.406427
Cenpe	0.406331
Hpdl	0.406296
Senp3	0.406226
Mthfd2	0.406198
Mrpl47	0.406185
Hist1h2be	0.406068
Azin1	0.406044
Slc4a7	0.405796
Sap18	0.40563
Gspt2	0.405618
Prr5	0.405405
Kif18b	0.405239
Taf4b	0.405146
9930014A18Rik	0.40496
Setbp1	0.404947
1700012D01Rik	0.404899
Uba3	0.404745
Olfr56	0.404548
Prmt6	0.404534
Cdh23	0.404477
Eif2b1	0.404445
Stam2	0.404407
Pip4k2c	0.404404
Larp4	0.404202
Kcnk10	0.404136
Mmp10	0.404046
Tiam2	0.40399
Ripk2	0.403649
Lsg1	0.403644
Notch2	0.403552
Baz1a	0.403466
Kctd5	0.403387
Hnrnpa0	0.403333
Ankrd29	0.403234
Nrn1	0.403184
Atp11a	0.403144
Cd40lg	0.403103
Mcm5	0.403095
Dnmt3a	0.402989
Trp53rk	0.402984
Ccdc102a	0.402959
Homer1	0.402931
Otud7b	0.402906
Ak1	0.402789
Lonrf1	0.402547
Rpf2	0.402545
Yeats4	0.402465
Rnpc3	0.402363
a	0.402321
Mier1	0.402282
Ccdc124	0.402178
4632434I11Rik	0.402147
Aldh3a1	0.402146
Kpnb1	0.402022
Il1rap	0.402014
2810408I11Rik	0.401927
Eif4h	0.4017
Aurka	0.401622
Nop16	0.401513
Prkcsh	0.401455
Abce1	0.401006
Plbd2	0.400964
Icos	0.400883
Urm1	0.400882
Sstr2	0.400758
Kcna3	0.400077
Ticrr	0.40002
Tomm70a	0.399827
Stc2	0.399817
Pex11a	0.399765
Ndufs8	0.399659
Pex12	0.39963
Ppid	0.399615
Fbxw8	0.399565
Rab12	0.399486
Amfr	0.399421
Rnmtl1	0.399365
Eid3	0.399324
Rbm47	0.399303
Ncl	0.399195
Tm9sf2	0.398752
Hsd17b12	0.398682
Lats1	0.398678
6430562O15Rik	0.398327
Gorasp2	0.398272
Smyd2	0.398171
Cd9	0.398104
Aldh7a1	0.398098
Fubp1	0.398091
Gm5415	0.398024
Noc4l	0.397923
Tars	0.397878
Cd3eap	0.397865
Polr2k	0.397826
Nlrp1b	0.397645
Cct5	0.397237
Lrrtm2	0.397048
Stt3a	0.396883
Grap	0.396811
Nova2	0.396638
Zfp191	0.396511
2610318N02Rik	0.396496
Nvl	0.396465
Cks2	0.396341
Timm9	0.396284
Gm4832	0.396177
Nop56	0.396151
Rraga	0.396108
Hras1	0.395878
AI836003	0.395857
Myo1g	0.395851
Gpr174	0.39585
Fbl	0.395766
Elfn1	0.395749
Cth	0.395602
Cdca5	0.395481
Mrpl19	0.395436
Muc1	0.395296
Tceb3	0.395215
Phgdh	0.395203
Trmt10c	0.395183
Snai3	0.394997
Spcs1	0.394979
Mrpl17	0.394938
Zbtb41	0.394926
Usmg5	0.394633
U2af2	0.394627
Ddx52	0.39457
Chchd4	0.394533
Lrrc3b	0.394532
Siglecg	0.394278
Fam96b	0.394163
Npnt	0.3941
Ccar1	0.393959
Slc39a8	0.393893
Zbp1	0.393722
Ssb	0.393686
Arl14ep	0.393664
Shisa2	0.393582
Trim8	0.393543
Themis2	0.393527
Tlr4	0.39343
Gins2	0.393427
Gm5615	0.393361
Ly6g5b	0.393267
Apmap	0.393222
Clasp1	0.392979
Prpf38a	0.392965
Gm5483	0.392862
F2r	0.392818
Ifitm2	0.392721
3110001I22Rik	0.392668
Pdcd7	0.39255
Hspa9	0.392507
Bub1	0.392483
Zfand5	0.392448
Mapk1ip1l	0.392391
Stat5a	0.392372
Tagln2	0.392329
Stab1	0.392249
Dnajc2	0.392007
Cxcr2	0.391959
Nup62	0.391911
Rrp36	0.39191
Hs2st1	0.391779
Yes1	0.391643
Slc18a2	0.39153
Trib1	0.391512
Ahctf1	0.391502
Nrbf2	0.391483
Nptn	0.391263
Psmd13	0.391147
B4galnt4	0.391107
Rad54l	0.391063
Top2a	0.39097
Tmem35	0.390824
Taf5l	0.3907
Nxt1	0.390681
Cenph	0.390609
Wbp4	0.390608
Neil3	0.390353
Thg1l	0.390286
Bend3	0.390002
Thop1	0.389922
Espl1	0.389918
Timm8a1	0.389838
Cltc	0.389835
Mrps2	0.389815
Ranbp1	0.389656
Zfp618	0.389623
Slc16a1	0.389608
Gm766	0.389598
Dusp16	0.389359
Sub1	0.389356
Nfkbid	0.389279
C1qbp	0.389267
Ppp1r7	0.389236
Zfp715	0.389222
Tspan5	0.389143
Zfp750	0.389141
Thumpd1	0.389122
Myo1f	0.389103
Anln	0.388995
Wiz	0.388991
Lmna	0.388917
Tcp11l1	0.388744
Sirt2	0.388532
2310008H09Rik	0.388524
Extl3	0.388363
Bmi1	0.388293
Hspd1	0.388115
Ddx39	0.387655
Nr4a3	0.387579
Pithd1	0.38756
Cysltr1	0.387415
Lcat	0.387406
Eif3g	0.387372
Psmc4	0.387318
Fdx1l	0.387258
Rgs2	0.387024
Gpr89	0.38701
Pkp4	0.386783
2410016O06Rik	0.386666
Tfrc	0.386567
Rab5a	0.386357
Nmnat1	0.386293
Prnd	0.386034
4930555G01Rik	0.385953
Yars2	0.385877
[truncated: 10,743 more rows]

## Sheet: IL4 correlating genes
Gene Symbol	Similarity
Il4	1
Il13	0.950455
Penk	0.890949
4930506M07Rik	0.884649
P2ry1	0.88344
Rxra	0.874983
Cacna1c	0.859515
Il5	0.857395
Pparg	0.852523
Htr1b	0.845311
Nts	0.837869
D430036J16Rik	0.833087
Ak2	0.82907
Prdm8	0.828681
Gata3	0.825461
Enam	0.821111
Pacsin2	0.819095
D430041D05Rik	0.815744
6430571L13Rik	0.814837
Tiam1	0.811365
Specc1	0.800466
Cxcl2	0.796708
Ctbp2	0.796034
Epcam	0.792047
Tead1	0.791244
Fam84a	0.79027
Usp44	0.785945
Dlc1	0.785142
Adap1	0.785003
Abcc1	0.783514
Gm8773	0.783199
Rnf128	0.78284
Cst6	0.782149
Ctsz	0.779119
Prkcdbp	0.777018
Cxcl3	0.775322
Edn1	0.773806
Hemk1	0.772561
Fam46a	0.771885
Kcnk5	0.769767
Tnfaip8	0.769589
Nrgn	0.768639
Samsn1	0.768336
Fzd6	0.768188
Pou4f1	0.767019
Stra6	0.762704
4930412O13Rik	0.762291
Sv2c	0.758154
Tnfsf8	0.75746
Cst3	0.756776
Fam43a	0.755858
Ccr4	0.754832
Sema3e	0.752467
Aldh1a3	0.750899
Egfr	0.744661
Oaf	0.743137
Igsf9b	0.742833
Nrn1	0.741443
Hmgb3	0.739749
Lin7a	0.738569
Wtip	0.736967
Fn1	0.736222
Stfa3	0.735781
Prkcsh	0.735727
Mlf1	0.735381
AI836003	0.733719
Dennd5a	0.733132
Lman2	0.731971
Elovl4	0.730944
Igf2	0.729204
Ophn1	0.728302
Csn2	0.727675
Dlk1	0.726873
Ism1	0.726705
Dagla	0.725824
Thbs1	0.725689
Clcn5	0.725508
Rai14	0.725397
Hells	0.724646
Zdhhc21	0.722228
Rpn2	0.722127
Ccr8	0.720881
Ppp1r26	0.719551
Cdc42bpa	0.718197
Olr1	0.715993
C1ql3	0.715381
Sypl	0.714165
Fam57a	0.71411
Nrp2	0.714045
Shroom3	0.713925
Eda2r	0.713722
Osr2	0.713656
Npnt	0.712579
Arl14ep	0.712202
Rnd3	0.711943
Il6	0.711547
Acsl6	0.71036
Sorcs1	0.709726
Hc	0.708468
Pla2g4c	0.707518
Tgfb1	0.706762
Fignl1	0.706755
Trpa1	0.705232
Cdh2	0.705064
Rnf152	0.704376
Nek6	0.7038
Hbegf	0.702993
Ddost	0.702748
Cd44	0.701861
Ankrd34b	0.70138
Akr1c12	0.701254
Otx1	0.700978
Il31	0.700949
Nrp1	0.700884
Adora2b	0.700737
Cd82	0.700341
Fam108c	0.699582
Neo1	0.699492
Dmxl2	0.698474
Itgb1	0.696358
Unc5b	0.696328
Phlda1	0.695596
Havcr2	0.694506
Mapre2	0.693846
Il1r2	0.693401
Prdx4	0.692926
Reep3	0.69283
Snx9	0.692602
Pros1	0.691906
Svip	0.691795
Grin2d	0.691559
Cpeb1	0.691155
Timd2	0.68995
Dusp3	0.689699
Adam8	0.68914
Gm19510	0.688512
Il10ra	0.688381
Hunk	0.688298
Hs3st1	0.68825
Sema3a	0.687243
Kcnj12	0.686369
Cnnm1	0.686254
D630039A03Rik	0.68583
Anxa3	0.685348
Fam171a1	0.684861
Dgkk	0.684751
Cth	0.684343
Nova2	0.684233
Ptprg	0.68366
Wisp1	0.683492
Areg	0.682883
5430427O19Rik	0.682819
Spint1	0.682818
Wisp3	0.682703
Slco4a1	0.682694
Col6a2	0.681666
Ap1s3	0.681611
Msc	0.681581
Fabp5	0.681553
Inf2	0.680906
St3gal1	0.679359
Ptpn7	0.67916
Cdca7	0.678911
Cdk6	0.678488
Ndst3	0.67814
Gzmb	0.677117
Itpripl2	0.676447
Wwc1	0.676108
Ninl	0.675718
Orc1	0.675309
Arhgap6	0.674087
Atp9a	0.67394
Ndfip1	0.673435
Ryk	0.673262
Chek1	0.673262
Lilrb4	0.672892
F2rl2	0.672581
Fancf	0.672253
Nudt4	0.672068
Flrt3	0.671969
Slc17a6	0.671951
Htr2a	0.67112
Bace2	0.671031
Zcchc10	0.670341
Cuedc1	0.670272
Ar	0.669728
Epn2	0.669516
Eml1	0.669362
Pdcd1lg2	0.668753
Tjp2	0.668707
Jak2	0.6685
Dusp6	0.668472
Rapgef5	0.668346
D330045A20Rik	0.668241
Ell2	0.668112
Bex1	0.668044
2008-09-01	0.668029
Stfa2	0.667761
Casp3	0.667428
Col5a1	0.666563
E2f1	0.666489
Adamtsl3	0.666127
Stc1	0.666034
Irf5	0.665879
Il3	0.665553
Ubl7	0.665422
Cpe	0.66458
Mid2	0.664407
Limd1	0.664329
Exo1	0.663702
Syn2	0.663559
9430020K01Rik	0.663552
Crtap	0.663415
Tpbg	0.663294
Itpr1	0.663233
Gnai1	0.662061
Chaf1a	0.662058
Csf2	0.661538
Entpd3	0.661532
Cish	0.661525
Gclm	0.661437
Ppp2r3a	0.661085
Slc39a6	0.660975
Gyk	0.660835
AI414108	0.660135
E030011O05Rik	0.659542
Trip13	0.658421
Etfb	0.657812
Mcm6	0.657381
Me1	0.657143
Ptgs2	0.656409
Mcm10	0.656023
Pdk4	0.655935
Car8	0.655178
Mmp10	0.654903
Cttnbp2nl	0.654518
Gm5127	0.652892
Cass4	0.652843
Cdc6	0.652068
Scg2	0.651707
Pth	0.651354
Slc1a2	0.65131
Tmem238	0.651216
1500012K07Rik	0.650457
Zfp518b	0.650355
Rbpj	0.649818
Ccl1	0.649768
Srxn1	0.64964
Atp11a	0.649476
Marcks	0.649185
Dcbld1	0.648155
Itgav	0.647849
Epdr1	0.647396
Mycl1	0.647308
Crlf2	0.647144
Csf2ra	0.647053
Fat4	0.646136
Nlrp3	0.645157
Ncstn	0.644873
Epha2	0.644858
Nqo1	0.644855
Anp32e	0.644511
Spcs3	0.644205
Zfp296	0.643527
Ripk4	0.643417
Grb10	0.643384
Asb2	0.643106
Aard	0.642965
Cdc45	0.64264
Enthd1	0.642269
Mei4	0.641958
Alg8	0.641302
Gm2663	0.640961
Tnfrsf4	0.640681
Scin	0.640332
Usp27x	0.639718
E2f3	0.639602
Sowahc	0.639469
Il12rb1	0.638499
Zc3h12c	0.638425
Tigit	0.636212
Skp2	0.636205
9430037G07Rik	0.635107
Mapkapk2	0.635043
Enah	0.634629
Akr1c18	0.634409
Plbd2	0.63419
Trib1	0.634116
Fhl2	0.634095
Casp1	0.633773
1810009J06Rik	0.633694
Il24	0.633423
Ptger2	0.633346
F2r	0.633028
Rad50	0.633027
Akr1c13	0.632199
Nov	0.631982
Tinagl1	0.631967
Mcm5	0.631749
Col6a1	0.631437
Clstn1	0.631383
Psat1	0.631235
Inhba	0.630998
Clhc1	0.630898
Mybl2	0.630692
Gspt2	0.62904
Pbk	0.62902
Evi5	0.628547
Pter	0.628224
D10Bwg1379e	0.628221
Lman1	0.627861
Gm5416	0.627607
Zcchc3	0.627388
Rragd	0.627271
Sema4b	0.627244
Mcm3	0.626683
Ccnd2	0.626514
Chn1	0.626155
Gzma	0.626108
Gp49a	0.625983
Notch2	0.625508
Tfdp1	0.624784
Coq7	0.624735
Plxdc2	0.623864
Nkain1	0.623821
Iqsec2	0.6236
Wee1	0.623546
Slc39a4	0.622262
Fam198a	0.621805
St3gal5	0.62179
Plxna1	0.621735
AI662270	0.621584
Serpinb6b	0.621188
Grp	0.620947
Cst7	0.620136
Eea1	0.619908
Papss2	0.61985
Ubxn8	0.619043
Nucb1	0.617628
2700081O15Rik	0.617524
Ampd2	0.617211
Ccne2	0.617204
Cenpi	0.616756
Tnp2	0.61624
Rnf19b	0.615949
1700086O06Rik	0.615033
8430427H17Rik	0.614669
Stc2	0.614624
B3galt5	0.612527
Cobll1	0.612458
Il2ra	0.612249
Nos1	0.611488
Perp	0.611457
Dna2	0.611273
Lsm6	0.611261
Wdhd1	0.611259
Slc13a3	0.611029
Lrr1	0.610589
2010005H15Rik	0.610588
Ptpn13	0.610539
Kif15	0.609679
Trim71	0.60957
Ezh2	0.609281
Nucb2	0.60907
B4galt5	0.609012
Phgdh	0.608665
Fsd1l	0.608495
Trpm6	0.60815
Hap1	0.608138
Dhrs9	0.607804
Gins2	0.607728
Larp1b	0.607599
Pole	0.607246
Gm16894	0.606231
Ssr2	0.606227
Ksr1	0.606081
Lpgat1	0.605792
Lrp8	0.60564
Pigg	0.604408
Spry2	0.603699
Slc17a8	0.603584
Ero1l	0.603568
Kcnmb1	0.60332
Bcam	0.603038
Ppib	0.602188
Socs2	0.601967
Fbxw8	0.601753
Ankrd33b	0.601696
Lig1	0.601667
Rapsn	0.600997
Gm9895	0.600342
Dab2ip	0.600056
Armcx4	0.599947
E030024N20Rik	0.599792
Zdhhc2	0.59928
Lnx2	0.599143
Ebi3	0.598514
4930520O04Rik	0.598043
Dhfr	0.598033
Gfra2	0.597816
Cryba4	0.597177
Mdfic	0.597055
Cdk1	0.596874
Zfp462	0.596693
Mtch1	0.595825
E2f7	0.595746
Batf3	0.595507
Naf1	0.595338
Sox21	0.595241
Ggh	0.59501
Trim9	0.595
Myo1c	0.594591
Mboat1	0.594372
Sobp	0.594112
Gm5065	0.5936
Dio2	0.593471
Mlkl	0.593459
Elmo2	0.593304
Mid1ip1	0.593121
Tnfsf13b	0.592989
Mcm2	0.592854
Gprin3	0.592631
D630045J12Rik	0.592223
Ccdc112	0.592122
Slfn10-ps	0.592102
Tmx1	0.592027
Rad54l	0.591937
Bcat1	0.591857
Metap2	0.591793
Tnfsf11	0.591452
Lgi1	0.590752
Zeb2	0.590695
Hn1l	0.590528
Rad51	0.590401
Ncapg2	0.590393
Pvrl3	0.589691
Amotl2	0.589512
Fam135b	0.589231
Socs1	0.588684
Akap1	0.58868
Fstl4	0.588211
Adam10	0.587929
Serf1	0.587701
Tmem48	0.587286
Vma21	0.586998
Il19	0.586866
Ccr1	0.586668
Gca	0.58656
Src	0.58643
Stx3	0.586157
Nespas	0.585882
Erp29	0.585711
Asns	0.585339
Casp4	0.585321
Canx	0.585197
Myh10	0.585154
BC030867	0.585145
Gm5483	0.585115
Uhrf1	0.584964
Plxnb2	0.584957
E2f8	0.584515
Cysltr1	0.584448
Gzmc	0.584443
Nln	0.584193
Hilpda	0.584019
Atp1a1	0.583974
Ptgdr	0.583634
Rab11fip1	0.583361
F730043M19Rik	0.583192
Tbc1d2	0.582985
Pde12	0.58296
Cdkn2b	0.582509
Reep5	0.582441
1700001L05Rik	0.582354
Ucp2	0.58193
Ftl1	0.581438
0610010F05Rik	0.581206
S100a3	0.580571
Lama5	0.580084
Cebpg	0.579927
S100a5	0.579659
Zfp827	0.579565
Pkd2	0.579299
Tipin	0.579121
Zfp862	0.578637
Kcnc3	0.57787
Gm6981	0.577634
Tex15	0.577519
Srcrb4d	0.577473
Tenm1	0.577354
Snx24	0.576848
Slc7a8	0.576587
Pdzk1ip1	0.575954
Pcdh19	0.575754
B3galt6	0.575432
Sval1	0.574941
Fam83g	0.57456
Pdia5	0.574502
Tnfsf15	0.574244
Phldb1	0.574053
Wnt11	0.573626
Zbtb46	0.573432
Tusc3	0.57319
Il1a	0.573085
Ergic1	0.57293
Runx2	0.572709
S100a1	0.572392
Txndc5	0.572305
Nek8	0.57209
Myo16	0.57208
Nav1	0.572002
Ssr4	0.571884
Icam5	0.571871
Ptgir	0.571671
Tarm1	0.571549
Pdzk1	0.571339
Siglec5	0.571286
Foxq1	0.571259
Plp2	0.571169
Nfil3	0.570985
Ptger4	0.570847
Gm5122	0.570683
S100a6	0.570578
Six1	0.57047
Pkd1l3	0.569874
Efhd2	0.56984
Sprr1a	0.569607
C77080	0.569431
Ccdc115	0.569215
Stt3a	0.569134
Trim16	0.569025
Tmem109	0.568884
Tmed10	0.568776
Rrm2	0.568528
Frzb	0.567577
Tnfrsf8	0.567551
Ahcyl2	0.567281
Prep	0.5668
Shcbp1	0.566565
Slc2a6	0.566563
Fam71b	0.56629
Shc3	0.566203
Thy1	0.565528
Sema6a	0.56536
3000002C10Rik	0.564329
Fndc3b	0.56419
Zfp503	0.564173
Lrrk2	0.563873
Slc30a2	0.563486
Hnrpll	0.563096
Bsg	0.562934
Fsbp	0.562798
Slc9a5	0.562739
Tnfsf14	0.562623
Rpn1	0.562102
Sdf2l1	0.561944
Gins1	0.561905
Orc6	0.561896
1700030J22Rik	0.561882
Pgrmc1	0.561812
Slc38a10	0.561709
2010111I01Rik	0.561572
Epb4.1l4b	0.561469
Dhx34	0.561459
Ccdc33	0.560759
Mfrp	0.560717
Nme6	0.5606
Hmox1	0.56058
Elp2	0.560269
Atf3	0.56017
Zfp334	0.560108
Skida1	0.560044
Nuf2	0.560038
Ptprs	0.560032
2810417H13Rik	0.559769
Nkd2	0.559766
Ehd2	0.559699
Sod1	0.559567
B3galtl	0.559517
Diap3	0.559267
Ttk	0.559223
Lhx2	0.559114
Eif3c	0.559108
Faim3	0.559017
Melk	0.558715
Pabpc4	0.558595
Sf3b5	0.558459
Ccnf	0.558446
Txn1	0.558418
2008-03-01	0.558315
Plcb1	0.558286
Crybg3	0.557923
Tube1	0.557827
Rad51ap1	0.556911
Cyp20a1	0.556185
Blmh	0.556168
Fgf2	0.556148
Dctd	0.556109
Far1	0.555682
Coro2a	0.55564
St6galnac2	0.555421
Tnip3	0.555378
Syngr2	0.555329
Gpt2	0.554891
2011-09-01	0.554769
St7	0.554629
D16Ertd472e	0.554578
Ctage5	0.554278
Fam115c	0.553844
Cuzd1	0.553588
Fermt2	0.55343
Eaf1	0.553188
Elp6	0.553176
Ccl22	0.553155
C1qtnf5	0.553108
Med7	0.552742
Mmp3	0.552618
Plagl1	0.552372
Csf1	0.552321
Gsto1	0.55155
Serpina3h	0.551479
Ptdss1	0.551352
Atic	0.55128
Arhgdig	0.551269
E2f4	0.551244
Npas2	0.550986
1700018L02Rik	0.550848
Ctdnep1	0.550135
Lpin3	0.550062
Tnfrsf9	0.550006
Rap1gap	0.549734
Hspa2	0.549358
Fndc3a	0.549278
Klf12	0.549025
Gpc4	0.548949
Zfpm1	0.548795
Pebp1	0.548739
Kazn	0.548555
Zfp870	0.548403
Cask	0.548387
Slmo1	0.548241
Pold3	0.548088
Atoh8	0.547951
Nipa2	0.547904
Mapk12	0.547713
Tm9sf4	0.547546
Jdp2	0.547525
Emc7	0.546815
Gas2l1	0.546628
Kcna3	0.546212
Nckap1	0.545776
Ercc6l	0.545428
Rnaseh2b	0.545303
Klhl32	0.545158
Gm2a	0.545068
Plcd1	0.54506
C3	0.544818
Manf	0.544815
Cyp11a1	0.544583
Serpine1	0.54445
Tnc	0.54439
Kdelr2	0.544047
Smyd2	0.543767
Camk2d	0.54345
Slc12a2	0.543405
Sdc1	0.543305
Fdx1l	0.543037
Ept1	0.542994
Ifih1	0.542697
Gm5615	0.542205
Kctd15	0.542147
Ncapg	0.542033
Cyfip1	0.542014
Dscc1	0.541208
Rad54b	0.540842
Tsen54	0.540834
Uxs1	0.540615
Hspa4	0.540578
Fnip2	0.540408
Plec	0.540269
Arc	0.540255
Fndc3c1	0.540114
Creb5	0.540041
Rad23b	0.539838
1700034P13Rik	0.539776
Mgat2	0.539722
2810408I11Rik	0.539674
Acsl5	0.539545
Pcmt1	0.539367
Frmpd1	0.539309
Mcoln2	0.539276
Frem2	0.539235
Clspn	0.539223
Bcl7c	0.539109
Psmd5	0.538849
Mif	0.538813
5330426P16Rik	0.538623
Thoc3	0.538505
4833419F23Rik	0.538332
Slc4a7	0.538072
Got1	0.538071
Krt6b	0.537988
Rabl2	0.537969
BC004004	0.537949
Akt1	0.537817
Kif4	0.537585
Alcam	0.537397
Lif	0.537313
Insm1	0.537009
Rabl3	0.536969
Lrrc32	0.536558
Gfi1	0.536312
Cd200	0.536138
Kif2c	0.536027
2610019E17Rik	0.535896
D430020J02Rik	0.535817
Mbnl3	0.535669
Synpo	0.535582
Ddx20	0.535282
Gtdc2	0.535111
Ehd1	0.535102
Stt3b	0.534821
4930429B21Rik	0.534639
Afg3l1	0.53417
Rcl1	0.534167
9330179D12Rik	0.534106
Zfp703	0.534087
Fkbp11	0.533859
Ctnna1	0.53327
Fkrp	0.533204
Xylb	0.533104
Kcnq5	0.533077
Dcbld2	0.533036
Emr1	0.532172
Rnf219	0.532158
Rbbp7	0.532156
Chchd6	0.531919
Gltpd1	0.531743
Batf	0.531636
Gpd2	0.531578
Prss56	0.531528
Cpne6	0.530855
Kntc1	0.530809
Hsp90b1	0.530799
Btbd19	0.530745
Obsl1	0.530721
Fam185a	0.530702
Xpot	0.530685
Txnl4a	0.530206
Whsc1	0.530067
Ctdspl	0.529991
Etv6	0.52994
Gas8	0.529929
Cks1b	0.529737
Gm13807	0.529599
Gm13889	0.52938
Anxa2	0.529356
Ltbp1	0.529346
Anln	0.52933
Apmap	0.529132
Klf5	0.529098
Txnrd1	0.529075
Tet2	0.52894
Mtdh	0.528787
Angptl4	0.528722
Serpina3i	0.528415
Tmbim1	0.528354
Anxa1	0.528238
Mki67	0.528187
Ticrr	0.527993
Entpd7	0.52791
Hipk2	0.5278
Lap3	0.527702
Cops7b	0.527467
Paqr4	0.527274
Plekhg4	0.527165
C330027C09Rik	0.527031
Aspm	0.526953
Dtl	0.526935
Nedd1	0.526772
D430019H16Rik	0.526565
Arhgap21	0.526491
Plscr1	0.52642
Degs1	0.526133
Zwint	0.526005
Thbs4	0.525605
Npy	0.52531
Clec7a	0.525279
Osbpl3	0.524756
Stfa2l1	0.524692
Gpam	0.524647
Ostc	0.524625
Tmtc4	0.524616
Mt1	0.524586
6430562O15Rik	0.524293
Ifitm2	0.524039
Elmo1	0.523806
Actr3b	0.523749
Slc25a33	0.523694
Nefh	0.523584
Zbtb32	0.523072
Ptrh2	0.523071
Ptgs1	0.522926
Plod3	0.522699
P2rx5	0.522286
Tmem158	0.522112
Plagl2	0.522057
Cdhr3	0.521712
Zik1	0.521674
Ldha	0.5216
Gcnt4	0.521132
Abi2	0.521033
Kif18b	0.521024
Ckap2l	0.520908
Cilp2	0.520643
Sgol1	0.520515
Ankrd36	0.520425
Tmx3	0.520069
Prpf8	0.52
Notch1	0.519814
Bub1	0.519736
Fbxo45	0.519702
Tnfrsf18	0.518597
Mcf2l	0.518536
Fen1	0.518233
Anxa4	0.51823
Acsl1	0.518078
Car12	0.517769
Ddb1	0.517731
2900026A02Rik	0.517659
Serpinb9	0.517596
Prim1	0.517543
Tdrd7	0.517472
Tmppe	0.51739
Top2a	0.517352
Irak1bp1	0.517018
Marveld2	0.516911
Acbd7	0.516807
Ctnnd2	0.516786
Map2k4	0.516712
Tmtc3	0.516557
Lancl3	0.516409
Xk	0.516373
Nme1	0.516347
Cinp	0.51633
Dnmt3a	0.516272
Agpat5	0.516235
Atad5	0.516088
Tanc2	0.515819
Gas2	0.515752
Tcp11l1	0.515735
Cebpb	0.515536
Pole3	0.515507
Kel	0.515385
E430025E21Rik	0.515313
Cenph	0.514661
Sms	0.514302
Golt1b	0.51424
Cad	0.514084
Ppfibp2	0.513999
Pus1	0.513967
Ccnb1	0.513622
Ppp4r4	0.513399
Tsn	0.513322
Pdia6	0.513052
Topbp1	0.512987
Cacna1s	0.512955
Slc25a13	0.512901
Dip2c	0.512824
Il9	0.512751
Ralgds	0.51267
Snx25	0.512669
Ina	0.512648
Ano1	0.512353
Fam20b	0.512012
Rdx	0.511826
Cenpv	0.511603
Grtp1	0.511601
Podxl	0.511445
Slc19a2	0.511251
Tmed2	0.511023
Git1	0.510924
Prelid2	0.510408
Sla	0.510111
Ugt1a7c	0.510037
Tfrc	0.510034
Basp1	0.509913
Ppia	0.509803
Pkp2	0.509659
Tgm2	0.509599
Espl1	0.509531
Rmi2	0.509382
Bcar1	0.509249
Fastkd3	0.509086
Mt2	0.508832
9530068E07Rik	0.508807
Kcnn4	0.508608
Atmin	0.508248
Qsox2	0.508168
Cldn12	0.508108
Hcfc1	0.508073
Nsg1	0.508028
Lsm2	0.507962
Ptrh1	0.507716
Fgf18	0.507704
Igfbp7	0.507346
Mtx2	0.507329
B3gnt2	0.507135
Pigu	0.50693
Ndrg1	0.506897
Fem1b	0.506679
Rad18	0.506656
A930001A20Rik	0.506349
Tpm1	0.506314
Uchl1	0.506273
Nbl1	0.506215
Lipg	0.506177
Zmiz1	0.505919
Rdh10	0.505864
Serpina3n	0.505814
Farp1	0.505787
Setbp1	0.505754
Slc4a4	0.50556
Rfc5	0.505554
C130050O18Rik	0.505465
Gpr89	0.505376
Sel1l	0.505369
Enox1	0.505326
Nrp	0.504993
Ccdc50	0.504954
Tusc1	0.504933
Bag2	0.504855
2610318N02Rik	0.504805
Fam115e	0.504781
Utf1	0.504758
Nfyb	0.504725
Sln	0.504352
Pdss1	0.503652
Capg	0.503649
Ccdc116	0.50289
Zfp280b	0.502724
Elof1	0.502531
Mms22l	0.502398
Peg10	0.502312
Sprr2a1	0.502154
Zbtb7c	0.502102
Hspa9	0.502014
Abtb2	0.501995
2005-09-01	0.50194
Pard3b	0.501934
Ak4	0.501913
Bcl2l1	0.501871
Arhgap17	0.501698
Pm20d2	0.50155
Cd80	0.501261
Slc35e4	0.500954
Olfr60	0.50094
Pofut2	0.500923
Txlna	0.500484
Spire1	0.500437
Lingo3	0.500274
Dock3	0.500004
Syce2	0.49956
Nek7	0.49952
Gjb2	0.499403
Ran	0.499366
Dusp18	0.499287
Xist	0.499285
Mtmr7	0.499183
Rcn1	0.499057
Pmpca	0.499054
Zfp91	0.498997
Egr4	0.498819
Esco2	0.498762
Gm13498	0.498664
Cnih4	0.49837
Ccna2	0.498365
Shmt1	0.498268
Lctl	0.498259
Caskin2	0.498213
Ccr3	0.498118
2010204K13Rik	0.497969
Gldc	0.497843
Kif23	0.497665
Cenpn	0.497643
Zswim7	0.497526
Bmpr1a	0.497109
Mcm4	0.497086
Nomo1	0.497051
2010-03-01	0.497043
Mst1r	0.497041
Tmem237	0.49685
Prr5	0.496627
Stbd1	0.496303
Ptrf	0.496255
Mrps18a	0.496126
Cd81	0.495521
Atxn1	0.49543
Pdcd6	0.495204
Mettl1	0.495121
Col18a1	0.495115
Gabpb2	0.495103
Ifitm6	0.495062
Zwilch	0.495032
Tmem29	0.494931
Nudc	0.494919
Pom121	0.494874
Spp1	0.494747
Oit3	0.49473
Itgae	0.494721
Tdpoz4	0.494572
Fut4	0.494524
Syt5	0.49448
Heg1	0.494407
Oxsr1	0.494088
Noc4l	0.494043
Sgms2	0.493949
Mrpl35	0.493917
Ska1	0.493851
Traip	0.493799
Lgals3bp	0.493712
Cdc20	0.493523
Tk1	0.493486
Xirp1	0.493208
Smc2	0.49314
Gm5643	0.493051
Fam107b	0.49304
Cd274	0.493026
Chpf	0.493019
Ergic2	0.492928
Acvr1	0.49269
Adc	0.492396
Fkbp2	0.492352
Lrrc49	0.492217
Tnfrsf11b	0.492144
Rcc2	0.49196
Abcb6	0.491866
Id1	0.491836
Eme1	0.491511
Siva1	0.491418
Tmed9	0.491221
Trim35	0.491068
Slc35d3	0.491039
Apitd1	0.490863
Myo1d	0.49065
Dlgap3	0.490511
Gatad1	0.490327
Id2	0.490319
Arid3a	0.490234
Dnase1l3	0.490139
1190005I06Rik	0.48998
Ppil1	0.489979
Wrb	0.489794
Stx11	0.489764
Fgd2	0.489706
Hapln1	0.489694
Lrrc8d	0.489616
9430008C03Rik	0.48953
Nppc	0.489443
Kpna2	0.489312
Kif14	0.489229
Immt	0.489123
Ywhae	0.489047
Cdca8	0.488868
Nploc4	0.488855
Bmp2k	0.488662
B430319G15Rik	0.488657
Plk4	0.488575
Snai3	0.488548
Rcc1	0.488265
Slc15a3	0.488124
Polr3h	0.488074
Cenpk	0.487882
Cx3cl1	0.487858
Ywhah	0.487791
Etv4	0.487696
Tkt	0.487688
Slc35a3	0.487614
Jag1	0.487487
Zfp57	0.487127
Tmem194	0.486987
Crabp2	0.486956
Fasn	0.486922
Wnt9b	0.486815
Lgals1	0.486774
Mtx1	0.486727
Nsun2	0.486419
Ssr1	0.486413
Gm10560	0.486173
Ndufa12	0.486023
Rbmx2	0.485801
Rab8b	0.485776
Egln3	0.485687
Srsf9	0.485549
Dsp	0.485538
Il2rb	0.485526
Ammecr1	0.485471
Cyb5b	0.485423
Rn45s	0.485082
Sil1	0.484655
4930599N23Rik	0.484627
Tfcp2l1	0.484442
Gm13251	0.484373
Tceb3	0.484342
Fanca	0.484323
Pou2f2	0.484271
Ahnak	0.484184
Arpp19	0.484162
Srm	0.484019
Brca1	0.483938
Efna5	0.483931
Blcap	0.483911
Tpx2	0.483672
Aen	0.483658
Zc3h7b	0.483571
Troap	0.483511
Pilrb1	0.483499
Dcp2	0.483404
Sfxn1	0.483093
Rif1	0.483067
Rrm1	0.483025
Col15a1	0.48277
Usp14	0.482429
Eps8	0.482289
Cyb5r1	0.482064
Hsd17b12	0.482022
Casc5	0.481838
Tpi1	0.481832
Plekhh1	0.481693
Arcn1	0.481624
Ube2c	0.481447
Gm15760	0.4814
Ocln	0.481253
Ruvbl1	0.481244
Mir684-1	0.48118
Vcl	0.481135
H2-Oa	0.481122
Mthfd1l	0.481112
Nckap5	0.480527
Nup93	0.480481
Lrdd	0.480446
Mrps18b	0.480434
Mrps28	0.480218
Amotl1	0.480103
Ppif	0.4801
Pgd	0.479851
Fam83h	0.47973
Nutf2	0.479434
Ecm1	0.479354
Sik3	0.479295
Mest	0.478921
Serpina3f	0.478833
Slc25a19	0.47883
Mnd1	0.478825
Smyd5	0.478459
Zmat3	0.478365
Stk39	0.478167
Rps27l	0.478083
Lpin2	0.478025
Pithd1	0.477865
Sap30	0.477796
Polr2j	0.477666
Dusp14	0.477544
Kif3a	0.477417
Gna15	0.47735
Gm4858	0.477299
Timm50	0.477297
Coq4	0.477283
Hk2	0.477262
Zfp282	0.477145
Tma16	0.477072
Aurka	0.476753
Ergic3	0.47665
Pkm	0.476648
Fkbp1a	0.476418
Neil3	0.476367
Ercc1	0.476291
Mpzl2	0.476257
Pask	0.476239
Ly96	0.476203
Ptgfrn	0.475868
Sfr1	0.475864
Oxsm	0.475734
Lonrf3	0.475688
Eif3b	0.475652
Timm22	0.475575
Rilpl2	0.475475
Glt25d1	0.475387
Cdkn2a	0.475257
Sf3a1	0.475215
Mapk13	0.475154
G3bp1	0.475148
Mgat1	0.474773
Ncs1	0.474751
Pfdn1	0.474651
Pop1	0.474573
Tmem97	0.47457
Gfod1	0.474402
Tmem209	0.474398
Alg11	0.474371
Crip2	0.474213
Dhrs13	0.474176
Ormdl2	0.474161
Aurkb	0.474032
Tomm40	0.47376
Gm13154	0.47368
Hip1	0.473646
Erlin1	0.473481
Nudcd2	0.473445
Snap25	0.473421
2002-09-01	0.473337
Frrs1	0.473336
Srgn	0.473255
Dut	0.47304
Atf6	0.473005
Plxnd1	0.472996
Ctsh	0.472977
Lrpprc	0.472941
Mphosph6	0.472684
Hipk3	0.472644
Gm16907	0.472539
Cdkn1a	0.472222
Recql4	0.472098
Usp39	0.472061
Ydjc	0.471905
Aimp2	0.4715
Faf2	0.471421
Cyba	0.471354
Fzd9	0.471214
Asph	0.471054
Rbm3	0.470926
Cpd	0.470828
Slc36a4	0.470449
Sphk1	0.470406
Emilin2	0.470152
Ggt7	0.470046
Nus1	0.469976
Atp2b1	0.469857
Slc15a4	0.469614
Gpr68	0.469582
Nup85	0.469568
Spag5	0.469556
Grap	0.469508
Hist1h2be	0.469354
Tarbp2	0.469238
Noc2l	0.469166
Mctp1	0.469041
Gzmd	0.468888
Pcyox1l	0.468764
Creld2	0.468722
Timm8a1	0.468634
Srgap3	0.468545
Cenpe	0.468502
Ndfip2	0.468436
Fert2	0.468426
Siah1b	0.468136
Chtf8	0.46793
Slc43a3	0.467796
Fam129b	0.467701
Axl	0.467459
Tmem216	0.46715
Igfbp5	0.467102
Eif4ebp1	0.466889
Gar1	0.466885
Chac1	0.466714
Arxes2	0.466694
Tmem33	0.466544
Tmem132a	0.466499
Snhg6	0.466495
Pard3	0.466464
Prkar2a	0.466464
Ruvbl2	0.466426
Ect2	0.466317
Zfp608	0.466232
Ndrg4	0.466076
Pycr1	0.465972
Stau2	0.465866
Gm5077	0.465733
Srd5a1	0.46564
Tmed7	0.465573
Enpep	0.465202
4932438H23Rik	0.465136
Olfr701	0.465042
Samd4	0.464468
Arl1	0.464462
Slc1a5	0.464207
Shmt2	0.4642
Inppl1	0.464056
Mettl6	0.463901
Sec61b	0.463892
Pomt2	0.463803
Nek2	0.463746
Cd83	0.463737
Lsm7	0.463688
Rab39b	0.463562
Glud1	0.46353
Aebp2	0.463129
Cep55	0.46312
G6pc3	0.463042
Ube2l3	0.46274
Fam171b	0.462706
Gtf2h3	0.46259
Stk32c	0.462559
Cyb561	0.46252
Arl6ip6	0.462472
Rassf8	0.462448
Trat1	0.462266
Raver1	0.462114
F11r	0.46206
Cyp27b1	0.461952
Rgs1	0.461952
Sema4c	0.461818
Ncbp2	0.461805
Mrpl1	0.461576
Psmd7	0.461564
Lacc1	0.46154
Seh1l	0.461538
Lrrc59	0.461536
Gucy2e	0.461534
Rrp1b	0.461478
Dixdc1	0.461382
Arpc1a	0.461133
Traf6	0.46091
Gpm6b	0.460873
Zmynd19	0.460813
Cbx5	0.460728
Gm12504	0.460675
Mybbp1a	0.460242
Cd2	0.460134
Rangap1	0.459948
Ash2l	0.459749
Thg1l	0.459737
Dynll1	0.45952
H2afy3	0.459142
Nup37	0.458955
Sec61a1	0.458905
Spin4	0.458881
Ado	0.458814
Cdyl2	0.458806
Slc19a1	0.458692
Pou3f1	0.458652
Depdc1a	0.458384
Prlr	0.458332
Anp32b	0.458119
Eif2b1	0.457902
Cnih2	0.457892
Phlda3	0.457856
Ppap2a	0.457656
Ier3	0.457498
Kcnk6	0.457465
4933425H06Rik	0.457378
Lrfn4	0.457365
Lrrc16b	0.457262
Ankrd29	0.457084
Foxp2	0.456781
Aacs	0.456705
Larp1	0.456697
Myo5b	0.456691
Kctd9	0.456621
Elp5	0.456535
Pelp1	0.4563
C1qbp	0.456217
Slc3a2	0.456206
Rrs1	0.456196
Ranbp1	0.456155
Isg20	0.456141
Sod2	0.456119
4931406H21Rik	0.455981
Prickle3	0.455951
Plcl1	0.455942
Ubl3	0.455815
D17Wsu104e	0.455698
Ccdc88a	0.455657
Alg9	0.455537
Mapkapk3	0.455454
Tnpo1	0.455422
Nup155	0.455303
Agpat6	0.455275
Wars	0.455215
Lekr1	0.455097
Lamc2	0.455058
Bbs12	0.455045
1500009L16Rik	0.45498
Lamc1	0.454944
Agpat4	0.454866
Lrmp	0.454702
Akap11	0.454514
Lmna	0.454431
M6pr	0.454174
Rfwd3	0.454047
Dclk2	0.454028
Syt7	0.454005
Cdk8	0.453904
Map2k3	0.453868
Tub	0.453729
Nbea	0.45362
Dnajc1	0.452957
Cdca5	0.452742
Dynll2	0.452713
Pkp4	0.452707
Gspt1	0.452651
Ptprj	0.452594
Ewsr1	0.452073
H1fx	0.452034
Tgfb2	0.452002
Ifitm3	0.45179
Ybx1	0.451737
Efr3b	0.451619
Dclre1a	0.451565
Glb1	0.451504
Plk2	0.451416
Mcm7	0.451402
Pigf	0.451181
Nap1l1	0.451107
Fbxo48	0.450896
Foxc1	0.450733
Repin1	0.450725
Gstt3	0.450608
Wdr77	0.450597
Paxip1	0.450404
Comtd1	0.450331
Tars	0.45024
Fgl2	0.450147
Tcea1	0.450065
AI504432	0.449834
Dock7	0.449782
Cd70	0.449753
Thop1	0.449722
Agpat9	0.449389
Cit	0.449345
Snx3	0.449233
Spc25	0.449113
Pgrmc2	0.449035
4930513N10Rik	0.449027
Txlnb	0.449005
Eif4g1	0.448965
Cstf2	0.448909
C2cd4b	0.448831
Elovl1	0.448631
Vav3	0.448602
Dab2	0.448585
Mogs	0.448376
Kctd3	0.448112
Dis3	0.448097
N4bp3	0.447792
Rars	0.447734
Tpst1	0.44764
Setd8	0.447625
Scarb1	0.447612
Cacna2d1	0.447592
Gorasp2	0.447439
Napsa	0.447435
Slfn2	0.447417
Nfe2l1	0.447162
Slc6a9	0.447033
Ctnnal1	0.446848
Uqcr11	0.446698
Prpf31	0.446695
H1f0	0.446691
Galk1	0.446654
Trmt10a	0.446392
2004-03-01	0.446248
Psph	0.446149
Armc6	0.445895
Fzd4	0.445461
Slc25a3	0.445321
Prpf19	0.445021
Mrps2	0.44501
Fam195a	0.444902
Msto1	0.44483
Eri1	0.444829
Reep6	0.444723
Cetn4	0.444673
Egfl7	0.444591
Dnajc2	0.444528
2310014L17Rik	0.444516
Ppfibp1	0.444468
Ipo5	0.444376
D730005E14Rik	0.444362
Nop56	0.444175
Ankrd32	0.44405
Mgat4b	0.443691
Ppp1r7	0.443345
Ttc19	0.442956
Mre11a	0.442884
Mrps11	0.442627
Dctpp1	0.442473
Rnps1	0.442413
Znf41-ps	0.442346
Zfyve21	0.44216
Ptrhd1	0.44216
Fancd2	0.442032
Ddx1	0.441985
Abhd14a	0.441962
Nupl1	0.441772
Iqgap3	0.441737
Adcy4	0.441652
Fam162a	0.441574
Rraga	0.441479
AI480653	0.441461
Pcx	0.441367
Pus7	0.441241
Pla2g15	0.44108
Aifm2	0.441054
Ncan	0.441054
Bspry	0.440997
Atp1b2	0.440627
Adamts3	0.440603
Gm5088	0.440094
Urb2	0.440059
Gm13051	0.439906
Pradc1	0.439896
Pspc1	0.439868
Il33	0.439743
Nup160	0.439668
Eif5a	0.439629
Fam135a	0.439602
E430016F16Rik	0.439352
Ckap2	0.439093
Hirip3	0.439042
Grwd1	0.438804
Psmb4	0.4388
6530402F18Rik	0.438686
Znhit1	0.438373
Trappc4	0.43834
Polq	0.438044
Pgm5	0.438026
Sesn2	0.437987
Rrp15	0.43787
Lsr	0.437678
P4hb	0.437495
Cd3eap	0.437331
Slmo2	0.437242
Eml6	0.437099
Hspa1l	0.436893
Zdhhc13	0.436815
Tcerg1	0.436725
Smn1	0.436656
Dusp2	0.43663
Utp20	0.436471
Gm129	0.436435
Slc29a1	0.436371
Il15ra	0.436215
Vim	0.43613
Bbs5	0.436119
H2afx	0.436029
Ccnb2	0.435932
Tacc3	0.43587
Bcap31	0.435541
Echdc2	0.435501
Anapc4	0.435463
Muc13	0.435232
Gars	0.435147
Apoo	0.435102
Slc35b1	0.43501
Naa50	0.434985
Capza2	0.434974
Haus6	0.434956
Vldlr	0.43495
4930431P03Rik	0.434927
Asf1b	0.434692
Gusb	0.434547
Eprs	0.434514
Eno1	0.43449
Eif4enif1	0.434309
Mrpl19	0.434101
Hnrnpab	0.433969
Cdc34	0.433834
Rab7	0.43365
Snrpb	0.433571
Fbxo30	0.433488
Zdhhc6	0.433381
Ntrk3	0.433263
Hivep3	0.433176
Otud7b	0.433125
Plrg1	0.433121
Hist1h3c	0.432999
4632434I11Rik	0.432999
Rps19bp1	0.432937
Bub3	0.432799
Nfkb1	0.432711
Pim3	0.432503
Hspd1	0.432382
Dek	0.432357
Apex2	0.432332
Epas1	0.432195
Rrbp1	0.432106
Ptpmt1	0.432013
Sf3b4	0.431986
Dmwd	0.431948
Prodh	0.431831
Itk	0.431716
Man1a	0.431678
Calcrl	0.431634
Prmt1	0.431603
Bsn	0.431597
Ubiad1	0.43155
Crls1	0.431517
Tdg	0.431478
Erh	0.4314
Pcgf2	0.431316
Hsd17b7	0.431067
Nr2f6	0.431029
Gsr	0.430626
Qdpr	0.430591
Exosc10	0.430577
Fbxw9	0.430563
Chchd4	0.430542
Pole2	0.430209
Bcap29	0.43016
Timm17a	0.430083
Actl6a	0.430073
Cdca2	0.42993
Stil	0.429872
Dach2	0.429801
Ncrna00086	0.42944
Psmd1	0.429089
Stard13	0.42906
Slc7a1	0.428972
Kif13a	0.428953
Gen1	0.428882
Ccdc80	0.428878
Tomm6	0.428868
Fastkd2	0.428785
Dpagt1	0.428784
Spry1	0.428773
Arhgdia	0.42877
B9d1	0.428509
Rgs16	0.428303
Hmgb1-rs17	0.427992
Lgals7	0.42799
Tbrg4	0.427967
Usp1	0.427966
Mycbp	0.42788
Mapk1	0.427689
Ticam2	0.427617
Gas2l3	0.427597
1700019L03Rik	0.427271
Tlr4	0.427251
Cox6a1	0.427214
Kif11	0.42718
Ncor2	0.426992
Mgll	0.426928
Atf5	0.426738
Npr3	0.426734
Ccz1	0.426712
Zcrb1	0.426702
Gramd1b	0.426672
Klrg2	0.426665
Adss	0.426638
Pif1	0.426355
Pex11a	0.426272
Apobr	0.426263
Cox4i2	0.426228
Adarb1	0.426137
Gm5506	0.426109
Nol10	0.426107
Cenpm	0.426038
Bub1b	0.425938
Cdv3	0.425681
Foxm1	0.42568
Snrnp35	0.425455
Gnptab	0.425417
Tomm70a	0.425408
Fnbp1	0.425375
Dpy19l1	0.425363
Ipo4	0.425361
Kcnh4	0.425296
Ccl5	0.425235
St3gal2	0.425123
Mafg	0.425088
Rgs20	0.425044
Kdelr3	0.424994
4930427A07Rik	0.42491
4930404I05Rik	0.424903
Pgam1	0.424848
Pla2g12a	0.424845
Prpf40a	0.424753
Ddc	0.424585
Polr2f	0.424554
Efcab5	0.424532
Ppap2c	0.42445
St14	0.424252
Snrpa	0.42412
Ska3	0.424099
Fam132a	0.42408
Sdf4	0.424027
Gtse1	0.423932
BC027231	0.42386
Eftud2	0.423858
Ccdc85c	0.423637
Emp2	0.423598
Arl6	0.423498
Nol6	0.423487
Mrto4	0.423453
Tubb6	0.423225
Ptma	0.422763
Nampt	0.422749
Aco2	0.422624
Csgalnact1	0.42258
Mmadhc	0.422494
Ube2e2	0.422388
Set	0.422305
Fst	0.422294
Gm14023	0.422235
Gna12	0.422178
Impad1	0.422079
Noa1	0.422034
Dlgap5	0.421943
Chtf18	0.421911
Sel1l3	0.42189
Gbp11	0.421871
Pcyt1a	0.421841
Clcn3	0.421496
Mvp	0.421466
2310008H09Rik	0.421458
Ncaph	0.421409
Tomm5	0.421243
Il2	0.421124
Snrpf	0.421079
Pitx1	0.420885
Gm14393	0.420864
Sh3rf1	0.420694
Hspa1b	0.420649
Ece1	0.420409
Fam78b	0.420297
Fzd7	0.420189
Wdr36	0.4201
Dgcr8	0.419835
Slc5a10	0.419781
Gm8615	0.419735
S1pr2	0.419524
Tmtc2	0.419447
Gstm5	0.419396
Large	0.419374
Cd59a	0.419313
Tnfsf9	0.419256
Rbm8a	0.419009
Erlin2	0.419005
Rbm47	0.418956
Gpnmb	0.418952
Unc80	0.418832
Baz1a	0.418765
Ap1ar	0.418738
Pmepa1	0.418658
Wdr43	0.418469
Ly6a	0.41832
Pard6b	0.418291
Phb2	0.418255
Prdx1	0.418248
Cnih	0.418203
Ccne1	0.418133
Bag3	0.418133
Gm16516	0.418112
Gzmg	0.418081
Myo6	0.418072
Slc9a8	0.41804
Pwwp2b	0.41804
Fam118b	0.418009
Ppp1r2	0.417926
Serpina3m	0.417853
Zfp367	0.417498
Fam184b	0.417393
Rqcd1	0.417375
Wnt3	0.417313
Tmem201	0.417285
Fosl1	0.417173
Atp2a2	0.417094
Chsy1	0.417043
Cct7	0.417005
Lyar	0.416956
Nol12	0.416934
Mastl	0.416808
Cd200r1	0.416798
Ptpla	0.416616
Esm1	0.416547
Nhp2	0.416546
Lonp1	0.416367
Kdm2b	0.416071
Mrps7	0.415942
Rbms1	0.415933
Mier3	0.415932
Sh3d21	0.415881
Pdxp	0.415781
Timm10	0.41578
Minpp1	0.415611
Sytl3	0.415481
Pecr	0.415453
Sh3bp4	0.415442
U2af1	0.41533
Cenpw	0.415135
C230052I12Rik	0.415059
Chpf2	0.414967
Hnrnpa0	0.414946
Emc4	0.414836
Shisa3	0.414576
Psmc3ip	0.414482
Mtbp	0.414453
Tecpr2	0.414449
Rrp12	0.414186
Nrip3	0.414167
Capsl	0.414046
Ung	0.413933
Mrpl54	0.413923
Brix1	0.413922
Mxd3	0.413716
Pgam5	0.413684
Vcp	0.413678
Bak1	0.413614
Gins3	0.413551
Raph1	0.413361
Ccdc86	0.413168
Lonrf1	0.413067
Ttc30a1	0.413025
F3	0.412872
Sf3a2	0.412859
Gcat	0.412805
Cdk18	0.4128
Itgb5	0.412761
Mrpl45	0.41275
Stxbp6	0.41259
Tnfsf4	0.412564
Nob1	0.412541
Mllt11	0.412525
Aldoart1	0.412506
Ncl	0.41246
2900097C17Rik	0.412438
Rnf7	0.412382
Cox5b	0.41235
Spc24	0.412219
Pxmp2	0.412209
Ccny	0.412139
Pigt	0.412091
Slfn3	0.412014
Emc6	0.411932
Aga	0.411804
Fam72a	0.411796
Ddx18	0.411774
Il10	0.411722
Cndp2	0.411674
Nusap1	0.411513
Polr3g	0.411422
Tmco1	0.41137
Ttc27	0.411249
Pdzrn3	0.411153
Rfc3	0.411056
Hyou1	0.411021
Psmb7	0.410997
Rhov	0.410886
Lrrfip2	0.410867
B4galt4	0.410811
Hmgb2	0.410789
Csf2rb	0.410741
Ankrd52	0.410616
Ovol2	0.410579
Lancl2	0.410347
Car13	0.409993
Cdk2ap1	0.409964
Pgm3	0.409769
Kcnk10	0.409747
Nup62	0.409729
Vash1	0.409654
Ubtf	0.409634
Nras	0.409555
Ripk2	0.409546
Rasgef1b	0.40941
Uba2	0.40939
Sema3c	0.409291
Lzic	0.409149
Eif6	0.40913
Bhlhe40	0.409056
Ftsjd1	0.409028
Thumpd1	0.408948
Comt	0.408948
Papd7	0.408931
Amh	0.408921
Pura	0.408827
Uhrf1bp1	0.408776
Ebna1bp2	0.408766
3110082I17Rik	0.408626
Polr3d	0.408567
S100a13	0.408548
Wsb2	0.408509
Mad2l1	0.408428
Rplp2-ps1	0.408406
Bik	0.40837
Lpxn	0.408292
Prdm4	0.408022
Rock2	0.407944
Gnas	0.407853
Pggt1b	0.407797
Polr2d	0.40763
Pip5k1b	0.407624
Pop7	0.407603
Rsph4a	0.407509
Rnmtl1	0.407423
Smarcc1	0.407414
Fap	0.406976
Gnaz	0.406967
Gm5069	0.406902
Mcrs1	0.406851
Gm5803	0.406797
Ufm1	0.406666
6430531B16Rik	0.406602
Atad3a	0.406408
Nol7	0.406377
Cdon	0.406361
Nop58	0.406311
Dhrs7b	0.406241
Pes1	0.406077
Tsr1	0.405985
Nenf	0.405977
Plxnc1	0.405947
Mfsd2a	0.40578
Ldlrad3	0.405762
Ankrd37	0.405468
Ap1s1	0.405375
Nop2	0.405355
Srsf2	0.40525
Rsl24d1	0.40506
Pold2	0.404733
Lsm3	0.404689
Sh3tc1	0.40467
Tcp1	0.404642
Alg10b	0.404595
Foxf2	0.404562
Insl6	0.404475
Cops5	0.404438
Ipo7	0.404383
Mtpn	0.404359
Sp7	0.404276
Ywhag	0.404262
Mrfap1	0.404208
Gtl3	0.404152
Gm16793	0.404138
Tlcd2	0.404064
Ddr2	0.403884
Hist1h1b	0.403865
Dnajc25	0.403804
Eif5a2	0.403727
Psma7	0.403696
Tpm3	0.403662
Rrp9	0.403423
Pfkp	0.403386
D19Bwg1357e	0.403307
Gsn	0.403251
Dohh	0.402992
Rassf5	0.402958
Gad2	0.402716
Ubfd1	0.402666
Hspa5	0.402505
Ubxn2a	0.402441
Cdkn3	0.402381
Clu	0.402353
Eif4h	0.402253
Rps6ka5	0.402145
Ube2q2	0.402101
Icos	0.401989
Pin1	0.401735
Nfat5	0.401684
Gnl2	0.401597
Ccdc43	0.401481
Derl3	0.401397
Cd48	0.40119
Plod2	0.401167
Pusl1	0.401165
Gpr55	0.40114
Xpo4	0.401107
Phf6	0.400996
Lta	0.400947
Slc35f2	0.40092
Calr	0.400882
Rsph3a	0.40085
Ndufaf6	0.4008
Npepl1	0.400729
Ap2m1	0.400677
Hint1	0.40052
Sec31a	0.400504
Tmbim4	0.400373
Smarcb1	0.400282
Gmnn	0.400276
Gemin4	0.400209
Gm6498	0.400199
D930020B18Rik	0.40015
Slc16a1	0.400091
Eif1a	0.399879
Alox12b	0.399816
Steap3	0.399803
Snrnp40	0.399737
Ankrd28	0.399616
Wdr59	0.399511
Ddx19a	0.3995
Cdc25a	0.399368
Zfp385b	0.399342
Kti12	0.3993
Rab44	0.398773
D030056L22Rik	0.398768
1110008F13Rik	0.398629
Papln	0.398554
[truncated: 10,743 more rows]

## Sheet: Il17a correlating genes
Gene Symbol	Similarity
Il17a	1
Lamc3	0.952591
Ngf	0.947432
Il17f	0.930169
2310007L24Rik	0.925756
Nhs	0.919412
Iyd	0.909822
Ppp1r14c	0.902198
Postn	0.900599
Wwtr1	0.896413
Gli3	0.893716
Gad1	0.88919
Tmeff1	0.888445
Ly6f	0.888434
Lingo4	0.885746
Pdpn	0.882705
Cyp1b1	0.875315
Plekhf2	0.868879
C2cd4d	0.86344
Col4a1	0.855707
Ccl20	0.839669
Gja5	0.836423
Col4a2	0.833684
Olfm2	0.8308
Cldn25	0.823967
Crispld2	0.821265
Rab18	0.821028
Lrrc66	0.819846
Cpox	0.817982
Il1r1	0.814155
Aqp3	0.808982
Srgap1	0.800094
Vax2	0.791876
Il17re	0.782471
Kctd14	0.764242
Ddr1	0.757755
Nmt2	0.750334
Sgpl1	0.743398
Rorc	0.732951
Prss46	0.732314
Gpr15	0.728672
Ppp1r3d	0.728347
Timp1	0.72693
Tdrkh	0.726755
Peli2	0.7262
Tpt1	0.721909
Sema6d	0.720984
Lpar1	0.71696
Arntl	0.716757
Gstm1	0.71598
Pdcl3	0.715847
Cnih3	0.713647
U05342	0.712151
Cyp1a1	0.705135
Rnft1	0.704703
9130015A21Rik	0.703958
Apoa2	0.696581
Rora	0.695134
Pak1ip1	0.694773
Msi1	0.691222
Nr1d1	0.690091
Mapkbp1	0.688528
Aplp2	0.688468
Nsf	0.687651
Il23r	0.687374
Acot9	0.684992
Mpc1	0.682141
Stx12	0.681107
Ints4	0.679611
Elk1	0.677474
Angptl2	0.677305
Maged1	0.676706
Xkrx	0.675712
Ccr6	0.67418
Pkdcc	0.673904
Nat8l	0.671032
C330021F23Rik	0.668754
Ext1	0.668547
Lrrc17	0.668017
Tpd52l2	0.665918
Tbca	0.665526
Alas1	0.665117
Fam110c	0.661166
Ppp3r1	0.66112
Gfpt2	0.65923
Prss12	0.65892
Agap3	0.658179
Elmod2	0.657769
Sh3pxd2b	0.657639
Pdcl	0.65751
Pcdh7	0.656223
Zfp189	0.656076
Spsb3	0.656062
Casr	0.655078
Kctd11	0.654182
Tsg101	0.650448
Rpl7	0.650163
Psenen	0.648672
Igf1r	0.64829
Atrnl1	0.648222
Agap1	0.648103
Tmem131	0.646265
Vwa1	0.645717
Rsf1	0.645434
Spg20	0.644329
Tspan2	0.644288
Pfdn5	0.643939
Akr1b7	0.641598
Eif2ak1	0.64071
Paip1	0.639048
Acvr2a	0.63843
Tshz2	0.635433
Cry1	0.635028
Tfap2a	0.634725
Vps37a	0.633952
Cstb	0.63318
Rdh9	0.632519
Paqr8	0.632398
Stk38l	0.631727
Magee1	0.631589
Dfna5	0.630633
Txndc17	0.630591
Gm14305	0.630021
Scoc	0.629661
Rpl30	0.628819
Dcaf10	0.627407
Malt1	0.626935
Rfk	0.625518
Sacs	0.623157
Smad1	0.62273
Ly6k	0.622054
Zfp52	0.617753
Kcnmb4	0.617439
Trps1	0.615984
Itga5	0.615472
Jtb	0.615121
Rpl37a	0.613829
Ift20	0.61371
Slc44a1	0.613284
Dedd	0.612499
Sra1	0.610972
Rab6a	0.609501
Uba1	0.609194
Laptm4a	0.608888
Ccdc127	0.607467
Mpp5	0.607114
Ankrd40	0.607046
Epb4.1l2	0.606306
Bach2	0.6052
Adam12	0.603052
Lgr4	0.602271
Tapt1	0.601647
Atp6v0a1	0.601567
Adh4	0.601517
Clstn3	0.601244
Zfp629	0.599703
Slc25a17	0.598591
Polr2g	0.598049
Alpk2	0.597937
9930021J03Rik	0.59752
AI597468	0.596948
Cnot6	0.596586
Vps4a	0.596226
Slc4a2	0.59505
Sat1	0.594344
Syn1	0.594235
Gas5	0.594161
Pdlim5	0.593827
Mib1	0.593695
Fnbp1l	0.593661
Ndufs5	0.593583
Hey1	0.592927
Uqcrh	0.592529
Ssx2ip	0.590718
Gcnt2	0.589776
Lum	0.589565
Tead3	0.589546
C1s	0.589248
Ylpm1	0.588952
Arpc3	0.586155
Rnf149	0.585282
Rapgefl1	0.585115
Gm10033	0.584133
Atp5h	0.580166
Tomm7	0.579697
Col7a1	0.579329
Afap1	0.57871
Atxn2	0.578471
Leprel4	0.577478
Gtf3c3	0.577469
Acly	0.577383
Mtss1	0.577277
Hagh	0.576249
Pex5	0.575723
Dcun1d1	0.574199
Casc1	0.573373
Wdr47	0.571304
Card10	0.570922
Rtn4	0.570485
Plekho1	0.5703
Cacul1	0.568295
Rpl31	0.565715
Fxr1	0.565511
Cox6b1	0.565501
Sufu	0.565292
Ptprf	0.56517
Copb1	0.565046
2700060E02Rik	0.564461
Atp6ap1	0.56418
Cpd	0.563778
Sec24c	0.563318
Pdzd8	0.563274
Lypla1	0.562705
St5	0.562531
Slc4a11	0.562458
Zbtb39	0.562107
Mlec	0.561878
Tnip2	0.561856
Cdkl3	0.561383
Lrrc41	0.561366
Slc16a10	0.561254
Clp1	0.560984
Immp1l	0.560014
Zfp422	0.560009
4833439L19Rik	0.559651
Ndufb5	0.559231
Stab1	0.558656
Kifc3	0.55862
Tspan6	0.558423
St13	0.558349
Raver1-fdx1l	0.558065
Lonp2	0.556868
Zfp46	0.556452
Znrd1	0.556306
Rps23	0.556176
Col20a1	0.556137
Rps6ka3	0.556022
Serinc5	0.555391
Serpina1a	0.554351
Pnp	0.554288
Dnajc12	0.554256
Elk3	0.554177
Ccdc63	0.55303
Zyx	0.552809
Prpf6	0.552126
Ndufaf3	0.550668
Exoc2	0.5505
Gng5	0.550397
Stxbp3a	0.54976
Adarb1	0.549498
Vangl2	0.548918
Tubb2b	0.548209
Gm14057	0.548184
Ubl4	0.547698
Serpinb1a	0.547231
Lefty1	0.54602
Il22	0.545236
D5Ertd579e	0.544366
Tbcb	0.544035
Acsl3	0.543082
Mapk7	0.542999
Nt5e	0.542762
Urgcp	0.542648
Rps15a	0.54201
Chmp4b	0.540604
Zfp800	0.54029
Ppfibp1	0.540278
Rnf11	0.539933
Ahrr	0.539861
Acot10	0.539849
Uqcrb	0.53958
Rspry1	0.539265
Cd101	0.539027
Cyb5d2	0.538743
Tnfaip1	0.537174
Ptk7	0.536491
Dnajb2	0.536395
Gabarap	0.535921
Khdrbs1	0.535568
Bdh2	0.535308
Tbc1d12	0.535199
Rfwd2	0.534972
Ust	0.534748
Nsa2	0.533364
Gm12505	0.533034
Chmp5	0.532944
Matr3	0.532808
Gdf11	0.532515
Avpr1a	0.532333
Spast	0.532146
Rpl9	0.532055
Psd2	0.531937
Lrig1	0.530881
Cox19	0.530083
Creb3l2	0.529099
Nit2	0.529079
Cd63	0.528713
Tmem5	0.528638
Ptgfrn	0.528186
Psg23	0.527827
Tgfbr1	0.527701
Pcsk6	0.526413
Rnf25	0.525717
Cnn3	0.524872
Erv3	0.52485
Gm5766	0.524483
Pvrl1	0.523459
Ankle2	0.522534
Bpifc	0.522309
Rab2b	0.521986
Eif3e	0.52169
Tbpl1	0.520729
Pcnxl4	0.520529
Clcn2	0.520357
Ubr3	0.52016
Eef1b2	0.51979
Pdzd4	0.519701
Flnb	0.519687
Zfp667	0.519374
Ube2q2	0.519255
Rps15a-ps6	0.518826
Rps14	0.518709
Rpl38	0.518381
Cdc16	0.517903
Uqcrc2	0.517386
Ptpn4	0.517208
Ccdc174	0.516666
Gm5148	0.515648
Rpl23	0.515553
Arfgap1	0.515217
Chm	0.514982
Fam124b	0.51477
Rab11a	0.514526
Glud1	0.51414
Wwc2	0.514126
Ahr	0.513315
Exoc3	0.512708
Scmh1	0.511116
Ociad2	0.510976
Clock	0.510971
Sgpp2	0.510623
Ufd1l	0.510405
Dus2l	0.509475
Rps15a-ps4	0.509448
Slc39a14	0.509175
Wdfy4	0.50882
Zfr	0.50831
Map4k5	0.508164
Rpl21	0.507958
Taf13	0.507608
Rpl36a	0.507399
Gpx1	0.507313
Rps27a	0.507241
Tpmt	0.506806
Mien1	0.506688
Farp2	0.50647
Zswim3	0.505812
1110018G07Rik	0.504592
Gabarapl2	0.504573
Prrc1	0.504133
Pkib	0.503749
Zfp954	0.503723
Palld	0.502082
Ammecr1l	0.501891
Ppp2r3c	0.501698
Ctsl	0.501082
Hnrnpc	0.501061
Mrps23	0.500965
Leo1	0.500746
Syde2	0.50071
Rpl14	0.500412
Akirin2	0.500242
Fxr2	0.500213
Usp6nl	0.499948
Rpl5	0.49992
Zfc3h1	0.499786
Mtfr1	0.499555
Rassf8	0.498862
Sacm1l	0.498833
Ccdc85b	0.498659
Galnt14	0.498635
Ube2a	0.498605
Acbd3	0.498182
Atp6v1e1	0.497994
Prcp	0.497476
Efhc1	0.497409
Abcb4	0.497405
Pias2	0.497096
Epha1	0.496927
Rps28	0.496821
Wdr92	0.49666
BC023829	0.496335
Polb	0.496071
Las1l	0.495626
Rpl23a	0.495499
Snora65	0.494832
Slc9a2	0.494269
Fam3c	0.49412
Rpl39	0.493629
Dgkg	0.493548
Sec23a	0.493121
Rpl37	0.492812
Zfp27	0.492579
Fhl3	0.492247
Ehd4	0.492045
Arl8a	0.491019
Rps7	0.4906
Zmym2	0.490283
2410004N09Rik	0.490093
Gdpd1	0.488902
Dync2h1	0.487802
Ddi2	0.486505
Gapvd1	0.486255
Suclg1	0.485946
Caml	0.485709
Rhbdl3	0.485631
Atg4b	0.485564
Snapc1	0.485558
Gngt2	0.485325
Cacnb2	0.485276
Tmem150a	0.483578
Mrpl30	0.482782
Cd38	0.482636
A630007B06Rik	0.482581
Rnh1	0.481925
Efemp2	0.48183
Cdc42bpb	0.481439
Rcan1	0.480648
Zfp451	0.480469
Gnb2l1	0.480175
Trim32	0.479536
Eif4a2	0.479286
Ubxn1	0.479205
Cln5	0.478521
9130019O22Rik	0.478442
Rps24	0.47839
Tspyl2	0.478328
Rad54l2	0.477934
Zmym4	0.477335
Tspan5	0.477219
Cnnm4	0.476209
Grm6	0.476166
Klhl7	0.47592
Dnm3	0.475581
Arl3	0.475568
Rps21	0.475484
Psmb1	0.475469
Slc39a10	0.475365
S1pr3	0.47533
Wwp1	0.475196
Ptges2	0.475052
Dstyk	0.474933
Mcfd2	0.474879
Gnpda2	0.474727
Sdf2	0.474702
Magi3	0.474109
Skp1a	0.474095
Prps1	0.473983
Med22	0.47305
Ubr5	0.472887
Taf1d	0.472779
Polg	0.47227
Dpm1	0.472114
Abcc9	0.472105
Rps15	0.472102
Cox7c	0.471875
Rnf216	0.471098
Gm10814	0.470913
Bcorl1	0.470831
Anxa5	0.470722
Pcdhga7	0.470662
Phax	0.47058
Golga4	0.470443
Tnk1	0.469993
Mnat1	0.469814
Ints6	0.469578
Yme1l1	0.469454
Uso1	0.469385
C030046E11Rik	0.468628
Rpl19	0.468468
E430018J23Rik	0.468343
Sdhc	0.467805
Fam131b	0.467762
Rmrp	0.467748
Pip5k1a	0.467419
Bpgm	0.466963
Trnau1ap	0.466796
Homer3	0.466479
Fgd1	0.466389
B4galt3	0.466374
Ctsw	0.466177
Ndufaf2	0.465968
Zranb1	0.465857
Tesk1	0.465453
Nuak1	0.464914
Ppp1r10	0.464611
Tmem19	0.464006
Rpl24	0.463955
Zxdc	0.463938
Fyttd1	0.46354
Slk	0.463514
Sun1	0.463448
Lamp2	0.463342
Ctnnb1	0.463202
Vps36	0.463095
Rem2	0.462932
Slc39a13	0.462486
Mttp	0.462417
Rbak	0.461643
Copb2	0.461467
Use1	0.461406
Timp2	0.461266
Them4	0.460708
Stat3	0.460693
Tyw5	0.460642
Zfp54	0.460599
Zbtb34	0.460559
1110038B12Rik	0.460504
Naca	0.46035
Mmp14	0.460333
Rps27	0.460282
Rprd1a	0.460237
Zfp97	0.460189
Ube2b	0.460176
Ncor1	0.46002
Pltp	0.459508
Atp6v0d2	0.459404
Tigd5	0.459364
Dr1	0.459303
1500011K16Rik	0.459279
Rnf2	0.459184
Zfp790	0.458967
Comt	0.458889
Zfp575	0.458775
Ankrd13c	0.458106
Tarsl2	0.457643
Dync1li1	0.457512
Socs7	0.457302
Tec	0.457032
Cul1	0.456586
Grk5	0.456502
Eif2b2	0.456448
Gatad2b	0.456393
1810009A15Rik	0.456049
Zfp768	0.455694
Sdc1	0.45533
Rpl27	0.455269
Rpl35a	0.454388
Calm2	0.454365
Phf16	0.454219
Prkci	0.453666
Wapal	0.453165
Snx22	0.453081
Gm4262	0.453058
Swt1	0.452981
Pex13	0.452674
Sin3b	0.451813
Trrap	0.45179
Strn3	0.451574
Kdm5b	0.451533
Csnk1e	0.451475
Osbp	0.451392
Olfr1033	0.451256
Sqrdl	0.451153
Itga3	0.450991
2010107E04Rik	0.450757
Tmem55b	0.450601
Gm19757	0.450519
Aprt	0.450475
Eef1g	0.450435
Tfg	0.45025
Zc3h12d	0.450217
Golph3	0.450205
Atrip	0.449829
Bmp1	0.448297
Slc36a4	0.44793
Rpl27a	0.447671
Eng	0.447621
Gm10845	0.447613
Cxcr5	0.447525
Lamc2	0.447362
Pcdhgb6	0.447314
Ric8	0.447143
Gm561	0.447075
Maea	0.446943
Prkrir	0.446913
Agpat1	0.446906
Mfn1	0.446872
Cerk	0.446506
Rngtt	0.446475
Trip10	0.446352
Zfp655	0.446012
D830031N03Rik	0.445721
Rab2a	0.445536
Phf13	0.44547
S100pbp	0.445341
Itpripl1	0.445323
Whrn	0.445259
B230120H23Rik	0.445228
Dnajb5	0.445191
Rbms2	0.444927
Mtch2	0.444828
Frmd6	0.444589
Arfip1	0.444408
Snora16a	0.443488
Zfp410	0.443456
Zfp286	0.443395
Tlk2	0.443092
2410015M20Rik	0.443046
Rab11fip3	0.442689
Prg4	0.442517
Usp9x	0.442116
Wdr89	0.442077
Ubash3b	0.442038
Rpl26	0.441985
Psmd4	0.441977
Pmpcb	0.441892
Gm14393	0.441419
Armcx3	0.441257
Rint1	0.441236
Naa16	0.441143
Pvrl3	0.440997
Dnajc8	0.440249
Atp7a	0.440086
Rexo4	0.440005
Frmd4a	0.439969
Fgf2	0.439885
Kcnq2	0.439883
Rps4x	0.439872
Hsd17b10	0.439571
Rps13	0.43944
Tti2	0.439041
Scaf4	0.438528
Kpna1	0.438412
Commd2	0.438328
Myof	0.437943
Suox	0.437405
Mmgt1	0.437341
Ldhd	0.437248
Mea1	0.43723
Smad2	0.436697
Atxn10	0.43657
Rpl17	0.436552
Sec61g	0.436143
Rps16	0.43588
Bpnt1	0.435549
Stx18	0.435292
Catsper2	0.435208
Thnsl2	0.435085
Ccdc90b	0.435024
Map3k10	0.434584
Gpr68	0.433903
Nipal1	0.433794
Uxt	0.433765
Atp6v0e	0.433671
Ppp2r1a	0.433625
Glo1	0.433346
Tsc22d1	0.433207
Rpl6	0.432908
Usp42	0.432699
Setd3	0.432674
Eef1a1	0.432615
Il21	0.432613
Slc12a4	0.432598
Btf3	0.431814
Tpp1	0.431717
Ap4e1	0.43164
Vdac3	0.431537
Gprc5a	0.431149
1700052K11Rik	0.431141
Dld	0.43102
Rcor1	0.430254
Zfp2	0.430019
Plau	0.429979
Zmat2	0.429879
Tmem8b	0.429781
Lag3	0.42972
Calu	0.429477
Kdm1a	0.429055
Ptplb	0.428891
Pogk	0.428884
Zfp609	0.428662
Ssu72	0.428604
1700123O20Rik	0.428476
Rps18	0.428382
1600020E01Rik	0.428372
Srp54c	0.428171
Dnajc18	0.428015
Tubb6	0.427938
Rhot1	0.427646
Dlg2	0.427618
Pcdhgb4	0.426606
Samd4b	0.426497
Hs6st1	0.426476
Cnot10	0.426083
Ost4	0.425539
Eif3m	0.425326
Tox2	0.424326
Ppfia4	0.424317
Rabggtb	0.424178
Inca1	0.424133
Trim44	0.423996
Gm5124	0.423409
Pik3ca	0.42296
Dnajc14	0.422856
Elp4	0.422366
Ppm1a	0.422189
Gria3	0.421959
Uba3	0.421835
Tacr1	0.421779
Npr3	0.421656
Ppp2cb	0.421636
Lars2	0.421612
Chmp7	0.421525
Nlrp12	0.421471
Erc1	0.421447
Rpl15	0.421276
Ndufb6	0.421264
Rps11	0.421196
Ly6d	0.420234
Ppil3	0.420142
Mpzl1	0.419586
R3hcc1	0.419387
Hspa4l	0.418786
Rplp2	0.418232
Gpkow	0.418143
Arhgef9	0.417716
Eif4b	0.41767
Mpp6	0.417398
Pcgf3	0.417057
Rnasek	0.416768
Snx4	0.416567
Rangrf	0.416492
Abcd3	0.416435
Fbxw11	0.416352
Adh1	0.41634
Dync1i2	0.415974
Zfp747	0.415874
Rab11fip5	0.415829
Trio	0.415798
Pou2af1	0.415745
Chd4	0.415653
Ube2m	0.415653
Uba5	0.415517
Surf4	0.415387
Rpl10	0.415022
Gnb1	0.414634
Polr2k	0.414543
Anapc10	0.414519
B3gnt8	0.414361
Dnajb1	0.414319
Rgs8	0.414052
Sec22a	0.413967
Cep170	0.413727
Ube2w	0.413611
Slc46a1	0.413584
Rps19	0.413548
Rps6	0.413492
Psmd2	0.413438
Ipmk	0.413215
Dpy19l4	0.412989
Dntt	0.41289
Tnfrsf10b	0.412878
Celsr2	0.412657
Ivns1abp	0.412598
Camsap2	0.412373
Ndufb10	0.412323
Copz1	0.412168
Sspo	0.412158
Edem3	0.412015
Abcf3	0.411923
Mrps6	0.411274
D17H6S53E	0.411228
Gtf2e1	0.411047
Gja1	0.410747
Avpi1	0.410678
Gnb4	0.410614
Gpr162	0.410476
Yipf5	0.410412
Dvl3	0.410392
Sugt1	0.410033
Alkbh7	0.409891
Fau	0.409791
Rcn2	0.40974
Bbs1	0.409697
Lrrc58	0.409564
Acn9	0.40925
Brf2	0.409181
Vapa	0.409145
Inpp5b	0.409131
Ocrl	0.408877
Mapk9	0.408765
Rab21	0.408353
Ubqln1	0.40819
Mapkapk3	0.4081
Slc35a3	0.407812
C78339	0.407562
Gcdh	0.407369
Prosc	0.406965
Arhgap39	0.406657
Pdlim7	0.406638
Prdx5	0.406439
AA414768	0.406201
Sepsecs	0.405932
Ss18	0.405819
Rdh11	0.405706
Trp53inp1	0.4057
Lpcat3	0.40565
Cul4b	0.405351
Scamp1	0.405247
Kctd6	0.405161
Dcun1d4	0.404941
Ubxn4	0.404879
Prdx3	0.40478
Usp15	0.404642
Zxda	0.404508
Eif3k	0.404219
Capns1	0.404144
Twsg1	0.403781
Osbpl2	0.403751
Hmgn1	0.403644
Thap2	0.403024
Zfp960	0.402953
Srpr	0.402751
Sgce	0.402301
1700021F05Rik	0.402067
Gap43	0.401934
Itga2b	0.401695
Chuk	0.401567
Rps8	0.401545
Cnih	0.401287
Mefv	0.401105
Dynlt3	0.400455
Kansl3	0.40038
Fbxo3	0.399715
Atg9b	0.399458
Rab3gap2	0.399351
Tmem115	0.398971
Ndufv2	0.39894
Dlat	0.398906
Lynx1	0.398838
Atp5g3	0.398721
Zfp382	0.398643
Tnfrsf12a	0.398552
Emd	0.398013
Slc37a2	0.397883
Cyth4	0.397631
Srr	0.397561
Pold4	0.397409
Zscan12	0.39737
Ubqln4	0.397236
Epm2aip1	0.397061
Otud7b	0.397027
Arf1	0.396654
Cox5a	0.39654
Mpp7	0.396429
Ralbp1	0.396231
Ppp1cc	0.396085
2007-03-01	0.396067
Osbpl11	0.395854
Rpl4	0.395728
Ptms	0.395585
Plscr3	0.395577
Wdr1	0.395125
Fkbpl	0.39483
Tle1	0.39472
Mtmr7	0.394611
Actr1b	0.394147
Riok3	0.393321
Gpr107	0.392474
Ccnc	0.39202
Stxbp1	0.391945
E330033B04Rik	0.391617
Slc25a20	0.391551
Arhgap31	0.391507
Csnk1d	0.391503
Snap23	0.391472
Vat1	0.391405
Srp54a	0.391376
Foxf2	0.391137
Gemin7	0.391126
Zfp867	0.391102
Glce	0.390847
Cct4	0.390604
Gprasp2	0.390547
Brwd3	0.390315
Gm8580	0.390093
Gpr157	0.389837
Vti1b	0.38982
Adipor1	0.389475
Fbxo27	0.389412
Fubp3	0.389173
Bend4	0.389133
Ipo7	0.389063
Rragc	0.389038
Nav2	0.388987
Abca5	0.388938
Ncs1	0.388751
Rps5	0.388735
Zfp780b	0.388625
Gm10818	0.388621
Ier3ip1	0.388608
Mark4	0.388569
Cd300lg	0.388538
Coq3	0.388371
Dynlrb1	0.388265
Gm4832	0.388082
Igf2r	0.38801
Arl1	0.387481
2410006H16Rik	0.387423
Usp38	0.38719
1500012F01Rik	0.386666
Hcfc2	0.386594
Rpl22	0.38658
Fbxo6	0.386337
2002-09-01	0.38625
Ttc26	0.385964
Rpl18	0.385811
Rpl7a	0.385803
Pkn3	0.385642
Spcs1	0.385447
Lcat	0.384602
Sec13	0.38431
Tatdn1	0.384268
Atp5l	0.384039
Cox17	0.383907
Ankrd55	0.383713
Rnf208	0.383695
Nhlrc3	0.383374
Dapk1	0.383237
Emb	0.383011
Cdh23	0.382567
Capg	0.382439
Bola2	0.38213
Tomm40l	0.382118
Pcdhgb5	0.381921
Tnfrsf22	0.381864
Zcchc17	0.381688
Pgs1	0.381503
Dnajc24	0.381458
Zfp583	0.3813
Airn	0.381282
Atp6v1g1	0.381148
C1d	0.380845
Rnaset2a	0.380741
Cycs	0.380677
Rpl34	0.380557
Slc31a1	0.37993
Acsl4	0.379678
2900097C17Rik	0.37864
Plxna3	0.378528
Csnk2a2	0.378435
Fndc3b	0.378244
Ptcra	0.378238
Rpl12	0.378205
Dpy19l3	0.378082
Sar1b	0.377568
Ube2d2a	0.377538
Eif5b	0.377408
Senp1	0.377097
Ndel1	0.377091
4933434E20Rik	0.376877
Glrx3	0.37676
Rpsa	0.376744
Rbm18	0.376596
Klri2	0.376505
Slc38a6	0.376135
Myo3b	0.376104
Commd6	0.375963
Adam19	0.375961
Zc3h12b	0.375792
Snhg1	0.375509
Hdlbp	0.375375
Zfp597	0.375294
Pcdhga10	0.374922
Zfyve16	0.374891
Syp	0.374696
Brox	0.374569
Actr10	0.374502
Rnaset2b	0.374483
Rnf34	0.374107
Spata5	0.373745
Hsbp1	0.373737
Gnpnat1	0.373467
Chmp2a	0.373436
Dpf2	0.37329
Glyr1	0.373197
Slc41a1	0.372965
Igbp1	0.372933
Nlgn2	0.372787
Atp5f1	0.372357
Papd5	0.372337
Rplp0	0.372144
Cd24a	0.372059
Noxo1	0.371843
Pdgfb	0.371804
Csnk1g3	0.371677
Pls3	0.371603
Rabgef1	0.371375
Tnfrsf25	0.371263
Hnrnpk	0.370759
Eif2ak4	0.370673
Armcx2	0.370613
Emc2	0.370541
Ildr1	0.370518
Eogt	0.370444
Adprh	0.37043
Tnks1bp1	0.370318
Socs6	0.370219
Dsel	0.370134
Uimc1	0.370086
Gm1045	0.369843
Myo15	0.369772
B4galt1	0.369762
Anxa7	0.369468
Prkcq	0.369143
Emp1	0.369124
Creld1	0.369081
Spryd3	0.368737
Ube2z	0.368443
Begain	0.367854
2006-03-01	0.367755
Zxdb	0.367753
Shfm1	0.367661
Nhsl1	0.367658
Blvrb	0.367617
Hdac4	0.3676
Suds3	0.367583
Dnahc10	0.367437
Gdi1	0.36741
Atp2a2	0.367351
Rap1a	0.367291
Cmtm3	0.367232
Lat2	0.367141
Map3k4	0.366882
Slc11a2	0.366279
Slc4a1ap	0.366193
Luzp1	0.366122
Serinc1	0.365882
Actn4	0.365699
Mkrn2	0.36543
Usp12	0.3654
Wwp2	0.365399
Rps19-ps3	0.365354
Ube2g1	0.36527
Akr1b8	0.365082
Rad52	0.36501
Gm20098	0.364833
Uchl4	0.364733
Sec23ip	0.364702
Snhg12	0.36465
Dab2	0.364639
Hipk3	0.364626
Eif3a	0.364559
Ckap4	0.364538
Lig4	0.364323
Rpain	0.364198
Uhrf1bp1l	0.36419
Blzf1	0.364035
Qk	0.363731
Cfl2	0.363222
1700029J07Rik	0.363095
Fbxo34	0.363089
Praf2	0.362887
Ndst2	0.362865
Srp14	0.362808
Mical3	0.362789
Rps3	0.362723
Thbs3	0.362629
Mob1a	0.362561
Tceb1	0.362505
Fam129b	0.362395
Marveld1	0.362332
Tigd3	0.362277
Bet1l	0.362218
Kdelr1	0.362154
Nxpe3	0.362114
Ube2r2	0.361863
Ctr9	0.361692
Nme2	0.361627
Pdp2	0.361525
Cwc22	0.361522
Ssfa2	0.361379
Ide	0.361257
Fbxo30	0.361237
Abca1	0.361055
Atp5j2	0.36059
Zfp553	0.360576
Pcnx	0.360307
Tm2d3	0.360085
Snhg8	0.359998
Cand1	0.359034
Csde1	0.358967
Zfp623	0.358923
Marcksl1	0.35892
Naa30	0.358684
Nynrin	0.358662
Hccs	0.358633
Trim27	0.358509
Ddx28	0.35772
Cfdp1	0.357312
Pcbp2	0.357273
Gale	0.356998
Cd151	0.356986
Cyp4a31	0.356777
Caprin2	0.35675
Ppp4r2	0.356649
Lmo4	0.356496
Sec24a	0.356327
Bckdhb	0.356193
Fbxo36	0.356002
Dnajc10	0.355981
Eno2	0.355836
Procr	0.355832
Hars	0.355819
Zfp568	0.355538
Rftn1	0.355402
Acer3	0.35516
Sumo1	0.35514
Rpl13a	0.355075
Plekha4	0.354938
Zfp408	0.354917
Gm14295	0.354789
Hipk1	0.354502
Trip4	0.35449
Wac	0.354252
Capn7	0.354251
Polr2e	0.354142
Itfg1	0.353995
Atp2c1	0.353986
Lgi4	0.353882
Lpar6	0.353643
Stx7	0.353565
Prdx2	0.35344
BC018507	0.353419
Prepl	0.353307
Shoc2	0.35323
Calcrl	0.353199
Zscan18	0.353168
Timm8b	0.353166
Spry1	0.35305
Ap3s1	0.352953
Ndufa7	0.352909
Utp14b	0.352662
Ppp1r3c	0.352581
Tmem106c	0.352482
Xcr1	0.352459
Irf4	0.352374
Mlf2	0.352302
Lin7c	0.352219
Pdha1	0.35217
Gm5077	0.351956
Rgmb	0.351809
Mdp1	0.351797
Rbm27	0.35141
Tuft1	0.351361
Gm6402	0.351174
Dync1li2	0.350789
Ap3m1	0.350745
Kcmf1	0.350662
Rps12	0.35064
Siah1a	0.350639
Ptk2	0.350607
Coq10b	0.35049
Zc3h15	0.350254
Rtn4ip1	0.350165
Slc25a1	0.34964
Hyal2	0.349413
Zbtb9	0.349284
Gfpt1	0.348943
Nedd4	0.348884
Sec24d	0.348814
Ipo13	0.348749
Frs2	0.348626
Hormad2	0.348566
Eif2s2	0.348559
Tuba8	0.348343
Srp68	0.348101
Syngr1	0.347931
Zfp513	0.347767
Lactb	0.347552
Ttc19	0.347533
Maged2	0.347375
Snord22	0.347284
8430429K09Rik	0.347275
Foxred1	0.347275
Hs2st1	0.346943
Eif3i	0.34688
Dlst	0.346779
Ddx3x	0.346629
Fbxl5	0.346349
Tceb3	0.346179
Hspbap1	0.346016
Cd33	0.34588
Rhof	0.345738
Pkn2	0.345641
Gm10408	0.345605
Ppp2r1b	0.345587
Zfp599	0.34535
Bap1	0.34504
Bud31	0.344857
2810403D21Rik	0.344823
Atp5e	0.344809
Cd28	0.344742
Zbtb24	0.344613
Ndufa2	0.344371
Zscan21	0.344345
Map4k4	0.344162
1110004F10Rik	0.343959
Bicd2	0.343843
Mfn2	0.343711
Csnk2b	0.343412
1700020I14Rik	0.343361
Alg2	0.343335
Frmd3	0.34314
Rps25	0.34274
Tmtc3	0.342624
Slc30a5	0.342406
Zmym1	0.342358
Hspb11	0.341944
Usp40	0.341755
Eif3g	0.34171
Ppp6c	0.341445
Tubb2a	0.341267
Wdfy2	0.340952
Smg8	0.340926
Hsdl2	0.340718
Pnpo	0.340648
Hax1	0.340647
Pop4	0.340602
1110046J04Rik	0.340549
Kpna6	0.340524
Pam16	0.340347
Ccnj	0.340283
Tnfrsf1a	0.340077
Tmem120a	0.339979
Taok1	0.339869
Bccip	0.339805
Tma7	0.339479
Ralgps1	0.339273
Plek	0.339201
Camta1	0.339107
Ncoa4	0.33892
Ndufa6	0.338765
Prph	0.338707
Deb1	0.338167
Sec22b	0.338055
Cd86	0.337985
Rps6kc1	0.337955
Fam114a1	0.337576
Lekr1	0.337552
Tiparp	0.337379
Tram1	0.337377
Tuba3a	0.337236
Rpl13	0.336888
Bag1	0.336868
Dhx29	0.336819
1110007C09Rik	0.336661
Usmg5	0.336536
Fam109a	0.336189
Zfp330	0.336143
Snrnp27	0.335838
6430548M08Rik	0.335786
2310057M21Rik	0.335673
Atp6v1f	0.335412
Rab12	0.335369
Arfgef1	0.335149
B3gat2	0.334988
Socs5	0.334907
Rnf24	0.334856
Peg10	0.334354
Ndufaf5	0.334301
Rpl35	0.334287
Dennd2c	0.333834
Cpne8	0.333824
Ankrd46	0.333781
Arl16	0.333684
Cdyl	0.333671
Gsta4	0.333528
Rgs10	0.333283
Zfp341	0.333271
Zdhhc5	0.333191
Sema7a	0.333117
Pigp	0.33306
0610009D07Rik	0.333025
Rps9	0.332947
Kpna4	0.332629
Rhoa	0.332522
Rbpms2	0.33239
Atat1	0.332254
Gss	0.331897
Sec62	0.331687
Zfp719	0.331631
Rufy1	0.331595
Impg2	0.331538
Prr5l	0.331131
Mrpl43	0.331109
Prss36	0.331099
Srpk1	0.331089
Slc9a6	0.330813
Rabep1	0.33046
Jup	0.330061
Shf	0.329967
Glt8d1	0.329804
Kif7	0.329687
Rplp1	0.329255
Ciao1	0.329113
Slc1a4	0.328597
Nat9	0.328481
Zfp131	0.328474
Als2	0.328423
Ubl5	0.328367
Mical1	0.32831
Zfp12	0.3283
Cux1	0.32816
Nudt8	0.328001
Nipsnap3b	0.327884
Ptov1	0.327668
5430416N02Rik	0.327567
Slmap	0.327556
Kif5c	0.32723
Gm20362	0.327083
Mtor	0.327049
Rhbdd1	0.326891
B630019K06Rik	0.326812
Aamp	0.326738
Ddx52	0.326703
Chd1	0.326688
Aurkaip1	0.326617
Utp14a	0.326349
Gfm1	0.326343
2510003E04Rik	0.326206
Patl1	0.326201
Kras	0.326151
Nfat5	0.32614
Gcnt1	0.326062
Zfp191	0.325986
Nkd2	0.325984
Zfp948	0.325869
Wipf2	0.325786
Dhx32	0.325687
Med21	0.325667
BC018242	0.325599
Zmpste24	0.325595
Ttc1	0.325496
Zc4h2	0.325459
Eif2s3x	0.325275
Ptprn	0.325097
Eif3f	0.324881
Pcdhga1	0.324857
Zdhhc9	0.324824
Slc25a5	0.324783
Lrrfip2	0.324644
Rps10	0.324613
Rsc1a1	0.324266
Secisbp2l	0.324259
Zfp318	0.324028
Aftph	0.324009
Llph	0.323672
Mrfap1	0.323557
4933416M07Rik	0.323266
Cul7	0.323179
Macrod2	0.323124
Golga3	0.32312
Gprasp1	0.323055
Jhdm1d	0.322934
Nfyb	0.32286
Mterfd1	0.322839
Cln8	0.322799
Spred2	0.322775
Zfp59	0.322639
Gm5113	0.322636
Pdcd5	0.322484
Zfp174	0.322436
Ddx5	0.322375
Ints5	0.322358
Ppig	0.321923
Gtf2a1	0.32188
Rala	0.321633
Rab5b	0.32161
Ptges3	0.321494
Rufy3	0.321421
Fgfr1op	0.321344
Nup98	0.321093
Klc2	0.321028
Nf1	0.320937
Leng1	0.320894
Tnfrsf23	0.320762
Kdelr2	0.320749
Mterfd2	0.320519
Tnnc1	0.320162
Hiat1	0.320146
Kdm1b	0.320047
Il9	0.320046
Rbm12b1	0.320023
Mta2	0.319958
Ddb1	0.319895
Vamp4	0.319793
Chchd2	0.319636
Ghitm	0.319634
Plekha1	0.319136
Jagn1	0.319119
Rps26	0.318978
Zbtb3	0.318748
Krt222	0.318744
Ppp1r2	0.318708
Me2	0.318605
Efnb1	0.318599
Pogz	0.318194
Anp32a	0.318192
Parn	0.318134
Smox	0.317841
Pgm1	0.317619
Acadm	0.317605
Cox4i1	0.31717
Hook3	0.317069
Pcdhga11	0.316844
Cyp11a1	0.316747
Gng10	0.316564
Ccdc43	0.316252
B230118H07Rik	0.316011
Cd320	0.316005
Sel1l	0.315849
Clint1	0.31573
Slc17a5	0.315291
Lmbrd2	0.315089
Pank3	0.315027
Snora64	0.314935
Gnl3l	0.314891
Rpl8	0.314779
Tlcd1	0.314738
Sall2	0.314711
2610301B20Rik	0.31449
Ehbp1l1	0.31439
Pex3	0.314354
Syap1	0.313969
Cdk12	0.313962
Hgsnat	0.31391
Eef1d	0.313855
Gtf2h5	0.313618
Zfp202	0.313409
Arl10	0.313398
Actr1a	0.313247
Mex3c	0.313216
Hebp1	0.313163
1700019L03Rik	0.313102
Ube2k	0.312996
Rpl18a	0.312905
4930432K21Rik	0.312832
Adat2	0.312818
Hiatl1	0.312689
Kctd10	0.312617
Plekhf1	0.312454
Foxj3	0.312433
Crtc3	0.312339
1110001A16Rik	0.312321
Mettl6	0.312305
Rpl32	0.312298
Cldn10	0.312211
Fgfrl1	0.312191
Gid4	0.312185
Cct7	0.31209
Sh3glb1	0.311872
5730408K05Rik	0.311564
Morc2a	0.311534
Fra10ac1	0.311387
Sc4mol	0.311286
Setd4	0.311284
Paf1	0.311197
Grlf1	0.310758
Rpl11	0.310565
Dhx36	0.310527
Zbtb48	0.310525
Thnsl1	0.310455
AI846148	0.310332
Klhl12	0.310213
Utp11l	0.31015
Mrps16	0.309951
Gdap2	0.309934
Creg2	0.309805
2410018M08Rik	0.309791
Ptpn23	0.309766
Abi1	0.309715
Zfp109	0.30966
Arrdc4	0.309623
3110043O21Rik	0.309597
Gm15417	0.309523
Pin4	0.309328
Tmem168	0.309226
Peo1	0.309145
Csnk1a1	0.30889
1810055G02Rik	0.308817
Samd8	0.30858
Sec14l1	0.308509
Klrc1	0.308466
Wipi2	0.308433
Snapc3	0.30842
Etfdh	0.308234
Gdi2	0.308004
Pmepa1	0.307911
Rest	0.307866
Synpo2l	0.307798
Luc7l2	0.307764
Sp7	0.307753
C1rl	0.307742
Kif1a	0.307509
Jrkl	0.307423
Rer1	0.307318
Phf23	0.307306
Ndufb2	0.307126
Rpl10a	0.307106
Map4k3	0.307014
Reep2	0.306927
Syvn1	0.306569
Tmem65	0.30652
Ttl	0.306198
Akirin1	0.30609
Abhd15	0.305945
Gzf1	0.305816
Map3k14	0.305782
Gm15401	0.30572
Insig2	0.305697
Xrcc4	0.305584
Uba52	0.305556
Hdhd3	0.305526
D11Wsu47e	0.305497
Purg	0.305343
Vmp1	0.305304
Ndufb9	0.305303
Maf	0.305168
Sigmar1	0.305091
Cyr61	0.30508
Rgp1	0.305071
Pgm3	0.30504
2610528A11Rik	0.305036
Mlx	0.304651
Ate1	0.30465
Ube2d3	0.304607
Apool	0.304548
Slc35f5	0.304429
Pde4dip	0.304428
Usp22	0.304424
Slc27a4	0.304225
Gfra1	0.303791
Flot1	0.303552
Usp33	0.303366
Edf1	0.303289
Map1lc3a	0.303147
Ensa	0.303121
Arl6ip6	0.303085
Asnsd1	0.303067
BC031181	0.302996
Slc1a1	0.302728
Nupl1	0.302512
Cpeb3	0.302454
Slc25a30	0.302347
Bcl2l2	0.302327
Armcx5	0.302233
Nt5dc3	0.302082
Il1rn	0.302014
Cd247	0.302005
Abl2	0.301857
Eif3d	0.301664
Prpf40b	0.301476
Mtx2	0.301451
Mrpl51	0.301341
Gnb5	0.301116
Pmm1	0.301005
Dnaja2	0.300884
Polr2i	0.300774
9630033F20Rik	0.300756
Pomgnt1	0.300662
Ramp1	0.300572
Ube2j1	0.300527
1810022K09Rik	0.300447
Zfp219	0.300297
Fosl1	0.300255
Prkch	0.300176
Mir22hg	0.300099
Naa20	0.299974
Dmtf1	0.299816
Ik	0.299728
Casc4	0.299473
Cog6	0.299222
Rps17	0.299129
Cops2	0.299117
Smo	0.299078
B4galt2	0.29883
Slc25a23	0.298818
Gm14326	0.298754
Ccdc157	0.298575
Aplp1	0.29854
Rfx8	0.29839
Socs3	0.298356
Setd5	0.298306
Chmp2b	0.298225
Susd2	0.298169
Mrrf	0.2979
Mob1b	0.297711
Fam179b	0.297651
H13	0.297622
Zfp672	0.297602
Ahcyl1	0.297519
Zfp383	0.297415
Ksr2	0.297414
Slc7a6	0.297386
Pi4k2a	0.29726
2005-03-01	0.297227
Myo10	0.297216
Myo1c	0.296811
2015-09-01	0.296703
Adssl1	0.296687
Bag4	0.296659
Lpar3	0.296618
Baz2b	0.296524
Rtn3	0.296491
Mpp4	0.296293
Ogt	0.296265
Rps29	0.296233
Zcrb1	0.296166
Uchl3	0.296123
Spn	0.296102
Araf	0.296012
Zfp119a	0.295985
Cdr2	0.295963
Usp47	0.295888
Mif4gd	0.295845
Rad17	0.295821
Nufip2	0.29578
Myo5a	0.295746
Hsd17b4	0.295678
Mrpl32	0.295579
Lsm1	0.295504
Brwd1	0.295499
Zfp275	0.295452
Pdia5	0.295403
Txnl1	0.295285
Tbc1d25	0.29507
Inhba	0.294877
Atp6v0c	0.294765
2210408I21Rik	0.294691
Crip2	0.294571
Slc5a3	0.294538
4930455C13Rik	0.294357
Sbf2	0.294112
Rin2	0.294001
Nfs1	0.293937
Timm23	0.293884
Aimp1	0.293814
Spred1	0.2937
Sgip1	0.293585
Gm10516	0.293377
Chrnb1	0.29331
Zfp637	0.293258
Vps29	0.293188
Elovl1	0.29282
Btg1	0.292726
Klc1	0.292498
Hspa13	0.292416
2900011O08Rik	0.292395
Senp6	0.29234
Dusp16	0.292269
Npm1	0.292255
Agpat4	0.292234
2700062C07Rik	0.292124
Snx16	0.292103
D15Ertd621e	0.292035
Eif5	0.291842
Fbxo2	0.291692
Eif5a2	0.291666
Bbs5	0.291401
Ccdc66	0.291387
Cdc123	0.291217
Pak2	0.291215
Laptm4b	0.291211
2310047M10Rik	0.29121
Sgsm3	0.291105
Kank2	0.291062
Pex12	0.290963
Drg1	0.290929
Zfp397	0.290712
Tmtc2	0.290521
Ippk	0.290434
9030619P08Rik	0.290362
Smarcd1	0.290063
Slc25a39	0.290038
AU022252	0.289974
Aktip	0.289903
Rdx	0.289561
Cd200	0.289436
Dgkq	0.28935
Arih1	0.289329
Sbds	0.289301
Nrd1	0.289187
4930483K19Rik	0.288977
Usp16	0.288922
Papd4	0.288896
Myeov2	0.288838
Ppp1r11	0.288777
Etv1	0.28871
Sec16a	0.288431
Spred3	0.288296
Gorasp2	0.288291
Selk	0.288259
Camsap1	0.288208
Dcaf12	0.28812
Gtf2ird1	0.288113
Ndufc2	0.288024
Prpsap1	0.288014
Ak1	0.287698
Otud3	0.287664
Clk3	0.287664
Gm13034	0.287629
Mfsd7b	0.287473
Kbtbd4	0.287467
Stat5a	0.287456
Fam96b	0.287443
Ttc3	0.287427
Dock6	0.287249
Mcam	0.287216
Mapkapk5	0.287006
Hipk2	0.286893
Pdpk1	0.286841
Aldh7a1	0.286612
Cebpd	0.286353
Lgals4	0.286093
Tmem39a	0.286089
Eif3h	0.286075
Bdp1	0.285882
Slc25a13	0.28586
Ssb	0.285822
Vcl	0.285756
Ppp2r2a	0.28571
Mphosph10	0.285662
1810032O08Rik	0.285642
Pcdhgc3	0.285575
Gpd1	0.285461
Rrp8	0.2854
Tmem127	0.285272
Phf17	0.285009
Ube3a	0.28491
Zfp560	0.284752
Ano1	0.284714
Wdr33	0.284581
Tmem35	0.284419
Cwf19l2	0.28433
Ctif	0.283894
Srp9	0.283807
Atp1a2	0.283806
Esf1	0.283704
Gna12	0.28366
Pno1	0.283588
Ap1g1	0.283585
Plxna1	0.283496
Rc3h1	0.283333
Mrpl17	0.283309
Amz1	0.283144
Pcdhgb2	0.283086
Cops6	0.283068
Chpt1	0.283043
Drg2	0.282926
Pde5a	0.282908
Cul3	0.282776
Nop14	0.282683
Eif2b3	0.282616
Fam122a	0.282564
Zfp691	0.282512
Slc10a3	0.282503
Arl13b	0.282408
Vkorc1	0.282335
Amfr	0.282129
Api5	0.282046
Skil	0.282025
Unc119b	0.281671
Kazald1	0.281607
Vwa5a	0.281545
Sod2	0.281542
Esd	0.281517
Ttc37	0.281471
Wdr61	0.281431
Maml2	0.281429
Qsox2	0.281227
St6galnac6	0.281111
Mycbp	0.281045
Zc3h11a	0.281015
Csrnp2	0.280916
Vcp	0.280859
Nat2	0.280852
Txndc5	0.280758
Leprel2	0.280697
D3Ertd254e	0.280677
Smurf1	0.280582
Capza1	0.280526
Col15a1	0.280332
Paics	0.280278
Rgs16	0.280276
Ndufaf1	0.280104
Rnf115	0.279791
Ptpmt1	0.279733
Ndufa1	0.279696
Zfp651	0.279688
Fbxo11	0.279648
Zfp82	0.279562
Rwdd4a	0.279552
Fam131a	0.279467
Fam167a	0.279325
Taf1	0.279214
Dnmt3b	0.279201
Atxn7l3	0.27918
Timm17b	0.279142
Slc25a4	0.278993
Gt(ROSA)26Sor	0.278923
Nedd8	0.278724
Ywhag	0.278641
Acpp	0.278608
Gm15706	0.278436
Dnahc11	0.278426
Atp6v1b2	0.278403
Gmeb2	0.278369
Ddx42	0.278337
Ttc4	0.278068
Hspa8	0.278061
Usp53	0.277958
Cul2	0.277644
Zfp263	0.277232
Tsta3	0.276509
Naa25	0.27645
Golgb1	0.276342
Zbtb1	0.276193
Clasp2	0.276051
Sec63	0.276047
Pdgfc	0.275888
Pias4	0.275869
Plod3	0.275757
Sh2d2a	0.275705
Ppp2ca	0.27569
Bloc1s2a	0.275678
Sfr1	0.275416
Gfer	0.275415
Crabp2	0.275275
Tut1	0.275254
Atp6v1a	0.275203
Slc39a1	0.27472
Frs3	0.274699
R74862	0.274685
Spsb2	0.274676
Guca1a	0.274626
Senp2	0.274609
Mphosph8	0.274535
Ikzf3	0.27451
Efnb3	0.274484
Emc4	0.274404
Rnf103	0.273845
Psmc6	0.273721
Tmem214	0.273668
Srp54b	0.273546
Mob3b	0.273535
Tmem216	0.273341
Ufsp1	0.273322
Dpp8	0.273114
Mfap1b	0.273108
Sucla2	0.273099
Ginm1	0.272829
Stard5	0.27279
Pacsin3	0.272713
Sh3rf1	0.272488
Mrps2	0.272485
Gm14325	0.272458
Wdr20a	0.27245
Rbm12b2	0.272329
Mettl5	0.271983
Btrc	0.271983
Sec31a	0.271914
Nudt22	0.271842
Fam193a	0.271637
Prrc2a	0.271599
Herpud2	0.271575
Impa1	0.271433
Gm16861	0.271279
Zfp438	0.271197
Cct2	0.27115
Gspt1	0.271045
Ctsb	0.270904
Taf2	0.270887
Slc12a2	0.270838
Tm9sf3	0.270766
Apol9b	0.270675
Lgmn	0.270589
Wdyhv1	0.270516
Ndufb11	0.270284
Rnf111	0.27024
Mrps5	0.27016
Tomm70a	0.270108
Zfp251	0.270023
Efna5	0.270019
Pdcd10	0.270002
Cltc	0.27
Zfp449	0.269916
Spsb1	0.269901
Ptpn22	0.269894
1700088E04Rik	0.269858
Nr2c1	0.269852
A230072C01Rik	0.269745
Vangl1	0.269721
Bmi1	0.269643
Fxyd1	0.269627
Nckap1	0.26961
Rhoc	0.269385
Psmd8	0.269311
Tg	0.269266
Tmem183a	0.269135
Gnas	0.26908
Ssr3	0.269076
Cblb	0.269022
Nkrf	0.268839
Fitm2	0.268815
Capn11	0.268676
Hic2	0.26845
Lamc1	0.268395
Sgtb	0.268316
Spats2	0.268311
Ttyh1	0.268274
Gypc	0.268258
Eif2b4	0.268183
Zfp770	0.268136
Alkbh8	0.26787
Prkaca	0.267793
Intu	0.267786
Mrps36	0.267689
Snora26	0.267585
Rb1cc1	0.26735
C1galt1c1	0.267343
Rock2	0.267334
Chpf2	0.267134
Ptp4a1	0.266993
Prune	0.266942
Stoml2	0.266906
Trip11	0.266868
E2f5	0.266822
Mrps33	0.266593
Thap6	0.266419
Kif1b	0.266273
Dad1	0.266224
Usp7	0.266162
Pdia6	0.266133
St6galnac3	0.265958
Dctn2	0.265958
Nck1	0.265826
Pik3r3	0.265723
Qprt	0.265709
Psme4	0.265646
Mrpl41	0.265546
Mtrf1l	0.265083
Tcf7l1	0.265046
Trpt1	0.265007
Rpl41	0.264913
Fcf1	0.264908
Galm	0.264836
Zfp703	0.264523
Zfp90	0.264348
Itga10	0.264348
Gpr83	0.264132
Ggt5	0.264041
Snrpa1	0.263903
Pabpc4	0.263861
Gtf2f2	0.26384
Cbwd1	0.263801
Gcsh	0.263797
Pgrmc1	0.263738
Tank	0.263707
Psmb6	0.263602
Eif2b5	0.263522
Mpi	0.26352
Grhl1	0.263244
Rbm7	0.263069
P2ry2	0.263048
Dlgap4	0.263026
Arl2	0.263011
Cdc14a	0.262855
Atp6v1h	0.262786
Cd3d	0.262746
Glul	0.262496
Ywhah	0.262485
Axl	0.262478
BC026585	0.262304
Il6st	0.26226
Selp	0.2622
Snhg5	0.262196
Map3k6	0.262127
Notch3	0.262038
Eml5	0.262
Klhl2	0.261843
Zscan22	0.261799
Fam199x	0.261742
Polr1c	0.261606
Sco2	0.261467
Pptc7	0.261404
Phf7	0.261303
Man1a2	0.261273
[truncated: 10,743 more rows]
