# Supplementary material for: c-Maf controls immune responses by regulating disease-specific gene networks and repressing IL-2 in CD4+ T cells
Source: Springer Nature journal article supplement (doi:10.1038/s41590-018-0083-5), 2018-04-13
Supplement: MOESM4 [file 41590_2018_83_MOESM4_ESM_Supp_T_2.xlsx]

## Sheet: PC genes
PC.1.pos	PC.2.pos	PC.4.pos	PC.1.neg	PC.2.neg	PC.4.neg
Gm6161	Sgk3	Nck2	Gm15604	Il17a	Lactb2
Mybl1	Smt3h2-ps4	Ica1l	Prex2	Dst	2010300C02Rik
Arfgef1	Il1rl2	Icos	Gm2710	Neurl3	Uxs1
Ncoa2	Gm8210	Il10	Il17a	Actr1b	Col3a1
Tram2	Tmem163	Ctse	Il17f	Rnf149	Tmem237
Kcnq5	Fam72a	Zfp281	Ogfrl1	Il1r2	Ndufs1
Fam168b	Gm15454	Nek7	Gm19680	Il1rl1	Map2
Uggt1	1700025G04Rik	Prg4	Bend6	Bivm	Acadl
Tmem131	Slamf7	Ifi204	Gm6428	Col3a1	Serpine2
Map4k4	Atp1a2	Sccpdh	Npas2	Gm8420	Psmd1
Tgfbrap1	Desi2	Angptl2	Il1r2	Cflar	Ptma
Col3a1	Gm13292	Neb	Il1r1	Rps27-ps1	Gpc1
Myo1b	Nrarp	Arl5a	Gm16103	Fn1	Rnpep
Pgap1	Gm13464	March3	Gm8420	Tmbim1	Phlda3
Plcl1	Gm13546	Dpp4	Dnah7a	Gm17181	Cacna1s
Trak2	Gcg	Gcg	Gm11599	Ramp1	Lamc2
Fzd7	Stk39	Rapgef4	Rps27-ps1	Pdcd1	Lamc1
Bmpr2	Cers6	Gpr155	Gm5528	Rnf152	Rgs16
Raph1	Scrn3	Slc43a1	Slc11a1	Tnfrsf11a	Xcl1
Gm26649	Pak6	Eid1	Serpine2	Mgat5	Uap1
Fzd5	Bambi-ps1	Smox	Gm5529	Chil1	Atp1a2
Pikfyve	Gm14085	Tox2	Gm17181	Nav1	Tagln2
Rpl31-ps14	Slc30a4	Mmp9	Ramp1	Cfh	Mnda
Bard1	Acoxl	Bmp7	Bcl2	Trove2	Fh1
Atic	Gm14036	C030034L19Rik	En1	Rgs2	Adss
Ctdsp1	Gm11687	Pde7a	Slc26a9	Gm7278	Smyd2
Utp14b	Zcchc3	Il21	Ppfia4	Soat1	Lamb3
Ap1s3	Mmp24	Mcl1	Gm16305	Gm5265	Sephs1
Trip12	Gm14438	Plekho1	B3galt2	Aim2	Optn
Per2	Gm10259	2010016I18Rik	Gm8818	Psen2	Nudt5
Pign	S100a8	Dennd2d	Fasl	Atf3	Il2ra
Cxcr4	Cdc42se1	Usp53	Creg1	Gm13198	Trdmt1
Rpl31-ps9	Tspan2	Prss12	Gm5265	1700061F12Rik	Vim
Ppp1r15b	Gpsm2	Tspan5	Fcgr2b	Gata3	Anapc2
Kif21b	Extl2	Bach2	Fcgr3	Gm13321	Set
Kif14	Gm4617	Zfp292	Fcer1g	Mrc1	Fam129b
Gm15583	Gbp3	Gm12543	Slamf8	Ralgds	Hc
Dhx9	Gbp2	Padi4	Kmo	Hc	Pdcl
Cep350	Faxc	Samd11	Rbm8a2	Gsn	Gm13461
NA	Gm11249	Cdk6	Smyd3	Gm13437	Galnt3
Rc3h1	Raver2	Rundc3b	Gm5561	Acvr2a	Lnp
Tnfsf4	Zfp69	Bmp2k	Gm5069	Kif5c	Dnajc10
Gm16565	Gm12896	Gbp11	Hsd11b1	Gm13498	Slc43a3
Uhmk1	Marcksl1	Plcxd1	A330023F24Rik	Rnd3	Ssrp1
Gm10521	Smpdl3b	A630023P12Rik	Gm13181	Gm13549	Trp53i11
Ahctf1	Rpa2	Miat	Gm13198	Ldha-ps	Ccdc34
Itpkb	Themis2	Sh2b3	Gm13292	Tank	Rad51
Arhgap21	Phf13	P2rx7	Gm13321	Myo3b	Pdia3
Man1b1	Sh3bp2	Por	Gm13315	Ttn	AA467197
Notch1	Bend4	Glcci1	Gm13365	Itgav	Sema6d
Ntng2	Gbp4	Gadd45a	Nebl	Calcrl	Dut
Rapgef1	Gbp11	Raf1	Gm13337	Cd82	Ttl
Sptan1	Ccdc18	St8sia1	Gm13331	Accs	Cst7
Tbc1d13	Miat	Cyp2s1	Fut7	Prr5l	E2f1
Slc39a1-ps	Dtx1	Cebpa	Bmyc	Cd44	Sulf2
Nup188	Rad9b	Nav2	Qrfp	Gm13935	Vamp7-ps
Ass1	Ncf1	Gm26827	Lhx6	Thbs1	Zbtb46
Eng	Flt3	Arnt2	Gm13437	Sema6d	Tnfsf10
Stxbp1	Igf2bp3	B4galnt4	Nek6	Hdc	Gpr160
Zbtb34	Nod1	Tnfrsf26	Gm13464	Gm14098	Plk4
Phf19	Il12rb2	Tdrp	Gm13508	Plcb4	D3Ertd751e
Dab2ip	Igkc	Podnl1	Gm13498	Jag1	Dclk1
Cobll1	Gcfc2	Zswim4	Ermn	Gm11759	Mbnl1
Ubr3	Zfand4	Maf	Gm13549	Thbd	Slc33a1
Tlk1	Rasgef1a	Cpne7	Ldha-ps	Cd93	Hdgf
Dync1i2	Gm10420	Cxcr5	Gm13573	Slc52a3	S100a6
Ccdc141	Gm20531	Pou2af1	Gm13602	Srxn1	Phgdh
Chrm4	Lpar5	Coro2b	Gm13623	Gm14165	Fam19a3
Gm9821	Klrb1c	Myo6	Gm13632	Sdc4	Psrc1
Zfp770	Klrc2	Nt5e	Cerkl	Cass4	1810037I17Rik
Fam98b	Klrc1	Slc9a9	Gm13675	Bmp7	Sec24d
Bmf	Gpr19	Ltf	Gm13684	Pmepa1	Hadh
Bahd1	Eps8	Vipr1	Gm13743	Edn3	Ppp3ca
Ino80	Lair1	Ccr2	Spi1	Lama5	H2afz
Zfp106	Ube2s	Cdh23	Gm13812	Rps24-ps2	Ifi44
Map1a	Igsf23	Vsir	Gm13880	Lrrcc1	Zranb2
Stk35	Nccrp1	Itga7	Cd59a	Tnfsf10	Penk
Rnf24	E130208F15Rik	Tespa1	Rcn1	Gm12583	Gem
Rassf2	Cd22	Lif	Gm13935	Spry1	Cdh17
Slc23a2	Mctp2	Nsg2	Frmd5	Rpl32-ps	Atp6v0d2
Plagl2	Rpl17-ps10	Rnf145	9830144P21Rik	Fcrl1	Coq3
Chmp4b	Tm6sf1	Tcf7	Spcs2-ps	Pear1	Nudt2
Raly	Gm7027	Il4	Gm14046	Crabp2	Coro2a
Ncoa6	Art2b	Myh3	Smox	Lmna	Tbc1d2
Ralgapb	Hbb-bt	Fam101b	Prnp	Adam15	Bspry
Pigt	Hbb-bs	Ssh2	Gm14098	She	Alg6
B4galt5	Rras2	Mmd	Rps19-ps7	Rplp0-ps1	Foxd2os
Adnp	Eri2	Pecam1	Gm11759	Rorc	Cmpk1
Zfp217	Mylpf	Pitpnc1	Gm14131	Chia1	Rad54l
Rbm38	Itgam	Fam20a	Gm14127	Chil3	Ipp
Vapb	Itgad	St6galnac1	Trib3	Gm16238	Ctps
Zfp831	Rasa3	Timp2	Gm14165	Npnt	Zmpste24
Edn3	E030037K01Rik	Slc26a11	Gm14227	Wls	Yars
Gm14391	Gm10282	Mafg	Gm14251	Penk	Rbbp4
Rps8-ps2	Nudt21	Grhl1	Gm14253	Gm11814	Atpif1
Lsm14b	Mt3	Bzw2	Gm14231	Rps11-ps3	Smpdl3b
Rps21	Dync1li2	Tgfb3	Snhg11	Tmem64	Fgr
Helz2	Tubb3	Evl	Sdc4	Rragd	Aim1l
Gmeb2	Hspa8	Cd83	Sulf2	Gm12492	Cep85
Zbtb10	Tmprss13	Mylip	Cebpb	Tgfbr1	Runx3
Zmat3	NA	Pcsk1	Gm14263	Gm12482	Clic4
Setd7	Dapk2	Enc1	Gm14336	Gm12468	Padi2
Dclk1	Fbxl22	Fcho2	Rps24-ps2	D630039A03Rik	Gm26880
Kpna4	Pxylp1	Parp8	Gpr160	Rpsa-ps11	Gm13140
Fhdc1	Ngp	Dnase1l3	Gm12583	Tnfsf8	Gtpbp10
Lrba	Gm5921	Kctd6	Gm12565	Aldoart1	Fam185a
Prcc	Eomes	Sh3bp5	Mgarp	Ttc39b	Abcb8
Iqgap3	Gm10157	Rnase4	Lxn	Plin2	Tyms
Thbs3	Cx3cr1	Zmym5	Rpl32-ps	Gm12643	Ept1
Il6ra	Rpsa	Wdfy2	S100a8	Gm12846	Ppm1g
Slc39a1	Ust	Tbc1d4	Rplp0-ps1	Gm12852	Lap3
Dennd4b	Enpp1	Gm26778	Rorc	Slc2a1	Slc34a2
Pogz	Echdc1	NA	Lingo4	Gm13215	Rbm47
Gabpb2	Prf1	Sepp1	Tdrkh	Ncmap	Nfxl1
Sv2a	Mif	Card6	Gm5070	Gm12987	Gm15653
Bcl9	Chchd10	Matn2	Ecm1	Rpl38-ps1	Paics
Notch2	1500009L16Rik	Rnf19a	Ankrd35	Camk2n1	Hopx
Atp1a1	Gm26596	Vdr	Cd160	Gm25732	Rassf6
Trim33	Ifng	Lmbr1l	Gm6485	Ccnd3-ps	Plac8
Slc16a1	Plek	Slc11a2	Chil3	Padi2	Hpse
AI504432	Hba-a1	Abcc5	Gstm5	Gm13050	Pus1
Celsr2	Havcr2	Lpp	Pde5a	Spsb1	2900026A02Rik
Fam102b	Gm12174	4932438H23Rik	Gm16238	Fgl2	Rfc5
Slc35a3	Gm12286	Ifngr2	Gm9387	Pisd	Nos1
Cyr61	Tax1bp3	H2-Q2	Mcoln2	Slc34a2	Ran
Lpar3	Ccl3	Ehd3	Gm10287	Rbpj	Tpst1
Fam73a	Ccl4	Map4k3	St6galnac3	Gm6517	Ncf1
Impad1	Gm20390	Arhgap12	Penk	Kdr	Rfc2
1110037F02Rik	Tbx21	Camk4	Gm11814	Igfbp7	Eif4h
Gm12397	Tbkbp1	Tnfaip8	Rps11-ps3	Mkrn1-ps1	Hip1
Nr4a3	Plxdc1	Snx2	Gm11836	Cxcl5	Lrwd1
Rad23b	Rpl19	Frat2	Gm11868	Cxcl3	Dnaaf5
Gm12505	Arl4d	Ubtd1	Pnrc1	Cxcl15	Adap1
Ptbp3	Slc4a1	Nanos1	Gm12389	Cxcl2	Eif3b
1700018M17Rik	Kpna2	Sh2d1a	Aqp3	Areg	Chst12
Hook1	Gm6682	Mpp1	Cd72	Antxr2	Kdelr2
Dnajc6	Rps29		Ccdc107	Sparcl1	Wdr95
Usp24	Ston2		Fam221b	Spp1	Rfc3
Dhcr24	Moap1		Gm12492	2900026A02Rik	Rpa3
Kdm4a	Serpina3f		Gm12466	Vsig10	Cav2
Szt2	Wdr25		Gm12482	Gm6444	Mpp6
Cap1	A230065H16Rik		Gm12468	Ccl24	Osbpl3
Pabpc4	Igha		Wdr31	Plod3	Chn2
Fhl3	Dnah11		Aldoart1	Col1a2	Gars
Thrap3	Prss16		Gm12912	Gm27018	Ggcx
Ago1	Fam65b		Gm11246	Cav1	Rpn1
Gm12928	Serpinb6b		Gm11263	Hilpda	Mkrn2os
Kpna6	Serpinb9		Gm12632	Dgki	Klrg1
Phactr4	Serpinb9b		Gm12643	Creb3l2	BC064078
Fam76a	Tubb2b		Jun	Tmem176b	Gabarapl1
Ahdc1	Psmg4		Gm12852	Rps15-ps2	Klrk1
Wasf2	Cks2		Gm12726	Gm4761	Klrc2
Wdtc1	Hrh2		Gm12728	Sftpb	Klrc1
Sfn	Gm16249		Gm12727	Sema4f	Strap
Ubr4	Zfp825		Tmem59	Slc6a6	Bcat1
Crocc	Rps23		Gm12906	Il17re	Myadm
Ddi2	Mrps36		Rnf11	Pparg	Ehd2
Rsc1a1	Gzmk		Gm12818	Mgp	Axl
Clcn6	Dnase1l3		Ccdc17	Gm15707	Snrpa
Mtor	Gm20678		Plk3	Gm15720	Lgals7
Casz1	Trav5-4		Gm12892	Axl	Zbtb32
Tnfrsf14	Gzmb		Gm12900	Rasgrp4	Lsr
Agrn	Trim13		Gm12922	Clip3	Ccne1
Gatad1	Dock5		Sytl1	Dpy19l3	Siglecf
Cd36	Serp2		Gm13213	Grin2d	Etfb
Il6	Dgkh		Zfp683	Slc17a6	Napsa
Hadha	Gm10076		Gm12988	Cyfip1	Dkkl1
Cad	Tpm3-rs7		Gm13007	Fah	Fancf
Fosl2	Gpr18		Gm12987	Kctd14	Gas2
Ppp1cb	Ncald		C1qb	Ints4	Chsy1
Depdc5	Ly6c2		C1qc	Dgat2	Lrrk1
Htt	Cacna1i		Rpl31-ps10	Neu3	Alg8
Man2b2	Nup50		Sh2d5	P4ha3	Pold3
Pds5a	Amigo2		Rpl38-ps1	AA474408	Mical2
Aff1	Tuba1c		Gm25732	Dkk3	Cog7
Hsd17b11	Mpv17l		Ccnd3-ps	Calca	Lcmt1
Lrrc8b	Iqcg		Gm13047	Itpripl2	Itgax
Golga3	Spice1		Tmem51	Gsg1l	Tacc2
Pole	Snx9		Camta1	Adam8	Stk32c
Ep400	Dynlt1a		Tnfrsf25	Col4a1	Ifitm3
Ttc28	Dynlt1f		Gm13132	Rab20	Dusp4
Ung	Paqr4		B930041F14Rik	Plat	Zdhhc2
Acacb	Gm16279		Gm10482	Rab11fip1	Colgalt1
Rab35	Gm10499		Gm16288	Ppp1r3b	F2rl3
Oas3	Enpp4		Gm15796	Dnase2a	Clgn
Kdm2b	Apobec2		Cd38	Rbl2	Asf1b
Setd1b	Rpl36		Gm5292	Cdh1	Orc6
Kntc1	Xdh		Rbm47	Cpne7	Mt3
Ncor2	Spast		Gm6517	Gm10180	Mt2
Clip2	Haao		Gm15653	Dscaml1	Mt1
Ccl24	C430042M11Rik		Igfbp7	Sik2	Cdh5
Ywhag	Dntt		Mkrn1-ps1	Gm15625	Enkd1
Serpine1	Add3		Cxcl2	Cyp11a1	Mlkl
Zan	Rnf113a1		Gm5558	Stra6	Kars
Gnb2	Gm14633		Gm2986	Hacd3	Wwox
Nyap1	Gm8172		Gm5560	Rora	Cmc2
Ints1	Siah1b		Spp1	Myo1e	Mphosph6
Ttyh3	Kdm5d		Rps19-ps8	Fam46a	Klhdc4
Tnrc18	Eif2s3y		Gm8508	Nt5e	Pde4a
Lmtk2	Uty		Ccdc63	Ctsh	Dpy19l1
Bri3	Ddx3y		Hvcn1	Gm17041	Thyn1
Trrap			Gm15846	Ccr4	St14
Zscan25			Gm6444	Vill	Nrgn
Usp12			Gm6139	Ccr8	Dpagt1
Gm10167			Phkg1	Ccr1	Dscaml1
Slc7a1			Lat2	Perp	Exph5
Smo			Gm16061	Arg1	Cib2
Nup205			Rasa4	Cd164	Lrrc49
Luc7l2			Pilra	Reep3	Tipin
E330009J07Rik			Fam20c	Col6a1	Dapk2
Aqp1			Alox5ap	Col18a1	Rps27l
Rpia			Wdr95	Elk3	Lactb
Rmnd5a			Asns	Atp2b1	Ccnb2
Paip2b			Fam3c	Ptprb	Col12a1
Npm3-ps1			Lncpint	Dtx3	Fam46a
Rab11fip5			Trbv20	Suox	Ryk
Alms1			Tmem176b	Pisd-ps1	Manf
Aak1			Tmem176a	Sfi1	Hyal2
Rab43			Gpnmb	Gatsl3	Cdc25a
Plxna1			Gm17060	Gm11966	Sacm1l
Nup210			Gm4761	Gm11401	Samd3
Setd5			Il23r	Gm12060	Ptprk
Tatdn2			Cd8a	Il9r	Hdac2
Cand2			Capg	Ccng1	Prep
Bcl2l13			Actg2	Mgat4b	Ppa1
Mical3			Vax2	38230	Gstt1
Phc1			Rps19-ps9	Kif3a	Col6a2
Lag3			Mgll	Il4	Col6a1
Ptms			Gm15531	Il13	Icosl
Chd4			Il17re	Il5	Chst11
Ncapd2			Il17rc	Sparc	Hsp90b1
Foxm1			C3ar1	Gm12267	Tmpo
Clec2d			Gm5883	Ncor1	Nudt4
Dusp16			Gm7308	Alox8	Phlda1
Gprc5a			Klrb1c	Mgl2	Nup107
Gm6654			Klrb1b	Itgae	Fignl1
Gm15784			Klrb1f	Gm12328	Lgalsl
Rpl28			Cd69	Tlcd2	0610010F05Rik
Isoc2a			Clec12a	Cpd	Kcnmb1
Zfp628			Klrd1	Ccl8	Atp10b
Zfp865			Klrc2	Ccl1	Adam19
U2af2			Klrc1	Ccl9	Havcr2
Epn1			Gm15707	Ccl6	Canx
Trim28			Bhlhe41	Rnf43	N4bp3
Ehd2			Gm15720	Hlf	Anxa6
Gltscr1			Pirb	Gm11512	G3bp1
Zc3h4			Gm5321	Abcc3	Map2k3
Sympk			C5ar1	Gm11598	Cenpv
Vasp			Bbc3	Jup	Itgae
Mark4			Slc1a5	Kcnh4	Gsg2
Ppp1r37			Gm6065	Itgb3	Ywhae
Irgq			Ppm1n	Ace	Tmem97
Phldb3			Apoc2	Slc25a19	Ccl1
Zfp526			Apoe	Cbr2	Tada2a
Erf			Plaur	Dtnb	Lrrc59
Cic			Pld3	Sdc1	Grb7
Hnrnpul1			Fbxo27	Ahr	Psmd3
Gm10651			Fbxo17	Tspan13	Tubg1
Rps16			Tyrobp	Arhgap5	Psme3
Hnrnpl			U2af1l4	Hspa2	Dcakd
Lgals7			Igflr1	Jdp2	Tanc2
Sipa1l3			Gm4883	Gpr68	Cyb561
Zfp146			1600014C10Rik	Asb2	Gh
Wdr62			Plekhf1	Serpina3n	Cep112
Arhgap33			Nkg7	D430019H16Rik	Kif19a
Kmt2b			Napsa	Vipr2	Nup85
Cebpa			Snord35b	Itgb8	Afmid
Zfp507			Dkkl1	Amph	Slc25a10
Atf5			Saa3	Tcrg-C2	Arhgdia
Scaf1			Siglech	Serpinb6a	Anapc11
Prr12			Isg20	Pxdc1	Pdia6
Lmtk3			Gm6155	Nrn1	Rrm2
Tmem143			4632427E13Rik	Gm2830	Vash1
Nomo1			Dnajb13	Pcsk1	Cpsf2
E2f8			Gm7027	Naip2	Siva1
Rps12l1			Apbb1	Mast4	Crip1
Herc2			Gm9105	Il17rb	Hist1h2bc
Gm7367			Arntl	Chdh	Lrrc16a
Abhd2			Nucb2	Stab1	Gmnn
Ticrr			Lyrm1	1810011H11Rik	Gpld1
Zfp710			Gm9234	Sftpa1	Serpinb9b
Zscan2			Igsf6	Sftpd	Nqo2
Mex3b			Slx1b	Ptger2	Nrn1
Picalm			Ypel3	Ero1l	4930486L24Rik
C2cd3			Bnip3	Rnase2a	Ctla2b
Numa1			Cd163l1	Zfp219	Ctla2a
Nup98			5830411N06Rik	Pck2	Nsun2
Olfr613			Ifitm2	Ltb4r1	Slf1
Tub			Ifitm1	Spryd7	Slc30a5
Ipo7			Ifitm10	Xkr6	Nln
Calca			Gm7290	Sftpc	Cenpk
Smg1			Cd81	Cysltr2	Gzma
Ccp110			Gm1840	Tnfsf11	Itga1
D430042O09Rik			F10	Dab2	Nid2
Nfatc2ip			Gm17149	Ank	Vcl
Atxn2l			Gm21769	Wisp1	Tkt
Maz			Eif4ebp1	Dgat1	Fam213a
Spn			Cpe	Scrt1	Sftpd
Fbrs			Tmem221	Slc52a2	Ear2
Srcap			Slc27a1	Vdr	Phf11a
Fbxl19			Cyp4f18	Lima1	Mipep
Setd1a			Rln3	Krt83	Rai14
Mki67			Gm26532	Rpl39-ps	6030458C11Rik
Fadd			Dand5	Emp2	Ncald
Col4a1			Junb	Gm15564	Nudcd1
Col4a2			Gm6625	Cd200r1	Dscc1
Atp11a			Gm5356	Retnla	Tg
Arhgef10			Lpcat2	Gpr15	Wisp1
Kbtbd11			Ccdc102a	Cldnd1	Apol10b
Zfp703			Adgrg5	Pros1	Il2rb
Tex15			Adgrg1	Samsn1	C1qtnf6
Tnks			Adgrg3	Runx1	Lgals1
D8Ertd82e			Gm8730	Bace2	Pdgfb
Naf1			Gm5915	C2cd2	Tnfrsf13c
Lpar2			Dpep2	Pisd-ps2	Creld2
Plvap			Cdh1	Ccr6	Lrrk2
Gm16091			Hp	Mmp25	Spats2
Eps15l1			Crispld2	Ergic1	Tns2
Otud4			Snai3	Tff1	Rogdi
Gm10644			Rnf166	Tmprss3	Sdf2l1
Samd1			Rab4a	Ier3	Ube2l3
Palm3			Kbtbd3	Gabbr1	Lztr1
Nacc1			Phxr4	Adgrf5	Psmd2
Nod2			Gm5611	Runx2	Rfc4
Rpgrip1l			Gm7808	Ttbk1	Naa50
Ogfod1			Tmem205	Ptprs	Cd200r4
Mt3			Nrgn	C3	Tomm70a
Mt2			Crtam	Crem	Cpox
Cnot1			Gm16214	9430020K01Rik	Nsun3
Cdh5			Amica1	Nr3c1	Chaf1b
Slc9a5			Gm16124	Fem1c	Bace2
Gm10073			Rps6-ps3	Ablim3	Gm15590
Chtf8			Acsbg1	Impa2	Sytl3
Pdf			Gm15625	Tubb6	Metrn
Dhx38			Gm26631	Ldlrad4	Tcf19
Atxn1l			Rps11-ps1	Plcb3	Cchcr1
Phlpp2			Paqr5	Slc3a2	Abcf1
Sf3b3			Uchl4	Scgb1a1	Pkdcc
Ddx19a			Dapk2	Slc15a3	Pigf
Pdpr			Fbxl22	Dtx4	Usp14
Wdr59			Gnb5	Gna14	Pcyox1l
Gan			Lysmd2	Got1	Hsbp1l1
Gse1			Ctsh	Cnnm2	Banf1
Zfpm1			Gm26882	Shtn1	Ctsw
Piezo1			Trf	Foxp3	Ehbp1l1
Acsf3			Hyal1	Dynlt3	Fkbp2
Urb2			Ngp	Syn1	Tmem109
Sprtn			Ltf	Cd99l2	Cep78
Gm17296			Gm26614	Bgn	Tjp2
Mmp10			Tmem42	Pls3	Cbwd1
Gm16568			Ccr9	Chic1	Ak3
Raver1			Cxcr6	Xist	Insl6
Dock6			Ppp1r14c	Cysltr1	Pdcd1lg2
Igsf9b			Gm16148	Sh3bgrl	Gldc
Thy1			Gm8355	Diaph2	Hells
Cbl			Sgk1	Armcx3	Pik3ap1
Hyou1			Gm26740	Rnf128	Gsto1
Bcl9l			Arg1		Rpl13a-ps1
Phldb1			Samd3		Tectb
Ube4a			Ptprk		Acsl5
Rpl10-ps3			Fam26f		Plp2
Pou2af1			Gm16210		Cybb
Atm			Gm26860		Syn1
AY074887			Lilr4b		Smim10l2a
Sema7a			Lilrb4a		Gm14680
Cyp11a1			Rps19-ps10		Vbp1
Arih1			Egr2		Pcyt1b
Tle3			Susd2		Zdhhc15
Anp32a			Gstt1		Magt1
Zfp609			Mmp11		Arxes2
Vps13c			Pcbp3		Prdx4
Rps27a-ps2			Matk		Rbbp7
Msl2			Tbxa2r		Car5b
Dnajc13			Slc41a2
Rad54l2			Tcp11l2
Ip6k2			Lyz2
Plxnb1			Il22
Ptpn23			Iltifb
Setd2			Gm20746
Tmie			Selm
Als2cl			Gm11966
Clasp2			Gm11401
Zc3h12d			Gm12003
Plagl1			Gm12009
Rps12			Gm12060
Slc16a10			Rpsa-ps5
Bend3			Gm12091
Ranbp2			Gm12094
Ddit4			Fam196b
Eif4ebp2			Gm12164
Ddx21			Gm12168
Bcr			Gm12174
Adora2a			Gm12176
Zfp280b			Tgtp1
D10Jhu81e			Tgtp2
Trappc10			Csf2
Arid3a			Gm12225
Stk11			Gm12242
Cbarp			Gm12267
Midn			Trim16
Mknk2			Gm12286
Dot1l			2810001G20Rik
Eef2			Cd68
S1pr4			Cxcl16
Nt5dc3			Spns3
Utp20			Gm12328
1500026H17Rik			Trp53i13
Osbpl8			Abhd15
Helb			Gm10392
Tbc1d30			Gm12734
Rassf3			Aldoc
Mon2			Unc119
38411			Ccl2
Agap2			Ccl1
Mbd6			Ccl5
R3hdm2			Ccl6
Zbtb39			Ccl4
Baz2a			Wfdc17
Gls2			Rpl13-ps1
Ankrd52			Gm11478
Pa2g4			Gm11512
Rab5b			Pdk2
Pym1			Abi3
Zmiz2			Gm11517
Tbrg4			Nr1d1
Gm12013			Gm11598
Spred2			Gm12349
Psme4			Adam11
Cpeb4			Gm26668
Pank3			Gm11662
Gm16033			Gh
Cyfip2			Cd79b
Fndc9			1700012B07Rik
Gm12191			Cd300lf
Maml1			Hid1
Jade2			Smim5
Il4			St6galnac1
Il13			Gm8624
Il5			Gm11769
Slc36a1			Cd7
Smcr8			Gm11793
Myh3			Ogfod3
Myh10			Gm17541
Pfas			Rps11-ps4
Borcs6			Gm26517
Gucy2e			Rpl18a-ps1
Chd3			Nfkbia
Polr2a			Aldoart2
Nlgn2			Gm6316
Neurl4			Pygl
Dlg4			Gm26623
Pelp1			Gm5436
Mink1			Slc25a29
Kif1c			Ckb
Mybbp1a			Adssl1
Zzef1			Pld4
Mnt			Klf6
Sgsm2			Actn2
Prpf8			Edaradd
Ankrd13b			Tcrg-C1
Phf12			Hist1h2ao
Supt6			Gm11281
Ksr1			Hist1h1e
Nf1			C530050E15Rik
Rab11fip4			Serpinb1a
Cdk5r1			Pxdc1
Ap2b1			F13a1
Taf15			Ly86
Synrg			Gcnt2
Acaca			Fam120aos
Myo19			Ninj1
Med13			Card19
Prr11			Susd3
Cuedc1			Gadd45g
Trim25			Gm2830
Gm11518			Tgfbi
Wfikkn2			Etohd2
Acsf2			Gm20563
Col1a1			Gm5451
Ppp1r9b			Gm9625
Sp6			Pou5f2
Gm11532			Gm8399
Kpnb1			Mef2c
Pip4k2b			Gm26527
Cdk12			F2rl2
Med24			Rps3a3
Jup			Plk2
Rab5c			1700110I01Rik
Vat1			Slc25a5-ps
Brca1			Gm3839
Mpp2			Gm26772
Atxn7l3			Eif1-ps1
Fmnl1			Gm7206
Cdc27			Gm1821
Ace			Rnase6
Dcaf7			Trav3-1
Axin2			Rps19-ps2
Rpl38			Trav3d-3
Gm26613			Trav14d-3-dv8
Caskin2			Trav17
Cbx4			Traj23
Rnf213			Ltb4r1
Fasn			Rpl13-ps3
Dnajc27			Gm9013
Itsn2			9930012K11Rik
Pum2			Lpar6
Gen1			Rgcc
Asap2			Gm10076
Cog5			Spry2
Sostdc1			Mir17hg
Vcpkmt			Gpr183
Sptb			Clybl
Max			Lifr
Zfyve26			Acot10
Elmsan1			Gm6576
Nek9			Ncald
Vash1			Rps19-ps5
Tmed8			Klf10
Ccdc88c			Gm5045
Atxn3			Ly6d
Syne3			Ly6i
Ccnk			Smpd5
Dync1h1			Rps6-ps1
Tecpr2			Apol7a
Cdc42bpb			Apol9a
Zbtb42			Apol7b
Gpr132			Apol7e
Mta1			Apol9b
Ncapg2			Card10
Rapgef5			Gm8444
Heatr1			Bik
Cdk13			Prr5
4930470G03Rik			Gm10923
E2f3			Gm8973
Dsp			Spats2
Phf2			Gm4468
Fam120a			Krt83
Rnf44			Krt18
Unc5a			Socs1
Prr7			Gm7638
Klhl3			1700056N10Rik
Hnrnpa0			Tmem191c
Ptch1			Gm4943
Tppp			Gm15696
Ttc37			Iqcg
Arrdc3			Itgb5
Homer1			Gm15564
Gm26619			Cd86
Gm9828			Ildr1
Tnpo1			Popdc2
6430562O15Rik			Gm26732
Il6st			Cd96
Flnb			Trat1
Dnase1l3			Gm15518
Zswim8			Gm6767
Anxa11			Gm7860
Cacna1d			Gm15590
Ankrd28			Ccr6
Ercc6			Gm26384
Zfp488			Prss30
Sftpa1			Syngr3
Styx			Rgs11
Chd8			Gm16580
Cdh24			Dusp1
Parp4			Gm8225
Kif13b			Tulp1
Zfp395			Tff1
Egr3			Cyp4f16
Sftpc			H2-Ke6
Slc25a30			H2-Ab1
Akap11			H2-Aa
Diaph3			Prrt1
Gm26778			Cfb
Farp1			C2
Stk24			Gm20547
Lmbrd2			Ly6g5b
Drosha			Ltb
Trio			Lta
37315			H2-Q1
Rpl30			Dpcr1
Pabpc1			H2-Bl
Ubr5			Gm8815
Rad21			Gm7030
Zhx2			Gm9574
Gm17035			Gm8909
Ago2			H2-T3
Them6			Gm8835
Zfp41			Gm5967
Scrib			Pla2g7
Recql4			Gm5093
Myh9			Trem2
Mpst			Ebi3
Ddx17			Adgre1
Sun2			Gm17228
Ep300			Gm26510
Zc3h7b			Gm4707
Srebf2			Gm6548
Tcf20			Qpct
Celsr1			Galm
Sbf1			Haao
Alg10b			Gm7502
Hdac7			Cables1
Adcy6			Gm10269
Kmt2d			Egr1
Tmbim6			Gm5239
Acvr1b			Hbegf
Espl1			Cd14
Sp1			Rps19-ps13
Cbx5			Gm5507
Slx4			Gm4951
Tfap4			F830016B08Rik
Vasn			Cd74
Snn			Ablim3
Marf1			Adrb2
Prkdc			Tubb6
Pi4ka			Tcf4
Crkl			Rnf165
37134			Hsbp1l1
Hira			Cd226
Eif4g1			Unc93b1
Atp13a3			Cnih2
Fam43a			Ctsw
Senp5			Fth1
Pak2			Ms4a4c
Ubxn7			Rorb
Tfrc			Anxa1
Polq			Gm5822
Zdhhc23			Rnls
Usf3			Dntt
Retnla			Fbxl15
Gm9581			Rpl13a-ps1
Sod1			Gm17150
Urb1			Slc18a2
D430001F17Rik			Gpr34
Dyrk1a			Gm14519
Ets2			Gm14516
Lnpep			Gm9436
Pdpk1			Gm9083
Zfp598			Gm6023
Msrb1			Gm6274
Cramp1l			Gm4987
Wdr90			Gm7722
Gm8186			Gm5388
Kifc5b			Gm14633
Bak1			Gm5389
Itpr3			Gm5637
Ppard			Gm8172
Brpf3			Rpl3-ps2
Pim1			Gm6881
Tbc1d22b			Gab3
Kifc1			Gm8822
Col11a2			5430427O19Rik
Pbx2			Gm6977
Ehmt2			Gm9009
Bag6			Gm20489
Prrc2a			Tpt1-ps6
Xpo5			Cysltr1
Srf			Gm6335
Cul7			Gm7823
Usp49			Gm8019
Foxp4			Tsc22d3
Nfya			Gm15131
Rpl36			Gm8534
Rfx2			Gm8648
Slc25a23			Gm8662
Man2a1			Kdm5d
Wash1			Eif2s3y
Lbh			Uty
Birc6			Ddx3y
Strn
Heatr5b
Plekhh2
Prkce
Epas1
Foxn2
Npc1
Gm7701
Sap130
Kdm3b
0610009O20Rik
Ythdc2
Dmxl1
Ppic
Alpk2
Spire1
Cep192
Epg5
Zfp236
Cpt1a
Lrp5
Ssh3
Adrbk1
Sptbn2
Npas4
Klc2
Pcnx3
Capn1
Cdc42bpg
Ccdc88b
Atl3
Hnrnpul2
Ganab
Scgb1a1
Stxbp3-ps
Tkfc
Ddb1
Prpf19
Patl1
Zfp91
Gm9938
Dock8
Asah2
Btaf1
Gm340
Arhgap19
Scd1
Npm3
Pdcd11
Sh3pxd2a
Cacul1
Grk5
Clcn5
Was
Rbm3os
Usp9x
Gm5380
Gm2223
Nkrf
Zbtb33
Cul4b
Stag2
Bcorl1
Elf4
Cxx1a
Mmgt1
Atp11c
Gm14698
Zfp275
Slc6a8
Hcfc1
Flna
Emd
Plxna3
Pola1
Foxo4
Med12
Taf1
Xist
Abcb7
Uprt
Armcx2
Gprasp2
Tbc1d8b
Huwe1
Kdm5c
Ubqln2
Rps6ka3
Map3k15

## Sheet: PC1 pos path
GO.ID	Term	Annotated	Significant	Expected	classicFisher	weight0Fisher	FE	GOI
GO:0045944	regulation of transcription RNA polymerase II promoter	1014	67	30.06	7.7e-10	1.7e-09	2.22888	Maml1, Atf5, E2f8, Rps6ka3, Acvr1b, Agrn, Bmpr2, Brca1, Ccnk, Cebpa, Arid3a, Eng, Epas1, Fadd, Foxm1, Fosl2, Fzd5, Cyr61, Il4, Il6, Kpna6, Lrp5, Maz, Mybl1, Ncoa2, Nfatc2ip, Nfya, Nr4a3, Notch1, Pbx2, Prkdc, Sp1, Srebf2, Srf, Supt6, Gabpb2, Tcf20, Agap2, Tnks, Npas4, Plagl1, Zfpm1, Helz2, Thrap3, Ago1, Ets2, Ago2, Nod2, Taf1, Smo, Med13, Ep300, Kmt2d, Zmiz2, Foxo4, Plagl2, Elf4, Med12, Ddx17, Chd…
GO:0046777	protein autophosphorylation	224	24	6.64	6.2e-08	2.9e-09	3.61446	Bcr, Ace, Acvr1b, Atm, Dyrk1a, Eng, Grk5, Uhmk1, Mknk2, Pim1, Stk11, Rassf2, Thy1, Trim28, Stk24, Pak2, Lmtk2, Smg1, Aak1, Taf1, Mink1, Mtor, Cdk12, Cad
GO:0030036	actin cytoskeleton organization	536	44	15.89	1.3e-09	9.4e-07	2.76904	Phactr4, Bcr, Atxn3, Aqp1, Cap1, Cdk5r1, Celsr1, Fhl3, Myh9, Myo1b, Nf1, Prkce, Flna, Mical3, Sptan1, Sptb, Srf, Arfgef1, Plekhh2, Agap2, Ppp1r9b, Cdc42bpb, Vasp, Stk24, Was, Pak2, Arhgef10, Alms1, Wasf2, Ssh3, Ehd2, Msrb1, Flnb, Cobll1, Ep300, Mink1, Ccl24, Diaph3, Mtor, Fmnl1, Spire1, Wash1, Clasp2, Myh10
GO:0015031	protein transport	1611	90	47.76	4.3e-09	4.6e-05	1.88442	Ptpn23, Tmbim6, Adora2a, Axin2, Bard1, Brca1, Cd36, Cdk5r1, Col1a1, Cpt1a, Ddx19a, Emd, Fzd5, Fzd7, Htt, Il13, Il5, Il6, Kpnb1, Jup, Uhmk1, Kpna4, Kpna6, Lrp5, Tram2, Myh9, Nf1, Notch1, Notch2, Prkce, Ppard, Ptch1, Flna, Rab5b, Rab5c, Ranbp2, Rpl28, Slc16a1, Srebf2, Stxbp1, Arfgef1, Gls2, Nlgn2, Synrg, Dnajc27, Trim28, Tnks, Tfrc, Tnfsf4, U2af2, Zmat3, Ywhag, Ahctf1, Nup188, Tlk1, Tnfrsf14, Lmtk2…
GO:0007049	cell cycle	1438	113	42.63	9e-22	9.8e-05	2.65072	Phactr4, Kifc1, Trrap, Ccp110, Numa1, Tex15, Scrib, Espl1, Atf5, Chd4, E2f8, Ehmt2, Bcr, Rps6ka3, Acvr1b, Anxa11, Atm, Axin2, Bak1, Brca1, Birc6, Ccnk, Cdk5r1, Cebpa, Ddb1, Dync1h1, E2f3, Edn3, Foxm1, Grk5, Hcfc1, Htt, Kpnb1, Uhmk1, Lrp5, Mki67, Mnt, Myh9, Nr4a3, Notch2, Mybbp1a, Pim1, Prkce, Sept5, Pole, Ppp1cb, Prkdc, Ptch1, Flna, Rad21, Utp14b, Stag2, Kntc1, Stk11, Gen1, Ttc28, Zfyve26, Chtf8,…
GO:0060561	apoptotic process involved in morphogenenesis	29	6	0.86	0.00018	0.00018	6.97674	Scrib, Bak1, Fzd5, Cyr61, Lrp5, Notch1

## Sheet: PC1 neg path
GO.ID	Term	Annotated	Significant	Expected	classicFisher	weight0Fisher	FE	GOI
GO:0071347	cellular response to interleukin-1	61	11	0.92	1.7e-09	2.9e-08	11.9565	Cebpb, Egr1, Hyal1, Il17a, Il1r1, Saa3, Ccl1, Ccl2, Ccl4, Ccl5, Ccl6
GO:0006954	inflammatory response	570	43	8.6	3.4e-18	5.7e-08	5	Adrb2, Iltifb, Alox5ap, Apoe, Cd14, Cd59a, Cebpb, Chil3, Ecm1, Fcer1g, Fcgr2b, Fcgr3, Hp, Hyal1, Il17a, Il1r1, Anxa1, Lta, Ltb4r1, Lxn, Ly86, Il17rc, Slc11a1, S100a8, Saa3, Ccl1, Ccl2, Ccl4, Ccl5, Ccl6, Cxcl2, Il23r, Tbxa2r, Mgll, Pde5a, Il17f, Pla2g7, Il22, Il17re, Cysltr1, Cxcr6, Cd96, Tnfrsf25
GO:0034341	response to interferon-gamma	83	13	1.25	3.4e-10	2.3e-07	10.4	Socs1, H2-Aa, H2-Ab1, Slc11a1, Ccl1, Ccl2, Ccl4, Ccl5, Ccl6, Il23r, Tgtp1, Cxcl16, Ifitm2
GO:0070374	positive regulation of ERK1 and ERK2 cascade	166	12	2.5	8.7e-06	8.7e-06	4.8	C5ar1, Gcnt2, Cd74, Jun, Ccl1, Ccl2, Ccl4, Ccl5, Ccl6, Spry2, Gpr183, Trem2
GO:0009314	response to radiation	360	13	5.43	0.00343	1.5e-05	2.39411	Apbb1, Bcl2, Plk3, Egr1, Gh, Hyal1, Il1r1, Jun, Junb, Bbc3, Ptprk, Sgk1, Tulp1
GO:0070098	chemokine-mediated signaling pathway	55	7	0.83	1.8e-05	1.8e-05	8.43373	Ccl1, Ccl2, Ccl4, Ccl5, Ccl6, Cxcl2, Trem2

## Sheet: PC2 pos path
GO.ID	Term	Annotated	Significant	Expected	classicFisher	weight0Fisher	FE	GOI
GO:0030593	neutrophil chemotaxis	81	6	0.54	1.7e-05	2.2e-05	11.1111	Dapk2, Ifng, Itgam, S100a8, Ccl3, Ccl4
GO:0007017	microtubule-based process	589	8	3.92	0.04388	0.00091	2.04082	Dnah11, Spice1, Tuba1c, Tubb3, Dync1li2, Spast, Tubb2b, Gpsm2
GO:0045087	innate immune response	566	16	3.77	1.3e-06	0.00208	4.24403	Il1rl2, Nod1, Gbp2, Klrb1c, Havcr2, Mif, Gbp4, S100a8, Ccl3, Ccl4, Serpinb9, Gbp3, Trim13, Tbkbp1, Slamf7
GO:0030217	T cell differentiation	230	8	1.53	0.00016	0.00948	5.22876	Il1rl2, Eomes, Flt3, Dtx1, Ifng, Tbx21, Nrarp
GO:0010942	positive regulation of cell death	592	9	3.94	0.01789	0.0106	2.28426	Nod1, Fam72a, Ifng, Mt3, S100a8, Ccl3, Xdh, Moap1, Trim13
GO:0008152	metabolic process	10196	81	67.9	0.02067	0.03767	1.19293	Smpdl3b, Chchd10, Nod1, Haao, Fam72a, Apobec2, Art2b, Dapk2, Dnase1l3, Eomes, Igf2bp3, Flt3, Gcg, Gzmb, Gzmk, Hbb-bs, Hspa8, Ifng, Il12rb2, Rpsa, Sgk3, Havcr2, Mif, Mmp24, Gbp4, Mt3, Ncf1, Ngp, Enpp1, Rasa3, Rpa2, Rpl19, Rps29, S100a8, Ccl3, Ccl4, Siah1b, Kdm5d, Serpinb6b, Serpinb9, Pak6, Tmprss13, Dntt, Uty, Xdh, Enpp4, Rad9b, Pxylp1, Serpina3f, Cers6, Raver2, Ddx3y, Eif2s3y, Gcfc2, Dgkh, Spast,…

## Sheet: PC2 neg path
GO.ID	Term	Annotated	Significant	Expected	classicFisher	weight0Fisher	FE	GOI
GO:0006954	inflammatory response	570	51	7.08	6.9e-29	3.5e-15	7.20339	Ace, Adam8, C3, Calca, Cd44, Cfh, Chil1, Chil3, Ccr1, Ccr4, Fn1, Gata3, Hc, Ier3, Il13, Il17a, Il4, Il5, Itgav, Ltb4r1, Il1rl1, Naip2, Pparg, Stab1, Rbpj, Rora, Ccl1, Ccl6, Ccl8, Ccl9, Cxcl15, Cxcl2, Cxcl5, Foxp3, Serpina3n, Sdc1, Thbs1, Tnfrsf11a, Tnfsf11, Scgb1a1, Nt5e, Mmp25, Axl, Cxcl3, Aim2, Il17rb, Calcrl, Ccl24, Il17re, Cysltr1, Chia1
GO:0070098	chemokine-mediated signaling pathway	55	11	0.68	6.6e-11	6.6e-11	16.1765	Ccr1, Padi2, Ccl1, Ccl6, Ccl8, Ccl9, Cxcl15, Cxcl2, Cxcl5, Cxcl3, Ccl24
GO:0001525	angiogenesis	424	30	5.26	1.7e-14	1.6e-09	5.70342	Ace, Adam15, Adam8, Ahr, C3, Cav1, Runx1, Chil1, Col18a1, Col4a1, Ctsh, Elk3, Emp2, Fn1, Hc, Itgav, Itgb3, Kdr, Stab1, Ptprb, Rbpj, Rora, Sparc, Tgfbr1, Thbs1, Ramp1, Calcrl, Ccl24, Cysltr1, Cysltr2
GO:0070374	positive regulation of ERK1 and ERK2 cas...	166	15	2.06	2.7e-09	2.7e-09	7.28155	Npnt, C3, Cd44, Chil1, Ccr1, Itgb3, Kdr, Ccl1, Ccl6, Ccl8, Ccl9, Tnfrsf11a, Tnfsf11, Ccl24, Cysltr2
GO:0071347	cellular response to interleukin-1	61	8	0.76	8.5e-07	8.5e-07	10.5263	Fn1, Il17a, Rora, Ccl1, Ccl6, Ccl8, Ccl9, Ccl24
GO:0050728	negative regulation of inflammatory resp...	110	9	1.37	9.6e-06	0.0002		Cd44, Gata3, Ier3, Il4, Pparg, Rora, Foxp3, Nt5e, Calcrl

## Sheet: PC4 pos path
GO.ID	Term	Annotated	Significant	Expected	classicFisher	weight0Fisher	FE	GOI
GO:0045944	positive regulation of transcription from RNA polymerase II promoter	1014	16	5.49	0.00012	0.00012	2.91439	Raf1, Arnt2, Bmp7, Cebpa, Gcg, Il10, Il4, Lif, Maf, Myo6, Nck2, Grhl1, Tgfb3, Vdr, Tox2, Zfp292
GO:0008285	negative regulation of cell proliferation	609	13	3.3	2.7e-05	0.00442	3.93939	Raf1, Bmp7, Cdk6, Cebpa, Il10, Il4, Lif, Mmp9, Tgfb3, Timp2, Vdr, March7, Vsir
GO:0006955	immune response	1138	19	6.16	1.2e-05	0.00457	3.08442	Cxcr5, Camk4, Cd83, Ccr2, Dpp4, Il10, Il4, Lif, Ltf, P2rx7, Padi4, Sh2d1a, Tgfb3, Tnfrsf26, Il21, Tespa1, Vsir, Prg4
GO:0043065	positive regulation of apoptotic process	549	10	2.97	0.00082	0.04077	3.367	Bmp7, Gadd45a, Il10, Mcl1, Mmp9, Nck2, Slc11a2, P2rx7, Tgfb3, Vdr
GO:0000122	negative regulation of transcription fro...	731	9	3.96	0.01802	0.04089	Bach2, Cebpa, Maf, Nck2, Tcf7, Vdr, Zfp281, Samd11, Eid1
GO:0043410	positive regulation of MAPK cascade	434	7	2.35	0.00946	0.04386	2.97872	Raf1, Gadd45a, Gcg, Lif, P2rx7, Tgfb3, Timp2

## Sheet: PC4 neg path
GO.ID	Term	Annotated	Significant	Expected	classicFisher	weight0Fisher	FE	GOI
GO:0006260	DNA replication	289	19	4.32	8.5e-08	7.2e-05	4.39815	Rfc4, Chaf1b, Ccne1, Pdgfb, Rad51, Rbbp4, Rfc2, Rrm2, Ssrp1, Rbbp7, Orc6, Gmnn, Tipin, Pold3, Rpa3, Rfc3, Lrwd1, Dscc1, Rfc5
GO:0072593	reactive oxygen species metabolic process	230	9	3.44	0.00802	0.0004	2.61628	Atpif1, Cybb, Ncf1, Nos1, Pdgfb, Ndufs1, Klrk1, Prdx4, Lrrk2
GO:0044770	cell cycle phase transition	313	13	4.68	0.00093	0.00126	2.77778	Tcf19, Bcat1, Ccne1, Cdc25a, E2f1, Gsg2, Ppp3ca, Psme3, Ube2l3, Lcmt1, Tipin, Anapc11, Rps27l
GO:0071560	cellular response to TGFb stimulus	165	9	2.47	0.00088	0.00455	3.64372	Cav2, Cdh5, Col3a1, Hyal2, Xcl1, Ptprk, Strap, Chst11, Wwox
GO:0006338	chromatin remodeling	110	8	1.64	0.00025	0.00435	Hdac2, Hells, Padi2, Ptma, Rbbp4, Tada2a, Rbbp7, Cenpv
GO:0042102	positive regulation of T cell proliferat...	89	6	1.33	0.00219	0.03808	Il2ra, Xcl1, Havcr2, Icosl, Pdcd1lg2, Tnfrsf13c
