# Supplementary material for: c-Maf controls immune responses by regulating disease-specific gene networks and repressing IL-2 in CD4+ T cells
Source: Springer Nature journal article supplement (doi:10.1038/s41590-018-0083-5), 2018-04-13
Supplement: MOESM5 [file 41590_2018_83_MOESM5_ESM-Supp_T_3.xlsx]

## Sheet: MAL_UP_1284_d7
Gene Symbol	FC	Log FC	FC (abs)	Regulation KO vs WT
Gm6104	-1.66263	-0.733465	1.66263	up
Gm15452	-1.78267	-0.83404	1.78267	up
Mybl1	-2.17454	-1.12071	2.17454	up
Gm6195	-1.99631	-0.997336	1.99631	up
Prex2	-1.56827	-0.649175	1.56827	up
Stau2	-2.23893	-1.16281	2.23893	up
Mcm3	-2.04335	-1.03094	2.04335	up
Ogfrl1	-1.92609	-0.945678	1.92609	up
Gm7846	-1.78887	-0.839049	1.78887	up
Gm10307	-1.68435	-0.752193	1.68435	up
Prim2	-1.77292	-0.826131	1.77292	up
Cnnm4	-1.53905	-0.622037	1.53905	up
Cox5b	-1.54841	-0.630788	1.54841	up
Mgat4a	-1.51963	-0.60372	1.51963	up
2010300C02Rik	-2.03371	-1.02411	2.03371	up
Tsga10	-1.77012	-0.823851	1.77012	up
Il1rl1	-2.63089	-1.39555	2.63089	up
Il18r1	-1.59811	-0.676368	1.59811	up
Tex30	-1.54312	-0.625854	1.54312	up
Nabp1	-1.57149	-0.652135	1.57149	up
Sgol2	-1.67116	-0.74085	1.67116	up
Tmem237	-1.92538	-0.945146	1.92538	up
Cyp20a1	-1.73624	-0.795964	1.73624	up
Raph1	-1.55253	-0.634622	1.55253	up
2810408I11Rik	-1.97474	-0.981663	1.97474	up
Acadl	-1.70201	-0.767243	1.70201	up
Bard1	-2.0259	-1.01856	2.0259	up
Tmbim1	-1.67321	-0.74262	1.67321	up
Rqcd1	-1.59147	-0.670361	1.59147	up
Tuba4a	-1.51424	-0.598595	1.51424	up
Fam124b	-2.28682	-1.19334	2.28682	up
Psmd1	-1.74879	-0.806358	1.74879	up
Ptma	-1.82146	-0.865098	1.82146	up
Sh3bp4	-1.84858	-0.886421	1.84858	up
Asb1	-1.58574	-0.665158	1.58574	up
Gpc1	-3.71822	-1.89461	3.71822	up
Pask	-2.09653	-1.06801	2.09653	up
Hdlbp	-1.5683	-0.649205	1.5683	up
Tmem163	-1.66074	-0.731826	1.66074	up
Zranb3	-1.8328	-0.874053	1.8328	up
Mcm6	-1.57433	-0.654741	1.57433	up
Gm15790	-1.61241	-0.689217	1.61241	up
Fam72a	-2.10321	-1.07259	2.10321	up
Nucks1	-1.661	-0.73205	1.661	up
Pik3c2b	-2.31178	-1.209	2.31178	up
Ube2t	-1.81358	-0.858842	1.81358	up
Gm4204	-1.60324	-0.680987	1.60324	up
Timm17a	-1.56026	-0.64179	1.56026	up
Csrp1	-1.56425	-0.645476	1.56425	up
Phlda3	-1.96204	-0.972354	1.96204	up
Cacna1s	-2.45994	-1.29862	2.45994	up
Kif14	-2.21347	-1.14631	2.21347	up
Dennd1b	-1.5232	-0.607104	1.5232	up
Aspm	-1.55149	-0.633652	1.55149	up
Uchl5	-1.50185	-0.586742	1.50185	up
Gm15583	-1.81004	-0.856022	1.81004	up
Fam129a	-1.65903	-0.730338	1.65903	up
1700025G04Rik	-1.72666	-0.787982	1.72666	up
Lamc1	-2.31571	-1.21145	2.31571	up
Rgs16	-3.9868	-1.99523	3.9868	up
Gm15428	-2.34235	-1.22795	2.34235	up
Mrps14	-1.50751	-0.592171	1.50751	up
Fasl	-2.24935	-1.16951	2.24935	up
BC055324	-1.59154	-0.670422	1.59154	up
Gm16550	-1.55772	-0.639432	1.55772	up
Pogk	-1.7941	-0.843259	1.7941	up
Uck2	-1.84501	-0.88363	1.84501	up
Tmco1	-1.54055	-0.62345	1.54055	up
Nuf2	-2.05782	-1.04112	2.05782	up
Uap1	-1.86112	-0.896173	1.86112	up
Slamf7	-1.65062	-0.723007	1.65062	up
Cd48	-2.11975	-1.08389	2.11975	up
Igsf8	-1.88	-0.910733	1.88	up
Tagln2	-2.04465	-1.03186	2.04465	up
Mnda	-2.9094	-1.54072	2.9094	up
Fh1	-1.51548	-0.599774	1.51548	up
Chml	-1.80746	-0.853961	1.80746	up
Exo1	-2.19619	-1.135	2.19619	up
Adss	-1.5623	-0.643674	1.5623	up
Desi2	-1.51825	-0.602405	1.51825	up
Lbr	-1.55369	-0.6357	1.55369	up
Degs1	-1.59339	-0.672097	1.59339	up
Cenpf	-1.65661	-0.728235	1.65661	up
Smyd2	-1.56173	-0.643149	1.56173	up
Nsl1	-1.70506	-0.769825	1.70506	up
Dtl	-1.93212	-0.950187	1.93212	up
Ints7	-1.50039	-0.58534	1.50039	up
Lpgat1	-1.99251	-0.99459	1.99251	up
Nek2	-2.53804	-1.34372	2.53804	up
Lamb3	-3.60227	-1.84891	3.60227	up
Suv39h2	-1.97757	-0.98373	1.97757	up
Sephs1	-1.9416	-0.957244	1.9416	up
Mcm10	-2.37641	-1.24879	2.37641	up
Optn	-2.24046	-1.1638	2.24046	up
Nudt5	-1.70223	-0.767422	1.70223	up
Gm13199	-1.6855	-0.753173	1.6855	up
Itih5	-1.71161	-0.775357	1.71161	up
Il2ra	-3.18991	-1.67352	3.18991	up
Fam188a	-1.59336	-0.67207	1.59336	up
Trdmt1	-1.63148	-0.706182	1.63148	up
Vim	-2.60966	-1.38386	2.60966	up
Arhgap21	-1.5904	-0.669392	1.5904	up
Pdss1	-1.81018	-0.856131	1.81018	up
Mastl	-2.0821	-1.05804	2.0821	up
Zmynd19	-1.73681	-0.79644	1.73681	up
Nrarp	-2.42732	-1.27937	2.42732	up
Tubb4b	-2.2385	-1.16254	2.2385	up
2010317E24Rik	-1.85617	-0.892332	1.85617	up
Lcn4	-2.39939	-1.26267	2.39939	up
Surf4	-1.61304	-0.689782	1.61304	up
Gtf3c5	-1.6086	-0.685804	1.6086	up
Gm13394	-1.50348	-0.588309	1.50348	up
Slc27a4	-1.70842	-0.772666	1.70842	up
Cercam	-3.88201	-1.9568	3.88201	up
Odf2	-1.65426	-0.726185	1.65426	up
Ccbl1	-1.52896	-0.612554	1.52896	up
Qrfp	-2.21616	-1.14806	2.21616	up
St6galnac6	-1.94665	-0.960996	1.94665	up
Fam129b	-3.82303	-1.93472	3.82303	up
Pbx3	-2.05957	-1.04234	2.05957	up
Hspa5	-1.58503	-0.664514	1.58503	up
Dab2ip	-1.64047	-0.714106	1.64047	up
Nek6	-2.73814	-1.4532	2.73814	up
Wdr38	-1.84298	-0.882044	1.84298	up
Gm13461	-1.84216	-0.881395	1.84216	up
Gm13493	-1.51236	-0.596805	1.51236	up
Spc25	-2.05267	-1.0375	2.05267	up
Gorasp2	-1.51862	-0.602765	1.51862	up
Hat1	-1.73205	-0.792483	1.73205	up
Cdca7	-1.57449	-0.654884	1.57449	up
Lnp	-1.68225	-0.750392	1.68225	up
Gm13669	-1.71551	-0.778639	1.71551	up
Ttc30a1	-1.5191	-0.603219	1.5191	up
Sestd1	-2.119	-1.08338	2.119	up
Itga4	-1.75187	-0.808896	1.75187	up
Nup35	-1.87861	-0.909667	1.87861	up
Gm4735	-1.63155	-0.706244	1.63155	up
2700094K13Rik	-1.58386	-0.663443	1.58386	up
Slc43a3	-2.63376	-1.39713	2.63376	up
Ssrp1	-1.96275	-0.972874	1.96275	up
Tnks1bp1	-1.71783	-0.780588	1.71783	up
Nup160	-1.61547	-0.691958	1.61547	up
Gm13772	-1.67914	-0.747721	1.67914	up
Ckap5	-1.60613	-0.683586	1.60613	up
Trp53i11	-2.47955	-1.31008	2.47955	up
Apip	-1.57704	-0.657215	1.57704	up
Kif18a	-1.76352	-0.81846	1.76352	up
Ccdc34	-2.21365	-1.14642	2.21365	up
Aven	-1.51801	-0.602181	1.51801	up
Arhgap11a	-1.72654	-0.787884	1.72654	up
Bub1b	-1.95295	-0.965657	1.95295	up
D2Ertd750e	-1.67984	-0.74832	1.67984	up
Casc5	-1.86531	-0.899415	1.86531	up
Rad51	-2.28086	-1.18958	2.28086	up
Oip5	-1.89449	-0.921807	1.89449	up
Nusap1	-1.95145	-0.964548	1.95145	up
Tyro3	-1.50826	-0.592881	1.50826	up
Ehd4	-1.51958	-0.603668	1.51958	up
Pdia3	-1.91691	-0.938779	1.91691	up
Slc30a4	-1.58169	-0.661467	1.58169	up
Slc24a5	-1.59138	-0.670277	1.59138	up
Dut	-2.13844	-1.09656	2.13844	up
Atp8b4	-2.32745	-1.21875	2.32745	up
Gm10774	-1.55537	-0.637255	1.55537	up
Ncaph	-1.99653	-0.997496	1.99653	up
Dusp2	-2.0062	-1.00446	2.0062	up
Bub1	-2.08686	-1.06134	2.08686	up
Gm14005	-1.80598	-0.852784	1.80598	up
Ttl	-1.72969	-0.790513	1.72969	up
Ckap2l	-2.06343	-1.04504	2.06343	up
Stk35	-1.52254	-0.60648	1.52254	up
Cdc25b	-1.61558	-0.692056	1.61558	up
Pcna	-1.80645	-0.853156	1.80645	up
Mcm8	-2.38409	-1.25344	2.38409	up
Rrbp1	-1.54844	-0.630819	1.54844	up
Gm14130	-2.10946	-1.07687	2.10946	up
Cst7	-1.73319	-0.793426	1.73319	up
Gins1	-2.22537	-1.15404	2.22537	up
Gm14150	-1.96254	-0.972721	1.96254	up
Fam110a	-1.51993	-0.604006	1.51993	up
Zcchc3	-2.3086	-1.20702	2.3086	up
Tpx2	-2.02293	-1.01645	2.02293	up
E2f1	-1.75394	-0.810597	1.75394	up
Sla2	-1.5799	-0.65983	1.5799	up
Gm14276	-1.60466	-0.682271	1.60466	up
Dsn1	-1.72474	-0.786376	1.72474	up
Rpn2	-1.75637	-0.812601	1.75637	up
Fam83d	-1.78817	-0.838488	1.78817	up
Mybl2	-2.60345	-1.38043	2.60345	up
Pkig	-1.59222	-0.671043	1.59222	up
Ada	-1.57382	-0.654274	1.57382	up
Pigt	-1.55092	-0.633128	1.55092	up
Ube2c	-2.02209	-1.01585	2.02209	up
Sulf2	-4.42535	-2.14579	4.42535	up
Prex1	-1.57032	-0.651058	1.57032	up
Cse1l	-1.79505	-0.844028	1.79505	up
B4galt5	-1.81473	-0.859759	1.81473	up
Gm14270	-1.50944	-0.594018	1.50944	up
Aurka	-2.1161	-1.08141	2.1161	up
Slmo2	-1.63575	-0.709954	1.63575	up
Slco4a1	-2.29438	-1.19811	2.29438	up
Zbtb46	-2.27099	-1.18332	2.27099	up
Polr3k	-1.78526	-0.836132	1.78526	up
Mrps28	-1.59037	-0.669361	1.59037	up
Fabp5	-2.4323	-1.28232	2.4323	up
Gm5844	-1.62898	-0.703973	1.62898	up
Gm10259	-2.11826	-1.08288	2.11826	up
Ect2	-1.66171	-0.732665	1.66171	up
Tnfsf10	-1.86077	-0.895901	1.86077	up
Gpr160	-3.93651	-1.97692	3.93651	up
Gm9791	-1.5515	-0.633663	1.5515	up
Ccna2	-2.24771	-1.16845	2.24771	up
Plk4	-1.9295	-0.948227	1.9295	up
Dclk1	-5.61837	-2.49015	5.61837	up
Mbnl1	-1.54228	-0.62506	1.54228	up
Slc33a1	-1.59263	-0.671413	1.59263	up
AC116732.1	-1.5242	-0.608054	1.5242	up
Gmps	-1.52999	-0.613522	1.52999	up
Mlf1	-2.20264	-1.13924	2.20264	up
4930579G24Rik	-1.98675	-0.990414	1.98675	up
Dclk2	-1.59212	-0.670946	1.59212	up
Iqgap3	-1.77635	-0.828912	1.77635	up
Pmf1	-1.62194	-0.697717	1.62194	up
Ssr2	-1.64042	-0.714063	1.64042	up
Krtcap2	-1.66246	-0.733315	1.66246	up
Cks1b	-2.13088	-1.09145	2.13088	up
Ilf2	-1.52507	-0.608878	1.52507	up
S100a10	-1.52776	-0.611415	1.52776	up
Prune	-1.55245	-0.634551	1.55245	up
Anp32e	-1.5296	-0.613157	1.5296	up
Phgdh	-1.80904	-0.855221	1.80904	up
Gm12428	-1.72546	-0.786983	1.72546	up
Ttf2	-1.6048	-0.68239	1.6048	up
Atp1a1	-1.58079	-0.660643	1.58079	up
Tspan2	-1.93961	-0.955766	1.93961	up
Sike1	-1.56787	-0.648801	1.56787	up
Dclre1b	-1.5671	-0.6481	1.5671	up
Fam19a3	-1.94055	-0.956466	1.94055	up
Ppm1j	-1.68945	-0.756551	1.68945	up
Ddx20	-1.60538	-0.682914	1.60538	up
Gm12500	-1.53188	-0.615304	1.53188	up
Gpsm2	-1.86575	-0.899756	1.86575	up
Slc25a24	-1.54857	-0.630938	1.54857	up
Rtcd1	-1.51999	-0.604058	1.51999	up
Sass6	-1.76273	-0.817809	1.76273	up
Pde5a	-2.7655	-1.46754	2.7655	up
Sec24d	-2.19778	-1.13605	2.19778	up
AC113287.1	-1.84711	-0.885272	1.84711	up
Larp7	-1.6106	-0.687599	1.6106	up
4930422G04Rik	-1.71656	-0.779521	1.71656	up
Gar1	-1.51204	-0.596496	1.51204	up
Ostc	-1.52811	-0.611753	1.52811	up
Hadh	-1.73929	-0.798501	1.73929	up
Npnt	-2.59807	-1.37744	2.59807	up
Gstcd	-1.76167	-0.816941	1.76167	up
Cenpe	-1.88828	-0.917071	1.88828	up
Ppp3ca	-1.89351	-0.921065	1.89351	up
H2afz	-1.88761	-0.916564	1.88761	up
Ccbl2	-1.89619	-0.923106	1.89619	up
Odf2l	-1.57706	-0.657241	1.57706	up
Cryz	-2.30177	-1.20274	2.30177	up
Lrrc40	-1.76901	-0.822941	1.76901	up
Depdc1a	-2.18396	-1.12695	2.18396	up
Penk	-4.75608	-2.24977	4.75608	up
Chd7	-1.53597	-0.619147	1.53597	up
Ccne2	-2.07194	-1.05098	2.07194	up
Rad54b	-1.84318	-0.882194	1.84318	up
Fsbp	-1.77632	-0.828888	1.77632	up
Gem	-1.94019	-0.956197	1.94019	up
Atp6v0d2	-3.22831	-1.69078	3.22831	up
Ggh	-2.18026	-1.1245	2.18026	up
Coq3	-1.57467	-0.655054	1.57467	up
Mms22l	-1.75149	-0.808585	1.75149	up
Gm11914	-1.63365	-0.7081	1.63365	up
Sigmar1	-1.52787	-0.61152	1.52787	up
Reck	-1.62226	-0.698009	1.62226	up
Glipr2	-1.77179	-0.825211	1.77179	up
Gm12504	-1.74648	-0.804448	1.74648	up
Melk	-2.09529	-1.06715	2.09529	up
Anp32b	-1.528	-0.611646	1.528	up
Nans	-1.70184	-0.767092	1.70184	up
Coro2a	-2.38608	-1.25464	2.38608	up
Tbc1d2	-4.86287	-2.28181	4.86287	up
Smc2	-1.95077	-0.964043	1.95077	up
Ptpn3	-1.64282	-0.716172	1.64282	up
Txn1	-1.81386	-0.859064	1.81386	up
Bspry	-2.4288	-1.28024	2.4288	up
Alad	-1.5456	-0.628171	1.5456	up
Pole3	-1.56551	-0.646634	1.56551	up
Gm11223	-1.77239	-0.825699	1.77239	up
Megf9	-1.96599	-0.975258	1.96599	up
Haus6	-1.65325	-0.725301	1.65325	up
5830433M19Rik	-1.52846	-0.612082	1.52846	up
Usp1	-1.64535	-0.718394	1.64535	up
Alg6	-1.77812	-0.830355	1.77812	up
Raver2	-1.5704	-0.651135	1.5704	up
Tmem48	-2.19531	-1.13443	2.19531	up
Orc1	-2.35076	-1.23313	2.35076	up
Gm12743	-2.19705	-1.13557	2.19705	up
9130206I24Rik	-2.02452	-1.01758	2.02452	up
Stil	-1.98701	-0.9906	1.98701	up
Rad54l	-2.21178	-1.14521	2.21178	up
Ipp	-1.5454	-0.627977	1.5454	up
Nasp	-1.72903	-0.78996	1.72903	up
Toe1	-1.51491	-0.599236	1.51491	up
Mutyh	-1.94523	-0.959941	1.94523	up
Eif2b3	-1.53296	-0.616318	1.53296	up
Kif2c	-1.98901	-0.99205	1.98901	up
Cdc20	-2.06382	-1.04532	2.06382	up
Ebna1bp2	-1.50623	-0.590942	1.50623	up
Gm12856	-2.1812	-1.12512	2.1812	up
Ppih	-1.83117	-0.872768	1.83117	up
Ctps	-1.85954	-0.894943	1.85954	up
Mfsd2a	-2.16365	-1.11346	2.16365	up
Mycbp	-1.66559	-0.736035	1.66559	up
Cdca8	-1.92315	-0.94347	1.92315	up
Clspn	-2.07793	-1.05514	2.07793	up
Yars	-1.56686	-0.647877	1.56686	up
C77080	-1.78032	-0.83214	1.78032	up
Srsf4	-1.50092	-0.585843	1.50092	up
Rcc1	-1.88178	-0.9121	1.88178	up
Atpif1	-1.61324	-0.68996	1.61324	up
Gm12999	-1.75011	-0.807449	1.75011	up
Smpdl3b	-3.16041	-1.66011	3.16041	up
Rpa2	-2.27189	-1.18389	2.27189	up
Fgr	-2.66187	-1.41244	2.66187	up
Nudc	-1.58034	-0.660236	1.58034	up
Gpn2	-1.59963	-0.677739	1.59963	up
Aim1l	-1.66977	-0.739647	1.66977	up
Ccdc21	-1.54701	-0.629483	1.54701	up
Stmn1	-1.76867	-0.822666	1.76867	up
Aunip	-2.27424	-1.18538	2.27424	up
Sepn1	-1.52191	-0.605883	1.52191	up
Man1c1	-1.97785	-0.983936	1.97785	up
Runx3	-1.6871	-0.754542	1.6871	up
Clic4	-1.85161	-0.888779	1.85161	up
E2f2	-1.93674	-0.953632	1.93674	up
Ddost	-1.8502	-0.887682	1.8502	up
Mrto4	-1.57186	-0.65247	1.57186	up
Padi2	-2.21715	-1.14871	2.21715	up
Efhd2	-1.70397	-0.768896	1.70397	up
Gm13232	-2.11288	-1.07921	2.11288	up
AL627077.2	-1.50361	-0.588433	1.50361	up
Gm13237	-2.10438	-1.0734	2.10438	up
Gm13140	-1.54896	-0.631295	1.54896	up
Gm13135	-1.54453	-0.627168	1.54453	up
Srm	-1.76391	-0.818776	1.76391	up
Apitd1	-2.2635	-1.17855	2.2635	up
Slc25a33	-2.15178	-1.10553	2.15178	up
Eno1	-1.61585	-0.69229	1.61585	up
Gm13092	-1.51366	-0.598041	1.51366	up
Kcnab2	-1.69471	-0.761041	1.69471	up
A430005L14Rik	-1.62228	-0.69802	1.62228	up
Mrpl20	-1.50734	-0.592003	1.50734	up
Gtpbp10	-1.56822	-0.649125	1.56822	up
Adam22	-2.15168	-1.10546	2.15168	up
Gm10108	-1.71342	-0.776878	1.71342	up
Fgl2	-1.70811	-0.772401	1.70811	up
Fam185a	-1.90194	-0.92747	1.90194	up
Xrcc2	-1.78459	-0.835592	1.78459	up
Paxip1	-1.58328	-0.662913	1.58328	up
Tyms	-1.70843	-0.772673	1.70843	up
Ept1	-2.06433	-1.04568	2.06433	up
Cenpa	-1.77854	-0.830692	1.77854	up
Cad	-1.7474	-0.805207	1.7474	up
Ppm1g	-1.51544	-0.599738	1.51544	up
Ywhah	-1.71763	-0.780423	1.71763	up
Slbp	-1.80863	-0.854899	1.80863	up
Tacc3	-2.07724	-1.05467	2.07724	up
Whsc1	-1.50925	-0.593828	1.50925	up
Ablim2	-1.90114	-0.926865	1.90114	up
Crmp1	-1.97663	-0.983044	1.97663	up
Lyar	-1.87054	-0.903456	1.87054	up
Lap3	-1.74342	-0.801922	1.74342	up
Ncapg	-1.86285	-0.897514	1.86285	up
Pi4k2b	-1.6457	-0.718697	1.6457	up
Rell1	-1.75167	-0.808732	1.75167	up
Nfxl1	-1.80737	-0.853891	1.80737	up
Usp46	-1.7119	-0.775601	1.7119	up
Ppat	-1.70433	-0.769202	1.70433	up
Paics	-1.62252	-0.698236	1.62252	up
Hopx	-2.23693	-1.16152	2.23693	up
Gm15830	-2.09955	-1.07008	2.09955	up
Uso1	-1.50549	-0.590231	1.50549	up
2011-09-01	-2.02815	-1.02017	2.02815	up
Mrpl1	-1.50934	-0.59392	1.50934	up
Plac8	-2.42567	-1.27839	2.42567	up
Hpse	-2.07537	-1.05337	2.07537	up
Lrrc8b	-1.6018	-0.679697	1.6018	up
Lrrc8c	-1.7212	-0.783412	1.7212	up
Cdc7	-1.56326	-0.644554	1.56326	up
Pole	-1.76716	-0.821431	1.76716	up
2900026A02Rik	-2.60846	-1.3832	2.60846	up
Wscd2	-1.65785	-0.729311	1.65785	up
Ung	-1.66563	-0.736072	1.66563	up
Srsf9	-1.50359	-0.588414	1.50359	up
Cox6a1	-1.52265	-0.606585	1.52265	up
Cit	-1.6295	-0.704431	1.6295	up
Pebp1	-1.57887	-0.658894	1.57887	up
Rfc5	-2.01223	-1.0088	2.01223	up
Nos1	-4.07903	-2.02823	4.07903	up
Atp2a2	-1.58365	-0.663251	1.58365	up
Camkk2	-1.50183	-0.586721	1.50183	up
Anapc5	-1.59591	-0.674382	1.59591	up
Kntc1	-2.03935	-1.02811	2.03935	up
Hip1r	-1.89089	-0.919062	1.89089	up
Cdk2ap1	-1.62095	-0.69684	1.62095	up
Setd8	-1.66822	-0.738312	1.66822	up
Snrnp35	-1.70194	-0.767178	1.70194	up
Tmed2	-1.63665	-0.710746	1.63665	up
Ran	-1.77356	-0.826645	1.77356	up
Tpst1	-2.20975	-1.14388	2.20975	up
Gm15920	-1.51346	-0.597855	1.51346	up
Ncf1	-5.21945	-2.3839	5.21945	up
Rfc2	-1.65261	-0.724744	1.65261	up
Tbl2	-1.60837	-0.6856	1.60837	up
Hip1	-2.26854	-1.18177	2.26854	up
Mcm7	-2.03215	-1.023	2.03215	up
Got2-ps1	-1.52977	-0.613312	1.52977	up
Heatr2	-2.05702	-1.04055	2.05702	up
Sun1	-2.0859	-1.06067	2.0859	up
Adap1	-2.63069	-1.39544	2.63069	up
Mad1l1	-1.57487	-0.655236	1.57487	up
Nudt1	-1.57776	-0.657882	1.57776	up
Eif3b	-1.5348	-0.618049	1.5348	up
Chst12	-2.74279	-1.45564	2.74279	up
Lfng	-1.66479	-0.735338	1.66479	up
Kdelr2	-1.89583	-0.922826	1.89583	up
Aimp2	-1.69752	-0.763431	1.69752	up
Ccz1	-1.50118	-0.586098	1.50118	up
Pdap1	-1.58182	-0.661589	1.58182	up
Gtf3a	-1.55553	-0.637406	1.55553	up
Gm8615	-1.59426	-0.672891	1.59426	up
B3galtl	-1.81218	-0.857724	1.81218	up
Brca2	-2.0427	-1.03048	2.0427	up
Rfc3	-1.85533	-0.891678	1.85533	up
Pon3	-1.60607	-0.683536	1.60607	up
Asns	-3.14505	-1.65308	3.14505	up
Rpa3	-1.91114	-0.934434	1.91114	up
Fam3c	-1.55167	-0.633819	1.55167	up
Snd1	-1.50219	-0.587063	1.50219	up
Tmem209	-1.51721	-0.60142	1.51721	up
Nup205	-1.57079	-0.651487	1.57079	up
AC124762.1	-1.60826	-0.685501	1.60826	up
Ezh2	-1.60939	-0.686516	1.60939	up
Pdia4	-2.23356	-1.15935	2.23356	up
Gimap7	-1.55616	-0.637986	1.55616	up
Mpp6	-1.74872	-0.806298	1.74872	up
Osbpl3	-2.11489	-1.08058	2.11489	up
Cycs	-1.58082	-0.660669	1.58082	up
Cbx3	-1.56993	-0.650703	1.56993	up
Chn2	-2.40737	-1.26746	2.40737	up
Ggct	-1.53349	-0.616816	1.53349	up
Gars	-1.89601	-0.92297	1.89601	up
Lsm5	-1.73963	-0.79878	1.73963	up
Lancl2	-1.65599	-0.727693	1.65599	up
Mad2l1	-1.95273	-0.965494	1.95273	up
Gm8566	-1.5328	-0.616171	1.5328	up
Eif2ak3	-1.68184	-0.750038	1.68184	up
Usp39	-1.53039	-0.613901	1.53039	up
Capg	-1.64318	-0.716487	1.64318	up
Gm9008	-1.63322	-0.70772	1.63322	up
Hk2	-2.37893	-1.25031	2.37893	up
Mthfd2	-1.538	-0.621055	1.538	up
Anxa4	-1.65174	-0.723986	1.65174	up
Rpn1	-1.97726	-0.983506	1.97726	up
Sec61a1	-1.6152	-0.691711	1.6152	up
Mcm2	-1.78352	-0.834726	1.78352	up
Nup210	-1.52081	-0.604841	1.52081	up
Lsm3	-1.61992	-0.695922	1.61992	up
0610040F04Rik	-1.83733	-0.877611	1.83733	up
Gm17055	-1.56365	-0.644915	1.56365	up
Bhlhe40	-1.949	-0.962731	1.949	up
Rad18	-1.62354	-0.699143	1.62354	up
Fancd2	-2.12471	-1.08727	2.12471	up
Zfand4	-2.10882	-1.07644	2.10882	up
Klrg1	-2.51015	-1.32777	2.51015	up
Tpi1	-1.52471	-0.608536	1.52471	up
Cdca3	-2.09761	-1.06875	2.09761	up
Lpar5	-1.82026	-0.864144	1.82026	up
Ncapd2	-1.66665	-0.736948	1.66665	up
Rad51ap1	-2.08999	-1.06349	2.08999	up
D6Wsu163e	-1.61184	-0.688713	1.61184	up
Foxm1	-1.91154	-0.934735	1.91154	up
BC064078	-1.62507	-0.700505	1.62507	up
Gabarapl1	-1.55017	-0.632422	1.55017	up
Klrd1	-2.57654	-1.36544	2.57654	up
Klrk1	-7.37464	-2.88257	7.37464	up
Klrc2	-13.7777	-3.78426	13.7777	up
Klrc1	-10.5077	-3.39338	10.5077	up
Magohb	-2.33307	-1.22223	2.33307	up
Csda	-1.91867	-0.940103	1.91867	up
Bcat1	-2.89899	-1.53555	2.89899	up
Bhlhe41	-1.94822	-0.962158	1.94822	up
Myadm	-3.02592	-1.59737	3.02592	up
Tmem238	-1.85804	-0.893785	1.85804	up
Ube2s	-1.56326	-0.644562	1.56326	up
Lig1	-1.94105	-0.956838	1.94105	up
Ehd2	-2.14164	-1.09871	2.14164	up
Ptgir	-1.72683	-0.78813	1.72683	up
Pglyrp1	-2.05116	-1.03644	2.05116	up
D930028M14Rik	-1.87065	-0.903537	1.87065	up
Axl	-1.67203	-0.741604	1.67203	up
Snrpa	-1.70862	-0.772834	1.70862	up
Timm50	-1.66462	-0.73519	1.66462	up
Lgals7	-2.01016	-1.00731	2.01016	up
Yif1b	-1.66941	-0.73934	1.66941	up
Wdr62	-1.82132	-0.864984	1.82132	up
Arhgap33	-1.63251	-0.70709	1.63251	up
Hspb6	-1.5018	-0.586695	1.5018	up
Zbtb32	-2.92291	-1.5474	2.92291	up
Haus5	-1.54944	-0.631749	1.54944	up
Lsr	-2.45149	-1.29366	2.45149	up
AC149055.1	-2.20623	-1.14158	2.20623	up
C230052I12Rik	-1.74742	-0.805227	1.74742	up
Ccdc123	-1.59361	-0.672295	1.59361	up
Ccne1	-2.76687	-1.46826	2.76687	up
Pop4	-1.67756	-0.746367	1.67756	up
Gm5593	-2.24382	-1.16595	2.24382	up
Nkg7	-2.42309	-1.27685	2.42309	up
Etfb	-1.95069	-0.963984	1.95069	up
Vsig10l	-1.54064	-0.623527	1.54064	up
Pold1	-1.71031	-0.774255	1.71031	up
Napsa	-3.48222	-1.80001	3.48222	up
Zfp473	-1.62603	-0.701356	1.62603	up
Nup62	-1.79661	-0.845279	1.79661	up
Fcgrt	-2.25674	-1.17424	2.25674	up
Dkkl1	-4.75506	-2.24946	4.75506	up
Sult2b1	-1.58341	-0.663037	1.58341	up
Lmtk3	-3.3497	-1.74403	3.3497	up
Tmem143	-1.53743	-0.620521	1.53743	up
Emp3	-2.06601	-1.04684	2.06601	up
Saal1	-1.67231	-0.741839	1.67231	up
E2f8	-2.27066	-1.18311	2.27066	up
Fancf	-1.77463	-0.827514	1.77463	up
Gas2	-1.98893	-0.991993	1.98893	up
Trpm1	-1.5791	-0.659099	1.5791	up
Tarsl2	-1.54272	-0.625476	1.54272	up
Snrpa1	-1.55471	-0.636648	1.55471	up
Vimp	-1.95027	-0.963676	1.95027	up
Chsy1	-3.01386	-1.59161	3.01386	up
Lrrk1	-4.9757	-2.3149	4.9757	up
Fanci	-1.79494	-0.843938	1.79494	up
Ticrr	-1.84475	-0.883424	1.84475	up
Prc1	-1.89032	-0.918629	1.89032	up
Blm	-2.04065	-1.02903	2.04065	up
Pde8a	-1.78436	-0.835404	1.78436	up
Ctsc	-1.63622	-0.710364	1.63622	up
4632434I11Rik	-1.87883	-0.909831	1.87883	up
Alg8	-1.87249	-0.904957	1.87249	up
Spcs2	-1.689	-0.756168	1.689	up
Pold3	-1.56133	-0.642774	1.56133	up
3200002M19Rik	-1.66244	-0.733303	1.66244	up
Tomt	-1.66636	-0.736704	1.66636	up
Rrm1	-1.95916	-0.970235	1.95916	up
Apbb1	-2.24361	-1.16582	2.24361	up
Akip1	-1.62412	-0.699654	1.62412	up
Dennd5a	-1.59066	-0.669628	1.59066	up
Tmem41b	-1.67327	-0.74267	1.67327	up
Wee1	-1.57152	-0.652158	1.57152	up
Swap70	-1.71179	-0.775507	1.71179	up
Mical2	-2.26298	-1.17822	2.26298	up
Rras2	-1.81477	-0.859788	1.81477	up
Arl6ip1	-1.71728	-0.780128	1.71728	up
Coq7	-1.68483	-0.752606	1.68483	up
Ccp110	-1.79807	-0.846448	1.79807	up
Cdr2	-1.62227	-0.698016	1.62227	up
Plk1	-2.34133	-1.22733	2.34133	up
Lcmt1	-1.51474	-0.599073	1.51474	up
Jmjd5	-1.59956	-0.677674	1.59956	up
Sbk1	-1.5451	-0.627699	1.5451	up
Hirip3	-1.76287	-0.817929	1.76287	up
Kif22	-1.94552	-0.960159	1.94552	up
Sephs2	-1.7908	-0.840605	1.7908	up
Pycard	-1.80505	-0.852041	1.80505	up
Itgam	-1.61661	-0.692971	1.61661	up
Itgax	-6.52653	-2.70632	6.52653	up
Gm5903	-1.64666	-0.719546	1.64666	up
Tacc2	-2.47311	-1.30633	2.47311	up
Bub3	-1.57303	-0.653551	1.57303	up
Mki67	-1.70706	-0.771517	1.70706	up
Stk32c	-5.81905	-2.54078	5.81905	up
Pwwp2b	-1.85037	-0.887815	1.85037	up
Tubgcp2	-1.6652	-0.735695	1.6652	up
Paox	-2.16881	-1.11691	2.16881	up
Ifitm2	-2.08937	-1.06307	2.08937	up
Ifitm3	-3.25376	-1.70211	3.25376	up
Lrdd	-1.95189	-0.964871	1.95189	up
Tspan4	-1.62767	-0.702804	1.62767	up
Ifitm10	-2.883	-1.52757	2.883	up
Ctsd	-1.93541	-0.952637	1.93541	up
Lsp1	-1.52472	-0.60854	1.52472	up
Cars	-1.5568	-0.63858	1.5568	up
Shcbp1	-2.05745	-1.04085	2.05745	up
Tfdp1	-1.72317	-0.785064	1.72317	up
Mcph1	-1.50556	-0.5903	1.50556	up
Xkr5	-2.50636	-1.32559	2.50636	up
Ckap2	-2.06419	-1.04558	2.06419	up
Vdac3	-1.60221	-0.68006	1.60221	up
Gins4	-1.62157	-0.697391	1.62157	up
Ppapdc1b	-1.7798	-0.831711	1.7798	up
Tex15	-1.60275	-0.680546	1.60275	up
Ubxn8	-1.57475	-0.655127	1.57475	up
Gsr	-1.87781	-0.90905	1.87781	up
Dusp4	-2.91239	-1.5422	2.91239	up
Eri1	-1.65971	-0.730929	1.65971	up
Zdhhc2	-2.41577	-1.27248	2.41577	up
Mlf1ip	-1.65569	-0.727435	1.65569	up
Casp3	-1.89748	-0.924088	1.89748	up
Dctd	-1.85237	-0.889372	1.85237	up
Spcs3	-1.50789	-0.592529	1.50789	up
Hmgb2	-2.0391	-1.02793	2.0391	up
2700029M09Rik	-1.58355	-0.663162	1.58355	up
Ifi30	-1.64893	-0.721526	1.64893	up
Haus8	-1.82212	-0.865618	1.82212	up
Ankle1	-1.52589	-0.609654	1.52589	up
Glt25d1	-1.73765	-0.797135	1.73765	up
Tpm4	-1.5493	-0.631616	1.5493	up
F2rl3	-3.66092	-1.87221	3.66092	up
Mcm5	-2.15697	-1.10901	2.15697	up
Rbmxl1	-1.54849	-0.630861	1.54849	up
Ddx39	-1.56477	-0.645949	1.56477	up
Asf1b	-2.12791	-1.08944	2.12791	up
Calr	-1.89585	-0.922847	1.89585	up
Syce2	-1.66558	-0.736024	1.66558	up
Orc6	-2.06323	-1.0449	2.06323	up
Neto2	-2.57954	-1.36712	2.57954	up
Mt3	-5.29671	-2.4051	5.29671	up
Mt2	-2.4335	-1.28303	2.4335	up
Mt1	-4.17873	-2.06306	4.17873	up
Nup93	-1.69736	-0.763294	1.69736	up
Gins3	-1.80867	-0.854931	1.80867	up
Gm5913	-1.65651	-0.728146	1.65651	up
Gm15210	-1.52062	-0.604664	1.52062	up
Hsf4	-1.91613	-0.938196	1.91613	up
Slc9a5	-2.24249	-1.1651	2.24249	up
Enkd1	-1.68138	-0.749643	1.68138	up
Nutf2	-1.56238	-0.643746	1.56238	up
Aars	-1.53299	-0.616348	1.53299	up
Rfwd3	-1.66498	-0.735508	1.66498	up
Mlkl	-2.79115	-1.48086	2.79115	up
2310061C15Rik	-1.89883	-0.925108	1.89883	up
Cenpn	-2.22978	-1.1569	2.22978	up
Mphosph6	-1.54331	-0.626024	1.54331	up
Gins2	-1.75391	-0.810572	1.75391	up
Klhdc4	-1.50791	-0.592547	1.50791	up
Slc7a5	-2.21964	-1.15033	2.21964	up
Cyba	-1.58726	-0.666542	1.58726	up
Snai3	-2.48755	-1.31473	2.48755	up
Cdt1	-1.73428	-0.794338	1.73428	up
Fanca	-1.82342	-0.866645	1.82342	up
Afg3l1	-1.6238	-0.699371	1.6238	up
Nup133	-1.81533	-0.860228	1.81533	up
Dnmt1	-1.6776	-0.746395	1.6776	up
Pde4a	-2.2598	-1.17619	2.2598	up
Tmed1	-1.66707	-0.737313	1.66707	up
Spc24	-1.96589	-0.975186	1.96589	up
Zfp599	-2.12492	-1.08741	2.12492	up
Anln	-1.85431	-0.890886	1.85431	up
Dpy19l1	-2.22323	-1.15266	2.22323	up
St14	-3.64937	-1.86765	3.64937	up
St3gal4	-1.64142	-0.714943	1.64142	up
Tirap	-1.55893	-0.640561	1.55893	up
Chek1	-1.60381	-0.681506	1.60381	up
Stt3a	-1.67884	-0.747463	1.67884	up
Nrgn	-4.84862	-2.27757	4.84862	up
Thy1	-1.75723	-0.813304	1.75723	up
Rnf26	-1.62697	-0.70219	1.62697	up
C2cd2l	-1.53864	-0.621652	1.53864	up
Dpagt1	-2.07784	-1.05508	2.07784	up
H2afx	-1.67334	-0.742731	1.67334	up
Hmbs	-1.67282	-0.742281	1.67282	up
Hyou1	-2.04401	-1.03141	2.04401	up
Phldb1	-1.61858	-0.694733	1.61858	up
Sdhd	-1.5365	-0.619646	1.5365	up
Rdx	-1.57378	-0.654232	1.57378	up
Exph5	-1.9847	-0.988924	1.9847	up
Idh3a	-2.02636	-1.01889	2.02636	up
Acsbg1	-2.47536	-1.30764	2.47536	up
Etfa	-1.50075	-0.585683	1.50075	up
1700017B05Rik	-1.74528	-0.803456	1.74528	up
Cox5a	-1.65577	-0.7275	1.65577	up
Kif23	-1.92933	-0.948099	1.92933	up
Zwilch	-1.89541	-0.922512	1.89541	up
Uchl4	-1.86944	-0.902608	1.86944	up
Tipin	-2.27054	-1.18304	2.27054	up
Dennd4a	-1.57167	-0.652295	1.57167	up
Pif1	-1.64927	-0.721832	1.64927	up
2810417H13Rik	-2.28213	-1.19038	2.28213	up
Dapk2	-3.87672	-1.95484	3.87672	up
Rps27l	-1.76793	-0.822057	1.76793	up
Rora	-1.56886	-0.649713	1.56886	up
Anxa2	-2.21912	-1.14998	2.21912	up
Ccnb2	-2.19127	-1.13177	2.19127	up
Myo5a	-1.86358	-0.898074	1.86358	up
Leo1	-1.51079	-0.595302	1.51079	up
Lysmd2	-2.00875	-1.0063	2.00875	up
Mb21d1	-1.60154	-0.679464	1.60154	up
Ttk	-1.9184	-0.939901	1.9184	up
Fam46a	-3.05863	-1.61289	3.05863	up
Rwdd2a	-1.61883	-0.694948	1.61883	up
Gm5620	-1.97809	-0.984107	1.97809	up
Chst2	-1.83271	-0.873982	1.83271	up
Acpl2	-1.73943	-0.798616	1.73943	up
Mrps22	-1.56163	-0.643054	1.56163	up
Ryk	-2.27129	-1.18351	2.27129	up
Topbp1	-1.67679	-0.745699	1.67679	up
Poc1a	-1.94816	-0.962114	1.94816	up
Manf	-2.25429	-1.17267	2.25429	up
Traip	-2.2025	-1.13914	2.2025	up
Impdh2	-1.60372	-0.681422	1.60372	up
Prkar2a	-1.69935	-0.76498	1.69935	up
Ccdc51	-1.59812	-0.67638	1.59812	up
Nme6	-1.9126	-0.935537	1.9126	up
Cdc25a	-1.76528	-0.819898	1.76528	up
Elp6	-1.53275	-0.616125	1.53275	up
Nradd	-1.50623	-0.590939	1.50623	up
Cmtm7	-2.17295	-1.11965	2.17295	up
Eomes	-3.31009	-1.72687	3.31009	up
Ccr8	-1.83427	-0.875206	1.83427	up
Abhd5	-1.53358	-0.616903	1.53358	up
Kif15	-1.95836	-0.969649	1.95836	up
Mthfd1l	-1.61106	-0.688014	1.61106	up
Fbxo5	-1.90102	-0.92677	1.90102	up
Ulbp1	-1.85857	-0.894196	1.85857	up
Lrp11	-1.57635	-0.656592	1.57635	up
Nup43	-1.66261	-0.733446	1.66261	up
Gm9797	-1.50093	-0.585857	1.50093	up
Fam54a	-2.28921	-1.19485	2.28921	up
Samd3	-3.23296	-1.69286	3.23296	up
Gm10145	-1.56875	-0.649612	1.56875	up
Cenpw	-2.33223	-1.22171	2.33223	up
Hdac2	-1.55449	-0.636443	1.55449	up
Tube1	-1.83936	-0.879206	1.83936	up
Rpf2	-1.63483	-0.709139	1.63483	up
Prep	-1.82894	-0.87101	1.82894	up
Lilrb4	-1.5433	-0.626016	1.5433	up
Ccdc138	-1.6817	-0.749919	1.6817	up
Sowahc	-1.99872	-0.999073	1.99872	up
Adamts14	-1.78539	-0.836242	1.78539	up
Prf1	-2.1559	-1.10829	2.1559	up
Ppa1	-1.86109	-0.89615	1.86109	up
Dna2	-2.21121	-1.14483	2.21121	up
Cdk1	-2.27815	-1.18786	2.27815	up
Gm5778	-1.84812	-0.886057	1.84812	up
Ggt1	-3.56335	-1.83324	3.56335	up
Slc5a4b	-1.53941	-0.62238	1.53941	up
Slc19a1	-1.50785	-0.592493	1.50785	up
Sumo3	-1.57209	-0.652688	1.57209	up
Ube2g2	-1.71486	-0.778093	1.71486	up
Icosl	-2.07528	-1.05331	2.07528	up
Ppap2c	-2.28106	-1.18971	2.28106	up
Cdc34	-1.62683	-0.70206	1.62683	up
Gzmm	-2.14086	-1.09819	2.14086	up
Bsg	-1.53192	-0.615339	1.53192	up
Hcn2	-1.57539	-0.655709	1.57539	up
Palm	-2.55515	-1.35341	2.55515	up
Arid3a	-1.63069	-0.705486	1.63069	up
Sf3a2	-1.56296	-0.64428	1.56296	up
Lmnb2	-1.53665	-0.619784	1.53665	up
Thop1	-1.78558	-0.836397	1.78558	up
Fzr1	-1.61611	-0.692528	1.61611	up
AC153939.1	-1.62777	-0.702893	1.62777	up
Txnrd1	-1.60709	-0.684448	1.60709	up
Chst11	-2.91296	-1.54249	2.91296	up
1500009L16Rik	-3.81273	-1.93082	3.81273	up
Hsp90b1	-2.31991	-1.21407	2.31991	up
Parpbp	-1.89067	-0.918895	1.89067	up
Nup37	-1.77312	-0.826288	1.77312	up
Chpt1	-1.65375	-0.725738	1.65375	up
Tmpo	-1.68655	-0.754073	1.68655	up
Nedd1	-1.62701	-0.702219	1.62701	up
Snrpf	-1.54417	-0.626832	1.54417	up
Ndufa12	-1.58269	-0.662383	1.58269	up
Nudt4	-1.64708	-0.719908	1.64708	up
E2f7	-2.05768	-1.04102	2.05768	up
Nap1l1	-1.59887	-0.677055	1.59887	up
Phlda1	-2.54094	-1.34536	2.54094	up
Nup107	-2.06765	-1.04799	2.06765	up
Mdm1	-1.55295	-0.635008	1.55295	up
Tsfm	-1.68154	-0.749781	1.68154	up
Mettl1	-1.5226	-0.606534	1.5226	up
Mars	-1.56385	-0.645105	1.56385	up
Shmt2	-1.54455	-0.627187	1.54455	up
Prim1	-1.76828	-0.82235	1.76828	up
Atp5b	-1.53157	-0.615014	1.53157	up
Timeless	-1.81194	-0.857538	1.81194	up
Esyt1	-1.87815	-0.90931	1.87815	up
Pa2g4	-1.68114	-0.749441	1.68114	up
Smtn	-1.87233	-0.904832	1.87233	up
Mtfp1	-1.85827	-0.893963	1.85827	up
Nefh	-2.02031	-1.01458	2.02031	up
Xbp1	-1.59025	-0.669257	1.59025	up
Pold2	-1.72348	-0.785326	1.72348	up
Myo1g	-1.52002	-0.604091	1.52002	up
Gm11991	-1.61355	-0.690237	1.61355	up
Hus1	-1.58465	-0.664163	1.58465	up
Fignl1	-2.02037	-1.01462	2.02037	up
2810442I21Rik	-2.76297	-1.46622	2.76297	up
Fbxo48	-2.77159	-1.47072	2.77159	up
Plek	-1.99539	-0.996671	1.99539	up
Slc1a4	-1.74276	-0.801371	1.74276	up
Lgalsl	-1.78535	-0.836209	1.78535	up
0610010F05Rik	-1.88686	-0.91599	1.88686	up
Snrnp25	-1.67391	-0.743226	1.67391	up
Ccdc99	-2.10848	-1.07621	2.10848	up
Rars	-1.5963	-0.674735	1.5963	up
Hmmr	-2.00584	-1.0042	2.00584	up
Nudcd2	-1.51654	-0.60078	1.51654	up
Thg1l	-1.6035	-0.681225	1.6035	up
Adam19	-1.9719	-0.979586	1.9719	up
Gm16033	-2.16656	-1.11541	2.16656	up
Fam71b	-1.81013	-0.856092	1.81013	up
AL669948.1	-1.74334	-0.801851	1.74334	up
Havcr2	-2.59579	-1.37617	2.59579	up
3010026O09Rik	-1.51926	-0.603365	1.51926	up
Canx	-1.78579	-0.83656	1.78579	up
Agxt2l2	-1.50009	-0.585051	1.50009	up
Hnrnpab	-1.7377	-0.797175	1.7377	up
Nhp2	-1.61858	-0.694726	1.61858	up
N4bp3	-2.38023	-1.2511	2.38023	up
0610009B22Rik	-1.72894	-0.789884	1.72894	up
Rad50	-1.50314	-0.587977	1.50314	up
Anxa6	-2.02335	-1.01675	2.02335	up
G3bp1	-1.65636	-0.728014	1.65636	up
Mrpl22	-1.52049	-0.604533	1.52049	up
Rasd1	-1.69402	-0.760454	1.69402	up
Shmt1	-1.89049	-0.918756	1.89049	up
Map2k3	-1.52061	-0.604654	1.52061	up
Cenpv	-2.17141	-1.11863	2.17141	up
Pfas	-1.50842	-0.593036	1.50842	up
Ctc1	-1.56349	-0.644773	1.56349	up
Aurkb	-2.18897	-1.13025	2.18897	up
Tmem107	-2.3312	-1.22107	2.3312	up
Eif5a	-1.62018	-0.696154	1.62018	up
Pelp1	-1.53623	-0.619394	1.53623	up
C1qbp	-1.57239	-0.652958	1.57239	up
Fam64a	-1.59063	-0.669599	1.59063	up
Itgae	-2.05628	-1.04003	2.05628	up
Gsg2	-1.59976	-0.677853	1.59976	up
Rap1gap2	-2.24392	-1.16602	2.24392	up
Hic1	-1.92024	-0.94129	1.92024	up
Ywhae	-1.54436	-0.627012	1.54436	up
4932415L08RIK	-1.53457	-0.617834	1.53457	up
Gemin4	-1.5242	-0.608056	1.5242	up
Cpd	-1.79852	-0.84681	1.79852	up
Gm12346	-1.5855	-0.664939	1.5855	up
Gm12734	-1.52899	-0.612575	1.52899	up
Dhrs13	-2.25341	-1.17211	2.25341	up
Spag5	-1.97202	-0.979678	1.97202	up
Tmem97	-2.09092	-1.06414	2.09092	up
Suz12	-1.62328	-0.698913	1.62328	up
Atad5	-1.87621	-0.907824	1.87621	up
Slfn3	-1.61766	-0.693913	1.61766	up
Tada2a	-1.55605	-0.63789	1.55605	up
Znhit3	-1.6522	-0.724391	1.6522	up
Brip1	-1.74481	-0.803072	1.74481	up
4632419I22Rik	-1.60612	-0.683579	1.60612	up
Tubd1	-1.51568	-0.599963	1.51568	up
Prr11	-2.25813	-1.17513	2.25813	up
Ska2	-1.73007	-0.790827	1.73007	up
Gm11491	-1.66348	-0.734204	1.66348	up
Rad51c	-1.72216	-0.78422	1.72216	up
Akap1	-1.6414	-0.714927	1.6414	up
Hlf	-3.12018	-1.64163	3.12018	up
Nme1	-1.93636	-0.95335	1.93636	up
Lrrc59	-2.01607	-1.01155	2.01607	up
Eme1	-2.04459	-1.03181	2.04459	up
Slc35b1	-1.85465	-0.891147	1.85465	up
Cbx1	-1.56075	-0.642239	1.56075	up
Tbx21	-1.94344	-0.958611	1.94344	up
Tbkbp1	-2.78663	-1.47852	2.78663	up
Cisd3	-1.92194	-0.942567	1.92194	up
Grb7	-3.65796	-1.87104	3.65796	up
Cdc6	-2.39607	-1.26067	2.39607	up
Top2a	-1.9288	-0.947705	1.9288	up
Psmc3ip	-1.73816	-0.797559	1.73816	up
Tubg1	-1.87751	-0.90882	1.87751	up
AARSD1	-1.50855	-0.593166	1.50855	up
Aarsd1	-1.54942	-0.631725	1.54942	up
Vat1	-1.73285	-0.793146	1.73285	up
Brca1	-2.11362	-1.07972	2.11362	up
Rdm1	-1.53101	-0.614484	1.53101	up
Arl4d	-2.00895	-1.00644	2.00895	up
Tmem101	-1.50428	-0.58907	1.50428	up
BC030867	-2.14573	-1.10147	2.14573	up
Kif18b	-1.85188	-0.888989	1.85188	up
Hexim2	-1.50649	-0.591193	1.50649	up
Myl4	-2.05362	-1.03817	2.05362	up
Tanc2	-1.79712	-0.845687	1.79712	up
Cyb561	-2.19886	-1.13676	2.19886	up
Ern1	-1.94716	-0.96137	1.94716	up
Tex2	-1.86618	-0.900084	1.86618	up
Kpna2	-2.01791	-1.01286	2.01791	up
Psmd12	-1.50287	-0.587722	1.50287	up
Nup85	-1.81553	-0.86039	1.81553	up
Rhbdf2	-1.60507	-0.682635	1.60507	up
Tk1	-1.9192	-0.940507	1.9192	up
Birc5	-2.15125	-1.10517	2.15125	up
Mrpl12	-1.58661	-0.665948	1.58661	up
Slc25a10	-1.74661	-0.804557	1.74661	up
P4hb	-1.61783	-0.694062	1.61783	up
Arhgdia	-1.52656	-0.610287	1.52656	up
Alyref	-1.69227	-0.758959	1.69227	up
Hmga1-rs1	-1.71301	-0.776537	1.71301	up
Cd7	-2.4763	-1.30819	2.4763	up
Gm6682	-2.07145	-1.05064	2.07145	up
Gen1	-1.72163	-0.783778	1.72163	up
Ddx1	-1.50506	-0.589816	1.50506	up
Pqlc3	-1.61931	-0.695379	1.61931	up
Pdia6	-2.40112	-1.26371	2.40112	up
Rrm2	-2.30695	-1.20599	2.30695	up
1700047I17Rik2	-1.60501	-0.682585	1.60501	up
Mis18bp1	-1.89152	-0.919546	1.89152	up
Lrr1	-2.09203	-1.0649	2.09203	up
Mgat2	-1.50349	-0.588312	1.50349	up
Dnaaf2	-1.62293	-0.698605	1.62293	up
Pole2	-2.11399	-1.07997	2.11399	up
Tmx1	-1.50676	-0.591445	1.50676	up
Mthfd1	-1.91672	-0.938642	1.91672	up
Plekhg3	-1.64358	-0.716844	1.64358	up
Eif2s1	-1.55091	-0.633112	1.55091	up
Rad51l1	-1.79666	-0.845318	1.79666	up
Erh	-1.55886	-0.640488	1.55886	up
Gm5436	-1.51127	-0.59576	1.51127	up
Cep128	-1.55397	-0.635955	1.55397	up
Gpr65	-1.85139	-0.888611	1.85139	up
Tdp1	-1.69479	-0.761108	1.69479	up
Psmc1	-1.5466	-0.629101	1.5466	up
Calm1	-1.53892	-0.621915	1.53892	up
Cpsf2	-1.50189	-0.58678	1.50189	up
4831426I19Rik	-1.67973	-0.748232	1.67973	up
Hsp90aa1	-1.56799	-0.648913	1.56799	up
Cinp	-1.56101	-0.642476	1.56101	up
Inf2	-2.23519	-1.1604	2.23519	up
Siva1	-2.04956	-1.03532	2.04956	up
Akt1	-1.5124	-0.596844	1.5124	up
Crip1	-1.74526	-0.803445	1.74526	up
4930427A07Rik	-2.07649	-1.05415	2.07649	up
Ncapg2	-1.91509	-0.937415	1.91509	up
Rapgef5	-1.80027	-0.84821	1.80027	up
Cdca7l	-1.52449	-0.608331	1.52449	up
Akr1e1	-1.60111	-0.679075	1.60111	up
Adarb2	-1.6979	-0.763749	1.6979	up
Hist1h4i	-1.91869	-0.940119	1.91869	up
Hist1h2bj	-2.37986	-1.25088	2.37986	up
Hist1h1d	-2.26083	-1.17685	2.26083	up
Hist1h2bc	-2.40594	-1.2666	2.40594	up
Hist1h1c	-1.76697	-0.821281	1.76697	up
Lrrc16a	-1.55436	-0.636317	1.55436	up
Gmnn	-2.116	-1.08134	2.116	up
Gpld1	-1.54336	-0.62607	1.54336	up
Dusp22	-2.03721	-1.02659	2.03721	up
Gmds	-1.5962	-0.67464	1.5962	up
Wrnip1	-1.50693	-0.591614	1.50693	up
Serpinb1a	-2.30722	-1.20615	2.30722	up
Serpinb6b	-2.38758	-1.25555	2.38758	up
Serpinb9	-2.95347	-1.56241	2.95347	up
Nqo2	-2.37359	-1.24707	2.37359	up
Nrn1	-2.52167	-1.33438	2.52167	up
Txndc5	-2.19119	-1.13171	2.19119	up
Tbc1d7	-1.69009	-0.757099	1.69009	up
Gfod1	-1.60421	-0.681866	1.60421	up
5033430I15Rik	-1.5455	-0.628074	1.5455	up
Dek	-1.6533	-0.725348	1.6533	up
Cenpp	-1.838	-0.878134	1.838	up
Cks2	-1.75549	-0.811876	1.75549	up
Sfxn1	-1.66831	-0.738385	1.66831	up
Thoc3	-1.56795	-0.648878	1.56795	up
Arl10	-1.81466	-0.859702	1.81466	up
Mxd3	-2.10046	-1.07071	2.10046	up
Lman2	-1.65134	-0.723635	1.65134	up
Golm1	-1.91488	-0.937253	1.91488	up
4930486L24Rik	-3.21384	-1.6843	3.21384	up
Ctla2b	-3.86964	-1.9522	3.86964	up
Ctla2a	-3.01854	-1.59385	3.01854	up
Ptch1	-1.85444	-0.89098	1.85444	up
Zfp367	-1.78599	-0.836725	1.78599	up
Zfp458	-1.54431	-0.626961	1.54431	up
Trip13	-2.27685	-1.18704	2.27685	up
Brd9	-1.50651	-0.591209	1.50651	up
Cep72	-1.64978	-0.722276	1.64978	up
Ankrd32	-1.59894	-0.677115	1.59894	up
Dhfr	-1.96475	-0.974349	1.96475	up
Fam151b	-1.51516	-0.599472	1.51516	up
Arsb	-2.71183	-1.43927	2.71183	up
Sv2c	-1.86166	-0.896589	1.86166	up
Gm6169	-2.02092	-1.01502	2.02092	up
Hexb	-1.59648	-0.674891	1.59648	up
Serf1	-1.97592	-0.982522	1.97592	up
Cenph	-2.12185	-1.08532	2.12185	up
Ccnb1	-2.24699	-1.16799	2.24699	up
Cenpk	-2.19292	-1.13286	2.19292	up
Ipo11	-1.61307	-0.689808	1.61307	up
Apoo-ps	-1.65585	-0.727568	1.65585	up
Ndufaf2	-1.55061	-0.632834	1.55061	up
Depdc1b	-2.11031	-1.07745	2.11031	up
Ankrd55	-2.04037	-1.02883	2.04037	up
Gzma	-11.6217	-3.53875	11.6217	up
Gzmk	-3.37987	-1.75697	3.37987	up
Itga1	-1.79783	-0.846256	1.79783	up
Pelo	-1.81962	-0.863634	1.81962	up
Nid2	-3.2397	-1.69586	3.2397	up
Kcnk5	-1.5282	-0.611834	1.5282	up
Dnajc9	-1.60621	-0.683664	1.60621	up
Vcl	-2.45796	-1.29746	2.45796	up
Ap3m1	-1.53588	-0.619064	1.53588	up
Zmiz1	-1.66066	-0.731753	1.66066	up
Anxa11	-1.50496	-0.589726	1.50496	up
Tkt	-1.54188	-0.624689	1.54188	up
Nt5dc2	-1.69251	-0.75916	1.69251	up
5730469M10Rik	-2.40194	-1.2642	2.40194	up
Cdkn3	-2.12124	-1.08491	2.12124	up
Wdhd1	-1.7836	-0.834794	1.7836	up
Lgals3	-2.39233	-1.25842	2.39233	up
Dlgap5	-2.17741	-1.12261	2.17741	up
Gzmc	-2.13271	-1.09269	2.13271	up
Pspc1	-1.55995	-0.641504	1.55995	up
Ska3	-2.12385	-1.08668	2.12385	up
Phf11	-2.28426	-1.19173	2.28426	up
Gm4902	-1.79102	-0.840779	1.79102	up
Kpna3	-1.54736	-0.62981	1.54736	up
Rnaseh2b	-2.02751	-1.01971	2.02751	up
Esco2	-1.89072	-0.918935	1.89072	up
Gm20667	-1.94771	-0.961779	1.94771	up
Cdca2	-1.83245	-0.873771	1.83245	up
Dock5	-1.65282	-0.72493	1.65282	up
Reep4	-1.9586	-0.969823	1.9586	up
Dnajc15	-2.44333	-1.28885	2.44333	up
Dgkh	-1.57215	-0.652741	1.57215	up
Mtrf1	-1.51505	-0.599369	1.51505	up
Gm5465	-1.67942	-0.747961	1.67942	up
Diap3	-1.88203	-0.91229	1.88203	up
Bora	-1.68097	-0.749292	1.68097	up
Uchl3	-1.69104	-0.757915	1.69104	up
Ipo5	-1.86274	-0.897428	1.86274	up
Clybl	-1.56624	-0.647308	1.56624	up
Nup155	-1.55322	-0.635261	1.55322	up
Skp2	-2.0836	-1.05908	2.0836	up
Rai14	-3.05038	-1.60899	3.05038	up
Tars	-1.50453	-0.589317	1.50453	up
Pop1	-1.50176	-0.586651	1.50176	up
Spag1	-1.83584	-0.876441	1.83584	up
Ncald	-6.89503	-2.78556	6.89503	up
Nudcd1	-1.58567	-0.665091	1.58567	up
Rad21	-1.6496	-0.722116	1.6496	up
Med30	-1.84886	-0.886638	1.84886	up
Dscc1	-2.25435	-1.17271	2.25435	up
Mtbp	-1.54252	-0.625292	1.54252	up
Atad2	-1.67492	-0.744095	1.67492	up
Gm2991	-1.59906	-0.677226	1.59906	up
Tg	-3.66676	-1.87451	3.66676	up
Wisp1	-4.75183	-2.24848	4.75183	up
4930572J05Rik	-1.66766	-0.737825	1.66766	up
Ly6c2	-4.29461	-2.10253	4.29461	up
Pycrl	-1.56522	-0.646364	1.56522	up
Gpaa1	-1.55333	-0.635365	1.55333	up
Tonsl	-1.57457	-0.654961	1.57457	up
Recql4	-1.908	-0.932064	1.908	up
Apol10b	-2.34121	-1.22725	2.34121	up
Ncf4	-1.88163	-0.911984	1.88163	up
Il2rb	-1.84607	-0.884457	1.84607	up
C1qtnf6	-2.24255	-1.16514	2.24255	up
Pdxp	-1.6304	-0.705229	1.6304	up
Lgals1	-2.75123	-1.46008	2.75123	up
Nol12	-1.56132	-0.642769	1.56132	up
Pdgfb	-2.82112	-1.49627	2.82112	up
Pmm1	-1.5975	-0.67582	1.5975	up
Tnfrsf13c	-3.10796	-1.63597	3.10796	up
Cenpm	-1.78457	-0.835574	1.78457	up
Gtse1	-2.21404	-1.14668	2.21404	up
Zbed4	-1.78188	-0.833398	1.78188	up
Creld2	-2.78472	-1.47753	2.78472	up
Lmf2	-1.57351	-0.65399	1.57351	up
Lrrk2	-2.04615	-1.03291	2.04615	up
Tuba1b	-1.95216	-0.965069	1.95216	up
Tuba1a	-1.78157	-0.833153	1.78157	up
Tuba1c	-2.14824	-1.10315	2.14824	up
Troap	-2.06604	-1.04687	2.06604	up
Racgap1	-1.90063	-0.926474	1.90063	up
Tenc1	-2.89048	-1.53131	2.89048	up
Soat2	-1.71214	-0.775798	1.71214	up
Itgb7	-1.53675	-0.619886	1.53675	up
Espl1	-2.10591	-1.07445	2.10591	up
Aaas	-1.69062	-0.757548	1.69062	up
Cbx5	-1.65262	-0.724753	1.65262	up
Rogdi	-1.56233	-0.643695	1.56233	up
Carhsp1	-1.57986	-0.659794	1.57986	up
Nubp1	-1.51251	-0.596948	1.51251	up
Litaf	-1.68238	-0.750502	1.68238	up
Mcm4	-1.81997	-0.863917	1.81997	up
2610318N02Rik	-2.07317	-1.05184	2.07317	up
Sdf2l1	-3.01496	-1.59214	3.01496	up
Gm15648	-1.50898	-0.593574	1.50898	up
Ranbp1	-1.7392	-0.798426	1.7392	up
Gnb1l	-1.60278	-0.680575	1.60278	up
Cdc45	-2.13609	-1.09497	2.13609	up
Mrpl40	-1.68839	-0.75565	1.68839	up
Alg3	-1.61369	-0.690364	1.61369	up
Dnajb11	-2.07694	-1.05446	2.07694	up
Rfc4	-2.08906	-1.06286	2.08906	up
Umps	-1.79734	-0.845864	1.79734	up
Ccdc14	-1.64421	-0.717397	1.64421	up
Polq	-1.76664	-0.82101	1.76664	up
Tmem39a	-1.74849	-0.806109	1.74849	up
Cd200r4	-1.97835	-0.984299	1.97835	up
C330027C09Rik	-2.27258	-1.18433	2.27258	up
Alcam	-1.61037	-0.687388	1.61037	up
Dcbld2	-1.56155	-0.642983	1.56155	up
St3gal6	-1.81516	-0.860097	1.81516	up
Cpox	-1.89521	-0.922357	1.89521	up
Mina	-1.66531	-0.735792	1.66531	up
Crybg3	-1.53937	-0.622337	1.53937	up
Gm9581	-1.62378	-0.699354	1.62378	up
Hspa13	-1.53722	-0.620325	1.53722	up
D16Ertd472e	-1.53405	-0.617346	1.53405	up
Mis18a	-1.55187	-0.63401	1.55187	up
Gart	-1.64518	-0.718245	1.64518	up
Chaf1b	-2.05316	-1.03784	2.05316	up
Tfb1m	-1.57474	-0.655117	1.57474	up
Tulp4	-1.94293	-0.958237	1.94293	up
Gm2792	-3.2705	-1.70951	3.2705	up
Sytl3	-2.78477	-1.47756	2.78477	up
Mrpl18	-1.59111	-0.670034	1.59111	up
Pkmyt1	-1.56181	-0.643223	1.56181	up
Paqr4	-1.97125	-0.979114	1.97125	up
1600002H07Rik	-1.77524	-0.828011	1.77524	up
Ccnf	-1.92219	-0.942751	1.92219	up
Pgp	-1.5169	-0.601123	1.5169	up
Hn1l	-1.60245	-0.680279	1.60245	up
Baiap3	-2.0413	-1.02949	2.0413	up
Chtf18	-2.21867	-1.14969	2.21867	up
AC159277.1	-1.52101	-0.605033	1.52101	up
Wdr90	-1.65627	-0.72794	1.65627	up
Mrpl28	-1.53925	-0.622224	1.53925	up
Kifc5b	-1.82893	-0.871003	1.82893	up
Hmga1	-1.63384	-0.708269	1.63384	up
Fkbp5	-1.76108	-0.81646	1.76108	up
Mtch1	-1.60423	-0.681878	1.60423	up
Rsph1	-1.60548	-0.683003	1.60548	up
U2af1	-1.53289	-0.616257	1.53289	up
Myo1f	-1.98997	-0.992745	1.98997	up
Kank3	-1.61195	-0.688804	1.61195	up
Kifc1	-1.99935	-0.999532	1.99935	up
Gm8696	-1.82636	-0.868973	1.82636	up
Lsm2	-1.72164	-0.783783	1.72164	up
D17H6S56E-5	-1.82612	-0.868784	1.82612	up
Vars	-1.52174	-0.605718	1.52174	up
Tcf19	-1.89975	-0.925812	1.89975	up
Cchcr1	-1.69432	-0.760703	1.69432	up
Tubb5	-1.65582	-0.727542	1.65582	up
Nrm	-1.70881	-0.772992	1.70881	up
Znrd1as	-1.66414	-0.734777	1.66414	up
Polh	-1.79527	-0.844201	1.79527	up
Ccnd3	-1.83875	-0.878724	1.83875	up
Bysl	-1.58564	-0.665065	1.58564	up
Tomm6	-1.64872	-0.721349	1.64872	up
Prickle4	-1.65375	-0.725738	1.65375	up
Gm14872	-1.67483	-0.744011	1.67483	up
Apobec2	-1.82615	-0.868808	1.82615	up
Sgol1	-1.85082	-0.888168	1.85082	up
Ebi3	-1.57359	-0.654063	1.57359	up
Chaf1a	-2.14446	-1.10061	2.14446	up
Uhrf1	-2.04684	-1.0334	2.04684	up
Tnfsf9	-1.66699	-0.737243	1.66699	up
Ndc80	-1.95894	-0.97007	1.95894	up
Dpy30	-1.78318	-0.834453	1.78318	up
2410091C18Rik	-1.57521	-0.655545	1.57521	up
Gemin6	-1.92449	-0.944474	1.92449	up
Epas1	-2.31804	-1.21291	2.31804	up
Rhoq	-2.20713	-1.14217	2.20713	up
Pigf	-2.05303	-1.03775	2.05303	up
Ttc7	-1.69445	-0.76082	1.69445	up
Gm15978	-1.89924	-0.925424	1.89924	up
Mettl4	-1.62423	-0.699755	1.62423	up
Map3k8	-1.5698	-0.65058	1.5698	up
Usp14	-1.66067	-0.731765	1.66067	up
Snrpd1	-1.63667	-0.710759	1.63667	up
Rbbp8	-1.7138	-0.777201	1.7138	up
Ankrd29	-2.33355	-1.22253	2.33355	up
Osbpl1a	-1.64955	-0.722069	1.64955	up
Gm7701	-1.53902	-0.622007	1.53902	up
Reep5	-1.9434	-0.958584	1.9434	up
Kif20a	-2.26592	-1.1801	2.26592	up
Cdc25c	-2.19366	-1.13334	2.19366	up
Ctnna1	-1.66812	-0.738227	1.66812	up
1700066B19Rik	-3.20749	-1.68145	3.20749	up
Prelid2	-1.7473	-0.805124	1.7473	up
Lmnb1	-2.15134	-1.10523	2.15134	up
Prrc1	-1.64891	-0.72151	1.64891	up
Pcyox1l	-1.61627	-0.692672	1.61627	up
Txnl1	-1.52926	-0.612832	1.52926	up
Lman1	-1.71567	-0.77877	1.71567	up
Pmaip1	-1.72213	-0.784191	1.72213	up
Impa2	-1.60995	-0.68702	1.60995	up
Cep76	-1.67496	-0.744128	1.67496	up
n-R5-8s1	-1.90094	-0.926716	1.90094	up
Ska1	-2.21229	-1.14554	2.21229	up
Ctif	-1.69338	-0.759903	1.69338	up
Pqlc1	-1.5569	-0.638679	1.5569	up
Rttn	-1.59054	-0.669516	1.59054	up
Unc93b1	-1.53285	-0.616221	1.53285	up
Banf1	-1.66352	-0.734243	1.66352	up
Ctsw	-2.82523	-1.49837	2.82523	up
Kcnk7	-2.01536	-1.01103	2.01536	up
Ehbp1l1	-1.71824	-0.780928	1.71824	up
Fam89b	-1.8391	-0.879004	1.8391	up
Sssca1	-1.78402	-0.835133	1.78402	up
Pola2	-1.70705	-0.771501	1.70705	up
Cdca5	-2.00977	-1.00703	2.00977	up
Sac3d1	-1.70567	-0.770338	1.70567	up
Pygm	-2.11651	-1.08169	2.11651	up
Rasgrp2	-1.83463	-0.875491	1.83463	up
Fkbp2	-2.30327	-1.20369	2.30327	up
Rom1	-1.6514	-0.723692	1.6514	up
Incenp	-1.67423	-0.743497	1.67423	up
Gm10143	-1.84917	-0.886876	1.84917	up
Fen1	-1.89037	-0.918667	1.89037	up
Slc15a3	-2.20884	-1.14329	2.20884	up
Tmem109	-2.46424	-1.30114	2.46424	up
Prpf19	-1.57326	-0.653753	1.57326	up
AW112010	-1.69684	-0.762848	1.69684	up
Mrpl16	-1.56038	-0.641896	1.56038	up
Fam111a	-1.79194	-0.841523	1.79194	up
Cep78	-1.86445	-0.898753	1.86445	up
Tjp2	-1.88352	-0.913431	1.88352	up
Cbwd1	-1.85132	-0.888556	1.85132	up
Ak3	-1.93724	-0.954003	1.93724	up
Insl6	-2.37794	-1.24971	2.37794	up
Pdcd1lg2	-1.65111	-0.723434	1.65111	up
Kif20b	-1.60143	-0.679364	1.60143	up
Rpp30	-1.75757	-0.813584	1.75757	up
Kif11	-2.00364	-1.00263	2.00364	up
Cep55	-2.17283	-1.11957	2.17283	up
Hells	-2.28519	-1.19231	2.28519	up
Entpd1	-1.56797	-0.648899	1.56797	up
Pik3ap1	-2.78109	-1.47565	2.78109	up
Arhgap19	-2.08413	-1.05945	2.08413	up
Entpd7	-1.55067	-0.632893	1.55067	up
Dpcd	-1.61856	-0.694714	1.61856	up
Npm3	-1.53541	-0.618629	1.53541	up
2010012O05Rik	-1.55542	-0.637308	1.55542	up
As3mt	-2.12746	-1.08913	2.12746	up
Gsto1	-2.94776	-1.55962	2.94776	up
Mxi1	-1.51959	-0.603682	1.51959	up
Smc3	-1.58637	-0.66573	1.58637	up
Acsl5	-1.61445	-0.691042	1.61445	up
Dclre1a	-2.05344	-1.03804	2.05344	up
Plp2	-1.93044	-0.948927	1.93044	up
Suv39h1	-1.76733	-0.82157	1.76733	up
Ebp	-1.50346	-0.588284	1.50346	up
Mid1ip1	-1.57205	-0.652645	1.57205	up
Rp2h	-1.50349	-0.588317	1.50349	up
Rbmx2	-1.74858	-0.806181	1.74858	up
Mbnl3	-1.66735	-0.737553	1.66735	up
Hprt	-1.57039	-0.651124	1.57039	up
Gm14680	-1.83274	-0.874	1.83274	up
Hmgb3	-1.60116	-0.679117	1.60116	up
Bcap31	-1.55555	-0.637425	1.55555	up
Abcd1	-1.54623	-0.628757	1.54623	up
L1cam	-1.7119	-0.775602	1.7119	up
5430427O19Rik	-2.16096	-1.11167	2.16096	up
Pola1	-1.72999	-0.790764	1.72999	up
Pcyt1b	-2.95226	-1.56182	2.95226	up
Kif4	-1.86318	-0.897766	1.86318	up
Cxcr3	-1.67795	-0.746701	1.67795	up
Nhsl2	-2.22549	-1.15412	2.22549	up
Ercc6l	-1.83524	-0.875965	1.83524	up
Magt1	-1.93846	-0.954913	1.93846	up
Pgk1	-1.52032	-0.60438	1.52032	up
Hmgn5	-1.56918	-0.650011	1.56918	up
Cenpi	-2.27909	-1.18846	2.27909	up
Armcx4	-1.70611	-0.770707	1.70611	up
Prps1	-1.52309	-0.607001	1.52309	up
Gm6382	-1.74846	-0.806088	1.74846	up
Klf8	-2.20437	-1.14037	2.20437	up
Prdx4	-1.74881	-0.80637	1.74881	up
Sms	-1.65824	-0.72965	1.65824	up
Rbbp7	-1.57408	-0.654513	1.57408	up
Car5b	-2.55488	-1.35326	2.55488	up
Siah1b	-2.15	-1.10434	2.15	up
Piga	-1.54359	-0.626286	1.54359	up
Fancb	-1.74961	-0.807031	1.74961	up
Gm15232	-1.96427	-0.973994	1.96427	up

## Sheet: MAL_down_1351_d7
Gene Symbol	FC	Log FC	FC (abs)	Regulation KO vs WT
Pcmtd1	1.55469	0.636629	1.55469	down
AC103380.1	2.82574	1.49863	2.82574	down
AC136316.1	1.70878	0.772971	1.70878	down
Arhgef4	2.04258	1.03039	2.04258	down
Hs6st1	1.64849	0.721141	1.64849	down
Neurl3	1.5255	0.609278	1.5255	down
Arid5a	1.76708	0.821369	1.76708	down
Fer1l5	2.57954	1.36711	2.57954	down
Ankrd23	1.82533	0.868154	1.82533	down
Aff3	3.52799	1.81885	3.52799	down
Chst10	1.59141	0.67031	1.59141	down
Il1r1	5.95469	2.57403	5.95469	down
Pgap1	1.78732	0.837794	1.78732	down
Plcl1	3.04606	1.60694	3.04606	down
Clk1	1.66921	0.739168	1.66921	down
Ica1l	7.85175	2.97301	7.85175	down
Carf	1.50367	0.588489	1.50367	down
Nbeal1	1.76917	0.823076	1.76917	down
Ctla4	1.74673	0.804654	1.74673	down
Icos	1.8941	0.921513	1.8941	down
Klf7	1.5665	0.647543	1.5665	down
AL645646.1	1.61605	0.692474	1.61605	down
Plekhm3	1.60567	0.683175	1.60567	down
Idh1	1.54231	0.625091	1.54231	down
Pikfyve	1.59798	0.676251	1.59798	down
Kansl1l	2.4006	1.26339	2.4006	down
Ikzf2	4.42533	2.14579	4.42533	down
Dnajb2	1.9649	0.974453	1.9649	down
Acsl3	4.1613	2.05703	4.1613	down
Utp14b	5.0948	2.34903	5.0948	down
Wdfy1	1.93962	0.955772	1.93962	down
A630001G21Rik	1.60993	0.687001	1.60993	down
Armc9	2.13412	1.09364	2.13412	down
Ramp1	2.26667	1.18058	2.26667	down
Per2	1.50224	0.587113	1.50224	down
Hdac4	1.66774	0.737891	1.66774	down
Hdac4	1.59087	0.669813	1.59087	down
AC111074.1	1.54775	0.63017	1.54775	down
Bcl2	2.39461	1.25979	2.39461	down
Dsel	1.53635	0.619507	1.53635	down
Mgat5	1.83632	0.87682	1.83632	down
Gm15674	3.20573	1.68065	3.20573	down
Pfkfb2	1.64824	0.720926	1.64824	down
Il10	6.73155	2.75094	6.73155	down
Ikbke	1.60853	0.685745	1.60853	down
Ctse	1.80927	0.855409	1.80927	down
Slc41a1	2.3303	1.22052	2.3303	down
Elk4	1.61218	0.689017	1.61218	down
Mfsd4	1.63957	0.71332	1.63957	down
Nuak2	1.8282	0.870426	1.8282	down
Dstyk	2.04844	1.03452	2.04844	down
Kdm5b	2.40221	1.26436	2.40221	down
Zfp281	2.07633	1.05403	2.07633	down
Rgs2	1.57062	0.651334	1.57062	down
Gm15443	1.52256	0.606498	1.52256	down
Prg4	3.33552	1.73791	3.33552	down
Rabgap1l	2.25346	1.17214	2.25346	down
Zbtb37	1.56713	0.648124	1.56713	down
Sell	3.16442	1.66194	3.16442	down
Atp1b1	3.55233	1.82876	3.55233	down
Dcaf6	1.55686	0.638638	1.55686	down
Cd84	1.59458	0.673176	1.59458	down
Gm10521	2.47037	1.30473	2.47037	down
Slamf6	2.07815	1.0553	2.07815	down
Pydc4	2.02189	1.01571	2.02189	down
Pydc3	2.28224	1.19045	2.28224	down
Ifi204	4.88364	2.28796	4.88364	down
Zfp238	1.98221	0.987113	1.98221	down
Sccpdh	29.0239	4.85917	29.0239	down
Adck3	2.00493	1.00355	2.00493	down
Itpkb	1.54702	0.629492	1.54702	down
Tmem63a	1.75075	0.807969	1.75075	down
2210411M09Rik	1.57272	0.653258	1.57272	down
Ephx1	4.45223	2.15453	4.45223	down
Susd4	5.57609	2.47925	5.57609	down
Dusp10	1.95609	0.967969	1.95609	down
Rps6kc1	1.87548	0.90726	1.87548	down
D730003I15Rik	1.68163	0.749863	1.68163	down
Irf6	2.08358	1.05907	2.08358	down
Plxna2	1.59654	0.674949	1.59654	down
Frmd4a	2.53262	1.34063	2.53262	down
Usp6nl	2.84884	1.51037	2.84884	down
7SK	2.28074	1.1895	2.28074	down
Gm13217	1.73164	0.792138	1.73164	down
Pfkfb3	1.52668	0.610394	1.52668	down
St8sia6	2.02844	1.02037	2.02844	down
4930426L09Rik	1.74261	0.801249	1.74261	down
Otud1	1.77008	0.823811	1.77008	down
Gad2	1.55811	0.639797	1.55811	down
Pnpla7	1.95761	0.969097	1.95761	down
Dpp7	1.77882	0.830919	1.77882	down
Nacc2	2.07623	1.05397	2.07623	down
Card9	3.28787	1.71715	3.28787	down
AL732311.1	1.56584	0.646937	1.56584	down
Slc2a6	1.66847	0.738527	1.66847	down
Zer1	1.56847	0.649356	1.56847	down
Ttc16	1.51517	0.599477	1.51517	down
Ptrh1	2.90261	1.53735	2.90261	down
Stxbp1	2.93019	1.551	2.93019	down
Ralgps1	2.10587	1.07441	2.10587	down
Angptl2	8.931	3.15882	8.931	down
Fam125b	1.63205	0.706682	1.63205	down
Gsn	1.69002	0.75704	1.69002	down
Stom	2.24679	1.16787	2.24679	down
Scai	1.83082	0.87249	1.83082	down
Acvr2a	2.10247	1.07209	2.10247	down
Kif5c	1.66419	0.734821	1.66419	down
Lypd6b	2.65161	1.40687	2.65161	down
Neb	2.97927	1.57496	2.97927	down
Dapl1	3.46863	1.79436	3.46863	down
Wdsub1	1.53069	0.614178	1.53069	down
Baz2b	1.62221	0.697961	1.62221	down
Dpp4	4.00361	2.0013	4.00361	down
Ifih1	2.36869	1.24409	2.36869	down
Metap1d	1.74922	0.806712	1.74922	down
Pdk1	2.0076	1.00547	2.0076	down
Rapgef4	2.60073	1.37891	2.60073	down
Gm13634	1.98457	0.988826	1.98457	down
BB114351	3.05182	1.60967	3.05182	down
Sp9	1.67184	0.741433	1.67184	down
Cir1	1.63239	0.706982	1.63239	down
Gpr155	3.84708	1.94376	3.84708	down
Gm13704	6.37328	2.67204	6.37328	down
Nfe2l2	1.52902	0.612609	1.52902	down
Prkra	1.92826	0.947303	1.92826	down
Calcrl	1.54799	0.630393	1.54799	down
Ypel4	2.7213	1.44429	2.7213	down
Slc43a1	7.16886	2.84174	7.16886	down
Slc39a13	1.61741	0.693681	1.61741	down
Gm9821	2.88186	1.527	2.88186	down
Phf21a	1.66425	0.734873	1.66425	down
Abtb2	1.75868	0.814496	1.75868	down
Qser1	2.47095	1.30506	2.47095	down
Prrg4	2.49706	1.32023	2.49706	down
Ryr3	2.80123	1.48606	2.80123	down
Pak6	2.07765	1.05495	2.07765	down
Plcb2	2.0451	1.03217	2.0451	down
Capn3	2.5764	1.36536	2.5764	down
Ttbk2	1.90451	0.929417	1.90451	down
Shf	2.43785	1.28561	2.43785	down
Bambi-ps1	4.39125	2.13463	4.39125	down
Gm14085	3.7707	1.91483	3.7707	down
Sqrdl	5.79992	2.53603	5.79992	down
Eid1	2.5856	1.3705	2.5856	down
Gm17555	1.55064	0.632862	1.55064	down
Zfp661	2.2153	1.1475	2.2153	down
4933427J07Rik	1.63295	0.707484	1.63295	down
Smox	4.30064	2.10455	4.30064	down
Prnp	1.57969	0.659637	1.57969	down
Gpcpd1	1.62583	0.701176	1.62583	down
Tasp1	1.98818	0.991449	1.98818	down
Rbbp9	1.70101	0.766394	1.70101	down
Insm1	3.20587	1.68072	3.20587	down
Gzf1	1.62874	0.703756	1.62874	down
Zfp120	1.80215	0.849719	1.80215	down
Zfp937	1.69466	0.760993	1.69466	down
Gm10749	2.08035	1.05682	2.08035	down
3300002I08Rik	1.75473	0.811246	1.75473	down
Zfp442	2.65907	1.41092	2.65907	down
Acss1	1.96378	0.973636	1.96378	down
Sdcbp2	1.60704	0.684406	1.60704	down
Trib3	1.75733	0.813384	1.75733	down
Gm14278	1.90174	0.927323	1.90174	down
Src	2.3334	1.22244	2.3334	down
Blcap	1.56737	0.648349	1.56737	down
Tgm2	2.09398	1.06625	2.09398	down
Lbp	3.46017	1.79084	3.46017	down
Plcg1	1.60286	0.680647	1.60286	down
Chd6	1.94521	0.959924	1.94521	down
Tox2	8.10268	3.0184	8.10268	down
Slpi	3.66713	1.87465	3.66713	down
Sdc4	1.74491	0.803153	1.74491	down
Pltp	1.83882	0.878777	1.83882	down
Mmp9	6.15785	2.62243	6.15785	down
Cd40	1.76003	0.815603	1.76003	down
Eya2	1.90174	0.927322	1.90174	down
Fam65c	2.73244	1.45019	2.73244	down
Atp9a	4.58551	2.19708	4.58551	down
Zfp217	1.62865	0.703677	1.62865	down
2010011I20Rik	2.09581	1.06751	2.09581	down
Cass4	1.84827	0.886174	1.84827	down
Bmp7	5.52581	2.46618	5.52581	down
Spo11	1.64087	0.71446	1.64087	down
Ppp4r1l-ps	1.80805	0.854433	1.80805	down
Stx16	1.51111	0.595612	1.51111	down
Zfp831	2.7678	1.46874	2.7678	down
Gm14443	1.7279	0.789022	1.7279	down
Gm14440	1.90783	0.931934	1.90783	down
Gm4631	1.64857	0.721211	1.64857	down
Gm8923	1.81087	0.856679	1.81087	down
Gm8898	2.95106	1.56123	2.95106	down
Gm14296	1.53566	0.618856	1.53566	down
Gm14420	1.65836	0.729758	1.65836	down
Gm14325	1.87057	0.903478	1.87057	down
Etohi1	1.58934	0.668426	1.58934	down
BX284639.1	1.63747	0.711466	1.63747	down
Zfp931	1.77498	0.827799	1.77498	down
Ss18l1	1.6859	0.753517	1.6859	down
Gm14340	1.60402	0.681695	1.60402	down
9230112E08Rik	1.58252	0.662225	1.58252	down
Col20a1	1.69632	0.762406	1.69632	down
Znf512b	2.0001	1.00007	2.0001	down
Tcea2	1.56792	0.648849	1.56792	down
Pcmtd2	1.6785	0.74717	1.6785	down
Hey1	2.04142	1.02957	2.04142	down
Tpd52	1.73357	0.793745	1.73357	down
Zbtb10	2.62158	1.39044	2.62158	down
AC140312.1	106.5	6.73472	106.5	down
Car2	5.77187	2.52904	5.77187	down
Ccdc144b	1.64545	0.718482	1.64545	down
4932438A13Rik	2.03811	1.02723	2.03811	down
Il21	3.5738	1.83746	3.5738	down
Spry1	2.87237	1.52224	2.87237	down
Mgarp	2.6091	1.38355	2.6091	down
AC102860.1	2.09441	1.06655	2.09441	down
Mgst2	2.10316	1.07256	2.10316	down
Maml3	2.73494	1.45151	2.73494	down
P2ry14	2.01424	1.01023	2.01424	down
Rapgef2	1.71679	0.779711	1.71679	down
Gucy1b3	2.15492	1.10763	2.15492	down
Gucy1a3	3.53598	1.82211	3.53598	down
D930015E06Rik	1.81042	0.856326	1.81042	down
Trim2	2.2501	1.16999	2.2501	down
Fhdc1	2.5936	1.37496	2.5936	down
Fcrl1	4.97333	2.31421	4.97333	down
Arhgef11	2.50475	1.32467	2.50475	down
Lrrc71	2.14052	1.09796	2.14052	down
Pear1	2.43844	1.28596	2.43844	down
Mex3a	1.75413	0.810757	1.75413	down
Syt11	1.75532	0.811737	1.75532	down
Ash1l	1.9423	0.957762	1.9423	down
Hcn3	3.23859	1.69536	3.23859	down
Gm16069	1.67321	0.742623	1.67321	down
Il6ra	3.67928	1.87942	3.67928	down
1700094D03Rik	1.55367	0.63568	1.55367	down
Rps27	1.56476	0.645937	1.56476	down
S100a9	3.13967	1.65061	3.13967	down
Ctss	1.56696	0.647968	1.56696	down
Ecm1	2.08167	1.05774	2.08167	down
Gm129	2.48534	1.31345	2.48534	down
Plekho1	4.8027	2.26384	4.8027	down
Sv2a	1.74384	0.802264	1.74384	down
Gm15441	2.80807	1.48958	2.80807	down
Txnip	2.89759	1.53485	2.89759	down
Itga10	1.60254	0.680357	1.60254	down
Acp6	1.53417	0.617455	1.53417	down
Bcl9	2.28565	1.19261	2.28565	down
Prkab2	1.68653	0.754054	1.68653	down
Hsd3b2	1.52247	0.606414	1.52247	down
Gm12474	2.92945	1.55063	2.92945	down
Igsf3	1.56137	0.642809	1.56137	down
Ampd1	2.6234	1.39144	2.6234	down
Chi3l7	3.11389	1.63872	3.11389	down
2010016I18Rik	2.68146	1.42302	2.68146	down
Dennd2d	2.79248	1.48155	2.79248	down
Kcna3	1.63768	0.711658	1.63768	down
AI504432	1.66092	0.73198	1.66092	down
Csf1	2.47275	1.30611	2.47275	down
Vcam1	2.50055	1.32225	2.50055	down
Cnn3	2.91248	1.54225	2.91248	down
Arhgap29	3.1372	1.64948	3.1372	down
Usp53	1.56445	0.64566	1.56445	down
Prss12	4.50687	2.17212	4.50687	down
Camk2d	1.79452	0.843595	1.79452	down
Elovl6	1.75546	0.811846	1.75546	down
Lef1	1.50274	0.587591	1.50274	down
Slc39a8	1.56625	0.647317	1.56625	down
Bank1	2.01697	1.01219	2.01697	down
Gm17316	1.6474	0.720187	1.6474	down
Dapp1	1.51009	0.594639	1.51009	down
Tspan5	2.10723	1.07535	2.10723	down
Gbp1	15.3057	3.936	15.3057	down
Gbp2	1.65592	0.727629	1.65592	down
Lmo4	1.61791	0.694132	1.61791	down
Wls	1.68339	0.751369	1.68339	down
Lyn	1.85538	0.891713	1.85538	down
Tox	2.03135	1.02244	2.03135	down
2610301B20Rik	1.51134	0.595832	1.51134	down
Trp53inp1	3.0087	1.58914	3.0087	down
Rbm12b2	1.51974	0.60382	1.51974	down
Tmem64	2.56493	1.35892	2.56493	down
Cpne3	1.92692	0.946296	1.92692	down
Fam82b	1.67871	0.747354	1.67871	down
Bach2	2.77596	1.47299	2.77596	down
BC024582	2.60012	1.37858	2.60012	down
Mdn1	1.74405	0.802441	1.74405	down
Ankrd6	1.7752	0.827978	1.7752	down
Gabrr2	3.555	1.82985	3.555	down
Srsf12	2.1191	1.08345	2.1191	down
Zfp292	1.53937	0.62234	1.53937	down
Mob3b	2.09068	1.06397	2.09068	down
3110043O21Rik	1.89626	0.923154	1.89626	down
Aqp3	1.53725	0.620352	1.53725	down
B230312A22Rik	1.72717	0.788414	1.72717	down
Tmem8b	2.03507	1.02508	2.03507	down
Fbxo10	1.73763	0.797122	1.73763	down
Hemgn	6.80461	2.76651	6.80461	down
Gm16731	4.39947	2.13733	4.39947	down
Abca1	2.05725	1.04072	2.05725	down
Ugcg	1.6673	0.73751	1.6673	down
Susd1	3.4949	1.80525	3.4949	down
Snx30	1.63558	0.709799	1.63558	down
Gm12543	3.3208	1.73153	3.3208	down
Gm12567	2.11874	1.08321	2.11874	down
Gm12573	2.01296	1.00932	2.01296	down
Whrn	2.97057	1.57074	2.97057	down
Tnfsf8	6.15258	2.62119	6.15258	down
Tle1	1.62195	0.697726	1.62195	down
Ccdc171	1.68822	0.755499	1.68822	down
Acer2	2.34362	1.22874	2.34362	down
Jun	1.53427	0.617549	1.53427	down
Nfia	2.66129	1.41213	2.66129	down
Inadl	2.64811	1.40496	2.64811	down
E130102H24Rik	1.80249	0.849994	1.80249	down
Hspb11	1.551	0.633197	1.551	down
9630013D21Rik	2.16854	1.11673	2.16854	down
Cyp4x1	1.56066	0.642159	1.56066	down
Mob3c	1.63641	0.710538	1.63641	down
Ccdc17	2.66107	1.41201	2.66107	down
Ptprf	2.45471	1.29556	2.45471	down
Hyi	1.68012	0.74856	1.68012	down
Ermap	5.21115	2.3816	5.21115	down
Lepre1	1.51291	0.597325	1.51291	down
Ccdc30	1.67111	0.740806	1.67111	down
Hivep3	2.14181	1.09883	2.14181	down
Macf1	1.69407	0.760494	1.69407	down
Fhl3	1.8017	0.849358	1.8017	down
9930104L06Rik	1.51559	0.599882	1.51559	down
Eif2c3	1.80173	0.849387	1.80173	down
Zmym6	1.92241	0.942914	1.92241	down
Dcdc2b	3.429	1.77779	3.429	down
D4Wsu53e	1.53769	0.620769	1.53769	down
Ncmap	2.45924	1.29821	2.45924	down
Cnr2	3.14141	1.65141	3.14141	down
Id3	2.53971	1.34467	2.53971	down
Ece1	1.55859	0.640238	1.55859	down
Pink1	1.54028	0.623188	1.54028	down
Iffo2	2.4687	1.30375	2.4687	down
RP23-334I5.4	2.06514	1.04624	2.06514	down
Aldh4a1	1.76584	0.820355	1.76584	down
Vps13d	1.50544	0.590181	1.50544	down
Mthfr	1.51266	0.597087	1.51266	down
Kif1b	1.64404	0.717247	1.64404	down
Spsb1	2.24131	1.16434	2.24131	down
Rere	2.52071	1.33383	2.52071	down
Errfi1	1.56478	0.645958	1.56478	down
Per3	1.90291	0.92821	1.90291	down
Espn	1.68037	0.74878	1.68037	down
Tnfrsf14	2.21536	1.14754	2.21536	down
Prkcz	1.65968	0.730904	1.65968	down
Mib2	1.83186	0.87331	1.83186	down
B930041F14Rik	1.5339	0.617208	1.5339	down
Agrn	1.74477	0.803038	1.74477	down
Isg15	1.62653	0.701797	1.62653	down
AW011738	2.11056	1.07762	2.11056	down
2310042D19Rik	2.25737	1.17464	2.25737	down
Plekhn1	1.85722	0.893148	1.85722	down
Samd11	5.59063	2.48301	5.59063	down
Cdk6	2.16311	1.11311	2.16311	down
Rundc3b	1.62839	0.703445	1.62839	down
AC137938.1	1.53346	0.616791	1.53346	down
Mll3	1.70973	0.773772	1.70973	down
Rnf32	4.2555	2.08933	4.2555	down
Lmbr1	1.82846	0.870631	1.82846	down
Ccdc164	1.53139	0.614845	1.53139	down
Mapre3	2.6914	1.42835	2.6914	down
Krtcap3	1.553	0.635059	1.553	down
Ift172	1.57118	0.651853	1.57118	down
4933407H18Rik	1.7688	0.822772	1.7688	down
Mxd4	2.24256	1.16515	2.24256	down
Zfyve28	2.42945	1.28063	2.42945	down
Fam193a	1.50966	0.594228	1.50966	down
Tnip2	1.62526	0.700673	1.62526	down
Grk4	1.60481	0.682401	1.60481	down
Afap1	2.21826	1.14943	2.21826	down
Slc2a9	1.57181	0.652424	1.57181	down
Gm10025	1.6588	0.73014	1.6588	down
RP24-448C16.2	2.00874	1.00629	2.00874	down
Tlr1	2.70678	1.43658	2.70678	down
Tmem156	1.92393	0.944059	1.92393	down
Klhl5	1.59718	0.675526	1.59718	down
Wdr19	1.68327	0.75127	1.68327	down
Rhoh	1.66178	0.732732	1.66178	down
Igj	2.36176	1.23986	2.36176	down
Adamts3	2.10899	1.07655	2.10899	down
Afp	1.93858	0.954997	1.93858	down
Cxcl10	1.86048	0.895673	1.86048	down
Antxr2	2.54795	1.34934	2.54795	down
Ptpn13	1.53068	0.614176	1.53068	down
Aff1	1.50821	0.592836	1.50821	down
Hsd17b11	1.91646	0.938446	1.91646	down
BC005561	1.50511	0.58987	1.50511	down
AC123687.1	1.57917	0.659165	1.57917	down
Zfp951	1.51309	0.597495	1.51309	down
Gbp8	1.77549	0.82822	1.77549	down
Gbp9	1.90783	0.931933	1.90783	down
Gbp11	2.84959	1.51076	2.84959	down
Tgfbr3	1.88429	0.914025	1.88429	down
Brdt	2.08986	1.06341	2.08986	down
A830010M20Rik	1.55393	0.635919	1.55393	down
Idua	1.69817	0.763977	1.69817	down
Plcxd1	1.56977	0.650551	1.56977	down
A630023P12Rik	4.30031	2.10444	4.30031	down
Galnt9	3.01431	1.59183	3.01431	down
Ulk1	1.84131	0.880732	1.84131	down
Ttc28	2.22501	1.15381	2.22501	down
Mmab	1.55556	0.637434	1.55556	down
Mvk	1.758	0.813937	1.758	down
Oasl2	1.86791	0.901425	1.86791	down
Oasl1	2.07175	1.05085	2.07175	down
Ksr2	2.26841	1.18168	2.26841	down
Tesc	1.69812	0.763936	1.69812	down
Oas2	2.02766	1.01981	2.02766	down
Aldh2	1.72482	0.786445	1.72482	down
Acad10	2.53301	1.34086	2.53301	down
Sh2b3	3.08282	1.62425	3.08282	down
Fam109a	2.87222	1.52217	2.87222	down
Pptc7	1.66435	0.734962	1.66435	down
P2rx7	3.84821	1.94419	3.84821	down
A930024E05Rik	1.54434	0.626995	1.54434	down
Tmem120b	1.64437	0.717531	1.64437	down
Wdr66	3.14925	1.65501	3.14925	down
Pitpnm2	1.70524	0.769972	1.70524	down
Gm17132	1.60248	0.680308	1.60248	down
Gm17131	1.65699	0.728568	1.65699	down
Wbscr27	4.51059	2.17332	4.51059	down
Stx1a	1.66042	0.731549	1.66042	down
Rhbdd2	1.77013	0.823855	1.77013	down
Por	1.70184	0.767098	1.70184	down
Trip6	1.79754	0.846023	1.79754	down
Slc12a9	1.65713	0.728683	1.65713	down
Zan	8.12455	3.02229	8.12455	down
Gigyf1	1.88856	0.91729	1.88856	down
Zkscan1	1.54977	0.632058	1.54977	down
BC037034	1.62531	0.700719	1.62531	down
Ttyh3	1.76476	0.819469	1.76476	down
Zfp12	1.74861	0.806211	1.74861	down
Cyth3	1.59307	0.671806	1.59307	down
Ankrd61	3.3371	1.73859	3.3371	down
Tecpr1	1.67552	0.744609	1.67552	down
Gm15708	3.13027	1.64629	3.13027	down
Zkscan14	1.64748	0.72026	1.64748	down
Lnx2	1.91092	0.934268	1.91092	down
Pan3	1.56197	0.643364	1.56197	down
N4bp2l1	1.51371	0.59809	1.51371	down
Samd9l	1.64044	0.714084	1.64044	down
Glcci1	1.78743	0.83789	1.78743	down
Gm16042	1.74778	0.805522	1.74778	down
Slc13a1	1.55014	0.632399	1.55014	down
Ube2h	1.6126	0.689392	1.6126	down
AB041803	2.48028	1.3105	2.48028	down
Tmem140	1.6501	0.722555	1.6501	down
Ubn2	1.53348	0.616806	1.53348	down
Jhdm1d	1.52602	0.609778	1.52602	down
Slc37a3	1.56769	0.64864	1.56769	down
Trbv13-3	1.78606	0.836783	1.78606	down
Trbv20	1.74323	0.801762	1.74323	down
Trbv23	1.67936	0.747909	1.67936	down
Trbv26	1.59978	0.677877	1.59978	down
Gstk1	1.72328	0.785155	1.72328	down
Zfp783	1.63062	0.705424	1.63062	down
Krba1	1.55691	0.638688	1.55691	down
Ccdc126	2.50249	1.32337	2.50249	down
2410066E13Rik	2.22753	1.15544	2.22753	down
Aqp1	8.7582	3.13063	8.7582	down
Metazoa_SRP	2.17564	1.12144	2.17564	down
Hpgds	4.34664	2.1199	4.34664	down
Gadd45a	2.19017	1.13104	2.19017	down
E230016M11Rik	2.16674	1.11553	2.16674	down
Igkc	2.79619	1.48346	2.79619	down
Rnf103	1.51146	0.595942	1.51146	down
Vamp5	2.03905	1.02789	2.03905	down
Tet3	1.6098	0.686879	1.6098	down
Sfxn5	2.26024	1.17648	2.26024	down
AC158662.2	1.52576	0.609531	1.52576	down
Arhgap25	1.52295	0.606871	1.52295	down
Txnrd3	1.91228	0.935294	1.91228	down
Slc41a3	1.58392	0.6635	1.58392	down
Lrig1	3.2011	1.67857	3.2011	down
Foxp1	1.72401	0.785765	1.72401	down
AC122929.1	1.60747	0.684793	1.60747	down
AC153591.1	1.69625	0.762351	1.69625	down
Ttll3	1.56343	0.644717	1.56343	down
Plxnd1	1.93258	0.950529	1.93258	down
Tmcc1	1.76456	0.819305	1.76456	down
Gm20404	1.59906	0.677221	1.59906	down
Cacna2d4	2.97792	1.57431	2.97792	down
Mical3	1.8334	0.874521	1.8334	down
A330044P14Rik	1.69797	0.763807	1.69797	down
Grcc10	1.71609	0.779124	1.71609	down
Atn1	1.76523	0.819854	1.76523	down
Lrrc23	2.99069	1.58048	2.99069	down
Acrbp	2.26434	1.17909	2.26434	down
Vamp1	2.38293	1.25274	2.38293	down
Cd27	1.88784	0.916735	1.88784	down
Ccnd2	2.11898	1.08337	2.11898	down
Gm5884	1.61903	0.695127	1.61903	down
Klrb1c	5.5345	2.46845	5.5345	down
Klrb1f	2.04472	1.0319	2.04472	down
Clec2d	1.50005	0.585006	1.50005	down
AC142191.1	2.28961	1.1951	2.28961	down
Crebl2	2.67183	1.41783	2.67183	down
Cdkn1b	1.77673	0.829222	1.77673	down
Atf7ip	1.55739	0.639126	1.55739	down
Ldhb	2.09079	1.06405	2.09079	down
St8sia1	2.10545	1.07413	2.10545	down
Gm15706	2.37198	1.24609	2.37198	down
Itpr2	2.20093	1.13811	2.20093	down
Klhdc5	1.63146	0.706163	1.63146	down
Tmc4	2.25912	1.17576	2.25912	down
Leng9	1.66661	0.73692	1.66661	down
Nat14	2.57898	1.3668	2.57898	down
Zfp579	2.62345	1.39147	2.62345	down
Vmn1r58	1.63325	0.707749	1.63325	down
Vmn1r65	1.50263	0.587485	1.50263	down
Zfp667	2.37748	1.24943	2.37748	down
Zfp28	2.29308	1.19729	2.29308	down
Zfp773	2.54316	1.34662	2.54316	down
Zfp418	2.76933	1.46954	2.76933	down
Zfp551	3.20996	1.68255	3.20996	down
Zscan18	2.63191	1.39611	2.63191	down
Meis3	2.52439	1.33593	2.52439	down
Hif3a	2.63798	1.39943	2.63798	down
Apoe	2.07241	1.05131	2.07241	down
Gm16184	2.03002	1.0215	2.03002	down
Igsf23	1.72604	0.787466	1.72604	down
Plaur	2.89736	1.53474	2.89736	down
Atp1a3	4.09956	2.03547	4.09956	down
Bckdha	1.52556	0.609341	1.52556	down
Cyp2s1	1.62454	0.700029	1.62454	down
AC119211.2	1.62589	0.701227	1.62589	down
Egln2	1.53289	0.616253	1.53289	down
Blvrb	2.47632	1.3082	2.47632	down
Zfp607	1.51661	0.600848	1.51661	down
1700049G17Rik	2.06224	1.04421	2.06224	down
Dyrk1b	1.69449	0.760848	1.69449	down
Plekhg2	2.11221	1.07875	2.11221	down
Zfp36	2.14082	1.09816	2.14082	down
Fbxo17	1.71677	0.779698	1.71677	down
Rasgrp4	1.67248	0.741987	1.67248	down
Fam98c	1.64236	0.715772	1.64236	down
Zfp420	1.73561	0.795442	1.73561	down
Hcst	1.71598	0.77903	1.71598	down
Aplp1	1.56297	0.644292	1.56297	down
Tmem149	1.6687	0.738724	1.6687	down
Ffar2	2.08277	1.05851	2.08277	down
Gramd1a	1.52676	0.610471	1.52676	down
Gm12763	2.37164	1.24589	2.37164	down
Gm12764	1.59951	0.677627	1.59951	down
Cebpa	25.8383	4.69144	25.8383	down
Dpy19l3	2.00011	1.00008	2.00011	down
Zfp619	1.90908	0.932876	1.90908	down
Gm5595	1.89972	0.925787	1.89972	down
Ptov1	2.19141	1.13186	2.19141	down
Rras	1.73088	0.791508	1.73088	down
Tulp2	2.08425	1.05953	2.08425	down
Ppp1r15a	1.53406	0.617357	1.53406	down
Dbp	2.73401	1.45102	2.73401	down
Nav2	10.8485	3.43943	10.8485	down
Peg12	1.79553	0.84441	1.79553	down
AC127595.1	585.908	9.19453	585.908	down
Igf1r	4.49774	2.1692	4.49774	down
Pgpep1l	2.39881	1.26232	2.39881	down
Arrdc4	2.02779	1.01991	2.02779	down
Ntrk3	6.02837	2.59177	6.02837	down
Zfp710	1.62104	0.696921	1.62104	down
Sema4b	1.70217	0.767372	1.70217	down
Crtc3	1.54896	0.6313	1.54896	down
Zscan2	1.85614	0.892306	1.85614	down
Fsd2	2.12636	1.08839	2.12636	down
Sh3gl3	2.18486	1.12754	2.18486	down
Tmc3	5.37301	2.42573	5.37301	down
Il16	1.87687	0.908325	1.87687	down
Arnt2	106.014	6.72811	106.014	down
Gm20413	2.79591	1.48332	2.79591	down
Usp35	1.96005	0.970892	1.96005	down
AC119880.1	1.76972	0.823525	1.76972	down
Arrb1	2.1249	1.0874	2.1249	down
Rnf169	1.56525	0.646393	1.56525	down
Fam168a	1.76714	0.821419	1.76714	down
Fchsd2	1.5642	0.645429	1.5642	down
Stard10	1.91773	0.939398	1.91773	down
Il18bp	1.55946	0.641047	1.55946	down
Olfr613	1.69334	0.759876	1.69334	down
Trim34a	1.6976	0.763493	1.6976	down
Trim12a	1.64908	0.721663	1.64908	down
Trim30d	1.64234	0.715753	1.64234	down
Gm4759	1.61594	0.692373	1.61594	down
Sbf2	2.77184	1.47084	2.77184	down
Ampd3	3.84623	1.94345	3.84623	down
Plekha7	2.04407	1.03144	2.04407	down
Pik3c2a	2.39077	1.25747	2.39077	down
Nucb2	4.59391	2.19972	4.59391	down
Smg1	1.58135	0.661154	1.58135	down
Gprc5b	2.62281	1.39111	2.62281	down
Il4ra	1.55533	0.63722	1.55533	down
Ypel3	2.34023	1.22665	2.34023	down
Tbx6	3.21977	1.68696	3.21977	down
Sez6l2	2.39106	1.25765	2.39106	down
Prrt2	1.71581	0.778886	1.71581	down
9130019O22Rik	1.51476	0.599091	1.51476	down
Zfp629	2.03428	1.02451	2.03428	down
Tgfb1i1	1.78272	0.834077	1.78272	down
Rgs10	3.77539	1.91662	3.77539	down
Inpp5f	1.79139	0.841078	1.79139	down
Btbd16	1.53983	0.622776	1.53983	down
Plekha1	2.00754	1.00543	2.00754	down
Acadsb	1.5595	0.641083	1.5595	down
Mgmt	1.92957	0.948282	1.92957	down
Mapk1ip1	1.61391	0.690558	1.61391	down
Bnip3	2.98411	1.5773	2.98411	down
Adam8	1.94976	0.963293	1.94976	down
B4galnt4	14.7794	3.88551	14.7794	down
1600016N20Rik	1.82406	0.86715	1.82406	down
Tnfrsf26	3.99277	1.99739	3.99277	down
Tnfrsf22	1.64539	0.718429	1.64539	down
Tnfrsf23	2.9074	1.53973	2.9074	down
Insr	2.47289	1.3062	2.47289	down
Zfp358	1.98336	0.987945	1.98336	down
Cd209c	1.55275	0.634828	1.55275	down
Evi5l	2.34938	1.23228	2.34938	down
Efnb2	1.62997	0.704843	1.62997	down
Irs2	1.92012	0.941193	1.92012	down
Lamp1	1.67139	0.741048	1.67139	down
Grk1	1.62012	0.696097	1.62012	down
2610019F03Rik	2.19464	1.13399	2.19464	down
Kbtbd11	1.60168	0.679587	1.60168	down
AC148089.1	1.71712	0.779991	1.71712	down
Ap3m2	1.71567	0.778776	1.71567	down
Rnf122	2.22597	1.15444	2.22597	down
Tmem66	1.54685	0.629335	1.54685	down
AC163097.1	1.52224	0.606199	1.52224	down
Ddx60	1.82512	0.867992	1.82512	down
Sc4mol	1.5473	0.629755	1.5473	down
Gm10660	1.64569	0.718691	1.64569	down
D130040H23Rik	1.66655	0.736863	1.66655	down
Zfp963	1.88801	0.916868	1.88801	down
Zfp866	1.51146	0.595941	1.51146	down
Slc25a42	1.72862	0.789619	1.72862	down
Use1	1.50857	0.593182	1.50857	down
Slc27a1	1.64617	0.71911	1.64617	down
Unc13a	1.64394	0.717155	1.64394	down
Klf2	1.57372	0.654181	1.57372	down
Inpp4b	2.43983	1.28678	2.43983	down
Palm3	2.75652	1.46285	2.75652	down
Il27ra	1.67232	0.74185	1.67232	down
Podnl1	2.66077	1.41185	2.66077	down
Zswim4	3.03995	1.60405	3.03995	down
Nfix	1.86444	0.898742	1.86444	down
Siah1a	1.5156	0.599889	1.5156	down
Chd9	1.85489	0.891333	1.85489	down
Ccdc102a	2.4778	1.30906	2.4778	down
Gpr114	3.44994	1.78657	3.44994	down
Zfp319	1.6629	0.733698	1.6629	down
Ces2c	7.09765	2.82734	7.09765	down
Elmo3	2.12112	1.08483	2.12112	down
Zdhhc1	1.96669	0.975769	1.96669	down
Ranbp10	1.59926	0.677402	1.59926	down
Dus2l	2.03171	1.0227	2.03171	down
Ddx28	1.64387	0.717098	1.64387	down
AC134615.1	1.5827	0.662389	1.5827	down
Nfat5	1.65939	0.730651	1.65939	down
St3gal2	1.52387	0.60774	1.52387	down
Znrf1	1.92964	0.948334	1.92964	down
Zfp1	1.80333	0.850664	1.80333	down
Maf	795.337	9.63542	795.337	down
Hsdl1	1.64031	0.713966	1.64031	down
Dnaaf1	1.5152	0.599506	1.5152	down
Cpne7	8.53278	3.09302	8.53278	down
Rab4a	1.85026	0.887725	1.85026	down
Irf2bp2	2.24358	1.1658	2.24358	down
Mmp12	1.85793	0.893698	1.85793	down
Sesn3	2.78731	1.47888	2.78731	down
Gpr83	2.44468	1.28965	2.44468	down
Folr4	2.02857	1.02046	2.02857	down
BC017612	3.06355	1.6152	3.06355	down
Fbxl12	1.583	0.662665	1.583	down
A230050P20Rik	1.71281	0.776365	1.71281	down
Angptl6	1.56561	0.646728	1.56561	down
S1pr2	1.65685	0.728441	1.65685	down
AB124611	1.57125	0.651913	1.57125	down
Ldlr	2.78822	1.47935	2.78822	down
Dock6	1.68149	0.749738	1.68149	down
Slc37a2	2.9102	1.54112	2.9102	down
Vwa5a	3.8212	1.93402	3.8212	down
Cxcr5	6.67934	2.7397	6.67934	down
Zbtb16	6.81356	2.76841	6.81356	down
Usp28	1.57637	0.656605	1.57637	down
Pou2af1	14.9208	3.89925	14.9208	down
Gm16124	2.031	1.02219	2.031	down
Dnaja4	1.73579	0.795591	1.73579	down
C230081A13Rik	1.7153	0.778461	1.7153	down
Snx33	1.57232	0.652891	1.57232	down
Neil1	1.62904	0.704026	1.62904	down
Hexa	1.94268	0.958047	1.94268	down
Parp6	1.66267	0.733505	1.66267	down
Senp8	1.63521	0.70948	1.63521	down
Myo9a	1.50746	0.592117	1.50746	down
Coro2b	317.407	8.31019	317.407	down
Parp16	1.52799	0.611635	1.52799	down
Fbxl22	1.72753	0.788715	1.72753	down
Vps13c	1.78464	0.835632	1.78464	down
Aqp9	3.17722	1.66776	3.17722	down
BC031353	1.92155	0.942269	1.92155	down
7SK	2.00704	1.00507	2.00704	down
AC159313.1	2.07941	1.05617	2.07941	down
Slc17a5	2.10329	1.07265	2.10329	down
Myo6	3.66926	1.87549	3.66926	down
Sh3bgrl2	2.25306	1.17188	2.25306	down
Bckdhb	1.61882	0.694941	1.61882	down
Dopey1	1.64749	0.720272	1.64749	down
Nt5e	7.18715	2.84542	7.18715	down
Zfp949	1.58963	0.668689	1.58963	down
Slc9a9	3.55191	1.8286	3.55191	down
BC043934	1.63861	0.712474	1.63861	down
AC121121.1	1.7411	0.799997	1.7411	down
Slc25a36	1.50128	0.58619	1.50128	down
Gm16185	1.62126	0.697111	1.62126	down
Rab6b	2.12575	1.08797	2.12575	down
Nphp3	2.0314	1.02248	2.0314	down
Acpp	2.28121	1.1898	2.28121	down
Abhd14b	2.07033	1.04986	2.07033	down
Parp3	2.02755	1.01974	2.02755	down
Rnf123	1.72021	0.782581	1.72021	down
Dag1	1.50468	0.589457	1.50468	down
1700102P08Rik	2.15568	1.10814	2.15568	down
Pfkfb4	3.115	1.63923	3.115	down
Plxnb1	1.56998	0.650742	1.56998	down
Tmie	2.40147	1.26392	2.40147	down
Als2cl	2.55558	1.35365	2.55558	down
Gm9846	1.58184	0.661599	1.58184	down
Itga9	1.65003	0.722493	1.65003	down
Vill	2.26349	1.17855	2.26349	down
Vipr1	3.00564	1.58767	3.00564	down
Tmem42	2.1889	1.1302	2.1889	down
Ccr2	4.37394	2.12893	4.37394	down
Syne1	1.80223	0.849785	1.80223	down
Ipcef1	1.84221	0.881436	1.84221	down
Cnksr3	2.30282	1.2034	2.30282	down
Utrn	2.1205	1.0844	2.1205	down
Plagl1	3.53705	1.82255	3.53705	down
Phactr2	2.95774	1.56449	2.95774	down
Hivep2	1.96863	0.977195	1.96863	down
Txlnb	3.86384	1.95004	3.86384	down
Ccdc28a	1.6908	0.757709	1.6908	down
Nhsl1	4.8758	2.28564	4.8758	down
Map3k5	1.55771	0.639427	1.55771	down
Mtap7	2.82182	1.49663	2.82182	down
Myb	1.5394	0.622364	1.5394	down
AC153556.1	1.64119	0.714745	1.64119	down
E030030I06Rik	1.567	0.648001	1.567	down
RP23-58L22.8	3.1257	1.64418	3.1257	down
L3mbtl3	1.52029	0.604349	1.52029	down
Fam26f	2.14734	1.10255	2.14734	down
Dse	3.20014	1.67814	3.20014	down
Marcks	2.20856	1.1431	2.20856	down
Gm16364	1.90458	0.92947	1.90458	down
Sesn1	2.17322	1.11983	2.17322	down
Scml4	2.18246	1.12596	2.18246	down
Pkib	1.51282	0.597236	1.51282	down
Smpdl3a	2.54034	1.34502	2.54034	down
P4ha1	1.58059	0.660467	1.58059	down
Ddit4	4.49683	2.16891	4.49683	down
Spock2	3.53025	1.81977	3.53025	down
Cdh23	11.1786	3.48267	11.1786	down
4632428N05Rik	1.9048	0.92964	1.9048	down
Srgn	1.58686	0.666175	1.58686	down
Zfp365	1.71374	0.777152	1.71374	down
Arid5b	2.0438	1.03125	2.0438	down
Ipmk	2.11852	1.08306	2.11852	down
Ggt5	2.77487	1.47242	2.77487	down
Gm5134	1.50013	0.585092	1.50013	down
Prmt2	1.66725	0.737474	1.66725	down
Pcbp3	1.88325	0.913224	1.88325	down
Gm9978	2.06642	1.04714	2.06642	down
2610008E11Rik	1.79502	0.844003	1.79502	down
Dos	2.29289	1.19717	2.29289	down
Izumo4	1.66548	0.735937	1.66548	down
Gadd45b	1.62128	0.697135	1.62128	down
Atcay	1.72777	0.788911	1.72777	down
Zfr2	4.76062	2.25115	4.76062	down
Matk	5.93973	2.5704	5.93973	down
Tjp3	1.84927	0.886956	1.84927	down
Ankrd24	1.57109	0.651763	1.57109	down
Ckap4	2.5849	1.37011	2.5849	down
Tcp11l2	3.23771	1.69497	3.23771	down
Btbd11	1.928	0.947103	1.928	down
Nt5dc3	1.52673	0.610448	1.52673	down
Gm872	1.50848	0.593098	1.50848	down
Eea1	1.6956	0.761799	1.6956	down
Btg1	2.00598	1.00431	2.00598	down
Kcnmb4	1.90085	0.926641	1.90085	down
5330438D12Rik	1.73705	0.796637	1.73705	down
Irak3	2.3301	1.22039	2.3301	down
Tbc1d30	2.15537	1.10794	2.15537	down
Gns	1.56908	0.649919	1.56908	down
Ctdsp2	1.51413	0.598492	1.51413	down
2009-03-01	1.64202	0.715475	1.64202	down
Dtx3	1.52737	0.611051	1.52737	down
Rdh1	1.53321	0.616554	1.53321	down
Rdh16	1.59018	0.669188	1.59018	down
Stat2	1.66434	0.73495	1.66434	down
Rdh5	1.56615	0.647225	1.56615	down
Bloc1s1	1.66775	0.7379	1.66775	down
Itga7	2.42506	1.27802	2.42506	down
Tespa1	3.99035	1.99652	3.99035	down
Pisd-ps1	1.67011	0.739941	1.67011	down
Sfi1	1.68222	0.750364	1.68222	down
Pik3ip1	2.38302	1.25279	2.38302	down
Tcn2	3.00018	1.58505	3.00018	down
Ccdc157	1.68126	0.749546	1.68126	down
Lif	6.25791	2.64568	6.25791	down
Kremen1	1.55236	0.634459	1.55236	down
Znrf3	1.91052	0.933964	1.91052	down
Nacad	1.60451	0.682132	1.60451	down
Ramp3	1.79537	0.844284	1.79537	down
4930512M02Rik	1.541	0.623868	1.541	down
Ehbp1	1.74376	0.802199	1.74376	down
Zrsr1	1.5324	0.615796	1.5324	down
Nsg2	4.66796	2.22279	4.66796	down
A230004M16Rik	1.63466	0.708994	1.63466	down
Tgtp1	1.69902	0.764702	1.69902	down
Tgtp2	1.74392	0.802336	1.74392	down
Rnf130	1.57969	0.659643	1.57969	down
Grm6	2.66525	1.41427	2.66525	down
AL935177.3	2.87125	1.52168	2.87125	down
Tcf7	4.48898	2.16639	4.48898	down
A630014C17Rik	2.57214	1.36297	2.57214	down
Aff4	1.54828	0.630667	1.54828	down
Il4	35.7077	5.15816	35.7077	down
Gm17334	1.68626	0.753827	1.68626	down
Pdlim4	3.49614	1.80576	3.49614	down
P4ha2	2.33895	1.22586	2.33895	down
Rapgef6	1.62883	0.703834	1.62883	down
Igtp	1.51403	0.59839	1.51403	down
Irgm2	1.90462	0.929507	1.90462	down
2810021J22Rik	1.63392	0.708336	1.63392	down
Flcn	1.51447	0.598812	1.51447	down
Tom1l2	1.99817	0.998681	1.99817	down
Tnfrsf13b	1.64209	0.715535	1.64209	down
Fam83g	2.96323	1.56717	2.96323	down
Specc1	3.58196	1.84075	3.58196	down
2410006H16Rik	1.60367	0.681381	1.60367	down
Ntn1	6.42618	2.68396	6.42618	down
Cd68	1.56708	0.648081	1.56708	down
Zbtb4	2.40054	1.26336	2.40054	down
Dlg4	1.68138	0.749642	1.68138	down
0610010K14Rik	1.58053	0.660408	1.58053	down
Rnf167	1.86837	0.901783	1.86837	down
Camkk1	2.42154	1.27592	2.42154	down
Serpinf1	2.13495	1.09421	2.13495	down
Mir22hg	1.88711	0.916176	1.88711	down
Slc43a2	1.51924	0.603352	1.51924	down
Fam101b	3.30254	1.72357	3.30254	down
Ssh2	2.63597	1.39833	2.63597	down
Aldoc	5.02323	2.32862	5.02323	down
Cdk5r1	3.03092	1.59975	3.03092	down
Myo1d	1.5731	0.65361	1.5731	down
Slfn5	3.87845	1.95548	3.87845	down
Slfn1	1.61544	0.691928	1.61544	down
Usp32	1.56356	0.644833	1.56356	down
Ypel2	2.17073	1.11818	2.17073	down
A430104N18Rik	2.21096	1.14467	2.21096	down
Cuedc1	1.70584	0.770478	1.70584	down
Msi2	2.03816	1.02727	2.03816	down
Mmd	1.76403	0.818874	1.76403	down
Pdk2	1.93891	0.955247	1.93891	down
Abi3	1.52785	0.611503	1.52785	down
Gngt2	1.50359	0.588413	1.50359	down
Gm11532	1.72649	0.787843	1.72649	down
Arl5c	2.01956	1.01404	2.01956	down
Cacnb1	2.10538	1.07408	2.10538	down
Fbxl20	2.19157	1.13197	2.19157	down
Gm11632	2.35841	1.23781	2.35841	down
Thra	1.79523	0.844173	1.79523	down
Igfbp4	2.77221	1.47104	2.77221	down
Ccr7	1.94349	0.958647	1.94349	down
Jup	1.88345	0.913375	1.88345	down
Atp6v0a1	2.93857	1.55511	2.93857	down
Ezh1	1.77225	0.825582	1.77225	down
Tmem106a	1.91305	0.935876	1.91305	down
Rundc3a	2.96532	1.56819	2.96532	down
Grn	3.13869	1.65016	3.13869	down
Map3k14	1.68648	0.754011	1.68648	down
Pecam1	2.10055	1.07077	2.10055	down
Gm11707	2.73653	1.45235	2.73653	down
Pitpnc1	1.63508	0.709365	1.63508	down
Gm11714	1.73091	0.791527	1.73091	down
Axin2	1.54063	0.623517	1.54063	down
Gm11696	2.1177	1.0825	2.1177	down
Arsg	2.00639	1.0046	2.00639	down
Fam20a	1.80976	0.855796	1.80976	down
Ttyh2	2.97058	1.57074	2.97058	down
Rab37	2.16201	1.11237	2.16201	down
Gm11695	5.49359	2.45775	5.49359	down
Slc16a5	6.29667	2.65459	6.29667	down
Rnf157	2.16014	1.11112	2.16014	down
Sec14l1	1.68524	0.752955	1.68524	down
Tha1	1.70517	0.769919	1.70517	down
Dnahc17	1.88795	0.916824	1.88795	down
Cyth1	1.55837	0.640037	1.55837	down
Timp2	4.91589	2.29745	4.91589	down
Card14	2.7002	1.43307	2.7002	down
Sgsh	2.24208	1.16484	2.24208	down
Slc26a11	8.57949	3.10089	8.57949	down
Rnf213	2.02681	1.01921	2.02681	down
Mafg	2.21163	1.14511	2.21163	down
Narf	1.72677	0.788075	1.72677	down
Metrnl	1.68963	0.756705	1.68963	down
Mfsd2b	2.15273	1.10617	2.15273	down
Rhob	1.99213	0.99431	1.99213	down
Fam84a	2.88616	1.52915	2.88616	down
Hpcal1	1.83607	0.876622	1.83607	down
Gm10480	1.59004	0.66906	1.59004	down
Asap2	1.57293	0.653455	1.57293	down
Grhl1	4.61432	2.20612	4.61432	down
Rnf144a	2.93101	1.5514	2.93101	down
Rsad2	2.17494	1.12098	2.17494	down
Hbp1	1.68891	0.756093	1.68891	down
CT572998.1	2.06452	1.0458	2.06452	down
Ahr	2.21286	1.14591	2.21286	down
Tspan13	1.74565	0.803766	1.74565	down
Bzw2	1.59856	0.676771	1.59856	down
Sostdc1	11.0698	3.46856	11.0698	down
Dock4	4.55279	2.18675	4.55279	down
AC157213.1	1.67554	0.744626	1.67554	down
Arhgap5	2.18524	1.12779	2.18524	down
Egln3	1.85417	0.890774	1.85417	down
2700097O09Rik	1.68778	0.755131	1.68778	down
3110056K07Rik	1.55112	0.633314	1.55112	down
Daam1	2.20643	1.14171	2.20643	down
Spnb1	5.54222	2.47046	5.54222	down
Rdh12	1.73864	0.797959	1.73864	down
Zfp36l1	1.57731	0.657464	1.57731	down
AC108401.1	1.63704	0.711087	1.63704	down
AC108401.2	2.22639	1.15471	2.22639	down
Map3k9	1.78715	0.83766	1.78715	down
C130039O16Rik	2.2476	1.16839	2.2476	down
Aldh6a1	1.79241	0.841902	1.79241	down
Fos	1.73048	0.791174	1.73048	down
Tgfb3	15.1749	3.92361	15.1749	down
2310044G17Rik	1.60733	0.684668	1.60733	down
Ston2	1.7944	0.843502	1.7944	down
Eml5	1.88935	0.917889	1.88935	down
Lgmn	3.26823	1.70851	3.26823	down
RP23-377G8.3	2.33841	1.22553	2.33841	down
Asb2	3.59402	1.8456	3.59402	down
Otub2	1.59176	0.67062	1.59176	down
Serpina3f	1.72451	0.78619	1.72451	down
Vrk1	1.54629	0.628808	1.54629	down
Evl	2.95793	1.56459	2.95793	down
Degs2	3.33132	1.73609	3.33132	down
Begain	2.39295	1.25879	2.39295	down
Ckb	1.58452	0.664046	1.58452	down
Ppp1r13b	1.69384	0.760298	1.69384	down
Pld4	1.54195	0.62476	1.54195	down
Jag2	1.92551	0.945243	1.92551	down
Ighg1	10.5382	3.39755	10.5382	down
Ighm	1.88449	0.914174	1.88449	down
Dnahc11	12.6955	3.66624	12.6955	down
Itgb8	7.34804	2.87736	7.34804	down
Asb13	1.95375	0.966245	1.95375	down
Gpr137b	1.61183	0.688696	1.61183	down
Tcrg-C2	2.9227	1.5473	2.9227	down
Zscan12	1.75347	0.810212	1.75347	down
Zfp187	1.51493	0.599247	1.51493	down
Prl8a1	1.52925	0.612825	1.52925	down
Tubb2a	2.25795	1.17501	2.25795	down
Rreb1	2.35594	1.2363	2.35594	down
Dsp	1.66726	0.73748	1.66726	down
BC024659	1.57291	0.65344	1.57291	down
Ccdc90a	1.79057	0.840417	1.79057	down
Cd83	10.6327	3.41043	10.6327	down
Jarid2	1.66439	0.734992	1.66439	down
Mylip	2.11988	1.08398	2.11988	down
C78339	1.50263	0.587493	1.50263	down
Kif13a	2.94618	1.55885	2.94618	down
Zfp169	1.83374	0.874787	1.83374	down
Syk	2.3007	1.20207	2.3007	down
Unc5a	2.10941	1.07684	2.10941	down
Dapk1	2.08082	1.05715	2.08082	down
Ctsl	2.68775	1.4264	2.68775	down
Zfp369	1.58455	0.66407	1.58455	down
Zfp708	2.41406	1.27146	2.41406	down
Zfp459	1.76956	0.823387	1.76956	down
Zfp874a	1.71676	0.77969	1.71676	down
Zfp874b	1.74161	0.800424	1.74161	down
Tert	1.80301	0.850408	1.80301	down
Slc12a7	1.60325	0.680995	1.60325	down
Tppp	3.7748	1.9164	3.7748	down
Arrdc3	1.81539	0.860281	1.81539	down
Rasa1	1.69841	0.764184	1.69841	down
Ssbp2	1.94328	0.958494	1.94328	down
Rasgrf2	1.53484	0.618084	1.53484	down
Serinc5	3.45913	1.79041	3.45913	down
Jmy	2.29401	1.19787	2.29401	down
Scamp1	1.52829	0.611919	1.52829	down
Wdr41	1.50564	0.590378	1.50564	down
F2rl1	2.8917	1.53192	2.8917	down
F2rl2	2.93852	1.55509	2.93852	down
Enc1	2.15127	1.10519	2.15127	down
Fcho2	1.69694	0.762933	1.69694	down
AC132347.1	2.15658	1.10875	2.15658	down
Mccc2	1.5643	0.645516	1.5643	down
Ccdc125	2.16118	1.11182	2.16118	down
Mast4	2.20819	1.14287	2.20819	down
Sgtb	2.90801	1.54003	2.90801	down
Adamts6	1.55724	0.638989	1.55724	down
Zswim6	2.49363	1.31825	2.49363	down
Il6st	2.28993	1.1953	2.28993	down
Parp8	2.92224	1.54707	2.92224	down
Emb	1.83065	0.872359	1.83065	down
Gm9752	1.5239	0.607772	1.5239	down
Gm3636	1.95572	0.967699	1.95572	down
Dnase1l3	8.60001	3.10434	8.60001	down
Abhd6	1.82969	0.871601	1.82969	down
Kctd6	1.98088	0.986141	1.98088	down
Nr1d2	2.29042	1.19561	2.29042	down
Usp54	1.87485	0.906775	1.87485	down
Myst4	1.58533	0.66478	1.58533	down
Il17rb	1.62205	0.697823	1.62205	down
Cacna1d	3.43186	1.77899	3.43186	down
Nisch	1.5926	0.671382	1.5926	down
Sh3bp5	2.07319	1.05185	2.07319	down
Colq	1.59015	0.66916	1.59015	down
Wdfy4	2.31456	1.21074	2.31456	down
Gm8113	2.39078	1.25748	2.39078	down
4930431P03Rik	2.51253	1.32914	2.51253	down
Ptger2	2.34634	1.23041	2.34634	down
Gch1	1.72175	0.783873	1.72175	down
Rnase4	51.5989	5.68927	51.5989	down
Rpgrip1	2.13905	1.09697	2.13905	down
AC163653.3	3.03371	1.60108	3.03371	down
Trav6n-6	1.81594	0.860718	1.81594	down
Trav14n-3	1.57973	0.659675	1.57973	down
AC161872.5	1.71514	0.778324	1.71514	down
Trav14-2	1.75212	0.809106	1.75212	down
Trav8-2	1.65928	0.730554	1.65928	down
Abhd4	1.51965	0.603738	1.51965	down
Zfhx2	1.84494	0.883576	1.84494	down
Rec8	1.64018	0.713853	1.64018	down
AC154731.1	1.57922	0.659214	1.57922	down
Zmym5	1.7403	0.79934	1.7403	down
Lats2	1.81502	0.859986	1.81502	down
Trim13	1.98084	0.986111	1.98084	down
Wdfy2	4.01538	2.00554	4.01538	down
Neil2	2.7128	1.43978	2.7128	down
Zfp395	1.63882	0.712657	1.63882	down
Bnip3l	1.54819	0.63058	1.54819	down
Rhobtb2	1.67654	0.745487	1.67654	down
Egr3	1.73814	0.79754	1.73814	down
Lpar6	1.90689	0.931224	1.90689	down
Tsc22d1	1.91629	0.938314	1.91629	down
Lacc1	3.67102	1.87618	3.67102	down
Tnfsf11	2.65927	1.41103	2.65927	down
Tbc1d4	12.6479	3.66082	12.6479	down
AC102815.1	6.43088	2.68502	6.43088	down
Kctd12	6.41928	2.68241	6.41928	down
4921525B02Rik	1.61644	0.692822	1.61644	down
Dzip1	2.29167	1.1964	2.29167	down
Mbnl2	1.84691	0.885112	1.84691	down
Gpr183	1.61393	0.690577	1.61393	down
Sepp1	4.23523	2.08244	4.23523	down
AW549877	1.6775	0.746315	1.6775	down
Gm16077	2.29886	1.20092	2.29886	down
Card6	2.102	1.07176	2.102	down
Gm2245	1.66884	0.738849	1.66884	down
Rictor	1.63505	0.709334	1.63505	down
Il7r	2.31138	1.20875	2.31138	down
Spef2	1.56588	0.64697	1.56588	down
Pdzd2	1.57599	0.656259	1.57599	down
Basp1	1.58904	0.668158	1.58904	down
Myo10	2.49285	1.31779	2.49285	down
Fam134b	1.94729	0.961471	1.94729	down
Trio	2.80617	1.4886	2.80617	down
Pgcp	3.10525	1.63471	3.10525	down
Laptm4b	3.37248	1.75381	3.37248	down
Matn2	77.8039	6.28177	77.8039	down
Rnf19a	1.76421	0.819021	1.76421	down
Ankrd46	1.56684	0.647857	1.56684	down
Ext1	2.76414	1.46683	2.76414	down
Sntb1	2.59605	1.37632	2.59605	down
Zhx2	1.79769	0.846141	1.79769	down
Fbxo32	1.99749	0.998185	1.99749	down
Asap1	1.58303	0.662692	1.58303	down
Col22a1	1.82311	0.8664	1.82311	down
Ptk2	3.8406	1.94133	3.8406	down
Slc45a4	1.84301	0.882065	1.84301	down
Arc	2.06459	1.04586	2.06459	down
Zfp623	1.57122	0.651889	1.57122	down
Adck5	2.03052	1.02185	2.03052	down
Kifc2	1.99782	0.998429	1.99782	down
Arhgap39	1.61229	0.689113	1.61229	down
1700088E04Rik	1.66487	0.735408	1.66487	down
Gm10863	1.55225	0.634362	1.55225	down
Pla2g6	1.60562	0.683131	1.60562	down
Maff	1.50776	0.592403	1.50776	down
Cbx7	1.67429	0.743549	1.67429	down
Tnrc6b	1.65918	0.73047	1.65918	down
Tef	1.5736	0.654068	1.5736	down
Tob2	1.64153	0.715045	1.64153	down
Cyp2d22	2.31567	1.21143	2.31567	down
5031439G07Rik	1.55819	0.639871	1.55819	down
Fbln1	1.94046	0.956399	1.94046	down
Ttc38	1.60656	0.683973	1.60656	down
Cerk	1.69428	0.760676	1.69428	down
Hdac10	1.52459	0.60842	1.52459	down
Mapk11	2.19094	1.13155	2.19094	down
Fam116b	1.74285	0.801452	1.74285	down
Arsa	1.5555	0.637379	1.5555	down
Cntn1	1.55859	0.640237	1.55859	down
Prickle1	2.11616	1.08145	2.11616	down
Amigo2	2.19444	1.13385	2.19444	down
Adcy6	2.26344	1.17852	2.26344	down
Mll2	1.89527	0.922405	1.89527	down
Prpf40b	1.73665	0.796309	1.73665	down
Nckap5l	2.66953	1.41659	2.66953	down
Dip2b	1.79159	0.841239	1.79159	down
Slc11a2	1.90758	0.931746	1.90758	down
Pou6f1	2.26507	1.17955	2.26507	down
Gm20680	1.87214	0.90469	1.87214	down
Galnt6	1.91125	0.934519	1.91125	down
1810009N23Rik	2.63609	1.3984	2.63609	down
Acvrl1	2.82481	1.49815	2.82481	down
Acvr1b	2.14679	1.10218	2.14679	down
Calcoco1	3.07251	1.61942	3.07251	down
Itga5	1.73354	0.79372	1.73354	down
Pde1b	2.26592	1.1801	2.26592	down
Vasn	2.1124	1.07888	2.1124	down
Mgrn1	2.63114	1.39569	2.63114	down
Ciita	2.00989	1.00712	2.00989	down
Snn	4.60129	2.20204	4.60129	down
AC163630.1	1.70227	0.76746	1.70227	down
Fgd4	1.55465	0.636593	1.55465	down
Tmem191c	1.79783	0.846254	1.79783	down
Car15	1.89382	0.921297	1.89382	down
Klhl6	1.64619	0.719134	1.64619	down
Klhl24	2.4312	1.28167	2.4312	down
Abcc5	2.99175	1.58099	2.99175	down
Fam131a	1.64299	0.716326	1.64299	down
Clcn2	2.05133	1.03656	2.05133	down
B630019A10Rik	3.62649	1.85857	3.62649	down
BC106179	2.1322	1.09234	2.1322	down
St6gal1	3.93164	1.97513	3.93164	down
Rtp4	1.92008	0.941167	1.92008	down
Bcl6	4.26345	2.09202	4.26345	down
Lpp	3.96608	1.98771	3.96608	down
Fam43a	10.6632	3.41457	10.6632	down
Dirc2	3.08391	1.62476	3.08391	down
Hspbap1	1.5154	0.599702	1.5154	down
Zbtb20	3.06135	1.61417	3.06135	down
Zbtb20	4.02106	2.00758	4.02106	down
Tigit	1.91641	0.938409	1.91641	down
Zdhhc23	1.55559	0.637458	1.55559	down
Cd200r3	1.91336	0.936107	1.91336	down
Btla	2.04698	1.0335	2.04698	down
Trat1	2.59944	1.3782	2.59944	down
Cep97	1.59731	0.675645	1.59731	down
Impg2	2.85382	1.51289	2.85382	down
Filip1l	1.82486	0.867789	1.82486	down
Pros1	2.37455	1.24766	2.37455	down
Gm20469	1.55371	0.635713	1.55371	down
Samsn1	1.5806	0.660469	1.5806	down
Nrip1	1.61165	0.688542	1.61165	down
AC122837.1	1.61163	0.688517	1.61163	down
App	1.6001	0.67816	1.6001	down
Bach1	1.50349	0.588311	1.50349	down
Tiam1	1.54597	0.62851	1.54597	down
Gm15965	1.50926	0.593842	1.50926	down
Gcfc1	1.53171	0.615142	1.53171	down
Ifnar2	2.14181	1.09883	2.14181	down
RP23-190G10.4	1.54132	0.624167	1.54132	down
A930006K02Rik	1.6241	0.699641	1.6241	down
Ifngr2	2.09524	1.06712	2.09524	down
Slc5a3	2.57034	1.36196	2.57034	down
Setd4	1.88974	0.918187	1.88974	down
Cbr1	1.61766	0.693911	1.61766	down
Ttc3	1.55424	0.636205	1.55424	down
AC171211.1	1.60895	0.686117	1.60895	down
Gm15340	3.31218	1.72778	3.31218	down
Brwd1	1.59414	0.672778	1.59414	down
Mx1	1.62079	0.696693	1.62079	down
Mx2	2.01911	1.01372	2.01911	down
Prdm15	1.70457	0.769404	1.70457	down
Zdhhc14	2.75768	1.46346	2.75768	down
Synj2	2.08234	1.0582	2.08234	down
Tmem181b-ps	1.65236	0.724532	1.65236	down
Rps6ka2	2.40925	1.26858	2.40925	down
Prdm9	1.94176	0.957365	1.94176	down
Rgmb	2.76933	1.46954	2.76933	down
Zfp97	1.5249	0.608717	1.5249	down
Zfp53	1.58043	0.660319	1.58043	down
Zscan10	2.56261	1.35761	2.56261	down
Tnfrsf12a	1.87021	0.903197	1.87021	down
Abca3	2.52115	1.33408	2.52115	down
D330041H03Rik	1.58816	0.667352	1.58816	down
Dnase1l2	1.78664	0.837248	1.78664	down
Pkd1	1.88706	0.916141	1.88706	down
Rab11fip3	1.71388	0.777264	1.71388	down
Decr2	1.51403	0.598394	1.51403	down
Nme4	2.06671	1.04733	2.06671	down
Rgs11	3.20026	1.67819	3.20026	down
Itfg3	1.64295	0.716288	1.64295	down
Dusp1	1.85241	0.889401	1.85241	down
A930001N09Rik	1.99595	0.997073	1.99595	down
Phf1	1.7749	0.827736	1.7749	down
Pacsin1	2.79265	1.48163	2.79265	down
Zfp523	1.66556	0.736007	1.66556	down
Cpne5	1.51068	0.595199	1.51068	down
Dnahc8	1.93894	0.955269	1.93894	down
Akap8l	1.79907	0.847251	1.79907	down
Rasal3	1.51428	0.598636	1.51428	down
Cyp4f16	1.66214	0.733043	1.66214	down
Zfp871	1.60244	0.680269	1.60244	down
Zfp799	1.6453	0.718352	1.6453	down
Cyp4f13	1.78483	0.83579	1.78483	down
H2-K2	1.75991	0.815502	1.75991	down
H2-Ke6	1.73616	0.795896	1.73616	down
Col11a2	1.79861	0.846885	1.79861	down
H2-Oa	2.13772	1.09607	2.13772	down
H2-DMb2	2.38165	1.25196	2.38165	down
H2-Ob	3.12416	1.64347	3.12416	down
H2-Aa	1.6847	0.752491	1.6847	down
H2-Eb1	1.95172	0.964748	1.95172	down
Btnl7	2.58819	1.37195	2.58819	down
Ager	2.41678	1.27309	2.41678	down
Prrt1	1.70179	0.767051	1.70179	down
Zbtb12	1.5924	0.671207	1.5924	down
Lta	1.77001	0.823755	1.77001	down
H2-Q2	19.2581	4.26739	19.2581	down
Ddr1	3.45337	1.788	3.45337	down
Gm17414	1.65949	0.730736	1.65949	down
Gabbr1	2.14557	1.10136	2.14557	down
Cd2ap	1.93608	0.953137	1.93608	down
Slc25a27	2.64516	1.40336	2.64516	down
Cyp39a1	3.25012	1.70049	3.25012	down
Enpp5	1.62666	0.701916	1.62666	down
Tmem63b	1.94127	0.956998	1.94127	down
Abcc10	1.60288	0.680666	1.60288	down
Zfp318	1.67782	0.74659	1.67782	down
Cul9	2.08747	1.06176	2.08747	down
Klc4	2.22581	1.15433	2.22581	down
Cul7	1.59469	0.673274	1.59469	down
Guca1b	1.83045	0.872201	1.83045	down
Treml2	2.75339	1.46121	2.75339	down
B430306N03Rik	2.43646	1.28479	2.43646	down
Zfp119a	1.51789	0.602071	1.51789	down
Kdm4b	1.80124	0.848994	1.80124	down
Tnfsf14	1.91687	0.938755	1.91687	down
Ankrd12	2.34323	1.2285	2.34323	down
Ehd3	1.58031	0.660212	1.58031	down
Crim1	1.82336	0.866601	1.82336	down
Fez2	1.55896	0.640586	1.55896	down
Qpct	1.51987	0.603943	1.51987	down
Map4k3	2.05707	1.04059	2.05707	down
Thada	1.52799	0.611639	1.52799	down
G430049J08RIK	1.9502	0.963621	1.9502	down
Bambi	1.57147	0.652114	1.57147	down
Ttc39c	1.65156	0.72383	1.65156	down
Taf4b	1.55611	0.637941	1.55611	down
Apc	1.94247	0.957889	1.94247	down
Cxxc5	3.1571	1.6586	3.1571	down
Psd2	1.79005	0.839997	1.79005	down
Rell2	1.84825	0.886161	1.84825	down
Tnfaip8	2.02867	1.02053	2.02867	down
Snx2	3.58579	1.84229	3.58579	down
4930511M06Rik	1.512	0.59646	1.512	down
Gm4951	1.66115	0.732178	1.66115	down
Gm4841	1.57414	0.654566	1.57414	down
F830016B08Rik	1.96743	0.976315	1.96743	down
Iigp1	1.88927	0.917828	1.88927	down
Synpo	3.51759	1.81459	3.51759	down
Ppargc1b	2.03143	1.0225	2.03143	down
Malt1	2.13416	1.09367	2.13416	down
D18Ertd653e	3.31987	1.73113	3.31987	down
Slc14a1	2.14079	1.09814	2.14079	down
Pard6g	2.88871	1.53043	2.88871	down
Nfatc1	1.6397	0.713429	1.6397	down
Atp9b	1.71917	0.781713	1.71917	down
Zfp516	1.93826	0.954766	1.93826	down
Doc2g	2.32898	1.2197	2.32898	down
Pitpnm1	1.50869	0.593294	1.50869	down
Carns1	1.89572	0.922742	1.89572	down
AC109138.2	1.82138	0.865033	1.82138	down
Pold4	1.77791	0.830186	1.77791	down
Ccs	1.62933	0.704278	1.62933	down
Npas4	2.56832	1.36083	2.56832	down
Malat1	2.75736	1.46329	2.75736	down
Neat1	2.17034	1.11792	2.17034	down
Slc25a45	1.51506	0.599375	1.51506	down
Macrod1	1.87132	0.904059	1.87132	down
Mpeg1	1.9227	0.943133	1.9227	down
Vps13a	1.54016	0.623078	1.54016	down
Trpm6	6.00346	2.58579	6.00346	down
Tmem2	1.57635	0.656587	1.57635	down
Glis3	3.11711	1.64021	3.11711	down
Acta2	1.71538	0.778528	1.71538	down
Fas	2.38564	1.25438	2.38564	down
Lipa	1.68838	0.755638	1.68838	down
Ifit3	1.60175	0.679647	1.60175	down
Gm14446	1.57592	0.656198	1.57592	down
Ifit1	1.76661	0.820985	1.76661	down
Dntt	2.32593	1.21781	2.32593	down
Frat2	2.44239	1.2883	2.44239	down
Ubtd1	3.32442	1.7331	3.32442	down
Pyroxd2	1.65022	0.722658	1.65022	down
Dnmbp	1.78677	0.837352	1.78677	down
Sufu	1.62588	0.701218	1.62588	down
Trim8	2.32384	1.21651	2.32384	down
Sh3pxd2a	3.64764	1.86696	3.64764	down
Pdcd4	2.39685	1.26114	2.39685	down
Hspa12a	2.70898	1.43775	2.70898	down
Nanos1	3.14099	1.65122	3.14099	down
Gm15253	1.80365	0.85092	1.80365	down
Syp	2.00669	1.00482	2.00669	down
Prickle3	1.55013	0.632391	1.55013	down
Kcnd1	2.27437	1.18547	2.27437	down
Pim2	1.62398	0.699531	1.62398	down
Gata1	3.51657	1.81417	3.51657	down
Wdr13	1.69754	0.763442	1.69754	down
Gpr34	1.99391	0.995598	1.99391	down
Sh2d1a	2.45194	1.29392	2.45194	down
Cxx1c	4.30118	2.10473	4.30118	down
Gm14718	16.0058	4.00052	16.0058	down
Arhgap4	1.56584	0.64694	1.56584	down
Taz	1.63883	0.712667	1.63883	down
Gdi1	1.50652	0.591215	1.50652	down
Plxna3	2.08092	1.05722	2.08092	down
Mpp1	2.18449	1.12729	2.18449	down
Maged1	2.06834	1.04847	2.06834	down
Zc3h12b	1.68348	0.75145	1.68348	down
Efnb1	2.09794	1.06898	2.09794	down
Dlg3	1.52939	0.612959	1.52939	down
Chic1	1.90684	0.931185	1.90684	down
A630033H20Rik	1.57357	0.654042	1.57357	down
Diap2	1.54707	0.629534	1.54707	down
Xkrx	2.77554	1.47277	2.77554	down
Armcx6	1.7013	0.766637	1.7013	down
Armcx3	1.56765	0.648602	1.56765	down
Armcx2	2.27877	1.18825	2.27877	down
Gprasp1	1.85885	0.894409	1.85885	down
Gprasp2	2.31646	1.21192	2.31646	down
BC065397	1.76123	0.816582	1.76123	down
Fam199x	1.52732	0.611007	1.52732	down
Rnf128	3.41572	1.77219	3.41572	down
Tsc22d3	2.71054	1.43858	2.71054	down
Kctd12b	2.29715	1.19984	2.29715	down
Sat1	1.59695	0.675315	1.59695	down
Gpm6b	7.92167	2.98581	7.92167	down
Tlr7	1.8136	0.858855	1.8136	down
Arhgap6	2.54231	1.34614	2.54231	down

## Sheet: HDM_UP_678
Gene Symbol	FC	Log FC	FC (abs)	Regulation KO vs WT
Sulf1	-2.83252	-1.50209	2.83252	up
Ogfrl1	-1.53868	-0.621693	1.53868	up
Dst	-1.99814	-0.998654	1.99814	up
AC127433.1	-2.42575	-1.27843	2.42575	up
2010300C02Rik	-3.25521	-1.70275	3.25521	up
AC161534.1	-1.85758	-0.893421	1.85758	up
Col3a1	-5.24249	-2.39025	5.24249	up
Col5a2	-4.46888	-2.15991	4.46888	up
Dnahc7a	-2.54239	-1.34619	2.54239	up
AC161493.1	-1.69227	-0.758962	1.69227	up
Aox3	-3.50149	-1.80797	3.50149	up
Fzd7	-2.55774	-1.35487	2.55774	up
Bmpr2	-1.66294	-0.733739	1.66294	up
Mtap2	-3.43199	-1.77905	3.43199	up
Igfbp5	-5.57286	-2.47842	5.57286	up
Pnkd	-2.07792	-1.05514	2.07792	up
Tmbim1	-1.62235	-0.698086	1.62235	up
Des	-3.2768	-1.71229	3.2768	up
Scg2	-1.6906	-0.757534	1.6906	up
Serpine2	-2.6205	-1.38984	2.6205	up
Fam124b	-2.21673	-1.14843	2.21673	up
Gm15433	-1.85324	-0.890046	1.85324	up
Gm7592	-1.95863	-0.969847	1.95863	up
Col6a3	-3.66222	-1.87272	3.66222	up
Rbm44	-1.88624	-0.91551	1.88624	up
Tnfrsf11a	-1.68987	-0.756916	1.68987	up
Tfcp2l1	-1.56846	-0.649351	1.56846	up
Sox13	-3.71204	-1.89221	3.71204	up
Chi3l1	-3.40673	-1.76839	3.40673	up
Phlda3	-2.95969	-1.56545	2.95969	up
Cacna1s	-1.77809	-0.830327	1.77809	up
5730559C18Rik	-2.43434	-1.28353	2.43434	up
Lamc2	-3.92185	-1.97153	3.92185	up
Lamc1	-1.7766	-0.829115	1.7766	up
E330020D12Rik	-2.08676	-1.06127	2.08676	up
Rgs8	-5.10311	-2.35138	5.10311	up
Rgs16	-2.07079	-1.05018	2.07079	up
Pbx1	-2.43972	-1.28671	2.43972	up
Atp1a2	-2.47478	-1.3073	2.47478	up
Slamf8	-2.39392	-1.25937	2.39392	up
Gm4955	-1.92394	-0.944063	1.92394	up
BC094916	-1.94461	-0.959484	1.94461	up
Pydc4	-1.50042	-0.585369	1.50042	up
Pyhin1	-1.68529	-0.752998	1.68529	up
Mnda	-2.10591	-1.07444	2.10591	up
Gm5069	-1.50459	-0.589367	1.50459	up
Prox1	-2.62003	-1.38958	2.62003	up
Lamb3	-1.64783	-0.720564	1.64783	up
Fam171a1	-2.79657	-1.48366	2.79657	up
Frmd4a	-1.95239	-0.965243	1.95239	up
Optn	-1.55704	-0.63881	1.55704	up
4930412O13Rik	-1.74318	-0.801724	1.74318	up
9230102O04Rik	-1.8006	-0.848475	1.8006	up
Itih5	-1.9685	-0.9771	1.9685	up
St8sia6	-1.64065	-0.714263	1.64065	up
Etl4	-2.8104	-1.49077	2.8104	up
Nrarp	-1.5538	-0.635798	1.5538	up
Rnf208	-2.48249	-1.31179	2.48249	up
Fut7	-1.86654	-0.900368	1.86654	up
Ralgds	-1.54524	-0.62783	1.54524	up
Usp20	-1.53431	-0.617592	1.53431	up
Lcn2	-3.50359	-1.80883	3.50359	up
Hc	-3.40048	-1.76574	3.40048	up
AI182371	-1.94939	-0.963021	1.94939	up
Gsn	-2.47739	-1.30882	2.47739	up
Rnd3	-2.52455	-1.33603	2.52455	up
1700057H21Rik	-4.78143	-2.25744	4.78143	up
Rbm43	-1.50429	-0.589083	1.50429	up
Tnfaip6	-2.08331	-1.05887	2.08331	up
Ifih1	-1.58741	-0.666678	1.58741	up
Gca	-2.75772	-1.46348	2.75772	up
Galnt3	-1.65637	-0.728021	1.65637	up
B3galt1	-3.71539	-1.89351	3.71539	up
Ttc30a1	-2.18554	-1.12799	2.18554	up
Ttn	-1.61312	-0.689849	1.61312	up
Fam171b	-1.62772	-0.70285	1.62772	up
Ctnnd1	-1.85543	-0.891755	1.85543	up
Serping1	-3.99188	-1.99707	3.99188	up
Ube2l6	-1.68517	-0.752892	1.68517	up
Gm9821	-1.65563	-0.727382	1.65563	up
Creb3l1	-1.60727	-0.684608	1.60727	up
Gyltl1b	-2.93979	-1.55572	2.93979	up
Pex16	-1.59927	-0.677413	1.59927	up
1700029I15Rik	-1.6895	-0.756596	1.6895	up
Mapk8ip1	-2.09317	-1.06569	2.09317	up
Prr5l	-1.58013	-0.660042	1.58013	up
Gpr176	-3.13176	-1.64697	3.13176	up
Spint1	-2.43309	-1.28279	2.43309	up
Pla2g4f	-2.18862	-1.13002	2.18862	up
Tgm7	-2.29073	-1.19581	2.29073	up
Mtap1a	-1.93064	-0.949075	1.93064	up
Ckmt1	-4.22303	-2.07828	4.22303	up
Sema6d	-3.66328	-1.87314	3.66328	up
Nphp1	-1.8973	-0.923945	1.8973	up
Prnp	-1.69862	-0.764362	1.69862	up
Cst7	-1.57578	-0.656063	1.57578	up
Slc52a3	-1.55178	-0.633927	1.55178	up
8430427H17Rik	-1.75671	-0.81288	1.75671	up
Necab3	-2.0428	-1.03055	2.0428	up
Ggt7	-1.70094	-0.766333	1.70094	up
9830001H06Rik	-2.01615	-1.0116	2.01615	up
Lpin3	-2.38243	-1.25244	2.38243	up
Gm11454	-2.68119	-1.42287	2.68119	up
Pabpc1l	-1.58897	-0.668089	1.58897	up
Slc13a3	-3.66035	-1.87198	3.66035	up
Bcas1	-2.46674	-1.30261	2.46674	up
Edn3	-15.7821	-3.98021	15.7821	up
Zbtb46	-1.56718	-0.648169	1.56718	up
Chmp4c	-1.69806	-0.763888	1.69806	up
Cp	-2.48329	-1.31225	2.48329	up
Tnfsf10	-1.61216	-0.688995	1.61216	up
Postn	-4.01537	-2.00553	4.01537	up
Pfn2	-1.72076	-0.783044	1.72076	up
Mbnl1	-1.65234	-0.724515	1.65234	up
Mme	-3.57875	-1.83946	3.57875	up
Gucy1b3	-3.03299	-1.60074	3.03299	up
Fhdc1	-3.119	-1.64108	3.119	up
Fam160a1	-3.12778	-1.64514	3.12778	up
Ntrk1	-1.92581	-0.945462	1.92581	up
She	-1.53049	-0.613998	1.53049	up
Slc27a3	-2.63006	-1.3951	2.63006	up
Tdpoz4	-3.62075	-1.85629	3.62075	up
Cd160	-1.9306	-0.949047	1.9306	up
Cd101	-1.90847	-0.932418	1.90847	up
Ptgfrn	-1.93973	-0.955854	1.93973	up
Igsf3	-1.8079	-0.854318	1.8079	up
Olfml3	-2.90314	-1.53761	2.90314	up
Bcl2l15	-1.83313	-0.874305	1.83313	up
Fam19a3	-1.94062	-0.956521	1.94062	up
Chia	-4.23103	-2.08101	4.23103	up
Gstm5	-2.71951	-1.44335	2.71951	up
5330417C22Rik	-2.71314	-1.43996	2.71314	up
Vcam1	-1.98696	-0.990564	1.98696	up
F3	-3.37261	-1.75386	3.37261	up
Enpep	-3.07981	-1.62284	3.07981	up
Cyp2u1	-1.77318	-0.826337	1.77318	up
Nhedc2	-1.54289	-0.625636	1.54289	up
Gbp7	-1.52199	-0.605955	1.52199	up
Cyr61	-1.97374	-0.980929	1.97374	up
Mcoln3	-2.20693	-1.14204	2.20693	up
Ifi44	-3.51535	-1.81367	3.51535	up
Penk	-2.49733	-1.32039	2.49733	up
A830012C17Rik	-2.44575	-1.29028	2.44575	up
Asph	-1.78292	-0.834243	1.78292	up
2610301B20Rik	-1.58333	-0.662958	1.58333	up
Gem	-1.66214	-0.733044	1.66214	up
Cdh17	-4.76732	-2.25318	4.76732	up
Tesk1	-1.65994	-0.73113	1.65994	up
Col15a1	-1.64766	-0.720415	1.64766	up
Ptpn3	-1.55932	-0.640918	1.55932	up
D630039A03Rik	-1.57678	-0.65698	1.57678	up
Bspry	-1.55594	-0.637783	1.55594	up
Rgs3	-1.66025	-0.731401	1.66025	up
Col27a1	-1.55218	-0.6343	1.55218	up
Cntln	-1.56509	-0.646245	1.56509	up
Wdr78	-1.63949	-0.713251	1.63949	up
Echdc2	-1.78808	-0.838415	1.78808	up
Gpx7	-1.74202	-0.800757	1.74202	up
Pdzk1ip1	-2.05245	-1.03735	2.05245	up
Pik3r3	-1.68001	-0.748467	1.68001	up
Slc6a9	-1.9122	-0.93523	1.9122	up
5730409E04Rik	-1.63824	-0.712143	1.63824	up
C77080	-2.01906	-1.01368	2.01906	up
Tinagl1	-1.78139	-0.833001	1.78139	up
Smpdl3b	-2.44869	-1.29201	2.44869	up
Aim1l	-1.6688	-0.73881	1.6688	up
Cd52	-1.65561	-0.72736	1.65561	up
Ubxn11	-2.04169	-1.02976	2.04169	up
Slc30a2	-3.64389	-1.86548	3.64389	up
Hspg2	-3.01844	-1.59381	3.01844	up
Camk2n1	-1.69084	-0.757744	1.69084	up
Nbl1	-2.32	-1.21413	2.32	up
Gm13032	-2.24936	-1.16951	2.24936	up
Padi2	-1.92254	-0.94301	1.92254	up
Fblim1	-2.33027	-1.2205	2.33027	up
Gm13081	-1.64736	-0.720156	1.64736	up
Hgf	-1.84572	-0.884183	1.84572	up
Pion	-1.61151	-0.688415	1.61151	up
Emilin1	-1.51916	-0.603278	1.51916	up
Slc30a3	-3.03891	-1.60355	3.03891	up
Hgfac	-2.06688	-1.04745	2.06688	up
Sh3tc1	-1.84412	-0.882933	1.84412	up
Ppp2r2c	-2.04803	-1.03424	2.04803	up
Cc2d2a	-5.00662	-2.32384	5.00662	up
Cd38	-1.52229	-0.606247	1.52229	up
Gpr125	-2.33857	-1.22563	2.33857	up
Sod3	-2.54544	-1.34792	2.54544	up
Slc34a2	-5.0352	-2.33205	5.0352	up
Tbc1d19	-1.53332	-0.616662	1.53332	up
Rbm47	-1.92589	-0.945523	1.92589	up
Nsun7	-2.64239	-1.40184	2.64239	up
Limch1	-2.75432	-1.4617	2.75432	up
C530008M17Rik	-2.34516	-1.22969	2.34516	up
Hopx	-1.58078	-0.660639	1.58078	up
Spink2	-3.13568	-1.64878	3.13568	up
Igfbp7	-1.99036	-0.99303	1.99036	up
Afm	-2.26629	-1.18034	2.26629	up
Rassf6	-3.88389	-1.9575	3.88389	up
Cxcl15	-3.39999	-1.76553	3.39999	up
Cxcl1	-2.34897	-1.23203	2.34897	up
Rasgef1b	-1.56741	-0.648386	1.56741	up
Sparcl1	-2.56901	-1.36121	2.56901	up
Pkd2	-1.96973	-0.977996	1.96973	up
Gbp10	-1.50101	-0.585933	1.50101	up
Asphd2	-3.16712	-1.66317	3.16712	up
2900026A02Rik	-2.46149	-1.29953	2.46149	up
Vsig10	-1.71082	-0.774689	1.71082	up
Ksr2	-1.76	-0.815579	1.76	up
Nos1	-6.31216	-2.65813	6.31216	up
Gm9754	-1.97881	-0.984637	1.97881	up
Oas1a	-1.64044	-0.714082	1.64044	up
Rph3a	-8.1919	-3.0342	8.1919	up
Hvcn1	-1.55682	-0.638598	1.55682	up
Gpr133	-2.41691	-1.27316	2.41691	up
Gtf2ird1	-2.09911	-1.06978	2.09911	up
Eln	-4.70128	-2.23305	4.70128	up
Hip1	-1.59414	-0.672778	1.59414	up
Hspb1	-2.07621	-1.05395	2.07621	up
Zan	-2.05944	-1.04225	2.05944	up
Adap1	-1.57604	-0.656306	1.57604	up
Fscn1	-2.55913	-1.35565	2.55913	up
2210417A02Rik	-2.2079	-1.14268	2.2079	up
Col1a2	-5.06194	-2.33969	5.06194	up
Pon3	-1.76149	-0.816794	1.76149	up
Pdk4	-2.39971	-1.26286	2.39971	up
Ica1	-2.04956	-1.03531	2.04956	up
AC113309.1	-1.77193	-0.825321	1.77193	up
Cald1	-2.23871	-1.16267	2.23871	up
Dgki	-3.39411	-1.76303	3.39411	up
Trbv5	-1.53392	-0.617227	1.53392	up
AC153851.2	-1.87136	-0.904085	1.87136	up
Epha1	-2.03379	-1.02417	2.03379	up
Fam115a	-5.61709	-2.48982	5.61709	up
Arhgef5	-2.00354	-1.00255	2.00354	up
Sspo	-2.08892	-1.06276	2.08892	up
Atp6v0e2	-3.13258	-1.64735	3.13258	up
Gimap7	-1.61822	-0.694404	1.61822	up
9530036M11Rik	-2.52001	-1.33343	2.52001	up
Prdm5	-1.5198	-0.603879	1.5198	up
Sftpb	-3.51486	-1.81347	3.51486	up
Rtkn	-1.74515	-0.803352	1.74515	up
Slc4a5	-2.02334	-1.01674	2.02334	up
Actg2	-1.83214	-0.873532	1.83214	up
Fbxo41	-1.76632	-0.820749	1.76632	up
1700019G17Rik	-1.77403	-0.827033	1.77403	up
Tgfa	-2.59911	-1.37802	2.59911	up
Antxr1	-2.67092	-1.41733	2.67092	up
Hdac11	-1.64519	-0.718257	1.64519	up
Pdzrn3	-2.48092	-1.31087	2.48092	up
Srgap3	-1.66246	-0.733322	1.66246	up
Pparg	-1.68079	-0.749138	1.68079	up
2510049J12Rik	-11.6748	-3.54533	11.6748	up
Mical3	-1.59914	-0.677299	1.59914	up
Mical3	-1.86954	-0.90268	1.86954	up
Usp18	-1.53017	-0.61369	1.53017	up
C1ra	-3.09303	-1.62902	3.09303	up
C1s	-2.79179	-1.48119	2.79179	up
Gm20531	-1.57675	-0.65695	1.57675	up
Leprel2	-1.97932	-0.985007	1.97932	up
Bcl2l14	-2.18203	-1.12567	2.18203	up
Mgp	-3.1108	-1.63728	3.1108	up
Ppfibp1	-1.65045	-0.722863	1.65045	up
Bicd1	-2.11032	-1.07746	2.11032	up
Prkcg	-1.78604	-0.836763	1.78604	up
Ehd2	-2.57046	-1.36203	2.57046	up
Pglyrp1	-1.86007	-0.895355	1.86007	up
Bcam	-1.54933	-0.631648	1.54933	up
Ceacam16	-2.12374	-1.0866	2.12374	up
Zfp93	-1.65249	-0.724638	1.65249	up
Grik5	-1.52951	-0.613067	1.52951	up
Pou2f2	-1.58463	-0.664149	1.58463	up
Megf8	-2.24317	-1.16554	2.24317	up
Tmem91	-1.99698	-0.997823	1.99698	up
Axl	-2.98656	-1.57849	2.98656	up
Ltbp4	-2.17173	-1.11884	2.17173	up
Pak4	-1.54657	-0.629071	1.54657	up
Lgals7	-3.08004	-1.62295	3.08004	up
Zfp14	-1.96816	-0.976851	1.96816	up
Tmem149	-1.83503	-0.875805	1.83503	up
Zbtb32	-1.76858	-0.822588	1.76858	up
Lsr	-2.37221	-1.24623	2.37221	up
AC149055.1	-2.16921	-1.11717	2.16921	up
Slc7a10	-4.80435	-2.26434	4.80435	up
Lrp3	-3.2081	-1.68172	3.2081	up
Zfp536	-2.38952	-1.25672	2.38952	up
Siglec5	-23.5759	-4.55924	23.5759	up
Nkg7	-2.06583	-1.04672	2.06583	up
Kcnc3	-6.29874	-2.65506	6.29874	up
Prrg2	-1.51316	-0.59756	1.51316	up
Plekha4	-2.45791	-1.29743	2.45791	up
Lmtk3	-1.52693	-0.610636	1.52693	up
Grin2d	-1.71637	-0.779359	1.71637	up
Trpm1	-1.7848	-0.835761	1.7848	up
Chsy1	-2.13531	-1.09444	2.13531	up
Lrrk1	-2.47244	-1.30593	2.47244	up
Arrdc4	-1.60036	-0.678397	1.60036	up
Fam174b	-1.54611	-0.628645	1.54611	up
Isg20	-1.64933	-0.721884	1.64933	up
Pex11a	-2.18972	-1.13074	2.18972	up
Fah	-1.70009	-0.765609	1.70009	up
Kctd14	-1.91595	-0.938063	1.91595	up
Ints4	-1.65177	-0.724009	1.65177	up
Capn5	-2.14901	-1.10367	2.14901	up
Neu3	-1.69029	-0.757274	1.69029	up
P4ha3	-4.267	-2.09322	4.267	up
Arhgef17	-2.43146	-1.28182	2.43146	up
Swap70	-1.5189	-0.603022	1.5189	up
Spon1	-2.12835	-1.08973	2.12835	up
Tacc2	-2.13592	-1.09486	2.13592	up
Chst15	-2.6408	-1.40098	2.6408	up
Stk32c	-1.72463	-0.786289	1.72463	up
Kndc1	-2.47369	-1.30667	2.47369	up
Cttn	-2.15825	-1.10986	2.15825	up
Tnfsf13b	-1.96239	-0.972615	1.96239	up
Mcf2l	-1.79023	-0.840142	1.79023	up
Plat	-1.87949	-0.910339	1.87949	up
Fut10	-2.59786	-1.37733	2.59786	up
Rbpms	-2.91448	-1.54324	2.91448	up
D8Ertd82e	-1.57907	-0.659075	1.57907	up
Wwc2	-1.85806	-0.893793	1.85806	up
Large	-1.62807	-0.703159	1.62807	up
Cacna1a	-1.534	-0.617296	1.534	up
Dand5	-1.63412	-0.708517	1.63412	up
Mmp2	-2.92378	-1.54783	2.92378	up
Kifc3	-4.01755	-2.00632	4.01755	up
Ces2c	-2.36715	-1.24315	2.36715	up
Cdh1	-1.98563	-0.989598	1.98563	up
Mlkl	-2.08499	-1.06004	2.08499	up
Tmem231	-2.26023	-1.17647	2.26023	up
Wwox	-2.07566	-1.05357	2.07566	up
Crispld2	-2.3099	-1.20783	2.3099	up
Snai3	-1.82002	-0.863953	1.82002	up
Pcnxl2	-4.78569	-2.25873	4.78569	up
Nrp1	-1.54442	-0.627064	1.54442	up
Endod1	-1.75961	-0.815256	1.75961	up
Gpr83	-1.75673	-0.812894	1.75673	up
Folr4	-1.58311	-0.662766	1.58311	up
4931406C07Rik	-1.86037	-0.895593	1.86037	up
Olfm2	-2.70574	-1.43603	2.70574	up
Col5a3	-2.31686	-1.21217	2.31686	up
mmu-mir-1900	-1.75303	-0.809849	1.75303	up
Icam5	-1.54263	-0.62539	1.54263	up
Pde4a	-2.28328	-1.19111	2.28328	up
St14	-2.04345	-1.03101	2.04345	up
Nrgn	-2.81436	-1.49281	2.81436	up
Phldb1	-1.57873	-0.658768	1.57873	up
Dscaml1	-15.9896	-3.99906	15.9896	up
Bco2	-4.36928	-2.1274	4.36928	up
Il18	-3.87671	-1.95483	3.87671	up
Cryab	-2.27394	-1.18519	2.27394	up
Fdx1	-1.56851	-0.649397	1.56851	up
Exph5	-4.65632	-2.21919	4.65632	up
Kdelc2	-1.66523	-0.735722	1.66523	up
Cib2	-5.22537	-2.38553	5.22537	up
AC165246.1	-3.73995	-1.90302	3.73995	up
Loxl1	-4.38225	-2.13167	4.38225	up
Lrrc49	-1.89911	-0.925324	1.89911	up
Dapk2	-2.51998	-1.33341	2.51998	up
Fam81a	-1.92887	-0.947752	1.92887	up
Myo1e	-1.75673	-0.812889	1.75673	up
Myo5c	-3.41861	-1.77341	3.41861	up
Gnb5	-1.5288	-0.612404	1.5288	up
Lysmd2	-1.66437	-0.734978	1.66437	up
Col12a1	-29.5046	-4.88287	29.5046	up
Filip1	-3.31506	-1.72904	3.31506	up
Irak1bp1	-1.53216	-0.615569	1.53216	up
Hmgn3	-1.82927	-0.871271	1.82927	up
Me1	-2.28077	-1.18952	2.28077	up
Col6a5	-6.24193	-2.64199	6.24193	up
Hyal2	-1.83561	-0.876257	1.83561	up
Klhdc8b	-1.587	-0.666304	1.587	up
Plxnb1	-1.58178	-0.661546	1.58178	up
Kif9	-1.78931	-0.839407	1.78931	up
Ccrl2	-1.61108	-0.688026	1.61108	up
Ccr8	-1.56941	-0.65022	1.56941	up
Ulk4	-2.20554	-1.14113	2.20554	up
Cdcp1	-3.41974	-1.77389	3.41974	up
Xcr1	-1.6188	-0.694924	1.6188	up
Akap7	-1.93747	-0.954172	1.93747	up
Mettl24	-2.20554	-1.14113	2.20554	up
Chst3	-1.68722	-0.754645	1.68722	up
Aifm2	-1.50804	-0.592678	1.50804	up
2010107G23Rik	-1.64875	-0.721371	1.64875	up
Susd2	-3.22392	-1.68881	3.22392	up
Gm20441	-2.0484	-1.0345	2.0484	up
Gstt3	-1.81065	-0.856504	1.81065	up
Gstt1	-2.88226	-1.5272	2.88226	up
Col6a2	-3.5261	-1.81807	3.5261	up
Col6a1	-3.84048	-1.94129	3.84048	up
Kiss1r	-1.73865	-0.797968	1.73865	up
Atcay	-1.63956	-0.713309	1.63956	up
Gipc3	-1.81445	-0.859534	1.81445	up
Celf5	-1.51906	-0.603181	1.51906	up
Chst11	-1.80641	-0.853128	1.80641	up
Dram1	-2.63116	-1.3957	2.63116	up
Gm872	-1.87571	-0.90744	1.87571	up
Amdhd1	-2.74813	-1.45845	2.74813	up
Ccdc38	-2.51305	-1.32944	2.51305	up
Dcn	-6.66792	-2.73724	6.66792	up
Cep290	-2.01477	-1.01062	2.01477	up
Myl6b	-1.51875	-0.602882	1.51875	up
Ikzf4	-1.59911	-0.677265	1.59911	up
Suox	-1.57158	-0.652214	1.57158	up
Dusp18	-1.56425	-0.645469	1.56425	up
Grb10	-5.38847	-2.42987	5.38847	up
Cobl	-3.05544	-1.61138	3.05544	up
Slc1a4	-1.59834	-0.676573	1.59834	up
Lgalsl	-2.41223	-1.27037	2.41223	up
Stc2	-2.70528	-1.43578	2.70528	up
Rhbdf1	-2.1984	-1.13645	2.1984	up
Atp10b	-20.3871	-4.34959	20.3871	up
Nipal4	-3.92207	-1.97162	3.92207	up
Sparc	-2.89909	-1.5356	2.89909	up
Mfap4	-3.59002	-1.84399	3.59002	up
Myh13	-1.6427	-0.716068	1.6427	up
Gucy2e	-2.14642	-1.10193	2.14642	up
Tm4sf5	-2.35634	-1.23655	2.35634	up
6330403K07Rik	-1.95607	-0.967961	1.95607	up
Nlrp1a	-2.01878	-1.01349	2.01878	up
Nlrp1b	-2.06366	-1.04521	2.06366	up
Xaf1	-1.54524	-0.627833	1.54524	up
Itgae	-4.26043	-2.091	4.26043	up
Gsg2	-2.26017	-1.17643	2.26017	up
Pipox	-1.60258	-0.680397	1.60258	up
Tmem98	-1.93653	-0.953477	1.93653	up
Ccl1	-8.50811	-3.08884	8.50811	up
Tmem132e	-3.62736	-1.85892	3.62736	up
Slfn9	-1.50348	-0.588302	1.50348	up
Slfn8	-1.53307	-0.616427	1.53307	up
Slfn10-ps	-1.55078	-0.632994	1.55078	up
Rnf43	-1.95857	-0.969798	1.95857	up
Bzrap1	-2.13528	-1.09443	2.13528	up
Col1a1	-3.29629	-1.72084	3.29629	up
Samd14	-1.50278	-0.587634	1.50278	up
Hoxb4	-1.66909	-0.739063	1.66909	up
Sp6	-2.4501	-1.29284	2.4501	up
Gm11532	-2.37952	-1.25067	2.37952	up
Gpr179	-1.73739	-0.796919	1.73739	up
Zpbp2	-1.50436	-0.589152	1.50436	up
Jup	-3.35381	-1.7458	3.35381	up
Dhx58	-1.64124	-0.714788	1.64124	up
Kcnh4	-3.19659	-1.67654	3.19659	up
Tubg2	-1.64194	-0.715399	1.64194	up
Mrc2	-3.70457	-1.8893	3.70457	up
Cyb561	-2.14516	-1.10108	2.14516	up
Ccdc46	-3.7045	-1.88928	3.7045	up
Kif19a	-2.91582	-1.5439	2.91582	up
Btbd17	-3.50492	-1.80938	3.50492	up
Gprc5c	-3.55597	-1.83024	3.55597	up
Fads6	-1.54345	-0.626163	1.54345	up
Sphk1	-2.04095	-1.02924	2.04095	up
Ccdc40	-1.6215	-0.697326	1.6215	up
Sdc1	-1.58654	-0.665881	1.58654	up
Wdr35	-1.70883	-0.773011	1.70883	up
Cmpk2	-1.52267	-0.606602	1.52267	up
Slc26a4	-3.37012	-1.7528	3.37012	up
Sostdc1	-3.47653	-1.79765	3.47653	up
Ispd	-2.41903	-1.27443	2.41903	up
Scin	-3.48642	-1.80175	3.48642	up
Dock4	-2.51109	-1.32831	2.51109	up
Coch	-14.0101	-3.80839	14.0101	up
Akap6	-2.33282	-1.22207	2.33282	up
AC108401.2	-1.69675	-0.762773	1.69675	up
Vash1	-3.53352	-1.82111	3.53352	up
Unc79	-2.38495	-1.25396	2.38495	up
Ppp4r4	-1.93051	-0.948983	1.93051	up
D430019H16Rik	-1.83708	-0.877414	1.83708	up
Ckb	-1.56689	-0.647903	1.56689	up
AC160982.1	-16.8206	-4.07215	16.8206	up
Ighm	-1.97465	-0.981594	1.97465	up
Vipr2	-1.61845	-0.694611	1.61845	up
Amph	-4.16367	-2.05786	4.16367	up
Lrrc16a	-2.35568	-1.23614	2.35568	up
Aldh5a1	-1.97308	-0.980452	1.97308	up
Gpld1	-1.64689	-0.719744	1.64689	up
Nrn1	-3.60669	-1.85067	3.60669	up
Dsp	-1.76541	-0.82	1.76541	up
Edn1	-2.52056	-1.33374	2.52056	up
Ogn	-2.68326	-1.42399	2.68326	up
Rasgrf2	-1.61507	-0.691596	1.61507	up
Naip5	-1.85677	-0.892799	1.85677	up
Naip6	-2.40992	-1.26898	2.40992	up
Adamts6	-1.5262	-0.60994	1.5262	up
2610204G07Rik	-11.9303	-3.57656	11.9303	up
Gpx8	-2.02373	-1.01702	2.02373	up
Gm10044	-1.73189	-0.792345	1.73189	up
Nid2	-1.61644	-0.692821	1.61644	up
Vcl	-1.53162	-0.615057	1.53162	up
Zfp503	-4.90062	-2.29297	4.90062	up
Zcchc24	-1.61555	-0.692022	1.61555	up
Gm10395	-1.55569	-0.637557	1.55569	up
D14Ertd449e	-1.57103	-0.651706	1.57103	up
Gm9746	-1.52798	-0.611622	1.52798	up
Il17rb	-1.71808	-0.780801	1.71808	up
Chdh	-2.09213	-1.06497	2.09213	up
Colq	-1.73765	-0.797134	1.73765	up
Ogdhl	-1.87154	-0.904227	1.87154	up
1810011H11Rik	-2.96338	-1.56724	2.96338	up
Sftpa1	-3.46947	-1.79472	3.46947	up
Sftpd	-4.08036	-2.0287	4.08036	up
4930431P03Rik	-2.11326	-1.07947	2.11326	up
Sall2	-1.62143	-0.697269	1.62143	up
Trdv1	-1.73534	-0.795218	1.73534	up
Jub	-1.51473	-0.599061	1.51473	up
Rec8	-1.79983	-0.847861	1.79983	up
Adcy4	-2.26032	-1.17653	2.26032	up
Gzmc	-1.50987	-0.594428	1.50987	up
Gjb2	-2.34406	-1.22901	2.34406	up
Phf11	-1.51972	-0.603808	1.51972	up
Egr3	-1.80578	-0.852622	1.80578	up
Sftpc	-3.5056	-1.80966	3.5056	up
Lgi3	-3.79246	-1.92314	3.79246	up
Cysltr2	-1.67085	-0.740583	1.67085	up
C7	-2.6327	-1.39654	2.6327	up
Capsl	-2.036	-1.02574	2.036	up
Rai14	-1.77045	-0.824115	1.77045	up
Enpp2	-3.09453	-1.62972	3.09453	up
Fer1l6	-4.26073	-2.0911	4.26073	up
Tg	-1.81512	-0.860063	1.81512	up
Wisp1	-2.58752	-1.37157	2.58752	up
Fam83h	-2.08813	-1.06221	2.08813	up
Slc39a4	-1.54944	-0.631748	1.54944	up
Arhgap39	-1.9589	-0.970042	1.9589	up
Apol9b	-3.02794	-1.59834	3.02794	up
Apol7b	-1.78131	-0.83294	1.78131	up
Apol10b	-2.41407	-1.27147	2.41407	up
Apol7e	-1.74154	-0.800363	1.74154	up
Apol9a	-2.91035	-1.54119	2.91035	up
C1qtnf6	-2.02245	-1.01611	2.02245	up
Gm10863	-1.65543	-0.727209	1.65543	up
Kdelr3	-1.69093	-0.757817	1.69093	up
Pdgfb	-1.7787	-0.830827	1.7787	up
Tnfrsf13c	-2.05389	-1.03836	2.05389	up
Fam109b	-2.21444	-1.14694	2.21444	up
Ldoc1l	-1.56785	-0.648787	1.56785	up
Slc2a13	-9.56227	-3.25735	9.56227	up
Lrrk2	-4.67298	-2.22434	4.67298	up
AI836003	-1.69669	-0.762724	1.69669	up
Lalba	-2.50071	-1.32234	2.50071	up
Lima1	-2.31245	-1.20942	2.31245	up
AC161812.1	-1.52578	-0.609549	1.52578	up
5430421N21Rik	-1.92449	-0.944474	1.92449	up
Tenc1	-1.74181	-0.80059	1.74181	up
Igfbp6	-6.44026	-2.68712	6.44026	up
Nfe2	-3.95778	-1.98469	3.95778	up
Adcy9	-1.51591	-0.60018	1.51591	up
Glis2	-1.52086	-0.604892	1.52086	up
Abat	-2.16055	-1.1114	2.16055	up
Tnp2	-2.1421	-1.09902	2.1421	up
Litaf	-1.68762	-0.754993	1.68762	up
Scarf2	-3.80182	-1.92669	3.80182	up
2005-09-01	-1.98052	-0.985879	1.98052	up
Lamp3	-4.41568	-2.14264	4.41568	up
Tctex1d2	-1.64508	-0.718155	1.64508	up
Muc4	-2.99169	-1.58096	2.99169	up
Muc20	-1.84849	-0.886348	1.84849	up
Lmln	-1.75649	-0.812693	1.75649	up
Mylk	-2.43494	-1.28389	2.43494	up
Ildr1	-1.60575	-0.683251	1.60575	up
Fbxo40	-2.56936	-1.36141	2.56936	up
Cd80	-2.06346	-1.04507	2.06346	up
Ccdc80	-3.50556	-1.80965	3.50556	up
Alcam	-1.91771	-0.939387	1.91771	up
Arl6	-1.83655	-0.877002	1.83655	up
Kcnj15	-2.28276	-1.19078	2.28276	up
Dscam	-2.24814	-1.16873	2.24814	up
Bace2	-2.0158	-1.01135	2.0158	up
Mx1	-1.50094	-0.585864	1.50094	up
Ripk4	-2.33434	-1.22301	2.33434	up
Tiam2	-1.9672	-0.976145	1.9672	up
AC122821.2	-2.48603	-1.31384	2.48603	up
Prss41	-1.89861	-0.924942	1.89861	up
Prss30	-2.66822	-1.41588	2.66822	up
Tead3	-2.9287	-1.55026	2.9287	up
Tff1	-2.69298	-1.4292	2.69298	up
Tmprss3	-2.623	-1.39122	2.623	up
Cyp4f16	-1.71607	-0.779109	1.71607	up
Zfp870	-1.61791	-0.694136	1.61791	up
Angptl4	-1.72702	-0.788282	1.72702	up
Btnl4	-4.45829	-2.15649	4.45829	up
Btnl5	-4.81843	-2.26856	4.81843	up
Btnl6	-5.8247	-2.54218	5.8247	up
Tnxb	-2.86812	-1.52011	2.86812	up
C2	-1.68986	-0.756903	1.68986	up
Hspa1l	-1.8454	-0.88393	1.8454	up
Gm10501	-1.91644	-0.938429	1.91644	up
Ly6g5b	-1.75686	-0.812997	1.75686	up
Tnf	-1.54029	-0.623198	1.54029	up
Lta	-1.55672	-0.638514	1.55672	up
Enpp5	-1.87227	-0.904789	1.87227	up
Ptk7	-3.30143	-1.72309	3.30143	up
AI661453	-3.09582	-1.63032	3.09582	up
Ebi3	-1.8733	-0.905579	1.8733	up
AC154235.1	-1.61749	-0.693758	1.61749	up
C3	-3.70992	-1.89139	3.70992	up
Lclat1	-1.89932	-0.925484	1.89932	up
Sult6b1	-2.2933	-1.19742	2.2933	up
Pkdcc	-10.8144	-3.43489	10.8144	up
Plekhh2	-1.86023	-0.895484	1.86023	up
Dync2li1	-1.88172	-0.91205	1.88172	up
Slc3a1	-1.65687	-0.72846	1.65687	up
Socs5	-1.64464	-0.717768	1.64464	up
Ston1	-1.50404	-0.58884	1.50404	up
9430020K01Rik	-1.82041	-0.86426	1.82041	up
Colec12	-1.67751	-0.746325	1.67751	up
Reep2	-1.76468	-0.819405	1.76468	up
1700066B19Rik	-1.76572	-0.820259	1.76572	up
Arap3	-2.12156	-1.08512	2.12156	up
Dpysl3	-3.06525	-1.61601	3.06525	up
Ppic	-1.53421	-0.617497	1.53421	up
Gm4841	-1.54211	-0.624909	1.54211	up
Pdgfrb	-2.28267	-1.19072	2.28267	up
Alpk2	-1.81459	-0.859646	1.81459	up
Impa2	-1.51095	-0.59546	1.51095	up
Rab27b	-2.54086	-1.34531	2.54086	up
Ctif	-1.62101	-0.696893	1.62101	up
Hsbp1l1	-1.86676	-0.900537	1.86676	up
Acy3	-3.66197	-1.87262	3.66197	up
BC021614	-1.82826	-0.870468	1.82826	up
Spnb3	-2.13092	-1.09147	2.13092	up
Npas4	-1.98759	-0.991019	1.98759	up
Cst6	-2.4443	-1.28942	2.4443	up
Ctsw	-1.97855	-0.98444	1.97855	up
Efemp2	-1.60991	-0.686976	1.60991	up
Ltbp3	-2.46024	-1.2988	2.46024	up
Plcb3	-1.57878	-0.658813	1.57878	up
A430093F15Rik	-1.76557	-0.820133	1.76557	up
Slc15a3	-1.60606	-0.683525	1.60606	up
Tmem132a	-1.5695	-0.650304	1.5695	up
Ms4a6c	-2.25352	-1.17218	2.25352	up
Gna14	-1.96675	-0.97581	1.96675	up
Mamdc2	-2.82416	-1.49782	2.82416	up
Tjp2	-1.57569	-0.655981	1.57569	up
Insl6	-1.96423	-0.973961	1.96423	up
Pdcd1lg2	-1.80235	-0.849881	1.80235	up
Il33	-4.23571	-2.08261	4.23571	up
Gldc	-2.52313	-1.33521	2.52313	up
Gm14446	-1.55907	-0.640689	1.55907	up
I830012O16Rik	-1.59575	-0.674235	1.59575	up
O3far1	-2.57993	-1.36733	2.57993	up
Pik3ap1	-2.84007	-1.50592	2.84007	up
Scd1	-2.89059	-1.53137	2.89059	up
Lzts2	-1.53691	-0.620033	1.53691	up
Calhm2	-1.52137	-0.605369	1.52137	up
Gpam	-1.53441	-0.617686	1.53441	up
Tectb	-78.8631	-6.30128	78.8631	up
4930506M07Rik	-2.09181	-1.06475	2.09181	up
Foxp3	-1.57918	-0.659178	1.57918	up
Kcnd1	-2.02259	-1.01621	2.02259	up
Cybb	-4.61451	-2.20618	4.61451	up
Gpr34	-1.51272	-0.597145	1.51272	up
Syn1	-2.24782	-1.16853	2.24782	up
Gpc3	-4.05066	-2.01816	4.05066	up
Ncrna00086	-2.69202	-1.42869	2.69202	up
Bgn	-2.94942	-1.56043	2.94942	up
Slc6a8	-1.66466	-0.735225	1.66466	up
Pdzd4	-1.72827	-0.789329	1.72827	up
Pls3	-1.55052	-0.632749	1.55052	up
Dmd	-1.7575	-0.813525	1.7575	up
Pcyt1b	-1.74727	-0.8051	1.74727	up
Gspt2	-1.95143	-0.964532	1.95143	up
Spin4	-2.29428	-1.19804	2.29428	up
Zdhhc15	-1.73756	-0.797059	1.73756	up
Magee2	-5.23646	-2.38859	5.23646	up
Fgf16	-4.97103	-2.31354	4.97103	up
Sh3bgrl	-1.52545	-0.609237	1.52545	up
Gprasp2	-1.99891	-0.999216	1.99891	up
Arxes2	-1.55295	-0.635013	1.55295	up
Tceal8	-1.75819	-0.814089	1.75819	up
Bex1	-1.80751	-0.854007	1.80751	up
Tceal3	-2.23125	-1.15785	2.23125	up
Zcchc18	-1.5007	-0.585634	1.5007	up
Mid2	-1.73026	-0.790993	1.73026	up
Fgd1	-1.5676	-0.648561	1.5676	up
Car5b	-3.18485	-1.67123	3.18485	up
Gpm6b	-3.27547	-1.7117	3.27547	up
Egfl6	-2.27197	-1.18394	2.27197	up
Tlr7	-2.92213	-1.54702	2.92213	up

## Sheet: HDM_DOWN_395
Gene Symbol	FC	Log FC	FC (abs)	Regulation KO vs WT
Il17a	3.54752	1.82681	3.54752	down
Il17f	6.34874	2.66647	6.34874	down
Khdc1b	6.8761	2.78159	6.8761	down
Arid5a	2.36276	1.24047	2.36276	down
Stat4	1.515	0.599314	1.515	down
Ica1l	7.293	2.86651	7.293	down
Icos	1.76415	0.818976	1.76415	down
AL645646.1	1.50119	0.586109	1.50119	down
Acsl3	2.12166	1.0852	2.12166	down
Cd55	1.75972	0.815344	1.75972	down
Il10	1.95796	0.969351	1.95796	down
Ptprv	2.17709	1.1224	2.17709	down
Camsap2	1.77936	0.831362	1.77936	down
Zfp281	1.6468	0.719665	1.6468	down
B3galt2	1.87492	0.90683	1.87492	down
Prg4	1.94696	0.961226	1.94696	down
Slamf1	2.33226	1.22173	2.33226	down
Cnst	1.55674	0.638525	1.55674	down
Sccpdh	3.31655	1.72968	3.31655	down
Gm13199	2.88991	1.53102	2.88991	down
C630004M23RIK	1.61686	0.693193	1.61686	down
Prkcq	1.64328	0.716576	1.64328	down
Otud1	1.68784	0.755181	1.68784	down
Stxbp1	1.83362	0.874691	1.83362	down
Acvr2a	1.90508	0.929853	1.90508	down
Neb	2.36021	1.23892	2.36021	down
Arl5a	2.62641	1.39309	2.62641	down
Ermn	1.52811	0.611752	1.52811	down
Gm13546	1.57292	0.653443	1.57292	down
Dapl1	4.52835	2.17898	4.52835	down
Tanc1	1.61957	0.695614	1.61957	down
Dpp4	1.80429	0.851431	1.80429	down
Rapgef4	1.55352	0.635541	1.55352	down
Gpr155	2.1181	1.08277	2.1181	down
Ube2e3	1.70368	0.768654	1.70368	down
Slc43a1	2.18796	1.12959	2.18796	down
Chrm4	1.74327	0.801796	1.74327	down
Syt13	1.73936	0.798558	1.73936	down
Abtb2	2.96785	1.56942	2.96785	down
Prrg4	1.65382	0.725803	1.65382	down
Frmd5	1.83692	0.877288	1.83692	down
Bambi-ps1	1.66158	0.732557	1.66158	down
Acoxl	2.23261	1.15873	2.23261	down
Bcl2l11	1.5135	0.597891	1.5135	down
Gfra4	39.0721	5.28807	39.0721	down
Adam33	8.87969	3.15051	8.87969	down
Smox	1.79866	0.846926	1.79866	down
Jag1	1.65111	0.723438	1.65111	down
Tasp1	2.10019	1.07052	2.10019	down
Trib3	1.50514	0.589895	1.50514	down
Gm11455	1.53308	0.616429	1.53308	down
Mmp9	6.18563	2.62892	6.18563	down
Bmp7	2.46264	1.30021	2.46264	down
9030418K01Rik	8.26164	3.04643	8.26164	down
Lama5	1.68706	0.754513	1.68706	down
Zbtb10	1.85656	0.892635	1.85656	down
AC140312.1	10.7023	3.41985	10.7023	down
Pag1	1.68693	0.754399	1.68693	down
Il21	3.95047	1.98202	3.95047	down
Gm12534	6.13499	2.61706	6.13499	down
Gm18588	1.7163	0.779305	1.7163	down
Ppm1l	1.51669	0.600931	1.51669	down
Rapgef2	1.65279	0.724902	1.65279	down
Fnip2	1.70114	0.766504	1.70114	down
Mex3a	1.57436	0.654767	1.57436	down
Lenep	8.63646	3.11044	8.63646	down
Il6ra	1.53241	0.615806	1.53241	down
Rorc	2.58846	1.37209	2.58846	down
Tdrkh	1.94732	0.961489	1.94732	down
Sema6c	2.05464	1.03889	2.05464	down
Mcl1	1.50017	0.585128	1.50017	down
Ecm1	1.56894	0.649788	1.56894	down
Plekho1	1.50303	0.587879	1.50303	down
Gm20628	1.65347	0.725497	1.65347	down
Gm12474	1.90346	0.928621	1.90346	down
Tspan2	1.74057	0.799562	1.74057	down
Kcna2	2.44043	1.28714	2.44043	down
S1pr1	2.10258	1.07216	2.10258	down
Gm9889	2.02348	1.01684	2.02348	down
Prss12	5.94864	2.57256	5.94864	down
Slc39a8	1.55207	0.634195	1.55207	down
Tspan5	1.70383	0.768784	1.70383	down
Lmo4	2.4864	1.31406	2.4864	down
Tmem64	2.11896	1.08336	2.11896	down
Bach2	3.19581	1.67618	3.19581	down
BC024582	2.22152	1.15155	2.22152	down
Ankrd6	1.70987	0.773884	1.70987	down
Mob3b	1.60529	0.682833	1.60529	down
B4galt1	1.6096	0.686702	1.6096	down
Ugcg	2.46982	1.3044	2.46982	down
Gm12543	2.3422	1.22786	2.3422	down
Tle1	1.5476	0.630029	1.5476	down
Raver2	1.68759	0.754966	1.68759	down
Pde4b	1.6875	0.754889	1.6875	down
Fam151a	108.749	6.76486	108.749	down
Osbpl9	1.66946	0.739377	1.66946	down
Ptprf	3.46293	1.792	3.46293	down
D130007C19Rik	1.58943	0.668509	1.58943	down
Maneal	1.86023	0.895481	1.86023	down
Tlr12	1.63653	0.710638	1.63653	down
Col16a1	3.06922	1.61787	3.06922	down
Padi4	14.6004	3.86793	14.6004	down
Gm13154	1.51361	0.59799	1.51361	down
Trp73	5.26287	2.39585	5.26287	down
Samd11	4.86555	2.2826	4.86555	down
Cdk6	1.54499	0.6276	1.54499	down
Rundc3b	1.90085	0.926647	1.90085	down
Rnf32	3.11534	1.63939	3.11534	down
Il6	3.80177	1.92667	3.80177	down
Jakmip1	1.55341	0.635438	1.55341	down
Klf3	2.17732	1.12255	2.17732	down
Txk	1.56896	0.649812	1.56896	down
Adamts3	2.03042	1.02178	2.03042	down
Areg	1.50552	0.590266	1.50552	down
Bmp2k	1.50793	0.592574	1.50793	down
Antxr2	1.81595	0.860725	1.81595	down
Agpat9	3.49067	1.8035	3.49067	down
Aff1	1.53267	0.616052	1.53267	down
Gbp11	3.36194	1.74929	3.36194	down
Tgfbr3	2.10971	1.07704	2.10971	down
A630023P12Rik	1.62739	0.702559	1.62739	down
Ulk1	1.78362	0.834807	1.78362	down
AC123795.1	20.0135	4.3229	20.0135	down
Tesc	1.7077	0.772052	1.7077	down
Ppp1cc	1.51047	0.594996	1.51047	down
Vps37b	1.7067	0.771211	1.7067	down
Abcb9	1.72981	0.79061	1.72981	down
Stx1a	1.55346	0.635486	1.55346	down
Gpr146	1.81032	0.856244	1.81032	down
Zfand2a	1.5742	0.65462	1.5742	down
Slc29a4	1.78527	0.836145	1.78527	down
Smo	2.18214	1.12574	2.18214	down
2410066E13Rik	2.30005	1.20167	2.30005	down
Gadd45a	1.92187	0.94251	1.92187	down
Vamp5	1.52951	0.613065	1.52951	down
Magi1	3.08851	1.62691	3.08851	down
Foxp1	1.61249	0.68929	1.61249	down
Plxnd1	1.6826	0.75069	1.6826	down
Il17ra	1.54547	0.628048	1.54547	down
Klrb1f	2.01518	1.01091	2.01518	down
Klrk1	2.42876	1.28022	2.42876	down
Emp1	2.48929	1.31573	2.48929	down
St8sia1	1.81785	0.862235	1.81785	down
Tm7sf3	1.65476	0.726625	1.65476	down
Lair1	1.99204	0.994244	1.99204	down
Dmwd	1.57736	0.657511	1.57736	down
Fbxo17	2.18168	1.12544	2.18168	down
Tmem86a	1.90724	0.93149	1.90724	down
Nav2	2.06873	1.04874	2.06873	down
Peg12	1.76864	0.822638	1.76864	down
AC127595.1	402.553	8.65304	402.553	down
Pde8a	1.61517	0.691685	1.61517	down
Arnt2	20.2913	4.34279	20.2913	down
P2ry2	2.71789	1.44248	2.71789	down
Sbf2	1.57134	0.651991	1.57134	down
Pde3b	2.33256	1.22191	2.33256	down
Calca	2.9588	1.56501	2.9588	down
Pik3c2a	1.82141	0.865054	1.82141	down
Il4ra	1.83381	0.874842	1.83381	down
Dctpp1	1.74314	0.80169	1.74314	down
Itgad	2.84339	1.50761	2.84339	down
Adam8	2.50986	1.32761	2.50986	down
5830411N06Rik	10.6186	3.40852	10.6186	down
B4galnt4	3.33539	1.73785	3.33539	down
Tnfrsf26	2.14017	1.09773	2.14017	down
Tnfrsf23	1.72988	0.79067	1.72988	down
Rasa3	1.74527	0.803449	1.74527	down
2610019F03Rik	2.45622	1.29644	2.45622	down
Kbtbd11	1.55595	0.637792	1.55595	down
Palld	1.50034	0.585287	1.50034	down
2210011C24Rik	2.11904	1.08341	2.11904	down
Podnl1	4.89929	2.29257	4.89929	down
Ddx28	1.57708	0.65726	1.57708	down
Ldhd	1.50078	0.585709	1.50078	down
Maf	312.09	8.28582	312.09	down
Gm20388	2.0023	1.00166	2.0023	down
Zcchc14	1.91499	0.937335	1.91499	down
Cpne7	5.37877	2.42728	5.37877	down
Galnt2	2.01022	1.00736	2.01022	down
1810008B01Rik	2.16092	1.11165	2.16092	down
Gm15775	1.7684	0.822445	1.7684	down
Irf2bp2	1.51853	0.602673	1.51853	down
Pard3	1.97824	0.984216	1.97824	down
Angptl6	1.96674	0.975803	1.96674	down
Cdkn2d	1.50225	0.587125	1.50225	down
Ap1m2	1.55248	0.634579	1.55248	down
Slc37a2	1.8224	0.865843	1.8224	down
Pvrl1	4.39382	2.13548	4.39382	down
Usp2	1.72498	0.78658	1.72498	down
Cxcr5	3.32274	1.73237	3.32274	down
Mpzl2	4.24777	2.08671	4.24777	down
Scn4b	1.77966	0.831599	1.77966	down
Pou2af1	5.49928	2.45924	5.49928	down
Coro2b	6.56331	2.71442	6.56331	down
Foxb1	6.86535	2.77933	6.86535	down
Gclc	1.9052	0.929942	1.9052	down
Cd109	2.31564	1.21141	2.31564	down
Myo6	12.266	3.61659	12.266	down
1190002N15Rik	2.93603	1.55387	2.93603	down
Slc9a9	1.51859	0.602734	1.51859	down
Ky	2.54768	1.34918	2.54768	down
Vipr1	2.25895	1.17565	2.25895	down
Tmem42	1.55447	0.636421	1.55447	down
Ccr1	2.22121	1.15134	2.22121	down
Ccr2	2.98189	1.57622	2.98189	down
Ccr5	2.32924	1.21986	2.32924	down
Ppp1r14c	1.84846	0.88632	1.84846	down
Fbxo30	1.62622	0.701519	1.62622	down
Ifngr1	1.53376	0.617076	1.53376	down
Myb	2.05493	1.03909	2.05493	down
Gm15270	3.54547	1.82598	3.54547	down
Slc16a10	1.9178	0.939453	1.9178	down
Scml4	1.64145	0.714967	1.64145	down
Spock2	2.8487	1.51031	2.8487	down
Cdh23	4.67651	2.22543	4.67651	down
4632428N05Rik	1.73042	0.791124	1.73042	down
Ipmk	1.73449	0.794513	1.73449	down
Adarb1	1.71606	0.779101	1.71606	down
Sbno2	1.62573	0.701085	1.62573	down
Tcp11l2	1.59362	0.67231	1.59362	down
Gnptab	1.54718	0.629639	1.54718	down
Slc17a8	2.98655	1.57848	2.98655	down
Tmtc2	2.54932	1.35011	2.54932	down
Irak3	1.55221	0.634326	1.55221	down
Hmga2	2.68001	1.42224	2.68001	down
Avil	2.0447	1.03189	2.0447	down
Itga7	2.04174	1.0298	2.04174	down
Smtn	1.84097	0.880464	1.84097	down
Gm11946	1.90555	0.930206	1.90555	down
Lif	4.30812	2.10706	4.30812	down
Nsg2	2.86848	1.52028	2.86848	down
Rnf145	1.59338	0.672092	1.59338	down
Timd2	2.69485	1.43021	2.69485	down
Tcf7	2.77467	1.47232	2.77467	down
A630014C17Rik	2.84869	1.5103	2.84869	down
Il4	2.66136	1.41217	2.66136	down
Il5	1.51825	0.602405	1.51825	down
Pdlim4	1.56367	0.644934	1.56367	down
Fam83g	2.91772	1.54484	2.91772	down
Specc1	2.51741	1.33194	2.51741	down
Hs3st3b1	2.0322	1.02304	2.0322	down
Sco1	1.52632	0.610058	1.52632	down
Myh3	4.22393	2.07859	4.22393	down
Gas7	2.4981	1.32083	2.4981	down
Pik3r5	1.85514	0.891527	1.85514	down
Serpinf1	3.20699	1.68122	3.20699	down
Fam101b	2.54734	1.34899	2.54734	down
Slc6a4	93.6528	6.54925	93.6528	down
Ssh2	1.95789	0.969299	1.95789	down
Arl5c	1.68078	0.749129	1.68078	down
Ccr7	1.71906	0.781619	1.71906	down
Cntnap1	1.9528	0.965547	1.9528	down
Grn	1.76572	0.820257	1.76572	down
Map3k14	1.55628	0.638102	1.55628	down
Pitpnc1	1.65916	0.730457	1.65916	down
Axin2	1.59062	0.669586	1.59062	down
Slc16a6	1.84693	0.885127	1.84693	down
Fam20a	3.31068	1.72713	3.31068	down
Slc16a5	7.99189	2.99854	7.99189	down
Gm11735	6.95537	2.79813	6.95537	down
St6galnac1	7.16841	2.84165	7.16841	down
Sec14l1	1.65861	0.729976	1.65861	down
Tha1	2.08321	1.05881	2.08321	down
Socs3	2.47095	1.30507	2.47095	down
Sgsh	1.56597	0.647052	1.56597	down
Slc26a11	3.79298	1.92333	3.79298	down
0610009L18Rik	1.75556	0.811931	1.75556	down
Mafg	2.00122	1.00088	2.00122	down
AL663030.1	3.42187	1.77478	3.42187	down
Metrnl	2.27319	1.18472	2.27319	down
Trib2	1.62593	0.701269	1.62593	down
Grhl1	1.67861	0.747266	1.67861	down
Rnf144a	1.80809	0.854464	1.80809	down
Ahr	1.55521	0.63711	1.55521	down
Baz1a	1.52517	0.608974	1.52517	down
2700097O09Rik	1.68423	0.752092	1.68423	down
Gm527	1.75421	0.810818	1.75421	down
Frmd6	1.61825	0.694435	1.61825	down
Syne2	1.67287	0.742327	1.67287	down
Gm7862	1.63918	0.712975	1.63918	down
Actn1	2.26132	1.17717	2.26132	down
Fam164c	1.87675	0.908238	1.87675	down
Tgfb3	6.82776	2.77141	6.82776	down
Ston2	1.80285	0.850277	1.80285	down
Rps6ka5	1.98337	0.987955	1.98337	down
Lgmn	4.41342	2.1419	4.41342	down
Vrk1	1.5397	0.622652	1.5397	down
Cdc42bpb	1.50457	0.589354	1.50457	down
Akr1c18	11.4103	3.51226	11.4103	down
Lyst	1.62644	0.701714	1.62644	down
Prss16	1.64909	0.721668	1.64909	down
Fam65b	1.539	0.621995	1.539	down
Gm11346	2.10083	1.07096	2.10083	down
Tubb2a	1.79191	0.8415	1.79191	down
Pxdc1	10.2809	3.3619	10.2809	down
Rreb1	1.55706	0.638823	1.55706	down
Mylip	2.18817	1.12972	2.18817	down
Unc5a	1.69981	0.765374	1.69981	down
Pcsk1	5.13247	2.35965	5.13247	down
Glrx	1.68237	0.750494	1.68237	down
F2rl1	1.72741	0.78861	1.72741	down
F2r	2.18146	1.12529	2.18146	down
F2rl2	2.1548	1.10755	2.1548	down
Sgtb	2.6768	1.42051	2.6768	down
Zswim6	1.50607	0.590787	1.50607	down
Pde4d	1.64886	0.72147	1.64886	down
Dnase1l3	2.2368	1.16143	2.2368	down
Nr1d2	1.70333	0.768362	1.70333	down
Kcnk5	1.59367	0.672353	1.59367	down
Stab1	1.82377	0.866923	1.82377	down
Rnase4	4.1262	2.04481	4.1262	down
Ang	3.36963	1.75259	3.36963	down
Trav14-1	1.65819	0.729606	1.65819	down
Slc7a8	3.6365	1.86255	3.6365	down
Nynrin	8.35933	3.06339	8.35933	down
AC098877.1	6.4607	2.69169	6.4607	down
Spata13	1.55632	0.638135	1.55632	down
Tnfrsf19	5.12319	2.35704	5.12319	down
Wdfy2	1.65249	0.724642	1.65249	down
Siah3	1.84779	0.885802	1.84779	down
Tbc1d4	1.92157	0.942284	1.92157	down
AC102815.1	3.13554	1.64871	3.13554	down
Kctd12	3.13051	1.6464	3.13051	down
Rap2a	1.81174	0.85738	1.81174	down
Gpr18	1.9068	0.931151	1.9068	down
Gpr183	1.73746	0.796976	1.73746	down
Sepp1	1.55563	0.637499	1.55563	down
Laptm4b	1.68278	0.750851	1.68278	down
Matn2	7.78154	2.96006	7.78154	down
Sntb1	1.73703	0.796621	1.73703	down
Tmem65	1.79004	0.839988	1.79004	down
Lrrc6	2.09006	1.06354	2.09006	down
Cacna1i	2.2128	1.14587	2.2128	down
Amigo2	2.09537	1.0672	2.09537	down
Rapgef3	1.77537	0.828123	1.77537	down
Vdr	2.76948	1.46961	2.76948	down
Pou6f1	2.34066	1.22691	2.34066	down
Abcc5	1.72557	0.787076	1.72557	down
St6gal1	1.80155	0.849236	1.80155	down
Sidt1	1.58754	0.666797	1.58754	down
Plcxd2	1.80863	0.854896	1.80863	down
Trat1	1.53081	0.614292	1.53081	down
St3gal6	1.73582	0.795617	1.73582	down
Gcfc1	1.62341	0.69903	1.62341	down
4931406G06Rik	2.14942	1.10395	2.14942	down
4932438H23Rik	2.60999	1.38404	2.60999	down
Ifngr2	2.2963	1.19931	2.2963	down
Hmgn1	1.54597	0.628509	1.54597	down
Zscan10	4.09968	2.03551	4.09968	down
Tnfrsf12a	1.61841	0.694577	1.61841	down
Nme4	2.03691	1.02639	2.03691	down
Rgs11	1.71225	0.775892	1.71225	down
Itfg3	1.53848	0.621509	1.53848	down
Gm15318	10.0489	3.32897	10.0489	down
Ddr1	2.13979	1.09747	2.13979	down
Ehd3	3.15805	1.65903	3.15805	down
Prkd3	1.87227	0.904788	1.87227	down
Bambi	1.52645	0.610178	1.52645	down
Taf4b	1.84182	0.881135	1.84182	down
Camk4	1.97073	0.978728	1.97073	down
Lrrtm2	2.08657	1.06114	2.08657	down
Gm15336	1.69421	0.760611	1.69421	down
Sh3rf2	2.03212	1.02299	2.03212	down
Snx2	2.44468	1.28965	2.44468	down
Gramd3	2.12483	1.08735	2.12483	down
Adrb2	1.67681	0.745715	1.67681	down
Lman1	1.55105	0.633245	1.55105	down
Rasgrp2	1.59455	0.673154	1.59455	down
Macrod1	1.52212	0.606084	1.52212	down
Tle4	1.55922	0.640821	1.55922	down
Gcnt1	1.58484	0.664339	1.58484	down
Trpm6	3.14531	1.6532	3.14531	down
Fam108b	1.83031	0.872089	1.83031	down
Tmem2	1.89903	0.92526	1.89903	down
Frat1	1.86595	0.899911	1.86595	down
Frat2	1.93336	0.95111	1.93336	down
Ubtd1	1.62139	0.697228	1.62139	down
Pi4k2a	1.55027	0.63252	1.55027	down
Avpi1	1.79767	0.846129	1.79767	down
Sh3pxd2a	2.06437	1.0457	2.06437	down
AC123702.1	2.15244	1.10597	2.15244	down
AC131756.1	1.53042	0.613928	1.53042	down
Atrnl1	1.53259	0.615968	1.53259	down
Nanos1	1.51539	0.599688	1.51539	down
Pim2	2.05264	1.03748	2.05264	down
Sh2d1a	2.75692	1.46306	2.75692	down
Gm14718	1.64072	0.714332	1.64072	down
Arhgef9	1.98679	0.990437	1.98679	down
Pja1	1.57746	0.657601	1.57746	down
Cysltr1	4.20906	2.0735	4.20906	down
Gm5127	2.56376	1.35826	2.56376	down
P2ry10	1.65405	0.726006	1.65405	down
Klhl4	11.3828	3.50878	11.3828	down
Armcx6	1.6029	0.680688	1.6029	down
Armcx2	1.50843	0.593051	1.50843	down

## Sheet: EAE_UP_141.txt
Gene Symbol	FC	Log FC	FC (abs)	Regulation KO vs WT
Stau2	-1.7003	-0.765791	1.7003	up
Dnahc7a	-1.85815	-0.893866	1.85815	up
Lamc2	-2.51456	-1.33031	2.51456	up
Sec16b	-2.20377	-1.13997	2.20377	up
Xcl1	-3.91613	-1.96943	3.91613	up
Pydc4	-1.52997	-0.613502	1.52997	up
Pyhin1	-1.66116	-0.732193	1.66116	up
Pydc3	-1.57647	-0.656694	1.57647	up
Ephx1	-2.32312	-1.21607	2.32312	up
St8sia6	-2.6717	-1.41776	2.6717	up
Galnt3	-2.59611	-1.37635	2.59611	up
Capn3	-1.82974	-0.871641	1.82974	up
Bambi-ps1	-1.62518	-0.700599	1.62518	up
Spef1	-1.58589	-0.665295	1.58589	up
Pard6b	-1.59422	-0.672847	1.59422	up
Mgst2	-1.5398	-0.622746	1.5398	up
Fcrl1	-1.72701	-0.788277	1.72701	up
Elovl6	-1.80786	-0.854287	1.80786	up
Nhedc2	-1.8628	-0.897474	1.8628	up
Ifi44	-3.50022	-1.80745	3.50022	up
Lyn	-1.7704	-0.824077	1.7704	up
Gm11802	-1.51482	-0.599147	1.51482	up
Atp6v0d2	-2.02074	-1.01489	2.02074	up
Fggy	-1.69522	-0.761471	1.69522	up
Itgb3bp	-1.54374	-0.626431	1.54374	up
Gm8879	-2.20004	-1.13753	2.20004	up
Actr3b	-2.7345	-1.45128	2.7345	up
Ccdc164	-3.71531	-1.89348	3.71531	up
Ablim2	-1.5424	-0.625179	1.5424	up
Oasl1	-2.08061	-1.057	2.08061	up
Oas2	-2.33444	-1.22308	2.33444	up
Oas1a	-1.76873	-0.822716	1.76873	up
Lat2	-1.74435	-0.80269	1.74435	up
Trip6	-1.71699	-0.77988	1.71699	up
Ica1	-1.75977	-0.815388	1.75977	up
Tpk1	-1.57624	-0.656488	1.57624	up
Chn2	-1.97146	-0.979262	1.97146	up
Actg2	-3.06679	-1.61673	3.06679	up
Klrd1	-2.63263	-1.3965	2.63263	up
Klrc2	-2.57861	-1.36659	2.57861	up
Klri2	-1.68253	-0.750628	1.68253	up
Klra5	-7.93752	-2.98869	7.93752	up
Bicd1	-2.02909	-1.02083	2.02909	up
Pglyrp1	-1.55073	-0.632946	1.55073	up
Bcam	-2.06108	-1.0434	2.06108	up
Zfp607	-1.77179	-0.82521	1.77179	up
Siglec5	-1.83697	-0.877327	1.83697	up
Trpm1	-1.57482	-0.655187	1.57482	up
Arrdc4	-1.80264	-0.850113	1.80264	up
Fam174b	-3.01357	-1.59147	3.01357	up
Sh3gl3	-3.12656	-1.64458	3.12656	up
Art2a-ps	-1.54929	-0.631605	1.54929	up
Art2b	-1.8383	-0.878371	1.8383	up
Trim30d	-1.88168	-0.912025	1.88168	up
Apbb1	-1.68461	-0.752416	1.68461	up
Dkk3	-2.63998	-1.40052	2.63998	up
Rras2	-1.68994	-0.756973	1.68994	up
Inpp5a	-1.58654	-0.665883	1.58654	up
Ifitm1	-1.94042	-0.956371	1.94042	up
Cttn	-1.64705	-0.719884	1.64705	up
Fam129c	-1.61536	-0.691859	1.61536	up
Bbs2	-1.63445	-0.708806	1.63445	up
Zfp612	-2.04154	-1.02966	2.04154	up
Mlkl	-1.53003	-0.613562	1.53003	up
Folr4	-2.05558	-1.03954	2.05558	up
Amica1	-2.26057	-1.17669	2.26057	up
Dapk2	-2.32469	-1.21704	2.32469	up
C2cd4b	-2.0867	-1.06122	2.0867	up
Ddx43	-2.00316	-1.00228	2.00316	up
Filip1	-3.24479	-1.69813	3.24479	up
Myo6	-1.52824	-0.611867	1.52824	up
Fam46a	-1.65494	-0.726775	1.65494	up
Scn11a	-2.17222	-1.11917	2.17222	up
Txlnb	-1.57375	-0.654204	1.57375	up
Samd3	-2.8395	-1.50563	2.8395	up
Scml4	-1.5912	-0.670112	1.5912	up
Prf1	-2.03438	-1.02459	2.03438	up
2010107G23Rik	-1.53524	-0.618466	1.53524	up
Zfp365	-3.23125	-1.69209	3.23125	up
Csrp2	-1.90696	-0.931276	1.90696	up
Msrb3	-1.89074	-0.918954	1.89074	up
Gm11973	-3.71473	-1.89326	3.71473	up
Fam161a	-1.94132	-0.95704	1.94132	up
6330403K07Rik	-1.65426	-0.726183	1.65426	up
Nlrp1b	-1.87431	-0.906362	1.87431	up
Itgae	-3.32472	-1.73323	3.32472	up
Tmem132e	-10.6854	-3.41757	10.6854	up
Slfn8	-1.57206	-0.652653	1.57206	up
AA465934	-1.74817	-0.805842	1.74817	up
Ccl3	-1.81998	-0.863923	1.81998	up
Ccl4	-1.97454	-0.981513	1.97454	up
Krt222	-1.93172	-0.949889	1.93172	up
Rgs9	-1.90429	-0.929254	1.90429	up
Cd7	-2.09359	-1.06598	2.09359	up
Gm10330	-1.56292	-0.644245	1.56292	up
Rsad2	-2.03222	-1.02306	2.03222	up
Jdp2	-1.78102	-0.832707	1.78102	up
Ttc8	-1.77776	-0.830063	1.77776	up
Ifi27l2a	-2.05882	-1.04182	2.05882	up
Tmem121	-1.79642	-0.845126	1.79642	up
Ighm	-1.90095	-0.926719	1.90095	up
Tcrg-C2	-2.80858	-1.48984	2.80858	up
Aldh5a1	-2.3566	-1.23671	2.3566	up
Nrn1	-2.59468	-1.37556	2.59468	up
Zfp456	-1.73689	-0.796508	1.73689	up
Gpx8	-3.18688	-1.67214	3.18688	up
Gzma	-5.30404	-2.40709	5.30404	up
Itga1	-2.19245	-1.13255	2.19245	up
Thrb	-3.7447	-1.90485	3.7447	up
1810011H11Rik	-3.06728	-1.61696	3.06728	up
Rpgrip1	-1.57861	-0.658651	1.57861	up
Gzmc	-2.28545	-1.19248	2.28545	up
Gzmb	-2.15137	-1.10525	2.15137	up
Gm6907	-1.75526	-0.811682	1.75526	up
Atp8a2	-1.90538	-0.930077	1.90538	up
Enpp2	-3.3115	-1.72748	3.3115	up
Ly6c2	-1.83078	-0.872456	1.83078	up
Apol10b	-2.09636	-1.06789	2.09636	up
Cd200r4	-2.18551	-1.12797	2.18551	up
Epha3	-1.62389	-0.699455	1.62389	up
Itsn1	-1.6386	-0.712467	1.6386	up
Mx1	-1.95201	-0.964963	1.95201	up
H2-Ob	-1.77104	-0.824597	1.77104	up
Enpp5	-2.21953	-1.15025	2.21953	up
Epcam	-2.60551	-1.38156	2.60551	up
Cables1	-2.39647	-1.26091	2.39647	up
Gm4841	-1.67181	-0.741413	1.67181	up
Slc14a1	-1.7194	-0.781906	1.7194	up
Ifit3	-2.05936	-1.0422	2.05936	up
Gm14446	-2.06218	-1.04417	2.06218	up
I830012O16Rik	-2.31404	-1.21041	2.31404	up
Ifit1	-1.7521	-0.809085	1.7521	up
O3far1	-2.57768	-1.36608	2.57768	up
4930524L23Rik	-1.66883	-0.73884	1.66883	up
Foxp3	-1.63772	-0.711687	1.63772	up
Gm14703	-1.69259	-0.759235	1.69259	up
Ncrna00086	-4.18464	-2.0651	4.18464	up
Fgf13	-1.55917	-0.640777	1.55917	up
Tktl1	-2.37895	-1.25033	2.37895	up
Zcchc18	-1.72147	-0.783639	1.72147	up
Gpm6b	-1.7685	-0.822525	1.7685	up

## Sheet: EAE_DOWN_124.txt
Gene Symbol	FC	Log FC	FC (abs)	Regulation KO vs WT
Il17a	3.215	1.68482	3.215	down
Il1r2	1.94119	0.956943	1.94119	down
Il10	2.37264	1.24649	2.37264	down
B3galt2	2.91109	1.54156	2.91109	down
Batf3	2.14948	1.10399	2.14948	down
Npdc1	1.98387	0.988316	1.98387	down
Ptges	3.08173	1.62374	3.08173	down
Angptl2	3.21879	1.68652	3.21879	down
Zeb2	1.56984	0.650616	1.56984	down
Acvr2a	2.12053	1.08443	2.12053	down
Ermn	2.07203	1.05104	2.07203	down
Itpka	5.85422	2.54948	5.85422	down
Mal	3.53657	1.82235	3.53657	down
Slc4a11	2.28767	1.19388	2.28767	down
Smox	2.49717	1.3203	2.49717	down
Srxn1	1.52311	0.607019	1.52311	down
Mcts2	1.83534	0.876045	1.83534	down
Mmp9	5.06095	2.33941	5.06095	down
Etohi1	1.64545	0.718484	1.64545	down
AC140312.1	2.96576	1.5684	2.96576	down
Rorc	2.76101	1.46519	2.76101	down
Lingo4	3.94286	1.97924	3.94286	down
Tdrkh	1.90252	0.927908	1.90252	down
Plekho1	2.42678	1.27905	2.42678	down
Tspan2	2.20235	1.13905	2.20235	down
Cnn3	2.43769	1.28552	2.43769	down
Nfkb1	1.60939	0.686515	1.60939	down
Tspan5	1.63041	0.705236	1.63041	down
Lmo4	2.36963	1.24466	2.36963	down
St6galnac3	1.65589	0.727603	1.65589	down
Aqp3	2.08387	1.05927	2.08387	down
Tnfsf8	1.77749	0.829838	1.77749	down
Tctex1d1	1.66041	0.731544	1.66041	down
BB031773	2.00871	1.00627	2.00871	down
4933424M12Rik	1.90244	0.927853	1.90244	down
Btbd19	1.72077	0.783057	1.72077	down
Plk3	2.27392	1.18518	2.27392	down
Cited4	2.29353	1.19757	2.29353	down
Adc	1.81158	0.857251	1.81158	down
Dhrs3	1.63974	0.713464	1.63974	down
Espn	1.55511	0.637015	1.55511	down
Samd11	4.1506	2.05332	4.1506	down
Spon2	6.70879	2.74605	6.70879	down
Igfbp7	2.11948	1.08371	2.11948	down
AC123795.1	3.55654	1.83048	3.55654	down
Stx1a	1.67596	0.744984	1.67596	down
Il23r	2.15882	1.11025	2.15882	down
Mgll	2.04337	1.03095	2.04337	down
Magi1	2.43327	1.2829	2.43327	down
Il17re	2.25761	1.17479	2.25761	down
Hpn	3.22312	1.68846	3.22312	down
Arnt2	51.3187	5.68141	51.3187	down
Nupr1	3.07842	1.62219	3.07842	down
Adam8	1.81563	0.860469	1.81563	down
Cd163l1	2.61022	1.38417	2.61022	down
5830411N06Rik	3.81613	1.93211	3.81613	down
Zfp941	1.74521	0.803397	1.74521	down
AC129082.1	2.34127	1.22729	2.34127	down
2210011C24Rik	2.6723	1.41808	2.6723	down
Podnl1	4.16461	2.05818	4.16461	down
Maf	101.188	6.66089	101.188	down
Ccdc15	1.55169	0.633845	1.55169	down
Usp2	1.60772	0.685013	1.60772	down
Anp32a	2.1689	1.11696	2.1689	down
Acpp	1.59796	0.676228	1.59796	down
Ccr1	3.55638	1.83041	3.55638	down
Ppp1r14c	6.85624	2.77742	6.85624	down
Ptprk	2.46255	1.30015	2.46255	down
Pkib	1.8107	0.856546	1.8107	down
Ggt5	1.74561	0.803727	1.74561	down
Kcnmb4	1.73807	0.797487	1.73807	down
4933400F03Rik	2.1434	1.0999	2.1434	down
Hormad2	2.89724	1.53468	2.89724	down
Gm12169	57.0355	5.83379	57.0355	down
Slc22a4	2.15863	1.11011	2.15863	down
Serpinf1	2.91877	1.54536	2.91877	down
Tmigd1	2.11713	1.08211	2.11713	down
Hlf	2.44523	1.28997	2.44523	down
Chad	2.29774	1.20022	2.29774	down
Nr1d1	3.22088	1.68745	3.22088	down
1700028N14Rik	1.73718	0.796745	1.73718	down
2310007L24Rik	2.88543	1.52879	2.88543	down
Fam20a	1.79473	0.843769	1.79473	down
1700012B07Rik	1.99407	0.995715	1.99407	down
St6galnac1	2.45083	1.29327	2.45083	down
Timp2	2.275	1.18587	2.275	down
Grhl1	1.73945	0.798629	1.73945	down
Gm527	1.88818	0.917	1.88818	down
Ston2	1.96644	0.975585	1.96644	down
Ckb	1.84016	0.879833	1.84016	down
Inhba	3.57995	1.83994	3.57995	down
Epdr1	1.89289	0.920591	1.89289	down
Pxdc1	3.48585	1.80151	3.48585	down
Ccdc90a	1.52076	0.604793	1.52076	down
Rbm24	11.2433	3.491	11.2433	down
Cap2	2.85072	1.51133	2.85072	down
Pcsk1	1.87468	0.906648	1.87468	down
Fam159b	1.50309	0.58793	1.50309	down
Rnase4	6.93934	2.7948	6.93934	down
Ltb4r1	2.08027	1.05677	2.08027	down
Laptm4b	2.34675	1.23067	2.34675	down
Mtss1	1.55014	0.632399	1.55014	down
Vdr	5.28954	2.40314	5.28954	down
Dgkg	3.46417	1.79251	3.46417	down
4931406G06Rik	1.90565	0.930282	1.90565	down
Ifngr2	1.74711	0.80497	1.74711	down
Mmp25	2.77669	1.47337	2.77669	down
Cyp4f16	2.13131	1.09174	2.13131	down
Zfp799	1.59995	0.678029	1.59995	down
Ehd3	1.67223	0.741775	1.67223	down
Fam82a1	1.77601	0.828639	1.77601	down
Ttc39c	1.50797	0.592603	1.50797	down
Snx2	1.63273	0.707288	1.63273	down
March3	1.63253	0.707106	1.63253	down
Ablim3	1.82503	0.867919	1.82503	down
Hsbp1l1	2.29341	1.1975	2.29341	down
Pqlc1	1.67581	0.74486	1.67581	down
Zdhhc24	1.51574	0.60002	1.51574	down
Cdc42ep2	6.35717	2.66839	6.35717	down
Rcor2	2.16673	1.11552	2.16673	down
Slc15a3	1.74499	0.803218	1.74499	down
Gda	3.82251	1.93452	3.82251	down
Avpi1	2.10655	1.07488	2.10655	down
Cysltr1	1.82817	0.870398	1.82817	down

## Sheet: Venn all
All_MAL_2235	All_HDM_677	EAE_111_all	All_MAL_HDM_29	All_MAL_EAE_55	All_HDM_EAE_51	All_MAL_HDM_EAE_48
Gm6104	Sulf1	Il1r2	Ogfrl1	Stau2	Il17a	Il10
Pcmtd1	Il17f	Sec16b	Arid5a	Pydc3	Dnahc7a	Pydc4
AC103380.1	Khdc1b	Xcl1	2010300C02Rik	Ephx1	B3galt2	St8sia6
Gm15452	Dst	Batf3	Ica1l	Angptl2	Lamc2	Acvr2a
Mybl1	AC127433.1	Npdc1	Icos	Capn3	Pyhin1	Bambi-ps1
Gm6195	AC161534.1	Ptges	AL645646.1	Etohi1	Ermn	Smox
Prex2	Col3a1	Zeb2	Tmbim1	Mgst2	Galnt3	Mmp9
AC136316.1	Col5a2	Itpka	Acsl3	Fcrl1	Rorc	AC140312.1
Mcm3	Stat4	Mal	Fam124b	Cnn3	Tdrkh	Plekho1
Gm7846	AC161493.1	Slc4a11	Phlda3	Elovl6	Nhedc2	Tspan2
Gm10307	Aox3	Spef1	Cacna1s	Lyn	Ifi44	Tspan5
Prim2	Fzd7	Srxn1	Zfp281	Atp6v0d2	Igfbp7	Lmo4
Arhgef4	Bmpr2	Mcts2	Prg4	Aqp3	AC123795.1	Samd11
Hs6st1	Mtap2	Pard6b	Lamc1	Tnfsf8	Oas1a	Stx1a
Neurl3	Igfbp5	Lingo4	Rgs16	Espn	Ica1	Pglyrp1
Fer1l5	Pnkd	Nfkb1	Mnda	Ccdc164	Actg2	Trpm1
Cnnm4	Des	St6galnac3	Sccpdh	Ablim2	Magi1	Arrdc4
Ankrd23	Scg2	Gm11802	Lamb3	Oasl1	Bicd1	Arnt2
Cox5b	Serpine2	Fggy	Frmd4a	Oas2	Bcam	Adam8
Mgat4a	Gm15433	Itgb3bp	Optn	Trip6	Siglec5	Podnl1
Tsga10	Gm7592	Tctex1d1	Gm13199	Chn2	Fam174b	Mlkl
Aff3	Col6a3	BB031773	Itih5	Klrd1	5830411N06Rik	Maf
Chst10	Rbm44	4933424M12Rik	Otud1	Klrc2	Cttn	Folr4
Il1r1	Tnfrsf11a	Btbd19	Nrarp	Zfp607	2210011C24Rik	Dapk2
Il1rl1	Tfcp2l1	Plk3	Stxbp1	Sh3gl3	Usp2	Myo6
Il18r1	Cd55	Cited4	Gsn	Trim30d	Filip1	Scml4
Tex30	Sox13	Adc	Neb	Apbb1	Ccr1	Itgae
Nabp1	Chi3l1	Dhrs3	Dapl1	Rras2	Ppp1r14c	Serpinf1
Pgap1	Ptprv	Gm8879	Dpp4	Fam46a	2010107G23Rik	Fam20a
Plcl1	5730559C18Rik	Actr3b	Ifih1	Acpp	6330403K07Rik	Grhl1
Sgol2	Camsap2	Spon2	Rapgef4	Txlnb	Nlrp1b	Ston2
Clk1	E330020D12Rik	Lat2	Gpr155	Samd3	Tmem132e	Ckb
Tmem237	Rgs8	Tpk1	Ttc30a1	Pkib	Slfn8	Ighm
Carf	Pbx1	Il23r	Slc43a1	Prf1	St6galnac1	Nrn1
Nbeal1	Slamf1	Mgll	Gm9821	Zfp365	Gm527	Rnase4
Cyp20a1	Atp1a2	Il17re	Abtb2	Ggt5	Aldh5a1	Gzmc
Raph1	Slamf8	Klri2	Prrg4	Kcnmb4	Pxdc1	Laptm4b
Ctla4	Gm4955	Klra5	Prnp	Hlf	Pcsk1	Apol10b
Klf7	BC094916	Hpn	Tasp1	Timp2	Gpx8	Ifngr2
2810408I11Rik	Cnst	Art2a-ps	Cst7	Cd7	1810011H11Rik	Mx1
Plekhm3	Gm5069	Art2b	Trib3	Rsad2	Enpp2	Cyp4f16
Idh1	Prox1	Dkk3	Bmp7	Tcrg-C2	Vdr	Enpp5
Pikfyve	Fam171a1	Nupr1	Zbtb46	Ccdc90a	4931406G06Rik	Ehd3
Kansl1l	4930412O13Rik	Inpp5a	Zbtb10	Gzma	Hsbp1l1	Snx2
Acadl	9230102O04Rik	Cd163l1	Tnfsf10	Itga1	I830012O16Rik	Gm4841
Ikzf2	C630004M23RIK	Zfp941	Il21	Rpgrip1	O3far1	Slc15a3
Bard1	Prkcq	Ifitm1	Mbnl1	Ly6c2	Avpi1	Gm14446
Rqcd1	Etl4	AC129082.1	Rapgef2	Cd200r4	Foxp3	Gpm6b
Tuba4a	Rnf208	Fam129c	Gucy1b3	Zfp799	Ncrna00086
Dnajb2	Fut7	Bbs2	Fhdc1	H2-Ob	Cysltr1
Utp14b	Ralgds	Zfp612	Mex3a	Ttc39c	Zcchc18
Wdfy1	Usp20	Ccdc15	Il6ra	Slc14a1
A630001G21Rik	Lcn2	Amica1	Ecm1	Pqlc1
Psmd1	Hc	Anp32a	Gm12474	Ifit3
Armc9	AI182371	C2cd4b	Igsf3	Ifit1
Ptma	Rnd3	Ddx43	Fam19a3
Sh3bp4	1700057H21Rik	Scn11a	Vcam1
Ramp1	Rbm43	Ptprk	Prss12
Per2	Tnfaip6	Csrp2	Slc39a8
Asb1	Arl5a	4933400F03Rik	Penk
Hdac4	Gm13546	Msrb3	2610301B20Rik
Hdac4	Tanc1	Hormad2	Gem
Gpc1	Gca	Gm11973	Tmem64
Pask	B3galt1	Fam161a	Bach2
Hdlbp	Ttn	Gm12169	BC024582
AC111074.1	Ube2e3	Slc22a4	Ankrd6
Bcl2	Fam171b	Tmigd1	Mob3b
Dsel	Ctnnd1	AA465934	Ptpn3
Mgat5	Serping1	Ccl3	Ugcg
Tmem163	Ube2l6	Ccl4	Gm12543
Zranb3	Chrm4	Chad	Bspry
Mcm6	Creb3l1	Nr1d1	Tle1
Gm15790	Gyltl1b	Krt222	Raver2
Gm15674	Pex16	1700028N14Rik	Ptprf
Pfkfb2	1700029I15Rik	2310007L24Rik	C77080
Ikbke	Mapk8ip1	Rgs9	Smpdl3b
Fam72a	Syt13	1700012B07Rik	Aim1l
Ctse	Prr5l	Gm10330	Padi2
Slc41a1	Gpr176	Jdp2	Cdk6
Nucks1	Spint1	Ttc8	Rundc3b
Elk4	Pla2g4f	Ifi27l2a	Rnf32
Mfsd4	Tgm7	Tmem121	Hopx
Nuak2	Mtap1a	Inhba	Adamts3
Dstyk	Ckmt1	Epdr1	Antxr2
Pik3c2b	Frmd5	Rbm24	Aff1
Kdm5b	Sema6d	Cap2	Gbp11
Ube2t	Nphp1	Zfp456	Tgfbr3
Gm4204	Acoxl	Fam159b	A630023P12Rik
Timm17a	Bcl2l11	Thrb	Ulk1
Csrp1	Gfra4	Ltb4r1	2900026A02Rik
Kif14	Adam33	Gzmb	Ksr2
Dennd1b	Jag1	Gm6907	Nos1
Aspm	Slc52a3	Atp8a2	Tesc
Uchl5	8430427H17Rik	Mtss1	Hip1
Rgs2	Necab3	Dgkg	Zan
Gm15583	Ggt7	Epha3	Adap1
Gm15443	9830001H06Rik	Itsn1	Pon3
Fam129a	Lpin3	Mmp25	Gimap7
1700025G04Rik	Gm11454	Fam82a1	2410066E13Rik
Gm15428	Pabpc1l	Epcam	Gadd45a
Mrps14	Gm11455	Cables1	Vamp5
Rabgap1l	Slc13a3	2003-03-01	Foxp1
Zbtb37	Bcas1	Ablim3	Plxnd1
Fasl	Edn3	Zdhhc24	Mical3
BC055324	9030418K01Rik	Cdc42ep2	Klrb1f
Sell	Lama5	Rcor2	Klrk1
Atp1b1	Pag1	Gda	St8sia1
Gm16550	Chmp4c	4930524L23Rik	Ehd2
Dcaf6	Cp	Gm14703	Axl
Pogk	Gm12534	Fgf13	Fbxo17
Uck2	Postn	Tktl1	Lgals7
Tmco1	Pfn2		Tmem149
Nuf2	Mme		Zbtb32
Uap1	Gm18588		Lsr
Slamf7	Ppm1l		AC149055.1
Cd48	Fnip2		Nkg7
Cd84	Fam160a1		Lmtk3
Gm10521	Ntrk1		Nav2
Slamf6	Lenep		Peg12
Igsf8	She		Chsy1
Tagln2	Slc27a3		AC127595.1
Ifi204	Tdpoz4		Lrrk1
Fh1	Sema6c		Pde8a
Chml	Mcl1		Swap70
Exo1	Gm20628		Sbf2
Zfp238	Cd160		Pik3c2a
Adss	Cd101		Il4ra
Desi2	Ptgfrn		Tacc2
Adck3	Olfml3		Stk32c
Itpkb	Bcl2l15		B4galnt4
Tmem63a	Chia		Tnfrsf26
2210411M09Rik	Kcna2		Tnfrsf23
Lbr	Gstm5		2610019F03Rik
Degs1	5330417C22Rik		Kbtbd11
Susd4	S1pr1		Ces2c
Dusp10	Gm9889		Ddx28
Cenpf	F3		Snai3
Smyd2	Enpep		Cpne7
Rps6kc1	Cyp2u1		Irf2bp2
Nsl1	Gbp7		Gpr83
D730003I15Rik	Cyr61		Angptl6
Dtl	Mcoln3		Pde4a
Ints7	A830012C17Rik		St14
Lpgat1	Asph		Slc37a2
Nek2	Cdh17		Nrgn
Irf6	B4galt1		Cxcr5
Plxna2	Tesk1		Phldb1
Suv39h2	Col15a1		Pou2af1
Sephs1	D630039A03Rik		Exph5
Mcm10	Rgs3		Coro2b
Nudt5	Col27a1		Lysmd2
Usp6nl	Cntln		Slc9a9
7SK	Pde4b		Plxnb1
Gm13217	Wdr78		Ccr8
Pfkfb3	Fam151a		Vipr1
Il2ra	Echdc2		Tmem42
Fam188a	Gpx7		Ccr2
Trdmt1	Osbpl9		Myb
Vim	Pdzk1ip1		Spock2
4930426L09Rik	Pik3r3		Cdh23
Arhgap21	Slc6a9		4632428N05Rik
Gad2	D130007C19Rik		Ipmk
Pdss1	Maneal		Atcay
Mastl	5730409E04Rik		Chst11
Zmynd19	Tlr12		Tcp11l2
Pnpla7	Col16a1		Gm872
Tubb4b	Tinagl1		Irak3
Dpp7	Cd52		Itga7
2010317E24Rik	Ubxn11		Smtn
Nacc2	Slc30a2		Lif
Card9	Hspg2		Slc1a4
AL732311.1	Camk2n1		Lgalsl
Lcn4	Nbl1		Nsg2
Surf4	Padi4		Tcf7
Slc2a6	Gm13032		A630014C17Rik
Gtf3c5	Fblim1		Il4
Gm13394	Gm13081		Pdlim4
Slc27a4	Gm13154		Fam83g
Cercam	Trp73		Specc1
Odf2	Hgf		Gsg2
Zer1	Pion		Fam101b
Ccbl1	Il6		Ssh2
Qrfp	Emilin1		Gm11532
St6galnac6	Slc30a3		Arl5c
Ttc16	Hgfac		Ccr7
Ptrh1	Sh3tc1		Jup
Fam129b	Ppp2r2c		Grn
Ralgps1	Jakmip1		Map3k14
Fam125b	Cc2d2a		Cyb561
Pbx3	Cd38		Pitpnc1
Hspa5	Gpr125		Axin2
Stom	Sod3		Slc16a5
Dab2ip	Slc34a2		Sec14l1
Nek6	Tbc1d19		Tha1
Wdr38	Klf3		Sgsh
Scai	Rbm47		Slc26a11
Gm13461	Nsun7		Mafg
Kif5c	Limch1		Metrnl
Lypd6b	Txk		Rnf144a
Gm13493	C530008M17Rik		Ahr
Wdsub1	Spink2		Sostdc1
Baz2b	Afm		Dock4
Spc25	Rassf6		2700097O09Rik
Gorasp2	Cxcl15		AC108401.2
Hat1	Cxcl1		Tgfb3
Metap1d	Areg		Lgmn
Pdk1	Bmp2k		Vrk1
Gm13634	Rasgef1b		Lrrc16a
BB114351	Agpat9		Gpld1
Cdca7	Sparcl1		Tubb2a
Sp9	Pkd2		Rreb1
Cir1	Gbp10		Dsp
Gm13704	Asphd2		Mylip
Lnp	Vsig10		Unc5a
Nfe2l2	Gm9754		Rasgrf2
Gm13669	Rph3a		F2rl1
Prkra	Ppp1cc		F2rl2
Sestd1	Hvcn1		Sgtb
Itga4	Vps37b		Adamts6
Nup35	Abcb9		Zswim6
Gm4735	Gpr133		Dnase1l3
Calcrl	Gtf2ird1		Nr1d2
2700094K13Rik	Eln		Nid2
Ypel4	Hspb1		Kcnk5
Slc43a3	Gpr146		Vcl
Ssrp1	Zfand2a		Il17rb
Tnks1bp1	Slc29a4		Colq
Nup160	Fscn1		4930431P03Rik
Gm13772	2210417A02Rik		Rec8
Slc39a13	Col1a2		Phf11
Ckap5	Pdk4		Wdfy2
Phf21a	AC113309.1		Egr3
Trp53i11	Smo		Tbc1d4
Apip	Cald1		AC102815.1
Qser1	Dgki		Kctd12
Kif18a	Trbv5		Gpr183
Ccdc34	AC153851.2		Sepp1
Aven	Epha1		Rai14
Ryr3	Fam115a		Matn2
Arhgap11a	Arhgef5		Sntb1
Bub1b	Sspo		Tg
Pak6	Atp6v0e2		Wisp1
Plcb2	9530036M11Rik		Arhgap39
D2Ertd750e	Prdm5		C1qtnf6
Casc5	Sftpb		Gm10863
Rad51	Rtkn		Pdgfb
Oip5	Slc4a5		Tnfrsf13c
Nusap1	Fbxo41		Lrrk2
Tyro3	1700019G17Rik		Amigo2
Ehd4	Tgfa		Pou6f1
Ttbk2	Antxr1		Tenc1
Pdia3	Hdac11		Litaf
Shf	Pdzrn3		Abcc5
Gm14085	Srgap3		St6gal1
Slc30a4	Pparg		Trat1
Sqrdl	2510049J12Rik		Alcam
Slc24a5	Il17ra		St3gal6
Dut	Mical3		Gcfc1
Eid1	Usp18		Zscan10
Gm17555	C1ra		Tnfrsf12a
Atp8b4	C1s		Nme4
Gm10774	Gm20531		Rgs11
Ncaph	Leprel2		Itfg3
Dusp2	Bcl2l14		Lta
Zfp661	Emp1		Ddr1
Bub1	Mgp		Ebi3
Gm14005	Tm7sf3		Bambi
4933427J07Rik	Ppfibp1		Taf4b
Ttl	Prkcg		1700066B19Rik
Ckap2l	Lair1		Lman1
Stk35	Dmwd		Impa2
Cdc25b	Ceacam16		Ctif
Pcna	Zfp93		Npas4
Gpcpd1	Grik5		Ctsw
Mcm8	Pou2f2		Rasgrp2
Rrbp1	Megf8		Macrod1
Rbbp9	Tmem91		Trpm6
Insm1	Ltbp4		Tmem2
Gzf1	Pak4		Tjp2
Gm14130	Zfp14		Insl6
Zfp120	Slc7a10		Pdcd1lg2
Zfp937	Lrp3		Pik3ap1
Gm10749	Zfp536		Frat2
3300002I08Rik	Kcnc3		Ubtd1
Zfp442	Prrg2		Sh3pxd2a
Acss1	Plekha4		Nanos1
Gins1	Grin2d		Kcnd1
Gm14150	Tmem86a		Pim2
Sdcbp2	Isg20		Gpr34
Fam110a	Pex11a		Sh2d1a
Zcchc3	Fah		Gm14718
Tpx2	Kctd14		Pcyt1b
E2f1	Ints4		Armcx6
Sla2	Capn5		Armcx2
Gm14278	Neu3		Gprasp2
Gm14276	P4ha3		Car5b
Dsn1	Arhgef17		Tlr7
Rpn2	P2ry2
Src	Spon1
Blcap	Pde3b
Tgm2	Calca
Lbp	Dctpp1
Fam83d	Itgad
Plcg1	Chst15
Chd6	Kndc1
Mybl2	Tnfsf13b
Tox2	Mcf2l
Pkig	Rasa3
Ada	Plat
Slpi	Fut10
Sdc4	Rbpms
Pigt	D8Ertd82e
Ube2c	Wwc2
Pltp	Palld
Cd40	Large
Eya2	Cacna1a
Sulf2	Dand5
Prex1	Mmp2
Cse1l	Kifc3
B4galt5	Cdh1
Fam65c	Ldhd
Atp9a	Tmem231
Zfp217	Wwox
Gm14270	Gm20388
2010011I20Rik	Crispld2
Aurka	Zcchc14
Cass4	Galnt2
Spo11	1810008B01Rik
Ppp4r1l-ps	Gm15775
Stx16	Pcnxl2
Slmo2	Pard3
Zfp831	Nrp1
Gm14443	Endod1
Gm14440	4931406C07Rik
Gm4631	Olfm2
Gm8923	Col5a3
Gm8898	mmu-mir-1900
Gm14296	Icam5
Gm14420	Cdkn2d
Gm14325	Ap1m2
BX284639.1	Pvrl1
Zfp931	Mpzl2
Ss18l1	Scn4b
Slco4a1	Dscaml1
Gm14340	Bco2
9230112E08Rik	Il18
Col20a1	Cryab
Znf512b	Fdx1
Tcea2	Kdelc2
Pcmtd2	Cib2
Polr3k	AC165246.1
Hey1	Loxl1
Mrps28	Lrrc49
Tpd52	Foxb1
Fabp5	Fam81a
Car2	Myo1e
Gm5844	Myo5c
Gm10259	Gnb5
Ect2	Gclc
Gpr160	Cd109
Gm9791	Col12a1
Ccdc144b	Irak1bp1
Ccna2	Hmgn3
4932438A13Rik	Me1
Spry1	1190002N15Rik
Plk4	Ky
Mgarp	Col6a5
AC102860.1	Hyal2
Maml3	Klhdc8b
Dclk1	Kif9
P2ry14	Ccrl2
Slc33a1	Ulk4
AC116732.1	Cdcp1
Gmps	Xcr1
Mlf1	Ccr5
4930579G24Rik	Fbxo30
Gucy1a3	Ifngr1
D930015E06Rik	Gm15270
Trim2	Akap7
Dclk2	Slc16a10
Arhgef11	Mettl24
Lrrc71	Chst3
Pear1	Aifm2
Iqgap3	Susd2
Pmf1	Gm20441
Ssr2	Gstt3
Syt11	Gstt1
Ash1l	Col6a2
Hcn3	Col6a1
Gm16069	Adarb1
Krtcap2	Kiss1r
Cks1b	Sbno2
1700094D03Rik	Gipc3
Rps27	Celf5
Ilf2	Dram1
S100a9	Gnptab
S100a10	Slc17a8
Prune	Amdhd1
Ctss	Ccdc38
Gm129	Dcn
Anp32e	Cep290
Sv2a	Tmtc2
Gm15441	Hmga2
Txnip	Avil
Itga10	Myl6b
Acp6	Ikzf4
Bcl9	Suox
Prkab2	Gm11946
Phgdh	Dusp18
Hsd3b2	Grb10
Gm12428	Cobl
Ttf2	Stc2
Atp1a1	Rhbdf1
Sike1	Atp10b
Ampd1	Rnf145
Dclre1b	Nipal4
Ppm1j	Timd2
Ddx20	Il5
Chi3l7	Sparc
2010016I18Rik	Mfap4
Dennd2d	Hs3st3b1
Kcna3	Sco1
AI504432	Myh3
Csf1	Myh13
Gm12500	Gas7
Gpsm2	Pik3r5
Slc25a24	Gucy2e
Rtcd1	Tm4sf5
Sass6	Nlrp1a
Arhgap29	Xaf1
Pde5a	Slc6a4
Usp53	Pipox
Sec24d	Tmem98
AC113287.1	Ccl1
Camk2d	Slfn9
Larp7	Slfn10-ps
4930422G04Rik	Rnf43
Gar1	Bzrap1
Ostc	Col1a1
Lef1	Samd14
Hadh	Hoxb4
Npnt	Sp6
Gstcd	Gpr179
Cenpe	Zpbp2
Bank1	Dhx58
Ppp3ca	Kcnh4
Gm17316	Tubg2
H2afz	Cntnap1
Dapp1	Mrc2
Gbp1	Ccdc46
Gbp2	Slc16a6
Ccbl2	Kif19a
Odf2l	Btbd17
Cryz	Gprc5c
Lrrc40	Fads6
Depdc1a	Sphk1
Wls	Gm11735
Tox	Socs3
Chd7	Ccdc40
Trp53inp1	0610009L18Rik
Ccne2	AL663030.1
Rad54b	Sdc1
Fsbp	Wdr35
Rbm12b2	Trib2
Cpne3	Cmpk2
Fam82b	Slc26a4
Ggh	Ispd
Coq3	Scin
Mms22l	Coch
Gm11914	Akap6
Mdn1	Baz1a
Gabrr2	Frmd6
Srsf12	Syne2
Zfp292	Gm7862
3110043O21Rik	Actn1
Sigmar1	Fam164c
B230312A22Rik	Vash1
Tmem8b	Rps6ka5
Reck	Unc79
Glipr2	Ppp4r4
Gm12504	D430019H16Rik
Melk	Cdc42bpb
Fbxo10	AC160982.1
Hemgn	Vipr2
Anp32b	Akr1c18
Nans	Lyst
Gm16731	Amph
Coro2a	Prss16
Tbc1d2	Fam65b
Smc2	Gm11346
Abca1	Edn1
Txn1	Ogn
Susd1	Glrx
Snx30	F2r
Gm12567	Naip5
Gm12573	Naip6
Alad	2610204G07Rik
Pole3	Pde4d
Whrn	Gm10044
Gm11223	Zfp503
Megf9	Zcchc24
Ccdc171	Gm10395
Haus6	D14Ertd449e
Acer2	Gm9746
5830433M19Rik	Chdh
Jun	Stab1
Nfia	Ogdhl
Inadl	Sftpa1
Usp1	Sftpd
Alg6	Ang
E130102H24Rik	Sall2
Hspb11	Trav14-1
Tmem48	Trdv1
Orc1	Jub
Gm12743	Slc7a8
9630013D21Rik	Adcy4
9130206I24Rik	Nynrin
Stil	AC098877.1
Cyp4x1	Gjb2
Mob3c	Spata13
Rad54l	Tnfrsf19
Ipp	Sftpc
Ccdc17	Lgi3
Nasp	Cysltr2
Toe1	Siah3
Mutyh	Rap2a
Eif2b3	Gpr18
Kif2c	C7
Hyi	Capsl
Cdc20	Fer1l6
Ebna1bp2	Tmem65
Gm12856	Lrrc6
Ermap	Fam83h
Lepre1	Slc39a4
Ppih	Apol9b
Ccdc30	Apol7b
Hivep3	Apol7e
Ctps	Apol9a
Mfsd2a	Kdelr3
Macf1	Cacna1i
Mycbp	Fam109b
Fhl3	Ldoc1l
Cdca8	Slc2a13
9930104L06Rik	Rapgef3
Eif2c3	AI836003
Clspn	Lalba
Zmym6	Lima1
Yars	AC161812.1
Dcdc2b	5430421N21Rik
Srsf4	Igfbp6
Rcc1	Nfe2
Atpif1	Adcy9
Gm12999	Glis2
Rpa2	Abat
Fgr	Tnp2
Nudc	Scarf2
Gpn2	2005-09-01
Ccdc21	Lamp3
Stmn1	Tctex1d2
Aunip	Muc4
Sepn1	Muc20
Man1c1	Lmln
D4Wsu53e	Mylk
Runx3	Ildr1
Clic4	Fbxo40
Ncmap	Cd80
Cnr2	Sidt1
Id3	Ccdc80
E2f2	Plcxd2
Ece1	Arl6
Ddost	4932438H23Rik
Pink1	Kcnj15
Mrto4	Hmgn1
Iffo2	Dscam
RP23-334I5.4	Bace2
Aldh4a1	Ripk4
Efhd2	Tiam2
Vps13d	AC122821.2
Gm13232	Prss41
AL627077.2	Prss30
Gm13237	Tead3
Gm13140	Gm15318
Gm13135	Tff1
Mthfr	Tmprss3
Srm	Zfp870
Apitd1	Angptl4
Kif1b	Btnl4
Slc25a33	Btnl5
Spsb1	Btnl6
Eno1	Tnxb
Rere	C2
Gm13092	Hspa1l
Errfi1	Gm10501
Per3	Ly6g5b
Kcnab2	Tnf
A430005L14Rik	Ptk7
Tnfrsf14	AI661453
Prkcz	AC154235.1
Mib2	C3
B930041F14Rik	Lclat1
Mrpl20	Sult6b1
Agrn	Prkd3
Isg15	Pkdcc
AW011738	Plekhh2
2310042D19Rik	Dync2li1
Plekhn1	Slc3a1
Gtpbp10	Socs5
Adam22	Ston1
Gm10108	9430020K01Rik
Fgl2	Colec12
Fam185a	Camk4
AC137938.1	Reep2
Mll3	Lrrtm2
Xrcc2	Arap3
Paxip1	Gm15336
Lmbr1	Sh3rf2
Tyms	Dpysl3
Ept1	Ppic
Cenpa	Gramd3
Mapre3	Pdgfrb
Cad	Adrb2
Ppm1g	Alpk2
Krtcap3	Rab27b
Ift172	Acy3
Ywhah	BC021614
4933407H18Rik	Spnb3
Slbp	Cst6
Tacc3	Efemp2
Whsc1	Ltbp3
Mxd4	Plcb3
Zfyve28	A430093F15Rik
Fam193a	Tmem132a
Tnip2	Ms4a6c
Grk4	Tle4
Afap1	Gna14
Crmp1	Gcnt1
Lyar	Fam108b
Slc2a9	Mamdc2
Lap3	Il33
Ncapg	Gldc
Gm10025	Frat1
Pi4k2b	Pi4k2a
Rell1	Scd1
RP24-448C16.2	Lzts2
Tlr1	Calhm2
Tmem156	AC123702.1
Klhl5	Gpam
Wdr19	Tectb
Rhoh	AC131756.1
Nfxl1	Atrnl1
Usp46	4930506M07Rik
Ppat	Cybb
Paics	Syn1
Gm15830	Gpc3
Igj	Bgn
Afp	Slc6a8
Uso1	Pdzd4
Cxcl10	Pls3
2011-09-01	Dmd
Mrpl1	Gspt2
Plac8	Spin4
Hpse	Arhgef9
Ptpn13	Pja1
Hsd17b11	Zdhhc15
BC005561	Magee2
AC123687.1	Fgf16
Zfp951	Gm5127
Gbp8	P2ry10
Gbp9	Sh3bgrl
Lrrc8b	Klhl4
Lrrc8c	Arxes2
Cdc7	Tceal8
Brdt	Bex1
A830010M20Rik	Tceal3
Idua	Mid2
Plcxd1	Fgd1
Pole	Egfl6
Galnt9
Ttc28
Wscd2
Ung
Mmab
Mvk
Oasl2
Srsf9
Cox6a1
Cit
Pebp1
Rfc5
Aldh2
Acad10
Sh2b3
Fam109a
Pptc7
Atp2a2
P2rx7
Camkk2
Anapc5
A930024E05Rik
Tmem120b
Wdr66
Kntc1
Hip1r
Pitpnm2
Cdk2ap1
Setd8
Snrnp35
Tmed2
Gm17132
Gm17131
Ran
Tpst1
Gm15920
Ncf1
Rfc2
Wbscr27
Tbl2
Rhbdd2
Por
Slc12a9
Gigyf1
Zkscan1
Mcm7
BC037034
Got2-ps1
Heatr2
Sun1
Mad1l1
Nudt1
Eif3b
Chst12
Lfng
Ttyh3
Zfp12
Kdelr2
Cyth3
Ankrd61
Aimp2
Ccz1
Tecpr1
Gm15708
Pdap1
Zkscan14
Gtf3a
Lnx2
Pan3
Gm8615
B3galtl
Brca2
N4bp2l1
Rfc3
Samd9l
Asns
Rpa3
Glcci1
Gm16042
Fam3c
Slc13a1
Snd1
Ube2h
Tmem209
AB041803
Tmem140
Nup205
Ubn2
AC124762.1
Jhdm1d
Slc37a3
Trbv13-3
Trbv20
Trbv23
Trbv26
Gstk1
Ezh2
Pdia4
Zfp783
Krba1
Ccdc126
Mpp6
Osbpl3
Cycs
Cbx3
Ggct
Gars
Aqp1
Lsm5
Metazoa_SRP
Lancl2
Hpgds
Mad2l1
E230016M11Rik
Gm8566
Igkc
Eif2ak3
Rnf103
Usp39
Capg
Gm9008
Hk2
Mthfd2
Tet3
Sfxn5
AC158662.2
Anxa4
Arhgap25
Rpn1
Sec61a1
Mcm2
Txnrd3
Slc41a3
Nup210
Lsm3
Lrig1
AC122929.1
0610040F04Rik
Gm17055
Bhlhe40
Rad18
AC153591.1
Ttll3
Fancd2
Tmcc1
Gm20404
Zfand4
Cacna2d4
Klrg1
A330044P14Rik
Grcc10
Atn1
Lrrc23
Tpi1
Cdca3
Acrbp
Lpar5
Ncapd2
Vamp1
Cd27
Rad51ap1
D6Wsu163e
Ccnd2
Foxm1
Gm5884
Klrb1c
BC064078
Clec2d
AC142191.1
Gabarapl1
Klrc1
Magohb
Csda
Crebl2
Cdkn1b
Atf7ip
Ldhb
Bcat1
Gm15706
Bhlhe41
Itpr2
Klhdc5
Myadm
Tmc4
Leng9
Tmem238
Ube2s
Nat14
Zfp579
Vmn1r58
Vmn1r65
Zfp667
Zfp28
Zfp773
Zfp418
Zfp551
Zscan18
Lig1
Meis3
Ptgir
Hif3a
Apoe
Gm16184
Igsf23
Plaur
Atp1a3
D930028M14Rik
Bckdha
Cyp2s1
AC119211.2
Egln2
Snrpa
Blvrb
1700049G17Rik
Dyrk1b
Timm50
Plekhg2
Zfp36
Rasgrp4
Fam98c
Yif1b
Zfp420
Wdr62
Hcst
Aplp1
Arhgap33
Hspb6
Haus5
Ffar2
Gramd1a
Gm12763
Gm12764
Cebpa
C230052I12Rik
Ccdc123
Dpy19l3
Ccne1
Pop4
Zfp619
Gm5593
Gm5595
Etfb
Vsig10l
Pold1
Napsa
Zfp473
Nup62
Ptov1
Rras
Fcgrt
Dkkl1
Tulp2
Ppp1r15a
Dbp
Sult2b1
Tmem143
Emp3
Saal1
E2f8
Fancf
Gas2
Tarsl2
Snrpa1
Vimp
Igf1r
Pgpep1l
Ntrk3
Fanci
Ticrr
Zfp710
Sema4b
Prc1
Blm
Crtc3
Zscan2
Fsd2
Tmc3
Il16
Gm20413
Ctsc
4632434I11Rik
Usp35
Alg8
AC119880.1
Arrb1
Spcs2
Rnf169
Pold3
Fam168a
Fchsd2
Stard10
3200002M19Rik
Tomt
Il18bp
Rrm1
Olfr613
Trim34a
Trim12a
Gm4759
Akip1
Dennd5a
Tmem41b
Wee1
Ampd3
Mical2
Plekha7
Nucb2
Arl6ip1
Smg1
Coq7
Ccp110
Gprc5b
Cdr2
Plk1
Lcmt1
Jmjd5
Sbk1
Ypel3
Tbx6
Hirip3
Sez6l2
Prrt2
Kif22
Sephs2
9130019O22Rik
Zfp629
Pycard
Itgam
Itgax
Tgfb1i1
Rgs10
Inpp5f
Gm5903
Btbd16
Plekha1
Acadsb
Bub3
Mki67
Mgmt
Mapk1ip1
Bnip3
Pwwp2b
Tubgcp2
Paox
Ifitm2
Ifitm3
1600016N20Rik
Lrdd
Tspan4
Ifitm10
Ctsd
Lsp1
Cars
Tnfrsf22
Insr
Zfp358
Cd209c
Evi5l
Shcbp1
Efnb2
Irs2
Lamp1
Tfdp1
Grk1
Mcph1
Xkr5
AC148089.1
Ckap2
Vdac3
Ap3m2
Gins4
Ppapdc1b
Rnf122
Tex15
Ubxn8
Gsr
Tmem66
Dusp4
Eri1
Zdhhc2
Mlf1ip
Casp3
Dctd
Spcs3
Hmgb2
AC163097.1
2700029M09Rik
Ddx60
Sc4mol
Gm10660
D130040H23Rik
Zfp963
Zfp866
Slc25a42
Ifi30
Haus8
Use1
Ankle1
Slc27a1
Glt25d1
Unc13a
Tpm4
Klf2
F2rl3
Mcm5
Rbmxl1
Inpp4b
Ddx39
Asf1b
Palm3
Il27ra
Zswim4
Nfix
Calr
Syce2
Orc6
Neto2
Siah1a
Chd9
Mt3
Mt2
Mt1
Nup93
Ccdc102a
Gpr114
Zfp319
Gins3
Gm5913
Gm15210
Hsf4
Elmo3
Slc9a5
Zdhhc1
Enkd1
Ranbp10
Nutf2
Dus2l
AC134615.1
Nfat5
St3gal2
Aars
Rfwd3
Znrf1
Zfp1
2310061C15Rik
Cenpn
Mphosph6
Hsdl1
Dnaaf1
Gins2
Klhdc4
Slc7a5
Cyba
Cdt1
Fanca
Afg3l1
Rab4a
Nup133
Mmp12
Sesn3
BC017612
Fbxl12
A230050P20Rik
Dnmt1
S1pr2
Tmed1
AB124611
Ldlr
Spc24
Dock6
Zfp599
Anln
Dpy19l1
St3gal4
Tirap
Chek1
Stt3a
Vwa5a
Thy1
Rnf26
C2cd2l
Dpagt1
H2afx
Hmbs
Hyou1
Zbtb16
Usp28
Sdhd
Rdx
Gm16124
Idh3a
Acsbg1
Dnaja4
Etfa
C230081A13Rik
Snx33
Neil1
1700017B05Rik
Cox5a
Hexa
Parp6
Senp8
Myo9a
Kif23
Zwilch
Uchl4
Tipin
Dennd4a
Parp16
Pif1
2810417H13Rik
Fbxl22
Rps27l
Vps13c
Rora
Anxa2
Ccnb2
Aqp9
BC031353
Myo5a
Leo1
7SK
AC159313.1
Mb21d1
Slc17a5
Sh3bgrl2
Ttk
Bckdhb
Dopey1
Rwdd2a
Nt5e
Zfp949
Gm5620
Chst2
BC043934
Acpl2
AC121121.1
Slc25a36
Gm16185
Mrps22
Ryk
Rab6b
Topbp1
Nphp3
Poc1a
Abhd14b
Parp3
Manf
Traip
Rnf123
Dag1
1700102P08Rik
Impdh2
Prkar2a
Pfkfb4
Ccdc51
Nme6
Cdc25a
Elp6
Nradd
Tmie
Als2cl
Cmtm7
Gm9846
Eomes
Itga9
Vill
Abhd5
Kif15
Mthfd1l
Syne1
Fbxo5
Ipcef1
Cnksr3
Ulbp1
Lrp11
Nup43
Gm9797
Utrn
Plagl1
Phactr2
Hivep2
Ccdc28a
Nhsl1
Map3k5
Mtap7
Fam54a
AC153556.1
E030030I06Rik
RP23-58L22.8
L3mbtl3
Gm10145
Cenpw
Fam26f
Dse
Hdac2
Marcks
Tube1
Gm16364
Rpf2
Sesn1
Prep
Lilrb4
Smpdl3a
Ccdc138
Sowahc
P4ha1
Ddit4
Adamts14
Ppa1
Srgn
Dna2
Arid5b
Cdk1
Gm5778
Ggt1
Gm5134
Slc5a4b
Prmt2
Pcbp3
Slc19a1
Sumo3
Ube2g2
Icosl
Gm9978
2610008E11Rik
Ppap2c
Cdc34
Gzmm
Bsg
Hcn2
Palm
Arid3a
Dos
Izumo4
Sf3a2
Lmnb2
Gadd45b
Thop1
Zfr2
Matk
Tjp3
Fzr1
Ankrd24
AC153939.1
Txnrd1
1500009L16Rik
Ckap4
Btbd11
Hsp90b1
Nt5dc3
Parpbp
Nup37
Chpt1
Tmpo
Nedd1
Snrpf
Ndufa12
Nudt4
Eea1
Btg1
E2f7
Nap1l1
Phlda1
5330438D12Rik
Nup107
Mdm1
Tbc1d30
Gns
Ctdsp2
Tsfm
Mettl1
2009-03-01
Dtx3
Mars
Shmt2
Rdh1
Rdh16
Prim1
Atp5b
Timeless
Stat2
Esyt1
Pa2g4
Rdh5
Bloc1s1
Tespa1
Pisd-ps1
Sfi1
Pik3ip1
Tcn2
Mtfp1
Ccdc157
Nefh
Kremen1
Znrf3
Xbp1
Pold2
Myo1g
Nacad
Ramp3
Gm11991
Hus1
4930512M02Rik
Fignl1
2810442I21Rik
Fbxo48
Plek
Ehbp1
Zrsr1
0610010F05Rik
Snrnp25
Ccdc99
Rars
Hmmr
Nudcd2
A230004M16Rik
Thg1l
Adam19
Gm16033
Fam71b
AL669948.1
Havcr2
Tgtp1
Tgtp2
Rnf130
3010026O09Rik
Canx
Grm6
Agxt2l2
Hnrnpab
Nhp2
N4bp3
0610009B22Rik
AL935177.3
Aff4
Rad50
Gm17334
P4ha2
Rapgef6
Anxa6
G3bp1
Mrpl22
Igtp
Irgm2
2810021J22Rik
Flcn
Rasd1
Tom1l2
Shmt1
Map2k3
Tnfrsf13b
Cenpv
2410006H16Rik
Ntn1
Pfas
Ctc1
Aurkb
Tmem107
Cd68
Zbtb4
Eif5a
Dlg4
0610010K14Rik
Pelp1
Rnf167
C1qbp
Fam64a
Camkk1
Rap1gap2
Hic1
Mir22hg
Slc43a2
Ywhae
4932415L08RIK
Gemin4
Cpd
Gm12346
Gm12734
Dhrs13
Spag5
Aldoc
Tmem97
Suz12
Atad5
Cdk5r1
Myo1d
Slfn5
Slfn1
Slfn3
Tada2a
Znhit3
Usp32
Brip1
4632419I22Rik
Tubd1
Ypel2
Prr11
Ska2
Gm11491
Rad51c
A430104N18Rik
Cuedc1
Msi2
Akap1
Mmd
Nme1
Lrrc59
Eme1
Pdk2
Slc35b1
Abi3
Gngt2
Cbx1
Tbx21
Tbkbp1
Cisd3
Cacnb1
Fbxl20
Gm11632
Grb7
Thra
Cdc6
Top2a
Igfbp4
Atp6v0a1
Psmc3ip
Tubg1
Ezh1
AARSD1
Aarsd1
Vat1
Brca1
Tmem106a
Rdm1
Arl4d
Tmem101
BC030867
Rundc3a
Kif18b
Hexim2
Myl4
Tanc2
Ern1
Tex2
Pecam1
Gm11707
Kpna2
Gm11714
Psmd12
Gm11696
Arsg
Ttyh2
Rab37
Gm11695
Nup85
Rnf157
Rhbdf2
Tk1
Birc5
Dnahc17
Cyth1
Card14
Rnf213
Mrpl12
Slc25a10
P4hb
Arhgdia
Alyref
Hmga1-rs1
Narf
Gm6682
Mfsd2b
Rhob
Gen1
Ddx1
Fam84a
Pqlc3
Pdia6
Hpcal1
Gm10480
Asap2
Rrm2
Hbp1
CT572998.1
Tspan13
Bzw2
AC157213.1
Arhgap5
Egln3
1700047I17Rik2
Mis18bp1
Lrr1
Mgat2
Dnaaf2
Pole2
Tmx1
3110056K07Rik
Daam1
Mthfd1
Plekhg3
Spnb1
Eif2s1
Rdh12
Rad51l1
Zfp36l1
AC108401.1
Erh
Map3k9
C130039O16Rik
Gm5436
Aldh6a1
Fos
2310044G17Rik
Cep128
Gpr65
Eml5
Tdp1
Psmc1
Calm1
Cpsf2
RP23-377G8.3
Asb2
Otub2
Serpina3f
4831426I19Rik
Evl
Degs2
Begain
Hsp90aa1
Cinp
Ppp1r13b
Inf2
Siva1
Akt1
Pld4
Jag2
Crip1
4930427A07Rik
Ighg1
Ncapg2
Rapgef5
Cdca7l
Dnahc11
Itgb8
Asb13
Akr1e1
Adarb2
Gpr137b
Zscan12
Zfp187
Hist1h4i
Hist1h2bj
Hist1h1d
Hist1h2bc
Hist1h1c
Gmnn
Prl8a1
Dusp22
Gmds
Wrnip1
Serpinb1a
Serpinb6b
Serpinb9
Nqo2
Txndc5
BC024659
Tbc1d7
Gfod1
Cd83
Jarid2
5033430I15Rik
C78339
Kif13a
Dek
Zfp169
Cenpp
Cks2
Syk
Sfxn1
Thoc3
Arl10
Mxd3
Lman2
Golm1
Dapk1
4930486L24Rik
Ctla2b
Ctla2a
Ptch1
Zfp367
Ctsl
Zfp369
Zfp708
Zfp458
Zfp459
Zfp874a
Zfp874b
Tert
Slc12a7
Trip13
Brd9
Tppp
Cep72
Ankrd32
Arrdc3
Rasa1
Ssbp2
Dhfr
Fam151b
Serinc5
Jmy
Arsb
Scamp1
Wdr41
Sv2c
Gm6169
Hexb
Enc1
Fcho2
AC132347.1
Mccc2
Serf1
Ccdc125
Cenph
Ccnb1
Mast4
Cenpk
Ipo11
Apoo-ps
Ndufaf2
Depdc1b
Ankrd55
Il6st
Gzmk
Pelo
Parp8
Emb
Gm9752
Gm3636
Abhd6
Kctd6
Dnajc9
Usp54
Ap3m1
Myst4
Zmiz1
Anxa11
Cacna1d
Tkt
Nt5dc2
Nisch
Sh3bp5
Wdfy4
5730469M10Rik
Gm8113
Ptger2
Cdkn3
Gch1
Wdhd1
Lgals3
Dlgap5
AC163653.3
Trav6n-6
Trav14n-3
AC161872.5
Trav14-2
Trav8-2
Abhd4
Zfhx2
AC154731.1
Pspc1
Zmym5
Lats2
Ska3
Gm4902
Kpna3
Trim13
Rnaseh2b
Neil2
Zfp395
Esco2
Bnip3l
Gm20667
Cdca2
Dock5
Rhobtb2
Reep4
Lpar6
Tsc22d1
Lacc1
Dnajc15
Tnfsf11
Dgkh
Mtrf1
Gm5465
Diap3
Bora
Uchl3
4921525B02Rik
Dzip1
Mbnl2
Ipo5
Clybl
AW549877
Gm16077
Card6
Gm2245
Rictor
Nup155
Skp2
Il7r
Spef2
Tars
Pdzd2
Basp1
Myo10
Fam134b
Trio
Pgcp
Pop1
Spag1
Rnf19a
Ankrd46
Ncald
Nudcd1
Rad21
Med30
Ext1
Dscc1
Mtbp
Zhx2
Atad2
Fbxo32
Asap1
Gm2991
Col22a1
Ptk2
Slc45a4
Arc
4930572J05Rik
Pycrl
Zfp623
Gpaa1
Adck5
Tonsl
Kifc2
Recql4
Ncf4
Il2rb
Pdxp
Lgals1
Nol12
1700088E04Rik
Pla2g6
Maff
Cbx7
Tnrc6b
Tef
Tob2
Pmm1
Cenpm
Cyp2d22
5031439G07Rik
Fbln1
Ttc38
Gtse1
Cerk
Zbed4
Creld2
Hdac10
Mapk11
Fam116b
Lmf2
Arsa
Cntn1
Prickle1
Adcy6
Mll2
Tuba1b
Tuba1a
Tuba1c
Troap
Prpf40b
Nckap5l
Racgap1
Dip2b
Slc11a2
Gm20680
Galnt6
1810009N23Rik
Acvrl1
Acvr1b
Soat2
Itgb7
Espl1
Aaas
Calcoco1
Cbx5
Itga5
Pde1b
Vasn
Mgrn1
Rogdi
Carhsp1
Nubp1
Ciita
Snn
AC163630.1
Mcm4
Fgd4
2610318N02Rik
Sdf2l1
Gm15648
Tmem191c
Car15
Ranbp1
Gnb1l
Cdc45
Mrpl40
Klhl6
Klhl24
Alg3
Fam131a
Clcn2
Dnajb11
Rfc4
B630019A10Rik
BC106179
Rtp4
Bcl6
Lpp
Fam43a
Umps
Ccdc14
Dirc2
Hspbap1
Polq
Tmem39a
Zbtb20
Zbtb20
Tigit
Zdhhc23
Cd200r3
Btla
C330027C09Rik
Cep97
Impg2
Filip1l
Dcbld2
Cpox
Mina
Crybg3
Gm9581
Pros1
Gm20469
Hspa13
Samsn1
Nrip1
D16Ertd472e
AC122837.1
App
Bach1
Tiam1
Mis18a
Gm15965
Ifnar2
RP23-190G10.4
A930006K02Rik
Gart
Slc5a3
Setd4
Cbr1
Chaf1b
Ttc3
AC171211.1
Gm15340
Brwd1
Mx2
Prdm15
Tfb1m
Zdhhc14
Synj2
Tulp4
Gm2792
Tmem181b-ps
Sytl3
Rps6ka2
Mrpl18
Prdm9
Rgmb
Zfp97
Zfp53
Pkmyt1
Paqr4
1600002H07Rik
Ccnf
Abca3
D330041H03Rik
Dnase1l2
Pgp
Pkd1
Hn1l
Baiap3
Chtf18
AC159277.1
Wdr90
Rab11fip3
Decr2
Mrpl28
Dusp1
A930001N09Rik
Kifc5b
Phf1
Hmga1
Pacsin1
Zfp523
Fkbp5
Cpne5
Mtch1
Dnahc8
Rsph1
[truncated: 236 more rows]

## Sheet: Venn up
Up_MAL_1173	Up_HDM_544	Up_EAE_78	Up_MAL_HDM_87	Up_MAL_EAE_16	Up_HDM_EAE_39	Up_MAL_HDM_EAE_8
Gm6104	Sulf1	Sec16b	Ogfrl1	Stau2	Dnahc7a	Pglyrp1
Gm15452	Dst	Xcl1	2010300C02Rik	Atp6v0d2	Lamc2	Trpm1
Mybl1	AC127433.1	Pydc3	Tmbim1	Ablim2	Pydc4	Mlkl
Gm6195	AC161534.1	Ephx1	Fam124b	Chn2	Pyhin1	Dapk2
Prex2	Col3a1	Capn3	Phlda3	Klrd1	St8sia6	Itgae
Mcm3	Col5a2	Bambi-ps1	Cacna1s	Klrc2	Galnt3	Nrn1
Gm7846	AC161493.1	Spef1	Lamc1	Apbb1	Nhedc2	Gzmc
Gm10307	Aox3	Pard6b	Rgs16	Rras2	Ifi44	Apol10b
Prim2	Fzd7	Mgst2	Mnda	Fam46a	Oas1a
Cnnm4	Bmpr2	Fcrl1	Lamb3	Samd3	Ica1
Cox5b	Mtap2	Elovl6	Optn	Prf1	Actg2
Mgat4a	Igfbp5	Lyn	Itih5	Cd7	Bicd1
Tsga10	Pnkd	Gm11802	Nrarp	Gzma	Bcam
Il1rl1	Des	Fggy	Ttc30a1	Itga1	Siglec5
Il18r1	Scg2	Itgb3bp	Cst7	Ly6c2	Arrdc4
Tex30	Serpine2	Gm8879	Zbtb46	Cd200r4	Fam174b
Nabp1	Gm15433	Actr3b	Tnfsf10		Cttn
Sgol2	Gm7592	Ccdc164	Mbnl1		Folr4
Tmem237	Col6a3	Oasl1	Fam19a3		Filip1
Cyp20a1	Rbm44	Oas2	Penk		2010107G23Rik
Raph1	Tnfrsf11a	Lat2	Gem		6330403K07Rik
2810408I11Rik	Tfcp2l1	Trip6	Ptpn3		Nlrp1b
Acadl	Sox13	Tpk1	Bspry		Tmem132e
Bard1	Chi3l1	Klri2	C77080		Slfn8
Rqcd1	5730559C18Rik	Klra5	Smpdl3b		Ighm
Tuba4a	E330020D12Rik	Zfp607	Aim1l		Aldh5a1
Psmd1	Rgs8	Sh3gl3	Padi2		Gpx8
Ptma	Pbx1	Art2a-ps	Hopx		1810011H11Rik
Sh3bp4	Atp1a2	Art2b	2900026A02Rik		Enpp2
Asb1	Slamf8	Trim30d	Nos1		Mx1
Gpc1	Gm4955	Dkk3	Hip1		Enpp5
Pask	BC094916	Inpp5a	Adap1		Gm4841
Hdlbp	Gm5069	Ifitm1	Pon3		Gm14446
Tmem163	Prox1	Fam129c	Gimap7		I830012O16Rik
Zranb3	Fam171a1	Bbs2	Ehd2		O3far1
Mcm6	Frmd4a	Zfp612	Axl		Foxp3
Gm15790	4930412O13Rik	Amica1	Lgals7		Ncrna00086
Fam72a	9230102O04Rik	C2cd4b	Zbtb32		Zcchc18
Nucks1	Etl4	Ddx43	Lsr		Gpm6b
Pik3c2b	Rnf208	Myo6	AC149055.1
Ube2t	Fut7	Scn11a	Nkg7
Gm4204	Ralgds	Txlnb	Lmtk3
Timm17a	Usp20	Scml4	Chsy1
Csrp1	Lcn2	Zfp365	Lrrk1
Kif14	Hc	Csrp2	Swap70
Dennd1b	AI182371	Msrb3	Tacc2
Aspm	Gsn	Gm11973	Stk32c
Uchl5	Rnd3	Fam161a	Snai3
Gm15583	1700057H21Rik	AA465934	Pde4a
Fam129a	Rbm43	Ccl3	St14
1700025G04Rik	Tnfaip6	Ccl4	Nrgn
Gm15428	Ifih1	Krt222	Phldb1
Mrps14	Gca	Rgs9	Exph5
Fasl	B3galt1	Gm10330	Lysmd2
BC055324	Ttn	Rsad2	Ccr8
Gm16550	Fam171b	Jdp2	Chst11
Pogk	Ctnnd1	Ttc8	Slc1a4
Uck2	Serping1	Ifi27l2a	Lgalsl
Tmco1	Ube2l6	Tmem121	Gsg2
Nuf2	Gm9821	Tcrg-C2	Cyb561
Uap1	Creb3l1	Zfp456	Lrrc16a
Slamf7	Gyltl1b	Thrb	Gpld1
Cd48	Pex16	Rpgrip1	Nid2
Igsf8	1700029I15Rik	Gzmb	Vcl
Tagln2	Mapk8ip1	Gm6907	Phf11
Fh1	Prr5l	Atp8a2	Rai14
Chml	Gpr176	Epha3	Tg
Exo1	Spint1	Itsn1	Wisp1
Adss	Pla2g4f	H2-Ob	C1qtnf6
Desi2	Tgm7	Epcam	Pdgfb
Lbr	Mtap1a	Cables1	Tnfrsf13c
Degs1	Ckmt1	Slc14a1	Lrrk2
Cenpf	Sema6d	Ifit3	Tenc1
Smyd2	Nphp1	Ifit1	Litaf
Nsl1	Prnp	4930524L23Rik	Alcam
Dtl	Slc52a3	Gm14703	Ebi3
Ints7	8430427H17Rik	Fgf13	1700066B19Rik
Lpgat1	Necab3	Tktl1	Impa2
Nek2	Ggt7		Ctif
Suv39h2	9830001H06Rik		Ctsw
Sephs1	Lpin3		Slc15a3
Mcm10	Gm11454		Tjp2
Nudt5	Pabpc1l		Insl6
Gm13199	Slc13a3		Pdcd1lg2
Il2ra	Bcas1		Pik3ap1
Fam188a	Edn3		Pcyt1b
Trdmt1	Chmp4c		Car5b
Vim	Cp
Arhgap21	Postn
Pdss1	Pfn2
Mastl	Mme
Zmynd19	Gucy1b3
Tubb4b	Fhdc1
2010317E24Rik	Fam160a1
Lcn4	Ntrk1
Surf4	She
Gtf3c5	Slc27a3
Gm13394	Tdpoz4
Slc27a4	Cd160
Cercam	Cd101
Odf2	Ptgfrn
Ccbl1	Igsf3
Qrfp	Olfml3
St6galnac6	Bcl2l15
Fam129b	Chia
Pbx3	Gstm5
Hspa5	5330417C22Rik
Dab2ip	Vcam1
Nek6	F3
Wdr38	Enpep
Gm13461	Cyp2u1
Gm13493	Gbp7
Spc25	Cyr61
Gorasp2	Mcoln3
Hat1	A830012C17Rik
Cdca7	Asph
Lnp	2610301B20Rik
Gm13669	Cdh17
Sestd1	Tesk1
Itga4	Col15a1
Nup35	D630039A03Rik
Gm4735	Rgs3
2700094K13Rik	Col27a1
Slc43a3	Cntln
Ssrp1	Wdr78
Tnks1bp1	Echdc2
Nup160	Gpx7
Gm13772	Pdzk1ip1
Ckap5	Pik3r3
Trp53i11	Slc6a9
Apip	5730409E04Rik
Kif18a	Tinagl1
Ccdc34	Cd52
Aven	Ubxn11
Arhgap11a	Slc30a2
Bub1b	Hspg2
D2Ertd750e	Camk2n1
Casc5	Nbl1
Rad51	Gm13032
Oip5	Fblim1
Nusap1	Gm13081
Tyro3	Hgf
Ehd4	Pion
Pdia3	Emilin1
Slc30a4	Slc30a3
Slc24a5	Hgfac
Dut	Sh3tc1
Atp8b4	Ppp2r2c
Gm10774	Cc2d2a
Ncaph	Cd38
Dusp2	Gpr125
Bub1	Sod3
Gm14005	Slc34a2
Ttl	Tbc1d19
Ckap2l	Rbm47
Stk35	Nsun7
Cdc25b	Limch1
Pcna	C530008M17Rik
Mcm8	Spink2
Rrbp1	Igfbp7
Gm14130	Afm
Gins1	Rassf6
Gm14150	Cxcl15
Fam110a	Cxcl1
Zcchc3	Rasgef1b
Tpx2	Sparcl1
E2f1	Pkd2
Sla2	Gbp10
Gm14276	Asphd2
Dsn1	Vsig10
Rpn2	Ksr2
Fam83d	Gm9754
Mybl2	Rph3a
Pkig	Hvcn1
Ada	Gpr133
Pigt	Gtf2ird1
Ube2c	Eln
Sulf2	Hspb1
Prex1	Zan
Cse1l	Fscn1
B4galt5	2210417A02Rik
Gm14270	Col1a2
Aurka	Pdk4
Slmo2	AC113309.1
Slco4a1	Cald1
Polr3k	Dgki
Mrps28	Trbv5
Fabp5	AC153851.2
Gm5844	Epha1
Gm10259	Fam115a
Ect2	Arhgef5
Gpr160	Sspo
Gm9791	Atp6v0e2
Ccna2	9530036M11Rik
Plk4	Prdm5
Dclk1	Sftpb
Slc33a1	Rtkn
AC116732.1	Slc4a5
Gmps	Fbxo41
Mlf1	1700019G17Rik
4930579G24Rik	Tgfa
Dclk2	Antxr1
Iqgap3	Hdac11
Pmf1	Pdzrn3
Ssr2	Srgap3
Krtcap2	Pparg
Cks1b	2510049J12Rik
Ilf2	Mical3
S100a10	Mical3
Prune	Usp18
Anp32e	C1ra
Phgdh	C1s
Gm12428	Gm20531
Ttf2	Leprel2
Atp1a1	Bcl2l14
Tspan2	Mgp
Sike1	Ppfibp1
Dclre1b	Prkcg
Ppm1j	Ceacam16
Ddx20	Zfp93
Gm12500	Grik5
Gpsm2	Pou2f2
Slc25a24	Megf8
Rtcd1	Tmem91
Sass6	Ltbp4
Pde5a	Pak4
Sec24d	Zfp14
AC113287.1	Tmem149
Larp7	Slc7a10
4930422G04Rik	Lrp3
Gar1	Zfp536
Ostc	Kcnc3
Hadh	Prrg2
Npnt	Plekha4
Gstcd	Grin2d
Cenpe	Isg20
Ppp3ca	Pex11a
H2afz	Fah
Ccbl2	Kctd14
Odf2l	Ints4
Cryz	Capn5
Lrrc40	Neu3
Depdc1a	P4ha3
Chd7	Arhgef17
Ccne2	Spon1
Rad54b	Chst15
Fsbp	Kndc1
Ggh	Tnfsf13b
Coq3	Mcf2l
Mms22l	Plat
Gm11914	Fut10
Sigmar1	Rbpms
Reck	D8Ertd82e
Glipr2	Wwc2
Gm12504	Large
Melk	Cacna1a
Anp32b	Dand5
Nans	Mmp2
Coro2a	Kifc3
Tbc1d2	Ces2c
Smc2	Cdh1
Txn1	Tmem231
Alad	Wwox
Pole3	Crispld2
Gm11223	Pcnxl2
Megf9	Nrp1
Haus6	Endod1
5830433M19Rik	Gpr83
Usp1	4931406C07Rik
Alg6	Olfm2
Raver2	Col5a3
Tmem48	mmu-mir-1900
Orc1	Icam5
Gm12743	Dscaml1
9130206I24Rik	Bco2
Stil	Il18
Rad54l	Cryab
Ipp	Fdx1
Nasp	Kdelc2
Toe1	Cib2
Mutyh	AC165246.1
Eif2b3	Loxl1
Kif2c	Lrrc49
Cdc20	Fam81a
Ebna1bp2	Myo1e
Gm12856	Myo5c
Ppih	Gnb5
Ctps	Col12a1
Mfsd2a	Irak1bp1
Mycbp	Hmgn3
Cdca8	Me1
Clspn	Col6a5
Yars	Hyal2
Srsf4	Klhdc8b
Rcc1	Plxnb1
Atpif1	Kif9
Gm12999	Ccrl2
Rpa2	Ulk4
Fgr	Cdcp1
Nudc	Xcr1
Gpn2	Akap7
Ccdc21	Mettl24
Stmn1	Chst3
Aunip	Aifm2
Sepn1	Susd2
Man1c1	Gm20441
Runx3	Gstt3
Clic4	Gstt1
E2f2	Col6a2
Ddost	Col6a1
Mrto4	Kiss1r
Efhd2	Atcay
Gm13232	Gipc3
AL627077.2	Celf5
Gm13237	Dram1
Gm13140	Gm872
Gm13135	Amdhd1
Srm	Ccdc38
Apitd1	Dcn
Slc25a33	Cep290
Eno1	Myl6b
Gm13092	Ikzf4
Kcnab2	Suox
A430005L14Rik	Dusp18
Mrpl20	Grb10
Gtpbp10	Cobl
Adam22	Stc2
Gm10108	Rhbdf1
Fgl2	Atp10b
Fam185a	Nipal4
Xrcc2	Sparc
Paxip1	Mfap4
Tyms	Myh13
Ept1	Gucy2e
Cenpa	Tm4sf5
Cad	Nlrp1a
Ppm1g	Xaf1
Ywhah	Pipox
Slbp	Tmem98
Tacc3	Ccl1
Whsc1	Slfn9
Crmp1	Slfn10-ps
Lyar	Rnf43
Lap3	Bzrap1
Ncapg	Col1a1
Pi4k2b	Samd14
Rell1	Hoxb4
Nfxl1	Sp6
Usp46	Gm11532
Ppat	Gpr179
Paics	Zpbp2
Gm15830	Jup
Uso1	Dhx58
2011-09-01	Kcnh4
Mrpl1	Tubg2
Plac8	Mrc2
Hpse	Ccdc46
Lrrc8b	Kif19a
Lrrc8c	Btbd17
Cdc7	Gprc5c
Pole	Fads6
Wscd2	Sphk1
Ung	Ccdc40
Srsf9	Sdc1
Cox6a1	Wdr35
Cit	Cmpk2
Pebp1	Slc26a4
Rfc5	Sostdc1
Atp2a2	Ispd
Camkk2	Scin
Anapc5	Dock4
Kntc1	Coch
Hip1r	Akap6
Cdk2ap1	AC108401.2
Setd8	Vash1
Snrnp35	Unc79
Tmed2	Ppp4r4
Ran	D430019H16Rik
Tpst1	Ckb
Gm15920	AC160982.1
Ncf1	Vipr2
Rfc2	Amph
Tbl2	Dsp
Mcm7	Edn1
Got2-ps1	Ogn
Heatr2	Rasgrf2
Sun1	Naip5
Mad1l1	Naip6
Nudt1	Adamts6
Eif3b	2610204G07Rik
Chst12	Gm10044
Lfng	Zfp503
Kdelr2	Zcchc24
Aimp2	Gm10395
Ccz1	D14Ertd449e
Pdap1	Gm9746
Gtf3a	Il17rb
Gm8615	Chdh
B3galtl	Colq
Brca2	Ogdhl
Rfc3	Sftpa1
Asns	Sftpd
Rpa3	4930431P03Rik
Fam3c	Sall2
Snd1	Trdv1
Tmem209	Jub
Nup205	Rec8
AC124762.1	Adcy4
Ezh2	Gjb2
Pdia4	Egr3
Mpp6	Sftpc
Osbpl3	Lgi3
Cycs	Cysltr2
Cbx3	C7
Ggct	Capsl
Gars	Fer1l6
Lsm5	Fam83h
Lancl2	Slc39a4
Mad2l1	Arhgap39
Gm8566	Apol9b
Eif2ak3	Apol7b
Usp39	Apol7e
Capg	Apol9a
Gm9008	Gm10863
Hk2	Kdelr3
Mthfd2	Fam109b
Anxa4	Ldoc1l
Rpn1	Slc2a13
Sec61a1	AI836003
Mcm2	Lalba
Nup210	Lima1
Lsm3	AC161812.1
0610040F04Rik	5430421N21Rik
Gm17055	Igfbp6
Bhlhe40	Nfe2
Rad18	Adcy9
Fancd2	Glis2
Zfand4	Abat
Klrg1	Tnp2
Tpi1	Scarf2
Cdca3	2005-09-01
Lpar5	Lamp3
Ncapd2	Tctex1d2
Rad51ap1	Muc4
D6Wsu163e	Muc20
Foxm1	Lmln
BC064078	Mylk
Gabarapl1	Ildr1
Klrk1	Fbxo40
Klrc1	Cd80
Magohb	Ccdc80
Csda	Arl6
Bcat1	Kcnj15
Bhlhe41	Dscam
Myadm	Bace2
Tmem238	Ripk4
Ube2s	Tiam2
Lig1	AC122821.2
Ptgir	Prss41
D930028M14Rik	Prss30
Snrpa	Tead3
Timm50	Tff1
Yif1b	Tmprss3
Wdr62	Cyp4f16
Arhgap33	Zfp870
Hspb6	Angptl4
Haus5	Btnl4
C230052I12Rik	Btnl5
Ccdc123	Btnl6
Ccne1	Tnxb
Pop4	C2
Gm5593	Hspa1l
Etfb	Gm10501
Vsig10l	Ly6g5b
Pold1	Tnf
Napsa	Lta
Zfp473	Ptk7
Nup62	AI661453
Fcgrt	AC154235.1
Dkkl1	C3
Sult2b1	Lclat1
Tmem143	Sult6b1
Emp3	Pkdcc
Saal1	Plekhh2
E2f8	Dync2li1
Fancf	Slc3a1
Gas2	Socs5
Tarsl2	Ston1
Snrpa1	9430020K01Rik
Vimp	Colec12
Fanci	Reep2
Ticrr	Arap3
Prc1	Dpysl3
Blm	Ppic
Pde8a	Pdgfrb
Ctsc	Alpk2
4632434I11Rik	Rab27b
Alg8	Hsbp1l1
Spcs2	Acy3
Pold3	BC021614
3200002M19Rik	Spnb3
Tomt	Npas4
Rrm1	Cst6
Akip1	Efemp2
Dennd5a	Ltbp3
Tmem41b	Plcb3
Wee1	A430093F15Rik
Mical2	Tmem132a
Arl6ip1	Ms4a6c
Coq7	Gna14
Ccp110	Mamdc2
Cdr2	Il33
Plk1	Gldc
Lcmt1	Scd1
Jmjd5	Lzts2
Sbk1	Calhm2
Hirip3	Gpam
Kif22	Tectb
Sephs2	4930506M07Rik
Pycard	Kcnd1
Itgam	Cybb
Itgax	Gpr34
Gm5903	Syn1
Bub3	Gpc3
Mki67	Bgn
Pwwp2b	Slc6a8
Tubgcp2	Pdzd4
Paox	Pls3
Ifitm2	Dmd
Ifitm3	Gspt2
Lrdd	Spin4
Tspan4	Zdhhc15
Ifitm10	Magee2
Ctsd	Fgf16
Lsp1	Sh3bgrl
Cars	Gprasp2
Shcbp1	Arxes2
Tfdp1	Tceal8
Mcph1	Bex1
Xkr5	Tceal3
Ckap2	Mid2
Vdac3	Fgd1
Gins4	Egfl6
Ppapdc1b	Tlr7
Tex15
Ubxn8
Gsr
Dusp4
Eri1
Zdhhc2
Mlf1ip
Casp3
Dctd
Spcs3
Hmgb2
2700029M09Rik
Ifi30
Haus8
Ankle1
Glt25d1
Tpm4
F2rl3
Mcm5
Rbmxl1
Ddx39
Asf1b
Calr
Syce2
Orc6
Neto2
Mt3
Mt2
Mt1
Nup93
Gins3
Gm5913
Gm15210
Hsf4
Slc9a5
Enkd1
Nutf2
Aars
Rfwd3
2310061C15Rik
Cenpn
Mphosph6
Gins2
Klhdc4
Slc7a5
Cyba
Cdt1
Fanca
Afg3l1
Nup133
Dnmt1
Tmed1
Spc24
Zfp599
Anln
Dpy19l1
St3gal4
Tirap
Chek1
Stt3a
Thy1
Rnf26
C2cd2l
Dpagt1
H2afx
Hmbs
Hyou1
Sdhd
Rdx
Idh3a
Acsbg1
Etfa
1700017B05Rik
Cox5a
Kif23
Zwilch
Uchl4
Tipin
Dennd4a
Pif1
2810417H13Rik
Rps27l
Rora
Anxa2
Ccnb2
Myo5a
Leo1
Mb21d1
Ttk
Rwdd2a
Gm5620
Chst2
Acpl2
Mrps22
Ryk
Topbp1
Poc1a
Manf
Traip
Impdh2
Prkar2a
Ccdc51
Nme6
Cdc25a
Elp6
Nradd
Cmtm7
Eomes
Abhd5
Kif15
Mthfd1l
Fbxo5
Ulbp1
Lrp11
Nup43
Gm9797
Fam54a
Gm10145
Cenpw
Hdac2
Tube1
Rpf2
Prep
Lilrb4
Ccdc138
Sowahc
Adamts14
Ppa1
Dna2
Cdk1
Gm5778
Ggt1
Slc5a4b
Slc19a1
Sumo3
Ube2g2
Icosl
Ppap2c
Cdc34
Gzmm
Bsg
Hcn2
Palm
Arid3a
Sf3a2
Lmnb2
Thop1
Fzr1
AC153939.1
Txnrd1
1500009L16Rik
Hsp90b1
Parpbp
Nup37
Chpt1
Tmpo
Nedd1
Snrpf
Ndufa12
Nudt4
E2f7
Nap1l1
Phlda1
Nup107
Mdm1
Tsfm
Mettl1
Mars
Shmt2
Prim1
Atp5b
Timeless
Esyt1
Pa2g4
Smtn
Mtfp1
Nefh
Xbp1
Pold2
Myo1g
Gm11991
Hus1
Fignl1
2810442I21Rik
Fbxo48
Plek
0610010F05Rik
Snrnp25
Ccdc99
Rars
Hmmr
Nudcd2
Thg1l
Adam19
Gm16033
Fam71b
AL669948.1
Havcr2
3010026O09Rik
Canx
Agxt2l2
Hnrnpab
Nhp2
N4bp3
0610009B22Rik
Rad50
Anxa6
G3bp1
Mrpl22
Rasd1
Shmt1
Map2k3
Cenpv
Pfas
Ctc1
Aurkb
Tmem107
Eif5a
Pelp1
C1qbp
Fam64a
Rap1gap2
Hic1
Ywhae
4932415L08RIK
Gemin4
Cpd
Gm12346
Gm12734
Dhrs13
Spag5
Tmem97
Suz12
Atad5
Slfn3
Tada2a
Znhit3
Brip1
4632419I22Rik
Tubd1
Prr11
Ska2
Gm11491
Rad51c
Akap1
Hlf
Nme1
Lrrc59
Eme1
Slc35b1
Cbx1
Tbx21
Tbkbp1
Cisd3
Grb7
Cdc6
Top2a
Psmc3ip
Tubg1
AARSD1
Aarsd1
Vat1
Brca1
Rdm1
Arl4d
Tmem101
BC030867
Kif18b
Hexim2
Myl4
Tanc2
Ern1
Tex2
Kpna2
Psmd12
Nup85
Rhbdf2
Tk1
Birc5
Mrpl12
Slc25a10
P4hb
Arhgdia
Alyref
Hmga1-rs1
Gm6682
Gen1
Ddx1
Pqlc3
Pdia6
Rrm2
1700047I17Rik2
Mis18bp1
Lrr1
Mgat2
Dnaaf2
Pole2
Tmx1
Mthfd1
Plekhg3
Eif2s1
Rad51l1
Erh
Gm5436
Cep128
Gpr65
Tdp1
Psmc1
Calm1
Cpsf2
4831426I19Rik
Hsp90aa1
Cinp
Inf2
Siva1
Akt1
Crip1
4930427A07Rik
Ncapg2
Rapgef5
Cdca7l
Akr1e1
Adarb2
Hist1h4i
Hist1h2bj
Hist1h1d
Hist1h2bc
Hist1h1c
Gmnn
Dusp22
Gmds
Wrnip1
Serpinb1a
Serpinb6b
Serpinb9
Nqo2
Txndc5
Tbc1d7
Gfod1
5033430I15Rik
Dek
Cenpp
Cks2
Sfxn1
Thoc3
Arl10
Mxd3
Lman2
Golm1
4930486L24Rik
Ctla2b
Ctla2a
Ptch1
Zfp367
Zfp458
Trip13
Brd9
Cep72
Ankrd32
Dhfr
Fam151b
Arsb
Sv2c
Gm6169
Hexb
Serf1
Cenph
Ccnb1
Cenpk
Ipo11
Apoo-ps
Ndufaf2
Depdc1b
Ankrd55
Gzmk
Pelo
Kcnk5
Dnajc9
Ap3m1
Zmiz1
Anxa11
Tkt
Nt5dc2
5730469M10Rik
Cdkn3
Wdhd1
Lgals3
Dlgap5
Pspc1
Ska3
Gm4902
Kpna3
Rnaseh2b
Esco2
Gm20667
Cdca2
Dock5
Reep4
Dnajc15
Dgkh
Mtrf1
Gm5465
Diap3
Bora
Uchl3
Ipo5
Clybl
Nup155
Skp2
Tars
Pop1
Spag1
Ncald
Nudcd1
Rad21
Med30
Dscc1
Mtbp
Atad2
Gm2991
4930572J05Rik
Pycrl
Gpaa1
Tonsl
Recql4
Ncf4
Il2rb
Pdxp
Lgals1
Nol12
Pmm1
Cenpm
Gtse1
Zbed4
Creld2
Lmf2
Tuba1b
Tuba1a
Tuba1c
Troap
Racgap1
Soat2
Itgb7
Espl1
Aaas
Cbx5
Rogdi
Carhsp1
Nubp1
Mcm4
2610318N02Rik
Sdf2l1
Gm15648
Ranbp1
Gnb1l
Cdc45
Mrpl40
Alg3
Dnajb11
Rfc4
Umps
Ccdc14
Polq
Tmem39a
C330027C09Rik
Dcbld2
St3gal6
Cpox
Mina
Crybg3
Gm9581
Hspa13
D16Ertd472e
Mis18a
Gart
Chaf1b
Tfb1m
Tulp4
Gm2792
Sytl3
Mrpl18
Pkmyt1
Paqr4
1600002H07Rik
Ccnf
Pgp
Hn1l
Baiap3
Chtf18
AC159277.1
Wdr90
Mrpl28
Kifc5b
Hmga1
Fkbp5
Mtch1
Rsph1
U2af1
Myo1f
Kank3
Kifc1
Gm8696
Lsm2
D17H6S56E-5
Vars
Tcf19
Cchcr1
Tubb5
Nrm
Znrd1as
Polh
Ccnd3
Bysl
Tomm6
Prickle4
Gm14872
Apobec2
Sgol1
Chaf1a
Uhrf1
Tnfsf9
Ndc80
Dpy30
2410091C18Rik
Gemin6
Epas1
Rhoq
Pigf
Ttc7
Gm15978
Mettl4
Map3k8
Usp14
Snrpd1
Rbbp8
Ankrd29
Osbpl1a
Gm7701
Reep5
Kif20a
Cdc25c
Ctnna1
Prelid2
Lmnb1
Prrc1
Pcyox1l
Txnl1
Lman1
Pmaip1
Cep76
n-R5-8s1
Ska1
Pqlc1
Rttn
Unc93b1
Banf1
Kcnk7
Ehbp1l1
Fam89b
Sssca1
Pola2
Cdca5
Sac3d1
Pygm
Rasgrp2
Fkbp2
Rom1
Incenp
Gm10143
Fen1
Tmem109
Prpf19
AW112010
Mrpl16
Fam111a
Cep78
Cbwd1
Ak3
Kif20b
Rpp30
Kif11
Cep55
Hells
Entpd1
Arhgap19
Entpd7
Dpcd
Npm3
2010012O05Rik
As3mt
Gsto1
Mxi1
Smc3
Acsl5
Dclre1a
Plp2
Suv39h1
Ebp
Mid1ip1
Rp2h
Rbmx2
Mbnl3
Hprt
Gm14680
Hmgb3
Bcap31
Abcd1
L1cam
5430427O19Rik
Pola1
Kif4
Cxcr3
Nhsl2
Ercc6l
Magt1
Pgk1
Hmgn5
Cenpi
Armcx4
Prps1
Gm6382
Klf8
Prdx4
Sms
Rbbp7
Siah1b
Piga
Fancb
Gm15232

## Sheet: Venn down
Down_MAL_1147	Down_HDM_186	Down_EAE_64	Down_MAL_HDM_165	Down_MAL_EAE_16	Down_HDM_EAE_21	Down_MAL_HDM_EAE_23
Pcmtd1	Il17f	Il1r2	Arid5a	Angptl2	Il17a	Il10
AC103380.1	Khdc1b	Batf3	Ica1l	Etohi1	B3galt2	Acvr2a
AC136316.1	Stat4	Npdc1	Icos	Cnn3	Ermn	Smox
Arhgef4	Cd55	Ptges	AL645646.1	Aqp3	Rorc	Mmp9
Hs6st1	Ptprv	Zeb2	Acsl3	Tnfsf8	Tdrkh	AC140312.1
Neurl3	Camsap2	Itpka	Zfp281	Espn	Tspan2	Plekho1
Fer1l5	Slamf1	Mal	Prg4	Acpp	AC123795.1	Tspan5
Ankrd23	Cnst	Slc4a11	Sccpdh	Pkib	Magi1	Lmo4
Aff3	Gm13199	Srxn1	Otud1	Ggt5	5830411N06Rik	Samd11
Chst10	C630004M23RIK	Mcts2	Stxbp1	Kcnmb4	2210011C24Rik	Stx1a
Il1r1	Prkcq	Lingo4	Neb	Timp2	Usp2	Arnt2
Pgap1	Arl5a	Nfkb1	Dapl1	Ckb	Ccr1	Adam8
Plcl1	Gm13546	St6galnac3	Dpp4	Ccdc90a	Ppp1r14c	Podnl1
Clk1	Tanc1	Tctex1d1	Rapgef4	Cyp4f16	St6galnac1	Maf
Carf	Ube2e3	BB031773	Gpr155	Zfp799	Gm527	Serpinf1
Nbeal1	Chrm4	4933424M12Rik	Slc43a1	Ttc39c	Pxdc1	Fam20a
Ctla4	Syt13	Btbd19	Abtb2		Pcsk1	Grhl1
Klf7	Frmd5	Plk3	Prrg4		Vdr	Ston2
Plekhm3	Acoxl	Cited4	Bambi-ps1		4931406G06Rik	Rnase4
Idh1	Bcl2l11	Adc	Tasp1		Avpi1	Laptm4b
Pikfyve	Gfra4	Dhrs3	Trib3		Cysltr1	Ifngr2
Kansl1l	Adam33	Spon2	Bmp7			Ehd3
Ikzf2	Jag1	Igfbp7	Zbtb10			Snx2
Dnajb2	Gm11455	Il23r	Il21
Utp14b	9030418K01Rik	Mgll	Rapgef2
Wdfy1	Lama5	Il17re	Mex3a
A630001G21Rik	Pag1	Hpn	Il6ra
Armc9	Gm12534	Nupr1	Ecm1
Ramp1	Gm18588	Cd163l1	Gm12474
Per2	Ppm1l	Zfp941	Prss12
Hdac4	Fnip2	AC129082.1	Slc39a8
Hdac4	Lenep	Ccdc15	Tmem64
AC111074.1	Sema6c	Anp32a	Bach2
Bcl2	Mcl1	Ptprk	BC024582
Dsel	Gm20628	4933400F03Rik	Ankrd6
Mgat5	Kcna2	Hormad2	Mob3b
Gm15674	S1pr1	Gm12169	Ugcg
Pfkfb2	Gm9889	Slc22a4	Gm12543
Ikbke	B4galt1	Tmigd1	Tle1
Ctse	Raver2	Hlf	Ptprf
Slc41a1	Pde4b	Chad	Cdk6
Elk4	Fam151a	Nr1d1	Rundc3b
Mfsd4	Osbpl9	1700028N14Rik	Rnf32
Nuak2	D130007C19Rik	2310007L24Rik	Adamts3
Dstyk	Maneal	1700012B07Rik	Antxr2
Kdm5b	Tlr12	Inhba	Aff1
Rgs2	Col16a1	Epdr1	Gbp11
Gm15443	Padi4	Rbm24	Tgfbr3
Rabgap1l	Gm13154	Cap2	A630023P12Rik
Zbtb37	Trp73	Fam159b	Ulk1
Sell	Il6	Ltb4r1	Tesc
Atp1b1	Jakmip1	Mtss1	2410066E13Rik
Dcaf6	Klf3	Dgkg	Gadd45a
Cd84	Txk	Mmp25	Vamp5
Gm10521	Areg	Fam82a1	Foxp1
Slamf6	Bmp2k	March3	Plxnd1
Pydc4	Agpat9	Ablim3	Klrb1f
Pydc3	Ppp1cc	Hsbp1l1	St8sia1
Ifi204	Vps37b	Pqlc1	Fbxo17
Zfp238	Abcb9	Zdhhc24	Nav2
Adck3	Gpr146	Cdc42ep2	Peg12
Itpkb	Zfand2a	Rcor2	AC127595.1
Tmem63a	Slc29a4	Slc15a3	Sbf2
2210411M09Rik	Smo	Gda	Pik3c2a
Ephx1	Il17ra		Il4ra
Susd4	Klrk1		B4galnt4
Dusp10	Emp1		Tnfrsf26
Rps6kc1	Tm7sf3		Tnfrsf23
D730003I15Rik	Lair1		2610019F03Rik
Irf6	Dmwd		Kbtbd11
Plxna2	Tmem86a		Ddx28
Frmd4a	Pde8a		Cpne7
Usp6nl	P2ry2		Irf2bp2
7SK	Pde3b		Angptl6
Gm13217	Calca		Slc37a2
Pfkfb3	Dctpp1		Cxcr5
St8sia6	Itgad		Pou2af1
4930426L09Rik	Rasa3		Coro2b
Gad2	Palld		Myo6
Pnpla7	Ldhd		Slc9a9
Dpp7	Gm20388		Vipr1
Nacc2	Zcchc14		Tmem42
Card9	Galnt2		Ccr2
AL732311.1	1810008B01Rik		Myb
Slc2a6	Gm15775		Scml4
Zer1	Pard3		Spock2
Ttc16	Cdkn2d		Cdh23
Ptrh1	Ap1m2		4632428N05Rik
Ralgps1	Pvrl1		Ipmk
Fam125b	Mpzl2		Tcp11l2
Gsn	Scn4b		Irak3
Stom	Foxb1		Itga7
Scai	Gclc		Lif
Kif5c	Cd109		Nsg2
Lypd6b	1190002N15Rik		Tcf7
Wdsub1	Ky		A630014C17Rik
Baz2b	Ccr5		Il4
Ifih1	Fbxo30		Pdlim4
Metap1d	Ifngr1		Fam83g
Pdk1	Gm15270		Specc1
Gm13634	Slc16a10		Fam101b
BB114351	Adarb1		Ssh2
Sp9	Sbno2		Arl5c
Cir1	Gnptab		Ccr7
Gm13704	Slc17a8		Grn
Nfe2l2	Tmtc2		Map3k14
Prkra	Hmga2		Pitpnc1
Calcrl	Avil		Axin2
Ypel4	Smtn		Slc16a5
Slc39a13	Gm11946		Sec14l1
Gm9821	Rnf145		Tha1
Phf21a	Timd2		Sgsh
Qser1	Il5		Slc26a11
Ryr3	Hs3st3b1		Mafg
Pak6	Sco1		Metrnl
Plcb2	Myh3		Rnf144a
Capn3	Gas7		Ahr
Ttbk2	Pik3r5		2700097O09Rik
Shf	Slc6a4		Tgfb3
Gm14085	Cntnap1		Lgmn
Sqrdl	Slc16a6		Vrk1
Eid1	Gm11735		Tubb2a
Gm17555	Socs3		Rreb1
Zfp661	0610009L18Rik		Mylip
4933427J07Rik	AL663030.1		Unc5a
Prnp	Trib2		F2rl1
Gpcpd1	Baz1a		F2rl2
Rbbp9	Frmd6		Sgtb
Insm1	Syne2		Zswim6
Gzf1	Gm7862		Dnase1l3
Zfp120	Actn1		Nr1d2
Zfp937	Fam164c		Wdfy2
Gm10749	Rps6ka5		Tbc1d4
3300002I08Rik	Cdc42bpb		AC102815.1
Zfp442	Akr1c18		Kctd12
Acss1	Lyst		Gpr183
Sdcbp2	Prss16		Sepp1
Gm14278	Fam65b		Matn2
Src	Gm11346		Sntb1
Blcap	Glrx		Amigo2
Tgm2	F2r		Pou6f1
Lbp	Pde4d		Abcc5
Plcg1	Kcnk5		St6gal1
Chd6	Stab1		Trat1
Tox2	Ang		Gcfc1
Slpi	Trav14-1		Zscan10
Sdc4	Slc7a8		Tnfrsf12a
Pltp	Nynrin		Nme4
Cd40	AC098877.1		Rgs11
Eya2	Spata13		Itfg3
Fam65c	Tnfrsf19		Ddr1
Atp9a	Siah3		Bambi
Zfp217	Rap2a		Taf4b
2010011I20Rik	Gpr18		Macrod1
Cass4	Tmem65		Trpm6
Spo11	Lrrc6		Tmem2
Ppp4r1l-ps	Cacna1i		Frat2
Stx16	Rapgef3		Ubtd1
Zfp831	Sidt1		Sh3pxd2a
Gm14443	Plcxd2		Nanos1
Gm14440	St3gal6		Pim2
Gm4631	4932438H23Rik		Sh2d1a
Gm8923	Hmgn1		Gm14718
Gm8898	Gm15318		Armcx6
Gm14296	Prkd3		Armcx2
Gm14420	Camk4
Gm14325	Lrrtm2
BX284639.1	Gm15336
Zfp931	Sh3rf2
Ss18l1	Gramd3
Gm14340	Adrb2
9230112E08Rik	Lman1
Col20a1	Rasgrp2
Znf512b	Tle4
Tcea2	Gcnt1
Pcmtd2	Fam108b
Hey1	Frat1
Tpd52	Pi4k2a
Car2	AC123702.1
Ccdc144b	AC131756.1
4932438A13Rik	Atrnl1
Spry1	Arhgef9
Mgarp	Pja1
AC102860.1	Gm5127
Mgst2	P2ry10
Maml3	Klhl4
P2ry14
Gucy1b3
Gucy1a3
D930015E06Rik
Trim2
Fhdc1
Fcrl1
Arhgef11
Lrrc71
Pear1
Syt11
Ash1l
Hcn3
Gm16069
1700094D03Rik
Rps27
S100a9
Ctss
Gm129
Sv2a
Gm15441
Txnip
Itga10
Acp6
Bcl9
Prkab2
Hsd3b2
Igsf3
Ampd1
Chi3l7
2010016I18Rik
Dennd2d
Kcna3
AI504432
Csf1
Vcam1
Arhgap29
Usp53
Camk2d
Elovl6
Lef1
Bank1
Gm17316
Dapp1
Gbp1
Gbp2
Wls
Lyn
Tox
2610301B20Rik
Trp53inp1
Rbm12b2
Cpne3
Fam82b
Mdn1
Gabrr2
Srsf12
Zfp292
3110043O21Rik
B230312A22Rik
Tmem8b
Fbxo10
Hemgn
Gm16731
Abca1
Susd1
Snx30
Gm12567
Gm12573
Whrn
Ccdc171
Acer2
Jun
Nfia
Inadl
E130102H24Rik
Hspb11
9630013D21Rik
Cyp4x1
Mob3c
Ccdc17
Hyi
Ermap
Lepre1
Ccdc30
Hivep3
Macf1
Fhl3
9930104L06Rik
Eif2c3
Zmym6
Dcdc2b
D4Wsu53e
Ncmap
Cnr2
Id3
Ece1
Pink1
Iffo2
RP23-334I5.4
Aldh4a1
Vps13d
Mthfr
Kif1b
Spsb1
Rere
Errfi1
Per3
Tnfrsf14
Prkcz
Mib2
B930041F14Rik
Agrn
Isg15
AW011738
2310042D19Rik
Plekhn1
AC137938.1
Mll3
Lmbr1
Ccdc164
Mapre3
Krtcap3
Ift172
4933407H18Rik
Mxd4
Zfyve28
Fam193a
Tnip2
Grk4
Afap1
Slc2a9
Gm10025
RP24-448C16.2
Tlr1
Tmem156
Klhl5
Wdr19
Rhoh
Igj
Afp
Cxcl10
Ptpn13
Hsd17b11
BC005561
AC123687.1
Zfp951
Gbp8
Gbp9
Brdt
A830010M20Rik
Idua
Plcxd1
Galnt9
Ttc28
Mmab
Mvk
Oasl2
Oasl1
Ksr2
Oas2
Aldh2
Acad10
Sh2b3
Fam109a
Pptc7
P2rx7
A930024E05Rik
Tmem120b
Wdr66
Pitpnm2
Gm17132
Gm17131
Wbscr27
Rhbdd2
Por
Trip6
Slc12a9
Zan
Gigyf1
Zkscan1
BC037034
Ttyh3
Zfp12
Cyth3
Ankrd61
Tecpr1
Gm15708
Zkscan14
Lnx2
Pan3
N4bp2l1
Samd9l
Glcci1
Gm16042
Slc13a1
Ube2h
AB041803
Tmem140
Ubn2
Jhdm1d
Slc37a3
Trbv13-3
Trbv20
Trbv23
Trbv26
Gstk1
Zfp783
Krba1
Ccdc126
Aqp1
Metazoa_SRP
Hpgds
E230016M11Rik
Igkc
Rnf103
Tet3
Sfxn5
AC158662.2
Arhgap25
Txnrd3
Slc41a3
Lrig1
AC122929.1
AC153591.1
Ttll3
Tmcc1
Gm20404
Cacna2d4
Mical3
A330044P14Rik
Grcc10
Atn1
Lrrc23
Acrbp
Vamp1
Cd27
Ccnd2
Gm5884
Klrb1c
Clec2d
AC142191.1
Crebl2
Cdkn1b
Atf7ip
Ldhb
Gm15706
Itpr2
Klhdc5
Tmc4
Leng9
Nat14
Zfp579
Vmn1r58
Vmn1r65
Zfp667
Zfp28
Zfp773
Zfp418
Zfp551
Zscan18
Meis3
Hif3a
Apoe
Gm16184
Igsf23
Plaur
Atp1a3
Bckdha
Cyp2s1
AC119211.2
Egln2
Blvrb
Zfp607
1700049G17Rik
Dyrk1b
Plekhg2
Zfp36
Rasgrp4
Fam98c
Zfp420
Hcst
Aplp1
Tmem149
Ffar2
Gramd1a
Gm12763
Gm12764
Cebpa
Dpy19l3
Zfp619
Gm5595
Ptov1
Rras
Tulp2
Ppp1r15a
Dbp
Igf1r
Pgpep1l
Arrdc4
Ntrk3
Zfp710
Sema4b
Crtc3
Zscan2
Fsd2
Sh3gl3
Tmc3
Il16
Gm20413
Usp35
AC119880.1
Arrb1
Rnf169
Fam168a
Fchsd2
Stard10
Il18bp
Olfr613
Trim34a
Trim12a
Trim30d
Gm4759
Ampd3
Plekha7
Nucb2
Smg1
Gprc5b
Ypel3
Tbx6
Sez6l2
Prrt2
9130019O22Rik
Zfp629
Tgfb1i1
Rgs10
Inpp5f
Btbd16
Plekha1
Acadsb
Mgmt
Mapk1ip1
Bnip3
1600016N20Rik
Tnfrsf22
Insr
Zfp358
Cd209c
Evi5l
Efnb2
Irs2
Lamp1
Grk1
AC148089.1
Ap3m2
Rnf122
Tmem66
AC163097.1
Ddx60
Sc4mol
Gm10660
D130040H23Rik
Zfp963
Zfp866
Slc25a42
Use1
Slc27a1
Unc13a
Klf2
Inpp4b
Palm3
Il27ra
Zswim4
Nfix
Siah1a
Chd9
Ccdc102a
Gpr114
Zfp319
Ces2c
Elmo3
Zdhhc1
Ranbp10
Dus2l
AC134615.1
Nfat5
St3gal2
Znrf1
Zfp1
Hsdl1
Dnaaf1
Rab4a
Mmp12
Sesn3
Gpr83
Folr4
BC017612
Fbxl12
A230050P20Rik
S1pr2
AB124611
Ldlr
Dock6
Vwa5a
Zbtb16
Usp28
Gm16124
Dnaja4
C230081A13Rik
Snx33
Neil1
Hexa
Parp6
Senp8
Myo9a
Parp16
Fbxl22
Vps13c
Aqp9
BC031353
7SK
AC159313.1
Slc17a5
Sh3bgrl2
Bckdhb
Dopey1
Nt5e
Zfp949
BC043934
AC121121.1
Slc25a36
Gm16185
Rab6b
Nphp3
Abhd14b
Parp3
Rnf123
Dag1
1700102P08Rik
Pfkfb4
Plxnb1
Tmie
Als2cl
Gm9846
Itga9
Vill
Syne1
Ipcef1
Cnksr3
Utrn
Plagl1
Phactr2
Hivep2
Txlnb
Ccdc28a
Nhsl1
Map3k5
Mtap7
AC153556.1
E030030I06Rik
RP23-58L22.8
L3mbtl3
Fam26f
Dse
Marcks
Gm16364
Sesn1
Smpdl3a
P4ha1
Ddit4
Srgn
Zfp365
Arid5b
Gm5134
Prmt2
Pcbp3
Gm9978
2610008E11Rik
Dos
Izumo4
Gadd45b
Atcay
Zfr2
Matk
Tjp3
Ankrd24
Ckap4
Btbd11
Nt5dc3
Gm872
Eea1
Btg1
5330438D12Rik
Tbc1d30
Gns
Ctdsp2
2009-03-01
Dtx3
Rdh1
Rdh16
Stat2
Rdh5
Bloc1s1
Tespa1
Pisd-ps1
Sfi1
Pik3ip1
Tcn2
Ccdc157
Kremen1
Znrf3
Nacad
Ramp3
4930512M02Rik
Ehbp1
Zrsr1
A230004M16Rik
Tgtp1
Tgtp2
Rnf130
Grm6
AL935177.3
Aff4
Gm17334
P4ha2
Rapgef6
Igtp
Irgm2
2810021J22Rik
Flcn
Tom1l2
Tnfrsf13b
2410006H16Rik
Ntn1
Cd68
Zbtb4
Dlg4
0610010K14Rik
Rnf167
Camkk1
Mir22hg
Slc43a2
Aldoc
Cdk5r1
Myo1d
Slfn5
Slfn1
Usp32
Ypel2
A430104N18Rik
Cuedc1
Msi2
Mmd
Pdk2
Abi3
Gngt2
Gm11532
Cacnb1
Fbxl20
Gm11632
Thra
Igfbp4
Jup
Atp6v0a1
Ezh1
Tmem106a
Rundc3a
Pecam1
Gm11707
Gm11714
Gm11696
Arsg
Ttyh2
Rab37
Gm11695
Rnf157
Dnahc17
Cyth1
Card14
Rnf213
Narf
Mfsd2b
Rhob
Fam84a
Hpcal1
Gm10480
Asap2
Rsad2
Hbp1
CT572998.1
Tspan13
Bzw2
Sostdc1
Dock4
AC157213.1
Arhgap5
Egln3
3110056K07Rik
Daam1
Spnb1
Rdh12
Zfp36l1
AC108401.1
AC108401.2
Map3k9
C130039O16Rik
Aldh6a1
Fos
2310044G17Rik
Eml5
RP23-377G8.3
Asb2
Otub2
Serpina3f
Evl
Degs2
Begain
Ppp1r13b
Pld4
Jag2
Ighg1
Ighm
Dnahc11
Itgb8
Asb13
Gpr137b
Tcrg-C2
Zscan12
Zfp187
Prl8a1
Dsp
BC024659
Cd83
Jarid2
C78339
Kif13a
Zfp169
Syk
Dapk1
Ctsl
Zfp369
Zfp708
Zfp459
Zfp874a
Zfp874b
Tert
Slc12a7
Tppp
Arrdc3
Rasa1
Ssbp2
Rasgrf2
Serinc5
Jmy
Scamp1
Wdr41
Enc1
Fcho2
AC132347.1
Mccc2
Ccdc125
Mast4
Adamts6
Il6st
Parp8
Emb
Gm9752
Gm3636
Abhd6
Kctd6
Usp54
Myst4
Il17rb
Cacna1d
Nisch
Sh3bp5
Colq
Wdfy4
Gm8113
4930431P03Rik
Ptger2
Gch1
Rpgrip1
AC163653.3
Trav6n-6
Trav14n-3
AC161872.5
Trav14-2
Trav8-2
Abhd4
Zfhx2
Rec8
AC154731.1
Zmym5
Lats2
Trim13
Neil2
Zfp395
Bnip3l
Rhobtb2
Egr3
Lpar6
Tsc22d1
Lacc1
Tnfsf11
4921525B02Rik
Dzip1
Mbnl2
AW549877
Gm16077
Card6
Gm2245
Rictor
Il7r
Spef2
Pdzd2
Basp1
Myo10
Fam134b
Trio
Pgcp
Rnf19a
Ankrd46
Ext1
Zhx2
Fbxo32
Asap1
Col22a1
Ptk2
Slc45a4
Arc
Zfp623
Adck5
Kifc2
Arhgap39
1700088E04Rik
Gm10863
Pla2g6
Maff
Cbx7
Tnrc6b
Tef
Tob2
Cyp2d22
5031439G07Rik
Fbln1
Ttc38
Cerk
Hdac10
Mapk11
Fam116b
Arsa
Cntn1
Prickle1
Adcy6
Mll2
Prpf40b
Nckap5l
Dip2b
Slc11a2
Gm20680
Galnt6
1810009N23Rik
Acvrl1
Acvr1b
Calcoco1
Itga5
Pde1b
Vasn
Mgrn1
Ciita
Snn
AC163630.1
Fgd4
Tmem191c
Car15
Klhl6
Klhl24
Fam131a
Clcn2
B630019A10Rik
BC106179
Rtp4
Bcl6
Lpp
Fam43a
Dirc2
Hspbap1
Zbtb20
Zbtb20
Tigit
Zdhhc23
Cd200r3
Btla
Cep97
Impg2
Filip1l
Pros1
Gm20469
Samsn1
Nrip1
AC122837.1
App
Bach1
Tiam1
Gm15965
Ifnar2
RP23-190G10.4
A930006K02Rik
Slc5a3
Setd4
Cbr1
Ttc3
AC171211.1
Gm15340
Brwd1
Mx1
Mx2
Prdm15
Zdhhc14
Synj2
Tmem181b-ps
Rps6ka2
Prdm9
Rgmb
Zfp97
Zfp53
Abca3
D330041H03Rik
Dnase1l2
Pkd1
Rab11fip3
Decr2
Dusp1
A930001N09Rik
Phf1
Pacsin1
Zfp523
Cpne5
Dnahc8
Akap8l
Rasal3
Zfp871
Cyp4f13
H2-K2
H2-Ke6
Col11a2
H2-Oa
H2-DMb2
H2-Ob
H2-Aa
H2-Eb1
Btnl7
Ager
Prrt1
Zbtb12
Lta
H2-Q2
Gm17414
Gabbr1
Cd2ap
Slc25a27
Cyp39a1
Enpp5
Tmem63b
Abcc10
Zfp318
Cul9
Klc4
Cul7
Guca1b
Treml2
B430306N03Rik
Zfp119a
Kdm4b
Tnfsf14
Ankrd12
Crim1
Fez2
Qpct
Map4k3
Thada
G430049J08RIK
Apc
Cxxc5
Psd2
Rell2
Tnfaip8
4930511M06Rik
Gm4951
Gm4841
F830016B08Rik
Iigp1
Synpo
Ppargc1b
Malt1
D18Ertd653e
Slc14a1
Pard6g
Nfatc1
Atp9b
Zfp516
Doc2g
Pitpnm1
Carns1
AC109138.2
Pold4
Ccs
Npas4
Malat1
Neat1
Slc25a45
Mpeg1
Vps13a
Glis3
Acta2
Fas
Lipa
Ifit3
Gm14446
Ifit1
Dntt
Pyroxd2
Dnmbp
Sufu
Trim8
Pdcd4
Hspa12a
Gm15253
Syp
Prickle3
Kcnd1
Gata1
Wdr13
Gpr34
Cxx1c
Arhgap4
Taz
Gdi1
Plxna3
Mpp1
Maged1
Zc3h12b
Efnb1
Dlg3
Chic1
A630033H20Rik
Diap2
Xkrx
Armcx3
Gprasp1
Gprasp2
BC065397
Fam199x
Rnf128
Tsc22d3
Kctd12b
Sat1
Gpm6b
Tlr7
Arhgap6

## Sheet: MAL_UP_pathways
GO.ID	Term	Annotated	Significant	Expected	classicFisher	weight0Fisher	GOI
GO:0007067	mitotic nuclear division	399	119	19.08	< 1e-30	< 1e-30	Rcc1, Tubg1, Mtbp, Espl1, Cdc20, Nusap1, Cdca2, Fam64a, Kif22, Birc5, Bub1, Bub1b, Bub3, Aspm, Ccna2, Ccnb2, Ccnf, Cdc25a, Cdc25b, Cdc25c, Cdk1, Chek1, Cit, Smc3, Smc2, Gem, Cdca3, Gsg2, Hells, Incenp, Kif11, Kif4, Mad1l1, Mybl2, Nedd1, Nek2, Nudc, Nup62, Pdgfb, Plk1, Rad21, Ran, Ranbp1, Stil, Kntc1, Aurkb, Aurka, Gen1, Ncaph, Tada2a, Mis18bp1, Timeless, Ska3, Wee1, Rbbp8, Ywhah, Kif18a, Cenpe, E…
GO:0006270	DNA replication initiation	25	19	1.2	9.5e-21	9.5e-21	Gins4, Ccne1, Ccne2, Cdc45, Cdc7, Mcm3, Mcm2, Mcm4, Mcm5, Mcm6, Mcm7, Pola1, Pola2, Cdc6, Gins2, Cdt1, Mcm10, Ticrr, Wrnip1
GO:0045454	cell redox homeostasis	57	13	2.73	2.2e-06	2.2e-06	Txndc5, Vimp, Pdia4, Gsr, Pdia3, P4hb, Txn1, Txnrd1, Prdx4, Txnl1, Magt1, Pdia6, Tmx1
GO:0000082	G1/S transition of mitotic cell cycle	158	27	7.56	8e-09	3.5e-06	Rcc1, Mtbp, Tcf19, Akt1, Bcat1, Ccne1, Ccne2, Cdc25a, Cdc45, E2f1, Ezh2, Gsg2, Pole, Ppp3ca, Rdx, Rpa2, Rbbp8, Rfwd3, Skp2, Larp7, Kif14, Iqgap3, E2f7, Anp32b, Cdca5, Rps27l, Cdkn3
GO:0006915	apoptotic process	1709	131	81.72	4.2e-08	0.00014	Fam72a, Itga1, Vimp, Ggct, Ada, Akt1, Anxa6, Apbb1, Birc5, Atpif1, Bard1, Blm, Brca1, Brca2, Bub1, Bub1b, C1qbp, Hyou1, Casp3, Ctnna1, Runx3, Cdk1, Cxcr3, Crip1, Ctsc, Cycs, Dapk2, Degs1, E2f1, Ect2, Eif2s1, Eif2ak3, Fasl, Gas2, Gpr65, Gpld1, Pdia3, Hspa5, Gzma, Hdac2, Hells, Hic1, Hk2, Il2ra, Il2rb, Lgals1, Lgals3, Lgals7, Lsp1, Melk, Mt1, Mt3, Ncf1, Nme1, Nos1, Nup62, Sigmar1, P4hb, Prf1, Pa2g4…
GO:0034976	response to endoplasmic reticulum stress	200	27	9.56	1.1e-06	0.00023	Txndc5, Ubxn8, Vimp, Hyou1, Pdia4, Casp3, Eif2s1, Eif2ak3, Pdia3, Hspa5, P4hb, Psmc1, Hsp90b1, Ube2g2, Xbp1, Aars, Bcap31, Tbl2, Pmaip1, Usp14, Fam129a, Sdf2l1, Lrrk2, Dab2ip, Pdia6, Tmx1, Ern1
GO:0030101	natural killer cell activation	93	9	4.45	0.03375	0.00329	Il18r1, Il2rb, Havcr2, Pglyrp1, Tyro3, Axl, Klrk1, Slamf7, Ulbp1

[truncated: 5 more sheets: HDM_UP_paways, EAE_UP_pathways, MAL_DOWN_pathways, HDM_DOWN_pathways, EAE_DOWN_pathways]
