# Supplementary material for: c-Maf controls immune responses by regulating disease-specific gene networks and repressing IL-2 in CD4+ T cells
Source: Springer Nature journal article supplement (doi:10.1038/s41590-018-0083-5), 2018-04-13
Supplement: MOESM6 [file 41590_2018_83_MOESM6_ESM_Supp_T_4.xlsx]

## Sheet: Nodes
MGI.symbol	Location	Family	Drugs	MAL	HDM	EAE	Function	Immune system
A630033H20Rik	Plasma Membrane	G-protein coupled receptor		down	NA	NA	Unknown
Actn1	Cytoplasm	transcription regulator		NA	down	NA	Cytoskeleton
Adgrd1	Plasma Membrane	G-protein coupled receptor		NA	NA	NA	Transmembrane signalling
Adgrg5	Plasma Membrane	G-protein coupled receptor		NA	NA	NA	Transmembrane signalling
Adrb2	Plasma Membrane	G-protein coupled receptor	articaine/epinephrine, bupivacaine/epinephrine, carteolol, dipivefrin, meluadrine, epinephrine/prilocaine, epinephrine/lidocaine, bedoradrine, KUL 7211, celiprolol, arformoterol, indacaterol, myogane, budesonide/formoterol, nebivolol, vilanterol, olodaterol, formoterol/mometasone furoate, glycopyrrolate/indacaterol, fluticasone furoate/vilanterol, latanoprost/timolol, umeclidinium/vilanterol, epi…	NA	down	NA	Receptor
Aff1	Nucleus	transcription regulator		down	down	NA	Transcription
Aff3	Nucleus	transcription regulator		down	NA	NA	Lymphoid develepment	Yes
Aff4	Nucleus	transcription regulator		down	NA	NA	RNA pol II Transcription
Ager	Plasma Membrane	transmembrane receptor	2-O,3-O-desulfated heparin	down	NA	NA	Receptor
Ahr	Nucleus	ligand-dependent nuclear receptor		down	down	NA	Th17	Yes
AI854703	Nucleus	transcription regulator		NA	NA	NA	Unknown
Ajuba	Nucleus	transcription regulator		NA	NA	NA	Many
Ankrd46	Nucleus	transcription regulator		down	NA	NA	Unknown
Ankrd55	Nucleus	transcription regulator		up	NA	NA	Unknown
Ankrd6	Nucleus	transcription regulator		down	down	NA	Unknown
Ankrd61	Nucleus	transcription regulator		down	NA	NA	Unknown
Antxr1	Plasma Membrane	transmembrane receptor		NA	up	NA	Adhesion
Antxr2	Plasma Membrane	transmembrane receptor		down	down	NA	Adhesion
Apbb1	Cytoplasm	transcription regulator		up	NA	up	DNA replication and repair
Areg	Extracellular Space	growth factor		NA	down	NA	Growth factor
Arid3a	Nucleus	transcription regulator		up	NA	NA	Cell cycle
Arid5a	Nucleus	transcription regulator		down	down	NA	Unknown
Arid5b	Nucleus	transcription regulator		down	NA	NA	Metabolism
Arnt2	Nucleus	transcription regulator		down	down	down	Th17	Yes
Asb1	Nucleus	transcription regulator		up	NA	NA	Cytokine production
Asb2	Nucleus	transcription regulator		down	NA	NA	Development
Ash1l	Nucleus	transcription regulator		down	NA	NA	Chromatin remodelling
Atn1	Nucleus	transcription regulator		down	NA	NA	Development
Bach1	Nucleus	transcription regulator		down	NA	NA	M related	Yes
Bach2	Nucleus	transcription regulator		down	down	NA	M related	Yes
Bard1	Nucleus	transcription regulator		up	NA	NA	Cancer
Basp1	Nucleus	transcription regulator		down	NA	NA	Cancer
Batf3	Nucleus	transcription regulator		NA	NA	down	IL2	Yes
Bcam	Plasma Membrane	transmembrane receptor		NA	up	up	Adhesion
Bcl6	Nucleus	transcription regulator		down	NA	NA	Tfh	Yes
Bhlhe40	Nucleus	transcription regulator		up	NA	NA	Circadian clock
Bhlhe41	Nucleus	transcription regulator		up	NA	NA	Circadian clock
Bmp7	Extracellular Space	growth factor		down	down	NA	Development
Brca1	Nucleus	transcription regulator		up	NA	NA	Cancer
Brca2	Nucleus	transcription regulator		up	NA	NA	Cancer
Brwd1	Nucleus	transcription regulator		down	NA	NA	Many
Btbd11	Other	transcription regulator		down	NA	NA	Unknown
Btg1	Nucleus	transcription regulator		down	NA	NA	Cell cycle
C1qbp	Cytoplasm	transcription regulator		up	NA	NA	Complement	Yes
Calcoco1	Nucleus	transcription regulator		down	NA	NA	DNA replication and repair
Calcrl	Plasma Membrane	G-protein coupled receptor		down	NA	NA	Development
Calr	Cytoplasm	transcription regulator		up	NA	NA	Protein folding
Carf	Nucleus	transcription regulator		down	NA	NA	Development
Cbx1	Nucleus	transcription regulator		up	NA	NA	Chromatin remodelling
Cbx3	Nucleus	transcription regulator		up	NA	NA	Chromatin remodelling
Cbx5	Nucleus	transcription regulator		up	NA	NA	Chromatin remodelling
Ccl1	Extracellular Space	cytokine		NA	up	NA	Chemokine	Yes
Ccl3	Extracellular Space	cytokine		NA	NA	up	Chemokine	Yes
Ccl4	Extracellular Space	cytokine		NA	NA	up	Chemokine	Yes
Ccne1	Nucleus	transcription regulator		up	NA	NA	Cell cycle
Ccr1l1	Plasma Membrane	G-protein coupled receptor		NA	NA	NA	Chemokine receptor	Yes
Ccr2	Plasma Membrane	G-protein coupled receptor	PF-4136309	down	down	NA	Chemokine receptor	Yes
Ccr5	Plasma Membrane	G-protein coupled receptor	maraviroc, vicriviroc, ancriviroc	NA	down	NA	Chemokine receptor	Yes
Ccr7	Plasma Membrane	G-protein coupled receptor		down	down	NA	Chemokine receptor	Yes
Ccr8	Plasma Membrane	G-protein coupled receptor		up	up	NA	Chemokine receptor	Yes
Ccrl2	Plasma Membrane	G-protein coupled receptor		NA	up	NA	Chemokine receptor	Yes
Cd160	Plasma Membrane	transmembrane receptor		NA	up	NA	Receptor	Yes
Cd27	Plasma Membrane	transmembrane receptor	CDX-1127	down	NA	NA	Treg	Yes
Cd40	Plasma Membrane	transmembrane receptor	dacetuzumab	down	NA	NA	TCR signalling	Yes
Cd80	Plasma Membrane	transmembrane receptor	abatacept, belatacept, abatacept/methotrexate	NA	up	NA	TCR signalling	Yes
Cd83	Plasma Membrane	transmembrane receptor		down	NA	NA	Memory	Yes
Cdkn2d	Cytoplasm	transcription regulator		NA	down	NA	Cell cycle
Ceacam16	Cytoplasm	transcription regulator		NA	up	NA	Development
Cebpa	Nucleus	transcription regulator		down	NA	NA	Tfh	Yes
Cep290	Cytoplasm	transcription regulator		NA	up	NA	Development
Chrm4	Plasma Membrane	G-protein coupled receptor	fesoterodine, ABT-089, protoveratrine derivative, aclidinium, dextromethorphan/quinidine, umeclidinium, glycopyrrolate/indacaterol, umeclidinium/vilanterol, olodaterol/tiotropium, indacaterol/tiotropium, atropine/edrophonium, cyclopentolate/phenylephrine, albuterol/ipratropium, trihexyphenidyl, carbamylcholine, methacholine, diphenhydramine, doxepin, quinidine, procyclidine, trospium, homatropine…	NA	down	NA	Receptor
Ciita	Nucleus	transcription regulator		down	NA	NA	Antigen presentation	Yes
Cir1	Nucleus	transcription regulator		down	NA	NA	Notch Signalling
Cited4	Nucleus	transcription regulator		NA	NA	down	Transcription
Ckap5	Nucleus	transcription regulator		up	NA	NA	Cell Migration
Clec2d	Plasma Membrane	transmembrane receptor		down	NA	NA	NK	Yes
Cmtm7	Extracellular Space	cytokine		up	NA	NA	Receptor
Cnr2	Plasma Membrane	G-protein coupled receptor	trans-(¦–)-nabilone, BAY 38-7271, delta-9-tetrahydrocannabinol	down	NA	NA	Receptor
Colec12	Plasma Membrane	transmembrane receptor		NA	up	NA	Receptor
Creb3l1	Nucleus	transcription regulator		NA	up	NA	ER stress
Crebl2	Nucleus	transcription regulator		down	NA	NA	Unknown
Csf1	Extracellular Space	cytokine		down	NA	NA	Cytokine	Yes
Ctla4	Plasma Membrane	transmembrane receptor	ipilimumab, ticilimumab, ipilimumab/nivolumab	down	NA	NA	TCR signalling	Yes
Cxcl10	Extracellular Space	cytokine	MDX-1100	down	NA	NA	Chemokine	Yes
Cxcl15	Extracellular Space	cytokine		NA	up	NA	Chemokine	Yes
Cxcl3	Extracellular Space	cytokine		NA	NA	NA	Chemokine	Yes
Cxcr3	Plasma Membrane	G-protein coupled receptor		up	NA	NA	Chemokine	Yes
Cxcr5	Plasma Membrane	G-protein coupled receptor		down	down	NA	Tfh	Yes
Cysltr1	Plasma Membrane	G-protein coupled receptor	zeneca ZD 3523, montelukast, zafirlukast, pranlukast	NA	down	down	Receptor
Cysltr2	Plasma Membrane	G-protein coupled receptor	montelukast, nedocromil sodium, zafirlukast	NA	up	NA	Receptor
Dag1	Plasma Membrane	transmembrane receptor		down	NA	NA	Cell Migration
Dbp	Nucleus	transcription regulator		down	NA	NA	Circadian clock
Dcaf6	Nucleus	transcription regulator		down	NA	NA	Nuclear receptor co-activator
Ddx20	Nucleus	transcription regulator		up	NA	NA	RNA processing
Dek	Nucleus	transcription regulator		up	NA	NA	RNA processing
Depdc1a	Nucleus	transcription regulator		up	NA	NA	Transcription
Dkk3	Extracellular Space	cytokine		NA	NA	up	Wnt signalling
E2f1	Nucleus	transcription regulator		up	NA	NA	Cell cycle
E2f2	Nucleus	transcription regulator		up	NA	NA	Cell cycle
E2f7	Nucleus	transcription regulator		up	NA	NA	Cell cycle
E2f8	Nucleus	transcription regulator		up	NA	NA	Cell cycle
Ebi3	Extracellular Space	cytokine		up	up	NA	T cell differentiation	Yes
Edn1	Extracellular Space	cytokine		NA	up	NA	Cytokine
Egr3	Nucleus	transcription regulator		down	up	NA	TCR signalling	Yes
Eid1	Nucleus	transcription regulator		down	NA	NA	Transcription
Elk4	Nucleus	transcription regulator		down	NA	NA	TCR signalling	Yes
Eomes	Nucleus	transcription regulator		up	NA	NA	Treg	Yes
Epas1	Nucleus	transcription regulator		up	NA	NA	Hypoxia response
Ezh2	Nucleus	transcription regulator	EPZ-6438, GSK2816126	up	NA	NA	Chromatin remodelling
F2r	Plasma Membrane	G-protein coupled receptor	chrysalin, vorapaxar, PAR1 inhibitor, argatroban, bivalirudin	NA	down	NA	Coagulation
F2rl1	Plasma Membrane	G-protein coupled receptor		down	down	NA	Coagulation
F2rl2	Plasma Membrane	G-protein coupled receptor		down	down	NA	Coagulation
F2rl3	Plasma Membrane	G-protein coupled receptor		up	NA	NA	Coagulation
F3	Plasma Membrane	transmembrane receptor	activated recombinant human factor VII	NA	up	NA	Coagulation
Fam3c	Extracellular Space	cytokine		up	NA	NA	Wnt signalling
Fas	Plasma Membrane	transmembrane receptor		down	NA	NA	Th1	Yes
Fasl	Extracellular Space	cytokine		up	NA	NA	Th1	Yes
Fcgrt	Plasma Membrane	transmembrane receptor		up	NA	NA	Receptor	Yes
Ffar2	Plasma Membrane	G-protein coupled receptor		down	NA	NA	Metabolism
Ffar4	Plasma Membrane	G-protein coupled receptor		NA	NA	NA	Metabolism
Fgf13	Extracellular Space	growth factor		NA	NA	up	Cytoskeleton
Fgf16	Extracellular Space	growth factor		NA	up	NA	Development
Fos	Nucleus	transcription regulator		down	NA	NA	TCR signalling	Yes
Foxb1	Nucleus	transcription regulator		NA	down	NA	Development
Foxm1	Nucleus	transcription regulator		up	NA	NA	Cell cycle
Foxp1	Nucleus	transcription regulator		down	down	NA	Tfh	Yes
Foxp3	Nucleus	transcription regulator		NA	up	up	Treg	Yes
Fzd7	Plasma Membrane	G-protein coupled receptor		NA	up	NA	Wnt signalling
Gabbr1	Plasma Membrane	G-protein coupled receptor	arbaclofen placarbil, arbaclofen, baclofen, vigabatrin	down	NA	NA	Receptor
Gas7	Cytoplasm	transcription regulator		NA	down	NA	Development
Gata1	Nucleus	transcription regulator		down	NA	NA	Erythroid development
Gfra4	Plasma Membrane	transmembrane receptor		NA	down	NA	Development
Glis2	Nucleus	transcription regulator		NA	up	NA	Development
Glis3	Nucleus	transcription regulator		down	NA	NA	Development
Gmnn	Nucleus	transcription regulator		up	NA	NA	Cell cycle
Gpc1	Plasma Membrane	transmembrane receptor		up	NA	NA	Many
Gpr146	Plasma Membrane	G-protein coupled receptor		NA	down	NA	Receptor
Gpr155	Plasma Membrane	G-protein coupled receptor		down	down	NA	Receptor
Gpr160	Plasma Membrane	G-protein coupled receptor		up	NA	NA	Receptor
Gpr176	Plasma Membrane	G-protein coupled receptor		NA	up	NA	Receptor
Gpr179	Plasma Membrane	G-protein coupled receptor		NA	up	NA	Receptor
Gpr18	Plasma Membrane	G-protein coupled receptor		NA	down	NA	Receptor
Gpr34	Plasma Membrane	G-protein coupled receptor		down	up	NA	Receptor
Gpr65	Plasma Membrane	G-protein coupled receptor		up	NA	NA	Receptor
Gpr83	Plasma Membrane	G-protein coupled receptor		down	up	NA	Receptor
Gprc5b	Plasma Membrane	G-protein coupled receptor		down	NA	NA	Receptor
Gprc5c	Plasma Membrane	G-protein coupled receptor		NA	up	NA	Receptor
Grhl1	Nucleus	transcription regulator		down	down	down	Metabolism
Grm6	Plasma Membrane	G-protein coupled receptor	fasoracetam	down	NA	NA	Development
Grn	Extracellular Space	growth factor		down	down	NA	Cytokine like
Gtf2ird1	Nucleus	transcription regulator		NA	up	NA	Cell cycle
Gtf3a	Nucleus	transcription regulator		up	NA	NA	Transcription
Gtf3c5	Nucleus	transcription regulator		up	NA	NA	RNA pol III Transcription
Gzf1	Nucleus	transcription regulator		down	NA	NA	Unknown
H2-Aa	Plasma Membrane	transmembrane receptor		down	NA	NA	Antigen presentation	Yes
H2-DMb2	Plasma Membrane	transmembrane receptor		down	NA	NA	Antigen presentation	Yes
H2-Eb1	Plasma Membrane	transmembrane receptor		down	NA	NA	Antigen presentation	Yes
H2-Oa	Plasma Membrane	transmembrane receptor		down	NA	NA	Antigen presentation	Yes
H2-Ob	Plasma Membrane	transmembrane receptor		down	NA	up	Antigen presentation	Yes
H2afx	Nucleus	transcription regulator		up	NA	NA	Chromatin remodelling
Hbp1	Nucleus	transcription regulator		down	NA	NA	Cell cycle
Hc	Extracellular Space	cytokine	eculizumab, IgG	NA	up	NA	Complement	Yes
Hcst	Plasma Membrane	transmembrane receptor		down	NA	NA	NK	Yes
Hdac10	Nucleus	transcription regulator	tributyrin, belinostat, pyroxamide, chidamide, romidepsin	down	NA	NA	Chromatin remodelling
Hdac11	Nucleus	transcription regulator	tributyrin, belinostat, pyroxamide, romidepsin	NA	up	NA	Chromatin remodelling
Hdac2	Nucleus	transcription regulator	tributyrin, belinostat, pyroxamide, histone deacetylase class II inhibitors, bortezomib/vorinostat, chidamide, 4SC-202, vorinostat, romidepsin, theophylline	up	NA	NA	Chromatin remodelling
Hdac4	Nucleus	transcription regulator	tributyrin, belinostat, pyroxamide, romidepsin	down	NA	NA	Chromatin remodelling
Hexim2	Nucleus	transcription regulator		up	NA	NA	RNA pol III Transcription
Hey1	Nucleus	transcription regulator		down	NA	NA	Notch Signalling
Hgf	Extracellular Space	growth factor	rilotumumab, MP0250	NA	up	NA	Receptor
Hic1	Nucleus	transcription regulator		up	NA	NA	Cancer
Hif3a	Nucleus	transcription regulator		down	NA	NA	Hypoxia response
Hivep2	Nucleus	transcription regulator		down	NA	NA	T cell activation	Yes
Hivep3	Nucleus	transcription regulator		down	NA	NA	Cell cycle
Hlf	Nucleus	transcription regulator		up	NA	down	RNA pol III Transcription
Hmga1-rs1	Nucleus	transcription regulator		up	NA	NA	Transcription
Hmgb2	Nucleus	transcription regulator		up	NA	NA	Cell cycle
Hmgn1	Nucleus	transcription regulator		NA	down	NA	Chromatin remodelling
Hmmr	Plasma Membrane	transmembrane receptor		up	NA	NA	Cell Migration
Hopx	Nucleus	transcription regulator		up	up	NA	Development
Hoxb4	Nucleus	transcription regulator		NA	up	NA	Development
Hsf4	Nucleus	transcription regulator		up	NA	NA	Stress response
Icos	Plasma Membrane	transmembrane receptor		down	down	NA	Tfh	Yes
Id3	Nucleus	transcription regulator		down	NA	NA	Treg	Yes
Ifi204	Nucleus	transcription regulator		down	NA	NA	IFN gamma induced	Yes
Ifnar2	Plasma Membrane	transmembrane receptor	interferon alfacon-1, PEG-interferon alfa-2a, interferon beta-1a, recombinant interferon, pegintron/ribavirin, interferon alfa-n1, PEG-interferon alfa-2a/ribavirin, IFNA2, hydroxyurea/recombinant interferon, imatinib/nilotinib/pegintron, cladribine/peginterferon alfa-2a, nitazoxanide/peginterferon alfa-2a/ribavirin, interferon alfacon-1/ribavirin, interferon alfa-2b/ribavirin, pegintron, interfer…	down	NA	NA	Type I IFN	Yes
Ifngr1	Plasma Membrane	transmembrane receptor	interferon gamma-1b	NA	down	NA	Th1	Yes
Ifngr2	Plasma Membrane	transmembrane receptor	interferon gamma-1b	down	down	down	Th1	Yes
Igf1r	Plasma Membrane	transmembrane receptor	picropodophyllin, linsitinib, cixutumumab, ganitumab, AVE1642, BIIB022, IGF1, dalotuzumab, ceritinib, MM-141, IGF-methotrexate conjugate, PL225B, KW-2450	down	NA	NA	Cell Survival	Yes
Ighm	Plasma Membrane	transmembrane receptor		down	up	up	Receptor
Ikzf2	Nucleus	transcription regulator		down	NA	NA	Treg	Yes
Ikzf4	Nucleus	transcription regulator		NA	up	NA	Treg	Yes
Il10	Extracellular Space	cytokine		down	down	down	IL10	Yes
Il16	Extracellular Space	cytokine		down	NA	NA	Signalling
Il17a	Extracellular Space	cytokine	secukinumab, ixekizumab	NA	down	down	Th17	Yes
Il17f	Extracellular Space	cytokine		NA	down	NA	Th17	Yes
Il17ra	Plasma Membrane	transmembrane receptor		NA	down	NA	Th17	Yes
Il17rb	Plasma Membrane	transmembrane receptor		down	up	NA	Th17	Yes
Il18	Extracellular Space	cytokine		NA	up	NA	Th1	Yes
Il18r1	Plasma Membrane	transmembrane receptor		up	NA	NA	Th1	Yes
Il1r1	Plasma Membrane	transmembrane receptor	anakinra	down	NA	NA	Th17	Yes
Il1r2	Plasma Membrane	transmembrane receptor		NA	NA	down	Th17	Yes
Il1rl1	Plasma Membrane	transmembrane receptor		up	NA	NA	Th17	Yes
Il21	Extracellular Space	cytokine		down	down	NA	Tfh	Yes
Il23r	Plasma Membrane	transmembrane receptor		NA	NA	down	Th17	Yes
Il27ra	Plasma Membrane	transmembrane receptor		down	NA	NA	Th1	Yes
Il2ra	Plasma Membrane	transmembrane receptor	LMB-2, daclizumab, basiliximab, aldesleukin, denileukin diftitox	up	NA	NA	IL2	Yes
Il2rb	Plasma Membrane	transmembrane receptor	monoclonal antibody Mik-Beta-1, daclizumab, aldesleukin, denileukin diftitox	up	NA	NA	IL2	Yes
Il33	Extracellular Space	cytokine		NA	up	NA	Th2	Yes
Il4	Extracellular Space	cytokine		down	down	NA	Th2	Yes
Il4ra	Plasma Membrane	transmembrane receptor		down	down	NA	Th2	Yes
Il5	Extracellular Space	cytokine	mepolizumab, reslizumab	NA	down	NA	Th2	Yes
Il6	Extracellular Space	cytokine	tocilizumab, siltuximab	NA	down	NA	Cytokine	Yes
Il6ra	Plasma Membrane	transmembrane receptor	tocilizumab	down	down	NA	Th17	Yes
Il6st	Plasma Membrane	transmembrane receptor		down	NA	NA	Th17	Yes
Il7r	Plasma Membrane	transmembrane receptor	recombinant human interleukin-7	down	NA	NA	T cell differentiation	Yes
Ildr1	Plasma Membrane	transmembrane receptor		NA	up	NA	Unknown
Ilf2	Nucleus	transcription regulator		up	NA	NA	IL2	Yes
Inhba	Extracellular Space	growth factor		NA	NA	down	Growth factor
Insm1	Nucleus	transcription regulator		down	NA	NA	Development
Irf1	Nucleus	transcription regulator		NA	NA	NA	Type I IFN	Yes
Irf2bp2	Nucleus	transcription regulator		down	down	NA	Type I IFN	Yes
Irf6	Nucleus	transcription regulator		down	NA	NA	Type I IFN	Yes
Itga4	Plasma Membrane	transmembrane receptor	natalizumab, vedolizumab	up	NA	NA	Cell Migration
Itga5	Plasma Membrane	transmembrane receptor		down	NA	NA	Receptor
Itgam	Plasma Membrane	transmembrane receptor		up	NA	NA	Complement	Yes
Itgax	Plasma Membrane	transmembrane receptor		up	NA	NA	Cell Migration
Itgb7	Plasma Membrane	transmembrane receptor	vedolizumab	up	NA	NA	Cell Migration
Jag1	Extracellular Space	growth factor		NA	down	NA	Notch signalling
Jag2	Extracellular Space	growth factor		down	NA	NA	Notch signalling
Jarid2	Nucleus	transcription regulator		down	NA	NA	Chromatin remodelling
Jdp2	Nucleus	transcription regulator		NA	NA	up	TCR signalling	Yes
Jmy	Nucleus	transcription regulator		down	NA	NA	Many
Jun	Nucleus	transcription regulator		down	NA	NA	TCR signalling	Yes
Kdm5b	Nucleus	transcription regulator		down	NA	NA	Chromatin remodelling
Kiss1r	Plasma Membrane	G-protein coupled receptor		NA	up	NA	Cancer
Klf2	Nucleus	transcription regulator		down	NA	NA	T cell differentiation	Yes
Klf3	Nucleus	transcription regulator		NA	down	NA	Unknown
Klf7	Nucleus	transcription regulator		down	NA	NA	Transcription
Klra7	Plasma Membrane	transmembrane receptor		NA	NA	NA	Unknown
Klrb1a	Plasma Membrane	transmembrane receptor		NA	NA	NA	NK	Yes
Klrc2	Plasma Membrane	transmembrane receptor		up	NA	up	NK	Yes
Klrc3	Plasma Membrane	transmembrane receptor		NA	NA	NA	NK	Yes
Klrd1	Plasma Membrane	transmembrane receptor		up	NA	up	NK	Yes
Kmt2c	Nucleus	transcription regulator		NA	NA	NA	Chromatin remodelling
Kmt2d	Nucleus	transcription regulator		NA	NA	NA	Chromatin remodelling
Lair1	Plasma Membrane	transmembrane receptor		NA	down	NA	TCR signalling	Yes
Lef1	Nucleus	transcription regulator		down	NA	NA	Many
Lif	Extracellular Space	cytokine		down	down	NA	Treg	Yes
Litaf	Nucleus	transcription regulator		up	up	NA	Apoptosis
Lmbr1	Plasma Membrane	transmembrane receptor		down	NA	NA	Development
Lmo4	Nucleus	transcription regulator		down	down	down	T cell development	Yes
Lpar5	Plasma Membrane	G-protein coupled receptor		up	NA	NA	Receptor
Lpar6	Plasma Membrane	G-protein coupled receptor		down	NA	NA	Receptor
Lrp3	Plasma Membrane	transmembrane receptor		NA	up	NA	Unknown
Lsr	Nucleus	transcription regulator		up	up	NA	Metabolism
Lta	Extracellular Space	cytokine	etanercept	down	up	NA	Th cells	Yes
Ltb4r1	Plasma Membrane	G-protein coupled receptor	etalocib	NA	NA	down	Receptor
Ltbp4	Extracellular Space	growth factor		NA	up	NA	TGFb binding
Maf	Nucleus	transcription regulator		down	down	down	Maf	Yes
Maff	Nucleus	transcription regulator		down	NA	NA	M related	Yes
Mafg	Nucleus	transcription regulator		down	down	NA	M related	Yes
Maged1	Plasma Membrane	transcription regulator		down	NA	NA	Cancer
Maml3	Nucleus	transcription regulator		down	NA	NA	Notch signalling
Med30	Nucleus	transcription regulator		up	NA	NA	Transcription
Meis3	Nucleus	transcription regulator		down	NA	NA	Many
Mib2	Nucleus	transcription regulator		down	NA	NA	Notch signalling
Mrc2	Plasma Membrane	transmembrane receptor		NA	up	NA	Receptor
Mxd3	Nucleus	transcription regulator		up	NA	NA	Cell cycle
Mxd4	Nucleus	transcription regulator		down	NA	NA	Cell cycle
Mxi1	Nucleus	transcription regulator		up	NA	NA	Cell cycle
Myb	Nucleus	transcription regulator		down	down	NA	Cell cycle
Mybl1	Nucleus	transcription regulator		up	NA	NA	Cell cycle
Mybl2	Nucleus	transcription regulator		up	NA	NA	Cell cycle
Mycbp	Nucleus	transcription regulator		up	NA	NA	Cell cycle
Nacc2	Nucleus	transcription regulator		down	NA	NA	Chromatin remodelling
Nfat5	Nucleus	transcription regulator		down	NA	NA	TCR signalling	Yes
Nfatc1	Nucleus	transcription regulator		down	NA	NA	TCR signalling	Yes
Nfe2	Nucleus	transcription regulator		NA	up	NA	Erythroid differentiation
Nfe2l2	Nucleus	transcription regulator	RTA 408	down	NA	NA	Antioxidant response
Nfia	Nucleus	transcription regulator		down	NA	NA	RNA pol II Transcription
Nfix	Nucleus	transcription regulator		down	NA	NA	Transcription
Nfkb1	Nucleus	transcription regulator	dexamethasone/thalidomide, bortezomib/dexamethasone/thalidomide, rituximab/thalidomide, bortezomib/thalidomide, prednisone/thalidomide, triflusal, thalidomide	NA	NA	down	TCR signalling	Yes
Nfxl1	Nucleus	transcription regulator		up	NA	NA	Unknown
Npas4	Nucleus	transcription regulator		down	up	NA	Development
Nr1d1	Nucleus	ligand-dependent nuclear receptor		NA	NA	down	Circadian clock
Nr1d2	Nucleus	ligand-dependent nuclear receptor		down	down	NA	Circadian clock
Nradd	Extracellular Space	cytokine		up	NA	NA	Metabolism
Nrarp	Nucleus	transcription regulator		up	up	NA	Notch signalling
Nrip1	Nucleus	transcription regulator		down	NA	NA	Transcription
Nrp1	Plasma Membrane	transmembrane receptor		NA	up	NA	Cell Migration
Nupr1	Nucleus	transcription regulator		NA	NA	down	Stress response
Ogn	Extracellular Space	growth factor		NA	up	NA	Development
Olfr613	Plasma Membrane	G-protein coupled receptor		down	NA	NA	Receptor
P2ry10	Plasma Membrane	G-protein coupled receptor		NA	down	NA	Receptor
P2ry14	Plasma Membrane	G-protein coupled receptor		down	NA	NA	Receptor
P2ry2	Plasma Membrane	G-protein coupled receptor	suramin	NA	down	NA	Receptor
Pa2g4	Nucleus	transcription regulator		up	NA	NA	Many
Pbx1	Nucleus	transcription regulator		NA	up	NA	Transcription
Pbx3	Nucleus	transcription regulator		up	NA	NA	Transcription
Pcbp3	Nucleus	transcription regulator		down	NA	NA	RNA binding
Pdgfb	Extracellular Space	growth factor		up	up	NA	Growth factor
Per2	Nucleus	transcription regulator		down	NA	NA	Circadian clock
Pglyrp1	Plasma Membrane	transmembrane receptor		up	up	up	Receptor
Phf1	Nucleus	transcription regulator		down	NA	NA	Chromatin remodelling
Plagl1	Nucleus	transcription regulator		down	NA	NA	Transcription
Plaur	Plasma Membrane	transmembrane receptor		down	NA	NA	Receptor
Plxna2	Plasma Membrane	transmembrane receptor		down	NA	NA	Cell Migration
Plxna3	Plasma Membrane	transmembrane receptor		down	NA	NA	Development
Plxnb1	Plasma Membrane	transmembrane receptor		down	up	NA	Many
Plxnd1	Plasma Membrane	transmembrane receptor		down	down	NA	Cell Migration
Pmf1	Nucleus	transcription regulator		up	NA	NA	Cell cycle
Pold3	Nucleus	transcription regulator		up	NA	NA	DNA replication and repair
Polr3k	Nucleus	transcription regulator		up	NA	NA	Transcription
Pou2af1	Nucleus	transcription regulator		down	down	NA	Transcription
Pou2f2	Nucleus	transcription regulator		NA	up	NA	Transcription
Pou6f1	Nucleus	transcription regulator		down	down	NA	Unknown
Pparg	Nucleus	ligand-dependent nuclear receptor	icosapent, amlodipine/telmisartan, inolitazone, aleglitazar, aspirin/dipyridamole/telmisartan, clopidogrel/telmisartan, glimepiride/rosiglitazone, nicotinic acid/pioglitazone, alogliptin/pioglitazone, glimepiride/pioglitazone, rosiglitazone, farglitazar, sulfasalazine, pioglitazone, telmisartan, tesaglitazar, troglitazone, hydrochlorothiazide/telmisartan, balsalazide, mesalamine, bezafibrate	NA	up	NA	Treg	Yes
Ppargc1b	Nucleus	transcription regulator		down	NA	NA	Transcription
Prdm5	Nucleus	transcription regulator		NA	up	NA	Chromatin remodelling
Prox1	Nucleus	transcription regulator		NA	up	NA	Development
Psmc3ip	Nucleus	transcription regulator		up	NA	NA	Cell cycle
Ptch1	Plasma Membrane	transmembrane receptor		up	NA	NA	Development
Ptger2	Plasma Membrane	G-protein coupled receptor	misoprostol, prostaglandin E2, prostaglandin E1, CP 533536, diclofenac/misoprostol	down	NA	NA	Receptor
Ptgir	Plasma Membrane	G-protein coupled receptor	treprostinil, epoprostenol, selexipag, iloprost	up	NA	NA	Receptor
Pycard	Cytoplasm	transcription regulator		up	NA	NA	Many
Rad21	Nucleus	transcription regulator		up	NA	NA	Cell cycle
Rai14	Nucleus	transcription regulator		up	up	NA	Unknown
Rbbp7	Nucleus	transcription regulator		up	NA	NA	Cell cycle
Rbpms	Other	transcription regulator		NA	up	NA	TGFb signalling
Rcor2	Nucleus	transcription regulator		NA	NA	down	Transcription
Rora	Nucleus	ligand-dependent nuclear receptor		up	NA	NA	Th17	Yes
Rorc	Nucleus	ligand-dependent nuclear receptor		NA	down	down	Th17	Yes
Rreb1	Nucleus	transcription regulator		down	down	NA	TCR signalling	Yes
Runx3	Nucleus	transcription regulator		up	NA	NA	T cell differentiation	Yes
S1pr1	Plasma Membrane	G-protein coupled receptor	fingolimod phosphate	NA	down	NA	Cell Migration
S1pr2	Plasma Membrane	G-protein coupled receptor		down	NA	NA	Receptor
Sall2	Nucleus	transcription regulator		NA	up	NA	Development
Sbno2	Other	transcription regulator		NA	down	NA	Development
Scai	Nucleus	transcription regulator		down	NA	NA	Cell Migration
Scarf2	Plasma Membrane	transmembrane receptor		NA	up	NA	Receptor
Scg2	Extracellular Space	cytokine		NA	up	NA	Cytokine
Sell	Plasma Membrane	transmembrane receptor		down	NA	NA	Cell Migration
Siglece	Plasma Membrane	transmembrane receptor		NA	NA	NA	Receptor
Sigmar1	Plasma Membrane	transmembrane receptor	acetaminophen/pentazocine, dihydrocodeine, dextromethorphan/morphine, morphine/naltrexone, opipramol, dextromethorphan/quinidine, bupropion/naltrexone, etorphine, SA 4503, hydromorphone, naltrexone, dextromethorphan, oxycodone, pentazocine, naloxone, SR 31747, brompheniramine/dextromethorphan/pseudoephedrine, chlorpheniramine/dextromethorphan/phenylephrine, carbinoxamine/dextromethorphan/pseudoep…	up	NA	NA	Receptor
Slamf1	Plasma Membrane	transmembrane receptor		NA	down	NA	Tfh	Yes
Slamf6	Plasma Membrane	transmembrane receptor		down	NA	NA	Th17	Yes
Slf1	Nucleus	transcription regulator		NA	NA	NA	DNA replication and repair
Smo	Plasma Membrane	G-protein coupled receptor	vismodegib, saridegib, gemcitabine/vismodegib, erismodegib, erlotinib/vismodegib, taladegib	NA	down	NA	Receptor
Snai3	Nucleus	transcription regulator		up	up	NA	Development
Socs5	Extracellular Space	cytokine		NA	up	NA	Cytokine regulation	Yes
Sox13	Nucleus	transcription regulator		NA	up	NA	Development
Sp6	Nucleus	transcription regulator		NA	up	NA	Development
Ss18l1	Nucleus	transcription regulator		down	NA	NA	Transcription
Ssbp2	Nucleus	transcription regulator		down	NA	NA	DNA replication and repair
Stat2	Nucleus	transcription regulator		down	NA	NA	Th1	Yes
Stat4	Nucleus	transcription regulator		NA	down	NA	Th1	Yes
Sufu	Nucleus	transcription regulator		down	NA	NA	Transcription
Suv39h2	Nucleus	transcription regulator		up	NA	NA	Chromatin remodelling
Tada2a	Nucleus	transcription regulator		up	NA	NA	RNA pol II Transcription
Taf4b	Nucleus	transcription regulator		down	down	NA	Transcription
Tanc2	Nucleus	transcription regulator		up	NA	NA	Development
Tbx21	Nucleus	transcription regulator		up	NA	NA	Th1	Yes
Tbx6	Nucleus	transcription regulator		down	NA	NA	Development
Tcea2	Nucleus	transcription regulator		down	NA	NA	Transcription
Tcf19	Nucleus	transcription regulator		up	NA	NA	Development
Tcf7	Nucleus	transcription regulator		down	down	NA	Tfh	Yes
Tead3	Nucleus	transcription regulator		NA	up	NA	Many
Tef	Nucleus	transcription regulator		down	NA	NA	Development
Tfb1m	Cytoplasm	transcription regulator		up	NA	NA	Mitochondrial gene expression
Tfcp2l1	Nucleus	transcription regulator		NA	up	NA	Transcription
Tfdp1	Nucleus	transcription regulator		up	NA	NA	Cell cycle
Tgfa	Extracellular Space	growth factor		NA	up	NA	Growth factor
Tgfb1i1	Nucleus	transcription regulator		down	NA	NA	Transcription
Tgfb3	Extracellular Space	growth factor		down	down	NA	Treg	Yes
Thra	Nucleus	ligand-dependent nuclear receptor	3,5-diiodothyropropionic acid, denosumab/levothyroxine, amiodarone, levothyroxine, dextrothyroxine, L-triiodothyronine	down	NA	NA	Receptor
Thrb	Nucleus	ligand-dependent nuclear receptor	3,5-diiodothyropropionic acid, denosumab/levothyroxine, amiodarone, levothyroxine, dextrothyroxine, L-triiodothyronine	NA	NA	up	Receptor
Tle1	Nucleus	transcription regulator		down	down	NA	Chromatin remodelling
Tle4	Nucleus	transcription regulator		NA	down	NA	Transcription
Tlr1	Plasma Membrane	transmembrane receptor		down	NA	NA	Receptor
Tlr7	Plasma Membrane	transmembrane receptor	3M-001, UC-1V150, 5-fluorouracil/imiquimod, resiquimod, hydroxychloroquine, imiquimod	down	up	NA	Receptor
Tnf	Extracellular Space	cytokine	adalimumab, etanercept, infliximab, certolizumab, golimumab, infliximab/methotrexate, dexamethasone/thalidomide, dexamethasone/pomalidomide, cyclophosphamide/dexamethasone/thalidomide, golimumab/methotrexate, bortezomib/dexamethasone/thalidomide, rituximab/thalidomide, bortezomib/thalidomide, prednisone/thalidomide, adalimumab/methotrexate, pomalidomide, thalidomide	NA	up	NA	Th1	Yes
Tnfrsf11a	Plasma Membrane	transmembrane receptor		NA	up	NA	Receptor
Tnfrsf12a	Plasma Membrane	transmembrane receptor		down	down	NA	Unknown
Tnfrsf13b	Plasma Membrane	transmembrane receptor		down	NA	NA	Tfh	Yes
Tnfrsf13c	Plasma Membrane	transmembrane receptor		up	up	NA	Cell Survival
Tnfrsf14	Plasma Membrane	transmembrane receptor		down	NA	NA	Receptor
Tnfrsf19	Plasma Membrane	transmembrane receptor		NA	down	NA	Development
Tnfrsf22	Plasma Membrane	transmembrane receptor		down	NA	NA	Unknown
Tnfsf10	Extracellular Space	cytokine		up	up	NA	Apoptosis
Tnfsf11	Extracellular Space	cytokine	lenalidomide, denosumab, lenalidomide/temsirolimus, dexamethasone/lenalidomide/sorafenib, dexamethasone/lenalidomide, bortezomib/dexamethasone/lenalidomide, carfilzomib/dexamethasone/lenalidomide, lenalidomide/rituximab, denosumab/levothyroxine, erythropoietin/lenalidomide	down	NA	NA	Many
Tnfsf13b	Extracellular Space	cytokine	belimumab	NA	up	NA	Cytokine	Yes
Tnfsf14	Extracellular Space	cytokine		down	NA	NA	Cell cycle
Tnfsf8	Plasma Membrane	cytokine		down	NA	down	Cytokine
Tox2	Nucleus	transcription regulator		down	NA	NA	Unknown
Trip13	Cytoplasm	transcription regulator		up	NA	NA	DNA replication and repair
Trip6	Extracellular Space	cytokine		down	NA	up	Signalling
Trp73	Nucleus	transcription regulator		NA	down	NA	Apoptosis
Tsc22d1	Nucleus	transcription regulator		down	NA	NA	Cancer
Tsc22d3	Nucleus	transcription regulator		down	NA	NA	Metabolism
Ttf2	Cytoplasm	transcription regulator		up	NA	NA	RNA pol II Transcription
Tulp4	Cytoplasm	transcription regulator		up	NA	NA	Unknown
Uhrf1	Nucleus	transcription regulator		up	NA	NA	Cell cycle
Ulbp1	Plasma Membrane	transmembrane receptor		up	NA	NA	NK	Yes
Unc5a	Plasma Membrane	transmembrane receptor		down	down	NA	Cytoskeleton
Utrn	Plasma Membrane	transmembrane receptor		down	NA	NA	Cytoskeleton
Vcam1	Plasma Membrane	transmembrane receptor		down	up	NA	Adhesion
Vdr	Nucleus	transcription regulator	calcipotriene, ergocalciferol, ILX-23-7553, alendronate/cholecalciferol, 2-(3-hydroxypropoxy)calcitriol, betamethasone dipropionate/calcipotriene, alfacalcidol, calcium carbonate/cholecalciferol, paricalcitol, doxercalciferol, cholecalciferol, calcitriol, calcifediol	NA	down	down	Receptor
Vipr1	Plasma Membrane	G-protein coupled receptor		down	down	NA	Receptor
Vipr2	Plasma Membrane	G-protein coupled receptor		NA	up	NA	Receptor
Xbp1	Nucleus	transcription regulator		up	NA	NA	Many
Xcl1	Extracellular Space	cytokine		NA	NA	up	Receptor
Xcr1	Plasma Membrane	G-protein coupled receptor		NA	up	NA	Receptor
Ybx3	Nucleus	transcription regulator		NA	NA	NA	Development
Ywhah	Cytoplasm	transcription regulator		up	NA	NA	Many
Zbtb16	Nucleus	transcription regulator		down	NA	NA	Development
Zbtb18	Nucleus	transcription regulator		NA	NA	NA	Development
Zbtb20	Nucleus	transcription regulator		down	NA	NA	Unknown
Zbtb32	Nucleus	transcription regulator		up	up	NA	Unknown
Zbtb4	Nucleus	transcription regulator		down	NA	NA	Tfh	Yes
Zeb2	Nucleus	transcription regulator		NA	NA	down	Transcription
Zfp110	Nucleus	transcription regulator		NA	NA	NA	Chromatin remodelling
Zfp12	Nucleus	transcription regulator		down	NA	NA	Development
Zfp217	Nucleus	transcription regulator		down	NA	NA	Cell cycle
Zfp281	Nucleus	transcription regulator		down	down	NA	Development
Zfp292	Nucleus	transcription regulator		down	NA	NA	Unknown
Zfp36	Nucleus	transcription regulator		down	NA	NA	RNA binding
Zfp367	Nucleus	transcription regulator		up	NA	NA	Unknown
Zfp36l1	Nucleus	transcription regulator		down	NA	NA	Unknown
Zfp536	Other	transcription regulator		NA	up	NA	Histone modification
Zfp90	Nucleus	transcription regulator		NA	NA	NA	Development
Zhx2	Nucleus	transcription regulator		down	NA	NA	Unknown
Zkscan1	Nucleus	transcription regulator		down	NA	NA	Development
Zkscan14	Nucleus	transcription regulator		down	NA	NA	Unknown
Zmym5	Nucleus	transcription regulator		down	NA	NA	Unknown
Znhit3	Nucleus	transcription regulator		up	NA	NA	Unknown
Zscan10	Nucleus	transcription regulator		down	down	NA	Development
Zscan12	Nucleus	transcription regulator		down	NA	NA	Unknown
Zscan2	Nucleus	transcription regulator		down	NA	NA	Unknown
Zscan26	Nucleus	transcription regulator		NA	NA	NA	Unknown

## Sheet: Edges
col1	mynetwork...2.	col2	maf
Actn1	protein-protein interactions	Actn1
Adrb2	inhibition	Adrb2
Adrb2	protein-protein interactions	Adrb2
Aff1	protein-protein interactions	Aff1
Aff3	protein-protein interactions	Aff1
Aff4	protein-protein interactions	Aff1
Aff4	protein-protein interactions	Aff3
Ager	protein-protein interactions	Ager
Ager	protein-protein interactions	Hcst
Ahr	activation	Ahr
Ahr	expression	Actn1
Ahr	expression	Areg
Ahr	expression	Ccne1
Ahr	expression	Cdkn2d
Ahr	expression	Cebpa
Ahr	expression	Cxcl10
Ahr	expression	E2f1
Ahr	expression	E2f8
Ahr	expression	Edn1
Ahr	expression	Fas
Ahr	expression	Fasl
Ahr	expression	Fos
Ahr	expression	Foxp3
Ahr	expression	Fzd7
Ahr	expression	Il17a
Ahr	expression	Il17f
Ahr	expression	Il21
Ahr	expression	Il6
Ahr	expression	Irf1
Ahr	expression	Itga5
Ahr	expression	Itgam
Ahr	expression	Jag1
Ahr	expression	Jun
Ahr	expression	Klf2
Ahr	expression	Nfe2l2
Ahr	expression	Pdgfb
Ahr	expression	Plxna2
Ahr	expression	Pparg
Ahr	expression	Tgfb3
Ahr	expression	Tnf
Ahr	expression	Tnfrsf19
Ahr	expression	Trp73
Ahr	protein-DNA interactions	Ccl1
Ahr	protein-DNA interactions	Ccne1
Ahr	protein-DNA interactions	Fas
Ahr	protein-DNA interactions	Ighm
Ahr	protein-DNA interactions	Il10
Ahr	protein-DNA interactions	Il21
Ahr	protein-DNA interactions	Il6
Ahr	protein-DNA interactions	Nfe2l2
Ahr	protein-protein interactions	Ahr
Ahr	protein-protein interactions	Arnt2
Ahr	protein-protein interactions	E2f1
Ahr	transcription	Il10
Ahr	transcription	Il21
Ahr	translocation	Ahr
Antxr1	protein-protein interactions	Antxr1
Apbb1	protein-protein interactions	Apbb1
Apbb1	transcription	Trp73
Areg	protein-protein interactions	Areg
Arid3a	activation	E2f1
Arid3a	expression	Ccne1
Arid3a	protein-protein interactions	Arid3a
Arid3a	protein-protein interactions	E2f1
Arnt2	expression	Ager
Arnt2	expression	Arnt2
Arnt2	expression	Ccr1l1
Arnt2	expression	Chrm4
Arnt2	expression	Cxcr5
Arnt2	expression	Elk4
Arnt2	expression	Gtf3a
Arnt2	expression	Ifi204
Arnt2	expression	Il5
Arnt2	expression	Il6ra
Arnt2	expression	Nfe2
Arnt2	expression	Thrb
Arnt2	expression	Tnf
Arnt2	expression	Tsc22d3
Arnt2	expression	Zfp36l1
Arnt2	protein-protein interactions	Ahr
Arnt2	protein-protein interactions	Arnt2
Asb2	protein-protein interactions	Asb2
Atn1	expression	Basp1
Atn1	expression	Bcl6
Atn1	expression	Bhlhe40
Atn1	expression	Dbp
Atn1	expression	Gas7
Atn1	expression	Ifi204
Atn1	expression	Thra
Atn1	protein-protein interactions	Atn1
Bach1	inhibition	Nfe2l2
Bach1	protein-protein interactions	Bach1
Bach1	protein-protein interactions	Nfe2l2
Bach2	expression	Foxp3
Bach2	expression	Gata1
Bach2	expression	Id3
Bach2	expression	Il10
Bach2	expression	Il17a
Bach2	expression	Il4
Bach2	expression	Il5
Bach2	expression	Il6
Bach2	expression	Lef1
Bach2	expression	Rorc
Bach2	expression	Tbx21
Bach2	expression	Xbp1
Bach2	protein-protein interactions	Bach2
Bard1	activation	Brca1
Bard1	expression	Brca1
Bard1	inhibition	Bard1
Bard1	protein-DNA interactions	Brca1
Bard1	protein-protein interactions	Bach1
Bard1	protein-protein interactions	Bard1
Bard1	protein-protein interactions	Brca1
Bard1	protein-protein interactions	Brca2
Bard1	ubiquitination	Brca1
Batf3	protein-protein interactions	Bach2
Batf3	protein-protein interactions	Batf3
Bcl6	expression	Bach2
Bcl6	expression	Bcl6
Bcl6	expression	Ccl3
Bcl6	expression	Ccl4
Bcl6	expression	Ccr8
Bcl6	expression	Cd80
Bcl6	expression	Csf1
Bcl6	expression	Ctla4
Bcl6	expression	Cxcl10
Bcl6	expression	Cxcr5
Bcl6	expression	Ebi3
Bcl6	expression	Fas
Bcl6	expression	Foxp3
Bcl6	expression	Il10
Bcl6	expression	Il17a
Bcl6	expression	Il18
Bcl6	expression	Il2ra
Bcl6	expression	Il4
Bcl6	expression	Il4ra
Bcl6	expression	Il5
Bcl6	expression	Il6
Bcl6	expression	Il6ra
Bcl6	expression	Il7r
Bcl6	expression	Litaf
Bcl6	expression	Maf
Bcl6	expression	Myb
Bcl6	expression	Nfkb1
Bcl6	expression	Xbp1
Bcl6	protein-DNA interactions	Bcl6
Bcl6	protein-DNA interactions	Ccr7
Bcl6	protein-DNA interactions	Fcgrt
Bcl6	protein-DNA interactions	Il18
Bcl6	protein-DNA interactions	Il2rb
Bcl6	protein-DNA interactions	Il4ra
Bcl6	protein-DNA interactions	Il5
Bcl6	protein-DNA interactions	Nfkb1
Bcl6	protein-DNA interactions	Rorc
Bcl6	protein-DNA interactions	Tbx21
Bcl6	protein-DNA interactions	Tnfrsf14
Bcl6	protein-protein interactions	Arnt2
Bcl6	protein-protein interactions	Bach2
Bcl6	protein-protein interactions	Bcl6
Bcl6	protein-protein interactions	Tbx21
Bcl6	transcription	Bcl6
Bcl6	transcription	Cd80
Bcl6	transcription	Ciita
Bcl6	transcription	Il5
Bcl6	transcription	Nfkb1
Bcl6	transcription	Xbp1
Bhlhe40	expression	Il2ra
Bhlhe40	protein-protein interactions	Bhlhe40
Bmp7	protein-protein interactions	Bmp7
Brca1	activation	Bard1
Brca1	activation	Brca1
Brca1	activation	Igf1r
Brca1	expression	Areg
Brca1	expression	Brca1
Brca1	expression	Brca2
Brca1	expression	Ccne1
Brca1	expression	Fas
Brca1	expression	Igf1r
Brca1	expression	Nfe2l2
Brca1	inhibition	Bard1
Brca1	inhibition	Brca1
Brca1	protein-DNA interactions	Areg
Brca1	protein-DNA interactions	Bach1
Brca1	protein-DNA interactions	Brca1
Brca1	protein-DNA interactions	H2afx
Brca1	protein-RNA interactions	Bach1
Brca1	protein-protein interactions	Ahr
Brca1	protein-protein interactions	Bach1
Brca1	protein-protein interactions	Bard1
Brca1	protein-protein interactions	Brca1
Brca1	protein-protein interactions	Brca2
Brca1	protein-protein interactions	Ccne1
Brca1	protein-protein interactions	H2afx
Brca1	protein-protein interactions	Nfe2l2
Brca1	transcription	Brca1
Brca1	transcription	Tnf
Brca1	ubiquitination	Bard1
Brca1	ubiquitination	Brca1
Brca2	protein-protein interactions	Bach1
Brca2	protein-protein interactions	Bard1
Brca2	protein-protein interactions	Brca1
Bhlhe41	protein-protein interactions	Bhlhe40
Bhlhe41	protein-protein interactions	Bhlhe41
C1qbp	expression	C1qbp
C1qbp	protein-protein interactions	Adrb2
C1qbp	protein-protein interactions	C1qbp
Calcoco1	protein-protein interactions	Ahr
Calcrl	protein-protein interactions	Calcrl
Calr	expression	Cebpa
Calr	protein-RNA interactions	Cebpa
Calr	protein-protein interactions	Calr
Calr	protein-protein interactions	Cebpa
Cbx1	protein-DNA interactions	Foxp3
Cbx1	protein-protein interactions	Bard1
Cbx1	protein-protein interactions	Brca1
Cbx1	protein-protein interactions	Brwd1
Cbx1	protein-protein interactions	Cbx1
Cbx3	protein-DNA interactions	E2f1
Cbx3	protein-DNA interactions	Foxp3
Cbx3	protein-protein interactions	Bard1
Cbx3	protein-protein interactions	Brca1
Cbx3	protein-protein interactions	Cbx1
Cbx3	protein-protein interactions	Cbx3
Cbx3	protein-protein interactions	Tfdp1
Cbx5	expression	Lef1
Cbx5	expression	Pparg
Cbx5	expression	Rora
Cbx5	expression	Tle4
Cbx5	protein-protein interactions	Bard1
Cbx5	protein-protein interactions	Brca1
Cbx5	protein-protein interactions	Cbx1
Cbx5	protein-protein interactions	Cbx3
Cbx5	protein-protein interactions	Cbx5
Ccl1	activation	Ccr8
Ccl1	protein-protein interactions	Ccr8
Ccl4	activation	Ccr5
Ccl4	inhibition	Ccr5
Ccl4	protein-protein interactions	Ccl4
Ccl4	protein-protein interactions	Ccr5
Ccl4	translocation	Ccl4
Ccne1	activation	Bard1
Ccne1	activation	Brca1
Ccne1	activation	Ccne1
Ccne1	activation	E2f1
Ccne1	expression	Bard1
Ccne1	expression	Brca1
Ccne1	expression	Ccne1
Ccne1	expression	E2f1
Ccne1	protein-protein interactions	Brca1
Ccne1	protein-protein interactions	E2f1
Ccr1l1	protein-protein interactions	Ccl1
Ccr1l1	protein-protein interactions	Ccl3
Ccr1l1	protein-protein interactions	Ccl4
Ccr1l1	translocation	Ccr1l1
Ccr2	protein-protein interactions	Ccl3
Ccr2	protein-protein interactions	Ccl4
Ccr5	activation	Ccl3
Ccr5	activation	Ccr5
Ccr5	protein-protein interactions	Ccl3
Ccr5	protein-protein interactions	Ccl4
Ccr5	protein-protein interactions	Ccr2
Ccr5	protein-protein interactions	Ccr5
Ccr5	translocation	Ccr5
Ccr7	protein-protein interactions	Adrb2
Ccr8	protein-protein interactions	Ccl1
Cd40	activation	Cd40
Cd40	activation	Irf1
Cd40	activation	Nfkb1
Cd40	protein-DNA interactions	Irf1
Cd40	protein-DNA interactions	Tnfsf13b
Cd40	protein-protein interactions	Calr
Cd40	protein-protein interactions	Cd40
Cd80	protein-protein interactions	Cd80
Cdkn2d	protein-protein interactions	Brca1
Cebpa	activation	Cebpa
Cebpa	activation	Pparg
Cebpa	expression	Btg1
Cebpa	expression	Ccl4
Cebpa	expression	Ccr1l1
Cebpa	expression	Cebpa
Cebpa	expression	Fos
Cebpa	expression	Gtf3a
Cebpa	expression	Hmga1-rs1
Cebpa	expression	Il6
Cebpa	expression	Il6ra
Cebpa	expression	Irf6
Cebpa	expression	Itgam
Cebpa	expression	Jun
Cebpa	expression	Klrc3
Cebpa	expression	Litaf
Cebpa	expression	Nfatc1
Cebpa	expression	Nrp1
Cebpa	expression	Plxnd1
Cebpa	expression	Pparg
Cebpa	expression	Rora
Cebpa	expression	Runx3
Cebpa	expression	Thra
Cebpa	expression	Thrb
Cebpa	expression	Tnfrsf11a
Cebpa	expression	Tnfrsf19
Cebpa	expression	Tnfsf10
Cebpa	expression	Tsc22d3
Cebpa	expression	Vdr
Cebpa	protein-DNA interactions	Cebpa
Cebpa	protein-DNA interactions	Csf1
Cebpa	protein-DNA interactions	E2f1
Cebpa	protein-DNA interactions	Foxm1
Cebpa	protein-DNA interactions	Hgf
Cebpa	protein-DNA interactions	Il10
Cebpa	protein-DNA interactions	Il6
Cebpa	protein-DNA interactions	Itgax
Cebpa	protein-DNA interactions	Mybl2
Cebpa	protein-DNA interactions	Pparg
Cebpa	protein-DNA interactions	Vdr
Cebpa	protein-RNA interactions	Calr
Cebpa	protein-protein interactions	Actn1
Cebpa	protein-protein interactions	Batf3
Cebpa	protein-protein interactions	Bhlhe41
Cebpa	protein-protein interactions	C1qbp
Cebpa	protein-protein interactions	Calr
Cebpa	protein-protein interactions	Cbx5
Cebpa	protein-protein interactions	Cebpa
Cebpa	protein-protein interactions	E2f1
Cebpa	protein-protein interactions	Fos
Cebpa	protein-protein interactions	Jun
Cebpa	protein-protein interactions	Myb
Cebpa	protein-protein interactions	Nfatc1
Cebpa	protein-protein interactions	Pparg
Cebpa	protein-protein interactions	Tsc22d3
Cebpa	protein-protein interactions	Vdr
Cebpa	transcription	Cebpa
Cebpa	transcription	Csf1
Cebpa	transcription	Il10
Cebpa	transcription	Il4
Cebpa	transcription	Il6
Cebpa	transcription	Itgax
Cebpa	transcription	Jun
Cebpa	transcription	Pparg
Cebpa	transcription	Vdr
Chrm4	protein-protein interactions	Chrm4
Ciita	expression	Fasl
Ciita	expression	H2-Oa
Ciita	expression	H2-Ob
Ciita	expression	H2-Aa
Ciita	expression	Il10
Ciita	expression	Il4
Ciita	expression	Il5
Ciita	inhibition	Il4
Ciita	protein-DNA interactions	H2-DMb2
Ciita	protein-protein interactions	Ciita
Ciita	transcription	Fasl
Ciita	transcription	Il10
Ciita	transcription	Il4
Cited4	protein-protein interactions	Ciita
Ckap5	expression	Ckap5
Ckap5	protein-protein interactions	Ckap5
Creb3l1	protein-protein interactions	Batf3
Creb3l1	protein-protein interactions	Hc
Creb3l1	protein-protein interactions	Creb3l1
Csf1	activation	Csf1
Csf1	translocation	Csf1
Ctla4	inhibition	Cd80
Ctla4	protein-protein interactions	Cd80
Ctla4	protein-protein interactions	Ctla4
Ctla4	translocation	Ctla4
Cxcl10	activation	Cxcr3
Cxcl10	protein-protein interactions	Cxcl10
Cxcl10	protein-protein interactions	Cxcr3
Cxcl10	translocation	Cxcl10
Cxcl3	protein-protein interactions	Cxcl3
Cxcr3	protein-protein interactions	Cxcl10
Cxcr5	protein-protein interactions	Ccl4
Cysltr2	protein-protein interactions	Cysltr1
Dag1	protein-protein interactions	Actn1
Dag1	protein-protein interactions	Dag1
Dbp	protein-protein interactions	Batf3
Dbp	protein-protein interactions	Cebpa
Dbp	protein-protein interactions	Dbp
Dbp	protein-protein interactions	Hlf
Dcaf6	protein-protein interactions	Dcaf6
Ddx20	protein-protein interactions	Bard1
Ddx20	protein-protein interactions	Ddx20
Dek	protein-protein interactions	Cebpa
Dkk3	protein-protein interactions	Apbb1
E2f1	activation	Ccne1
E2f1	activation	E2f1
E2f1	expression	Calr
E2f1	expression	Ccne1
E2f1	expression	Cdkn2d
E2f1	expression	E2f1
E2f1	expression	Ezh2
E2f1	expression	Fos
E2f1	expression	Hmgb2
E2f1	expression	Id3
E2f1	expression	Jag2
E2f1	expression	Jmy
E2f1	expression	Mybl2
E2f1	expression	Nrip1
E2f1	expression	Nrp1
E2f1	expression	Tfdp1
E2f1	expression	Trp73
E2f1	expression	Vcam1
E2f1	expression	Zfp36
E2f1	protein-DNA interactions	Brca1
E2f1	protein-DNA interactions	Cbx5
E2f1	protein-DNA interactions	Ccne1
E2f1	protein-DNA interactions	Cebpa
E2f1	protein-DNA interactions	E2f1
E2f1	protein-DNA interactions	E2f8
E2f1	protein-DNA interactions	Fas
E2f1	protein-DNA interactions	Hmgn1
E2f1	protein-DNA interactions	Id3
E2f1	protein-DNA interactions	Jmy
E2f1	protein-DNA interactions	Maf
E2f1	protein-DNA interactions	Myb
E2f1	protein-DNA interactions	Mybl2
E2f1	protein-DNA interactions	Nrp1
E2f1	protein-DNA interactions	Pa2g4
E2f1	protein-DNA interactions	Tfdp1
E2f1	protein-DNA interactions	Tnf
E2f1	protein-DNA interactions	Trp73
E2f1	protein-DNA interactions	Uhrf1
E2f1	protein-protein interactions	Ahr
E2f1	protein-protein interactions	Arid3a
E2f1	protein-protein interactions	Brca1
E2f1	protein-protein interactions	Cbx5
E2f1	protein-protein interactions	Ccne1
E2f1	protein-protein interactions	Cebpa
E2f1	protein-protein interactions	E2f2
E2f1	protein-protein interactions	Mybl2
E2f1	protein-protein interactions	Nrip1
E2f1	protein-protein interactions	Pa2g4
E2f1	protein-protein interactions	Tfdp1
E2f1	transcription	Brca1
E2f1	transcription	Ccne1
E2f1	transcription	E2f1
E2f1	transcription	E2f2
E2f1	transcription	Foxm1
E2f1	transcription	Gmnn
E2f1	transcription	Mybl2
E2f1	transcription	Nrp1
E2f1	transcription	Trp73
E2f1	transcription	Ybx3
E2f2	expression	Ccne1
E2f2	expression	Cdkn2d
E2f2	expression	Ezh2
E2f2	protein-DNA interactions	Ccne1
E2f2	protein-DNA interactions	E2f1
E2f2	protein-DNA interactions	Jmy
E2f2	protein-DNA interactions	Myb
E2f2	protein-DNA interactions	Mybl2
E2f2	protein-DNA interactions	Tfdp1
E2f2	protein-protein interactions	Ahr
E2f2	protein-protein interactions	Arid3a
E2f2	protein-protein interactions	Cebpa
E2f2	protein-protein interactions	E2f1
E2f2	protein-protein interactions	Mybl2
E2f2	protein-protein interactions	Tfdp1
E2f7	protein-DNA interactions	E2f1
E2f7	protein-DNA interactions	E2f8
E2f7	protein-protein interactions	E2f7
E2f7	protein-protein interactions	E2f8
E2f7	transcription	E2f2
E2f8	protein-DNA interactions	E2f1
E2f8	protein-protein interactions	E2f7
E2f8	protein-protein interactions	E2f8
Edn1	activation	Jun
Edn1	protein-protein interactions	Edn1
Edn1	reaction	Edn1
Edn1	translocation	Edn1
Egr3	activation	Jun
Egr3	expression	Apbb1
Egr3	expression	Bcl6
Egr3	expression	Fasl
Egr3	expression	Plxnd1
Egr3	expression	Rorc
Egr3	expression	Zfp292
Egr3	protein-DNA interactions	Fasl
Egr3	protein-DNA interactions	Tnfsf11
Egr3	protein-protein interactions	Ddx20
Egr3	transcription	Fasl
Egr3	transcription	Jun
Elk4	expression	Fos
Elk4	protein-DNA interactions	Egr3
Elk4	protein-DNA interactions	Fos
Elk4	protein-protein interactions	Brca1
Elk4	transcription	Fos
Eomes	expression	Il2rb
Eomes	expression	Il5
Eomes	expression	Klra7
Eomes	expression	Tnfsf10
Epas1	activation	Epas1
Epas1	expression	Areg
Epas1	expression	Bhlhe40
Epas1	expression	Ccr2
Epas1	expression	Ccr5
Epas1	expression	Cxcl3
Epas1	expression	Edn1
Epas1	expression	Fos
Epas1	expression	Il6
Epas1	expression	Maff
Epas1	expression	Nrarp
Epas1	expression	Pparg
Epas1	expression	Tgfa
Epas1	expression	Tgfb3
Epas1	protein-protein interactions	Arnt2
Epas1	protein-protein interactions	Batf3
Epas1	protein-protein interactions	Dbp
Epas1	protein-protein interactions	Epas1
Epas1	transcription	Areg
Ezh2	activation	Brca1
Ezh2	expression	Brca1
Ezh2	expression	Cxcl10
Ezh2	expression	Cxcl3
Ezh2	expression	E2f1
Ezh2	expression	Eomes
Ezh2	expression	Ezh2
Ezh2	expression	Il17a
Ezh2	expression	Il4
Ezh2	expression	Il5
Ezh2	expression	Il6
Ezh2	expression	Tbx21
Ezh2	expression	Tnf
Ezh2	protein-DNA interactions	Adrb2
Ezh2	protein-DNA interactions	Bmp7
Ezh2	protein-DNA interactions	Ccr5
Ezh2	protein-DNA interactions	Cxcr3
Ezh2	protein-DNA interactions	E2f1
Ezh2	protein-DNA interactions	Epas1
Ezh2	protein-DNA interactions	Foxp3
Ezh2	protein-DNA interactions	Il10
Ezh2	protein-DNA interactions	Il18r1
Ezh2	protein-DNA interactions	Il4
Ezh2	protein-DNA interactions	Il5
Ezh2	protein-DNA interactions	Il6
Ezh2	protein-DNA interactions	Kmt2c
Ezh2	protein-DNA interactions	Per2
Ezh2	protein-DNA interactions	Tbx21
Ezh2	protein-DNA interactions	Tnf
Ezh2	protein-protein interactions	Actn1
Ezh2	protein-protein interactions	Bhlhe40
Ezh2	protein-protein interactions	Brca1
Ezh2	protein-protein interactions	Cbx1
Ezh2	protein-protein interactions	Cited4
Ezh2	protein-protein interactions	Ezh2
Ezh2	protein-protein interactions	Hdac2
Ezh2	protein-protein interactions	Jarid2
Ezh2	protein-protein interactions	Phf1
Ezh2	protein-protein interactions	Rbbp7
Ezh2	transcription	Per2
F2r	activation	F2r
F2r	protein-DNA interactions	F2r
F2r	protein-protein interactions	Cxcr5
F2r	protein-protein interactions	F2r
F2rl1	protein-protein interactions	F2r
F2rl2	activation	F2rl3
F2rl2	protein-protein interactions	F2r
F2rl2	protein-protein interactions	F2rl1
F2rl2	protein-protein interactions	F2rl2
F2rl2	protein-protein interactions	F2rl3
F2rl3	protein-protein interactions	F2r
F2rl3	protein-protein interactions	F2rl2
F2rl3	protein-protein interactions	F2rl3
F3	activation	F3
F3	protein-protein interactions	F3
F3	reaction	F3
F3	translocation	F3
Fam3c	protein-protein interactions	Creb3l1
Fas	activation	Nfkb1
Fas	protein-RNA interactions	Fasl
Fas	protein-protein interactions	Cd40
Fas	protein-protein interactions	Fas
Fas	protein-protein interactions	Fasl
Fasl	activation	Fas
Fasl	activation	Lef1
Fasl	inhibition	Fasl
Fasl	protein-RNA interactions	Fas
Fasl	protein-protein interactions	Calr
Fasl	protein-protein interactions	Fas
Fasl	protein-protein interactions	Fasl
Fasl	protein-protein interactions	Lef1
Fcgrt	protein-protein interactions	Calr
Fcgrt	protein-protein interactions	Fcgrt
Fos	activation	Ccne1
Fos	activation	Nfatc1
Fos	expression	Aff4
Fos	expression	Arid3a
Fos	expression	Ccne1
Fos	expression	Fos
Fos	expression	Hmmr
Fos	expression	Il10
Fos	expression	Il1rl1
Fos	expression	Jun
Fos	expression	Nfatc1
Fos	expression	Nfe2l2
Fos	expression	Nrip1
Fos	expression	Rbbp7
Fos	expression	Tnfrsf11a
Fos	expression	Utrn
Fos	expression	Zhx2
Fos	inhibition	Nfe2l2
Fos	protein-DNA interactions	Edn1
Fos	protein-DNA interactions	F3
Fos	protein-DNA interactions	Fasl
Fos	protein-DNA interactions	Fos
Fos	protein-DNA interactions	Il6
Fos	protein-DNA interactions	Jun
Fos	protein-DNA interactions	Tnf
Fos	protein-DNA interactions	Tnfsf11
Fos	protein-RNA interactions	Maf
Fos	protein-protein interactions	Bach1
Fos	protein-protein interactions	Cebpa
Fos	protein-protein interactions	Fos
Fos	protein-protein interactions	Jun
Fos	protein-protein interactions	Maf
Fos	protein-protein interactions	Nfatc1
Fos	protein-protein interactions	Nfe2l2
Fos	protein-protein interactions	Nrip1
Fos	protein-protein interactions	Tnf
Fos	transcription	F3
Fos	transcription	Fos
Fos	transcription	Jun
Fos	transcription	Nfatc1
Fos	transcription	Plagl1
Fos	transcription	Plaur
Fos	transcription	Vcam1
Foxb1	protein-protein interactions	Arid3a
Foxb1	protein-protein interactions	Foxb1
Foxm1	activation	Foxm1
Foxm1	expression	Ccne1
Foxm1	expression	Cxcr3
Foxm1	expression	Il6
Foxm1	expression	Plaur
Foxm1	expression	Ptch1
Foxm1	expression	Zeb2
Foxm1	protein-DNA interactions	Lef1
Foxm1	protein-DNA interactions	Plaur
Foxm1	protein-protein interactions	Bcl6
Foxm1	protein-protein interactions	Ccne1
Foxm1	protein-protein interactions	Depdc1a
Foxm1	protein-protein interactions	Foxm1
Foxm1	transcription	Fos
Foxm1	transcription	Plaur
Foxp3	activation	Rora
Foxp3	activation	Rorc
Foxp3	expression	Brca1
Foxp3	expression	Ccr2
Foxp3	expression	Ctla4
Foxp3	expression	Fasl
Foxp3	expression	Foxp3
Foxp3	expression	Gpr83
Foxp3	expression	Icos
Foxp3	expression	Il10
Foxp3	expression	Il17a
Foxp3	expression	Il1rl1
Foxp3	expression	Il2ra
Foxp3	expression	Il4
Foxp3	expression	Il7r
Foxp3	expression	Jmy
Foxp3	expression	Nrp1
Foxp3	expression	Plagl1
Foxp3	expression	Pold3
Foxp3	expression	Sell
Foxp3	inhibition	Il17a
Foxp3	protein-DNA interactions	Brca1
Foxp3	protein-DNA interactions	Ctla4
Foxp3	protein-DNA interactions	Cysltr1
Foxp3	protein-DNA interactions	Ikzf2
Foxp3	protein-DNA interactions	Il17ra
Foxp3	protein-DNA interactions	Il21
Foxp3	protein-DNA interactions	Il2ra
Foxp3	protein-DNA interactions	Il6
Foxp3	protein-DNA interactions	Il7r
Foxp3	protein-DNA interactions	Maf
Foxp3	protein-DNA interactions	Nfkb1
Foxp3	protein-protein interactions	Ckap5
Foxp3	protein-protein interactions	Foxp3
Foxp3	protein-protein interactions	Foxp1
Foxp3	protein-protein interactions	Rora
Foxp3	protein-protein interactions	Rorc
Foxp3	transcription	Brca1
Foxp3	transcription	Il4
Foxp1	expression	Hopx
Foxp1	protein-protein interactions	Foxp1
Gabbr1	activation	Gabbr1
Gabbr1	protein-protein interactions	Gabbr1
Gas7	protein-protein interactions	Gas7
Gata1	activation	Myb
Gata1	expression	Actn1
Gata1	expression	Cdkn2d
Gata1	expression	Cir1
Gata1	expression	Gata1
Gata1	expression	Il1rl1
Gata1	expression	Itgax
Gata1	expression	Myb
Gata1	expression	Nfe2
Gata1	expression	Tgfb1i1
Gata1	protein-DNA interactions	Ccr1l1
Gata1	protein-DNA interactions	Cebpa
Gata1	protein-DNA interactions	Gata1
Gata1	protein-DNA interactions	Il1rl1
Gata1	protein-DNA interactions	Il4
Gata1	protein-DNA interactions	Il6ra
Gata1	protein-DNA interactions	Il6st
Gata1	protein-DNA interactions	Il7r
Gata1	protein-DNA interactions	Nfe2
Gata1	protein-DNA interactions	Plxna2
Gata1	protein-protein interactions	E2f2
Gata1	protein-protein interactions	Gata1
Gata1	protein-protein interactions	Myb
Gata1	transcription	Gata1
Gata1	transcription	Il1rl1
Gata1	transcription	Myb
Gata1	transcription	Nfe2
Glis2	expression	Cxcl10
Gmnn	expression	Eomes
Gmnn	expression	Inhba
Gmnn	expression	Nrp1
Gmnn	expression	Tnfrsf19
Gmnn	protein-protein interactions	Brca1
Gmnn	protein-protein interactions	Gmnn
Gpc1	protein-protein interactions	Cbx1
Gprc5b	protein-protein interactions	Adrb2
Grm6	protein-protein interactions	Grm6
Grn	protein-protein interactions	Atn1
Grn	protein-protein interactions	Grn
Gtf2ird1	protein-protein interactions	Bard1
Gtf2ird1	protein-protein interactions	Brca1
Gtf2ird1	protein-protein interactions	Gtf2ird1
Gtf2ird1	transcription	Fos
Gtf3c5	protein-protein interactions	Cbx1
Gtf3c5	protein-protein interactions	Foxb1
Gtf3c5	protein-protein interactions	Foxp3
H2afx	protein-protein interactions	Bard1
H2afx	protein-protein interactions	Brca1
H2afx	protein-protein interactions	Brca2
H2afx	protein-protein interactions	Calr
H2afx	protein-protein interactions	Cbx5
H2afx	protein-protein interactions	Ezh2
H2afx	protein-protein interactions	Foxp3
Hcst	protein-protein interactions	Ager
Hdac11	expression	Il10
Hdac11	protein-protein interactions	Ddx20
Hdac11	protein-protein interactions	Gmnn
Hdac2	expression	Bcl6
Hdac2	expression	Cd27
Hdac2	expression	Fas
Hdac2	expression	Il6
Hdac2	expression	Pdgfb
Hdac2	expression	Rbbp7
Hdac2	expression	Rorc
Hdac2	expression	Tnfrsf19
Hdac2	protein-DNA interactions	Brca1
Hdac2	protein-DNA interactions	F3
Hdac2	protein-DNA interactions	Nfatc1
Hdac2	protein-DNA interactions	Rorc
Hdac2	protein-DNA interactions	Tnfsf10
Hdac2	protein-protein interactions	Ajuba
Hdac2	protein-protein interactions	Arid5b
Hdac2	protein-protein interactions	Atn1
Hdac2	protein-protein interactions	Bcl6
Hdac2	protein-protein interactions	Bhlhe40
Hdac2	protein-protein interactions	Brca1
Hdac2	protein-protein interactions	Brca2
Hdac2	protein-protein interactions	Cbx1
Hdac2	protein-protein interactions	Cebpa
Hdac2	protein-protein interactions	Ciita
Hdac2	protein-protein interactions	Cir1
Hdac2	protein-protein interactions	Ddx20
Hdac2	protein-protein interactions	Dek
Hdac2	protein-protein interactions	Ezh2
Hdac2	protein-protein interactions	Foxp3
Hdac2	protein-protein interactions	Gata1
Hdac2	protein-protein interactions	Hdac10
Hdac2	protein-protein interactions	Hdac2
Hdac2	protein-protein interactions	Nfatc1
Hdac2	protein-protein interactions	Pold3
Hdac2	protein-protein interactions	Rbbp7
Hdac2	transcription	Tnf
Hdac4	expression	Fgf13
Hdac4	expression	Hdac4
Hdac4	expression	Klf2
Hdac4	expression	Vcam1
Hdac4	protein-DNA interactions	Fos
Hdac4	protein-DNA interactions	Hdac2
Hdac4	protein-DNA interactions	Tnf
Hdac4	protein-DNA interactions	Tnfrsf12a
Hdac4	protein-protein interactions	Bcl6
Hdac4	protein-protein interactions	Cbx1
Hdac4	protein-protein interactions	Cbx3
Hdac4	protein-protein interactions	Cbx5
Hdac4	protein-protein interactions	Ciita
Hdac4	protein-protein interactions	Gata1
Hdac4	protein-protein interactions	Hdac10
Hdac4	protein-protein interactions	Hdac4
Hdac4	protein-protein interactions	Tnf
Hdac4	transcription	Klf2
Hdac4	transcription	Tnf
Hexim2	protein-protein interactions	Aff4
Hexim2	protein-protein interactions	Gata1
Hexim2	protein-protein interactions	Hexim2
Hey1	expression	Prox1
Hey1	protein-DNA interactions	Prox1
Hey1	transcription	Prox1
Hgf	protein-protein interactions	Brca1
Hgf	protein-protein interactions	Hgf
Hic1	expression	Adrb2
Hic1	expression	Inhba
Hic1	expression	Lif
Hic1	protein-DNA interactions	Adrb2
Hic1	protein-protein interactions	Ezh2
Hic1	protein-protein interactions	Hdac4
Hic1	protein-protein interactions	Hic1
Hic1	protein-protein interactions	Phf1
Hic1	transcription	Adrb2
Hif3a	expression	Edn1
Hif3a	expression	Epas1
Hif3a	expression	Plaur
Hif3a	protein-protein interactions	Ahr
Hif3a	protein-protein interactions	Epas1
Hivep2	expression	Fos
Hivep2	expression	Nfatc1
Hivep2	protein-protein interactions	Cited4
Hivep3	expression	Tnf
Hivep3	expression	Tnfsf11
H2-DMb2	protein-protein interactions	H2-Ob
H2-Oa	protein-protein interactions	H2-Ob
H2-Aa	protein-protein interactions	H2-Aa
H2-Eb1	protein-protein interactions	H2-Eb1
Hlf	protein-DNA interactions	Hlf
Hlf	protein-protein interactions	Batf3
Hlf	protein-protein interactions	Dbp
Hlf	protein-protein interactions	Hlf
Hlf	protein-protein interactions	Tef
Hmga1-rs1	activation	Trp73
Hmga1-rs1	expression	Brca1
Hmga1-rs1	expression	Fos
Hmga1-rs1	expression	Gata1
Hmga1-rs1	expression	Id3
Hmga1-rs1	expression	Il6
Hmga1-rs1	expression	Klf2
Hmga1-rs1	expression	Nfix
Hmga1-rs1	expression	Pparg
Hmga1-rs1	protein-DNA interactions	Brca1
Hmga1-rs1	protein-DNA interactions	Cd80
Hmga1-rs1	protein-DNA interactions	Gata1
Hmga1-rs1	protein-DNA interactions	Id3
Hmga1-rs1	protein-DNA interactions	Il2ra
Hmga1-rs1	protein-DNA interactions	Il4
Hmga1-rs1	protein-DNA interactions	Lta
Hmga1-rs1	protein-protein interactions	Jun
Hmga1-rs1	protein-protein interactions	Pparg
Hmga1-rs1	protein-protein interactions	Trp73
Hmga1-rs1	transcription	Brca1
Hmga1-rs1	transcription	Gata1
Hmga1-rs1	transcription	Il2ra
Hmgb2	protein-protein interactions	Hmga1-rs1
Hmgn1	expression	Fos
Hmgn1	expression	Xbp1
Hmgn1	protein-protein interactions	Cep290
Hmgn1	protein-protein interactions	Hmgn1
Hmmr	protein-protein interactions	Bach1
Hmmr	protein-protein interactions	Bard1
Hmmr	protein-protein interactions	Brca1
Hopx	protein-protein interactions	Hdac2
Hoxb4	expression	Ccne1
Hoxb4	expression	E2f1
Hoxb4	protein-DNA interactions	Hoxb4
Hsf4	expression	Lif
Hsf4	protein-protein interactions	Bcl6
Icos	protein-protein interactions	Icos
Id3	expression	Bcl6
Id3	expression	Bmp7
Id3	expression	Ccne1
Id3	expression	Ccr7
Id3	expression	Ccr8
Id3	expression	Cd83
Id3	expression	Csf1
Id3	expression	Cxcr3
Id3	expression	Cxcr5
Id3	expression	E2f2
Id3	expression	Eomes
Id3	expression	Foxp1
Id3	expression	Ifngr1
Id3	expression	Ifngr2
Id3	expression	Ikzf2
Id3	expression	Ikzf4
Id3	expression	Il10
Id3	expression	Il17rb
Id3	expression	Il21
Id3	expression	Il2rb
Id3	expression	Il4
Id3	expression	Il4ra
Id3	expression	Il6
Id3	expression	Il6ra
Id3	expression	Il7r
Id3	expression	Irf6
Id3	expression	Jdp2
Id3	expression	Klf7
Id3	expression	Lmo4
Id3	expression	Lta
Id3	expression	Maf
Id3	expression	Myb
Id3	expression	Nfat5
Id3	expression	Nfatc1
Id3	expression	Rora
Id3	expression	Sell
Id3	expression	Slamf1
Id3	expression	Slamf6
Id3	expression	Socs5
Id3	expression	Sox13
Id3	expression	Stat4
Id3	expression	Tnfsf10
Id3	expression	Tnfsf11
Id3	expression	Tnfsf14
Id3	expression	Tnfsf8
Id3	expression	Tox2
Id3	expression	Zbtb16
Id3	protein-protein interactions	Id3
Id3	protein-protein interactions	Ifi204
Id3	transcription	Foxp3
Id3	transcription	Id3
Id3	transcription	Ifi204
Ifi204	expression	Cxcl10
Ifi204	expression	E2f2
Ifi204	expression	Edn1
Ifi204	expression	Il2rb
Ifi204	expression	Il6
Ifi204	expression	Il7r
Ifi204	expression	Stat2
Ifi204	expression	Tnf
Ifi204	expression	Vcam1
Ifi204	protein-protein interactions	Brca1
Ifi204	protein-protein interactions	Cbx1
Ifi204	protein-protein interactions	Cbx3
Ifi204	protein-protein interactions	Cbx5
Ifi204	protein-protein interactions	Ckap5
Ifi204	protein-protein interactions	Dbp
Ifi204	protein-protein interactions	E2f1
Ifi204	protein-protein interactions	Hmgb2
Ifi204	protein-protein interactions	Id3
Ifi204	protein-protein interactions	Ifi204
Ifi204	protein-protein interactions	Pycard
Ifi204	transcription	Ifi204
Ifnar2	activation	Stat2
Ifnar2	protein-protein interactions	Ifnar2
Ifnar2	protein-protein interactions	Stat2
Ifngr1	activation	Ifngr1
Ifngr1	protein-protein interactions	Ifngr1
Ifngr1	protein-protein interactions	Ifngr2
Ifngr2	protein-protein interactions	Ifngr1
Ifngr2	protein-protein interactions	Ifngr2
Igf1r	activation	Igf1r
Igf1r	phosphorylation	Igf1r
Igf1r	protein-DNA interactions	Igf1r
Igf1r	protein-protein interactions	Ffar2
Igf1r	protein-protein interactions	Gabbr1
Igf1r	protein-protein interactions	Igf1r
Ighm	protein-protein interactions	Arid3a
Ighm	protein-protein interactions	Calr
Ighm	protein-protein interactions	Ighm
Ikzf2	protein-DNA interactions	Foxp3
Ikzf2	protein-protein interactions	Hdac2
Ikzf2	protein-protein interactions	Hdac4
Ikzf2	protein-protein interactions	Ikzf2
Ikzf4	expression	Il2ra
Ikzf4	protein-protein interactions	Foxp3
Ikzf4	protein-protein interactions	Hdac2
Ikzf4	protein-protein interactions	Hdac4
Ikzf4	protein-protein interactions	Ikzf4
Il10	protein-protein interactions	Il10
Il10	translocation	Il10
Il16	protein-protein interactions	Il16
Il17a	protein-protein interactions	Il17a
Il17a	translocation	Il17a
Il17f	protein-protein interactions	Il17a
Il17f	protein-protein interactions	Il17f
Il17ra	protein-protein interactions	Il17a
Il17ra	protein-protein interactions	Il17f
Il17rb	protein-protein interactions	Il17ra
Il18	protein-RNA interactions	Il18r1
Il18	protein-protein interactions	Edn1
Il18	protein-protein interactions	Il18r1
Il18r1	protein-RNA interactions	Il18
Il18r1	protein-protein interactions	Il18
Il27ra	protein-protein interactions	Bhlhe40
Il27ra	protein-protein interactions	Ebi3
Il27ra	protein-protein interactions	Il6st
Il2ra	protein-protein interactions	Il2ra
Il2ra	protein-protein interactions	Il2rb
Il2rb	protein-protein interactions	Il2ra
Il33	activation	Il1rl1
Il33	protein-protein interactions	Il1rl1
Il4	activation	Gata1
Il4	activation	Il4
Il4	activation	Il4ra
Il4	inhibition	Il4ra
Il4	protein-protein interactions	Il4
Il4	protein-protein interactions	Il4ra
Il4	translocation	Il4
Il4ra	activation	Il4
Il4ra	protein-protein interactions	Cd40
Il4ra	protein-protein interactions	Il4
Il4ra	protein-protein interactions	Il4ra
Il5	activation	Bcl6
Il5	protein-protein interactions	Il5
Il5	translocation	Il5
Il6	activation	Il6ra
Il6	activation	Il6st
Il6	activation	Irf1
Il6	activation	Nfkb1
Il6	protein-protein interactions	Il6
Il6	protein-protein interactions	Il6ra
Il6	protein-protein interactions	Il6st
Il6	translocation	Il6
Il6ra	activation	Il6st
Il6ra	protein-protein interactions	Adrb2
Il6ra	protein-protein interactions	Il6
Il6ra	protein-protein interactions	Il6ra
Il6ra	protein-protein interactions	Il6st
Il6st	inhibition	Il6
Il6st	inhibition	Il6ra
Il6st	protein-protein interactions	Il27ra
Il6st	protein-protein interactions	Il6
Il6st	protein-protein interactions	Il6ra
Il6st	protein-protein interactions	Il6st
Il6st	protein-protein interactions	Lif
Ilf2	protein-DNA interactions	Fos
Ilf2	protein-RNA interactions	Il7r
Ilf2	protein-protein interactions	Ezh2
Ilf2	protein-protein interactions	H2afx
Ilf2	transcription	Fos
Inhba	protein-protein interactions	Inhba
Irf1	expression	Cd40
Irf1	expression	Ciita
Irf1	expression	Cxcl10
Irf1	expression	Cxcl3
Irf1	expression	Fasl
Irf1	expression	Il10
Irf1	expression	Il17ra
Irf1	expression	Il18
Irf1	expression	Il6
Irf1	expression	Nfe2
Irf1	expression	Sell
Irf1	expression	Stat2
Irf1	expression	Tnfsf10
Irf1	protein-DNA interactions	Ciita
Irf1	protein-DNA interactions	Cxcl10
Irf1	protein-DNA interactions	Fasl
Irf1	protein-DNA interactions	Foxp3
Irf1	protein-DNA interactions	Il10
Irf1	protein-DNA interactions	Il6
Irf1	protein-DNA interactions	Irf1
Irf1	protein-DNA interactions	Myb
Irf1	protein-DNA interactions	Sell
Irf1	protein-DNA interactions	Tnfsf10
Irf1	protein-DNA interactions	Vcam1
Irf1	protein-protein interactions	Hmga1-rs1
Irf1	protein-protein interactions	Myb
Irf1	transcription	Ciita
Irf1	transcription	Fasl
Irf1	transcription	Sell
Irf1	transcription	Tnf
Irf1	transcription	Vcam1
Irf2bp2	protein-protein interactions	Irf2bp2
Irf2bp2	transcription	Il4
Irf2bp2	transcription	Tnf
Itga4	protein-protein interactions	Ilf2
Itga4	protein-protein interactions	Itga4
Itga4	protein-protein interactions	Itga5
Itga4	protein-protein interactions	Itgb7
Itga4	protein-protein interactions	Plaur
Itga5	protein-protein interactions	Plaur
Itgam	protein-protein interactions	Ager
Itgam	protein-protein interactions	Colec12
Itgam	protein-protein interactions	Plaur
Itgam	translocation	Itgam
Itgax	protein-protein interactions	Ager
Itgb7	protein-protein interactions	Ccr5
Itgb7	protein-protein interactions	Itga4
Itgb7	protein-protein interactions	Itgb7
Jag2	protein-protein interactions	Atn1
Jarid2	protein-protein interactions	Ezh2
Jarid2	protein-protein interactions	Hdac2
Jarid2	protein-protein interactions	Rbbp7
Jdp2	protein-DNA interactions	Jun
Jdp2	protein-protein interactions	Cebpa
Jdp2	protein-protein interactions	Dbp
Jdp2	protein-protein interactions	Hdac10
Jdp2	protein-protein interactions	Hdac2
Jdp2	protein-protein interactions	Hdac4
Jdp2	protein-protein interactions	Jdp2
Jdp2	protein-protein interactions	Jun
Jdp2	transcription	Jun
Jun	activation	Jun
Jun	expression	Btg1
Jun	expression	Cxcl10
Jun	expression	Cxcl15
Jun	expression	Edn1
Jun	expression	Fas
Jun	expression	Fasl
Jun	expression	Fos
Jun	expression	Hmga1-rs1
Jun	expression	Ifi204
Jun	expression	Il10
Jun	expression	Il1rl1
Jun	expression	Il2ra
Jun	expression	Il6
Jun	expression	Il7r
Jun	expression	Itgam
Jun	expression	Jun
Jun	expression	Lif
Jun	expression	Mxi1
Jun	expression	Nfatc1
Jun	expression	Plaur
Jun	expression	Tnf
Jun	expression	Trp73
Jun	expression	Zfp36
Jun	inhibition	Jun
Jun	protein-DNA interactions	Brca1
Jun	protein-DNA interactions	Cxcl10
Jun	protein-DNA interactions	Edn1
Jun	protein-DNA interactions	F3
Jun	protein-DNA interactions	Fas
Jun	protein-DNA interactions	Fasl
Jun	protein-DNA interactions	Fos
Jun	protein-DNA interactions	Il10
Jun	protein-DNA interactions	Il2ra
Jun	protein-DNA interactions	Il6
Jun	protein-DNA interactions	Il7r
Jun	protein-DNA interactions	Jun
Jun	protein-DNA interactions	Plaur
Jun	protein-DNA interactions	Tnf
Jun	protein-RNA interactions	Zfp36
Jun	protein-protein interactions	Bach2
Jun	protein-protein interactions	Batf3
Jun	protein-protein interactions	Bcl6
Jun	protein-protein interactions	Brca1
Jun	protein-protein interactions	Cebpa
Jun	protein-protein interactions	Dbp
Jun	protein-protein interactions	Epas1
Jun	protein-protein interactions	Fos
Jun	protein-protein interactions	Hivep3
Jun	protein-protein interactions	Hlf
Jun	protein-protein interactions	Hmga1-rs1
Jun	protein-protein interactions	Jdp2
Jun	protein-protein interactions	Jun
Jun	protein-protein interactions	Maff
Jun	protein-protein interactions	Nfatc1
Jun	protein-protein interactions	Nrip1
Jun	protein-protein interactions	Tnf
Jun	protein-protein interactions	Trp73
Jun	protein-protein interactions	Vdr
Jun	transcription	Csf1
Jun	transcription	Fas
Jun	transcription	Fos
Jun	transcription	Hmga1-rs1
Jun	transcription	Igf1r
Jun	transcription	Il10
Jun	transcription	Jun
Jun	transcription	Myb
Jun	transcription	Plagl1
Jun	transcription	Tnf
Jun	transcription	Vcam1
Jun	transcription	Vdr
Jun	translocation	Jun
Kdm5b	expression	Brca1
Kdm5b	expression	Ccne1
Kdm5b	expression	E2f1
Kdm5b	expression	Hmmr
Kdm5b	expression	Xbp1
Kdm5b	protein-DNA interactions	Brca1
Kdm5b	protein-protein interactions	Cbx3
Kdm5b	protein-protein interactions	Hdac2
Kdm5b	protein-protein interactions	Hdac4
Klf2	expression	Ccl4
Klf2	expression	Ccr5
Klf2	expression	Ccr8
Klf2	expression	Cd40
Klf2	expression	Cebpa
Klf2	expression	Cxcl3
Klf2	expression	Cxcr3
Klf2	expression	Edn1
Klf2	expression	Epas1
Klf2	expression	F3
Klf2	expression	Id3
Klf2	expression	Il17a
Klf2	expression	Il1rl1
Klf2	expression	Il6
Klf2	expression	Itgb7
Klf2	expression	Pparg
Klf2	expression	S1pr1
Klf2	expression	Sell
Klf2	expression	Tnf
Klf2	expression	Vcam1
Klf2	protein-DNA interactions	Ccr5
Klf2	protein-DNA interactions	Ccr7
Klf2	protein-DNA interactions	Cxcr5
Klf2	protein-DNA interactions	Foxp3
Klf2	protein-DNA interactions	Pparg
Klf2	protein-DNA interactions	S1pr1
Klf2	protein-DNA interactions	Sell
Klf2	transcription	Ccr7
Klf2	transcription	Pparg
Klf2	transcription	S1pr1
Klf2	transcription	Sell
Klf3	expression	Arid5a
Klf3	expression	Cdkn2d
Klf3	expression	Ceacam16
Klf3	expression	E2f2
Klf3	expression	Fcgrt
Klf3	expression	Fos
Klf3	expression	Hbp1
Klf3	expression	Hdac11
Klf3	expression	Il17ra
Klf3	expression	Itgb7
Klf3	expression	Maged1
Klf3	expression	Sell
Klf3	expression	Ssbp2
Klf3	expression	Stat4
Klf3	expression	Zeb2
Klf3	expression	Zfp367
Klf3	transcription	Il4
Klrb1a	protein-protein interactions	Clec2d
Klrb1a	protein-protein interactions	Klrb1a
Klrc3	protein-protein interactions	Klrd1
Klrc3	protein-protein interactions	Klrc2
Klrd1	protein-protein interactions	Hcst
Klrd1	protein-protein interactions	Klrc3
Kmt2c	protein-protein interactions	Jun
Kmt2d	expression	E2f1
Kmt2d	expression	Ebi3
Kmt2d	expression	Gprc5c
Kmt2d	expression	Ikzf2
Kmt2d	expression	Irf1
Kmt2d	expression	Jag2
Kmt2d	expression	Pparg
Kmt2d	expression	Smo
Kmt2d	protein-protein interactions	E2f2
Kmt2d	protein-protein interactions	Kmt2c
Kmt2d	protein-protein interactions	Kmt2d
Klra7	protein-protein interactions	Klra7
Klrc2	protein-protein interactions	Klrd1
Lair1	protein-protein interactions	Lair1
Lef1	expression	Fas
Lef1	expression	Fgf16
Lef1	expression	Il4
Lef1	expression	Lef1
Lef1	expression	Ptch1
Lef1	protein-protein interactions	E2f1
Lef1	protein-protein interactions	Fasl
Lef1	protein-protein interactions	Hmgb2
Lef1	protein-protein interactions	Igf1r
Lef1	transcription	Lef1
Lif	activation	Il6st
Lif	protein-protein interactions	Csf1
Lif	protein-protein interactions	Il6st
Lif	protein-protein interactions	Lif
Litaf	expression	Il10
Litaf	expression	Tnf
Litaf	protein-DNA interactions	Tnf
Litaf	protein-protein interactions	Litaf
Lmo4	protein-protein interactions	Brca1
Lmo4	protein-protein interactions	Hdac2
Lmo4	protein-protein interactions	Il6st
Lmo4	protein-protein interactions	Lmo4
Lpar6	protein-protein interactions	Lmbr1
Ltb4r1	protein-protein interactions	Ltb4r1
Ltbp4	protein-protein interactions	Atn1
Maf	expression	Cxcr5	Yes
Maf	expression	Il10	Yes
Maf	expression	Il17a	Yes
Maf	expression	Il23r	Yes
Maf	expression	Il4	Yes
Maf	expression	Il5	Yes
Maf	expression	Vcam1	Yes
Maf	inhibition	Nfe2l2	Yes
Maf	protein-DNA interactions	Il10	Yes
Maf	protein-DNA interactions	Il17a	Yes
Maf	protein-DNA interactions	Il17f	Yes
Maf	protein-DNA interactions	Il1r1	Yes
Maf	protein-DNA interactions	Il4	Yes
Maf	protein-DNA interactions	Maf	Yes
Maf	protein-DNA interactions	Mafg	Yes
Maf	protein-DNA interactions	Rorc	Yes
Maf	protein-RNA interactions	Fos	Yes
Maf	protein-protein interactions	Ahr	Yes
Maf	protein-protein interactions	Bach1	Yes
Maf	protein-protein interactions	Cebpa	Yes
Maf	protein-protein interactions	Fos	Yes
Maf	protein-protein interactions	Hdac2	Yes
Maf	protein-protein interactions	Jun	Yes
Maf	protein-protein interactions	Kdm5b	Yes
Maf	protein-protein interactions	Maf	Yes
Maf	protein-protein interactions	Mafg	Yes
Maf	protein-protein interactions	Nfe2l2	Yes
Maf	transcription	Il10	Yes
Maf	transcription	Il21	Yes
Maf	transcription	Il4	Yes
Maf	transcription	Maf	Yes
Maf	transcription	Rorc	Yes
Maff	protein-protein interactions	Bach1
Maff	protein-protein interactions	Bach2
Maff	protein-protein interactions	Batf3
Maff	protein-protein interactions	Calcoco1
Maff	protein-protein interactions	Fos
Maff	protein-protein interactions	Hmmr
Maff	protein-protein interactions	Maff
Maff	protein-protein interactions	Nfe2
Maff	protein-protein interactions	Nfe2l2
Mafg	protein-DNA interactions	Mafg
Mafg	protein-protein interactions	Bach1
Mafg	protein-protein interactions	Bach2
Mafg	protein-protein interactions	Batf3
Mafg	protein-protein interactions	Hmmr
Mafg	protein-protein interactions	Jun
Mafg	protein-protein interactions	Maf
Mafg	protein-protein interactions	Maff
Mafg	protein-protein interactions	Mafg
Mafg	protein-protein interactions	Nfe2
Mafg	protein-protein interactions	Nfe2l2
Mafg	transcription	Mafg
Maged1	activation	Jun
Maged1	expression	Jun
Maged1	phosphorylation	Jun
Maged1	protein-protein interactions	Bhlhe40
Maged1	protein-protein interactions	Brca2
Maged1	protein-protein interactions	Maged1
Med30	protein-protein interactions	Med30
Meis3	protein-protein interactions	Jdp2
Mib2	protein-protein interactions	Jag2
Mib2	protein-protein interactions	Mib2
Mib2	ubiquitination	Jag2
Mxi1	expression	Foxm1
Mxi1	protein-DNA interactions	Foxm1
Myb	activation	Gata1
Myb	activation	Myb
Myb	expression	Brca1
Myb	expression	Ccne1
Myb	expression	Igf1r
Myb	expression	Il4
Myb	expression	Il5
Myb	expression	Myb
Myb	expression	Tnfrsf13c
Myb	protein-DNA interactions	Jun
Myb	protein-DNA interactions	Myb
Myb	protein-protein interactions	Gata1
Myb	protein-protein interactions	Hdac2
Myb	protein-protein interactions	Hlf
Myb	protein-protein interactions	Igf1r
Myb	protein-protein interactions	Irf1
Myb	protein-protein interactions	Lef1
Myb	protein-protein interactions	Maf
Myb	transcription	Ccne1
Mybl2	activation	Ccne1
Mybl2	expression	Cebpa
Mybl2	expression	Fasl
Mybl2	protein-protein interactions	Ccne1
Mybl2	protein-protein interactions	E2f1
Mybl2	protein-protein interactions	E2f2
Mybl2	protein-protein interactions	Foxm1
Mybl2	protein-protein interactions	Hdac2
Mybl2	protein-protein interactions	Ikzf2
Mybl2	protein-protein interactions	Mybl1
Mybl2	protein-protein interactions	Mybl2
Mybl2	transcription	Mybl2
Mycbp	protein-protein interactions	Cd40
Nacc2	protein-protein interactions	Foxp3
Nacc2	protein-protein interactions	Hdac2
Nacc2	protein-protein interactions	Nacc2
Nfat5	expression	Areg
Nfat5	protein-DNA interactions	Il4
Nfat5	protein-DNA interactions	Tnf
Nfat5	protein-protein interactions	Nfat5
Nfatc1	activation	Nfatc1
Nfatc1	expression	Ahr
Nfatc1	expression	Cd40
Nfatc1	expression	Cxcr5
Nfatc1	expression	Fas
Nfatc1	expression	Fasl
Nfatc1	expression	Il10
Nfatc1	expression	Il17a
Nfatc1	expression	Il17f
Nfatc1	expression	Il21
Nfatc1	expression	Il2ra
Nfatc1	expression	Il33
Nfatc1	expression	Il4
Nfatc1	expression	Il5
Nfatc1	expression	Nfatc1
Nfatc1	expression	Pparg
Nfatc1	expression	Rorc
Nfatc1	expression	Sell
Nfatc1	expression	Tbx21
Nfatc1	expression	Tnfsf10
Nfatc1	expression	Tnfsf11
Nfatc1	protein-DNA interactions	Fas
Nfatc1	protein-DNA interactions	Foxp3
Nfatc1	protein-DNA interactions	Il2ra
Nfatc1	protein-DNA interactions	Il4
Nfatc1	protein-DNA interactions	Tnf
Nfatc1	protein-DNA interactions	Utrn
Nfatc1	protein-DNA interactions	Vcam1
Nfatc1	protein-protein interactions	Cebpa
Nfatc1	protein-protein interactions	Fos
Nfatc1	protein-protein interactions	Foxp3
Nfatc1	protein-protein interactions	Gzf1
Nfatc1	protein-protein interactions	Hdac2
Nfatc1	protein-protein interactions	Hdac4
Nfatc1	protein-protein interactions	Hmga1-rs1
Nfatc1	protein-protein interactions	Jun
Nfatc1	protein-protein interactions	Nfatc1
Nfatc1	protein-protein interactions	Nfkb1
Nfatc1	transcription	Edn1
Nfatc1	transcription	Fasl
Nfatc1	transcription	Il4
Nfatc1	transcription	Utrn
Nfatc1	translocation	Nfatc1
Nfe2	expression	Gata1
Nfe2	inhibition	Nfe2
Nfe2	protein-protein interactions	Asb1
Nfe2	protein-protein interactions	Ash1l
Nfe2	protein-protein interactions	Carf
Nfe2	protein-protein interactions	Ciita
Nfe2	protein-protein interactions	Creb3l1
Nfe2	protein-protein interactions	Hmgn1
Nfe2	protein-protein interactions	Hoxb4
Nfe2	protein-protein interactions	Kmt2d
Nfe2	protein-protein interactions	Mafg
Nfe2	protein-protein interactions	Nfe2
Nfe2l2	expression	Ahr
Nfe2l2	expression	Brca1
Nfe2l2	expression	Hc
Nfe2l2	expression	Cxcl10
Nfe2l2	expression	Cxcl3
Nfe2l2	expression	Epas1
Nfe2l2	expression	Fgf13
Nfe2l2	expression	Ifngr2
Nfe2l2	expression	Il10
Nfe2l2	expression	Il6
Nfe2l2	expression	Maff
Nfe2l2	expression	Mafg
Nfe2l2	expression	Nfe2l2
Nfe2l2	expression	Rbbp7
Nfe2l2	expression	Scg2
Nfe2l2	expression	Tnf
Nfe2l2	expression	Xbp1
Nfe2l2	inhibition	Nfe2l2
Nfe2l2	protein-DNA interactions	Il10
Nfe2l2	protein-DNA interactions	Mafg
Nfe2l2	protein-protein interactions	Brca1
Nfe2l2	protein-protein interactions	Fos
Nfe2l2	protein-protein interactions	Hdac2
Nfe2l2	protein-protein interactions	Jun
Nfe2l2	protein-protein interactions	Maf
Nfe2l2	protein-protein interactions	Maff
Nfe2l2	protein-protein interactions	Mafg
Nfe2l2	protein-protein interactions	Nfe2
Nfe2l2	transcription	Mafg
Nfe2l2	transcription	Nfe2l2
Nfe2l2	transcription	Vcam1
Nfe2l2	translocation	Nfe2l2
Nfia	expression	Nfia
Nfia	protein-protein interactions	Nfia
Nfix	expression	Nfix
Nfix	protein-protein interactions	Fos
Nfix	protein-protein interactions	Jun
Nfix	protein-protein interactions	Nfix
Nfix	transcription	Hgf
Nfkb1	activation	Fos
Nfkb1	activation	Nfkb1
Nfkb1	expression	Brca2
Nfkb1	expression	Ccl3
Nfkb1	expression	Ccl4
Nfkb1	expression	Cd40
Nfkb1	expression	Cd80
Nfkb1	expression	Csf1
Nfkb1	expression	Cxcl10
Nfkb1	expression	Cxcr5
Nfkb1	expression	Ebi3
Nfkb1	expression	Fasl
Nfkb1	expression	Fos
Nfkb1	expression	Ighm
Nfkb1	expression	Il10
Nfkb1	expression	Il18
Nfkb1	expression	Il2ra
Nfkb1	expression	Il5
Nfkb1	expression	Il6
Nfkb1	expression	Nfkb1
Nfkb1	expression	Pou2f2
Nfkb1	expression	Tnf
Nfkb1	expression	Tnfsf10
Nfkb1	expression	Vcam1
Nfkb1	inhibition	Nfkb1
Nfkb1	protein-DNA interactions	Brca2
Nfkb1	protein-DNA interactions	Cd40
Nfkb1	protein-DNA interactions	Cd80
Nfkb1	protein-DNA interactions	Ciita
Nfkb1	protein-DNA interactions	Cxcl10
Nfkb1	protein-DNA interactions	Cxcl3
Nfkb1	protein-DNA interactions	E2f1
Nfkb1	protein-DNA interactions	Fas
Nfkb1	protein-DNA interactions	Fasl
Nfkb1	protein-DNA interactions	Fcgrt
Nfkb1	protein-DNA interactions	Foxp3
Nfkb1	protein-DNA interactions	H2-DMb2
Nfkb1	protein-DNA interactions	Ifngr2
Nfkb1	protein-DNA interactions	Ighm
Nfkb1	protein-DNA interactions	Il10
Nfkb1	protein-DNA interactions	Il2ra
Nfkb1	protein-DNA interactions	Il6
Nfkb1	protein-DNA interactions	Irf1
Nfkb1	protein-DNA interactions	Jag1
Nfkb1	protein-DNA interactions	Lta
Nfkb1	protein-DNA interactions	Myb
Nfkb1	protein-DNA interactions	Nfkb1
Nfkb1	protein-DNA interactions	Tnf
Nfkb1	protein-DNA interactions	Tnfsf10
Nfkb1	protein-DNA interactions	Vcam1
Nfkb1	protein-protein interactions	Ahr
Nfkb1	protein-protein interactions	Bard1
Nfkb1	protein-protein interactions	E2f1
Nfkb1	protein-protein interactions	Hdac2
Nfkb1	protein-protein interactions	Hdac4
Nfkb1	protein-protein interactions	Hmga1-rs1
Nfkb1	protein-protein interactions	Hmgb2
Nfkb1	protein-protein interactions	Ifngr1
Nfkb1	protein-protein interactions	Il1r1
Nfkb1	protein-protein interactions	Il33
Nfkb1	protein-protein interactions	Irf1
Nfkb1	protein-protein interactions	Jun
Nfkb1	protein-protein interactions	Mxd3
Nfkb1	protein-protein interactions	Nfix
Nfkb1	protein-protein interactions	Nfkb1
Nfkb1	protein-protein interactions	Taf4b
Nfkb1	transcription	Cxcl10
Nfkb1	transcription	Fcgrt
Nfkb1	transcription	Il10
Nfkb1	transcription	Il6
Nfkb1	transcription	Jag1
Nfkb1	transcription	Tnf
Nfkb1	translocation	Nfkb1
Npas4	protein-protein interactions	Arnt2
Nr1d1	protein-DNA interactions	Nr1d1
Nr1d1	protein-DNA interactions	Nupr1
Nr1d1	protein-DNA interactions	Rorc
Nr1d1	protein-protein interactions	Nr1d1
Nr1d1	transcription	Nr1d1
Nr1d2	expression	Il6
Nr1d2	protein-protein interactions	Bhlhe40
Nr1d2	transcription	Nr1d1
Nrarp	protein-protein interactions	Lef1
Nrip1	expression	Areg
Nrip1	expression	Ccne1
Nrip1	expression	Il6
Nrip1	expression	Tnf
Nrip1	protein-DNA interactions	Il6
Nrip1	protein-protein interactions	Ahr
Nrip1	protein-protein interactions	Brca1
Nrip1	protein-protein interactions	E2f1
Nrip1	protein-protein interactions	Fos
Nrip1	protein-protein interactions	Hdac2
Nrip1	protein-protein interactions	Jun
Nrip1	transcription	Areg
Nrip1	transcription	Ccne1
Nrip1	transcription	Tnf
Nrp1	protein-protein interactions	Ager
Nrp1	protein-protein interactions	Hgf
Nrp1	protein-protein interactions	Nrp1
Nupr1	expression	Adrb2
Nupr1	expression	Areg
Nupr1	expression	Brca1
Nupr1	expression	Btg1
Nupr1	expression	E2f8
Nupr1	expression	Gabbr1
Nupr1	expression	Hivep3
Nupr1	expression	Igf1r
Nupr1	expression	Il6ra
Nupr1	expression	Irf2bp2
Nupr1	expression	Lif
Nupr1	expression	Mafg
Nupr1	expression	Nr1d1
Nupr1	expression	Nr1d2
Nupr1	expression	Sigmar1
Nupr1	expression	Slf1
Nupr1	expression	Xbp1
Nupr1	expression	Zfp36l1
Nupr1	protein-DNA interactions	Nupr1
Pa2g4	protein-protein interactions	E2f1
Pa2g4	protein-protein interactions	Foxb1
Pa2g4	protein-protein interactions	Hdac2
Pa2g4	protein-protein interactions	Hmga1-rs1
Pa2g4	protein-protein interactions	Itga4
Pbx1	protein-protein interactions	Hdac2
Pbx1	protein-protein interactions	Hoxb4
Pbx1	protein-protein interactions	Pbx1
Pdgfb	protein-protein interactions	Nrp1
Pdgfb	protein-protein interactions	Pdgfb
Per2	expression	Ccne1
Per2	protein-protein interactions	Bhlhe40
Per2	protein-protein interactions	Bhlhe41
Per2	protein-protein interactions	Foxp1
Per2	protein-protein interactions	Nr1d1
Per2	protein-protein interactions	Per2
Per2	transcription	Dbp
Per2	transcription	Per2
Phf1	activation	Ezh2
Phf1	expression	Hoxb4
Phf1	protein-protein interactions	Apbb1
Phf1	protein-protein interactions	Ezh2
Phf1	protein-protein interactions	Hic1
Phf1	protein-protein interactions	Jarid2
Plagl1	expression	Pparg
Plagl1	protein-DNA interactions	Pparg
Plaur	protein-protein interactions	Hgf
Plaur	protein-protein interactions	Il6st
Plaur	protein-protein interactions	Itga5
Plaur	protein-protein interactions	Itgam
Plaur	protein-protein interactions	Mrc2
Plaur	protein-protein interactions	Plaur
Plxna2	protein-protein interactions	Nrp1
Plxnb1	protein-protein interactions	Plxnb1
Plxnd1	protein-protein interactions	Nrp1
Plxnd1	protein-protein interactions	Plxnd1
Pmf1	activation	Nfe2l2
Pmf1	protein-protein interactions	Nfe2l2
Pou2af1	expression	Cxcr5
Pou2af1	expression	Id3
Pou2af1	expression	Ighm
Pou2af1	expression	Tnfrsf13c
Pou2af1	protein-protein interactions	Ciita
Pou2af1	transcription	Bcl6
Pou2af1	transcription	Ccr5
Pou2f2	expression	Ccr5
Pou2f2	expression	Cxcr5
Pou2f2	expression	Pou2f2
Pou2f2	expression	Tgfa
Pou2f2	protein-DNA interactions	Cxcr5
Pou2f2	protein-protein interactions	Hmga1-rs1
Pou2f2	protein-protein interactions	Hmgb2
Pou2f2	protein-protein interactions	Jun
Pou2f2	protein-protein interactions	Pou2af1
Pou2f2	protein-protein interactions	Pou2f2
Pou2f2	transcription	Ccr5
Pou2f2	transcription	Tgfa
Pparg	activation	Cebpa
Pparg	activation	Nfe2l2
Pparg	activation	Pparg
Pparg	expression	Adrb2
Pparg	expression	Bcl6
Pparg	expression	Ccr7
Pparg	expression	Cd40
Pparg	expression	Cebpa
Pparg	expression	Il10
Pparg	expression	Il2ra
Pparg	expression	Il4
Pparg	expression	Il6
Pparg	expression	Jun
Pparg	expression	Nfe2l2
Pparg	expression	Pparg
Pparg	expression	Ppargc1b
Pparg	expression	Rorc
Pparg	expression	Smo
Pparg	expression	Tnf
Pparg	expression	Tnfsf10
Pparg	expression	Tsc22d3
Pparg	expression	Vcam1
Pparg	expression	Vdr
Pparg	inhibition	Jun
Pparg	inhibition	Pparg
Pparg	protein-DNA interactions	Brca1
Pparg	protein-DNA interactions	Hgf
Pparg	protein-DNA interactions	Hivep2
Pparg	protein-DNA interactions	Nr1d1
Pparg	protein-DNA interactions	Pparg
Pparg	protein-DNA interactions	Tnfsf10
Pparg	protein-RNA interactions	Ezh2
Pparg	protein-protein interactions	Bcl6
Pparg	protein-protein interactions	Ciita
Pparg	protein-protein interactions	Hdac4
Pparg	protein-protein interactions	Hmga1-rs1
Pparg	protein-protein interactions	Jun
Pparg	protein-protein interactions	Lmo4
Pparg	protein-protein interactions	Maff
Pparg	protein-protein interactions	Nfe2l2
Pparg	protein-protein interactions	Nfkb1
Pparg	protein-protein interactions	Nrip1
Pparg	protein-protein interactions	Pparg
Pparg	protein-protein interactions	Ppargc1b
Pparg	protein-protein interactions	Vdr
Pparg	transcription	Edn1
Pparg	transcription	Il6
Pparg	transcription	Nr1d1
Pparg	transcription	Pparg
Pparg	transcription	Tnfsf10
Pparg	translocation	Pparg
Ppargc1b	protein-protein interactions	Jun
Ppargc1b	protein-protein interactions	Pparg
Prdm5	expression	Dkk3
Prdm5	expression	Il6ra
Prdm5	expression	Myb
Prox1	activation	Ccne1
Prox1	expression	Ccne1
Prox1	expression	Hey1
Prox1	expression	Nrp1
Prox1	protein-DNA interactions	Hey1
Prox1	protein-DNA interactions	Nrp1
Ptch1	activation	Smo
Ptch1	protein-protein interactions	Itga4
Ptch1	protein-protein interactions	Smo
Ptgir	protein-protein interactions	Ptgir
Pycard	activation	Pycard
Pycard	expression	Il18
Pycard	expression	Il6
Pycard	protein-protein interactions	Ifi204
Pycard	protein-protein interactions	Il6st
Pycard	protein-protein interactions	Pycard
Pycard	reaction	Pycard
Rad21	expression	H2-Aa
Rad21	protein-protein interactions	Bard1
Rad21	protein-protein interactions	Brca1
Rad21	protein-protein interactions	Brca2
Rad21	protein-protein interactions	C1qbp
Rad21	protein-protein interactions	Ciita
Rad21	protein-protein interactions	Dek
Rad21	protein-protein interactions	Foxp3
Rad21	protein-protein interactions	Hmga1-rs1
Rad21	protein-protein interactions	Il7r
Rad21	protein-protein interactions	Itgam
Rad21	protein-protein interactions	Rad21
Rai14	protein-protein interactions	Cited4
Rbbp7	protein-protein interactions	Brca1
Rbbp7	protein-protein interactions	Brca2
Rbbp7	protein-protein interactions	C1qbp
Rbbp7	protein-protein interactions	Cbx5
Rbbp7	protein-protein interactions	Ezh2
Rbbp7	protein-protein interactions	Gata1
Rbbp7	protein-protein interactions	Hdac2
Rbbp7	protein-protein interactions	Jarid2
Rbbp7	protein-protein interactions	Kdm5b
Rbbp7	protein-protein interactions	Nacc2
Rbbp7	protein-protein interactions	Phf1
Rbbp7	protein-protein interactions	Pold3
Rbpms	protein-protein interactions	Arid5a
Rbpms	protein-protein interactions	Atn1
Rbpms	protein-protein interactions	Bhlhe40
Rbpms	protein-protein interactions	Ckap5
Rbpms	protein-protein interactions	Fos
Rbpms	protein-protein interactions	Foxp3
Rbpms	protein-protein interactions	Lmo4
Rbpms	protein-protein interactions	Maged1
Rbpms	protein-protein interactions	Nr1d2
Rbpms	protein-protein interactions	Phf1
Rbpms	protein-protein interactions	Rbpms
Rcor2	protein-protein interactions	Hdac11
Rcor2	protein-protein interactions	Hdac2
Rora	activation	Foxp3
Rora	expression	Ccl3
Rora	expression	Ccl4
Rora	expression	Cxcl10
Rora	expression	Il10
Rora	expression	Il17a
Rora	expression	Il17f
Rora	expression	Il18
Rora	expression	Il21
Rora	expression	Il23r
Rora	expression	Il6
Rora	expression	Nr1d1
Rora	expression	Nr1d2
Rora	expression	Rora
Rora	expression	Rorc
Rora	expression	Tnf
Rora	protein-DNA interactions	Nr1d1
Rora	protein-protein interactions	Bhlhe41
Rora	protein-protein interactions	Ezh2
Rora	protein-protein interactions	Foxp3
Rora	protein-protein interactions	Maged1
Rora	protein-protein interactions	Prox1
Rora	transcription	Nr1d1
Rorc	activation	Foxp3
Rorc	expression	Cxcl3
Rorc	expression	Foxp3
Rorc	expression	Il17a
Rorc	expression	Il17f
Rorc	expression	Il21
Rorc	expression	Il23r
Rorc	expression	Il2ra
Rorc	expression	Il6
Rorc	expression	Rora
Rorc	expression	Rorc
Rorc	expression	Tnf
Rorc	expression	Zbtb16
Rorc	protein-DNA interactions	Foxp3
Rorc	protein-DNA interactions	Il17a
Rorc	protein-DNA interactions	Il17f
Rorc	protein-DNA interactions	Il17ra
Rorc	protein-DNA interactions	Il1r1
Rorc	protein-DNA interactions	Il23r
Rorc	protein-DNA interactions	Rorc
Rorc	protein-protein interactions	Bhlhe40
Rorc	protein-protein interactions	Bhlhe41
Rorc	protein-protein interactions	Foxp3
Rorc	protein-protein interactions	Nr1d2
Rorc	protein-protein interactions	Per2
Rreb1	protein-protein interactions	Hdac2
Runx3	expression	Ccr7
Runx3	expression	Il4
Runx3	expression	Itgam
Runx3	expression	Itgax
Runx3	expression	Jag1
Runx3	protein-DNA interactions	Ciita
Runx3	protein-DNA interactions	Il4
Runx3	protein-protein interactions	Ezh2
Runx3	protein-protein interactions	Hdac2
Runx3	protein-protein interactions	Hdac4
Runx3	protein-protein interactions	Lef1
Runx3	transcription	Ccr7
S1pr1	protein-protein interactions	F2rl1
S1pr2	protein-protein interactions	S1pr1
Sall2	protein-protein interactions	Rbbp7
Scai	protein-protein interactions	Cbx1
Scai	protein-protein interactions	Cbx5
Sell	protein-protein interactions	Plaur
Slamf1	protein-protein interactions	Antxr1
Slamf1	protein-protein interactions	Slamf1
Slamf6	protein-protein interactions	Slamf6
Smo	protein-protein interactions	Bcl6
Smo	protein-protein interactions	Ptch1
Smo	translocation	Smo
Snai3	protein-protein interactions	Hdac2
Socs5	protein-protein interactions	Il4ra
Sox13	protein-protein interactions	Sox13
Sp6	expression	Lef1
Sp6	protein-protein interactions	Hdac2
Ss18l1	protein-protein interactions	Hdac2
Ss18l1	protein-protein interactions	Hdac4
Ss18l1	protein-protein interactions	Med30
Ss18l1	protein-protein interactions	Ss18l1
Ssbp2	protein-protein interactions	Lmo4
Ssbp2	protein-protein interactions	Slf1
Ssbp2	protein-protein interactions	Ssbp2
Stat2	expression	Irf1
Stat2	expression	Tnfsf10
Stat2	protein-DNA interactions	Cxcl10
Stat2	protein-DNA interactions	Irf1
Stat2	protein-protein interactions	Ifnar2
Stat2	protein-protein interactions	Stat2
Stat2	transcription	Ciita
Stat4	activation	Stat4
Stat4	expression	Ccr5
Stat4	expression	Cir1
Stat4	expression	Cxcl10
Stat4	expression	Cxcl3
Stat4	expression	Fzd7
Stat4	expression	Il10
Stat4	expression	Il18r1
Stat4	expression	Il2ra
Stat4	expression	Jag2
Stat4	expression	Maged1
Stat4	expression	Rora
Stat4	expression	Tbx21
Stat4	expression	Tgfb3
Stat4	expression	Tnf
Stat4	expression	Tcf7
Stat4	expression	Zkscan14
Stat4	protein-DNA interactions	Il10
Stat4	protein-DNA interactions	Il2ra
Stat4	protein-DNA interactions	Irf1
Stat4	protein-protein interactions	Adrb2
Stat4	protein-protein interactions	Jun
Stat4	protein-protein interactions	Stat4
Stat4	transcription	Irf1
Stat4	translocation	Stat4
Sufu	expression	Ptch1
Sufu	protein-protein interactions	Glis2
Sufu	protein-protein interactions	Glis3
Sufu	protein-protein interactions	Hmga1-rs1
Sufu	protein-protein interactions	Sufu
Suv39h2	protein-protein interactions	Cbx1
Suv39h2	protein-protein interactions	Cbx5
Suv39h2	protein-protein interactions	Klf3
Tada2a	protein-protein interactions	Arnt2
Tada2a	protein-protein interactions	Ilf2
Tada2a	protein-protein interactions	Med30
Tada2a	protein-protein interactions	Tada2a
Taf4b	expression	Inhba
Taf4b	expression	Jun
Taf4b	expression	Taf4b
Taf4b	expression	Tgfb3
Taf4b	expression	Zbtb16
Taf4b	protein-DNA interactions	Fasl
Taf4b	protein-DNA interactions	Inhba
Taf4b	protein-DNA interactions	Irf1
Taf4b	protein-DNA interactions	Jun
Taf4b	protein-protein interactions	Bach1
Taf4b	protein-protein interactions	Pou2af1
Taf4b	protein-protein interactions	Pou2f2
Tbx21	expression	Cxcr3
Tbx21	expression	Eomes
Tbx21	expression	Icos
Tbx21	expression	Il17a
Tbx21	expression	Il1rl1
Tbx21	expression	Il2rb
Tbx21	expression	Il4
Tbx21	expression	Il5
Tbx21	expression	Il6ra
Tbx21	expression	Il6st
Tbx21	expression	Rorc
Tbx21	expression	Stat4
Tbx21	expression	Tbx21
Tbx21	inhibition	Il4
Tbx21	inhibition	Il5
Tbx21	protein-DNA interactions	Rorc
Tbx21	protein-DNA interactions	Runx3
Tbx21	protein-DNA interactions	Tcf7
Tbx21	protein-protein interactions	Bcl6
Tbx21	protein-protein interactions	Runx3
Tbx21	transcription	Icos
Tbx21	transcription	Il23r
Tbx21	transcription	Rorc
Tbx6	protein-protein interactions	Rbpms
Tcea2	protein-protein interactions	Brca1
Tead3	protein-protein interactions	E2f1
Tef	protein-protein interactions	Batf3
Tef	protein-protein interactions	Cebpa
Tef	protein-protein interactions	Dbp
Tef	protein-protein interactions	Hlf
Tef	protein-protein interactions	Tef
Tfb1m	expression	E2f1
Tfcp2l1	protein-DNA interactions	Grhl1
Tfcp2l1	protein-protein interactions	Hdac2
Tfcp2l1	protein-protein interactions	Mybl2
Tfcp2l1	protein-protein interactions	Rbbp7
Tfcp2l1	protein-protein interactions	Tfcp2l1
Tfcp2l1	transcription	Grhl1
Tfdp1	activation	E2f1
Tfdp1	activation	E2f2
Tfdp1	expression	E2f1
Tfdp1	expression	Trp73
Tfdp1	protein-DNA interactions	E2f1
Tfdp1	protein-DNA interactions	E2f2
Tfdp1	protein-DNA interactions	Myb
Tfdp1	protein-DNA interactions	Mybl2
Tfdp1	protein-protein interactions	Cbx1
Tfdp1	protein-protein interactions	Ccne1
Tfdp1	protein-protein interactions	Cebpa
Tfdp1	protein-protein interactions	E2f1
Tfdp1	protein-protein interactions	E2f2
Tfdp1	protein-protein interactions	Mybl1
Tfdp1	protein-protein interactions	Mybl2
Tfdp1	transcription	Ccne1
Tgfb1i1	expression	Fos
Tgfb1i1	protein-protein interactions	Itga4
Tgfb1i1	protein-protein interactions	Lef1
Tgfb1i1	protein-protein interactions	Pparg
Tgfb1i1	protein-protein interactions	Tgfb1i1
Thra	activation	Thra
Thra	expression	Cebpa
Thra	expression	Cxcl10
Thra	expression	Cxcl3
Thra	expression	Fos
Thra	expression	Il4
Thra	expression	Il6
Thra	expression	Irf1
Thra	expression	Jun
Thra	expression	Pparg
Thra	expression	Tnf
Thra	protein-DNA interactions	Thrb
Thra	protein-protein interactions	Arid5a
Thra	protein-protein interactions	Hdac2
Thra	protein-protein interactions	Nrip1
Thra	protein-protein interactions	Rora
Thra	protein-protein interactions	Thra
Thra	protein-protein interactions	Thrb
Thra	transcription	E2f1
Thrb	activation	E2f1
Thrb	activation	Pparg
Thrb	expression	Ccne1
Thrb	expression	Ccr1l1
Thrb	expression	Cxcl10
Thrb	expression	Cxcl3
Thrb	expression	Fos
Thrb	expression	Fzd7
Thrb	expression	Igf1r
Thrb	expression	Ighm
Thrb	expression	Il4
Thrb	expression	Il6
Thrb	expression	Jun
Thrb	expression	Pparg
Thrb	expression	Thrb
Thrb	expression	Tnf
Thrb	expression	Tnfsf11
Thrb	expression	Tcf7
Thrb	protein-DNA interactions	Cebpa
Thrb	protein-DNA interactions	Thrb
Thrb	protein-protein interactions	Hdac2
Thrb	protein-protein interactions	Nrip1
Thrb	protein-protein interactions	Plagl1
Thrb	protein-protein interactions	Ppargc1b
Thrb	protein-protein interactions	Psmc3ip
[truncated: 304 more rows]
