# Supplementary material for: c-Maf controls immune responses by regulating disease-specific gene networks and repressing IL-2 in CD4+ T cells
Source: Springer Nature journal article supplement (doi:10.1038/s41590-018-0083-5), 2018-04-13
Supplement: MOESM7 [file 41590_2018_83_MOESM7_ESM_Supp_T_5.xlsx]

## Sheet: ReadMe
Gene Symbol	ENSEMBL ID	ChIP-seq c-Maf Score	Motif c-Maf Score	-log10 (BETA score)	-log2 (FC RNA-seq)
		0= no ChIP-seq peaks within open chromatin regions assigned to gene	0= no Maf_Crunch motif within open chromatin regions assigned to gene	BETA software assignes a p-value to each gene. We have -log10 transormed this values; thus, the higher the number the more likely is a target of c-Maf. For reference p-values <0.05 will have scores >1.301 in a -log10 scale. Note, BETA does not assign a score to non-differentially expressed genes
		1= most open chromatin regions assigned to gene have a c-Maf ChIP-seq peak	1= most open chromatin regions assigned to gene have a Maf_Crunch motif

## Sheet: Malaria_DOWNreg
Gene Symbol	ENSEMBL ID	ChIP-seq c-Maf Score	Motif c-Maf Score	-log10 (BETA score)	-log2 (FC RNA-seq)
Zfp53	ENSMUSG00000057409	0.976473	0.986619	0	-0.660319
Pou2af1	ENSMUSG00000032053	0.983483	0.924372	2.83923	-3.89925
Gadd45a	ENSMUSG00000036390	0.991219	0.983692	0	-1.13104
Ifi204	ENSMUSG00000073489	0.997798	0.977755	2.19538	-2.28796
Samd11	ENSMUSG00000096351	0.985281	0.998969	1.52187	-2.48301
Fam168a	ENSMUSG00000029461	0.886586	0.978452	0	-0.821419
Clec2d	ENSMUSG00000030157	0.980208	0.899869	1.14472	-0.585006
Zfp951	ENSMUSG00000072774	0.681041	0.979901	0	-0.597495
Tmem42	ENSMUSG00000066233	0.963204	0.906308	0.80799	-1.1302
Selenop	ENSMUSG00000064373	0.949907	0.959747	0	-2.08244
Zfp963	ENSMUSG00000092260	0.985839	0.945474	0.849551	-0.916868
Fbxl22	ENSMUSG00000050503	0.946171	0.989797	0.69551	-0.788715
Slc39a13	ENSMUSG00000002105	0.895855	0.963259	0.925915	-0.693681
Prnp	ENSMUSG00000079037	0.903298	0.97335	1.3244	-0.659637
Cxx1c	ENSMUSG00000051851	0.954924	0.865832	1.32698	-2.10473
Il21	ENSMUSG00000027718	0.99632	0.983888	3.79102	-1.83746
Ago3	ENSMUSG00000028842	0.990801	0.837538	2.03414	-0.849387
Gdi1	ENSMUSG00000015291	0.769409	0.981685	0	-0.591215
Zfp799	ENSMUSG00000095253	0.837761	0.99002	0.973876	-0.718352
Snx2	ENSMUSG00000034484	0.986396	0.870432	3.2644	-1.84229
Kctd6	ENSMUSG00000021752	0.866083	0.923815	0.775726	-0.986141
Gm14718	ENSMUSG00000085808	0.823962	0.977504	0	-4.00052
AW549877	ENSMUSG00000041935	0.867811	0.917459	1.05311	-0.746315
Setd4	ENSMUSG00000022948	0.801726	0.940652	0	-0.918187
Angptl6	ENSMUSG00000038742	0.922281	0.859532	1.43168	-0.646728
Ldhb	ENSMUSG00000030246	0.940958	0.987428	1.8242	-1.06405
Drc1	ENSMUSG00000073102	0.978034	0.94776	0.78357	-0.614845
Zfp418	ENSMUSG00000034538	0.983748	0.975608	0.809668	-1.46954
Tnfrsf23	ENSMUSG00000037613	0.908106	0.890767	1.23322	-1.53973
B630019A10Rik	ENSMUSG00000068463	0.667299	0.989435	0	-1.85857
Narf	ENSMUSG00000000056	0.737379	0.995317	0	-0.788075
Ptov1	ENSMUSG00000038502	0.96496	0.923815	1.57905	-1.13186
Filip1l	ENSMUSG00000043336	0.722995	0.963259	0	-0.867789
Slc25a42	ENSMUSG00000002346	0.870292	0.859532	0.939302	-0.789619
Maf	ENSMUSG00000055435	0.222723	0.214883	3.73565	-9.63542
Lamp1	ENSMUSG00000031447	0.907284	0.870432	0.995249	-0.741048
Ptger2	ENSMUSG00000037759	0.791041	0.850751	0	-1.23041
Gm21970	ENSMUSG00000093701	0.850835	0.917459	0	-0.624167
Dstyk	ENSMUSG00000042046	0.767959	0.906308	0	-1.03452
Bnip3	ENSMUSG00000078566	0.658044	0.923815	0	-1.5773
Dyrk1b	ENSMUSG00000002409	0.757199	0.865832	0	-0.760848
Fez2	ENSMUSG00000056121	0.783876	0.875603	0	-0.640586
Phf1	ENSMUSG00000024193	0.729379	0.917459	0	-0.827736
Neil1	ENSMUSG00000032298	0.767123	0.859532	0	-0.704026
Mib2	ENSMUSG00000029060	0.652496	0.880021	0	-0.87331
Smim13	ENSMUSG00000091264	0.611379	0.923815	0	-0.65344
Fbxo32	ENSMUSG00000022358	0.75482	0.613628	0	-0.998185
Malt1	ENSMUSG00000032688	0.882837	0.458702	1.59227	-1.09367
Acp6	ENSMUSG00000028093	0.600424	0.865832	0	-0.617455
Gm26577	ENSMUSG00000097923	0.668609	0.931787	0	-0.714745
Ifit3	ENSMUSG00000074896	0.677445	0.884788	0	-0.679647
N4bp2l1	ENSMUSG00000041132	0.681704	0.699767	0.999132	-0.59809
Ckap4	ENSMUSG00000046841	0.682575	0.837538	0	-1.37011
Pold4	ENSMUSG00000024854	0.603434	0.996515	0	-0.830186
Gbp8	ENSMUSG00000034438	0.812659	0.485783	0	-0.82822
Nfe2l2	ENSMUSG00000015839	0.855407	0.453154	0	-0.612609
Nckap5l	ENSMUSG00000023009	0.611379	0.850751	0	-1.41659
Elmo3	ENSMUSG00000014791	0.789861	0.594012	1.53284	-1.08483
Snx33	ENSMUSG00000032733	0.612773	0.859532	0	-0.652891
Slfn1	ENSMUSG00000078763	0.842593	0.646419	1.14291	-0.691928
Prmt2	ENSMUSG00000020230	0.640398	0.845204	0	-0.737474
Smg1	ENSMUSG00000030655	0.860045	0.188231	0	-0.661154
Ifi213	ENSMUSG00000073491	0.63407	0.877624	0	-1.01571
Tnfrsf26	ENSMUSG00000045362	0.959419	0.443035	2.73142	-1.99739
Fam193a	ENSMUSG00000037210	0.782102	0.586109	0	-0.594228
Mylip	ENSMUSG00000038175	0.815767	0.620299	0	-1.08398
Fam83g	ENSMUSG00000042377	0.816087	0.491693	2.27835	-1.56717
Slc39a8	ENSMUSG00000053897	0.622102	0.665031	1.42678	-0.647317
Ifit1	ENSMUSG00000034459	0.521367	0.596549	1.48972	-0.820985
Gzf1	ENSMUSG00000027439	0.777005	0.453154	0	-0.703756
Prrg4	ENSMUSG00000027171	0.802958	0.41672	0	-1.32023
Metrnl	ENSMUSG00000039208	0.659424	0.454694	1.58203	-0.756705
Cipc	ENSMUSG00000034157	0.791487	0.279179	0.925915	-0.684668
Pnpla7	ENSMUSG00000036833	0.660125	0.589859	0	-0.969097
Nt5dc3	ENSMUSG00000054027	0.879756	0.494606	0	-0.610448
Peak1	ENSMUSG00000074305	0.633531	0.437079	1.16711	-0.778461
Zfp36	ENSMUSG00000044786	0.913021	0.398216	2.51798	-1.09816
Cass4	ENSMUSG00000074570	0.574563	0.382628	4.15342	-0.886174
Prdm15	ENSMUSG00000014039	0.415521	0.607374	0	-0.769404
Gm9978	ENSMUSG00000055704	0.591489	0.72188	0	-1.04714
Pla2g6	ENSMUSG00000042632	0.678114	0.484125	1.2855	-0.683131
Tmem140	ENSMUSG00000057137	0.660831	0.659168	1.19873	-0.722555
B430306N03Rik	ENSMUSG00000043740	0.723148	0.460151	0	-1.28479
Stard10	ENSMUSG00000030688	0.710107	0.316812	0	-0.939398
Ankrd24	ENSMUSG00000054708	0.610557	0.487581	1.04624	-0.651763
Wdfy1	ENSMUSG00000073643	0.70666	0.467589	0	-0.955772
Cd84	ENSMUSG00000038147	0.793236	0.249366	0	-0.673176
Fas	ENSMUSG00000024778	0.595415	0.294929	1.84619	-1.25438
Crebrf	ENSMUSG00000048249	0.886544	0.288611	0.89791	-0.997073
Sh2d1a	ENSMUSG00000005696	0.492906	0.487944	0	-1.29392
Ypel2	ENSMUSG00000018427	0.523277	0.448185	0	-1.11818
Ahr	ENSMUSG00000019256	0.740125	0.418769	1.44141	-1.14591
Spef2	ENSMUSG00000072663	0.88345	0.306438	0	-0.64697
Arsg	ENSMUSG00000020604	0.640138	0.312728	2.02114	-1.0046
Sesn1	ENSMUSG00000038332	0.550646	0.604298	1.5921	-1.11983
Plcb2	ENSMUSG00000040061	0.532824	0.607653	0.938171	-1.03217
Abhd14b	ENSMUSG00000042073	0.620411	0.418769	0	-1.04986
AI504432	ENSMUSG00000056145	0.557532	0.286511	1.74065	-0.73198
Chd9	ENSMUSG00000056608	0.636932	0.404294	0	-0.891333
Abi3	ENSMUSG00000018381	0.673403	0.467671	2.08381	-0.611503
Map4k3	ENSMUSG00000024242	0.552979	0.198121	0	-1.04059
Zfp395	ENSMUSG00000034522	0.625373	0.404048	0	-0.712657
Il7r	ENSMUSG00000003882	0.916469	0.230076	2.98632	-1.20875
Malat1	ENSMUSG00000092341	0.698394	0.450562	3.31985	-1.46329
Zfp365	ENSMUSG00000037855	0.559344	0.624035	0	-0.777152
Parp8	ENSMUSG00000021725	0.577236	0.366984	0	-1.54707
Prkab2	ENSMUSG00000038205	0.372104	0.445837	0	-0.754054
Cnksr3	ENSMUSG00000015202	0.57364	0.508182	1.6347	-1.2034
Rnf157	ENSMUSG00000052949	0.68197	0.48219	0	-1.11112
Fam43a	ENSMUSG00000046546	0.566796	0.590751	0	-3.41457
Podnl1	ENSMUSG00000012889	0.499805	0.499387	2.298	-1.41185
Rnf19a	ENSMUSG00000022280	0.629493	0.384373	0	-0.819021
Dcdc2b	ENSMUSG00000078552	0.52291	0.605302	0	-1.77779
Cxcr5	ENSMUSG00000047880	0.718855	0.355619	2.01922	-2.7397
S1pr2	ENSMUSG00000043895	0.599295	0.442394	0	-0.728441
Pitpnc1	ENSMUSG00000040430	0.848947	0.158914	2.22621	-0.709365
Tmc3	ENSMUSG00000038540	0.637248	0.33246	0	-2.42573
Syt11	ENSMUSG00000068923	0.470925	0.468026	1.1901	-0.811737
Plekho1	ENSMUSG00000015745	0.804588	0.323168	0	-2.26384
Palm3	ENSMUSG00000047986	0.238968	0.727664	0	-1.46285
Dapp1	ENSMUSG00000028159	0.629534	0.244296	0	-0.594639
2310001H17Rik	ENSMUSG00000097354	0.512348	0.33929	2.60942	-1.1951
A930006K02Rik	ENSMUSG00000084866	0.546548	0.286511	0	-0.699641
Mafg	ENSMUSG00000051510	0.721936	0.322253	2.71806	-1.14511
Dpp4	ENSMUSG00000035000	0.837946	0.231389	0	-2.0013
Rnf167	ENSMUSG00000040746	0.615435	0.475218	1.41965	-0.901783
Serpinf1	ENSMUSG00000000753	0.74941	0.199381	0	-1.09421
Wdfy2	ENSMUSG00000014547	0.578727	0.227297	0	-2.00554
Tgm2	ENSMUSG00000037820	0.513264	0.290144	0	-1.06625
Fam20a	ENSMUSG00000020614	0.47648	0.30673	0	-0.855796
Bckdha	ENSMUSG00000060376	0.65419	0.212688	0	-0.609341
Adck5	ENSMUSG00000022550	0.206571	0.655869	0	-1.02185
Map3k5	ENSMUSG00000071369	0.653333	0.278691	2.1112	-0.639427
Rsad2	ENSMUSG00000020641	0.447927	0.491358	1.63676	-1.12098
Rabgap1l	ENSMUSG00000026721	0.529837	0.223587	2.12645	-1.17214
Btla	ENSMUSG00000052013	0.701436	0.167508	0	-1.0335
Cdk6	ENSMUSG00000040274	0.71073	0.251786	0	-1.11311
Tnfrsf22	ENSMUSG00000010751	0.263132	0.279179	0	-0.718429
Atp6v0a1	ENSMUSG00000019302	0.437683	0.479381	1.90274	-1.55511
Slc26a11	ENSMUSG00000039908	0.471761	0.435216	1.75449	-3.10089
Iffo2	ENSMUSG00000041025	0.478294	0.382277	0	-1.30375
Rgs10	ENSMUSG00000030844	0.61147	0.395065	0	-1.91662
Lpp	ENSMUSG00000033306	0.639446	0.330921	2.56751	-1.98771
Ulk1	ENSMUSG00000029512	0.546623	0.3259	2.56241	-0.880732
Dnah11	ENSMUSG00000018581	0.247641	0.459527	0	-3.66624
Aff1	ENSMUSG00000029313	0.690398	0.211829	1.76751	-0.592836
Metap1d	ENSMUSG00000041921	0.415187	0.440011	0	-0.806712
Rnase4	ENSMUSG00000021876	0.308003	0.562763	2.67551	-5.68927
Rab11fip3	ENSMUSG00000037098	0.219051	0.684401	0	-0.777264
Idh1	ENSMUSG00000025950	0.407479	0.458729	0.800519	-0.625091
Coro2b	ENSMUSG00000041729	0.55002	0.215148	0	-8.31019
Acss1	ENSMUSG00000027452	0.393639	0.458729	0	-0.973636
A230050P20Rik	ENSMUSG00000038884	0.453642	0.471998	1.7997	-0.776365
Taz	ENSMUSG00000009995	0.346653	0.458729	0	-0.712667
Tef	ENSMUSG00000022389	0.20935	0.733853	1.4086	-0.654068
Gm10863	ENSMUSG00000075555	0.412497	0.234013	0	-0.634362
B4galnt4	ENSMUSG00000055629	0.397658	0.55881	2.60818	-3.88551
Dusp1	ENSMUSG00000024190	0.626023	0.329719	1.82652	-0.889401
Npas4	ENSMUSG00000045903	0.489672	0.486675	1.46042	-1.36083
Slc16a5	ENSMUSG00000045775	0.366621	0.379087	1.96257	-2.65459
Jmy	ENSMUSG00000021690	0.446311	0.470577	1.35174	-1.19787
Bach2	ENSMUSG00000040270	0.712557	0.228662	0	-1.47299
Itpkb	ENSMUSG00000038855	0.584243	0.218061	0	-0.629492
Myb	ENSMUSG00000019982	0.593308	0.229365	2.27844	-0.622364
Ptpn13	ENSMUSG00000034573	0.333658	0.26609	0	-0.614176
Gad2	ENSMUSG00000026787	0.488557	0.488877	0.6751	-0.639797
Pfkfb3	ENSMUSG00000026773	0.471463	0.28006	1.1197	-0.610394
Zkscan1	ENSMUSG00000029729	0.324924	0.458729	0	-0.632058
Thada	ENSMUSG00000024251	0.469905	0.309027	0	-0.611639
Ddr1	ENSMUSG00000003534	0.619723	0.279179	1.93817	-1.788
Coq8a	ENSMUSG00000026489	0.328176	0.317035	0	-1.00355
Zfp523	ENSMUSG00000024220	0.608104	0.23793	0	-0.736007
Sqor	ENSMUSG00000005803	0.491693	0.475859	0	-2.53603
Dzip1	ENSMUSG00000042156	0.189323	0.561782	0	-1.1964
Arc	ENSMUSG00000022602	0.61399	0.321086	1.49798	-1.04586
Aff3	ENSMUSG00000037138	0.652018	0.22595	0	-1.81885
Kcna3	ENSMUSG00000047959	0.335935	0.461907	1.12581	-0.711658
Por	ENSMUSG00000005514	0.562376	0.240815	0	-0.767098
Gucy1a3	ENSMUSG00000033910	0.240524	0.581282	0	-1.82211
Dnase1l3	ENSMUSG00000025279	0.54718	0.160543	2.74958	-3.10434
Zscan18	ENSMUSG00000070822	0.371561	0.49678	0	-1.39611
Rtp4	ENSMUSG00000033355	0.397221	0.472737	0	-0.941167
Tnfaip8	ENSMUSG00000062210	0.538362	0.186656	2.60363	-1.02053
Zfp871	ENSMUSG00000024298	0.43017	0.49501	1.21595	-0.680269
Pou6f1	ENSMUSG00000009739	0.206571	0.585947	0	-1.17955
Asb2	ENSMUSG00000021200	0.582881	0.169707	0	-1.8456
Egln3	ENSMUSG00000035105	0.515364	0.318903	1.02706	-0.890774
Grhl1	ENSMUSG00000020656	0.695108	0.179974	0	-2.20612
Bach1	ENSMUSG00000025612	0.551665	0.315939	0	-0.588311
Zmym6	ENSMUSG00000042408	0.594728	0.279179	1.52959	-0.942914
Sh3bp5	ENSMUSG00000021892	0.500794	0.252398	1.29688	-1.05185
Gadd45b	ENSMUSG00000015312	0.393945	0.395484	1.80079	-0.697135
Ubtd1	ENSMUSG00000025171	0.303673	0.619537	0	-1.7331
Hivep2	ENSMUSG00000015501	0.62668	0.144371	2.52959	-0.977195
Rreb1	ENSMUSG00000039087	0.560827	0.291041	1.914	-1.2363
Tasp1	ENSMUSG00000039033	0.677623	0.120407	0	-0.991449
Atp9a	ENSMUSG00000027546	0.392719	0.479762	0	-2.19708
Srgn	ENSMUSG00000020077	0.60113	0.165291	2.03278	-0.666175
Fcho2	ENSMUSG00000041685	0.524313	0.160543	0	-0.762933
Slc27a1	ENSMUSG00000031808	0.152845	0.449572	0	-0.71911
Fam214b	ENSMUSG00000036002	0.535911	0.221197	0.919734	-0.788414
Ifi208	ENSMUSG00000066677	0.35202	0.438812	0	-1.19045
Wdsub1	ENSMUSG00000026988	0.423201	0.422602	0.81673	-0.614178
Cd83	ENSMUSG00000015396	0.457628	0.442394	0	-3.41043
Stx16	ENSMUSG00000027522	0.528364	0.29334	0	-0.595612
1600020E01Rik	ENSMUSG00000097048	0.442055	0.150303	1.28769	-0.609531
Usp28	ENSMUSG00000032267	0.232645	0.290144	0	-0.656605
Atn1	ENSMUSG00000004263	0.506628	0.238376	0	-0.819854
Mgat5	ENSMUSG00000036155	0.391517	0.331943	0	-0.87682
Arhgap25	ENSMUSG00000030047	0.426152	0.326578	0	-0.606871
Klhl6	ENSMUSG00000043008	0.679731	0.145072	0	-0.719134
Tigit	ENSMUSG00000071552	0.296026	0.313026	0	-0.938409
Zfp619	ENSMUSG00000068959	0.355072	0.461907	0	-0.932876
Lif	ENSMUSG00000034394	0.687481	0.151051	3.07073	-2.64568
Il4ra	ENSMUSG00000030748	0.533456	0.307938	0	-0.63722
Macf1	ENSMUSG00000028649	0.47436	0.169555	0	-0.760494
Tha1	ENSMUSG00000017713	0.389666	0.49101	0	-0.769919
Inpp4b	ENSMUSG00000037940	0.552591	0.159571	0	-1.28678
Tcf7	ENSMUSG00000000782	0.542007	0.282218	2.15958	-2.16639
Cuedc1	ENSMUSG00000018378	0.382081	0.275538	0	-0.770478
Irf2bp2	ENSMUSG00000051495	0.576093	0.181262	2.42136	-1.1658
Rnf103	ENSMUSG00000052656	0.423842	0.440011	0.83535	-0.595942
Zfp217	ENSMUSG00000052056	0.535964	0.120407	0	-0.703677
Gramd1a	ENSMUSG00000001248	0.461055	0.248038	0	-0.610471
Slamf6	ENSMUSG00000015314	0.504039	0.19147	0	-1.0553
Dnmbp	ENSMUSG00000025195	0.495347	0.169041	0	-0.837352
Slc12a7	ENSMUSG00000017756	0.224756	0.581282	0	-0.680995
Tox	ENSMUSG00000041272	0.512999	0.319829	0	-1.02244
Tmem64	ENSMUSG00000043252	0.423364	0.30897	0	-1.35892
Qser1	ENSMUSG00000074994	0.567223	0.216458	0	-1.30506
Pdcd4	ENSMUSG00000024975	0.275859	0.332095	0	-1.26114
Plekha1	ENSMUSG00000040268	0.304268	0.425376	0	-1.00543
Armc9	ENSMUSG00000062590	0.433981	0.373523	1.11822	-1.09364
Lnx2	ENSMUSG00000016520	0.359474	0.275725	0	-0.934268
Plcl1	ENSMUSG00000038349	0.492563	0.169657	0	-1.60694
Bcl2	ENSMUSG00000057329	0.585429	0.159244	2.09577	-1.25979
Slc43a2	ENSMUSG00000038178	0.332407	0.518687	1.17037	-0.603352
Sh2b3	ENSMUSG00000042594	0.568747	0.283584	1.36764	-1.62425
Elovl6	ENSMUSG00000041220	0.43186	0.168743	0	-0.811846
Il16	ENSMUSG00000001741	0.33603	0.360137	0	-0.908325
Arnt2	ENSMUSG00000015709	0.393182	0.392674	0	-6.72811
Myo1d	ENSMUSG00000035441	0.431704	0.169989	0	-0.65361
Pkd1	ENSMUSG00000032855	0.501194	0.279179	0	-0.916141
Nfia	ENSMUSG00000028565	0.425115	0.195758	0	-1.41213
Zswim6	ENSMUSG00000032846	0.303525	0.320342	0	-1.31825
Arid5b	ENSMUSG00000019947	0.521444	0.23892	2.1152	-1.03125
2700097O09Rik	ENSMUSG00000062198	0.309611	0.302103	0	-0.755131
Maml3	ENSMUSG00000061143	0.398267	0.211551	0	-1.45151
Ccdc126	ENSMUSG00000050786	0.302358	0.449934	0	-1.32337
Src	ENSMUSG00000027646	0.34209	0.371382	0	-1.22244
Fhl3	ENSMUSG00000032643	0.513205	0.181262	0	-0.849358
Mcur1	ENSMUSG00000021371	0.521163	0.316812	0	-0.840417
Gm26517	ENSMUSG00000097159	0.310531	0.279179	0	-0.744626
Galnt6	ENSMUSG00000037280	0.330798	0.402352	2.39405	-0.934519
Tox2	ENSMUSG00000074607	0.426317	0.129473	0	-3.0184
Neb	ENSMUSG00000026950	0.453687	0.236609	0	-1.57496
Tiam1	ENSMUSG00000002489	0.414146	0.178322	1.36492	-0.62851
Ica1l	ENSMUSG00000026018	0.333296	0.32524	0	-2.97301
Trim2	ENSMUSG00000027993	0.367107	0.213627	0.995249	-1.16999
Il1r1	ENSMUSG00000026072	0.466183	0.193945	0	-2.57403
Itgb8	ENSMUSG00000025321	0.185287	0.531503	1.0572	-2.87736
Ctse	ENSMUSG00000004552	0.549369	0.224312	0	-0.855409
Il6ra	ENSMUSG00000027947	0.533321	0.255429	0	-1.87942
Phactr2	ENSMUSG00000062866	0.521381	0.188891	0	-1.56449
Tmem156	ENSMUSG00000037913	0.484331	0.199961	0	-0.944059
Ston2	ENSMUSG00000020961	0.369024	0.219157	0	-0.843502
Timp2	ENSMUSG00000017466	0.610108	0.192356	0	-2.29745
Csf1	ENSMUSG00000014599	0.25725	0.281735	0	-1.30611
Hivep3	ENSMUSG00000028634	0.330991	0.24227	0	-1.09883
Sgsh	ENSMUSG00000005043	0.450966	0.248104	1.22937	-1.16484
Antxr2	ENSMUSG00000029338	0.389095	0.258814	2.20356	-1.34934
Nsg2	ENSMUSG00000020297	0.416283	0.297768	0	-2.22279
A630014C17Rik	ENSMUSG00000086395	0.436744	0.277813	0	-1.36297
Tnfsf8	ENSMUSG00000028362	0.469062	0.307749	2.573	-2.62119
Trim8	ENSMUSG00000025034	0.543018	0.184696	0	-1.21651
Wdr19	ENSMUSG00000037890	0.205182	0.465643	0	-0.75127
Arhgap39	ENSMUSG00000033697	0.510426	0.152513	0	-0.689113
Nfix	ENSMUSG00000001911	0.486945	0.150303	0	-0.898742
Foxp1	ENSMUSG00000030067	0.504238	0.173002	2.19983	-0.785765
Kif5c	ENSMUSG00000026764	0.527888	0.0839831	0	-0.734821
Cyth1	ENSMUSG00000017132	0.361998	0.310506	0	-0.640037
Sntb1	ENSMUSG00000060429	0.402925	0.274731	1.12621	-1.37632
Id3	ENSMUSG00000007872	0.324924	0.445837	0	-1.34467
Arid5a	ENSMUSG00000037447	0.427174	0.23793	0	-0.821369
Ssh2	ENSMUSG00000037926	0.635536	0.0799789	2.52593	-1.39833
Smco4	ENSMUSG00000058173	0.446476	0.330601	0	-1.6152
Cfap54	ENSMUSG00000020014	0.406459	0.097335	0	-0.593098
Evl	ENSMUSG00000021262	0.518139	0.0660683	2.85109	-1.56459
Tsc22d3	ENSMUSG00000031431	0.341817	0.174086	2.25688	-1.43858
Tgfbr3	ENSMUSG00000029287	0.454204	0.158112	0	-0.914025
Plcg1	ENSMUSG00000016933	0.358939	0.19084	0	-0.680647
Aplp1	ENSMUSG00000006651	0.41948	0.248989	0	-0.644292
Rab37	ENSMUSG00000020732	0.268438	0.309267	0	-1.11237
Nt5e	ENSMUSG00000032420	0.450459	0.291919	1.86678	-2.84542
Lrig1	ENSMUSG00000030029	0.61103	0.111345	0	-1.67857
Synj2	ENSMUSG00000023805	0.462216	0.0869735	2.34833	-1.0582
Pacsin1	ENSMUSG00000040276	0.266089	0.367731	0	-1.48163
Bcl9	ENSMUSG00000038256	0.442557	0.258945	0	-1.19261
St8sia1	ENSMUSG00000030283	0.33073	0.205386	2.35507	-1.07413
Trp53inp1	ENSMUSG00000028211	0.228417	0.326467	0	-1.58914
Pltp	ENSMUSG00000017754	0.227664	0.290144	0	-0.878777
Slc11a2	ENSMUSG00000023030	0.241198	0.225455	1.93181	-0.931746
P3h1	ENSMUSG00000028641	0.240134	0.318624	0	-0.597325
Tmem131l	ENSMUSG00000033767	0.336005	0.336639	0	-0.856326
Slc9a9	ENSMUSG00000031129	0.420894	0.155674	1.87257	-1.8286
Dnaaf1	ENSMUSG00000031831	0.216114	0.300607	0	-0.599506
Tmem2	ENSMUSG00000024754	0.111946	0.296123	0	-0.656587
Klhl5	ENSMUSG00000054920	0.168692	0.457538	0	-0.675526
St6gal1	ENSMUSG00000022885	0.397393	0.327935	0	-1.97513
Abtb2	ENSMUSG00000032724	0.384432	0.151555	0	-0.814496
Slc43a1	ENSMUSG00000027075	0.308403	0.329988	1.96577	-2.84174
Apc	ENSMUSG00000005871	0.363832	0.221197	0	-0.957889
Ssbp2	ENSMUSG00000003992	0.461915	0.077341	0	-0.958494
Spock2	ENSMUSG00000058297	0.408515	0.279179	0	-1.81977
Itpr2	ENSMUSG00000030287	0.317558	0.14948	0	-1.13811
Samsn1	ENSMUSG00000022876	0.383344	0.129473	0	-0.660469
St8sia6	ENSMUSG00000003418	0.366146	0.211301	0	-1.02037
St3gal2	ENSMUSG00000031749	0.304647	0.19467	0	-0.60774
Patj	ENSMUSG00000061859	0.297048	0.341071	0	-1.40496
Pecam1	ENSMUSG00000020717	0.341059	0.221992	1.73495	-1.07077
Pear1	ENSMUSG00000028073	0.318607	0.187751	0	-1.28596
Izumo1r	ENSMUSG00000031933	0.3897	0.119063	1.30391	-1.02046
Tbc1d4	ENSMUSG00000033083	0.366822	0.255786	0	-3.66082
A630001G21Rik	ENSMUSG00000052760	0.252143	0.100701	0	-0.687001
Maff	ENSMUSG00000042622	0.282887	0.32681	0	-0.592403
Zfp318	ENSMUSG00000015597	0.230963	0.299083	0	-0.74659
Pptc7	ENSMUSG00000038582	0.593165	0.10565	0	-0.734962
Icos	ENSMUSG00000026009	0.300347	0.283584	2.33273	-0.921513
Tespa1	ENSMUSG00000034833	0.481783	0.138584	2.03054	-1.99652
Vamp1	ENSMUSG00000030337	0.367089	0.13637	1.57025	-1.25274
Msi2	ENSMUSG00000069769	0.377874	0.269429	1.63808	-1.02727
Tmem63a	ENSMUSG00000026519	0.152448	0.46328	0	-0.807969
Hdac4	ENSMUSG00000026313	0.394457	0.183963	0	-0.669813
Ampd3	ENSMUSG00000005686	0.505567	0.181262	0	-1.94345
Kbtbd11	ENSMUSG00000055675	0.215991	0.233421	0	-0.679587
Oasl2	ENSMUSG00000029561	0.323967	0.329895	1.00895	-0.901425
Lgmn	ENSMUSG00000021190	0.399304	0.211301	0	-1.70851
Vps13d	ENSMUSG00000020220	0.184319	0.304017	1.8729	-0.590181
Usp6nl	ENSMUSG00000039046	0.476013	0.0657359	1.97592	-1.51037
Zer1	ENSMUSG00000039686	0.156357	0.473664	0	-0.649356
Zfhx2	ENSMUSG00000040721	0.229941	0.330481	0	-0.883576
Vwa5a	ENSMUSG00000023186	0.328306	0.281735	0	-1.93402
Pgpep1l	ENSMUSG00000030553	0.340779	0.23793	0	-1.26232
Ehbp1	ENSMUSG00000042302	0.281447	0.279179	0	-0.802199
Cyp2s1	ENSMUSG00000040703	0.311367	0.310596	1.12062	-0.700029
Inpp5f	ENSMUSG00000042105	0.428663	0.139432	0	-0.841078
Nfatc1	ENSMUSG00000033016	0.223686	0.213076	0	-0.713429
Gpr155	ENSMUSG00000041762	0.25345	0.290144	0	-1.94376
Fbxl12	ENSMUSG00000066892	0.242745	0.307938	0	-0.662665
Zbtb20	ENSMUSG00000022708	0.317821	0.136147	0	-1.61417
Lbp	ENSMUSG00000016024	0.17302	0.444673	0	-1.79084
Baz2b	ENSMUSG00000026987	0.23342	0.0666025	0.965372	-0.697961
Pim2	ENSMUSG00000031155	0.240599	0.297224	0	-0.699531
Ptk2	ENSMUSG00000022607	0.375444	0.272688	1.13888	-1.94133
Sesn3	ENSMUSG00000032009	0.418411	0.151051	0	-1.47888
Phf21a	ENSMUSG00000058318	0.416395	0.163628	0	-0.734873
Ifih1	ENSMUSG00000026896	0.373672	0.116473	0	-1.24409
Specc1	ENSMUSG00000042331	0.30758	0.302925	0	-1.84075
Rnf123	ENSMUSG00000041528	0.148858	0.382065	0	-0.782581
Mob3b	ENSMUSG00000073910	0.500466	0.102135	0	-1.06397
Irs2	ENSMUSG00000038894	0.418727	0.212688	0	-0.941193
Rapgef4	ENSMUSG00000049044	0.327721	0.210806	0	-1.37891
Kat6b	ENSMUSG00000021767	0.519418	0.0823917	0	-0.66478
Ramp1	ENSMUSG00000034353	0.351064	0.260586	1.51046	-1.18058
Irgm2	ENSMUSG00000069874	0.495936	0.0957349	0	-0.929507
Zfp831	ENSMUSG00000050600	0.180449	0.211301	0	-1.46874
Igsf23	ENSMUSG00000040498	0.435849	0.181262	0	-0.787466
Pcmtd1	ENSMUSG00000051285	0.290915	0.286511	0.808828	-0.636629
Rhobtb2	ENSMUSG00000022075	0.232905	0.332906	0	-0.745487
Smox	ENSMUSG00000027333	0.323523	0.212688	0	-2.10455
Kremen1	ENSMUSG00000020393	0.13853	0.295176	0	-0.634459
Mbnl2	ENSMUSG00000022139	0.279098	0.147231	0	-0.885112
Tbc1d30	ENSMUSG00000052302	0.296928	0.188504	0	-1.10794
Ccr7	ENSMUSG00000037944	0.38619	0.212602	2.77032	-0.958647
P2rx7	ENSMUSG00000029468	0.239663	0.136764	0	-1.94419
Serinc5	ENSMUSG00000021703	0.238132	0.240815	0	-1.79041
Scml4	ENSMUSG00000044770	0.356136	0.199361	1.47599	-1.12596
Acer2	ENSMUSG00000038007	0.294327	0.197162	0	-1.22874
Pdzd2	ENSMUSG00000022197	0.258881	0.110338	0	-0.656259
Ldlrad4	ENSMUSG00000024544	0.383914	0.23934	0	-1.73113
Asap1	ENSMUSG00000022377	0.213017	0.114489	0.800794	-0.662692
Matk	ENSMUSG00000004933	0.345615	0.221197	0	-2.5704
Utrn	ENSMUSG00000019820	0.340878	0.130229	0	-1.0844
Matn2	ENSMUSG00000022324	0.244453	0.245547	0	-6.28177
Acta2	ENSMUSG00000035783	0.274106	0.31592	0	-0.778528
H2-Eb1	ENSMUSG00000060586	0.20317	0.316812	0	-0.964748
Fos	ENSMUSG00000021250	0.241219	0.242494	1.37315	-0.791174
P4ha1	ENSMUSG00000019916	0.280963	0.283584	0.891435	-0.660467
Pcbp3	ENSMUSG00000001120	0.40149	0.15796	0	-0.913224
Rapgef6	ENSMUSG00000037533	0.356998	0.188116	2.07634	-0.703834
Tet3	ENSMUSG00000034832	0.372142	0.146922	2.00122	-0.686879
Prickle1	ENSMUSG00000036158	0.388763	0.108447	0	-1.08145
Lats2	ENSMUSG00000021959	0.164246	0.226013	0	-0.859986
Camk2d	ENSMUSG00000053819	0.33592	0.0810612	1.10891	-0.843595
Crim1	ENSMUSG00000024074	0.307237	0.168829	0	-0.866601
Igf1r	ENSMUSG00000005533	0.223056	0.328896	0.980884	-2.1692
Mturn	ENSMUSG00000038065	0.157138	0.219406	0	-1.15544
Chd6	ENSMUSG00000057133	0.101158	0.145072	0	-0.959924
Tspan5	ENSMUSG00000028152	0.349506	0.116092	0	-1.07535
Dip2b	ENSMUSG00000023026	0.386674	0.135339	0	-0.841239
Galnt9	ENSMUSG00000033316	0.265534	0.143255	0	-1.59183
Mast4	ENSMUSG00000034751	0.135197	0.28758	0	-1.14287
Lncpint	ENSMUSG00000044471	0.382751	0.0721021	0	-1.3105
Ube2h	ENSMUSG00000039159	0.0911111	0.273003	0	-0.689392
Rere	ENSMUSG00000039852	0.280356	0.245689	0	-1.33383
Dus2	ENSMUSG00000031901	0.26372	0.255871	1.80743	-1.0227
Pitpnm1	ENSMUSG00000024851	0.206432	0.290144	0	-0.593294
Klf7	ENSMUSG00000025959	0.323948	0.193867	0	-0.647543
Gsn	ENSMUSG00000026879	0.185007	0.238316	0	-0.75704
Dse	ENSMUSG00000039497	0.186073	0.209385	0	-1.67814
Sell	ENSMUSG00000026581	0.30627	0.0804353	0	-1.66194
Rhoh	ENSMUSG00000029204	0.387469	0.166295	2.40738	-0.732732
Jarid2	ENSMUSG00000038518	0.316885	0.194832	0	-0.734992
Fbln1	ENSMUSG00000006369	0.266078	0.149541	0	-0.956399
Dpy19l3	ENSMUSG00000043671	0.16123	0.186357	0	-1.00008
Gm26551	ENSMUSG00000097219	0.20786	0.260399	0	-1.52168
2310015A10Rik	ENSMUSG00000097729	0.18553	0.232083	0	-1.15471
Synpo	ENSMUSG00000043079	0.121842	0.303799	0	-1.81459
Rapgef2	ENSMUSG00000062232	0.307271	0.0989426	0	-0.779711
Ccdc171	ENSMUSG00000052407	0.107363	0.272758	0	-0.755499
Ankrd6	ENSMUSG00000040183	0.420696	0.116864	0	-0.827978
Cd27	ENSMUSG00000030336	0.213663	0.239937	1.28416	-0.916735
Tmcc1	ENSMUSG00000030126	0.196997	0.330011	0	-0.819305
Frmd4a	ENSMUSG00000026657	0.128659	0.348968	0	-1.34063
Ext1	ENSMUSG00000061731	0.486002	0.0445837	0	-1.46683
Lef1	ENSMUSG00000027985	0.329333	0.14203	0	-0.587591
Kmt2d	ENSMUSG00000048154	0.239992	0.214883	1.66938	-0.922405
Elmsan1	ENSMUSG00000042507	0.354085	0.133913	1.56928	-1.16839
Pink1	ENSMUSG00000028756	0.206604	0.233727	0	-0.623188
Trio	ENSMUSG00000022263	0.311276	0.083575	0	-1.4886
Tob2	ENSMUSG00000048546	0.296295	0.150303	1.47289	-0.715045
Espn	ENSMUSG00000028943	0.23513	0.0757673	0	-0.74878
Acvr1b	ENSMUSG00000000532	0.172107	0.236369	0	-1.10218
Prss12	ENSMUSG00000027978	0.147487	0.17015	0	-2.17212
Spsb1	ENSMUSG00000039911	0.289588	0.17015	0	-1.16434
Kdm4b	ENSMUSG00000024201	0.190461	0.183843	1.15311	-0.848994
Zfp710	ENSMUSG00000048897	0.240896	0.148612	0	-0.696921
Tpd52	ENSMUSG00000027506	0.214772	0.156459	0	-0.793745
Ttc28	ENSMUSG00000033209	0.250168	0.168183	0	-1.15381
Nrip1	ENSMUSG00000048490	0.277034	0.0501011	0	-0.688542
Sbf2	ENSMUSG00000038371	0.226974	0.238968	1.48201	-1.47084
Slc45a4	ENSMUSG00000079020	0.170696	0.172984	0.990549	-0.882065
Adamts3	ENSMUSG00000043635	0.126139	0.164246	0	-1.07655
Znrf1	ENSMUSG00000033545	0.308358	0.138789	0	-0.948334
Zfp292	ENSMUSG00000039967	0.161898	0.211301	0	-0.62234
Daam1	ENSMUSG00000034574	0.0922638	0.314096	0	-1.14171
Rnf144a	ENSMUSG00000020642	0.17412	0.196822	0	-1.5514
Tspan13	ENSMUSG00000020577	0.259355	0.145072	0.992252	-0.803766
Sfi1	ENSMUSG00000023764	0.11109	0.314018	0	-0.750364
Retreg1	ENSMUSG00000022270	0.290772	0.115333	0	-0.961471
Acvrl1	ENSMUSG00000000530	0.200569	0.226577	0	-1.49815
Nhsl1	ENSMUSG00000039835	0.1162	0.327045	0	-2.28564
Itga9	ENSMUSG00000039115	0.163273	0.188642	0	-0.722493
Ppargc1b	ENSMUSG00000033871	0.153031	0.0977801	0	-1.0225
Sufu	ENSMUSG00000025231	0.273528	0.119063	0	-0.701218
Sema4b	ENSMUSG00000030539	0.106327	0.135394	0	-0.767372
Eea1	ENSMUSG00000036499	0.225391	0.0908508	1.34563	-0.761799
Cacna1d	ENSMUSG00000015968	0.165082	0.143684	0	-1.77899
Bmp7	ENSMUSG00000008999	0.093381	0.256671	0	-2.46618
Ikzf2	ENSMUSG00000025997	0.201811	0.108893	0	-2.14579
Ifngr2	ENSMUSG00000022965	0.140674	0.181262	0	-1.06712
Mical3	ENSMUSG00000051586	0.233163	0.116041	0	-0.874521
Dirc2	ENSMUSG00000022848	0.266595	0.0962036	1.58889	-1.62476
Pan3	ENSMUSG00000029647	0.165149	0.174086	0	-0.643364
Dock6	ENSMUSG00000032198	0.13705	0.198924	0	-0.749738
Btbd11	ENSMUSG00000020042	0.161781	0.0945279	0	-0.947103
Dnah17	ENSMUSG00000033987	0.229105	0.14667	0	-0.916824
Cpne5	ENSMUSG00000024008	0.241482	0.145072	0	-0.595199
Zbtb16	ENSMUSG00000066687	0.232355	0.140842	0	-2.76841
Cdh23	ENSMUSG00000012819	0.273923	0.0996385	0	-3.48267
Wdfy4	ENSMUSG00000051506	0.0704894	0.292906	0.889074	-1.21074
Mvb12b	ENSMUSG00000038740	0.11379	0.26196	0	-0.706682
Dapk1	ENSMUSG00000021559	0.207821	0.0751517	0	-1.05715
Tnrc6b	ENSMUSG00000047888	0.292579	0.0854327	1.97881	-0.73047
Macrod1	ENSMUSG00000036278	0.208231	0.121669	0	-0.904059
Dusp10	ENSMUSG00000039384	0.140245	0.143697	0	-0.967969
Pitpnm2	ENSMUSG00000029406	0.221641	0.118325	0.753994	-0.769972
Vrk1	ENSMUSG00000021115	0.141349	0.0680606	0	-0.628808
Rps6kc1	ENSMUSG00000089872	0.137112	0.145835	0	-0.90726
Prkcz	ENSMUSG00000029053	0.108757	0.0815681	0	-0.730904
Ntrk3	ENSMUSG00000059146	0.219822	0.0395662	0	-2.59177
Nav2	ENSMUSG00000052512	0.14231	0.157508	0	-3.43943
Ryr3	ENSMUSG00000057378	0.0315075	0.206481	0	-1.48606
Sp9	ENSMUSG00000068859	0.10465	0.116864	1.34872	-0.741433
Ksr2	ENSMUSG00000061578	0.0415319	0.179245	0	-1.18168
Mgmt	ENSMUSG00000054612	0.0267332	0.240534	0	-0.948282
Cyth3	ENSMUSG00000018001	0.15571	0.0945279	0	-0.671806
Hpcal1	ENSMUSG00000071379	0.154008	0.123235	0	-0.876622
Sh3gl3	ENSMUSG00000030638	0.11602	0.116019	0	-1.12754
Ppp1r13b	ENSMUSG00000021285	0.0921793	0.230633	0	-0.760298
Sh3pxd2a	ENSMUSG00000053617	0.231601	0.0760847	0	-1.86696
Thra	ENSMUSG00000058756	0.130627	0.162202	0	-0.844173
L3mbtl3	ENSMUSG00000039089	0.130213	0.121536	0.957425	-0.604349
Ripor3	ENSMUSG00000074577	0.0895172	0.115864	0	-1.45019
Myo10	ENSMUSG00000022272	0.11747	0.1351	0	-1.31779
Ezh1	ENSMUSG00000006920	0.153788	0.143255	0	-0.825582
App	ENSMUSG00000022892	0.124045	0.136187	0	-0.67816
C030034L19Rik	ENSMUSG00000097365	0.930951	0	1.76271	-6.73472
Trim12a	ENSMUSG00000066258	0.91035	0	0	-0.721663
A630033H20Rik	ENSMUSG00000054293	0.920219	0	1.0242	-0.654042
Elk4	ENSMUSG00000026436	0.915805	0	1.76574	-0.689017
Cxcl10	ENSMUSG00000034855	0.950157	0	1.9024	-0.895673
Slc5a3	ENSMUSG00000089774	0.904831	0	1.95507	-1.36196
Gm11714	ENSMUSG00000087113	0.855044	0	0	-0.791527
Isg15	ENSMUSG00000035692	0.748697	0	0	-0.701797
Tnfsf14	ENSMUSG00000005824	0.800909	0	0.81079	-0.938755
Zbtb37	ENSMUSG00000043467	0.953391	0	0.995679	-0.648124
Mapre3	ENSMUSG00000029166	0.883952	0	0.8671	-1.42835
Il10	ENSMUSG00000016529	0.62305	0	3.4707	-2.75094
F2rl2	ENSMUSG00000021675	0.754467	0	0	-1.55509
Mir22hg	ENSMUSG00000085148	0.982131	0	1.69919	-0.916176
Dennd6b	ENSMUSG00000015377	0.869791	0	1.05586	-0.801452
Tnfrsf12a	ENSMUSG00000023905	0.925264	0	0	-0.903197
3110043O21Rik	ENSMUSG00000028300	0.80116	0	1.7122	-0.923154
Ypel3	ENSMUSG00000042675	0.880634	0	0.999566	-1.22665
Rasa1	ENSMUSG00000021549	0.964932	0	0.900665	-0.764184
Grcc10	ENSMUSG00000072772	0.900027	0	0.871924	-0.779124
Spo11	ENSMUSG00000005883	0.827949	0	0	-0.71446
Jun	ENSMUSG00000052684	0.943105	0	1.1293	-0.617549
Txnip	ENSMUSG00000038393	0.895186	0	3.63339	-1.53485
Blcap	ENSMUSG00000067787	0.911493	0	1.16526	-0.648349
H2-DMb2	ENSMUSG00000037548	0.9857	0	1.6187	-1.25196
Nfat5	ENSMUSG00000003847	0.689081	0	2.59193	-0.730651
Pikfyve	ENSMUSG00000025949	0.989797	0	1.50934	-0.676251
Trim30d	ENSMUSG00000057596	0.894405	0	0.963371	-0.715753
Gm9821	ENSMUSG00000095332	0.682993	0	0	-1.527
Gm17552	ENSMUSG00000097233	0.997185	0	0	-0.865033
Slc25a45	ENSMUSG00000024818	0.909765	0	1.29912	-0.599375
Aldh6a1	ENSMUSG00000021238	0.932512	0	0.681519	-0.841902
Krba1	ENSMUSG00000042810	0.665751	0	0	-0.638688
Sat1	ENSMUSG00000025283	0.820266	0	0	-0.675315
Treml2	ENSMUSG00000071068	0.944527	0	2.35527	-1.46121
Gpcpd1	ENSMUSG00000027346	0.754969	0	0	-0.701176
Otud1	ENSMUSG00000043415	0.94475	0	1.31381	-0.823811
Nanos1	ENSMUSG00000072437	0.854487	0	0	-1.65122
Arrdc3	ENSMUSG00000074794	0.749645	0	1.27761	-0.860281
0610010K14Rik	ENSMUSG00000020831	0.801494	0	0	-0.660408
E130102H24Rik	ENSMUSG00000086782	0.835322	0	0.821023	-0.849994
Sostdc1	ENSMUSG00000036169	0.862013	0	0	-3.46856
Ctla4	ENSMUSG00000026011	0.772081	0	3.914	-0.804654
2010016I18Rik	ENSMUSG00000091575	0.792908	0	0.772113	-1.42302
Spry1	ENSMUSG00000037211	0.793243	0	0	-1.52224
Hcst	ENSMUSG00000064109	0.782692	0	0	-0.77903
Mvk	ENSMUSG00000041939	0.997491	0	0	-0.813937
Prrt2	ENSMUSG00000045114	0.737435	0	0	-0.778886
Dsel	ENSMUSG00000038702	0.866111	0	0	-0.619507
Fam109a	ENSMUSG00000044134	0.757199	0	0	-1.52217
Bambi	ENSMUSG00000024232	0.858696	0	1.35223	-0.652114
Fam26f	ENSMUSG00000046031	0.848661	0	1.4209	-1.10255
Errfi1	ENSMUSG00000028967	0.766147	0	0	-0.645958
Tmem106a	ENSMUSG00000034947	0.807724	0	0	-0.935876
Rgs2	ENSMUSG00000026360	0.81093	0	1.07381	-0.651334
Rn7sk	ENSMUSG00000065037	0.760349	0	0	-1.00507
4930426L09Rik	ENSMUSG00000026736	0.790093	0	0	-0.801249
Cd68	ENSMUSG00000018774	0.948652	0	1.01913	-0.648081
Vps13c	ENSMUSG00000035284	0.577008	0	0	-0.835632
Tjp3	ENSMUSG00000034917	0.810192	0	0	-0.886956
Myo9a	ENSMUSG00000039585	0.772614	0	0	-0.592117
Cnn3	ENSMUSG00000053931	0.939648	0	1.40716	-1.54225
Plekhg2	ENSMUSG00000037552	0.859058	0	2.09876	-1.07875
Lmo4	ENSMUSG00000028266	0.733421	0	1.89963	-0.694132
D730003I15Rik	ENSMUSG00000073478	0.774426	0	0	-0.749863
Ankrd46	ENSMUSG00000048307	0.737142	0	0	-0.647857
Nr1d2	ENSMUSG00000021775	0.798065	0	0	-1.19561
Zfp281	ENSMUSG00000041483	0.78212	0	0	-1.05403
Cebpa	ENSMUSG00000034957	0.716137	0	0	-4.69144
Klf2	ENSMUSG00000055148	0.839238	0	0	-0.654181
D330041H03Rik	ENSMUSG00000073437	0.743122	0	0	-0.667352
Bnip3l	ENSMUSG00000022051	0.70022	0	0	-0.63058
Lta	ENSMUSG00000024402	0.928693	0	0	-0.823755
Bloc1s1	ENSMUSG00000090247	0.677529	0	0	-0.7379
Zkscan14	ENSMUSG00000029627	0.600229	0	0	-0.72026
Kcnmb4	ENSMUSG00000054934	0.669618	0	0	-0.926641
2810021J22Rik	ENSMUSG00000020491	0.711036	0	0	-0.708336
Mxd4	ENSMUSG00000037235	0.697934	0	0	-1.16515
Rapgef4os1	ENSMUSG00000085439	0.751707	0	0	-0.988826
Mex3a	ENSMUSG00000074480	0.849887	0	0	-0.810757
Ciart	ENSMUSG00000038550	0.795501	0	0	-1.31345
Zfp623	ENSMUSG00000050846	0.694087	0	0	-0.651889
Zfp975	ENSMUSG00000069727	0.881415	0	0	-0.925787
Trav6n-6	ENSMUSG00000076802	0.758426	0	0	-0.860718
Flcn	ENSMUSG00000032633	0.807989	0	0	-0.598812
Gm11532	ENSMUSG00000087067	0.667522	0	0	-0.787843
Paxbp1	ENSMUSG00000022974	0.771276	0	0	-0.615142
Zbtb18	ENSMUSG00000063659	0.673403	0	0	-0.987113
Fam8a1	ENSMUSG00000069237	0.815544	0	0	-0.587493
Zfp358	ENSMUSG00000047264	0.822318	0	0	-0.987945
Trib3	ENSMUSG00000032715	0.806637	0	0.750313	-0.813384
Ypel4	ENSMUSG00000034059	0.711036	0	0	-1.44429
Tnfrsf13b	ENSMUSG00000010142	0.88515	0	1.26376	-0.715535
Ccdc17	ENSMUSG00000034035	0.63407	0	0	-1.41201
Sccpdh	ENSMUSG00000038936	0.62816	0	0	-4.85917
Ldlr	ENSMUSG00000032193	0.80208	0	0	-1.47935
Tubb2a	ENSMUSG00000058672	0.728236	0	0	-1.17501
Cep97	ENSMUSG00000022604	0.652111	0	0	-0.675645
Abcc10	ENSMUSG00000032842	0.669473	0	0	-0.680666
Cul7	ENSMUSG00000038545	0.688429	0	0	-0.673274
Slc25a36	ENSMUSG00000032449	0.585845	0	0	-0.58619
Klhl24	ENSMUSG00000062901	0.652496	0	0	-1.28167
Zfp512b	ENSMUSG00000000823	0.661863	0	0	-1.00007
Usp32	ENSMUSG00000000804	0.643297	0	0	-0.644833
Rhbdd2	ENSMUSG00000039917	0.677529	0	0	-0.823855
Ccdc28a	ENSMUSG00000059554	0.667522	0	0	-0.757709
Rasal3	ENSMUSG00000052142	0.53964	0	0	-0.598636
4932438A13Rik	ENSMUSG00000037270	0.799487	0	0	-1.02723
Fcrl1	ENSMUSG00000059994	0.754467	0	0	-2.31421
Dnaja4	ENSMUSG00000032285	0.716137	0	0	-0.795591
Zfp119a	ENSMUSG00000057835	0.500116	0	0	-0.602071
Gm11696	ENSMUSG00000056687	0.716137	0	0	-1.0825
Kdm5b	ENSMUSG00000042207	0.716137	0	0	-1.26436
Btg1	ENSMUSG00000036478	0.817391	0	2.43392	-1.00431
Trpm6	ENSMUSG00000024727	0.64811	0	1.36462	-2.58579
Gm12764	ENSMUSG00000086184	0.640398	0	0	-0.677627
Zfp667	ENSMUSG00000054893	0.722103	0	0	-1.24943
Armcx6	ENSMUSG00000050394	0.671675	0	0	-0.766637
Cdkn1b	ENSMUSG00000003031	0.671647	0	0	-0.829222
Nme4	ENSMUSG00000024177	0.685251	0	0	-1.04733
Rdh1	ENSMUSG00000089789	0.333761	0	0	-0.616554
Ccr2	ENSMUSG00000049103	0.431613	0	1.86678	-2.12893
Parp3	ENSMUSG00000023249	0.531533	0	1.26448	-1.01974
Mpp1	ENSMUSG00000031402	0.606445	0	0	-1.12729
Rmdn1	ENSMUSG00000028229	0.638837	0	0	-0.747354
Fbxl20	ENSMUSG00000020883	0.645137	0	0	-1.13197
Carf	ENSMUSG00000026017	0.60979	0	0	-0.588489
Rapgef4os2	ENSMUSG00000085001	0.618181	0	0	-1.60967
Armcx3	ENSMUSG00000049047	0.693307	0	0	-0.648602
Ppp1r15a	ENSMUSG00000040435	0.636941	0	0	-0.617357
Pfkfb4	ENSMUSG00000025648	0.553682	0	0	-1.63923
Ift172	ENSMUSG00000038564	0.690919	0	0	-0.651853
Aqp3	ENSMUSG00000028435	0.682993	0	0	-0.620352
Syp	ENSMUSG00000031144	0.521497	0	0.945004	-1.00482
Neil2	ENSMUSG00000035121	0.50991	0	0.807154	-1.43978
Gm26901	ENSMUSG00000097797	0.45045	0	0	-1.49863
Zfp36l1	ENSMUSG00000021127	0.639158	0	0.785156	-0.657464
Tnfsf11	ENSMUSG00000022015	0.594523	0	1.34075	-1.41103
A630023P12Rik	ENSMUSG00000048215	0.701335	0	0	-2.10444
Adcy6	ENSMUSG00000022994	0.632509	0	0	-1.17852
Vill	ENSMUSG00000038775	0.32728	0	0	-1.17855
Ccnd2	ENSMUSG00000000184	0.555368	0	2.37039	-1.08337
Zswim4	ENSMUSG00000035671	0.487121	0	2.74065	-1.60405
Aff4	ENSMUSG00000049470	0.671996	0	0	-0.630667
Gbp9	ENSMUSG00000029298	0.587127	0	0	-0.931933
Tgtp1	ENSMUSG00000078922	0.6804	0	0	-0.764702
Mx1	ENSMUSG00000000386	0.42562	0	0.981299	-0.696693
Crebl2	ENSMUSG00000032652	0.29964	0	0	-1.41783
Arhgap4	ENSMUSG00000031389	0.511759	0	0	-0.64694
Fndc10	ENSMUSG00000074738	0.642545	0	0	-0.617208
Emb	ENSMUSG00000021728	0.597035	0	0	-0.872359
Mmab	ENSMUSG00000029575	0.269599	0	0	-0.637434
AW011738	ENSMUSG00000078349	0.600424	0	0	-1.07762
Zfp169	ENSMUSG00000050954	0.48786	0	1.09936	-0.874787
Pdk1	ENSMUSG00000006494	0.412288	0	0	-1.00547
Samd9l	ENSMUSG00000047735	0.395144	0	0	-0.714084
Ankrd12	ENSMUSG00000034647	0.520215	0	1.56019	-1.2285
Ccdc125	ENSMUSG00000048924	0.509966	0	0	-1.11182
Frat2	ENSMUSG00000047604	0.652357	0	0	-1.2883
Hemgn	ENSMUSG00000028332	0.390837	0	0	-2.76651
Fchsd2	ENSMUSG00000030691	0.426097	0	1.2353	-0.645429
Cbarp	ENSMUSG00000035640	0.628383	0	0	-1.19717
Zfp369	ENSMUSG00000021514	0.370599	0	0	-0.66407
Tcea2	ENSMUSG00000059540	0.528903	0	0.670602	-0.648849
Plekhm3	ENSMUSG00000051344	0.322647	0	0.911155	-0.683175
Rpgrip1	ENSMUSG00000057132	0.543242	0	0	-1.09697
Aldh4a1	ENSMUSG00000028737	0.5586	0	1.78516	-0.820355
Gpm6b	ENSMUSG00000031342	0.233761	0	0	-2.98581
Dntt	ENSMUSG00000025014	0.535277	0	0	-1.21781
6430562O15Rik	ENSMUSG00000097828	0.550591	0	1.86265	-1.10875
Axin2	ENSMUSG00000000142	0.357394	0	1.30034	-0.623517
Trim34a	ENSMUSG00000056144	0.446157	0	0	-0.763493
Hexa	ENSMUSG00000025232	0.614418	0	0	-0.958047
Mir142hg	ENSMUSG00000084796	0.485365	0	0	-1.14467
Zbtb4	ENSMUSG00000018750	0.607281	0	0	-1.26336
Ttc39c	ENSMUSG00000024424	0.416699	0	1.35773	-0.72383
Slc37a2	ENSMUSG00000032122	0.500999	0	0.813609	-1.54112
Hdac10	ENSMUSG00000062906	0.303641	0	0	-0.60842
Smpdl3a	ENSMUSG00000019872	0.421557	0	0	-1.34502
Snx30	ENSMUSG00000028385	0.387785	0	0.894149	-0.709799
Ddit4	ENSMUSG00000020108	0.522417	0	3.56912	-2.16891
Usp35	ENSMUSG00000035713	0.348228	0	0	-0.970892
Brwd1	ENSMUSG00000022914	0.39763	0	0	-0.672778
Uvssa	ENSMUSG00000037355	0.445906	0	0	-0.822772
Neurl3	ENSMUSG00000047180	0.465945	0	0	-0.609278
Adamts6	ENSMUSG00000046169	0.462342	0	0.69037	-0.638989
Zdhhc1	ENSMUSG00000039199	0.397848	0	0	-0.975769
Scai	ENSMUSG00000035236	0.394837	0	0	-0.87249
Marcks	ENSMUSG00000069662	0.411089	0	0	-1.1431
Qpct	ENSMUSG00000024084	0.442422	0	0	-0.603943
Susd1	ENSMUSG00000038578	0.435995	0	0	-1.80525
Crtc3	ENSMUSG00000030527	0.496086	0	0	-0.6313
Rictor	ENSMUSG00000050310	0.530873	0	0	-0.709334
Zfp1	ENSMUSG00000055835	0.336069	0	1.45235	-0.850664
Sdcbp2	ENSMUSG00000027456	0.427438	0	1.50362	-0.684406
2610301B20Rik	ENSMUSG00000059482	0.290971	0	0.70224	-0.595832
Fam131a	ENSMUSG00000050821	0.458432	0	0	-0.716326
Pkib	ENSMUSG00000019876	0.442854	0	0	-0.597236
Txlnb	ENSMUSG00000039891	0.425613	0	1.19675	-1.95004
Ctsl	ENSMUSG00000021477	0.459008	0	0.936667	-1.4264
H2-Ke6	ENSMUSG00000073422	0.370111	0	0	-0.795896
Amigo2	ENSMUSG00000048218	0.322039	0	0	-1.13385
Clcn2	ENSMUSG00000022843	0.31199	0	0	-1.03656
Zbtb12	ENSMUSG00000049823	0.340869	0	0	-0.671207
Ehd3	ENSMUSG00000024065	0.277781	0	0	-0.660212
Ece1	ENSMUSG00000057530	0.32265	0	0	-0.640238
Plagl1	ENSMUSG00000019817	0.384502	0	0	-1.82255
Dnajb2	ENSMUSG00000026203	0.40504	0	0	-0.974453
Ipcef1	ENSMUSG00000064065	0.326076	0	0.936291	-0.881436
Ccdc102a	ENSMUSG00000063605	0.342625	0	0	-1.30906
Begain	ENSMUSG00000040867	0.269228	0	0	-1.25879
Ttyh2	ENSMUSG00000034714	0.218409	0	0	-1.57074
Kansl1l	ENSMUSG00000026004	0.456402	0	1.10696	-1.26339
Stxbp1	ENSMUSG00000026797	0.393179	0	0	-1.551
Stat2	ENSMUSG00000040033	0.342625	0	0	-0.73495
Unc13a	ENSMUSG00000034799	0.233509	0	0	-0.717155
Slc41a1	ENSMUSG00000013275	0.388858	0	0	-1.22052
Insr	ENSMUSG00000005534	0.510096	0	1.71783	-1.3062
Per2	ENSMUSG00000055866	0.4582	0	0	-0.587113
Kmt2c	ENSMUSG00000038056	0.410894	0	0	-0.773772
Eya2	ENSMUSG00000017897	0.395984	0	0.825068	-0.927322
P2ry14	ENSMUSG00000036381	0.335707	0	0	-1.01023
Hs6st1	ENSMUSG00000045216	0.501724	0	0	-0.721141
Mccc2	ENSMUSG00000021646	0.330011	0	0	-0.645516
3110056K07Rik	ENSMUSG00000085622	0.481848	0	0	-0.633314
Ipmk	ENSMUSG00000060733	0.426886	0	0	-1.08306
Prpf40b	ENSMUSG00000023007	0.346514	0	0	-0.796309
Taf4b	ENSMUSG00000054321	0.464737	0	0.896538	-0.637941
Gbp2	ENSMUSG00000028270	0.282562	0	1.1139	-0.727629
5330438D12Rik	ENSMUSG00000052291	0.323795	0	0	-0.796637
Egln2	ENSMUSG00000058709	0.355518	0	0	-0.616253
Rasgrp4	ENSMUSG00000030589	0.416413	0	0	-0.741987
Abca1	ENSMUSG00000015243	0.392217	0	1.25877	-1.04072
Parp16	ENSMUSG00000032392	0.42959	0	0	-0.611635
Leng9	ENSMUSG00000043432	0.379951	0	0	-0.73692
Sec14l1	ENSMUSG00000020823	0.372146	0	0	-0.752955
Znrf3	ENSMUSG00000041961	0.376832	0	0	-0.933964
Tert	ENSMUSG00000021611	0.361498	0	0	-0.850408
Acvr2a	ENSMUSG00000052155	0.335838	0	0	-1.07209
Vamp5	ENSMUSG00000073002	0.375373	0	0	-1.02789
Rhob	ENSMUSG00000054364	0.403465	0	0	-0.99431
Zfp949	ENSMUSG00000032425	0.255382	0	0	-0.668689
Rsrp1	ENSMUSG00000037266	0.461489	0	1.13188	-0.620769
Tmem191c	ENSMUSG00000055692	0.307055	0	0	-0.846254
F2rl1	ENSMUSG00000021678	0.311411	0	0	-1.53192
Sfxn5	ENSMUSG00000033720	0.286306	0	0.786482	-1.17648
Aldh2	ENSMUSG00000029455	0.374502	0	0	-0.786445
Card6	ENSMUSG00000041849	0.368717	0	0	-1.07176
Nphp3	ENSMUSG00000032558	0.336144	0	0	-1.02248
Arl5c	ENSMUSG00000038352	0.440004	0	0	-1.01404
Ifnar2	ENSMUSG00000022971	0.324325	0	0	-1.09883
Zfp516	ENSMUSG00000058881	0.385564	0	0.848324	-0.954766
Trim13	ENSMUSG00000035235	0.360494	0	0	-0.986111
Capn3	ENSMUSG00000079110	0.247884	0	0	-1.36536
Atp9b	ENSMUSG00000024566	0.345552	0	0	-0.781713
Acad10	ENSMUSG00000029456	0.377484	0	0	-1.34086
Tgfb1i1	ENSMUSG00000030782	0.315688	0	0	-0.834077
Ash1l	ENSMUSG00000028053	0.301452	0	0	-0.957762
Abca3	ENSMUSG00000024130	0.37839	0	0	-1.33408
Il27ra	ENSMUSG00000005465	0.361051	0	0	-0.74185
Pgap1	ENSMUSG00000073678	0.411298	0	0	-0.837794
Pik3ip1	ENSMUSG00000034614	0.343692	0	0	-1.25279
Acsl3	ENSMUSG00000032883	0.285284	0	1.96778	-2.05703
Msmo1	ENSMUSG00000031604	0.32747	0	0	-0.629755
Hspbap1	ENSMUSG00000022849	0.419187	0	0.819014	-0.599702
Shf	ENSMUSG00000033256	0.287871	0	0	-1.28561
Zdhhc14	ENSMUSG00000034265	0.348925	0	0	-1.46346
Mmd	ENSMUSG00000003948	0.135779	0	0	-0.818874
Atp1b1	ENSMUSG00000026576	0.314275	0	0	-1.82876
Fhdc1	ENSMUSG00000041842	0.313417	0	0	-1.37496
Tesc	ENSMUSG00000029359	0.241109	0	0.763967	-0.763936
Sh3bgrl2	ENSMUSG00000032261	0.31323	0	0.926282	-1.17188
Als2cl	ENSMUSG00000044037	0.37232	0	0	-1.35365
Bzw2	ENSMUSG00000020547	0.2709	0	0	-0.676771
Nbeal1	ENSMUSG00000073664	0.183397	0	0	-0.823076
Tecpr1	ENSMUSG00000066621	0.229239	0	0	-0.744609
Zfp120	ENSMUSG00000068134	0.384384	0	0	-0.849719
Asb13	ENSMUSG00000033781	0.205912	0	0	-0.966245
Tbx6	ENSMUSG00000030699	0.322485	0	0	-1.68696
Clk1	ENSMUSG00000026034	0.387244	0	0.945004	-0.739168
Ikbke	ENSMUSG00000042349	0.203126	0	0	-0.685745
Zhx2	ENSMUSG00000071757	0.34059	0	0.787546	-0.846141
Ctdsp2	ENSMUSG00000078429	0.22299	0	0	-0.598492
Gm20033	ENSMUSG00000097640	0.232424	0	0	-1.00629
Eml5	ENSMUSG00000051166	0.13637	0	0	-0.917889
Usp53	ENSMUSG00000039701	0.27444	0	0	-0.64566
Slc25a27	ENSMUSG00000023912	0.192004	0	0	-1.40336
Dbp	ENSMUSG00000059824	0.294465	0	0.880744	-1.45102
Dennd2d	ENSMUSG00000027901	0.285303	0	1.21968	-1.48155
Zscan12	ENSMUSG00000036721	0.359936	0	0	-0.810212
Gm26669	ENSMUSG00000097417	0.32728	0	0	-0.711087
Rnf169	ENSMUSG00000058761	0.250058	0	0	-0.646393
Mthfr	ENSMUSG00000029009	0.223009	0	0	-0.597087
Ttyh3	ENSMUSG00000036565	0.243372	0	0	-0.819469
Il6st	ENSMUSG00000021756	0.252804	0	0	-1.1953
Lipa	ENSMUSG00000024781	0.314465	0	0	-0.755638
Klhl42	ENSMUSG00000040102	0.158548	0	0	-0.706163
Ckb	ENSMUSG00000001270	0.212314	0	0	-0.664046
Gpr183	ENSMUSG00000051212	0.254946	0	0	-0.690577
Fgd4	ENSMUSG00000022788	0.330931	0	0	-0.636593
Wdr41	ENSMUSG00000042015	0.225843	0	0	-0.590378
Igfbp4	ENSMUSG00000017493	0.220008	0	0	-1.47104
Map3k14	ENSMUSG00000020941	0.247898	0	0	-0.754011
Igsf3	ENSMUSG00000042035	0.206246	0	0	-0.642809
Itga5	ENSMUSG00000000555	0.340869	0	0	-0.79372
P4ha2	ENSMUSG00000018906	0.195251	0	0	-1.22586
Pros1	ENSMUSG00000022912	0.249621	0	0	-1.24766
Fbxo17	ENSMUSG00000030598	0.186073	0	0	-0.779698
Grm6	ENSMUSG00000000617	0.301717	0	0	-1.41427
Ubn2	ENSMUSG00000038538	0.232645	0	0	-0.616806
Ccdc30	ENSMUSG00000028637	0.243126	0	0	-0.740806
Acpp	ENSMUSG00000032561	0.276132	0	0	-1.1898
Cpne7	ENSMUSG00000034796	0.312171	0	0	-3.09302
Kif13a	ENSMUSG00000021375	0.226029	0	0	-1.55885
Dlg3	ENSMUSG00000000881	0.230605	0	0	-0.612959
Vsir	ENSMUSG00000020101	0.125029	0	0	-0.92964
Ttc3	ENSMUSG00000040785	0.112922	0	0	-0.636205
Kdm7a	ENSMUSG00000042599	0.238545	0	0	-0.609778
Gm15441	ENSMUSG00000074398	0.294967	0	3.45519	-1.48958
Zfr2	ENSMUSG00000034949	0.276132	0	0	-2.25115
Akap8l	ENSMUSG00000002625	0.241993	0	0	-0.847251
Pfkfb2	ENSMUSG00000026409	0.265557	0	0	-0.720926
BC043934	ENSMUSG00000056418	0.264935	0	0	-0.712474
Zfyve28	ENSMUSG00000037224	0.109414	0	0	-1.28063
Kif1b	ENSMUSG00000063077	0.233639	0	0	-0.717247
Grn	ENSMUSG00000034708	0.26848	0	0	-1.65016
Fam214a	ENSMUSG00000034858	0.124467	0	0	-0.942269
Slc37a3	ENSMUSG00000029924	0.230446	0	0.96457	-0.64864
Rasgrf2	ENSMUSG00000021708	0.105201	0	0	-0.618084
Ss18l1	ENSMUSG00000039086	0.201293	0	0	-0.753517
Cd2ap	ENSMUSG00000061665	0.196819	0	0	-0.953137
Cbx7	ENSMUSG00000053411	0.137271	0	0	-0.743549
Nisch	ENSMUSG00000021910	0.123236	0	0	-0.671382
Calcrl	ENSMUSG00000059588	0.227713	0	0.721246	-0.630393
Ralgps1	ENSMUSG00000038831	0.067931	0	0	-1.07441
Hspa12a	ENSMUSG00000025092	0.116243	0	0	-1.43775
Tsc22d1	ENSMUSG00000022010	0.102305	0	0	-0.938314
Egr3	ENSMUSG00000033730	0.19114	0	0	-0.79754
Enc1	ENSMUSG00000041773	0.168578	0	1.42713	-1.10519
Arrb1	ENSMUSG00000018909	0.148124	0	0.996109	-1.0874
Bcl6	ENSMUSG00000022508	0.214925	0	1.60345	-2.09202
Wdr66	ENSMUSG00000029442	0.169392	0	0	-1.65501
Stx1a	ENSMUSG00000007207	0.202399	0	0	-0.731549
Cpq	ENSMUSG00000039007	0.155964	0	0	-1.63471
Vps13a	ENSMUSG00000046230	0.203263	0	0	-0.623078
Tle1	ENSMUSG00000008305	0.132244	0	0	-0.697726
Zscan2	ENSMUSG00000038797	0.168448	0	0	-0.892306
Sptb	ENSMUSG00000021061	0.166128	0	0	-2.47046
Plekha7	ENSMUSG00000045659	0.0580786	0	0	-1.03144
Afap1	ENSMUSG00000029094	0.150066	0	0	-1.14943
Gch1	ENSMUSG00000037580	0.154908	0	0	-0.783873
Abhd4	ENSMUSG00000040997	0	0.995874	0	-0.603738
Guca1b	ENSMUSG00000023979	0	0.92833	0	-0.872201
Per3	ENSMUSG00000028957	0	0.90182	0	-0.92821
Gm21969	ENSMUSG00000094439	0	0.963259	0	-1.04624
Stom	ENSMUSG00000026880	0	0.931787	0	-1.16787
Zfp12	ENSMUSG00000029587	0	0.891673	0	-0.806211
Arhgef11	ENSMUSG00000041977	0	0.906308	0	-1.32467
Carns1	ENSMUSG00000075289	0	0.938756	0	-0.922742
Rundc3a	ENSMUSG00000006575	0	0.976027	0	-1.56819
2610008E11Rik	ENSMUSG00000060301	0	0.870432	0	-0.844003
Gm16731	ENSMUSG00000085990	0	0.870432	0	-2.13733
Zfp661	ENSMUSG00000034800	0	0.906308	0	-1.1475
Prg4	ENSMUSG00000006014	0	0.94776	0	-1.73791
Zfp874a	ENSMUSG00000069206	0	0.870432	0	-0.77969
Adgrg5	ENSMUSG00000061577	0	0.837538	0	-1.78657
Igflr1	ENSMUSG00000036826	0	0.850751	0	-0.738724
Chic1	ENSMUSG00000031327	0	0.425376	0	-0.931185
Colq	ENSMUSG00000057606	0	0.608731	0	-0.66916
Abhd6	ENSMUSG00000025277	0	0.49094	0	-0.871601
H2-Oa	ENSMUSG00000024334	0	0.435216	0	-1.09607
Gabrr2	ENSMUSG00000023267	0	0.582667	0	-1.82985
Bckdhb	ENSMUSG00000032263	0	0.468026	0	-0.694941
Agrn	ENSMUSG00000041936	0	0.29334	0	-0.803038
Tmem120b	ENSMUSG00000054434	0	0.478675	0	-0.717531
Gabbr1	ENSMUSG00000024462	0	0.429766	0	-1.10136
Efnb1	ENSMUSG00000031217	0	0.458729	0	-1.06898
Hbp1	ENSMUSG00000002996	0	0.425376	0	-0.756093
Rnf32	ENSMUSG00000029130	0	0.425376	0	-2.08933
Cntn1	ENSMUSG00000055022	0	0.450887	0	-0.640237
Evi5l	ENSMUSG00000011832	0	0.461907	0	-1.23228
Basp1	ENSMUSG00000045763	0	0.425376	0	-0.668158
Hpgds	ENSMUSG00000029919	0	0.32655	0	-2.1199
Tcp11l2	ENSMUSG00000020034	0	0.470577	0	-1.69497
Myo6	ENSMUSG00000033577	0	0.262872	0	-1.87549
Tnip2	ENSMUSG00000059866	0	0.425376	0	-0.700673
Cul9	ENSMUSG00000040327	0	0.31724	0	-1.06176
Grk1	ENSMUSG00000031450	0	0.453154	0	-0.696097
Ephx1	ENSMUSG00000038776	0	0.455618	0	-2.15453
Dlg4	ENSMUSG00000020886	0	0.277813	0	-0.749642
Slc14a1	ENSMUSG00000059336	0	0.302103	0	-1.09814
Ttc16	ENSMUSG00000039021	0	0.286511	0	-0.599477
Ecm1	ENSMUSG00000028108	0	0.438812	0	-1.05774
Peg12	ENSMUSG00000070526	0	0.442394	0	-0.84441
Plxnd1	ENSMUSG00000030123	0	0.290144	0	-0.950529
Cbr1	ENSMUSG00000051483	0	0.425376	0	-0.693911
Tdrp	ENSMUSG00000050052	0	0.297224	0	-1.13399
Atcay	ENSMUSG00000034958	0	0.181262	0	-0.788911
Ugcg	ENSMUSG00000028381	0	0.127382	0	-0.73751
Mgarp	ENSMUSG00000037161	0	0.313718	0	-1.38355
Cnr2	ENSMUSG00000062585	0	0.320594	0	-1.65141
Tom1l2	ENSMUSG00000000538	0	0.243996	0	-0.998681
Pdlim4	ENSMUSG00000020388	0	0.332646	0	-1.80576
Rab6b	ENSMUSG00000032549	0	0.185666	0	-1.08797
Ncmap	ENSMUSG00000043924	0	0.290144	0	-1.29821
Meis3	ENSMUSG00000041420	0	0.281735	0	-1.33593
Asap2	ENSMUSG00000052632	0	0.148612	0	-0.653455
Cxxc5	ENSMUSG00000046668	0	0.211301	0	-1.6586
Susd4	ENSMUSG00000038576	0	0.147465	0	-2.47925
Bank1	ENSMUSG00000037922	0	0.148612	0	-1.01219
Pyroxd2	ENSMUSG00000060224	0	0.211301	0	-0.722658
Rnf213	ENSMUSG00000070327	0	0.171906	0	-1.01921
Mmp9	ENSMUSG00000017737	0	0.187567	0	-2.62243
Mgrn1	ENSMUSG00000022517	0	0.17015	0	-1.39569
Arhgap29	ENSMUSG00000039831	0	0.249763	0	-1.64948
Col22a1	ENSMUSG00000079022	0	0.145667	0	-0.8664
Whrn	ENSMUSG00000039137	0	0.183843	0	-1.57074
Lypd6b	ENSMUSG00000026765	0	0.138907	0	-1.40687
Gprc5b	ENSMUSG00000008734	0	0.226577	0	-1.39111
Ranbp10	ENSMUSG00000037415	0	0.13959	0	-0.677402
Glis3	ENSMUSG00000052942	0	0.187751	0	-1.64021
Rnf122	ENSMUSG00000039328	0	0.19467	0	-1.15444
Slc41a3	ENSMUSG00000030089	0	0.0939115	0	-0.6635
Plxna2	ENSMUSG00000026640	0	0.106344	0	-0.674949
Dock4	ENSMUSG00000035954	0	0.129473	0	-2.18675
Ptprf	ENSMUSG00000033295	0	0.13959	0	-1.29556
Rnf130	ENSMUSG00000020376	0	0	0	-0.659643
Mfsd2b	ENSMUSG00000037336	0	0	0	-1.10617
Ffar2	ENSMUSG00000051314	0	0	0	-1.05851
Car2	ENSMUSG00000027562	0	0	0	-2.52904
Brdt	ENSMUSG00000029279	0	0	0	-1.06341
Hif3a	ENSMUSG00000004328	0	0	0	-1.39943
H2-Q2	ENSMUSG00000091705	0	0	0	-4.26739
Fsd2	ENSMUSG00000038663	0	0	0	-1.08839
Angptl2	ENSMUSG00000004105	0	0	0	-3.15882
4930511M06Rik	ENSMUSG00000086607	0	0	0	-0.59646
Map7	ENSMUSG00000019996	0	0	0	-1.49663
Hsdl1	ENSMUSG00000034189	0	0	0	-0.713966
C920006O11Rik	ENSMUSG00000097574	0	0	0	-1.05617
Ciita	ENSMUSG00000022504	0	0	0	-1.00712
Zfp773	ENSMUSG00000063535	0	0	0	-1.34662
Bach2os	ENSMUSG00000086150	0	0	0	-1.37858
Cacna2d4	ENSMUSG00000041460	0	0	0	-1.57431
Nacad	ENSMUSG00000041073	0	0	0	-0.682132
Zscan26	ENSMUSG00000022228	0	0	0	-0.599247
Afp	ENSMUSG00000054932	0	0	0	-0.954997
Zfp937	ENSMUSG00000060336	0	0	0	-0.760993
Rdh12	ENSMUSG00000021123	0	0	0	-0.797959
Krtcap3	ENSMUSG00000029149	0	0	0	-0.635059
Gm20680	ENSMUSG00000093511	0	0	0	-0.90469
Arrdc4	ENSMUSG00000042659	0	0	0	-1.01991
Aldoc	ENSMUSG00000017390	0	0	0	-2.32862
Pard6g	ENSMUSG00000056214	0	0	0	-1.53043
Gm20069	ENSMUSG00000095174	0	0	0	-1.22553
Mettl27	ENSMUSG00000040557	0	0	0	-2.17332
Trip6	ENSMUSG00000023348	0	0	0	-0.846023
Slc13a1	ENSMUSG00000029700	0	0	0	-0.632399
Gpr83	ENSMUSG00000031932	0	0	0	-1.28965
Gm7976	ENSMUSG00000097551	0	0	0	-0.686117
Armcx2	ENSMUSG00000033436	0	0	0	-1.18825
1700088E04Rik	ENSMUSG00000033029	0	0	0	-0.735408
Tcn2	ENSMUSG00000020432	0	0	0	-1.58505
Zfp629	ENSMUSG00000045639	0	0	0	-1.02451
Tmc4	ENSMUSG00000019734	0	0	0	-1.17576
Pdk2	ENSMUSG00000038967	0	0	0	-0.955247
Chil5	ENSMUSG00000043873	0	0	0	-1.63872
Zc3h12b	ENSMUSG00000035045	0	0	0	-0.75145
Tlr1	ENSMUSG00000044827	0	0	0	-1.43658
Oasl1	ENSMUSG00000041827	0	0	0	-1.05085
Ddx60	ENSMUSG00000037921	0	0	0	-0.867992
Tmem63b	ENSMUSG00000036026	0	0	0	-0.956998
9930104L06Rik	ENSMUSG00000044730	0	0	0	-0.599882
Iigp1	ENSMUSG00000054072	0	0	0	-0.917828
Srsf12	ENSMUSG00000054679	0	0	0	-1.08345
Cyp2d22	ENSMUSG00000061740	0	0	0	-1.21143
Dpp7	ENSMUSG00000026958	0	0	0	-0.830919
AB124611	ENSMUSG00000057191	0	0	0	-0.651913
Ifit1bl1	ENSMUSG00000079339	0	0	0	-0.656198
Prickle3	ENSMUSG00000031145	0	0	0	-0.632391
Hcn3	ENSMUSG00000028051	0	0	0	-1.69536
Mdn1	ENSMUSG00000058006	0	0	0	-0.802441
Mgst2	ENSMUSG00000074604	0	0	0	-1.07256
Mfsd4a	ENSMUSG00000059149	0	0	0	-0.71332
Gm16124	ENSMUSG00000086914	0	0	0	-1.02219
Cir1	ENSMUSG00000041777	0	0	1.3751	-0.706982
Lyn	ENSMUSG00000042228	0	0	0	-0.891713
H2-Aa	ENSMUSG00000036594	0	0	0	-0.752491
Sv2a	ENSMUSG00000038486	0	0	0	-0.802264
Rflnb	ENSMUSG00000020846	0	0	0	-1.72357
Pik3c2a	ENSMUSG00000030660	0	0	0	-1.25747
Lpar6	ENSMUSG00000033446	0	0	0	-0.931224
Col20a1	ENSMUSG00000016356	0	0	0	-0.762406
Gm8113	ENSMUSG00000089901	0	0	0	-1.25748
Hsd17b11	ENSMUSG00000029311	0	0	0	-0.938446
Chn1os3	ENSMUSG00000086544	0	0	0	-2.67204
Wls	ENSMUSG00000028173	0	0	0	-0.751369
Laptm4b	ENSMUSG00000022257	0	0	0	-1.75381
Gigyf1	ENSMUSG00000029714	0	0	0	-0.91729
Trat1	ENSMUSG00000030775	0	0	0	-1.3782
Ramp3	ENSMUSG00000041046	0	0	0	-0.844284
Zmym5	ENSMUSG00000040123	0	0	0	-0.79934
Syk	ENSMUSG00000021457	0	0	0	-1.20207
Rps27	ENSMUSG00000090733	0	0	0	-0.645937
Efnb2	ENSMUSG00000001300	0	0	0	-0.704843
Cyp39a1	ENSMUSG00000023963	0	0	0	-1.70049
Lmbr1	ENSMUSG00000010721	0	0	0	-0.870631
Fam84a	ENSMUSG00000020607	0	0	0	-1.52915
Rgs11	ENSMUSG00000024186	0	0	0	-1.67819
Dag1	ENSMUSG00000039952	0	0	0	-0.589457
Cyp4x1	ENSMUSG00000047155	0	0	0	-0.642159
Rab4a	ENSMUSG00000019478	0	0	0	-0.887725
Zbtb10	ENSMUSG00000069114	0	0	0	-1.39044
Slfn5	ENSMUSG00000054404	0	0	0	-1.95548
Rbbp9	ENSMUSG00000027428	0	0	0	-0.766394
Jup	ENSMUSG00000001552	0	0	0	-0.913375
Il17rb	ENSMUSG00000015966	0	0	0	-0.697823
Ces2c	ENSMUSG00000061825	0	0	0	-2.82734
Abcc5	ENSMUSG00000022822	0	0	0	-1.58099
Cacnb1	ENSMUSG00000020882	0	0	0	-1.07408
Rgmb	ENSMUSG00000048027	0	0	0	-1.46954
Rras	ENSMUSG00000038387	0	0	0	-0.791508
Gm11707	ENSMUSG00000086481	0	0	0	-1.45235
Lrrc71	ENSMUSG00000023084	0	0	0	-1.09796
D130040H23Rik	ENSMUSG00000079038	0	0	0	-0.736863
Plcxd1	ENSMUSG00000064247	0	0	0	-0.650551
Cyp4f16	ENSMUSG00000048440	0	0	0	-0.733043
Lrrc23	ENSMUSG00000030125	0	0	0	-1.58048
Hey1	ENSMUSG00000040289	0	0	0	-1.02957
Ccs	ENSMUSG00000034108	0	0	0	-0.704278
9630013D21Rik	ENSMUSG00000059027	0	0	0	-1.11673
Zfp974	ENSMUSG00000070709	0	0	0	-1.04421
Zfp28	ENSMUSG00000062861	0	0	0	-1.19729
Mapk1ip1	ENSMUSG00000041775	0	0	0	-0.690558
Fam210b	ENSMUSG00000027495	0	0	0	-1.06751
Chst10	ENSMUSG00000026080	0	0	0	-0.67031
Irf6	ENSMUSG00000026638	0	0	0	-1.05907
Gm15708	ENSMUSG00000086894	0	0	0	-1.64629
Calcoco1	ENSMUSG00000023055	0	0	0	-1.61942
Gucy1b3	ENSMUSG00000028005	0	0	0	-1.10763
Ntn1	ENSMUSG00000020902	0	0	0	-2.68396
Rbm12b2	ENSMUSG00000052137	0	0	0	-0.60382
Nacc2	ENSMUSG00000026932	0	0	0	-1.05397
Gm14325	ENSMUSG00000095362	0	0	0	-0.903478
Dapl1	ENSMUSG00000026989	0	0	0	-1.79436
Cd200r3	ENSMUSG00000036172	0	0	0	-0.936107
Camkk1	ENSMUSG00000020785	0	0	0	-1.27592
Siah1a	ENSMUSG00000036840	0	0	0	-0.599889
Zfp420	ENSMUSG00000058402	0	0	0	-0.795442
Usp54	ENSMUSG00000034235	0	0	0	-0.906775
Rundc3b	ENSMUSG00000040570	0	0	0	-0.703445
Mapk11	ENSMUSG00000053137	0	0	0	-1.13155
Oas2	ENSMUSG00000032690	0	0	0	-1.01981
Jag2	ENSMUSG00000002799	0	0	0	-0.945243
H2-Ob	ENSMUSG00000041538	0	0	0	-1.64347
Cyp4f13	ENSMUSG00000024055	0	0	0	-0.83579
Zfp874b	ENSMUSG00000059839	0	0	0	-0.800424
Zfp459	ENSMUSG00000055560	0	0	0	-0.823387
Tmem8b	ENSMUSG00000078716	0	0	0	-1.02508
Zfp579	ENSMUSG00000051550	0	0	0	-1.39147
Rec8	ENSMUSG00000002324	0	0	0	-0.713853
Fam98c	ENSMUSG00000030590	0	0	0	-0.715772
Atp1a3	ENSMUSG00000040907	0	0	0	-2.03547
Ampd1	ENSMUSG00000070385	0	0	0	-1.39144
Plaur	ENSMUSG00000046223	0	0	0	-1.53474
Tgfb3	ENSMUSG00000021253	0	0	0	-3.92361
Zfp551	ENSMUSG00000034071	0	0	0	-1.68255
Trav14n-3	ENSMUSG00000076824	0	0	0	-0.659675
Nat14	ENSMUSG00000035285	0	0	0	-1.3668
Tgtp2	ENSMUSG00000078921	0	0	0	-0.802336
Sgtb	ENSMUSG00000042743	0	0	0	-1.54003
Nuak2	ENSMUSG00000009772	0	0	0	-0.870426
Jchain	ENSMUSG00000067149	0	0	0	-1.23986
9130019O22Rik	ENSMUSG00000030823	0	0	0	-0.599091
Pde1b	ENSMUSG00000022489	0	0	0	-1.1801
Tmie	ENSMUSG00000049555	0	0	0	-1.26392
Tppp	ENSMUSG00000021573	0	0	0	-1.9164
Prdm9	ENSMUSG00000051977	0	0	0	-0.957365
Il18bp	ENSMUSG00000070427	0	0	0	-0.641047
Gm15340	ENSMUSG00000085903	0	0	0	-1.72778
Ctss	ENSMUSG00000038642	0	0	1.24192	-0.647968
Irak3	ENSMUSG00000020227	0	0	0	-1.22039
Zdhhc23	ENSMUSG00000036304	0	0	0	-0.637458
Cerk	ENSMUSG00000035891	0	0	0	-0.760676
Txnrd3	ENSMUSG00000000811	0	0	0	-0.935294
Arhgef4	ENSMUSG00000037509	0	0	0	-1.03039
Itga7	ENSMUSG00000025348	0	0	0	-1.27802
Scamp1	ENSMUSG00000021687	0	0	0	-0.611919
Card14	ENSMUSG00000013483	0	0	0	-1.43307
Saraf	ENSMUSG00000031532	0	0	0	-0.629335
Parp6	ENSMUSG00000025237	0	0	0	-0.733505
E230016M11Rik	ENSMUSG00000087231	0	0	0.929223	-1.11553
Slpi	ENSMUSG00000017002	0	0	0	-1.87465
Zfp607a	ENSMUSG00000020420	0	0	0	-0.600848
Col11a2	ENSMUSG00000024330	0	0	0	-0.846885
Enpp5	ENSMUSG00000023960	0	0	0	-0.701916
Prkra	ENSMUSG00000002731	0	0	0	-0.947303
Cdk5r1	ENSMUSG00000048895	0	0	0	-1.59975
BC005561	ENSMUSG00000079065	0	0	0	-0.58987
Slc12a9	ENSMUSG00000037344	0	0	0	-0.728683
Kifc2	ENSMUSG00000004187	0	0	0	-0.998429
Gprasp1	ENSMUSG00000043384	0	0	0	-0.894409
Arhgap6	ENSMUSG00000031355	0	0	0	-1.34614
Vipr1	ENSMUSG00000032528	0	0	0	-1.58767
Zfp971	ENSMUSG00000074519	0	0	0	-0.668426
Rdh5	ENSMUSG00000025350	0	0	0	-0.647225
Diaph2	ENSMUSG00000034480	0	0	0	-0.629534
Insm1	ENSMUSG00000068154	0	0	0	-1.68072
Fam234a	ENSMUSG00000024187	0	0	0	-0.716288
Unc5a	ENSMUSG00000025876	0	0	0	-1.07684
Rell2	ENSMUSG00000044024	0	0	0	-0.886161
Pcmtd2	ENSMUSG00000027589	0	0	0	-0.74717
Ttc38	ENSMUSG00000035944	0	0	0	-0.683973
Pak6	ENSMUSG00000074923	0	0	0	-1.05495
Degs2	ENSMUSG00000021263	0	0	0	-1.73609
5031439G07Rik	ENSMUSG00000036046	0	0	0	-0.639871
Use1	ENSMUSG00000002395	0	0	0	-0.593182
Plxna3	ENSMUSG00000031398	0	0	0	-1.05722
Gm4841	ENSMUSG00000068606	0	0	0	-0.654566
Gm26767	ENSMUSG00000097258	0	0	0	-0.799997
Eid1	ENSMUSG00000091337	0	0	2.36351	-1.3705
Dnah8	ENSMUSG00000033826	0	0	0	-0.955269
Slc2a9	ENSMUSG00000005107	0	0	0	-0.652424
Dtx3	ENSMUSG00000040415	0	0	0	-0.611051
Dsp	ENSMUSG00000054889	0	0	0	-0.73748
Decr2	ENSMUSG00000036775	0	0	0	-0.598394
Rps6ka2	ENSMUSG00000023809	0	0	0	-1.26858
Ggt5	ENSMUSG00000006344	0	0	0	-1.47242
Btbd16	ENSMUSG00000040298	0	0	0	-0.622776
Tnfrsf14	ENSMUSG00000042333	0	0	0	-1.14754
Zfp866	ENSMUSG00000043090	0	0	0	-0.595941
Slc17a5	ENSMUSG00000049624	0	0	0	-1.07265
Cpne3	ENSMUSG00000028228	0	0	0	-0.946296
Gns	ENSMUSG00000034707	0	0	0	-0.649919
Ap3m2	ENSMUSG00000031539	0	0	0.813326	-0.778776
Prrt1	ENSMUSG00000015476	0	0	0	-0.767051
Gm5134	ENSMUSG00000033255	0	0	0	-0.585092
Mob3c	ENSMUSG00000028709	0	0	0	-0.710538
Arsa	ENSMUSG00000022620	0	0	0	-0.637379
Xkrx	ENSMUSG00000031258	0	0	0	-1.47277
Nucb2	ENSMUSG00000030659	0	0	0	-2.19972
Aqp9	ENSMUSG00000032204	0	0	0	-1.66776
Zfp442	ENSMUSG00000068130	0	0	0	-1.41092
Hspb11	ENSMUSG00000063172	0	0	0	-0.633197
Glcci1	ENSMUSG00000029638	0	0	0	-0.83789
Fbxo10	ENSMUSG00000048232	0	0	0	-0.797122
2009-03-01	ENSMUSG00000040502	0	0	0	-0.715475
Klc4	ENSMUSG00000003546	0	0	0	-1.15433
3300002I08Rik	ENSMUSG00000063364	0	0	0	-0.811246
Map3k9	ENSMUSG00000042724	0	0	0	-0.83766
Wdr13	ENSMUSG00000031166	0	0	0	-0.763442
Adam8	ENSMUSG00000025473	0	0	0	-0.963293
Gstk1	ENSMUSG00000029864	0	0	0	-0.785155
Plxnb1	ENSMUSG00000053646	0	0	0	-0.650742
Fam199x	ENSMUSG00000042595	0	0	0	-0.611007
Sez6l2	ENSMUSG00000030683	0	0	0	-1.25765
Gm14340	ENSMUSG00000074507	0	0	0	-0.681695
Car15	ENSMUSG00000090236	0	0	0	-0.921297
Trbv23	ENSMUSG00000076478	0	0	0	-0.747909
Rnf128	ENSMUSG00000031438	0	0	0	-1.77219
Acadsb	ENSMUSG00000030861	0	0	0	-0.641083
Slc2a6	ENSMUSG00000036067	0	0	0	-0.738527
Zscan10	ENSMUSG00000023902	0	0	0	-1.35761
Zfp708	ENSMUSG00000058883	0	0	0	-1.27146
Tulp2	ENSMUSG00000023467	0	0	0	-1.05953
Snn	ENSMUSG00000037972	0	0	0	-2.20204
Klrb1c	ENSMUSG00000030325	0	0	0	-2.46845
Dopey1	ENSMUSG00000034973	0	0	0	-0.720272
Il4	ENSMUSG00000000869	0	0	0	-5.15816
Zan	ENSMUSG00000079173	0	0	0	-3.02229
Cd40	ENSMUSG00000017652	0	0	0	-0.815603
Sdc4	ENSMUSG00000017009	0	0	0	-0.803153
A930024E05Rik	ENSMUSG00000056735	0	0	0.854182	-0.626995
Serpina3f	ENSMUSG00000066363	0	0	0	-0.78619
Klrb1f	ENSMUSG00000030154	0	0	0	-1.0319
Gm12474	ENSMUSG00000053957	0	0	0	-1.55063
Otub2	ENSMUSG00000021203	0	0	0	-0.67062
Ermap	ENSMUSG00000028644	0	0	0	-2.3816
Arhgap5	ENSMUSG00000035133	0	0	0	-1.12779

## Sheet: Malaria_NonDE
Gene Symbol	ENSEMBL ID	ChIP-seq c-Maf Score	Motif c-Maf Score	-log10 (BETA score)	-log2 (FC RNA-seq)
Szt2	ENSMUSG00000033253	0.876146	0.97335	0	-0.535315
Rab39b	ENSMUSG00000031202	0.858696	0.984138	0	0.676782
Gm16794	ENSMUSG00000097777	0.839127	0.992696	0	0.40424
Ggps1	ENSMUSG00000021302	0.972598	0.992501	0	-0.182382
Acad11	ENSMUSG00000090150	0.979873	0.963259	0	-0.488709
Gpr174	ENSMUSG00000073008	0.967803	0.891673	0	-0.500366
Cd4	ENSMUSG00000023274	0.570752	0.180364	0	-0.181603
Ttpal	ENSMUSG00000017679	0.92808	0.982605	0	-0.122351
Serinc3	ENSMUSG00000017707	0.972124	0.977755	0	0.470309
Gm12758	ENSMUSG00000085105	0.987511	0.95735	0	-0.0475856
Atg2b	ENSMUSG00000041341	0.999582	0.986146	0	-0.535054
Papola	ENSMUSG00000021111	0.9811	0.987567	0	0.292883
Memo1	ENSMUSG00000058704	0.980682	0.990438	0	0.484811
Xk	ENSMUSG00000015342	0.956262	0.951719	0	0.0859084
Gstm4	ENSMUSG00000027890	0.995233	0.996376	0	0.306557
Tcea1	ENSMUSG00000033813	0.986424	0.957154	0	0.263987
Cep120	ENSMUSG00000048799	0.95813	0.979149	0	-0.0706778
Adnp2	ENSMUSG00000053950	0.913138	0.963259	0	0.102088
2300009A05Rik	ENSMUSG00000032403	0.994035	0.977504	0	-0.419028
Atpaf1	ENSMUSG00000028710	0.909458	0.969504	0	-0.00395928
Nmrk1	ENSMUSG00000037847	0.911981	0.900399	0	-0.0512362
Ier5	ENSMUSG00000056708	0.959719	0.999192	0	-0.380866
Crlf2	ENSMUSG00000033467	0.882502	0.986285	0	-0.0246916
Zfp119b	ENSMUSG00000062101	0.942324	0.906308	0	-0.157549
Gnpda1	ENSMUSG00000052102	0.977142	0.976027	0	0.57813
Calm2	ENSMUSG00000036438	0.940708	0.988404	0	0.323965
Lactb2	ENSMUSG00000025937	0.849121	0.848535	0	0.500917
Blmh	ENSMUSG00000020840	0.999972	0.995986	0	0.439467
Tmem126a	ENSMUSG00000030615	0.8425	0.951719	0	0.185084
Prdx1	ENSMUSG00000028691	0.9576	0.960555	0	0.32539
Zfp429	ENSMUSG00000078994	0.933014	0.979734	0	-0.206117
Myl12a	ENSMUSG00000024048	0.933209	0.998801	0	0.0733674
Pbk	ENSMUSG00000022033	0.915953	0.98057	0	0.518662
Eif3a	ENSMUSG00000024991	0.918964	0.975804	0	0.374185
Cox18	ENSMUSG00000035505	0.998578	0.949265	0	0.157261
Fbxo7	ENSMUSG00000001786	0.964988	0.919215	0	-0.0984778
Zfp324	ENSMUSG00000004500	0.927243	0.891673	0	0.436575
Rab21	ENSMUSG00000020132	0.919076	0.994146	0	0.0825761
Swt1	ENSMUSG00000052748	0.962423	0.906308	0	-0.18387
Herpud2	ENSMUSG00000008429	0.94015	0.870432	0	0.0503588
Smdt1	ENSMUSG00000022452	0.955036	0.941154	0	0.101633
Zranb2	ENSMUSG00000028180	0.799877	0.968862	0	0.482563
Cbfb	ENSMUSG00000031885	0.856884	0.975943	0	0.399182
Snx13	ENSMUSG00000020590	0.97296	0.963259	0	-0.317954
Kbtbd7	ENSMUSG00000043881	0.923592	0.870432	0	0.290806
Akap10	ENSMUSG00000047804	0.967524	0.906308	0	-0.0049741
Wars	ENSMUSG00000021266	0.795696	0.906308	0	0.494141
Tpt1	ENSMUSG00000060126	0.990885	0.870432	0	-0.417504
A130010J15Rik	ENSMUSG00000079144	0.823488	0.997073	0	0.0896498
Bloc1s6	ENSMUSG00000005804	0.863351	0.906308	0	0.193931
Mrpl3	ENSMUSG00000032563	0.804282	0.95459	0	0.261435
Pigb	ENSMUSG00000079469	0.895492	0.963259	0	0.226332
Zfp266	ENSMUSG00000060510	0.968193	0.923815	0	-0.372479
Isy1	ENSMUSG00000030056	0.978145	0.90182	0	0.256337
Coq10b	ENSMUSG00000025981	0.807014	0.917027	0	0.204241
Yrdc	ENSMUSG00000028889	0.863323	0.920302	0	0.257843
Snrpc	ENSMUSG00000024217	0.993226	0.979344	0	0.533307
Cox16	ENSMUSG00000091803	0.991135	0.976027	0	-0.121946
Rab43	ENSMUSG00000030055	0.963566	0.955872	0	-0.412381
Eif1ax	ENSMUSG00000067194	0.807989	0.97335	0	0.531804
Usp16	ENSMUSG00000025616	0.917459	0.938756	0	0.12085
Lars	ENSMUSG00000024493	0.980988	0.933683	0	0.405807
Slc39a4	ENSMUSG00000063354	0.915117	0.906308	0	0.528198
Gstp1	ENSMUSG00000060803	0.980961	0.884788	0	-0.0991717
B230219D22Rik	ENSMUSG00000045767	0.914811	0.960555	0	-0.137637
Zfp87	ENSMUSG00000097333	0.970117	0.880021	0	-0.473521
Eed	ENSMUSG00000030619	0.841245	0.998857	0	0.518606
Sqstm1	ENSMUSG00000015837	0.84013	0.993561	0	-0.0297725
Sec22b	ENSMUSG00000027879	0.846207	0.923815	0	0.483378
Gm26920	ENSMUSG00000058447	0.913835	0.976027	0	-0.238843
Leng8	ENSMUSG00000035545	0.93215	0.951105	0	-0.413616
Prkab1	ENSMUSG00000029513	0.825746	0.956708	0	0.0860761
Rabggtb	ENSMUSG00000038975	0.868062	0.917459	0	0.290546
Mex3b	ENSMUSG00000057706	0.875477	0.969922	0	-8.27213e-05
Cep83	ENSMUSG00000020024	0.972765	0.865832	0	0.318215
Napa	ENSMUSG00000006024	0.929641	0.997017	0	-0.034441
Cd55	ENSMUSG00000026399	0.765144	0.999554	0	-0.521685
Fdx1l	ENSMUSG00000079677	0.865135	0.961782	0	0.307722
Nol11	ENSMUSG00000018433	0.987762	0.963008	0	0.426698
Irf9	ENSMUSG00000002325	0.922003	0.961782	0	-0.459847
Pdk3	ENSMUSG00000035232	0.906977	0.95459	0	0.426322
Zbtb6	ENSMUSG00000066798	0.994899	0.934909	0	-0.493859
Dnpep	ENSMUSG00000026209	0.9101	0.989491	0	0.326619
Hist2h2be	ENSMUSG00000068854	0.951077	0.972486	0	-0.326032
Rps9	ENSMUSG00000006333	0.933655	0.992223	0	-0.114144
Dimt1	ENSMUSG00000021692	0.979511	0.865832	0	0.307621
Smndc1	ENSMUSG00000025024	0.800658	0.987261	0	0.324781
Zfp677	ENSMUSG00000062743	0.957851	0.943997	0	-0.534901
Trbv12-1	ENSMUSG00000095574	0.964123	0.95735	0	-0.162757
Larp4	ENSMUSG00000023025	0.939899	0.920302	0	-0.0255134
Ufl1	ENSMUSG00000040359	0.98163	0.961782	0	0.175415
Tmem230	ENSMUSG00000027341	0.880634	0.906308	0	0.131878
Eml3	ENSMUSG00000071647	0.869484	0.976027	0	0.372735
Fbxo3	ENSMUSG00000027180	0.776378	0.963259	0	0.0749324
Psma7	ENSMUSG00000027566	0.909793	0.859532	0	0.445698
Trp53i13	ENSMUSG00000044328	0.896747	0.906308	0	0.558089
Gm20605	ENSMUSG00000029720	0.868285	0.95459	0	-0.141352
Vprbp	ENSMUSG00000040325	0.935495	0.850751	0	0.352082
Cyb561d1	ENSMUSG00000048796	0.729797	0.961141	0	-0.287321
Cab39l	ENSMUSG00000021981	0.868313	0.906308	0	0.513908
Ddx50	ENSMUSG00000020076	0.869038	0.953503	0	0.0167554
Timm13	ENSMUSG00000020219	0.953447	0.923815	0	0.283358
Zfp282	ENSMUSG00000025821	0.875505	0.941154	0	0.281
Zdhhc5	ENSMUSG00000034075	0.864634	0.906308	0	0.299359
Exosc3	ENSMUSG00000028322	0.91725	0.951161	0	0.413215
E230001N04Rik	ENSMUSG00000066170	0.909932	0.95735	0	0.45962
Zfp513	ENSMUSG00000043059	0.912915	0.90182	0	-0.551783
Prdx5	ENSMUSG00000024953	0.88713	0.926909	0	0.168921
Prdx2	ENSMUSG00000005161	0.945558	0.972904	0	0.0733957
Pgghg	ENSMUSG00000062031	0.823962	0.97335	0	-0.219054
Far1	ENSMUSG00000030759	0.837259	0.880021	0	0.532953
Smim20	ENSMUSG00000061461	0.92794	0.960555	0	0.133806
B3galt4	ENSMUSG00000067370	0.876202	0.97533	0	0.217396
Atp13a1	ENSMUSG00000031862	0.866278	0.961782	0	0.110856
Tmem18	ENSMUSG00000043061	0.938533	0.953503	0	-0.0875177
Ube2m	ENSMUSG00000005575	0.869707	0.920302	0	0.311023
Spg7	ENSMUSG00000000738	0.986982	0.837538	0	0.274755
Mlh1	ENSMUSG00000032498	0.803947	0.938756	0	0.362237
Mob4	ENSMUSG00000025979	0.819195	0.94776	0	0.120533
Bcl2l2	ENSMUSG00000089682	0.828283	0.950436	0	-0.0401522
Xrcc5	ENSMUSG00000026187	0.914532	0.972904	0	0.381252
Anks3	ENSMUSG00000022515	0.831907	0.938756	0	-0.577055
Tspyl3	ENSMUSG00000074671	0.707691	0.990104	0	0.0508464
Uba5	ENSMUSG00000032557	0.812756	0.998941	0	0.296985
Smim12	ENSMUSG00000042380	0.870083	0.913431	0	-0.0934301
Scyl3	ENSMUSG00000026584	0.840381	0.891673	0	-0.073437
H2-T22	ENSMUSG00000056116	0.809495	0.982494	0	-0.0714432
Tlk2	ENSMUSG00000020694	0.836005	0.884788	0	-0.0418438
Prkci	ENSMUSG00000037643	0.863351	0.90182	0	0.202931
Map1s	ENSMUSG00000019261	0.899116	0.945474	0	-0.111388
Psme2	ENSMUSG00000079197	0.890809	0.993338	0	0.206981
Anxa1	ENSMUSG00000024659	0.64405	0.884788	0	0.622639
Nsa2	ENSMUSG00000060739	0.913584	0.845204	0	-0.253675
Letm1	ENSMUSG00000005299	0.827976	0.92833	0	0.277288
Fkbp3	ENSMUSG00000020949	0.875993	0.891673	0	0.344587
Atp5g3	ENSMUSG00000018770	0.892593	0.837538	0	0.482751
Ulk2	ENSMUSG00000004798	0.975748	0.83344	0	-0.533414
Fdps	ENSMUSG00000059743	0.966103	0.897249	0	-0.548461
Med8	ENSMUSG00000006392	0.863742	0.859532	0	-0.0464313
Rab4b	ENSMUSG00000053291	0.737435	0.9857	0	0.187526
Zfp94	ENSMUSG00000074282	0.882614	0.983079	0	-0.328107
Khdrbs1	ENSMUSG00000028790	0.90274	0.917459	0	0.302396
Myo19	ENSMUSG00000020527	0.816882	0.963259	0	0.494646
Pan2	ENSMUSG00000005682	0.796672	0.926909	0	-0.030407
Tatdn3	ENSMUSG00000026632	0.793326	0.859532	0	-0.436122
Ormdl1	ENSMUSG00000026097	0.839629	0.961782	0	0.00650569
Lsm14a	ENSMUSG00000066568	0.90904	0.906308	0	0.0888296
Spty2d1	ENSMUSG00000049516	0.933599	0.859532	0	-0.0889362
Pfdn5	ENSMUSG00000001289	0.771583	0.945474	0	-0.385522
Hddc3	ENSMUSG00000030532	0.790288	0.941154	0	-0.143463
Zdhhc24	ENSMUSG00000006463	0.758426	0.977755	0	-0.254593
Dus1l	ENSMUSG00000025155	0.903521	0.906308	0	0.298491
Tmem55b	ENSMUSG00000035953	0.851142	0.963008	0	-0.177236
Faap20	ENSMUSG00000073684	0.887659	0.979985	0	0.0891765
Gstp3	ENSMUSG00000058216	0.970981	0.948471	0	0.208205
Dnajc18	ENSMUSG00000024350	0.886572	0.949265	0	-0.175877
Iba57	ENSMUSG00000049287	0.80746	0.963008	0	-0.267612
Rangap1	ENSMUSG00000022391	0.924567	0.845204	0	0.565023
2310057M21Rik	ENSMUSG00000040177	0.76913	0.870432	0	0.529266
Elob	ENSMUSG00000055839	0.958771	0.880021	0	0.487847
Zpbp2	ENSMUSG00000017195	0.936387	0.90182	0	0.614692
Tmem222	ENSMUSG00000028857	0.798484	0.9731	0	0.0218524
Rubcn	ENSMUSG00000035629	0.995484	0.850751	0	-0.334283
Fbxo22	ENSMUSG00000032309	0.776852	0.923815	0	0.133136
Slc20a1	ENSMUSG00000027397	0.828395	0.90182	0	0.440313
Tox4	ENSMUSG00000016831	0.847685	0.951719	0	-0.0483577
Srsf7	ENSMUSG00000024097	0.875673	0.83344	0	0.403041
Zbtb24	ENSMUSG00000019826	0.973211	0.850751	0	-0.243739
Cmpk2	ENSMUSG00000020638	0.799654	0.953503	0	0.397941
Rpl22l1	ENSMUSG00000039221	0.808798	0.963259	0	0.0902199
Atf5	ENSMUSG00000038539	0.858417	0.917459	0	0.367685
Zfp668	ENSMUSG00000049728	0.897304	0.92833	0	-0.266742
Mrfap1	ENSMUSG00000055302	0.75915	0.970089	0	0.0453501
2410002F23Rik	ENSMUSG00000045411	0.871073	0.897249	0	-0.0952562
Txndc17	ENSMUSG00000020803	0.917375	0.870432	0	-0.00715767
Alox8	ENSMUSG00000020891	0.868257	0.998049	0	-0.217443
Fam208a	ENSMUSG00000040651	0.874	0.906308	0	-0.274099
Tiprl	ENSMUSG00000040843	0.776852	0.94776	0	-0.0116147
Lyrm1	ENSMUSG00000030922	0.73186	0.982717	0	0.523582
Thap1	ENSMUSG00000037214	0.783096	0.985449	0	0.105816
Vps37a	ENSMUSG00000031600	0.849636	0.923815	0	-0.21365
Pomt2	ENSMUSG00000034126	0.974215	0.837538	0	0.22219
Gpat3	ENSMUSG00000029314	0.611509	0.884481	0	-0.627456
Hnrnph3	ENSMUSG00000020069	0.856884	0.963259	0	0.475488
3110002H16Rik	ENSMUSG00000024410	0.945558	0.859532	0	-0.150872
Parp2	ENSMUSG00000036023	0.828395	0.83344	0	0.460799
Mtpap	ENSMUSG00000024234	0.995512	0.880021	0	0.12936
Mcl1	ENSMUSG00000038612	0.968054	0.880021	0	-0.379461
Npepl1	ENSMUSG00000039263	0.727344	0.945474	0	-0.284037
Mylpf	ENSMUSG00000030672	0.874697	0.850751	0	0.0275998
Gm6904	ENSMUSG00000090881	0.693307	0.90182	0	0.514628
Mrpl51	ENSMUSG00000030335	0.75692	0.884788	0	0.406006
Nlrc3	ENSMUSG00000049871	0.753631	0.986424	0	-0.0977959
9930021J03Rik	ENSMUSG00000046138	0.821593	0.963259	0	-0.327248
4930522L14Rik	ENSMUSG00000072762	0.716137	0.837538	0	0.0219144
Wdr74	ENSMUSG00000042729	0.838569	0.984585	0	0.425202
Washc5	ENSMUSG00000022350	0.899033	0.926909	0	0.0865449
Spag7	ENSMUSG00000018287	0.894377	0.884788	0	0.325385
Zfp410	ENSMUSG00000042472	0.9055	0.90182	0	-0.000104218
Atp6v1h	ENSMUSG00000033793	0.786357	0.963259	0	-0.123359
Ube2j2	ENSMUSG00000023286	0.860341	0.83344	0	0.225624
Smim7	ENSMUSG00000044600	0.820924	0.891673	0	0.190299
Slc25a32	ENSMUSG00000022299	0.793466	0.963259	0	0.117154
Hsh2d	ENSMUSG00000062007	0.754105	0.951719	0	0.411724
Sdhaf3	ENSMUSG00000042505	0.914922	0.945474	0	0.324399
Zfp146	ENSMUSG00000037029	0.936136	0.906308	0	-0.210094
Rbm26	ENSMUSG00000022119	0.765255	0.90182	0	-0.179396
Ap2m1	ENSMUSG00000022841	0.856884	0.884788	0	0.245617
Cask	ENSMUSG00000031012	0.778078	0.998411	0	0.191237
Fem1b	ENSMUSG00000032244	0.951663	0.837538	0	0.103592
Ndufs5	ENSMUSG00000028648	0.840493	0.837538	0	0.461554
Nit2	ENSMUSG00000022751	0.907535	0.845204	0	-0.266817
Gtf2h3	ENSMUSG00000029387	0.74878	0.963259	0	0.252227
Tbc1d10c	ENSMUSG00000040247	0.94953	0.884509	0	-0.190598
Ftsj3	ENSMUSG00000020706	0.989546	0.865832	0	0.354217
Vbp1	ENSMUSG00000031197	0.618738	0.990271	0	0.486289
Ssbp1	ENSMUSG00000029911	0.856884	0.891673	0	0.221568
Atg16l2	ENSMUSG00000047767	0.926114	0.488877	0	-0.101279
Sprtn	ENSMUSG00000031986	0.787222	0.938756	0	-0.219206
Gmip	ENSMUSG00000036246	0.704597	0.945474	0	-0.401784
Lrrc49	ENSMUSG00000047766	0.845176	0.959747	0	1.06661
Vipas39	ENSMUSG00000021038	0.80024	0.859532	0	-0.220556
Apopt1	ENSMUSG00000037787	0.760349	0.989323	0	-0.170507
Trim27	ENSMUSG00000021326	0.910796	0.92833	0	0.385523
Ap5z1	ENSMUSG00000039623	0.703426	0.95459	0	-0.404231
Slc26a6	ENSMUSG00000023259	0.678895	0.968862	0	-0.194229
Fam160b2	ENSMUSG00000022095	0.765813	0.906308	0	-0.0656945
Zfp759	ENSMUSG00000057396	0.785688	0.996209	0	-0.37745
Zfp719	ENSMUSG00000030469	0.844061	0.877624	0	0.13398
Ube4a	ENSMUSG00000059890	0.866264	0.920302	0	0.276006
Gas2l3	ENSMUSG00000074802	0.639422	0.966279	0	0.252818
Srp19	ENSMUSG00000014504	0.867226	0.850751	0	0.503559
Tap1	ENSMUSG00000037321	0.85956	0.877624	0	0.177666
Plk2	ENSMUSG00000021701	0.832074	0.938756	0	0.161567
Rbbp5	ENSMUSG00000026439	0.814958	0.850751	0	0.263357
Them4	ENSMUSG00000028145	0.819195	0.850751	0	0.0422452
Papd4	ENSMUSG00000042167	0.820924	0.83344	0	0.122172
Zfp729b	ENSMUSG00000058093	0.685251	0.996432	0	-0.49062
Zmym3	ENSMUSG00000031310	0.727344	0.938756	0	-0.241476
Ndufs7	ENSMUSG00000020153	0.908566	0.90182	0	0.282528
Pcnp	ENSMUSG00000071533	0.757896	0.870432	0	0.147455
Uba7	ENSMUSG00000032596	0.734536	0.891673	0	-0.566844
Mlf2	ENSMUSG00000030120	0.698994	0.980292	0	0.452965
Patl1	ENSMUSG00000046139	0.84013	0.95735	0	0.0841344
Pdcd2	ENSMUSG00000014771	0.711036	0.906308	0	-0.056173
Ldah	ENSMUSG00000037669	0.755917	0.936052	0	0.137454
Mvp	ENSMUSG00000030681	0.728417	0.898461	0	0.245158
2310058D17Rik	ENSMUSG00000085379	0.833607	0.961782	0	0.3445
Dbnl	ENSMUSG00000020476	0.83252	0.837538	0	0.372697
Slc25a16	ENSMUSG00000071253	0.898587	0.850751	0	0.400447
Rnf24	ENSMUSG00000048911	0.627408	0.985226	0	-0.367672
Psmd6	ENSMUSG00000021737	0.773618	0.938756	0	0.446733
Mrpl53	ENSMUSG00000030037	0.754188	0.992167	0	0.337573
Rbm45	ENSMUSG00000042369	0.772601	0.956067	0	0.22821
Ccdc174	ENSMUSG00000034083	0.820589	0.880021	0	-0.0110643
Rab5b	ENSMUSG00000000711	0.718981	0.906308	0	-0.33535
Ppil3	ENSMUSG00000026035	0.697795	0.917459	0	0.124757
Fam84b	ENSMUSG00000072568	0.754969	0.949265	0	-0.304766
Sdr42e1	ENSMUSG00000034308	0.804142	0.95459	0	-0.242265
Npm1	ENSMUSG00000057113	0.832827	0.953503	0	0.2743
2410089E03Rik	ENSMUSG00000039801	0.885262	0.850751	0	-0.377589
Trnt1	ENSMUSG00000013736	0.729964	0.950436	0	0.0365525
Zfp689	ENSMUSG00000048921	0.815544	0.884788	0	0.0313906
Dbt	ENSMUSG00000000340	0.744292	0.850751	0	0.13687
Elovl1	ENSMUSG00000006390	0.661872	0.926184	0	0.272076
Pole4	ENSMUSG00000030042	0.745881	0.920511	0	0.317086
Dennd6a	ENSMUSG00000040818	0.868313	0.845204	0	-0.230956
Gpatch3	ENSMUSG00000028850	0.806428	0.906308	0	-0.26284
Med28	ENSMUSG00000015804	0.696457	0.990773	0	0.0613349
Hspa9	ENSMUSG00000024359	0.795473	0.906308	0	0.383005
Poc5	ENSMUSG00000021671	0.856884	0.859532	0	0.496784
Zfp777	ENSMUSG00000071477	0.864466	0.931787	0	-0.383384
Ddx18	ENSMUSG00000001674	0.778329	0.891673	0	0.236944
Tmem14c	ENSMUSG00000021361	0.744125	0.919215	0	0.413794
Foxo4	ENSMUSG00000042903	0.727344	0.850751	0	-0.240597
Zfp729a	ENSMUSG00000021510	0.682993	0.994592	0	-0.28928
Ift52	ENSMUSG00000017858	0.739665	0.906308	0	0.196087
Zfp524	ENSMUSG00000051184	0.795668	0.880021	0	0.0369857
Rabl3	ENSMUSG00000022827	0.858055	0.906308	0	0.29432
Cers5	ENSMUSG00000023021	0.742118	0.941154	0	0.308938
Papss1	ENSMUSG00000028032	0.801215	0.906308	0	0.140844
5430403G16Rik	ENSMUSG00000072763	0.823962	0.850751	0	-0.267121
Rplp2	ENSMUSG00000025508	0.682993	0.941154	0	-0.0965985
Sec61a2	ENSMUSG00000025816	0.816519	0.837538	0	-0.396628
Mettl14	ENSMUSG00000028114	0.703426	0.870432	0	0.38171
Crat	ENSMUSG00000026853	0.867867	0.884788	0	0.195454
Zfp398	ENSMUSG00000062519	0.764781	0.94776	0	-0.306306
Cstf3	ENSMUSG00000027176	0.652496	0.899869	0	0.559585
Slc35f6	ENSMUSG00000029175	0.708778	0.953503	0	-0.123377
Psmd7	ENSMUSG00000039067	0.61294	0.92833	0	0.566005
Nt5dc1	ENSMUSG00000039480	0.697293	0.97335	0	-0.045721
Zfp605	ENSMUSG00000023284	0.827029	0.837538	0	0.0101195
Cwc25	ENSMUSG00000018541	0.855044	0.92833	0	-0.0394265
Add1	ENSMUSG00000029106	0.759234	0.963259	0	0.451612
Zfp687	ENSMUSG00000019338	0.759234	0.837538	0	-0.30068
Slc12a2	ENSMUSG00000024597	0.757199	0.938756	0	0.262919
Pafah1b3	ENSMUSG00000005447	0.783765	0.837538	0	-0.236351
Zfp354c	ENSMUSG00000044807	0.934881	0.850751	0	-0.577368
Hnrnph1	ENSMUSG00000007850	0.907842	0.837538	0	0.17432
Zfp775	ENSMUSG00000007216	0.744292	0.920302	0	0.12368
Nat8f4	ENSMUSG00000068299	0.66964	0.999693	0	0.560685
Sgsm2	ENSMUSG00000038351	0.752265	0.871923	0	-0.13941
Sugp1	ENSMUSG00000011306	0.771695	0.90182	0	0.101478
Zrsr2	ENSMUSG00000031370	0.662532	0.880021	0	0.0610984
Slc29a2	ENSMUSG00000024891	0.892315	0.859532	0	-0.105325
Setd5	ENSMUSG00000034269	0.598407	0.948522	0	-0.209816
Cetn4	ENSMUSG00000045031	0.95748	0.659735	0	0.548065
Crk	ENSMUSG00000017776	0.724417	0.973211	0	-0.233467
Odc1	ENSMUSG00000011179	0.685251	0.986926	0	0.0848919
Gtf2f1	ENSMUSG00000002658	0.802275	0.859532	0	0.506246
Zc3h6	ENSMUSG00000042851	0.74078	0.865832	0	-0.275206
Rab5a	ENSMUSG00000017831	0.706186	0.859532	0	0.20739
Rpl5	ENSMUSG00000058558	0.724417	0.899869	0	-0.144432
Ficd	ENSMUSG00000053334	0.692387	0.906308	0	0.460179
Polr1c	ENSMUSG00000067148	0.868313	0.845204	0	-0.092667
Rnf34	ENSMUSG00000029474	0.744292	0.92833	0	0.132667
Snapc5	ENSMUSG00000032398	0.834611	0.837538	0	0.15316
Pitpna	ENSMUSG00000017781	0.801857	0.959747	0	0.207744
Fdxacb1	ENSMUSG00000037845	0.769409	0.845204	0	0.298003
Gphn	ENSMUSG00000047454	0.758797	0.873192	0	0.334278
Grpel2	ENSMUSG00000024580	0.722995	0.969727	0	-0.00917561
Zadh2	ENSMUSG00000049090	0.706437	0.894823	0	0.283753
Zfp235	ENSMUSG00000047603	0.690045	0.990912	0	-0.351445
Thap11	ENSMUSG00000036442	0.673766	0.951719	0	0.166354
Mccc1	ENSMUSG00000027709	0.716137	0.919215	0	-0.365647
Hint1	ENSMUSG00000020267	0.793243	0.980933	0	0.456037
Cbll1	ENSMUSG00000020659	0.741421	0.850751	0	0.0102619
Yars2	ENSMUSG00000022792	0.810192	0.951719	0	0.333425
Dusp23	ENSMUSG00000026544	0.681487	0.95459	0	-0.193339
AW209491	ENSMUSG00000039182	0.740222	0.865832	0	0.246979
Mien1	ENSMUSG00000002580	0.666044	0.959747	0	0.39449
Mrps26	ENSMUSG00000037740	0.63407	0.906308	0	0.341399
Adprh	ENSMUSG00000002844	0.662532	0.90182	0	0.293625
Mtx2	ENSMUSG00000027099	0.666044	0.987623	0	0.390089
Ap3s2	ENSMUSG00000063801	0.793326	0.884788	0	0.266909
Sdcbp	ENSMUSG00000028249	0.758035	0.884788	0	0.113754
Asxl1	ENSMUSG00000042548	0.972249	0.495414	0	-0.135854
Ube2k	ENSMUSG00000029203	0.787612	0.859532	0	0.281738
Ptbp2	ENSMUSG00000028134	0.618683	0.963259	0	-0.470502
Gm26816	ENSMUSG00000097380	0.810192	0.945474	0	0.185043
Bet1	ENSMUSG00000032757	0.708276	0.971789	0	0.414994
Cdc37l1	ENSMUSG00000024780	0.74761	0.891673	0	-0.0356197
Ccnj	ENSMUSG00000025010	0.693307	0.960555	0	-0.304033
Dhps	ENSMUSG00000060038	0.739665	0.837538	0	0.347649
Mrpl15	ENSMUSG00000033845	0.690045	0.906308	0	0.334585
Prr14l	ENSMUSG00000054280	0.720988	0.920302	0	-0.398056
Sec23b	ENSMUSG00000027429	0.602041	0.938756	0	0.546938
Dr1	ENSMUSG00000029265	0.662532	0.906308	0	0.281011
Rab33b	ENSMUSG00000027739	0.796922	0.865832	0	-0.10386
Clcn4	ENSMUSG00000000605	0.729964	0.877624	0	-0.147991
Dyrk3	ENSMUSG00000016526	0.640398	0.941154	0	-0.339309
Cdh24	ENSMUSG00000059674	0.821175	0.845204	0	-0.430077
Spns1	ENSMUSG00000030741	0.800909	0.870432	0	-0.319279
Vps33a	ENSMUSG00000029434	0.790288	0.850751	0	-0.129877
Nmd3	ENSMUSG00000027787	0.711036	0.899869	0	0.216458
Mvb12a	ENSMUSG00000031813	0.810192	0.845204	0	0.429067
Fpgs	ENSMUSG00000009566	0.693753	0.951468	0	0.368508
Bcl7b	ENSMUSG00000029681	0.728124	0.850751	0	-0.273844
Fam53a	ENSMUSG00000037339	0.729769	0.943997	0	-0.217293
Fam162a	ENSMUSG00000003955	0.833454	0.442394	0	0.261766
Eid2	ENSMUSG00000046058	0.610849	0.984696	0	-0.0498404
Pigs	ENSMUSG00000041958	0.708499	0.980933	0	0.137486
Zfp770	ENSMUSG00000040321	0.59772	0.891673	0	-0.0269514
Ireb2	ENSMUSG00000032293	0.667522	0.931787	0	0.240195
Fam122a	ENSMUSG00000074922	0.846849	0.891673	0	-0.114223
H2-DMa	ENSMUSG00000037649	0.782455	0.945474	0	-0.362277
Pomp	ENSMUSG00000029649	0.71292	0.772989	0	0.317119
Rnps1	ENSMUSG00000034681	0.722995	0.920302	0	0.462982
Asnsd1	ENSMUSG00000026095	0.742759	0.859532	0	0.286913
D2hgdh	ENSMUSG00000073609	0.664511	0.837538	0	-0.414635
Sri	ENSMUSG00000003161	0.799738	0.891673	0	0.0906255
Mpv17l	ENSMUSG00000022679	0.716137	0.899869	0	0.0141455
1700066M21Rik	ENSMUSG00000038323	0.704764	0.850751	0	0.315122
Zfp706	ENSMUSG00000062397	0.751317	0.865832	0	0.312594
Dusp28	ENSMUSG00000047067	0.654559	0.891673	0	-0.175202
2410131K14Rik	ENSMUSG00000032840	0.638252	0.987177	0	-0.474205
Csnk2a1	ENSMUSG00000074698	0.611379	0.943997	0	0.0489197
Ndufaf3	ENSMUSG00000070283	0.708193	0.906308	0	0.238858
Rpl10	ENSMUSG00000008682	0.654559	0.884788	0	-0.108419
Mapk8ip3	ENSMUSG00000024163	0.671034	0.983163	0	-0.439519
Zfp27	ENSMUSG00000062040	0.841413	0.94776	0	0.181592
Lsg1	ENSMUSG00000022538	0.722911	0.850751	0	0.16752
Nagk	ENSMUSG00000034744	0.711036	0.837538	0	-0.201756
Mrps2	ENSMUSG00000035772	0.816882	0.880021	0	0.431904
Mrps34	ENSMUSG00000038880	0.852229	0.92833	0	0.134014
Arid4b	ENSMUSG00000039219	0.707563	0.918914	0	-0.440657
Zfp68	ENSMUSG00000058291	0.643102	0.899869	0	-0.273946
Ptpn9	ENSMUSG00000032290	0.78304	0.910945	0	0.263278
Map2k1	ENSMUSG00000004936	0.696457	0.850751	0	0.0570711
Dad1	ENSMUSG00000022174	0.688261	0.956262	0	0.242624
Psmd3	ENSMUSG00000017221	0.695007	0.926909	0	0.569592
Itch	ENSMUSG00000027598	0.7812	0.884788	0	-0.124033
Cbl	ENSMUSG00000034342	0.821983	0.923773	0	-0.375458
Rpap1	ENSMUSG00000034032	0.690045	0.884788	0	0.377047
Cul2	ENSMUSG00000024231	0.648064	0.951719	0	0.303082
Zdhhc9	ENSMUSG00000036985	0.653667	0.970089	0	-0.404492
Lypla1	ENSMUSG00000025903	0.622502	0.83344	0	0.226436
Wdr45b	ENSMUSG00000025173	0.685251	0.870432	0	0.131259
Ninj1	ENSMUSG00000037966	0.689544	0.83344	0	-0.15264
Ovca2	ENSMUSG00000038268	0.740222	0.837538	0	0.23267
Ndufa6	ENSMUSG00000022450	0.63407	0.877624	0	-0.381409
Mapk6	ENSMUSG00000042688	0.828116	0.618311	0	0.266457
Tmem106b	ENSMUSG00000029571	0.805285	0.845204	0	-0.222542
Gimap5	ENSMUSG00000043505	0.980663	0.629331	0	-0.0520859
Phtf1	ENSMUSG00000058388	0.918525	0.697091	0	-0.106832
Rpp21	ENSMUSG00000024446	0.64497	0.906308	0	0.201188
Ddx3x	ENSMUSG00000000787	0.777381	0.891673	0	0.168658
Zfp263	ENSMUSG00000022529	0.660023	0.938756	0	-0.315905
Rrp1	ENSMUSG00000061032	0.783263	0.929933	0	0.115617
Ccdc9	ENSMUSG00000041375	0.610849	0.991832	0	-0.0831693
Traf3ip3	ENSMUSG00000037318	0.669703	0.715455	0	-0.202949
Mzt2	ENSMUSG00000022671	0.627185	0.983079	0	0.120089
Hsph1	ENSMUSG00000029657	0.607281	0.906308	0	-0.00590256
Snrnp48	ENSMUSG00000021431	0.685251	0.90182	0	-0.150443
Txndc9	ENSMUSG00000058407	0.664149	0.877624	0	0.203435
Smim3	ENSMUSG00000038059	0.947983	0.576789	0	0.308022
Ndufa7	ENSMUSG00000041881	0.822318	0.906308	0	0.041118
Dcxr	ENSMUSG00000039450	0.637471	0.865832	0	-0.373354
M6pr	ENSMUSG00000007458	0.637806	0.920302	0	0.451989
Tmem80	ENSMUSG00000025505	0.672316	0.870432	0	-0.101988
Cluap1	ENSMUSG00000014232	0.73409	0.467455	0	0.00254293
Fopnl	ENSMUSG00000022677	0.710144	0.899869	0	0.25691
Mrpl2	ENSMUSG00000002767	0.786357	0.83344	0	0.404928
Cep57l1	ENSMUSG00000019813	0.714116	0.945363	0	0.254331
Plcd4	ENSMUSG00000026173	0.658044	0.95735	0	0.27421
Gpatch4	ENSMUSG00000028069	0.678895	0.936052	0	0.164498
Zfp109	ENSMUSG00000074283	0.880634	0.850751	0	-0.220706
Kdm6bos	ENSMUSG00000085178	0.703259	0.950436	0	-0.195967
Fam212b	ENSMUSG00000048458	0.616006	0.891673	0	0.429235
Tmem234	ENSMUSG00000028797	0.685251	0.90182	0	-0.214892
Med11	ENSMUSG00000018923	0.702144	0.83344	0	0.399933
Rc3h1	ENSMUSG00000040423	0.604549	0.870432	0	-0.13023
Psmd11	ENSMUSG00000017428	0.638224	0.943997	0	0.288163
Dok1	ENSMUSG00000068335	0.97204	0.486313	0	0.0592479
Iqcc	ENSMUSG00000040795	0.648789	0.970089	0	-0.416291
Zbtb7a	ENSMUSG00000035011	0.920005	0.633624	0	-0.100253
Sik1	ENSMUSG00000024042	0.779964	0.911809	0	-0.153048
Zfp275	ENSMUSG00000031365	0.628551	0.917459	0	-0.2048
Pigq	ENSMUSG00000025728	0.805313	0.83344	0	0.28729
Rps19bp1	ENSMUSG00000051518	0.642823	0.880021	0	0.331398
Hgs	ENSMUSG00000025793	0.676665	0.870432	0	0.0570349
Morf4l2	ENSMUSG00000031422	0.624341	0.837538	0	0.161106
Cited2	ENSMUSG00000039910	0.924307	0.641188	0	-0.131864
D230025D16Rik	ENSMUSG00000031889	0.612661	0.897249	0	-0.166196
Skp1a	ENSMUSG00000036309	0.75837	0.850751	0	-0.225874
Cib1	ENSMUSG00000030538	0.688429	0.870432	0	0.0824289
1190007I07Rik	ENSMUSG00000063320	0.611379	0.837538	0	0.397142
Pus1	ENSMUSG00000029507	0.611379	0.920302	0	0.536846
Zfp672	ENSMUSG00000049755	0.654559	0.850751	0	-0.167313
Mrpl49	ENSMUSG00000007338	0.771555	0.891673	0	0.327704
Acsl1	ENSMUSG00000018796	0.661863	0.906308	0	0.170653
Usp34	ENSMUSG00000056342	0.51556	0.855778	0	-0.283807
Tnfrsf9	ENSMUSG00000028965	0.675536	0.613066	0	0.507503
Cog8	ENSMUSG00000031916	0.628551	0.83344	0	0.17363
Necap1	ENSMUSG00000030327	0.952778	0.469378	0	-0.16773
Dusp6	ENSMUSG00000019960	0.766315	0.562763	0	0.269459
Stx17	ENSMUSG00000061455	0.600424	0.945474	0	-0.139907
Irf3	ENSMUSG00000003184	0.622669	0.917459	0	-0.0814664
Dhcr24	ENSMUSG00000034926	0.674769	0.845204	0	0.0562102
Ly6e	ENSMUSG00000022587	0.593668	0.948522	0	0.29766
Ube2e3	ENSMUSG00000027011	0.919624	0.594449	0	-0.0843246
Trappc6a	ENSMUSG00000002043	0.726507	0.837538	0	0.159966
Atp2a3	ENSMUSG00000020788	0.68912	0.770607	0	0.503387
Pithd1	ENSMUSG00000028669	0.863937	0.491275	0	0.0551911
Cct4	ENSMUSG00000007739	0.679146	0.877624	0	0.2295
E2f6	ENSMUSG00000057469	0.678728	0.865832	0	0.532407
Klc2	ENSMUSG00000024862	0.610431	0.95735	0	-0.239468
Pdzd11	ENSMUSG00000015668	0.632509	0.845204	0	0.232431
Elac2	ENSMUSG00000020549	0.645137	0.884788	0	0.238011
Ascc2	ENSMUSG00000020412	0.546065	0.913333	0	0.0859238
Mlst8	ENSMUSG00000024142	0.694087	0.845204	0	0.0526059
Zfp947	ENSMUSG00000063383	0.662532	0.996627	0	-0.333024
Cmtr2	ENSMUSG00000046441	0.654559	0.83344	0	0.102857
Oxa1l	ENSMUSG00000000959	0.677529	0.920302	0	-0.0750637
Fgfr1op2	ENSMUSG00000040242	0.781061	0.558359	0	0.169212
Pgrmc2	ENSMUSG00000049940	0.655405	0.973964	0	0.344161
Csnk2b	ENSMUSG00000024387	0.709336	0.870432	0	0.327532
Slfn2	ENSMUSG00000072620	0.939992	0.613033	0	-0.355539
Actr2	ENSMUSG00000020152	0.560366	0.873192	0	0.354257
Psmc2	ENSMUSG00000028932	0.928986	0.475859	0	0.369401
Rabep1	ENSMUSG00000020817	0.605274	0.845204	0	-0.161906
Gm26508	ENSMUSG00000097614	0.708555	0.90182	0	0.173452
Fam160b1	ENSMUSG00000033478	0.870278	0.495651	0	-0.211974
Washc3	ENSMUSG00000020056	0.495582	0.941781	0	-0.254128
Ndufa3	ENSMUSG00000035674	0.644384	0.859532	0	0.271235
5031425E22Rik	ENSMUSG00000073147	0.712175	0.516608	0	-0.224734
Dnajb5	ENSMUSG00000036052	0.645973	0.837538	0	-0.568026
Lime1	ENSMUSG00000090077	0.591048	0.638233	0	-0.278914
Golga3	ENSMUSG00000029502	0.63407	0.83344	0	0.226104
Arl2	ENSMUSG00000024944	0.727901	0.850751	0	-0.173623
Retreg3	ENSMUSG00000017802	0.622139	0.859532	0	-0.381424
Hilpda	ENSMUSG00000043421	0.855211	0.478675	0	0.0914835
Tatdn1	ENSMUSG00000050891	0.869331	0.49876	0	0.0702151
Dpp8	ENSMUSG00000032393	0.619714	0.865832	0	0.0549282
Srbd1	ENSMUSG00000024135	0.423522	0.938227	0	0.541421
Zfp945	ENSMUSG00000059142	0.46259	0.878753	0	-0.553015
Naa20	ENSMUSG00000002728	0.867477	0.45091	0	0.20596
Ube2z	ENSMUSG00000014349	0.920316	0.41672	0	0.158837
Trip11	ENSMUSG00000021188	0.746286	0.422602	0	-0.153161
Usf2	ENSMUSG00000058239	0.597887	0.837538	0	-0.0186856
Lamtor4	ENSMUSG00000050552	0.842388	0.435216	0	-0.0911132
Gzmb	ENSMUSG00000015437	0.441781	0.453154	0	0.535979
Cct2	ENSMUSG00000034024	0.399228	0.913905	0	0.237315
Galt	ENSMUSG00000036073	0.597971	0.897249	0	-0.29478
Socs5	ENSMUSG00000037104	0.59207	0.594449	0	-0.228839
Tmem164	ENSMUSG00000047045	0.422955	0.59693	0	0.127341
Rpl11	ENSMUSG00000059291	0.829705	0.499763	0	-0.0435292
Capza1	ENSMUSG00000070372	0.342625	0.480891	0	0.342756
Slain2	ENSMUSG00000036087	0.844277	0.471936	0	-0.234321
Prmt5	ENSMUSG00000023110	0.78258	0.491763	0	0.499079
C330007P06Rik	ENSMUSG00000006423	0.473657	0.935634	0	0.0844462
Zfp329	ENSMUSG00000057894	0.607281	0.850751	0	-0.555812
Pdp1	ENSMUSG00000049225	0.40366	0.981922	0	0.47223
Cyb5r1	ENSMUSG00000026456	0.605748	0.837538	0	0.216466
Secisbp2	ENSMUSG00000035139	0.825579	0.453154	0	0.148676
Ogg1	ENSMUSG00000030271	0.771402	0.466841	0	0.300689
Adnp	ENSMUSG00000051149	0.833147	0.495707	0	-0.209171
Ermp1	ENSMUSG00000046324	0.92132	0.492041	0	0.363903
Mkrn1	ENSMUSG00000029922	0.820631	0.429766	0	-0.170877
Psmb4	ENSMUSG00000005779	0.922741	0.445837	0	0.421795
Kctd5	ENSMUSG00000016946	0.46043	0.918002	0	0.380764
Rabggta	ENSMUSG00000040472	0.879728	0.45091	0	-0.418273
Rack1	ENSMUSG00000020372	0.869303	0.488013	0	-0.0119155
Lsm11	ENSMUSG00000044847	0.858733	0.594449	0	0.489956
Gbp7	ENSMUSG00000040253	0.889499	0.435216	0	0.25571
Cd52	ENSMUSG00000000682	0.840855	0.440011	0	0.0878519
Cndp2	ENSMUSG00000024644	0.956346	0.310596	0	0.347586
Nsun3	ENSMUSG00000050312	0.355518	0.931467	0	0.3112
Psat1	ENSMUSG00000024640	0.444959	0.924902	0	0.490498
Bet1l	ENSMUSG00000025484	0.623477	0.656724	0	-0.128456
Pts	ENSMUSG00000032067	0.55769	0.612169	0	0.330908
Klhl36	ENSMUSG00000031828	0.32728	0.9393	0	0.0439579
Rnf216	ENSMUSG00000045078	0.387185	0.87531	0	-0.0700913
Gm26541	ENSMUSG00000097889	0.861971	0.471998	0	0.283006
Sod2	ENSMUSG00000006818	0.811878	0.480891	0	-0.0741807
Mrpl48	ENSMUSG00000030706	0.877052	0.472737	0	0.183719
Dnph1	ENSMUSG00000040658	0.64083	0.492404	0	0.678588
Os9	ENSMUSG00000040462	0.651303	0.558426	0	0.101224
Vps25	ENSMUSG00000078656	0.741995	0.742664	0	0.226667
Oas3	ENSMUSG00000032661	0.767416	0.460151	0	0.120899
Ctsz	ENSMUSG00000016256	0.777883	0.461907	0	-0.0733058
Rbl2	ENSMUSG00000031666	0.583875	0.438069	0	0.154446
Mterf2	ENSMUSG00000049038	0.321412	0.941781	0	-0.187807
Cnot6l	ENSMUSG00000034724	0.738773	0.45091	0	-0.00740939
Rock2	ENSMUSG00000020580	0.649922	0.656148	0	0.182911
Dhcr7	ENSMUSG00000058454	0.319126	0.966117	0	-0.0171149
Dleu2	ENSMUSG00000097589	0.941558	0.41672	0	0.0130761
Ifrd1	ENSMUSG00000001627	0.585101	0.323363	0	0.3763
Ino80c	ENSMUSG00000047989	0.871231	0.279179	0	0.353925
Slc25a19	ENSMUSG00000020744	0.553926	0.623579	0	0.258578
Midn	ENSMUSG00000035621	0.83351	0.470577	0	-0.136219
Tsc22d2	ENSMUSG00000027806	0.612452	0.721622	0	-0.509124
Ghitm	ENSMUSG00000041028	0.639924	0.6489	0	-0.0448153
Cnga1	ENSMUSG00000067220	0.661835	0.47135	0	-0.36374
Pih1d1	ENSMUSG00000003423	0.374948	0.895548	0	0.330943
Bbs4	ENSMUSG00000025235	0.618172	0.636245	0	-0.334715
Atg3	ENSMUSG00000022663	0.66695	0.480891	0	0.137677
Milr1	ENSMUSG00000040528	0.678358	0.69898	0	-0.091956
Cdkn1a	ENSMUSG00000023067	0.814415	0.429766	0	0.188111
Tmem167b	ENSMUSG00000068732	0.826053	0.445837	0	0.0308001
Ddx6	ENSMUSG00000032097	0.809736	0.653453	0	-0.568281
Eif2b5	ENSMUSG00000003235	0.886921	0.475218	0	0.417199
Mepce	ENSMUSG00000029726	0.858947	0.440011	0	-0.314246
Cutc	ENSMUSG00000025193	0.676755	0.455698	0	0.435905
Gm15541	ENSMUSG00000087371	0.368174	0.972988	0	0.566378
Trac	ENSMUSG00000076928	0.720012	0.486675	0	-0.182979
Fndc3a	ENSMUSG00000033487	0.804282	0.461907	0	-0.364387
Rnpep	ENSMUSG00000041926	0.782919	0.321086	0	0.463715
Myd88	ENSMUSG00000032508	0.808254	0.429766	0	0.0823675
Ndst2	ENSMUSG00000039308	0.893193	0.489505	0	-0.224486
Phc3	ENSMUSG00000037652	0.653263	0.477762	0	-0.434945
Sdhb	ENSMUSG00000009863	0.853163	0.425376	0	0.467412
Sirt2	ENSMUSG00000015149	0.823718	0.48163	0	-0.106543
Impact	ENSMUSG00000024423	0.808742	0.435216	0	-0.236791
Ccny	ENSMUSG00000024286	0.750118	0.453154	0	-0.208626
Tomm5	ENSMUSG00000078713	0.467929	0.499665	0	0.363265
AI314180	ENSMUSG00000050812	0.612922	0.657746	0	0.179854
Eif4e2	ENSMUSG00000026254	0.779235	0.49862	0	0.0531609
Elac1	ENSMUSG00000036941	0.779556	0.453154	0	0.0509392
Pik3r3	ENSMUSG00000028698	0.69116	0.473762	0	-0.534866
Strip1	ENSMUSG00000014601	0.66256	0.623273	0	-0.040767
Alas1	ENSMUSG00000032786	0.754411	0.418769	0	0.283275
Rmdn3	ENSMUSG00000070730	0.728389	0.496892	0	0.404106
Ypel5	ENSMUSG00000039770	0.744557	0.435216	0	-0.353024
Tpd52l2	ENSMUSG00000000827	0.761896	0.461907	0	0.397144
Kdelc1	ENSMUSG00000026047	0.336827	0.904566	0	0.395325
Gpr89	ENSMUSG00000028096	0.691797	0.313681	0	0.441006
Rsbn1	ENSMUSG00000044098	0.877136	0.488877	0	-0.54824
Tob1	ENSMUSG00000037573	0.795473	0.442394	0	-0.21918
Tmem154	ENSMUSG00000056498	0.734382	0.48458	0	-0.199013
Xrcc3	ENSMUSG00000021287	0.802763	0.495791	0	0.27026
Trim33	ENSMUSG00000033014	0.516266	0.655145	0	0.107875
Casc4	ENSMUSG00000060227	0.396886	0.921515	0	-0.00484846
Nxn	ENSMUSG00000020844	0.788699	0.49954	0	0.478202
Vezt	ENSMUSG00000036099	0.683809	0.279805	0	0.134383
Psma3	ENSMUSG00000060073	0.776447	0.499638	0	0.224038
Stam2	ENSMUSG00000055371	0.348967	0.890921	0	0.202207
4833407H14Rik	ENSMUSG00000097779	0.472026	0.499456	0	-0.0911692
Eif4ebp2	ENSMUSG00000020091	0.699523	0.580288	0	-0.141635
Hnrnpf	ENSMUSG00000042079	0.717127	0.432916	0	0.335631
Capn2	ENSMUSG00000026509	0.76414	0.302103	0	0.552559
Atxn7l3	ENSMUSG00000059995	0.824185	0.458729	0	0.287327
Uxs1	ENSMUSG00000057363	0.638168	0.677592	0	0.582041
U2surp	ENSMUSG00000032407	0.442296	0.422602	0	0.357354
Dmtf1	ENSMUSG00000042508	0.830597	0.494383	0	-0.302065
Bri3bp	ENSMUSG00000037905	0.693851	0.425376	0	0.368158
Metap2	ENSMUSG00000036112	0.537964	0.557149	0	0.560382
Tprgl	ENSMUSG00000029030	0.717448	0.48163	0	-0.230185
Btbd19	ENSMUSG00000073771	0.698889	0.460869	0	-0.471241
Aaed1	ENSMUSG00000021482	0.827294	0.468026	0	-0.411824
Traf6	ENSMUSG00000027164	0.809244	0.48057	0	0.00847598
Helz2	ENSMUSG00000027580	0.77037	0.460151	0	-0.359281
Rexo2	ENSMUSG00000032026	0.83574	0.475553	0	0.28705
Casd1	ENSMUSG00000015189	0.376941	0.956611	0	-0.229122
Zfr	ENSMUSG00000022201	0.58971	0.653416	0	0.164216
Hnrnpl	ENSMUSG00000015165	0.610515	0.517954	0	0.281136
Rad52	ENSMUSG00000030166	0.805968	0.435216	0	-0.355203
BC004004	ENSMUSG00000052712	0.394106	0.698234	0	0.476395
Atad2b	ENSMUSG00000052812	0.601771	0.637248	0	-0.180903
Ube2g1	ENSMUSG00000020794	0.741324	0.453154	0	0.0572754
Lrp8	ENSMUSG00000028613	0.528327	0.62633	0	0.369038
Cpeb2	ENSMUSG00000039782	0.770106	0.442394	0	-0.383973
Cstb	ENSMUSG00000005054	0.731344	0.480891	0	-0.231729
Cdc42ep3	ENSMUSG00000036533	0.66518	0.589859	0	-0.510575
Eif4ebp1	ENSMUSG00000031490	0.839475	0.477936	0	-0.455845
Prr5l	ENSMUSG00000032841	0.698325	0.267123	0	-0.0865104
Casp8	ENSMUSG00000026029	0.635111	0.600749	0	0.0994001
Adat3	ENSMUSG00000035370	0.89552	0.425376	0	-0.0474505
Clasp1	ENSMUSG00000064302	0.603543	0.545586	0	0.562366
Ptbp1	ENSMUSG00000006498	0.823154	0.442394	0	0.367435
N4bp2l2	ENSMUSG00000029655	0.792815	0.306767	0	-0.0857219
Gm16008	ENSMUSG00000087381	0.84211	0.29334	0	-0.202326
Zfp84	ENSMUSG00000046185	0.785089	0.466841	0	-0.351628
Ngly1	ENSMUSG00000021785	0.569303	0.567558	0	-0.267872
Ap5b1	ENSMUSG00000049562	0.598584	0.618106	0	-0.131133
Ubap2	ENSMUSG00000028433	0.701767	0.696345	0	0.315116
Gadd45gip1	ENSMUSG00000033751	0.701739	0.472737	0	0.438874
2210016F16Rik	ENSMUSG00000021550	0.719092	0.467455	0	0.347906
Tes	ENSMUSG00000029552	0.610561	0.589859	0	0.304858
Ammecr1	ENSMUSG00000042225	0.527909	0.317834	0	0.270059
Fbxl2	ENSMUSG00000032507	0.372732	0.454973	0	0.0398618
Gnai3	ENSMUSG00000000001	0.843037	0.479783	0	-0.000187793
Pkn3	ENSMUSG00000026785	0.835015	0.460151	0	0.391931
Ivns1abp	ENSMUSG00000023150	0.832427	0.323697	0	-0.0478373
Klc1	ENSMUSG00000021288	0.831419	0.499345	0	0.211974
Gosr2	ENSMUSG00000020946	0.379617	0.875756	0	0.256641
Ccdc94	ENSMUSG00000003208	0.537619	0.589859	0	0.0130473
4933427D14Rik	ENSMUSG00000020807	0.485288	0.48786	0	-0.409066
Anapc16	ENSMUSG00000020107	0.610766	0.615876	0	-0.0437244
B9d2	ENSMUSG00000063439	0.698353	0.464165	0	0.195126
Senp1	ENSMUSG00000033075	0.920265	0.286511	0	0.00798674
Cfl1	ENSMUSG00000056201	0.755861	0.494467	0	0.461015
Tsc1	ENSMUSG00000026812	0.675708	0.589859	0	-0.40928
Lrig2	ENSMUSG00000032913	0.540815	0.595954	0	-0.362463
Tnks2	ENSMUSG00000024811	0.730187	0.465894	0	-0.0962565
Cd164	ENSMUSG00000019818	0.680888	0.442394	0	-0.0299298
Riok3	ENSMUSG00000024404	0.859351	0.478577	0	0.0162178
Qsox1	ENSMUSG00000033684	0.76539	0.463255	0	-0.107503
Ifi206	ENSMUSG00000037849	0.416107	0.438812	0	-0.233852
Nedd4	ENSMUSG00000032216	0.477362	0.529	0	0.733453
Man1a	ENSMUSG00000003746	0.801463	0.457327	0	-0.0718111
Tmbim6	ENSMUSG00000023010	0.781549	0.425376	0	0.183434
E2f3	ENSMUSG00000016477	0.432519	0.669501	0	0.582657
Uqcc1	ENSMUSG00000005882	0.789159	0.435216	0	0.0574754
Exosc8	ENSMUSG00000027752	0.796068	0.300607	0	0.542257
Lrrc58	ENSMUSG00000034158	0.567205	0.663768	0	-0.184862
Hnrnpul1	ENSMUSG00000040725	0.735205	0.445837	0	0.391149
Zfp142	ENSMUSG00000026135	0.334834	0.45091	0	0.172242
Rpl8	ENSMUSG00000003970	0.631097	0.613535	0	0.0490414
Rbpj	ENSMUSG00000039191	0.833566	0.173688	0	-0.0260153
Comtd1	ENSMUSG00000021773	0.784657	0.432916	0	0.141129
Ifi214	ENSMUSG00000070501	0.386028	0.487637	0	-0.404412
Mettl17	ENSMUSG00000004561	0.723204	0.425376	0	-0.216572
Otud5	ENSMUSG00000031154	0.65691	0.555627	0	-0.263418
Eci2	ENSMUSG00000021417	0.738006	0.438812	0	-0.170614
Inpp5d	ENSMUSG00000026288	0.768106	0.470674	0	-0.328244
Mfsd11	ENSMUSG00000020818	0.871686	0.442394	0	-0.0715917
Gapdh	ENSMUSG00000057666	0.814596	0.29334	0	0.384366
Gtpbp8	ENSMUSG00000022668	0.914755	0.418769	0	-0.270251
Adam10	ENSMUSG00000054693	0.831963	0.246007	0	0.0372487
Mettl3	ENSMUSG00000022160	0.446445	0.567168	0	0.171561
E130308A19Rik	ENSMUSG00000045071	0.659124	0.226577	0	-0.439343
Akirin2	ENSMUSG00000028291	0.565829	0.577221	0	0.226631
Prpf4b	ENSMUSG00000021413	0.696457	0.425376	0	0.0250199
Nckap1	ENSMUSG00000027002	0.810317	0.461907	0	0.143364
Cltc	ENSMUSG00000047126	0.666016	0.627436	0	0.0556475
Snap23	ENSMUSG00000027287	0.434045	0.418769	0	-0.160698
Eif4a1	ENSMUSG00000059796	0.883589	0.288611	0	0.37908
Polg	ENSMUSG00000039176	0.819767	0.48163	0	-0.292655
Zzz3	ENSMUSG00000039068	0.585757	0.465002	0	-0.107716
Ttll12	ENSMUSG00000016757	0.52946	0.621219	0	0.381816
Tpp2	ENSMUSG00000041763	0.613442	0.313718	0	0.137377
Slc16a10	ENSMUSG00000019838	0.64687	0.631478	0	-0.57537
Rpa1	ENSMUSG00000000751	0.738006	0.429766	0	0.50313
Psmd4	ENSMUSG00000005625	0.909059	0.277813	0	0.0994883
Tmem168	ENSMUSG00000029569	0.408148	0.491108	0	0.464367
Dtwd2	ENSMUSG00000024505	0.891283	0.313718	0	0.357789
Slc25a5	ENSMUSG00000016319	0.652078	0.453154	0	0.435721
Tor1aip1	ENSMUSG00000026466	0.470716	0.591178	0	0.175797
Arhgap35	ENSMUSG00000058230	0.818749	0.440011	0	-0.368174
Xpo1	ENSMUSG00000020290	0.857915	0.225455	0	0.409359
Zfp51	ENSMUSG00000023892	0.573217	0.592247	0	-0.310822
Eloc	ENSMUSG00000079658	0.616713	0.625837	0	0.380409
Unc119b	ENSMUSG00000046562	0.403716	0.69792	0	0.188843
Fbxw8	ENSMUSG00000032867	0.308421	0.548898	0	0.527348
Sppl2a	ENSMUSG00000027366	0.781939	0.460151	0	0.239119
Smg5	ENSMUSG00000001415	0.748139	0.432916	0	0.0779775
Arrdc2	ENSMUSG00000002910	0.610952	0.615672	0	-0.478326
Hipk1	ENSMUSG00000008730	0.748125	0.422602	0	-0.145277
Eaf1	ENSMUSG00000021890	0.819391	0.309443	0	0.213166
Zfp617	ENSMUSG00000066880	0.329022	0.895548	0	-0.0990448
Ap1g2	ENSMUSG00000040701	0.536011	0.591522	0	0.191873
Rpl17	ENSMUSG00000062328	0.387074	0.904064	0	0.253708
Glipr1	ENSMUSG00000056888	0.615526	0.216458	0	0.456714
1110038B12Rik	ENSMUSG00000092203	0.742285	0.442394	0	0.0302674
Bcl10	ENSMUSG00000028191	0.29768	0.607839	0	-0.176063
Noc3l	ENSMUSG00000024999	0.447537	0.442394	0	0.364139
Traf1	ENSMUSG00000026875	0.756132	0.423418	0	-0.0639327
Tspan32os	ENSMUSG00000052281	0.389492	0.476138	0	-0.1338
Cd99l2	ENSMUSG00000035776	0.576655	0.60887	0	-0.377773
Uhrf1bp1l	ENSMUSG00000019951	0.678212	0.465127	0	-0.250531
Tagap	ENSMUSG00000033450	0.832492	0.244292	0	-0.227742
Rpl28	ENSMUSG00000030432	0.770147	0.47388	0	-0.135898
Lmbr1l	ENSMUSG00000022999	0.698102	0.445837	0	-0.57142
Ptpn22	ENSMUSG00000027843	0.733818	0.359355	0	-0.115457
Golga4	ENSMUSG00000038708	0.394113	0.461907	0	0.0720704
Slc39a10	ENSMUSG00000025986	0.744638	0.532936	0	0.14966
Kpna1	ENSMUSG00000022905	0.725239	0.479873	0	0.085454
Akt3	ENSMUSG00000019699	0.580437	0.567168	0	-0.112926
Mrpl58	ENSMUSG00000018858	0.509501	0.629619	0	0.273912
Ide	ENSMUSG00000056999	0.479344	0.470577	0	0.193302
Hemk1	ENSMUSG00000032579	0.753719	0.301949	0	0.138056
Aig1	ENSMUSG00000019806	0.677717	0.212688	0	-0.143116
Ralgapb	ENSMUSG00000027652	0.580018	0.315158	0	-0.144036
Nvl	ENSMUSG00000026516	0.579591	0.286511	0	0.348854
Sfmbt1	ENSMUSG00000006527	0.823837	0.425376	0	0.57684
Ldha	ENSMUSG00000063229	0.731237	0.330713	0	0.488775
Zfp445	ENSMUSG00000047036	0.416804	0.489867	0	-0.520215
Zfp251	ENSMUSG00000022526	0.646043	0.461907	0	-0.0496051
Sart1	ENSMUSG00000039148	0.348967	0.898461	0	0.234613
Cetn3	ENSMUSG00000021537	0.54784	0.573021	0	0.436302
Tnf	ENSMUSG00000024401	0.872118	0.41672	0	0.336956
Bmpr2	ENSMUSG00000067336	0.836953	0.45091	0	-0.435667
Trbv1	ENSMUSG00000076461	0.323874	0.576655	0	-0.205473
Pabpc1	ENSMUSG00000022283	0.65734	0.464165	0	-0.109127
Extl2	ENSMUSG00000027963	0.414197	0.453154	0	0.353852
4930581F22Rik	ENSMUSG00000070315	0.336827	0.435216	0	-0.261173
Smurf2	ENSMUSG00000018363	0.358069	0.913891	0	-0.494719
C87436	ENSMUSG00000046679	0.570122	0.628356	0	-0.389311
Cdkl2	ENSMUSG00000029403	0.55007	0.558359	0	0.427098
Sdad1	ENSMUSG00000029415	0.554289	0.302103	0	-0.0795053
Mmaa	ENSMUSG00000037022	0.699788	0.442373	0	-0.242308
Rheb	ENSMUSG00000028945	0.524052	0.646577	0	0.134634
Nptn	ENSMUSG00000032336	0.322638	0.635046	0	0.342747
Mcrip1	ENSMUSG00000061111	0.722716	0.45091	0	-0.0823562
Card19	ENSMUSG00000037960	0.688326	0.329124	0	0.252426
Cfap20	ENSMUSG00000031796	0.828612	0.17945	0	0.547886
Phip	ENSMUSG00000032253	0.571338	0.353915	0	-0.390107
Trrap	ENSMUSG00000045482	0.588688	0.332432	0	-0.33476
Gnptab	ENSMUSG00000035311	0.680713	0.0713007	0	0.519754
Tpk1	ENSMUSG00000029735	0.571386	0.301768	0	0.102646
Arpc1b	ENSMUSG00000029622	0.683913	0.379104	0	0.190619
Ttc21b	ENSMUSG00000034848	0.539607	0.320594	0	0.416669
Hnrnpdl	ENSMUSG00000029328	0.607298	0.379439	0	0.100994
Cops7a	ENSMUSG00000030127	0.401137	0.422602	0	0.309244
Mdfic	ENSMUSG00000041390	0.674161	0.385118	0	0.235245
Ppp4r3a	ENSMUSG00000041846	0.4267	0.48057	0	0.091937
Aldh9a1	ENSMUSG00000026687	0.497923	0.48163	0	0.334207
Pex19	ENSMUSG00000003464	0.622669	0.425376	0	-0.0511694
Camk2g	ENSMUSG00000021820	0.481036	0.583241	0	0.452972
Adarb1	ENSMUSG00000020262	0.663708	0.376445	0	0.0896638
Pofut2	ENSMUSG00000020260	0.429027	0.435216	0	0.466434
Dnase2a	ENSMUSG00000003812	0.319739	0.633912	0	-0.181981
Inpp5k	ENSMUSG00000006127	0.661584	0.465894	0	-0.33685
Banp	ENSMUSG00000025316	0.344646	0.440875	0	-0.120191
Lin54	ENSMUSG00000035310	0.550971	0.466688	0	0.469984
Gtpbp4	ENSMUSG00000021149	0.404399	0.442394	0	0.32577
Cdkl3	ENSMUSG00000020389	0.689279	0.464946	0	0.375941
Gmfg	ENSMUSG00000060791	0.750202	0.325268	0	-0.126726
Eml2	ENSMUSG00000040811	0.848438	0.216458	0	0.144814
Slc25a26	ENSMUSG00000045100	0.665715	0.185666	0	-0.111764
Mirt1	ENSMUSG00000097636	0.641395	0.245965	0	-0.567578
Ambra1	ENSMUSG00000040506	0.4591	0.665451	0	-0.232334
Ndufs4	ENSMUSG00000021764	0.334095	0.418769	0	0.156263
Ddx54	ENSMUSG00000029599	0.386028	0.694317	0	0.298466
Agfg1	ENSMUSG00000026159	0.568306	0.443997	0	0.106354
Fosl2	ENSMUSG00000029135	0.425222	0.445837	0	-0.450323
Cltb	ENSMUSG00000047547	0.691342	0.432916	0	0.166719
Epc1	ENSMUSG00000024240	0.322694	0.899107	0	-0.469416
Ggt7	ENSMUSG00000027603	0.511276	0.584581	0	-0.329625
Ccr9	ENSMUSG00000029530	0.384024	0.266125	0	0.110906
Rbl1	ENSMUSG00000027641	0.783672	0.283584	0	0.522249
Pik3cg	ENSMUSG00000020573	0.744538	0.194018	0	0.396124
Cul5	ENSMUSG00000032030	0.577119	0.325918	0	0.000928579
Srxn1	ENSMUSG00000032802	0.493588	0.494146	0	-0.486716
Rab20	ENSMUSG00000031504	0.449962	0.459608	0	-0.421913
Sc5d	ENSMUSG00000032018	0.380885	0.491763	0	0.195979
Arl8b	ENSMUSG00000030105	0.748223	0.320185	0	0.455311
Cd101	ENSMUSG00000086564	0.720506	0.385539	0	0.327863
Rgcc	ENSMUSG00000022018	0.505729	0.580214	0	0.293434
Arpc5l	ENSMUSG00000026755	0.714734	0.294929	0	-0.171931
Fus	ENSMUSG00000030795	0.596465	0.599327	0	0.327899
Zc3h7b	ENSMUSG00000022390	0.692708	0.470577	0	0.511093
Sptan1	ENSMUSG00000057738	0.696304	0.48163	0	0.314276
Rtel1	ENSMUSG00000038685	0.494383	0.488877	0	0.393813
Pcca	ENSMUSG00000041650	0.563578	0.201557	0	-0.156399
Mrpl11	ENSMUSG00000024902	0.732222	0.429766	0	0.347503
Btaf1	ENSMUSG00000040565	0.469936	0.493979	0	-0.118044
Egr1	ENSMUSG00000038418	0.786971	0.279179	0	-0.311178
Inip	ENSMUSG00000038544	0.458079	0.31724	0	0.315739
Rsl24d1	ENSMUSG00000032215	0.426337	0.580288	0	0.224844
Scamp2	ENSMUSG00000040188	0.158002	0.656664	0	0.0398217
Polr1a	ENSMUSG00000049553	0.670846	0.249422	0	-0.0810655
Brd2	ENSMUSG00000024335	0.686087	0.460158	0	0.0158951
Simc1	ENSMUSG00000043183	0.543947	0.429766	0	-0.208724
Nub1	ENSMUSG00000028954	0.466841	0.425376	0	0.0273227
Golim4	ENSMUSG00000034109	0.606245	0.298651	0	0.151924
Ccdc97	ENSMUSG00000002608	0.422351	0.486076	0	-0.0061223
Morc3	ENSMUSG00000039456	0.420539	0.422602	0	0.190065
Sytl1	ENSMUSG00000028860	0.482194	0.487184	0	0.516818
S100a4	ENSMUSG00000001020	0.295217	0.288611	0	-0.556652
Wdr37	ENSMUSG00000021147	0.289438	0.904329	0	-0.0600771
Pcmt1	ENSMUSG00000019795	0.746002	0.321003	0	0.469348
Zswim7	ENSMUSG00000014243	0.907117	0.192652	0	-0.266382
Trafd1	ENSMUSG00000042726	0.409612	0.598166	0	0.108659
Ubxn7	ENSMUSG00000053774	0.558749	0.625605	0	-0.226257
Ppp2r5d	ENSMUSG00000059409	0.541094	0.321086	0	0.344391
Bbc3	ENSMUSG00000002083	0.769864	0.277813	0	-0.316026
Ccdc50	ENSMUSG00000038127	0.695161	0.221197	0	-0.0863279
Pank4	ENSMUSG00000029056	0.470507	0.495735	0	-0.4799
Csnk1g2	ENSMUSG00000003345	0.339615	0.708548	0	-0.164764
Zfp346	ENSMUSG00000021481	0.466409	0.464165	0	-0.0248231
Galc	ENSMUSG00000021003	0.600591	0.182552	0	0.446393
Pak4	ENSMUSG00000030602	0.380516	0.705161	0	0.2193
Psmb8	ENSMUSG00000024338	0.78843	0.281735	0	0.402471
Hmg20a	ENSMUSG00000032329	0.624453	0.325259	0	-0.349082
Dnajc12	ENSMUSG00000036764	0.473336	0.498815	0	-0.330465
Ppm1k	ENSMUSG00000037826	0.725532	0.325147	0	-0.472314
Lasp1	ENSMUSG00000038366	0.603013	0.471559	0	0.236858
Ppfia1	ENSMUSG00000037519	0.816677	0.321086	0	-0.109573
Fam208b	ENSMUSG00000033799	0.731511	0.422602	0	-0.480179
Ptp4a1	ENSMUSG00000026064	0.485309	0.4983	0	-0.171734
Zfp219	ENSMUSG00000049295	0.659619	0.248021	0	-0.346137
9330136K24Rik	ENSMUSG00000097781	0.643248	0.24885	0	-0.484574
Zpr1	ENSMUSG00000032078	0.389165	0.472737	0	0.157093
Scaf4	ENSMUSG00000022983	0.550923	0.451698	0	0.151989
9530082P21Rik	ENSMUSG00000097006	0.554177	0.30582	0	0.340154
Msn	ENSMUSG00000031207	0.398266	0.453426	0	0.132165
Glrx	ENSMUSG00000021591	0.47602	0.451621	0	-0.54721
Hmces	ENSMUSG00000030060	0.475079	0.465894	0	-0.240202
Blvra	ENSMUSG00000001999	0.43608	0.492348	0	0.361908
Atf6b	ENSMUSG00000015461	0.619296	0.478675	0	0.133579
Creb1	ENSMUSG00000025958	0.595694	0.307144	0	0.179367
Prpf18	ENSMUSG00000039449	0.531904	0.329997	0	0.332667
Trpv2	ENSMUSG00000018507	0.710256	0.279179	0	0.0637096
Mtmr4	ENSMUSG00000018401	0.449948	0.490885	0	0.281183
Hivep1	ENSMUSG00000021366	0.67624	0.154276	0	0.252542
Atp5j2	ENSMUSG00000038690	0.315572	0.494522	0	0.530985
Snx18	ENSMUSG00000042364	0.660084	0.195144	0	0.204455
Slc2a1	ENSMUSG00000028645	0.592182	0.29334	0	0.261534
Pstpip1	ENSMUSG00000032322	0.506854	0.4115	0	-0.076964
Gbp3	ENSMUSG00000028268	0.443195	0.447976	0	0.315162
Trim30a	ENSMUSG00000030921	0.62305	0.277813	0	-0.429069
Top1	ENSMUSG00000070544	0.491567	0.375441	0	0.351594
Cd28	ENSMUSG00000026012	0.763871	0.0990748	0	-0.2095
Zkscan17	ENSMUSG00000020472	0.482749	0.628876	0	0.0465504
Bcl2l1	ENSMUSG00000007659	0.702461	0.174242	0	0.271149
Clcn5	ENSMUSG00000004317	0.454966	0.48163	0	0.126787
Irf4	ENSMUSG00000021356	0.689807	0.205164	0	0.354855
Mapre2	ENSMUSG00000024277	0.513551	0.337901	0	-0.0348196
Nars2	ENSMUSG00000018995	0.378005	0.449567	0	0.00379874
Rab31	ENSMUSG00000056515	0.564668	0.444331	0	-0.788792
Crem	ENSMUSG00000063889	0.480361	0.437655	0	0.0932573
Coa6	ENSMUSG00000051671	0.299822	0.448624	0	0.208143
AU022252	ENSMUSG00000078584	0.457252	0.496181	0	-0.262047
Rnf114	ENSMUSG00000006418	0.547027	0.466302	0	-0.561272
Aes	ENSMUSG00000054452	0.580172	0.460311	0	0.356452
Qtrt1	ENSMUSG00000002825	0.379617	0.48163	0	0.0869955
Tnip3	ENSMUSG00000044162	0.479114	0.300692	0	0.333836
Gnpnat1	ENSMUSG00000037722	0.404859	0.460151	0	0.112011
Cog6	ENSMUSG00000027742	0.189808	0.684958	0	0.310775
Ahi1	ENSMUSG00000019986	0.64551	0.24071	0	0.0446988
Pla2g16	ENSMUSG00000060675	0.6006	0.328901	0	-0.0568765
Rab19	ENSMUSG00000029923	0.648993	0.283584	0	-0.203686
Itgal	ENSMUSG00000030830	0.638224	0.299083	0	-0.0616614
Mdm2	ENSMUSG00000020184	0.435132	0.472737	0	0.344004
Wdr43	ENSMUSG00000041057	0.702102	0.23694	0	0.240647
Sec31a	ENSMUSG00000035325	0.399381	0.453154	0	0.20411
Cd47	ENSMUSG00000055447	0.571	0.322229	0	0.524646
Mbd4	ENSMUSG00000030322	0.404622	0.497589	0	0.357527
Tcf12	ENSMUSG00000032228	0.618947	0.4316	0	-0.477615
Snx14	ENSMUSG00000032422	0.574815	0.309443	0	-0.0931495
Caprin1	ENSMUSG00000027184	0.727767	0.179974	0	0.410987
Cacul1	ENSMUSG00000033417	0.458311	0.48163	0	-0.0923316
Ttc13	ENSMUSG00000037300	0.387595	0.55997	0	-0.158433
Shisa5	ENSMUSG00000025647	0.539166	0.346789	0	-0.291259
Mrpl30	ENSMUSG00000026087	0.454186	0.418769	0	-0.0888566
Cd2	ENSMUSG00000027863	0.649718	0.30656	0	-0.0769535
Pvt1	ENSMUSG00000097039	0.596676	0.212582	0	0.143972
Baz1a	ENSMUSG00000035021	0.668114	0.225455	0	-0.332447
Mier1	ENSMUSG00000028522	0.472902	0.385304	0	0.182012
Sap30l	ENSMUSG00000020519	0.479525	0.453154	0	-0.170918
Rftn1	ENSMUSG00000039316	0.393236	0.367188	0	-0.235061
Samhd1	ENSMUSG00000027639	0.766517	0.24844	0	-0.31869
Rbm27	ENSMUSG00000024491	0.616945	0.297224	0	0.149095
Ifngr1	ENSMUSG00000020009	0.656357	0.244439	0	0.11573
Prr7	ENSMUSG00000034686	0.808582	0.240139	0	-0.0264409
Ints6l	ENSMUSG00000035967	0.552858	0.29334	0	-0.568451
Hnrnpd	ENSMUSG00000000568	0.509222	0.288611	0	0.488128
Mettl8	ENSMUSG00000041975	0.453219	0.302103	0	-0.283992
Usp45	ENSMUSG00000040455	0.429529	0.445837	0	-0.286612
Ftx	ENSMUSG00000086370	0.345792	0.364469	0	-0.194765
Rnf125	ENSMUSG00000033107	0.486132	0.388647	0	-0.119975
Faim	ENSMUSG00000032463	0.405096	0.484431	0	0.238806
Zmat3	ENSMUSG00000027663	0.483233	0.479762	0	-0.48115
Hace1	ENSMUSG00000038822	0.726387	0.319051	0	-0.210588
Fbxo31	ENSMUSG00000052934	0.485496	0.369682	0	-0.0184124
Acap3	ENSMUSG00000029033	0.549959	0.331689	0	0.358693
Ntpcr	ENSMUSG00000031851	0.482768	0.332729	0	-0.279838
Itpr1	ENSMUSG00000030102	0.476274	0.229057	0	0.163618
Cyb5r4	ENSMUSG00000032872	0.204676	0.568245	0	0.304258
Tmem8	ENSMUSG00000024180	0.643924	0.448624	0	-0.310979
Tada2b	ENSMUSG00000029196	0.478508	0.472737	0	0.156534
Rrp12	ENSMUSG00000035049	0.544346	0.328093	0	0.282963
Zfp790	ENSMUSG00000011427	0.48464	0.475859	0	-0.446571
Hccs	ENSMUSG00000031352	0.389039	0.418769	0	0.325609
Pnpla8	ENSMUSG00000036257	0.483623	0.48163	0	-0.408179
Nkiras2	ENSMUSG00000017837	0.407479	0.458729	0	0.0322555
Coro1a	ENSMUSG00000030707	0.654308	0.356368	0	0.193524
Fbxo34	ENSMUSG00000037536	0.447222	0.576768	0	0.0536657
Il18rap	ENSMUSG00000026068	0.295278	0.299794	0	0.401116
Kif21b	ENSMUSG00000041642	0.490109	0.304612	0	0.176129
Cxcr4	ENSMUSG00000045382	0.514677	0.490787	0	0.111617
Lpcat3	ENSMUSG00000004270	0.624976	0.442763	0	0.102902
Zfp236	ENSMUSG00000041258	0.344911	0.45091	0	-0.326312
Itm2c	ENSMUSG00000026223	0.399771	0.453851	0	-0.0280043
Snapc1	ENSMUSG00000021113	0.485463	0.418769	0	0.0754627
Lipe	ENSMUSG00000003123	0.552914	0.569323	0	-0.204006
Rragb	ENSMUSG00000041658	0.378599	0.497477	0	0.361735
Jpt1	ENSMUSG00000020737	0.591829	0.283584	0	0.410892
Nkap	ENSMUSG00000016409	0.788625	0.32839	0	0.296035
Runx2	ENSMUSG00000039153	0.579744	0.156688	0	0.449233
Kars	ENSMUSG00000031948	0.304756	0.496111	0	0.55937
B4galnt1	ENSMUSG00000006731	0.530159	0.369671	0	0.461603
Hacd3	ENSMUSG00000033629	0.503565	0.373155	0	-0.117392
Plk3	ENSMUSG00000028680	0.397221	0.492195	0	-0.140715
Rrp1b	ENSMUSG00000058392	0.57658	0.30582	0	0.0285963
9030624J02Rik	ENSMUSG00000030982	0.236259	0.290144	0	0.0749896
B3galt5	ENSMUSG00000074892	0.494684	0.192111	0	0.308952
Cnot10	ENSMUSG00000056167	0.600591	0.235288	0	0.173596
Zfp950	ENSMUSG00000074733	0.446617	0.418769	0	-0.52746
Mapk14	ENSMUSG00000053436	0.801024	0.262302	0	-0.104894
Carmil2	ENSMUSG00000050357	0.422588	0.432916	0	-0.286139
Eif4e	ENSMUSG00000028156	0.32314	0.607922	0	0.47826
Ier5l	ENSMUSG00000089762	0.704614	0.365322	0	-0.355034
Otud7b	ENSMUSG00000038495	0.627582	0.420685	0	-0.257799
Bahd1	ENSMUSG00000040007	0.475316	0.472737	0	-0.380284
Rhog	ENSMUSG00000073982	0.695941	0.214883	0	-0.259219
Zcchc2	ENSMUSG00000038866	0.543584	0.456694	0	-0.335311
Arid3b	ENSMUSG00000004661	0.456221	0.45882	0	-0.17596
Ust	ENSMUSG00000047712	0.576322	0.230972	0	0.292993
Ccdc117	ENSMUSG00000020482	0.465225	0.498118	0	-0.285474
Setd7	ENSMUSG00000037111	0.696564	0.26245	0	-0.51243
Eef2k	ENSMUSG00000035064	0.724491	0.312919	0	-0.503287
Pim1	ENSMUSG00000024014	0.754216	0.302103	0	0.180007
Pik3cd	ENSMUSG00000039936	0.499192	0.343902	0	0.126849
Snx12	ENSMUSG00000046032	0.463794	0.310596	0	0.107112
Cyb5a	ENSMUSG00000024646	0.417305	0.448624	0	-0.27122
Sec23ip	ENSMUSG00000055319	0.442046	0.470577	0	0.400357
Atxn7l1os2	ENSMUSG00000085664	0.435536	0.461907	0	-0.484013
Crtc2	ENSMUSG00000027936	0.376997	0.429766	0	-0.049826
Kdelc2	ENSMUSG00000034487	0.304714	0.464165	0	0.320187
Myo9b	ENSMUSG00000004677	0.196036	0.547861	0	0.0428283
Snap47	ENSMUSG00000009894	0.406099	0.181262	0	0.140854
Snw1	ENSMUSG00000021039	0.391102	0.486452	0	0.0514136
Twf2	ENSMUSG00000023277	0.369059	0.451489	0	0.32748
Mfhas1	ENSMUSG00000070056	0.604814	0.356112	0	-0.470749
St8sia4	ENSMUSG00000040710	0.663253	0.192407	0	-0.18329
Clic1	ENSMUSG00000007041	0.454241	0.445837	0	0.430432
Idnk	ENSMUSG00000050002	0.207807	0.606185	0	-0.189986
Il15ra	ENSMUSG00000023206	0.391548	0.453154	0	0.496839
Snapin	ENSMUSG00000001018	0.414197	0.425376	0	-0.253422
Ptprj	ENSMUSG00000025314	0.433428	0.259059	0	0.123159
Apeh	ENSMUSG00000032590	0.402015	0.48163	0	0.0373611
C3	ENSMUSG00000024164	0.270064	0.592247	0	-0.00648754
Usp37	ENSMUSG00000033364	0.461489	0.435216	0	0.435933
Ssb	ENSMUSG00000068882	0.435536	0.491693	0	0.420386
Cd200	ENSMUSG00000022661	0.679473	0.41672	0	-0.622688
Etv6	ENSMUSG00000030199	0.649997	0.0758295	0	-0.124841
Ddx19a	ENSMUSG00000015023	0.384704	0.425376	0	0.452137
Zc3h12a	ENSMUSG00000042677	0.553181	0.242773	0	0.12911
Kcmf1	ENSMUSG00000055239	0.685334	0.181262	0	0.282995
Osm	ENSMUSG00000058755	0.310856	0.650666	0	0.220303
Gm26686	ENSMUSG00000097283	0.39506	0.493714	0	-0.459886
Stag2	ENSMUSG00000025862	0.54128	0.302103	0	0.072299
Leprotl1	ENSMUSG00000031513	0.900259	0.192652	0	-0.271936
Nsmaf	ENSMUSG00000028245	0.648343	0.271557	0	-0.194224
Itm2b	ENSMUSG00000022108	0.496455	0.313453	0	-0.262126
Dars	ENSMUSG00000026356	0.675341	0.244244	0	0.332586
Fam98b	ENSMUSG00000027349	0.416609	0.442394	0	0.477458
Acsl4	ENSMUSG00000031278	0.666843	0.148612	0	0.122607
Fech	ENSMUSG00000024588	0.242383	0.583484	0	-0.121735
Eif3h	ENSMUSG00000022312	0.53504	0.436456	0	-0.00622471
Glb1	ENSMUSG00000045594	0.59178	0.231627	0	-0.0108678
Nipal1	ENSMUSG00000067219	0.607867	0.277813	0	-0.311413
Ndufv2	ENSMUSG00000024099	0.465015	0.422602	0	0.223176
Got2	ENSMUSG00000031672	0.395674	0.418769	0	0.548801
Atxn1	ENSMUSG00000046876	0.530779	0.160797	0	0.225777
Ap2a1	ENSMUSG00000060279	0.243126	0.644291	0	0.33483
Faah	ENSMUSG00000034171	0.414009	0.458217	0	-0.237004
Ccnt2	ENSMUSG00000026349	0.480027	0.429557	0	-0.403454
Mesd	ENSMUSG00000038503	0.388607	0.469378	0	-0.0159606
Kif3c	ENSMUSG00000020668	0.307074	0.584191	0	-0.427103
Kdm4c	ENSMUSG00000028397	0.47257	0.460151	0	-0.302574
5730508B09Rik	ENSMUSG00000050549	0.537419	0.13959	0	-0.433773
Agpat3	ENSMUSG00000001211	0.614881	0.239937	0	0.0197064
Rngtt	ENSMUSG00000028274	0.352654	0.462214	0	0.242145
Nfe2l1	ENSMUSG00000038615	0.731995	0.141228	0	0.133161
Cttn	ENSMUSG00000031078	0.499261	0.327925	0	0.0937601
BC065403	ENSMUSG00000097211	0.413514	0.292541	0	-0.397365
Zzef1	ENSMUSG00000055670	0.190377	0.744041	0	-0.240496
Smap2	ENSMUSG00000032870	0.606714	0.205292	0	0.229721
Cpm	ENSMUSG00000020183	0.598198	0.12369	0	0.400412
BC025920	ENSMUSG00000074862	0.570002	0.330453	0	-0.363611
Rfx7	ENSMUSG00000037674	0.568143	0.331856	0	-0.577603
Erp44	ENSMUSG00000028343	0.624108	0.116473	0	0.398351
Sgms1	ENSMUSG00000040451	0.535961	0.258482	0	-0.223443
Hdac7	ENSMUSG00000022475	0.607654	0.226751	0	-0.00431443
Add3	ENSMUSG00000025026	0.560118	0.226655	0	0.127243
2700038G22Rik	ENSMUSG00000097180	0.389165	0.429766	0	0.926357
Ugp2	ENSMUSG00000001891	0.526468	0.333222	0	0.365016
Mtf2	ENSMUSG00000029267	0.427522	0.418769	0	0.0461228
Wdr35	ENSMUSG00000066643	0.488153	0.470577	0	-0.274133
Tep1	ENSMUSG00000006281	0.41626	0.471998	0	-0.412042
Ethe1	ENSMUSG00000064254	0.501491	0.292541	0	-0.0474202
Adamts10	ENSMUSG00000024299	0.49673	0.189853	0	-0.200598
Tnpo1	ENSMUSG00000009470	0.743436	0.137608	0	0.20438
Rab8b	ENSMUSG00000036943	0.446711	0.319612	0	0.352147
Hmg20b	ENSMUSG00000020232	0.407242	0.478675	0	-0.101571
Slc16a3	ENSMUSG00000025161	0.370111	0.453154	0	-0.2214
Zfp809	ENSMUSG00000057982	0.437042	0.445837	0	-0.0635039
Tet2	ENSMUSG00000040943	0.391935	0.216249	0	-0.269857
Wnk1	ENSMUSG00000045962	0.535858	0.309443	0	0.130077
Plekhb2	ENSMUSG00000026123	0.526615	0.217608	0	0.0534936
Lrrc8d	ENSMUSG00000046079	0.469389	0.270708	0	-0.13565
Cyb5r3	ENSMUSG00000018042	0.505664	0.302103	0	-0.0543547
Cab39	ENSMUSG00000036707	0.61216	0.217608	0	0.301894
Zc3h13	ENSMUSG00000022000	0.401918	0.44146	0	0.121669
Mapkapk3	ENSMUSG00000032577	0.568255	0.171904	0	0.3764
Phlpp2	ENSMUSG00000031732	0.651809	0.313718	0	0.515855
Eif3d	ENSMUSG00000016554	0.496766	0.425376	0	0.26971
Elf2	ENSMUSG00000037174	0.49057	0.405687	0	-0.131284
C130036L24Rik	ENSMUSG00000073627	0.395674	0.48163	0	-0.151002
Nufip2	ENSMUSG00000037857	0.476696	0.497129	0	-0.505873
Gbe1	ENSMUSG00000022707	0.398975	0.544656	0	0.172724
Tk2	ENSMUSG00000035824	0.610812	0.32445	0	-0.550354
Orai3	ENSMUSG00000043964	0.378418	0.460151	0	-0.108283
Tgif1	ENSMUSG00000047407	0.622239	0.261832	0	-0.0513424
Washc2	ENSMUSG00000024104	0.344214	0.48163	0	-0.437166
Slamf1	ENSMUSG00000015316	0.609846	0.342494	0	-0.419799
Pkn1	ENSMUSG00000057672	0.429255	0.290144	0	-0.199336
Bod1	ENSMUSG00000044502	0.359574	0.453154	0	0.237212
Pcnx	ENSMUSG00000021140	0.564129	0.119648	0	-0.243862
Rsf1	ENSMUSG00000035623	0.589719	0.214883	0	-0.319343
Glg1	ENSMUSG00000003316	0.414699	0.499498	0	-0.0418643
G430095P16Rik	ENSMUSG00000074203	0.391227	0.492947	0	-0.431312
Scaf8	ENSMUSG00000046201	0.549148	0.343813	0	-0.118161
Abhd12	ENSMUSG00000032046	0.5922	0.330378	0	0.0122614
Intu	ENSMUSG00000060798	0.128682	0.555136	0	0.248932
Vcpkmt	ENSMUSG00000049882	0.466719	0.189095	0	0.429767
Psmb10	ENSMUSG00000031897	0.366446	0.470577	0	0.322477
Rnpepl1	ENSMUSG00000026269	0.547543	0.283584	0	-0.253243
Ucp2	ENSMUSG00000033685	0.604336	0.292541	0	-0.286277
Ostf1	ENSMUSG00000024725	0.430923	0.228685	0	0.25689
Rps6ka5	ENSMUSG00000021180	0.624517	0.140962	0	0.151752
Rad54l2	ENSMUSG00000040661	0.444917	0.23694	0	0.474243
Nfkbia	ENSMUSG00000021025	0.653577	0.229365	0	-0.124872
9430091E24Rik	ENSMUSG00000084808	0.389443	0.445837	0	-0.331914
Plxnc1	ENSMUSG00000074785	0.37184	0.253981	0	-0.0467269
Polr3g	ENSMUSG00000035834	0.433313	0.217608	0	0.344895
Nanp	ENSMUSG00000053916	0.353246	0.496348	0	0.218886
Foxn3	ENSMUSG00000033713	0.560488	0.269966	0	-0.379659
Magi3	ENSMUSG00000052539	0.386809	0.429766	0	0.0872752
Pdlim5	ENSMUSG00000028273	0.634293	0.122219	0	-0.146627
D10Wsu102e	ENSMUSG00000020255	0.395674	0.492613	0	0.133307
Srek1	ENSMUSG00000032621	0.358069	0.440011	0	0.149856
Glce	ENSMUSG00000032252	0.412274	0.425376	0	0.0422607
Clk3	ENSMUSG00000032316	0.4725	0.442394	0	0.0141351
Parp14	ENSMUSG00000034422	0.572129	0.313718	0	-0.490329
Papd5	ENSMUSG00000036779	0.445739	0.422602	0	0.0574426
Zfp639	ENSMUSG00000027667	0.376565	0.41672	0	0.20167
Mon2	ENSMUSG00000034602	0.411814	0.486313	0	-0.0555213
Fgfr1op	ENSMUSG00000069135	0.656287	0.388331	0	-0.514756
Pbrm1	ENSMUSG00000042323	0.415187	0.432916	0	0.257283
Taok3	ENSMUSG00000061288	0.367837	0.222361	0	0.0517285
Drg2	ENSMUSG00000020537	0.440164	0.442394	0	0.497652
Ythdf2	ENSMUSG00000040025	0.471288	0.498592	0	0.254606
Arl4a	ENSMUSG00000047446	0.457216	0.268288	0	-0.301189
Mrpl45	ENSMUSG00000018882	0.481644	0.432916	0	0.35679
Dennd4b	ENSMUSG00000042404	0.487205	0.429766	0	-0.441292
Gfpt1	ENSMUSG00000029992	0.4788	0.435216	0	0.381072
Prkdc	ENSMUSG00000022672	0.413403	0.460151	0	-0.376367
Asb6	ENSMUSG00000039483	0.57987	0.283584	0	-0.0770088
Sphk2	ENSMUSG00000057342	0.375449	0.425376	0	-0.200213
Rps15a	ENSMUSG00000008683	0.467421	0.19971	0	-0.27286
Ahcyl2	ENSMUSG00000029772	0.747297	0.110089	0	-0.0682633
Lck	ENSMUSG00000000409	0.544365	0.330841	0	-0.130995
Ammecr1l	ENSMUSG00000041915	0.33826	0.521339	0	-0.374383
Susd6	ENSMUSG00000021133	0.556033	0.412461	0	-0.432345
Rabgef1	ENSMUSG00000025340	0.531263	0.171906	0	0.0613569
Trap1	ENSMUSG00000005981	0.544746	0.316422	0	0.465692
Osbpl8	ENSMUSG00000020189	0.554649	0.136408	0	0.154179
Gm20431	ENSMUSG00000089739	0.526615	0.224312	0	0.235862
Gmppa	ENSMUSG00000033021	0.326834	0.445837	0	0.44419
Ip6k1	ENSMUSG00000032594	0.423606	0.482675	0	-0.582893
Med15	ENSMUSG00000012114	0.576729	0.286511	0	-0.0181411
Mtdh	ENSMUSG00000022255	0.393708	0.422602	0	0.260332
Tpst2	ENSMUSG00000029344	0.372471	0.304051	0	0.486678
N4bp1	ENSMUSG00000031652	0.456323	0.155642	0	0.227275
Pld3	ENSMUSG00000003363	0.297717	0.560444	0	-0.42224
Ric8b	ENSMUSG00000035620	0.168692	0.434289	0	-0.193199
E330020D12Rik	ENSMUSG00000073538	0.435992	0.283584	0	0.0147336
Irak2	ENSMUSG00000060477	0.540532	0.0791055	0	0.197888
Nemp1	ENSMUSG00000040195	0.419764	0.372871	0	0.185756
Twsg1	ENSMUSG00000024098	0.640549	0.171906	0	-0.268351
Dnaja1	ENSMUSG00000028410	0.588855	0.325342	0	-0.165533
Arap2	ENSMUSG00000037999	0.418067	0.271222	0	-0.116756
Apaf1	ENSMUSG00000019979	0.455342	0.317597	0	0.423199
Irgq	ENSMUSG00000041037	0.421445	0.41672	0	-0.392028
Emp1	ENSMUSG00000030208	0.487135	0.225455	0	-0.0216031
Rpap2	ENSMUSG00000033773	0.160464	0.311581	0	-0.0710271
Kif3a	ENSMUSG00000018395	0.57777	0.279179	0	-0.237577
Pnpla6	ENSMUSG00000004565	0.406638	0.325147	0	-0.50595
Trib2	ENSMUSG00000020601	0.619913	0.274401	0	-0.17228
Agpat4	ENSMUSG00000023827	0.5185	0.072536	0	0.387594
Soat1	ENSMUSG00000026600	0.410625	0.294929	0	0.0538679
Phlpp1	ENSMUSG00000044340	0.367511	0.23289	0	0.0959552
Siah2	ENSMUSG00000036432	0.43247	0.429766	0	-0.17178
Cytip	ENSMUSG00000026832	0.571152	0.138377	0	0.0729762
Smad2	ENSMUSG00000024563	0.517195	0.279179	0	0.238441
Tmc6	ENSMUSG00000025572	0.427564	0.457803	0	-0.380539
Nin	ENSMUSG00000021068	0.319176	0.560433	0	-0.125903
Bcl7c	ENSMUSG00000030814	0.41626	0.478675	0	0.349141
Cd200r1	ENSMUSG00000022667	0.529005	0.356368	0	-0.160772
Fkbp1a	ENSMUSG00000032966	0.511908	0.294929	0	0.12278
Sltm	ENSMUSG00000032212	0.48832	0.495484	0	-0.0157557
Rexo5	ENSMUSG00000030924	0.553155	0.149541	0	0.130008
Plec	ENSMUSG00000022565	0.649834	0.184789	0	-0.0807053
Hibch	ENSMUSG00000041426	0.583259	0.211301	0	-0.0607535
Zc3hav1l	ENSMUSG00000047749	0.402308	0.465894	0	0.100997
Ube3a	ENSMUSG00000025326	0.391882	0.45091	0	0.0848585
Rufy2	ENSMUSG00000020070	0.454325	0.312017	0	-0.47695
Rtn3	ENSMUSG00000024758	0.687404	0.248293	0	0.433399
Tmem70	ENSMUSG00000025940	0.350166	0.48163	0	0.376799
Trpm2	ENSMUSG00000009292	0.32343	0.356658	0	0.485301
2700060E02Rik	ENSMUSG00000021807	0.486299	0.422602	0	0.10299
Tubgcp3	ENSMUSG00000000759	0.387896	0.493365	0	0.131172
Faap100	ENSMUSG00000025384	0.480556	0.453154	0	0.215747
Ncoa5	ENSMUSG00000039804	0.298985	0.471998	0	0.155488
Cdk8	ENSMUSG00000029635	0.372146	0.458729	0	0.0956637
Stag1	ENSMUSG00000037286	0.465284	0.257189	0	0.499651
Stxbp5	ENSMUSG00000019790	0.564512	0.247937	0	0.234622
Acoxl	ENSMUSG00000027380	0.492788	0.194657	0	0.459394
Nmi	ENSMUSG00000026946	0.509009	0.306767	0	0.19699
Sh2b1	ENSMUSG00000030733	0.587231	0.212688	0	-0.0187374
Preb	ENSMUSG00000045302	0.43608	0.493519	0	0.271204
Zcchc6	ENSMUSG00000035248	0.382558	0.469378	0	-0.33168
Tapbp	ENSMUSG00000024308	0.515993	0.376461	0	0.266856
Cnpy3	ENSMUSG00000023973	0.376369	0.449934	0	0.283756
Dhx9	ENSMUSG00000042699	0.288666	0.574276	0	0.362682
Bmt2	ENSMUSG00000042742	0.643994	0.243303	0	-0.301271
Ncbp3	ENSMUSG00000020783	0.285628	0.610087	0	0.396551
Map4k1	ENSMUSG00000037337	0.560477	0.326727	0	0.24374
Tspyl1	ENSMUSG00000047514	0.388356	0.466841	0	-0.126129
Lcp1	ENSMUSG00000021998	0.462108	0.181089	0	0.484202
Slc35e1	ENSMUSG00000019731	0.482424	0.323855	0	0.227978
Fnip2	ENSMUSG00000061175	0.524508	0.29334	0	0.147894
Papd7	ENSMUSG00000034575	0.330155	0.599206	0	0.0716317
Trps1	ENSMUSG00000038679	0.716953	0.180153	0	0.2288
Eif4g1	ENSMUSG00000045983	0.367853	0.48057	0	0.476469
Mcub	ENSMUSG00000027994	0.360898	0.442394	0	-0.145226
B4galt1	ENSMUSG00000028413	0.596427	0.220734	0	0.175844
Zfand2a	ENSMUSG00000053581	0.330485	0.48163	0	-0.0110709
Timm10	ENSMUSG00000027076	0.525976	0.32445	0	0.176651
Dock8	ENSMUSG00000052085	0.662511	0.220169	0	-0.060702
1600014C10Rik	ENSMUSG00000054676	0.301397	0.610041	0	-0.268147
Lrrc28	ENSMUSG00000030556	0.373944	0.429766	0	-0.0328371
Exoc2	ENSMUSG00000021357	0.517341	0.199965	0	0.0625627
Mr1	ENSMUSG00000026471	0.385359	0.470019	0	-0.344344
Mkln1	ENSMUSG00000025609	0.589487	0.162225	0	0.021971
Gnai2	ENSMUSG00000032562	0.613107	0.247749	0	0.41535
Rfx1	ENSMUSG00000031706	0.420065	0.470577	0	-0.310566
Ikbkg	ENSMUSG00000004221	0.374843	0.446652	0	-0.287333
Ndufab1	ENSMUSG00000030869	0.434651	0.24655	0	0.394417
Fam219a	ENSMUSG00000028439	0.408734	0.463454	0	0.089531
Smg9	ENSMUSG00000002210	0.228417	0.617029	0	-0.28842
E4f1	ENSMUSG00000024137	0.517325	0.33128	0	-0.429239
Tmem126b	ENSMUSG00000030614	0.431327	0.442394	0	-0.307874
Vapa	ENSMUSG00000024091	0.434867	0.453154	0	0.225793
Cracr2a	ENSMUSG00000061414	0.294975	0.361184	0	0.11593
Nedd9	ENSMUSG00000021365	0.446901	0.305137	0	-0.182504
Slc30a7	ENSMUSG00000054414	0.185287	0.534792	0	0.0925175
Smad3	ENSMUSG00000032402	0.63156	0.154266	0	-0.00121145
Tex264	ENSMUSG00000040813	0.249296	0.567168	0	-0.0983285
Atat1	ENSMUSG00000024426	0.308519	0.464165	0	-0.479142
Tigar	ENSMUSG00000038028	0.403214	0.466841	0	0.555859
Notch2	ENSMUSG00000027878	0.330193	0.526307	0	0.0690998
Ppp1r8	ENSMUSG00000028882	0.599448	0.321086	0	0.583178
Chd2	ENSMUSG00000078671	0.462552	0.418944	0	-0.512667
Efcab2	ENSMUSG00000026495	0.394185	0.378318	0	0.195528
Pnkp	ENSMUSG00000002963	0.408608	0.449934	0	-0.0121031
Vmp1	ENSMUSG00000018171	0.560315	0.166246	0	0.38329
Ube2d1	ENSMUSG00000019927	0.435927	0.467455	0	-0.416548
Polg2	ENSMUSG00000020718	0.478354	0.442394	0	0.0678955
Wwp2	ENSMUSG00000031930	0.534893	0.185666	0	0.209088
Atp2b4	ENSMUSG00000026463	0.385516	0.447941	0	0.553747
Mettl21a	ENSMUSG00000025956	0.515652	0.327089	0	-0.197429
Cops4	ENSMUSG00000035297	0.460311	0.230076	0	0.224251
Kansl1	ENSMUSG00000018412	0.538	0.153384	0	-0.255576
Slc12a8	ENSMUSG00000035506	0.475901	0.183492	0	0.407623
Ap1ar	ENSMUSG00000074238	0.436979	0.240815	0	0.35042
Sap130	ENSMUSG00000024260	0.253264	0.325147	0	0.31722
Sod1	ENSMUSG00000022982	0.380119	0.48163	0	0.367607
Poldip2	ENSMUSG00000001100	0.457851	0.475859	0	0.17634
Cd274	ENSMUSG00000016496	0.338068	0.472737	0	-0.124558
Acbd6	ENSMUSG00000033701	0.449521	0.13959	0	-0.0503127
Ccdc88b	ENSMUSG00000047810	0.345023	0.460151	0	-0.0164916
Mynn	ENSMUSG00000037730	0.613421	0.222918	0	-0.281929
Tnfaip8l2	ENSMUSG00000013707	0.554976	0.310596	0	-0.313279
Sfpq	ENSMUSG00000028820	0.550934	0.288611	0	0.136339
Atrnl1	ENSMUSG00000054843	0.387162	0.190212	0	0.101245
Tmcc2	ENSMUSG00000042066	0.188185	0.652308	0	-1.66467
Zfp655	ENSMUSG00000007812	0.440861	0.20836	0	-0.0973826
Serbp1	ENSMUSG00000036371	0.381345	0.432916	0	0.421671
Tmem106c	ENSMUSG00000052369	0.233444	0.596419	0	0.228404
Mapkapk5	ENSMUSG00000029454	0.268977	0.604206	0	0.194507
Tardbp	ENSMUSG00000041459	0.309272	0.445837	0	0.431692
Triobp	ENSMUSG00000033088	0.441647	0.358899	0	0.369747
Zbtb38	ENSMUSG00000040433	0.419445	0.222124	0	-0.175942
Rab27a	ENSMUSG00000032202	0.516802	0.161356	0	-0.248732
Ptpra	ENSMUSG00000027303	0.413677	0.315827	0	0.0999884
Ell2	ENSMUSG00000001542	0.272563	0.281735	0	0.256146
Lpin1	ENSMUSG00000020593	0.364321	0.266306	0	0.416639
Trmu	ENSMUSG00000022386	0.402015	0.453154	0	-0.207878
Dcaf12	ENSMUSG00000028436	0.332413	0.645983	0	0.174766
Gpr19	ENSMUSG00000032641	0.525654	0.379138	0	-0.353054
Galnt1	ENSMUSG00000000420	0.315711	0.418769	0	0.322903
Ngdn	ENSMUSG00000022204	0.668938	0.17015	0	0.31924
Wbp1l	ENSMUSG00000047731	0.478366	0.408714	0	-0.121742
Golga2	ENSMUSG00000002546	0.382321	0.480891	0	0.167293
Atg12	ENSMUSG00000032905	0.301285	0.48163	0	-0.294196
Zgpat	ENSMUSG00000027582	0.470633	0.297224	0	-0.0452457
Irf1	ENSMUSG00000018899	0.393694	0.418769	0	-0.137226
Nfkbie	ENSMUSG00000023947	0.518691	0.290144	0	0.0252378
Pnrc1	ENSMUSG00000040128	0.480225	0.359745	0	-0.46411
Dnaja2	ENSMUSG00000031701	0.318833	0.477936	0	0.335647
Usp47	ENSMUSG00000059263	0.429799	0.299887	0	0.16623
Sema4d	ENSMUSG00000021451	0.505586	0.189873	0	0.400766
Snx32	ENSMUSG00000056185	0.472166	0.448624	0	-0.371001
Klhdc10	ENSMUSG00000029775	0.44061	0.422602	0	0.196979
Rtn4ip1	ENSMUSG00000019864	0.276132	0.321086	0	0.439388
Nacc1	ENSMUSG00000001910	0.36533	0.440011	0	0.106386
Emc4	ENSMUSG00000027131	0.429836	0.429766	0	0.390863
Cradd	ENSMUSG00000045867	0.47801	0.105372	0	0.0606732
Fam13b	ENSMUSG00000036501	0.530297	0.297224	0	-0.266478
Tspan32	ENSMUSG00000000244	0.428979	0.211301	0	-0.389334
Tnfrsf25	ENSMUSG00000024793	0.520819	0.321086	0	-0.375479
Keap1	ENSMUSG00000003308	0.602068	0.234689	0	0.450761
Zfp61	ENSMUSG00000050605	0.389165	0.469378	0	-0.0872665
Zfp444	ENSMUSG00000044876	0.573412	0.286511	0	-0.309944
Il3ra	ENSMUSG00000068758	0.305346	0.478168	0	0.0917067
Irf2	ENSMUSG00000031627	0.347559	0.313024	0	0.0110875
Taldo1	ENSMUSG00000025503	0.300212	0.465894	0	0.359633
Cacna1i	ENSMUSG00000022416	0.473309	0.238968	0	-0.464938
Dnaja3	ENSMUSG00000004069	0.379979	0.445837	0	0.384193
Dzip3	ENSMUSG00000064061	0.441251	0.464165	0	0.430932
Naa25	ENSMUSG00000042719	0.323251	0.41672	0	0.300215
Ppp3cc	ENSMUSG00000022092	0.476586	0.19556	0	0.105358
Svil	ENSMUSG00000024236	0.64241	0.148612	0	0.220647
Cic	ENSMUSG00000005442	0.580057	0.171906	0	-0.113654
Spata2	ENSMUSG00000047030	0.489769	0.48163	0	0.0674731
Supt16	ENSMUSG00000035726	0.579287	0.20836	0	0.571352
Baz2a	ENSMUSG00000040054	0.323251	0.37542	0	-0.514349
Necap2	ENSMUSG00000028923	0.507067	0.306405	0	0.21101
Irgm1	ENSMUSG00000046879	0.25332	0.618413	0	-0.533861
Bcas3	ENSMUSG00000059439	0.347708	0.182343	0	-0.470564
Creld1	ENSMUSG00000030284	0.48458	0.328158	0	0.0487082
Pigx	ENSMUSG00000023791	0.503526	0.294929	0	-0.0540187
Zbtb41	ENSMUSG00000033964	0.351588	0.422602	0	0.0684083
Sipa1l1	ENSMUSG00000042700	0.483226	0.221739	0	-0.290795
1810013L24Rik	ENSMUSG00000022507	0.308682	0.45032	0	-0.428634
Zbtb17	ENSMUSG00000006215	0.29938	0.311228	0	0.159338
Spata5	ENSMUSG00000027722	0.389621	0.233473	0	0.268433
Gm16754	ENSMUSG00000097439	0.444136	0.458729	0	-1.66498
Rabep2	ENSMUSG00000030727	0.342625	0.440011	0	-0.0894741
Erg28	ENSMUSG00000021252	0.333022	0.466841	0	0.287285
Tbk1	ENSMUSG00000020115	0.206897	0.477762	0	0.0781386
Lars2	ENSMUSG00000035202	0.512475	0.290144	0	0.00814938
Dock10	ENSMUSG00000038608	0.379669	0.223473	0	0.279793
Mtor	ENSMUSG00000028991	0.192352	0.705252	0	-0.0849457
Nod2	ENSMUSG00000055994	0.302321	0.474925	0	0.0712586
Ppp4r3b	ENSMUSG00000020463	0.336088	0.469378	0	-0.0997064
Psme4	ENSMUSG00000040850	0.489672	0.277813	0	0.0776154
Rap1b	ENSMUSG00000052681	0.487146	0.286224	0	0.100412
Vps50	ENSMUSG00000001376	0.155946	0.242522	0	0.45817
Fyco1	ENSMUSG00000025241	0.358841	0.128831	0	-0.121902
Sord	ENSMUSG00000027227	0.379617	0.45091	0	0.0621687
Abcb1b	ENSMUSG00000028970	0.385429	0.303334	0	0.287217
H2afv	ENSMUSG00000041126	0.357539	0.442394	0	0.214315
Cnot2	ENSMUSG00000020166	0.505732	0.201402	0	-0.0203571
Hmgcr	ENSMUSG00000021670	0.398141	0.476751	0	0.012735
Gna15	ENSMUSG00000034792	0.280467	0.376227	0	0.486353
Tial1	ENSMUSG00000030846	0.403995	0.440011	0	-0.012845
Cdk11b	ENSMUSG00000029062	0.35956	0.461907	0	0.046874
Bola3	ENSMUSG00000045160	0.360494	0.41672	0	0.568742
Nln	ENSMUSG00000021710	0.278157	0.484896	0	0.490141
Zdhhc3	ENSMUSG00000025786	0.380885	0.418769	0	0.311523
Lrrc27	ENSMUSG00000015980	0.154824	0.45091	0	0.612506
Sdhaf2	ENSMUSG00000024668	0.480319	0.438812	0	0.227235
Il10rb	ENSMUSG00000022969	0.411549	0.478591	0	-0.186074
Plxdc1	ENSMUSG00000017417	0.431947	0.287812	0	-0.143079
Lancl1	ENSMUSG00000026000	0.504799	0.31592	0	-0.382798
Rassf5	ENSMUSG00000026430	0.483332	0.259483	0	-0.129696
Krr1	ENSMUSG00000063334	0.372146	0.418769	0	0.22336
Nfkbil1	ENSMUSG00000042419	0.363951	0.41672	0	0.150496
Lmna	ENSMUSG00000028063	0.581874	0.284336	0	-0.679788
Rinl	ENSMUSG00000051735	0.679824	0.146271	0	-0.26165
Fermt3	ENSMUSG00000024965	0.231086	0.690596	0	0.0734125
Ewsr1	ENSMUSG00000009079	0.321848	0.620522	0	0.267189
Traf3ip2	ENSMUSG00000019842	0.368174	0.453154	0	-0.107382
Nudt3	ENSMUSG00000024213	0.345713	0.484152	0	0.151719
Sec24c	ENSMUSG00000039367	0.41817	0.432916	0	0.175524
Swi5	ENSMUSG00000044627	0.382321	0.498397	0	0.482432
Mycbp2	ENSMUSG00000033004	0.291417	0.281735	0	-0.538355
Dhx8	ENSMUSG00000034931	0.38076	0.429766	0	0.204417
Lrrfip1	ENSMUSG00000026305	0.529266	0.152274	0	0.155061
Nrros	ENSMUSG00000052384	0.504075	0.297224	0	-0.0864487
Trmt12	ENSMUSG00000037085	0.313481	0.466841	0	-0.0211413
Gm26848	ENSMUSG00000097723	0.403386	0.3259	0	-0.116474
Nsmce1	ENSMUSG00000030750	0.448407	0.259483	0	-0.0934817
Dhrs3	ENSMUSG00000066026	0.368212	0.230065	0	0.602084
Pnn	ENSMUSG00000020994	0.303195	0.475218	0	0.367719
Suclg2	ENSMUSG00000061838	0.252495	0.378713	0	0.312972
Zfp943	ENSMUSG00000053347	0.393834	0.418769	0	-0.535157
Casp9	ENSMUSG00000028914	0.326248	0.448624	0	-0.108612
Mtmr7	ENSMUSG00000039431	0.526061	0.373016	0	-0.143101
Runx1	ENSMUSG00000022952	0.554975	0.196285	0	-0.0133706
Cacfd1	ENSMUSG00000015488	0.321704	0.469378	0	-0.317279
Dolpp1	ENSMUSG00000026856	0.317035	0.47388	0	0.320011
Atp5o	ENSMUSG00000022956	0.476692	0.228804	0	0.4579
Tspan3	ENSMUSG00000032324	0.539342	0.289257	0	-0.565219
Gpd2	ENSMUSG00000026827	0.513985	0.185382	0	0.0549214
Zcchc9	ENSMUSG00000021621	0.384788	0.430707	0	-0.0227569
Nr4a3	ENSMUSG00000028341	0.560691	0.159312	0	-0.243591
Irf7	ENSMUSG00000025498	0.459826	0.29334	0	-0.508327
Pprc1	ENSMUSG00000055491	0.152545	0.693154	0	0.0088155
4933407K13Rik	ENSMUSG00000087396	0.401723	0.497547	0	-0.509053
2810428I15Rik	ENSMUSG00000058833	0.439049	0.435216	0	0.237425
Ndufa10	ENSMUSG00000026260	0.32728	0.48163	0	0.367164
Ybx1	ENSMUSG00000028639	0.456722	0.313718	0	0.549134
Rasa2	ENSMUSG00000032413	0.425543	0.313527	0	-0.409484
Zmynd11	ENSMUSG00000021156	0.509575	0.151051	0	0.0320868
Igf2r	ENSMUSG00000023830	0.471236	0.151356	0	0.386402
Sla	ENSMUSG00000022372	0.521323	0.13637	0	-0.0994682
Ncoa3	ENSMUSG00000027678	0.514169	0.412018	0	-0.584703
Ccdc69	ENSMUSG00000049588	0.430742	0.466841	0	0.208188
Ttc27	ENSMUSG00000024078	0.395221	0.33821	0	0.0251472
1810032O08Rik	ENSMUSG00000020812	0.315836	0.466841	0	-0.0339381
Itga2b	ENSMUSG00000034664	0.354668	0.429766	0	-0.376668
Hcfc1	ENSMUSG00000031386	0.279597	0.346333	0	0.391711
Ttll5	ENSMUSG00000012609	0.431029	0.477319	0	0.165239
4930453N24Rik	ENSMUSG00000059920	0.288063	0.307938	0	0.383437
Ptpn5	ENSMUSG00000030854	0.416553	0.145072	0	-0.0656921
Cd40lg	ENSMUSG00000031132	0.455621	0.211301	0	-0.486785
Ktn1	ENSMUSG00000021843	0.392844	0.435216	0	-0.357941
Agpat5	ENSMUSG00000031467	0.393011	0.429766	0	0.432419
Osbpl9	ENSMUSG00000028559	0.500064	0.179834	0	0.0120054
Snx27	ENSMUSG00000028136	0.323684	0.458729	0	-0.0421283
Gadd45g	ENSMUSG00000021453	0.540406	0.148612	0	0.518452
Top1mt	ENSMUSG00000000934	0.362654	0.474633	0	0.0207747
Polr3e	ENSMUSG00000030880	0.460005	0.247219	0	-0.12847
Fxyd5	ENSMUSG00000009687	0.298396	0.348458	0	0.199304
Iqgap1	ENSMUSG00000030536	0.422544	0.330318	0	0.269275
Sdf4	ENSMUSG00000029076	0.601086	0.236369	0	0.123514
Orc5	ENSMUSG00000029012	0.352382	0.418769	0	0.0866805
Aldh7a1	ENSMUSG00000053644	0.336263	0.467462	0	-0.0527999
Man2a2	ENSMUSG00000038886	0.60565	0.221197	0	-0.43288
Vps16	ENSMUSG00000027411	0.352521	0.425376	0	0.0558711
Hif1a	ENSMUSG00000021109	0.306617	0.263023	0	0.100365
Lmln	ENSMUSG00000022802	0.588214	0.312612	0	0.386718
Rap1gds1	ENSMUSG00000028149	0.497544	0.0877624	0	-0.121712
Mnt	ENSMUSG00000000282	0.414207	0.311009	0	-0.227579
Ado	ENSMUSG00000057134	0.447927	0.478577	0	0.0726503
Pdlim7	ENSMUSG00000021493	0.402657	0.418769	0	-0.517184
Zfp467	ENSMUSG00000068551	0.358069	0.49331	0	-0.542291
Slc35b2	ENSMUSG00000037089	0.439648	0.41672	0	0.455195
Lrmp	ENSMUSG00000030263	0.353564	0.194765	0	0.068313
Tle4	ENSMUSG00000024642	0.355496	0.280004	0	-0.259
Pcsk7	ENSMUSG00000035382	0.337385	0.453154	0	0.190051
Hspa4l	ENSMUSG00000025757	0.417438	0.224967	0	0.180243
Hp1bp3	ENSMUSG00000028759	0.342625	0.429766	0	0.278263
Slc35c2	ENSMUSG00000017664	0.325238	0.445837	0	0.346278
Ifi35	ENSMUSG00000010358	0.240524	0.617196	0	0.0644219
Ercc5	ENSMUSG00000026048	0.371059	0.425376	0	-0.152156
Tecpr2	ENSMUSG00000021275	0.585166	0.328678	0	-0.0929489
H2-K1	ENSMUSG00000061232	0.454283	0.418769	0	-0.278845
Akr1a1	ENSMUSG00000028692	0.322987	0.442394	0	0.424004
Psd	ENSMUSG00000037126	0.35441	0.425968	0	-0.048981
Scarb2	ENSMUSG00000029426	0.663831	0.173166	0	-0.0962429
Zmym2	ENSMUSG00000021945	0.564045	0.232083	0	-0.448024
Ywhaz	ENSMUSG00000022285	0.668475	0.171906	0	0.443278
Pxk	ENSMUSG00000033885	0.636096	0.286511	0	-0.133074
Itga2	ENSMUSG00000015533	0.398416	0.204077	0	-0.0106437
Myc	ENSMUSG00000022346	0.228459	0.443035	0	0.0913668
Nsf	ENSMUSG00000034187	0.350528	0.45091	0	0.252427
Tomm20	ENSMUSG00000093904	0.309899	0.320594	0	-0.0560812
Cry1	ENSMUSG00000020038	0.467956	0.281735	0	0.0302344
Usp3	ENSMUSG00000032376	0.432456	0.435216	0	-0.392811
Slc9a3r1	ENSMUSG00000020733	0.447228	0.194018	0	0.32808
Dohh	ENSMUSG00000078440	0.369832	0.429766	0	0.404213
Phkb	ENSMUSG00000036879	0.433306	0.448624	0	-0.252628
Kat6a	ENSMUSG00000031540	0.47996	0.35105	0	-0.336068
Pde4b	ENSMUSG00000028525	0.423678	0.137724	0	0.0439164
Lbh	ENSMUSG00000024063	0.34294	0.378544	0	-0.546532
Ddx39b	ENSMUSG00000019432	0.449056	0.453154	0	0.200478
Wwox	ENSMUSG00000004637	0.374988	0.116758	0	0.549508
Gdf11	ENSMUSG00000025352	0.536058	0.232947	0	-0.54649
Ttc39b	ENSMUSG00000038172	0.435265	0.162848	0	0.0985895
Ttc17	ENSMUSG00000027194	0.376272	0.220005	0	-0.319721
Btd	ENSMUSG00000021900	0.391882	0.443035	0	0.0599794
Ly75	ENSMUSG00000026980	0.468444	0.143255	0	-0.0476154
Dusp7	ENSMUSG00000053716	0.436964	0.190344	0	-0.250539
Rgs9	ENSMUSG00000020599	0.280141	0.144305	0	-0.387532
Enpp1	ENSMUSG00000037370	0.622968	0.138795	0	-0.00385791
Camta2	ENSMUSG00000040712	0.452694	0.429766	0	-0.362698
Numa1	ENSMUSG00000066306	0.508637	0.318624	0	-0.151118
Ctsb	ENSMUSG00000021939	0.628328	0.265265	0	-0.570968
Rest	ENSMUSG00000029249	0.389116	0.226577	0	-0.0603209
Jak2	ENSMUSG00000024789	0.405309	0.172424	0	-0.378429
Slc35b4	ENSMUSG00000018999	0.4095	0.453154	0	0.371021
H2-Q10	ENSMUSG00000067235	0.189606	0.240139	0	-0.0406459
Lrpprc	ENSMUSG00000024120	0.364195	0.246634	0	0.211857
Tmco4	ENSMUSG00000041143	0.425501	0.221197	0	0.0266111
Smc6	ENSMUSG00000020608	0.401988	0.488668	0	0.347731
Hagh	ENSMUSG00000024158	0.427327	0.453154	0	-0.502412
Cmya5	ENSMUSG00000047419	0.437404	0.175525	0	-0.504457
Mtmr14	ENSMUSG00000030269	0.329022	0.463454	0	0.245603
Dusp14	ENSMUSG00000018648	0.51371	0.15862	0	0.108593
Baz1b	ENSMUSG00000002748	0.533447	0.29334	0	0.372375
Tbl1x	ENSMUSG00000025246	0.457506	0.107704	0	-0.0816057
Lpin2	ENSMUSG00000024052	0.419599	0.193111	0	0.0830358
Serpina9	ENSMUSG00000058260	0.293805	0.333315	0	0.192047
AI467606	ENSMUSG00000045165	0.645681	0.212688	0	-0.249413
Prkacb	ENSMUSG00000005034	0.385649	0.111459	0	-0.203108
Pias1	ENSMUSG00000032405	0.628848	0.143255	0	-0.0687786
Ddx31	ENSMUSG00000026806	0.549599	0.233727	0	0.0856666
Slc30a5	ENSMUSG00000021629	0.235655	0.610041	0	0.485597
Zfp592	ENSMUSG00000005621	0.634119	0.240815	0	-0.334255
Kmt2a	ENSMUSG00000002028	0.520168	0.191342	0	-0.575244
Snx9	ENSMUSG00000002365	0.711064	0.124878	0	0.396483
Lonrf1	ENSMUSG00000039633	0.347559	0.425376	0	-0.400005
Gsap	ENSMUSG00000039934	0.234066	0.31163	0	0.447844
Gprin3	ENSMUSG00000045441	0.388342	0.211301	0	0.345269
Pex14	ENSMUSG00000028975	0.299362	0.156053	0	0.215919
Osbpl5	ENSMUSG00000037606	0.4204	0.167508	0	0.441363
Xpo6	ENSMUSG00000000131	0.535254	0.286864	0	-0.132158
Fam53b	ENSMUSG00000030956	0.634798	0.102256	0	-0.220687
Galm	ENSMUSG00000035473	0.415729	0.254048	0	-0.208847
Scamp3	ENSMUSG00000028049	0.386976	0.460151	0	0.0668186
Cobll1	ENSMUSG00000034903	0.37745	0.197375	0	0.175968
Rfx5	ENSMUSG00000005774	0.266328	0.319841	0	-0.351414
Polr3b	ENSMUSG00000034453	0.208475	0.337827	0	-0.0988362
Wsb2	ENSMUSG00000029364	0.414406	0.279179	0	-0.157203
Prkch	ENSMUSG00000021108	0.533485	0.176414	0	-0.0267311
Ikbkb	ENSMUSG00000031537	0.301034	0.48163	0	-0.458161
Ccnc	ENSMUSG00000028252	0.180735	0.453154	0	0.344004
Nemp2	ENSMUSG00000043015	0.326559	0.31592	0	0.273072
Ilf3	ENSMUSG00000032178	0.416952	0.314666	0	0.102609
Itga3	ENSMUSG00000001507	0.391882	0.435216	0	0.0907271
Notch1	ENSMUSG00000026923	0.452209	0.268277	0	-0.120379
Mlxip	ENSMUSG00000038342	0.48444	0.309443	0	-0.576858
D17Wsu92e	ENSMUSG00000056692	0.277567	0.580209	0	-0.0219905
Klhl25	ENSMUSG00000055652	0.537013	0.225455	0	-0.130259
Ralgds	ENSMUSG00000026821	0.356635	0.296017	0	-0.0891403
Mpp2	ENSMUSG00000017314	0.282731	0.376852	0	0.135462
Bicdl1	ENSMUSG00000041609	0.419375	0.316753	0	-0.541349
Fgd3	ENSMUSG00000037946	0.553104	0.184353	0	-0.426767
Cd5	ENSMUSG00000024669	0.599121	0.249686	0	0.276161
Lclat1	ENSMUSG00000054469	0.29736	0.271455	0	0.344919
Auh	ENSMUSG00000021460	0.435269	0.148071	0	-0.100388
Tm9sf4	ENSMUSG00000068040	0.319077	0.214883	0	0.148324
Stk10	ENSMUSG00000020272	0.251972	0.411714	0	0.327783
Atxn7l1	ENSMUSG00000020564	0.406095	0.260967	0	-0.512229
Bnip1	ENSMUSG00000024191	0.354668	0.445837	0	0.356956
Ltn1	ENSMUSG00000052299	0.21656	0.302103	0	0.374766
Ets1	ENSMUSG00000032035	0.589863	0.190199	0	-0.403681
Tpm1	ENSMUSG00000032366	0.537331	0.279179	0	0.409702
Mark3	ENSMUSG00000007411	0.3757	0.447231	0	-0.035421
Rnf115	ENSMUSG00000028098	0.432238	0.165747	0	0.354023
Atg10	ENSMUSG00000021619	0.403235	0.296922	0	-0.568874
Galnt7	ENSMUSG00000031608	0.41829	0.113912	0	0.549203
Susd3	ENSMUSG00000021384	0.598686	0.141792	0	-0.420757
Nck2	ENSMUSG00000066877	0.426043	0.127841	0	-0.498533
Msl1	ENSMUSG00000052915	0.367728	0.470577	0	-0.176724
Cyth4	ENSMUSG00000018008	0.575554	0.140097	0	0.513685
Tbc1d16	ENSMUSG00000039976	0.452727	0.133076	0	0.12494
Dgcr6	ENSMUSG00000003531	0.378809	0.493839	0	-0.390246
Rptor	ENSMUSG00000025583	0.263691	0.281326	0	-0.0216122
Cysltr2	ENSMUSG00000033470	0.259155	0.283584	0	0.328469
Prrc2b	ENSMUSG00000039262	0.357591	0.283577	0	0.304683
Gdpd5	ENSMUSG00000035314	0.114752	0.460266	0	0.416374
Ptger4	ENSMUSG00000039942	0.601392	0.110599	0	0.173093
Srebf2	ENSMUSG00000022463	0.396496	0.347845	0	-0.568393
Dnajb13	ENSMUSG00000030708	0.306405	0.320594	0	0.00814169
Flna	ENSMUSG00000031328	0.422913	0.29407	0	0.218711
Mef2a	ENSMUSG00000030557	0.421702	0.183288	0	0.0126346
Tbc1d14	ENSMUSG00000029192	0.453837	0.216855	0	0.111902
Siae	ENSMUSG00000001942	0.460019	0.226577	0	0.0679567
Car12	ENSMUSG00000032373	0.30516	0.458729	0	0.310361
1110034G24Rik	ENSMUSG00000044991	0.410578	0.147465	0	-0.360482
Ciapin1	ENSMUSG00000031781	0.452973	0.15796	0	0.208466
Tapt1	ENSMUSG00000046985	0.258783	0.309392	0	-0.237708
Ppp1r12c	ENSMUSG00000019254	0.310805	0.429766	0	-0.215761
Ralgps2	ENSMUSG00000026594	0.497621	0.276846	0	-0.374326
Elmo1	ENSMUSG00000041112	0.532867	0.159277	0	0.0189949
Lag3	ENSMUSG00000030124	0.509587	0.128831	0	-0.62276
Pus10	ENSMUSG00000020280	0.48825	0.309443	0	0.311289
Tfip11	ENSMUSG00000029345	0.333705	0.211301	0	0.47554
Mlec	ENSMUSG00000048578	0.499131	0.318197	0	0.49607
Lnpep	ENSMUSG00000023845	0.464021	0.143255	0	0.0370534
Setbp1	ENSMUSG00000024548	0.302897	0.158566	0	0.175862
Cops7b	ENSMUSG00000026240	0.399493	0.466841	0	0.3377
Cry2	ENSMUSG00000068742	0.380885	0.432916	0	-0.431937
Nod1	ENSMUSG00000038058	0.336392	0.117644	0	0.265943
Thbs3	ENSMUSG00000028047	0.367811	0.490146	0	-0.637609
Vps45	ENSMUSG00000015747	0.592902	0.162225	0	0.198175
Sp2	ENSMUSG00000018678	0.491521	0.281735	0	0.387499
Synrg	ENSMUSG00000034940	0.500616	0.171906	0	0.0309617
H2afy	ENSMUSG00000015937	0.402745	0.329245	0	0.434131
Adcy7	ENSMUSG00000031659	0.265208	0.320069	0	-0.201263
Hmgn1	ENSMUSG00000040681	0.408106	0.435216	0	-0.285697
Ube2v1	ENSMUSG00000078923	0.443732	0.239337	0	-0.0330692
Ksr1	ENSMUSG00000018334	0.389786	0.255974	0	0.235391
Cdk17	ENSMUSG00000020015	0.469819	0.17666	0	-0.394855
Mms19	ENSMUSG00000025159	0.384704	0.486452	0	-0.336043
Smg7	ENSMUSG00000042772	0.216969	0.319117	0	0.125366
Tm7sf3	ENSMUSG00000040234	0.25423	0.315158	0	0.079552
Arf2	ENSMUSG00000062421	0.425696	0.418769	0	0.259039
Tex9	ENSMUSG00000090626	0.470683	0.181262	0	0.233712
Kif1bp	ENSMUSG00000036955	0.450682	0.160543	0	0.0838328
Scfd2	ENSMUSG00000062110	0.327819	0.464154	0	0.110033
Prkcq	ENSMUSG00000026778	0.612783	0.190925	0	-0.214956
Dvl2	ENSMUSG00000020888	0.393611	0.47388	0	-0.0359819
Zdhhc18	ENSMUSG00000037553	0.439489	0.31006	0	0.0158877
Sh3kbp1	ENSMUSG00000040990	0.428044	0.262465	0	-0.0101801
F730043M19Rik	ENSMUSG00000052125	0.276355	0.289568	0	-0.25203
Srgap2	ENSMUSG00000026425	0.470134	0.23686	0	0.0523034
Trerf1	ENSMUSG00000064043	0.354899	0.117866	0	0.0173216
Eprs	ENSMUSG00000026615	0.256005	0.309443	0	0.332924
Nsd3	ENSMUSG00000054823	0.333498	0.408369	0	-0.244363
Hipk3	ENSMUSG00000027177	0.462846	0.286511	0	0.0701322
Edem3	ENSMUSG00000043019	0.409333	0.159098	0	0.041853
Sema7a	ENSMUSG00000038264	0.443695	0.144305	0	0.514003
Trp53inp2	ENSMUSG00000038375	0.300212	0.422602	0	-0.484669
Copb1	ENSMUSG00000030754	0.230015	0.292541	0	0.348781
Mapkapk2	ENSMUSG00000016528	0.565297	0.107029	0	0.153667
Pde3b	ENSMUSG00000030671	0.483208	0.191243	0	-0.498818
2010111I01Rik	ENSMUSG00000021458	0.451135	0.0794887	0	0.401082
2009-09-01	ENSMUSG00000059248	0.424112	0.26816	0	-0.204189
Flot2	ENSMUSG00000061981	0.373888	0.442394	0	0.276401
Inpp4a	ENSMUSG00000026113	0.400696	0.170288	0	-0.342986
Lysmd4	ENSMUSG00000043831	0.335517	0.460151	0	-0.400847
Mvd	ENSMUSG00000006517	0.386042	0.209385	0	-0.43951
Arhgef6	ENSMUSG00000031133	0.305478	0.274571	0	0.299359
Slc3a2	ENSMUSG00000010095	0.47788	0.304993	0	0.151259
Dopey2	ENSMUSG00000022946	0.222721	0.181942	0	-0.0854801
Nsmce2	ENSMUSG00000059586	0.451545	0.098119	0	0.473452
Map3k3	ENSMUSG00000020700	0.33675	0.42879	0	-0.177196
Def6	ENSMUSG00000002257	0.581129	0.156009	0	0.419295
Hk3	ENSMUSG00000025877	0.3685	0.347431	0	0.0861864
Fnbp1	ENSMUSG00000075415	0.549988	0.132769	0	-0.15312
Rcor3	ENSMUSG00000037395	0.36025	0.216458	0	-0.124477
Myl12b	ENSMUSG00000034868	0.552254	0.160543	0	-0.047911
Rpgr	ENSMUSG00000031174	0.314275	0.445837	0	0.486479
Ppp1r3b	ENSMUSG00000046794	0.545917	0.297224	0	-0.494524
Tpm3	ENSMUSG00000027940	0.302697	0.281735	0	0.555825
Slc20a2	ENSMUSG00000037656	0.463928	0.240815	0	0.320055
Noct	ENSMUSG00000023087	0.422916	0.225455	0	-0.410569
Lpxn	ENSMUSG00000024696	0.330973	0.277813	0	-0.37021
Cfdp1	ENSMUSG00000031954	0.129305	0.134451	0	0.290069
Cdk5rap1	ENSMUSG00000027487	0.307548	0.283584	0	-0.512695
Specc1l	ENSMUSG00000033444	0.348293	0.140309	0	0.0435765
Sdccag8	ENSMUSG00000026504	0.312183	0.280459	0	0.0182092
Gramd3	ENSMUSG00000001700	0.3406	0.252502	0	0.0896671
Arpc2	ENSMUSG00000006304	0.45917	0.199699	0	0.21248
Disp1	ENSMUSG00000030768	0.615737	0.109299	0	-0.354186
Tmem55a	ENSMUSG00000028221	0.366794	0.422602	0	-0.133111
Rsbn1l	ENSMUSG00000039968	0.362125	0.116864	0	-0.195328
Inpp5b	ENSMUSG00000028894	0.25555	0.570094	0	-0.148768
Gpatch8	ENSMUSG00000034621	0.516684	0.323818	0	-0.118524
Iqgap2	ENSMUSG00000021676	0.269643	0.400311	0	0.342372
Ago2	ENSMUSG00000036698	0.531275	0.0795706	0	0.210015
Cwc27	ENSMUSG00000021715	0.273809	0.316422	0	0.222113
Satb1	ENSMUSG00000023927	0.554535	0.225688	0	-0.306203
Pip5k1c	ENSMUSG00000034902	0.296899	0.330406	0	0.297766
Cela1	ENSMUSG00000023031	0.33285	0.328743	0	-0.548018
Cwf19l2	ENSMUSG00000025898	0.304491	0.490425	0	0.0624154
Prdm2	ENSMUSG00000057637	0.389908	0.299547	0	-0.54152
Daxx	ENSMUSG00000002307	0.44232	0.283584	0	-0.109366
Kif2a	ENSMUSG00000021693	0.28337	0.302103	0	0.436126
Ptk2b	ENSMUSG00000059456	0.416817	0.236847	0	-0.211572
Ascc1	ENSMUSG00000044475	0.396705	0.300198	0	-0.261609
Tusc3	ENSMUSG00000039530	0.360444	0.352008	0	0.200737
Nars	ENSMUSG00000024587	0.204799	0.434888	0	0.51831
Tram2	ENSMUSG00000041779	0.33443	0.454924	0	-0.152679
Zfp3	ENSMUSG00000043602	0.367156	0.432916	0	0.162437
Adgrl1	ENSMUSG00000013033	0.475102	0.299083	0	-0.097895
Mnd1	ENSMUSG00000033752	0.202753	0.122794	0	0.485741
Gpam	ENSMUSG00000024978	0.227051	0.312919	0	0.328214
Gng12	ENSMUSG00000036402	0.453205	0.0800019	0	-0.095042
Rad23b	ENSMUSG00000028426	0.317335	0.232083	0	0.345354
BC049352	ENSMUSG00000091996	0.195342	0.450081	0	-0.490623
Fam60a	ENSMUSG00000039985	0.229792	0.283584	0	0.406829
A430093F15Rik	ENSMUSG00000067577	0.557721	0.107408	0	0.0329233
Ikzf3	ENSMUSG00000018168	0.555176	0.168785	0	0.257432
Selplg	ENSMUSG00000048163	0.495637	0.147465	0	0.491742
Tamm41	ENSMUSG00000030316	0.157793	0.225455	0	0.442702
Ppa2	ENSMUSG00000028013	0.402089	0.108804	0	0.546909
Lcp2	ENSMUSG00000002699	0.446053	0.234706	0	-0.00259975
Tbc1d10a	ENSMUSG00000034412	0.442689	0.167508	0	0.0021159
Slc10a7	ENSMUSG00000031684	0.274786	0.357929	0	0.41376
Arhgef12	ENSMUSG00000059495	0.454311	0.217608	0	-0.377583
Gpat4	ENSMUSG00000031545	0.311618	0.288611	0	0.353818
Gtf2i	ENSMUSG00000060261	0.315612	0.149224	0	0.0948642
Cacnb3	ENSMUSG00000003352	0.291417	0.300607	0	-0.231371
Acot8	ENSMUSG00000017307	0.409598	0.212688	0	0.330814
Rab11fip4	ENSMUSG00000017639	0.432207	0.175851	0	-0.317652
Zbtb25	ENSMUSG00000056459	0.529429	0.173166	0	0.0170024
Kat2b	ENSMUSG00000000708	0.613382	0.133722	0	-0.371244
Stk39	ENSMUSG00000027030	0.504598	0.141582	0	0.0311671
Itgb3	ENSMUSG00000020689	0.315032	0.28305	0	-0.034009
Eps15l1	ENSMUSG00000006276	0.423489	0.149574	0	-0.0219329
Akap13	ENSMUSG00000066406	0.442434	0.173944	0	-0.25763
Heca	ENSMUSG00000039879	0.449605	0.315158	0	-0.534985
Stat4	ENSMUSG00000062939	0.48094	0.0409301	0	-0.109375
Rel	ENSMUSG00000020275	0.492699	0.176004	0	-0.254121
Dhx15	ENSMUSG00000029169	0.372146	0.45091	0	0.332135
Cd82	ENSMUSG00000027215	0.466476	0.0768367	0	0.0469425
4933434E20Rik	ENSMUSG00000027942	0.346012	0.467455	0	-0.160172
Grk5	ENSMUSG00000003228	0.246923	0.12279	0	0.422482
Mtf1	ENSMUSG00000028890	0.241993	0.292541	0	0.136324
Dnajb12	ENSMUSG00000020109	0.516051	0.125717	0	0.10179
Ppp1r12a	ENSMUSG00000019907	0.495732	0.185382	0	0.294331
Gm8369	ENSMUSG00000058470	0.471709	0.196674	0	-0.110554
Tbc1d2b	ENSMUSG00000037410	0.448447	0.121702	0	-0.326439
Ndufaf6	ENSMUSG00000050323	0.287589	0.329802	0	-0.13332
Jdp2	ENSMUSG00000034271	0.287121	0.192838	0	-0.0245433
Rasgrp1	ENSMUSG00000027347	0.364324	0.210906	0	-0.306551
Sik3	ENSMUSG00000034135	0.310953	0.214403	0	-0.31379
E430024P14Rik	ENSMUSG00000090069	0.351457	0.169416	0	-0.402463
Prosc	ENSMUSG00000031485	0.316478	0.485923	0	0.0402616
Trim37	ENSMUSG00000018548	0.249965	0.329477	0	0.420817
Itk	ENSMUSG00000020395	0.596075	0.177501	0	-0.260607
Rev3l	ENSMUSG00000019841	0.265009	0.312974	0	-0.242415
Nlrc5	ENSMUSG00000074151	0.474596	0.0963259	0	-0.396951
Son	ENSMUSG00000022961	0.481267	0.220005	0	-0.392028
Faf1	ENSMUSG00000010517	0.435631	0.189095	0	0.364211
Coro1c	ENSMUSG00000004530	0.501863	0.157579	0	0.41455
Vgll4	ENSMUSG00000030315	0.388108	0.172379	0	-0.0881147
Mks1	ENSMUSG00000034121	0.358069	0.429766	0	-0.236658
Sh3rf1	ENSMUSG00000031642	0.531642	0.261422	0	-0.502517
Cat	ENSMUSG00000027187	0.291305	0.302103	0	0.241269
Sh2d2a	ENSMUSG00000028071	0.436308	0.13959	0	-0.133346
Csrnp1	ENSMUSG00000032515	0.55454	0.110599	0	0.0149179
Tango6	ENSMUSG00000041949	0.256844	0.0967146	0	0.331913
Syt12	ENSMUSG00000049303	0.348145	0.41672	0	-0.210204
Klhl2	ENSMUSG00000031605	0.575174	0.18721	0	0.167004
Fam120a	ENSMUSG00000038014	0.197307	0.441467	0	0.276732
Dbr1	ENSMUSG00000032469	0.309694	0.321086	0	0.548637
Fgd6	ENSMUSG00000020021	0.343462	0.226577	0	-0.555728
C2cd5	ENSMUSG00000030279	0.241662	0.3997	0	0.127276
Gpr146	ENSMUSG00000044197	0.453521	0.135068	0	-0.411867
Wars2	ENSMUSG00000004233	0.248042	0.29334	0	-0.227363
Grap	ENSMUSG00000004837	0.408753	0.197318	0	-0.0190757
Sidt2	ENSMUSG00000034908	0.439755	0.297224	0	-0.397884
Pik3r5	ENSMUSG00000020901	0.300301	0.158112	0	0.397599
Rnf141	ENSMUSG00000030788	0.387499	0.230954	0	-0.122394
Panx1	ENSMUSG00000031934	0.449346	0.21221	0	0.407877
Nfkb1	ENSMUSG00000028163	0.472039	0.192305	0	-0.200857
Slc2a3	ENSMUSG00000003153	0.349653	0.175525	0	0.333368
Nbeal2	ENSMUSG00000056724	0.31345	0.179974	0	0.467648
Ppip5k2	ENSMUSG00000040648	0.304379	0.323363	0	0.0766613
Mettl7a1	ENSMUSG00000054619	0.332711	0.32038	0	-0.484164
Nup153	ENSMUSG00000021374	0.240915	0.4744	0	-0.15272
Tex261	ENSMUSG00000014748	0.290832	0.32931	0	0.125467
Ylpm1	ENSMUSG00000021244	0.287551	0.292541	0	0.0462847
Afg3l2	ENSMUSG00000024527	0.12983	0.347911	0	0.19467
Etv4	ENSMUSG00000017724	0.314275	0.425376	0	0.593828
Gne	ENSMUSG00000028479	0.469155	0.17015	0	0.211741
Got1	ENSMUSG00000025190	0.307966	0.277813	0	0.0977173
Men1	ENSMUSG00000024947	0.470168	0.300607	0	0.273731
Cdc42	ENSMUSG00000006699	0.205419	0.454694	0	0.304523
Sall2	ENSMUSG00000049532	0.236715	0.312017	0	-0.28012
Npc2	ENSMUSG00000021242	0.382544	0.13596	0	-0.449857
Cap1	ENSMUSG00000028656	0.409368	0.112728	0	0.237583
Rab22a	ENSMUSG00000027519	0.337252	0.234459	0	-0.0740836
Maml2	ENSMUSG00000031925	0.581659	0.0684514	0	-0.570222
Ccser2	ENSMUSG00000058690	0.403106	0.234351	0	-0.276082
Ecd	ENSMUSG00000021810	0.264359	0.277813	0	0.494752
Fam169b	ENSMUSG00000074071	0.342471	0.309624	0	-0.569316
Tank	ENSMUSG00000064289	0.460663	0.106344	0	-0.265401
Crcp	ENSMUSG00000025532	0.274654	0.288611	0	0.245611
Bcl3	ENSMUSG00000053175	0.362306	0.211301	0	0.100572
Prmt3	ENSMUSG00000030505	0.472389	0.323948	0	-0.228435
Apbb1ip	ENSMUSG00000026786	0.349611	0.156264	0	0.350947
Pdcd11	ENSMUSG00000025047	0.345023	0.440011	0	0.168688
Gm11110	ENSMUSG00000079414	0.25647	0.318903	0	-0.457013
Ankrd10	ENSMUSG00000031508	0.24426	0.31592	0	-0.156728
Foxn2	ENSMUSG00000034998	0.267117	0.129473	0	-0.100942
Ar	ENSMUSG00000046532	0.156085	0.423989	0	0.507816
Abr	ENSMUSG00000017631	0.245954	0.258376	0	0.285747
Psmb7	ENSMUSG00000026750	0.292551	0.290144	0	0.523134
Map4	ENSMUSG00000032479	0.398339	0.289817	0	0.40205
Sytl2	ENSMUSG00000030616	0.310735	0.249223	0	0.165996
Nf2	ENSMUSG00000009073	0.45419	0.0755257	0	0.0759245
S100a11	ENSMUSG00000027907	0.213903	0.319916	0	-0.422571
Nebl	ENSMUSG00000053702	0.533738	0.0628587	0	-0.0319598
Icam1	ENSMUSG00000037405	0.380175	0.225455	0	0.336565
Zfp407	ENSMUSG00000048410	0.362686	0.179296	0	-0.289375
Git1	ENSMUSG00000011877	0.477894	0.220005	0	-0.0404361
Prdm1	ENSMUSG00000038151	0.474216	0.103743	0	0.560486
Pigl	ENSMUSG00000014245	0.508299	0.192652	0	0.0476403
Pxmp4	ENSMUSG00000000876	0.306684	0.326922	0	-0.441108
Spice1	ENSMUSG00000043065	0.104758	0.310331	0	0.544171
Rrp15	ENSMUSG00000001305	0.248097	0.315158	0	0.259206
Neil3	ENSMUSG00000039396	0.23763	0.438805	0	0.503714
Hdc	ENSMUSG00000027360	0.335231	0.216458	0	-0.0467016
Cblb	ENSMUSG00000022637	0.511575	0.109583	0	-0.35293
Rdh11	ENSMUSG00000066441	0.357957	0.234689	0	0.30752
Trim11	ENSMUSG00000020455	0.324199	0.445837	0	-0.233504
Ptprs	ENSMUSG00000013236	0.369574	0.275751	0	-0.396543
Lrsam1	ENSMUSG00000026792	0.23468	0.279179	0	-0.0601324
Gpt2	ENSMUSG00000031700	0.263429	0.331902	0	0.808023
Chd1	ENSMUSG00000023852	0.443565	0.244326	0	-0.308444
Ubl3	ENSMUSG00000001687	0.37846	0.153384	0	-0.265662
Ldb1	ENSMUSG00000025223	0.517276	0.230954	0	-0.386788
Agps	ENSMUSG00000042410	0.418058	0.20836	0	0.504922
Cyfip2	ENSMUSG00000020340	0.380093	0.267195	0	0.156584
Trim36	ENSMUSG00000033949	0.446975	0.315158	0	0.101899
Arfgef2	ENSMUSG00000074582	0.265371	0.311636	0	0.11653
Prdm10	ENSMUSG00000042496	0.341427	0.230076	0	-0.142453
Ms4a4b	ENSMUSG00000056290	0.376112	0.243338	0	0.464397
Ccdc84	ENSMUSG00000043923	0.276698	0.32694	0	-0.420799
Amz2	ENSMUSG00000020610	0.390836	0.0990748	0	-0.172741
Fhl2	ENSMUSG00000008136	0.201427	0.193603	0	0.250808
Nek7	ENSMUSG00000026393	0.360616	0.0942682	0	-0.389657
Prkag1	ENSMUSG00000067713	0.413173	0.226577	0	0.328111
Fes	ENSMUSG00000053158	0.44245	0.209385	0	0.209524
Smim14	ENSMUSG00000037822	0.429027	0.245477	0	-0.449514
Esr1	ENSMUSG00000019768	0.296881	0.322731	0	-0.556984
Diexf	ENSMUSG00000016181	0.423257	0.230076	0	-0.201136
Vopp1	ENSMUSG00000037788	0.239602	0.230076	0	-0.209888
Aak1	ENSMUSG00000057230	0.266409	0.305405	0	-0.0419562
R3hdm2	ENSMUSG00000025404	0.43194	0.225455	0	-0.130701
Suclg1	ENSMUSG00000052738	0.375112	0.371332	0	0.0997963
Cdyl2	ENSMUSG00000031758	0.419049	0.0520029	0	0.197238
Alpk2	ENSMUSG00000032845	0.578364	0.100785	0	-0.0527586
Arhgap15	ENSMUSG00000049744	0.396391	0.0580288	0	-0.429862
Nf1	ENSMUSG00000020716	0.441826	0.23455	0	-0.37411
Cux1	ENSMUSG00000029705	0.532742	0.182172	0	-0.422556
Gm26885	ENSMUSG00000097125	0.457796	0.237316	0	-0.244252
Itgb2	ENSMUSG00000000290	0.414204	0.234706	0	0.548913
Herc4	ENSMUSG00000020064	0.324562	0.277813	0	-0.181782
Agfg2	ENSMUSG00000029722	0.394269	0.181262	0	0.503615
Rcsd1	ENSMUSG00000040723	0.460592	0.098832	0	-0.08675
Traf5	ENSMUSG00000026637	0.364369	0.148612	0	-0.235909
Cdyl	ENSMUSG00000059288	0.197151	0.357468	0	0.157334
Dgke	ENSMUSG00000000276	0.232152	0.292541	0	-0.180242
Slc44a2	ENSMUSG00000057193	0.377397	0.352187	0	-0.323695
Dot1l	ENSMUSG00000061589	0.338957	0.348769	0	0.139255
Spin1	ENSMUSG00000021395	0.409495	0.187751	0	-0.203035
Gm17173	ENSMUSG00000090709	0.325063	0.332785	0	-1.86923
Arhgap45	ENSMUSG00000035697	0.487252	0.167508	0	-0.378738
Plcb3	ENSMUSG00000024960	0.321621	0.445837	0	-0.0391163
Pde4dip	ENSMUSG00000038170	0.240503	0.215541	0	0.199146
Orai2	ENSMUSG00000039747	0.391832	0.176958	0	-0.557789
Ctdp1	ENSMUSG00000033323	0.232728	0.313342	0	0.266213
Katnal1	ENSMUSG00000041298	0.138943	0.391417	0	-0.2376
Fam107b	ENSMUSG00000026655	0.340953	0.219348	0	0.198709
3110082I17Rik	ENSMUSG00000053553	0.314247	0.312017	0	0.499424
Ranbp9	ENSMUSG00000038546	0.49411	0.166688	0	0.095474
Man2a1	ENSMUSG00000024085	0.23272	0.227274	0	-0.19988
Coro7	ENSMUSG00000039637	0.307464	0.318903	0	0.0879361
Sgip1	ENSMUSG00000028524	0.407973	0.107788	0	-0.857553
Cers6	ENSMUSG00000027035	0.320123	0.104652	0	0.162749
Gtf2a1	ENSMUSG00000020962	0.435293	0.234013	0	0.0234001
Klf13	ENSMUSG00000052040	0.345258	0.13903	0	-0.141928
Atp2b1	ENSMUSG00000019943	0.499644	0.132619	0	0.0346356
Pmepa1	ENSMUSG00000038400	0.426114	0.145072	0	0.292374
Fbxo11	ENSMUSG00000005371	0.397242	0.104692	0	-0.431189
Arhgef10	ENSMUSG00000071176	0.385628	0.207749	0	-0.239311
Armc3	ENSMUSG00000037683	0.346366	0.192652	0	-1.06017
Gng2	ENSMUSG00000043004	0.246704	0.405821	0	-0.0727816
Ebag9	ENSMUSG00000022339	0.26933	0.30897	0	0.24106
Mta3	ENSMUSG00000055817	0.33126	0.0865199	0	0.0759509
Pomgnt1	ENSMUSG00000028700	0.201733	0.234459	0	0.0829465
Usp24	ENSMUSG00000028514	0.278204	0.30897	0	-0.519038
Usp49	ENSMUSG00000090115	0.291482	0.313718	0	0.339207
Stim2	ENSMUSG00000039156	0.349929	0.131603	0	0.136791
Park7	ENSMUSG00000028964	0.382256	0.162574	0	0.342606
Pdpk1	ENSMUSG00000024122	0.376813	0.195551	0	0.232406
Stau1	ENSMUSG00000039536	0.465269	0.171906	0	-0.250662
Tgm4	ENSMUSG00000025787	0.236259	0.319916	0	0.461451
Vps18	ENSMUSG00000034216	0.279254	0.299083	0	0.00920364
D1Ertd622e	ENSMUSG00000044768	0.376537	0.242522	0	-0.448568
Atp2c1	ENSMUSG00000032570	0.308282	0.187567	0	0.221347
Sfmbt2	ENSMUSG00000061186	0.236092	0.306405	0	0.179002
Ubxn11	ENSMUSG00000012126	0.346152	0.224312	0	0.011346
Tspo	ENSMUSG00000041736	0.13705	0.365099	0	0.139091
Nrd1	ENSMUSG00000053510	0.185056	0.211301	0	0.190723
Zfp472	ENSMUSG00000053600	0.432916	0.323697	0	-0.00903599
Rassf2	ENSMUSG00000027339	0.126585	0.273907	0	-0.325053
Galnt12	ENSMUSG00000039774	0.303641	0.45091	0	0.393305
Frs2	ENSMUSG00000020170	0.485753	0.204756	0	-0.500563
Fmnl3	ENSMUSG00000023008	0.400733	0.145072	0	-0.0746759
Cd9	ENSMUSG00000030342	0.206376	0.312612	0	0.245388
Fli1	ENSMUSG00000016087	0.370381	0.190916	0	0.156411
Esyt2	ENSMUSG00000021171	0.539408	0.158917	0	-0.400092
Prkd2	ENSMUSG00000041187	0.50046	0.12279	0	-0.112284
Gse1	ENSMUSG00000031822	0.327055	0.186671	0	-0.0810203
Disc1	ENSMUSG00000043051	0.30716	0.308877	0	-1.15936
Slc37a1	ENSMUSG00000024036	0.294937	0.328779	0	-0.0108096
Wipf1	ENSMUSG00000075284	0.357262	0.0514949	0	0.0393336
Pvr	ENSMUSG00000040511	0.339687	0.176004	0	-0.136524
Ift80	ENSMUSG00000027778	0.395409	0.285173	0	-0.447715
Psd4	ENSMUSG00000026979	0.349618	0.309262	0	-0.00329623
Dennd4c	ENSMUSG00000038024	0.278928	0.33101	0	-0.163021
Igf2bp3	ENSMUSG00000029814	0.32168	0.113289	0	0.424246
Tnrc18	ENSMUSG00000039477	0.219512	0.245461	0	-0.125367
Ankrd17	ENSMUSG00000055204	0.508452	0.138512	0	-0.270726
Psap	ENSMUSG00000004207	0.513963	0.178335	0	0.064537
Bpnt1	ENSMUSG00000026617	0.25647	0.30582	0	-0.00759759
1110008F13Rik	ENSMUSG00000027637	0.448118	0.299083	0	0.135688
Cep164	ENSMUSG00000043987	0.441	0.214883	0	-0.0942322
B4galt7	ENSMUSG00000021504	0.222507	0.30897	0	0.0268326
Cage1	ENSMUSG00000044566	0.212806	0.302103	0	-0.0494931
Gnaq	ENSMUSG00000024639	0.235868	0.0998216	0	0.171861
Hrh2	ENSMUSG00000034987	0.183735	0.226577	0	0.211316
Sgcb	ENSMUSG00000029156	0.244297	0.279179	0	0.445542
Akna	ENSMUSG00000039158	0.359503	0.208981	0	0.0563974
2003-03-01	ENSMUSG00000032656	0.247309	0.264446	0	-0.515425
Tbc1d5	ENSMUSG00000023923	0.504167	0.119648	0	-0.0706246
Kcnn4	ENSMUSG00000054342	0.524066	0.14667	0	0.137737
Smad1	ENSMUSG00000031681	0.428902	0.166688	0	-0.544491
Upf1	ENSMUSG00000058301	0.232152	0.316812	0	0.153457
Sik2	ENSMUSG00000037112	0.493638	0.12369	0	-0.343307
Mrps21	ENSMUSG00000054312	0.249296	0.321086	0	0.244547
Pitrm1	ENSMUSG00000021193	0.224923	0.290144	0	0.355041
Farsb	ENSMUSG00000026245	0.362728	0.13905	0	0.419768
Pafah1b2	ENSMUSG00000003131	0.425215	0.230076	0	0.287135
Agtpbp1	ENSMUSG00000021557	0.144719	0.30135	0	0.223149
Rin3	ENSMUSG00000044456	0.229342	0.228938	0	0.00153533
Ccdc93	ENSMUSG00000026339	0.261887	0.29334	0	-0.390766
Lmtk2	ENSMUSG00000038970	0.158413	0.449628	0	0.0337209
Nt5c3	ENSMUSG00000029780	0.395881	0.257906	0	0.027945
Tmtc4	ENSMUSG00000041594	0.26651	0.140867	0	0.320167
Gm4221	ENSMUSG00000096948	0.354785	0.181262	0	0.195036
Slc26a2	ENSMUSG00000034320	0.258768	0.174086	0	-0.0306924
Fut8	ENSMUSG00000021065	0.315613	0.176004	0	-0.546711
H3f3b	ENSMUSG00000016559	0.320687	0.288611	0	0.29472
Mrps27	ENSMUSG00000041632	0.166075	0.17945	0	0.338481
Sag	ENSMUSG00000056055	0.460318	0.217608	0	-0.316819
Wdr4	ENSMUSG00000024037	0.302456	0.315158	0	0.267884
Rcor1	ENSMUSG00000037896	0.368394	0.189095	0	-0.110021
Zfp277	ENSMUSG00000055917	0.263782	0.306767	0	-0.269166
Ssfa2	ENSMUSG00000027007	0.1701	0.222918	0	-0.212438
Gatad2a	ENSMUSG00000036180	0.312387	0.161496	0	0.189166
Smarca2	ENSMUSG00000024921	0.459747	0.150717	0	-0.397655
Fis1	ENSMUSG00000019054	0.202994	0.310596	0	-0.000757557
Sos1	ENSMUSG00000024241	0.514012	0.166067	0	-0.416726
Dhx32	ENSMUSG00000030986	0.277739	0.328799	0	0.145103
Taf4	ENSMUSG00000039117	0.414643	0.232083	0	0.109256
Fbxw11	ENSMUSG00000020271	0.553721	0.123557	0	-0.26041
Tmem221	ENSMUSG00000043664	0.222321	0.29334	0	0.338476
Mapk1	ENSMUSG00000063358	0.332527	0.32928	0	0.16517
Uggt2	ENSMUSG00000042104	0.10757	0.395913	0	-0.0328152
Gtpbp2	ENSMUSG00000023952	0.346995	0.240815	0	-0.208124
Adat1	ENSMUSG00000031949	0.222136	0.297118	0	0.175702
Homer1	ENSMUSG00000007617	0.332356	0.190918	0	-0.420887
Sorl1	ENSMUSG00000049313	0.180566	0.224776	0	-0.0460577
Spata13	ENSMUSG00000021990	0.39385	0.159689	0	-0.19108
Galnt2	ENSMUSG00000089704	0.423524	0.156366	0	-0.31931
Hbs1l	ENSMUSG00000019977	0.349985	0.188005	0	0.0368356
Map6	ENSMUSG00000055407	0.319584	0.128553	0	0.286134
Relt	ENSMUSG00000008318	0.13705	0.37567	0	0.0957286
Arf1	ENSMUSG00000048076	0.363817	0.184763	0	0.271657
Cnst	ENSMUSG00000038949	0.261074	0.45689	0	-0.413151
Stx6	ENSMUSG00000026470	0.35867	0.121536	0	-0.409704
Lrch3	ENSMUSG00000022801	0.334101	0.3621	0	-0.352014
Tmem135	ENSMUSG00000039428	0.389445	0.153907	0	-0.373891
Zbtb8a	ENSMUSG00000028807	0.352563	0.222918	0	0.475459
Eya3	ENSMUSG00000028886	0.397479	0.240139	0	0.252588
Clip2	ENSMUSG00000063146	0.380613	0.260124	0	-0.564456
Dph5	ENSMUSG00000033554	0.326011	0.283584	0	-0.00111574
Ccdc28b	ENSMUSG00000028795	0.200104	0.299083	0	-0.339591
Tmcc3	ENSMUSG00000020023	0.288905	0.300263	0	-0.0922908
Arhgef3	ENSMUSG00000021895	0.488665	0.0625909	0	-0.254302
Pced1b	ENSMUSG00000044250	0.325509	0.107684	0	-0.323115
Ptpn6	ENSMUSG00000004266	0.303521	0.166688	0	0.0379137
Sec11a	ENSMUSG00000025724	0.522477	0.18721	0	0.275725
Ncoa2	ENSMUSG00000005886	0.48929	0.0523461	0	-0.138753
Bptf	ENSMUSG00000040481	0.431051	0.0850751	0	-0.264102
Phc2	ENSMUSG00000028796	0.440196	0.119648	0	-0.504583
Rpl38	ENSMUSG00000057322	0.206757	0.299083	0	-0.0703925
Srrm2	ENSMUSG00000039218	0.400385	0.238968	0	-0.48549
Celsr1	ENSMUSG00000016028	0.329113	0.117654	0	-0.32809
Ms4a4d	ENSMUSG00000024678	0.230013	0.472556	0	0.177957
Myo1h	ENSMUSG00000066952	0.371533	0.145072	0	-0.734036
Mta1	ENSMUSG00000021144	0.413654	0.222918	0	0.211423
Nmnat2	ENSMUSG00000042751	0.107257	0.221518	0	0.108217
Usp15	ENSMUSG00000020124	0.384057	0.241487	0	0.166829
Rasa3	ENSMUSG00000031453	0.268396	0.180755	0	0.489743
Ccdc88c	ENSMUSG00000021182	0.409421	0.0425111	0	-0.133609
Plekha5	ENSMUSG00000030231	0.341181	0.0533123	0	0.119987
Prkcd	ENSMUSG00000021948	0.220844	0.322954	0	0.114507
Stim1	ENSMUSG00000030987	0.366688	0.300594	0	-0.219525
Pitpnb	ENSMUSG00000050017	0.211015	0.239177	0	0.260733
Ptpn1	ENSMUSG00000027540	0.469855	0.108717	0	-0.195377
Cdc37	ENSMUSG00000019471	0.375904	0.192652	0	0.297235
Rims3	ENSMUSG00000032890	0.196589	0.217608	0	0.196561
Oplah	ENSMUSG00000022562	0.213231	0.232083	0	0.201272
Spred2	ENSMUSG00000045671	0.510605	0.047264	0	-0.0912694
Clpx	ENSMUSG00000015357	0.472396	0.221197	0	0.25677
Pigv	ENSMUSG00000043257	0.201997	0.20836	0	-0.291456
Bbx	ENSMUSG00000022641	0.217762	0.187501	0	-0.228565
Fam69a	ENSMUSG00000029270	0.375632	0.168918	0	0.275932
Ppp1r16b	ENSMUSG00000037754	0.32432	0.186411	0	-0.162679
Dync2h1	ENSMUSG00000047193	0.249668	0.302103	0	-0.124127
Atp10a	ENSMUSG00000025324	0.335476	0.148134	0	0.568129
Skil	ENSMUSG00000027660	0.388928	0.212688	0	-0.128461
Trappc10	ENSMUSG00000000374	0.440143	0.242397	0	0.0696599
Atxn7	ENSMUSG00000021738	0.482073	0.0906308	0	-0.568675
Ahnak	ENSMUSG00000069833	0.398162	0.063184	0	-0.0476754
Trmo	ENSMUSG00000028331	0.404594	0.211301	0	-0.0729868
Psmg1	ENSMUSG00000022913	0.246509	0.312017	0	-0.0772794
Wasl	ENSMUSG00000029684	0.175856	0.447377	0	-0.392953
Pik3r1	ENSMUSG00000041417	0.389356	0.110442	0	0.0218052
Nrp1	ENSMUSG00000025810	0.0967952	0.199655	0	0.480349
Ibtk	ENSMUSG00000035941	0.301657	0.279179	0	0.237761
Bicd2	ENSMUSG00000037933	0.211357	0.31592	0	0.433924
Fbxo33	ENSMUSG00000035329	0.30768	0.362523	0	-0.315503
Ppm1h	ENSMUSG00000034613	0.318247	0.0401358	0	0.0577688
Thoc7	ENSMUSG00000053453	0.236055	0.321086	0	0.264359
Gfod2	ENSMUSG00000013150	0.181627	0.443844	0	-0.313292
H6pd	ENSMUSG00000028980	0.417719	0.166012	0	0.278882
Nedd4l	ENSMUSG00000024589	0.153443	0.236941	0	-0.428829
Tmem116	ENSMUSG00000029452	0.2268	0.297224	0	0.325587
Lims1	ENSMUSG00000019920	0.420805	0.0883242	0	-0.23348
Tmem9	ENSMUSG00000026411	0.270835	0.299083	0	-0.256179
Mtmr3	ENSMUSG00000034354	0.309564	0.153384	0	-0.0947145
Umad1	ENSMUSG00000089862	0.116499	0.305615	0	-0.270363
Nbn	ENSMUSG00000028224	0.234921	0.277813	0	-0.206881
Sh3bp2	ENSMUSG00000054520	0.193795	0.250535	0	0.329284
Cmtm6	ENSMUSG00000032434	0.472008	0.156859	0	-0.0631362
Atg7	ENSMUSG00000030314	0.10437	0.159143	0	0.226111
Gxylt1	ENSMUSG00000036197	0.173173	0.106372	0	-0.00664778
Slc25a51	ENSMUSG00000045973	0.325883	0.198868	0	-0.289644
Heg1	ENSMUSG00000075254	0.342198	0.124621	0	-0.569136
Ranbp2	ENSMUSG00000003226	0.246613	0.209385	0	-0.150982
Atf7ip	ENSMUSG00000030213	0.200098	0.0859532	0	-0.274628
Abcc4	ENSMUSG00000032849	0.215729	0.192829	0	0.15868
Capns1	ENSMUSG00000001794	0.221504	0.299083	0	0.113442
Foxk1	ENSMUSG00000056493	0.369431	0.0970089	0	0.0154743
Socs6	ENSMUSG00000056153	0.152225	0.209385	0	0.0501446
Pdcd5	ENSMUSG00000030417	0.227664	0.294929	0	0.437282
Mob3a	ENSMUSG00000003348	0.303716	0.181262	0	0.288192
Rnf145	ENSMUSG00000019189	0.376885	0.209681	0	-0.500656
Dnajc1	ENSMUSG00000026740	0.405618	0.246857	0	0.172589
Nup214	ENSMUSG00000001855	0.316868	0.363376	0	0.310957
Aacs	ENSMUSG00000029482	0.243266	0.302103	0	-0.519925
Vac14	ENSMUSG00000010936	0.243321	0.294929	0	0.162994
Nfatc2	ENSMUSG00000027544	0.323657	0.142227	0	-0.210749
Xpo7	ENSMUSG00000022100	0.328949	0.188231	0	0.300818
Cmas	ENSMUSG00000030282	0.307288	0.302103	0	0.0491381
Phf20	ENSMUSG00000038116	0.450523	0.232804	0	-0.113015
Lrch1	ENSMUSG00000068015	0.359961	0.111027	0	-0.107764
Wdr26	ENSMUSG00000038733	0.356661	0.219406	0	-0.574553
Wdr70	ENSMUSG00000039828	0.389188	0.156459	0	0.350793
Csf2ra	ENSMUSG00000059326	0.203616	0.31724	0	-0.0973247
Ubr4	ENSMUSG00000066036	0.414302	0.20836	0	-0.563079
Mpnd	ENSMUSG00000003199	0.190443	0.243338	0	0.197684
Szrd1	ENSMUSG00000040842	0.428909	0.23694	0	-0.0757763
Pdss2	ENSMUSG00000038240	0.445315	0.176004	0	0.0658273
Dyrk1a	ENSMUSG00000022897	0.414363	0.139661	0	-0.0260109
Hhat	ENSMUSG00000037375	0.304003	0.192252	0	-0.390711
Prkar2b	ENSMUSG00000002997	0.343008	0.132619	0	0.581605
Gna13	ENSMUSG00000020611	0.330577	0.187751	0	-0.418885
Aebp2	ENSMUSG00000030232	0.343784	0.19473	0	0.241979
Snapc3	ENSMUSG00000028483	0.25555	0.277813	0	0.179167
[truncated: 5,836 more rows]

## Sheet: Malaria_UPreg
Gene Symbol	ENSEMBL ID	ChIP-seq c-Maf Score	Motif c-Maf Score	-log10 (BETA score)	-log2 (FC RNA-seq)
Ndc80	ENSMUSG00000024056	0.971371	0.992696	0.960189	0.97007
Mki67	ENSMUSG00000031004	0.982996	0.951719	0.77083	0.771517
Fam83d	ENSMUSG00000027654	0.991581	0.865832	1.25236	0.838488
Kcnk7	ENSMUSG00000024936	0.758147	0.945474	0	1.01103
Pycard	ENSMUSG00000030793	0.939091	0.994564	1.31408	0.852041
H2afx	ENSMUSG00000049932	0.966967	0.880021	1.61529	0.742731
Mrnip	ENSMUSG00000020381	0.924093	0.97335	0	0.603365
Kif18b	ENSMUSG00000051378	0.852842	0.963259	0	0.888989
Cdt1	ENSMUSG00000006585	0.880634	0.997826	1.6562	0.794338
Fbxo5	ENSMUSG00000019773	0.964402	0.90182	0.852324	0.92677
Mad2l1	ENSMUSG00000029910	0.841413	0.991526	0.948847	0.965494
Tmed1	ENSMUSG00000032180	0.716137	0.941154	0	0.737313
Tnfrsf13c	ENSMUSG00000068105	0.756028	0.870432	0	1.63597
Psmd1	ENSMUSG00000026229	0.935969	0.891673	1.03953	0.806358
Pdss1	ENSMUSG00000026784	0.736348	0.92833	0	0.856131
Ppm1g	ENSMUSG00000029147	0.90734	0.951719	1.37243	0.599738
Cdca7	ENSMUSG00000055612	0.787974	0.917459	0	0.654884
Tarsl2	ENSMUSG00000030515	0.883227	0.982131	1.99012	0.625476
Ncapg2	ENSMUSG00000042029	0.703426	0.981685	0	0.937415
Aspm	ENSMUSG00000033952	0.821816	0.880021	0	0.633652
Usp1	ENSMUSG00000028560	0.873415	0.906308	0	0.718394
Cenph	ENSMUSG00000045273	0.807989	0.837538	0	1.08532
Brca1	ENSMUSG00000017146	0.78973	0.870432	0	1.07972
Pole3	ENSMUSG00000028394	0.889945	0.919215	0.751536	0.646634
P4hb	ENSMUSG00000025130	0.867365	0.979873	0	0.694062
Mettl4	ENSMUSG00000055660	0.706492	0.961782	0	0.699755
Rfwd3	ENSMUSG00000033596	0.660023	0.931787	0	0.735508
Mrpl20	ENSMUSG00000029066	0.879561	0.876286	0.977984	0.592003
Rrm1	ENSMUSG00000030978	0.736348	0.949265	0	0.970235
Dsn1	ENSMUSG00000027635	0.710144	0.859532	0	0.786376
Hspa5	ENSMUSG00000026864	0.87347	0.880021	1.30199	0.664514
Cycs	ENSMUSG00000063694	0.691997	0.911452	0	0.660669
Anln	ENSMUSG00000036777	0.778329	0.923815	0	0.890886
Rbbp8	ENSMUSG00000041238	0.775904	0.963259	0	0.777201
Il1rl1	ENSMUSG00000026069	0.937223	0.850751	0	1.39555
Etfa	ENSMUSG00000032314	0.704485	0.987093	0	0.585683
Calr	ENSMUSG00000003814	0.854515	0.891673	1.91186	0.922847
Hmga1	ENSMUSG00000046711	0.953977	0.870432	0.784627	0.708269
Ranbp1	ENSMUSG00000005732	0.725671	0.985114	0	0.798426
Spcs2	ENSMUSG00000035227	0.934101	0.884788	3.13531	0.756168
Kifc1	ENSMUSG00000079553	0.834611	0.884788	1.29217	0.999532
Sike1	ENSMUSG00000027854	0.607281	0.937836	0	0.648801
Txnl1	ENSMUSG00000024583	0.799961	0.897249	0	0.612832
Alg3	ENSMUSG00000033809	0.804588	0.934909	0	0.690364
Fkbp2	ENSMUSG00000056629	0.863519	0.920302	1.19233	1.20369
Nedd1	ENSMUSG00000019988	0.84289	0.870432	1.4045	0.702219
Suv39h2	ENSMUSG00000026646	0.769409	0.923815	0	0.98373
Rps27l	ENSMUSG00000036781	0.711036	0.951105	0	0.822057
Klrc1	ENSMUSG00000030167	0.927438	0.318624	3.49867	3.39338
Birc5	ENSMUSG00000017716	0.767708	0.931787	0	1.10517
Sigmar1	ENSMUSG00000036078	0.740222	0.941154	0	0.61152
Prelid3b	ENSMUSG00000016257	0.649374	0.865832	0	0.709954
Chst12	ENSMUSG00000036599	0.963306	0.311636	1.99268	1.45564
Sephs2	ENSMUSG00000049091	0.767485	0.906308	0	0.840605
Zmynd19	ENSMUSG00000026974	0.63407	0.963259	0	0.79644
Ccnf	ENSMUSG00000072082	0.768154	0.891673	0	0.942751
Caap1	ENSMUSG00000028578	0.729964	0.880021	0	0.612082
Vim	ENSMUSG00000026728	0.751362	0.790522	1.7607	1.38386
Rfc4	ENSMUSG00000022881	0.612661	0.891673	0	1.06286
Pold2	ENSMUSG00000020471	0.749003	0.931787	0	0.785326
Hist1h1d	ENSMUSG00000052565	0.987985	0.49101	2.96738	1.17685
Lmnb2	ENSMUSG00000062075	0.804282	0.859532	0	0.619784
Nucks1	ENSMUSG00000026434	0.728988	0.837538	0	0.73205
Siva1	ENSMUSG00000064326	0.653611	0.880021	0	1.03532
Ints7	ENSMUSG00000037461	0.83112	0.681348	1.54061	0.58534
Rogdi	ENSMUSG00000022540	0.607281	0.98609	0	0.643695
Sac3d1	ENSMUSG00000024790	0.742759	0.899869	0	0.770338
Mrps22	ENSMUSG00000032459	0.837636	0.429766	0.832092	0.643054
Fam213a	ENSMUSG00000021792	0.649688	0.490062	0	1.2642
Il2rb	ENSMUSG00000068227	0.918894	0.464165	2.67428	0.884457
Arhgap33	ENSMUSG00000036882	0.649737	0.906308	0	0.70709
Mphosph6	ENSMUSG00000031843	0.690045	0.92833	0	0.626024
Nusap1	ENSMUSG00000027306	0.614418	0.850751	0	0.964548
Cep89	ENSMUSG00000023072	0.667522	0.884788	0	0.672295
Spc25	ENSMUSG00000005233	0.654559	0.891673	0	1.0375
Casp3	ENSMUSG00000031628	0.864262	0.32445	3.37924	0.924088
H2afz	ENSMUSG00000037894	0.870111	0.429766	1.74836	0.916564
Pdia4	ENSMUSG00000025823	0.726139	0.692666	2.27959	1.15935
Serpinb9	ENSMUSG00000045827	0.580123	0.686951	0	1.56241
Afg3l1	ENSMUSG00000031967	0.740111	0.492404	0	0.699371
Mettl1	ENSMUSG00000006732	0.671354	0.474633	0	0.606534
Cisd3	ENSMUSG00000078695	0.803696	0.496418	1.49107	0.942567
Ccr8	ENSMUSG00000042262	0.843355	0.279179	1.58419	0.875206
Ifi211	ENSMUSG00000026536	0.463385	0.458729	0	1.54072
Tuba4a	ENSMUSG00000026202	0.896747	0.478675	0	0.598595
Erh	ENSMUSG00000021131	0.676972	0.601214	0	0.640488
Nup93	ENSMUSG00000032939	0.481058	0.453154	0	0.763294
Ap3m1	ENSMUSG00000021824	0.453572	0.916609	1.89313	0.619064
Ckap5	ENSMUSG00000040549	0.719009	0.589859	0	0.683586
Akap1	ENSMUSG00000018428	0.564473	0.615876	0	0.714927
Hk2	ENSMUSG00000000628	0.670598	0.342423	1.99482	1.25031
Mt3	ENSMUSG00000031760	0.467622	0.48163	1.07557	2.4051
Apip	ENSMUSG00000010911	0.304895	0.899144	0	0.657215
Hip1	ENSMUSG00000039959	0.423842	0.484863	0	1.18177
Desi2	ENSMUSG00000026502	0.245449	0.645276	0	0.602405
Cdca8	ENSMUSG00000028873	0.395576	0.902545	0	0.94347
Zbtb32	ENSMUSG00000006310	0.64067	0.246258	1.10774	1.5474
Gm15232	ENSMUSG00000084806	0.670107	0.23793	0	0.973994
Hist1h2bc	ENSMUSG00000018102	0.462088	0.425376	2.45482	1.2666
Tars	ENSMUSG00000022241	0.434157	0.472737	1.5382	0.589317
1700066B19Rik	ENSMUSG00000073598	0.541968	0.642201	0	1.68145
Sec24d	ENSMUSG00000039234	0.310113	0.873126	1.09367	1.13605
Plk1	ENSMUSG00000030867	0.751726	0.33194	1.08197	1.22733
Lsp1	ENSMUSG00000018819	0.59804	0.488306	1.27976	0.60854
Map2k3	ENSMUSG00000018932	0.549334	0.4559	0	0.604654
Lamc1	ENSMUSG00000026478	0.543773	0.209285	1.60119	1.21145
Zfp367	ENSMUSG00000044934	0.71965	0.328195	0	0.836725
Pde8a	ENSMUSG00000025584	0.573663	0.294929	0	0.835404
Chsy1	ENSMUSG00000032640	0.632258	0.234013	2.21645	1.59161
Nabp1	ENSMUSG00000026107	0.936298	0.141792	1.48426	0.652135
Gpr160	ENSMUSG00000037661	0.295347	0.189552	1.5187	1.97692
Tpst1	ENSMUSG00000034118	0.66809	0.169041	1.48732	1.14388
Mrpl1	ENSMUSG00000029486	0.66111	0.234905	2.67965	0.59392
1500009L16Rik	ENSMUSG00000087651	0.386795	0.463454	0	1.93082
Bhlhe40	ENSMUSG00000030103	0.459064	0.232947	2.26664	0.962731
Anxa11	ENSMUSG00000021866	0.659521	0.13959	0	0.589726
Mlkl	ENSMUSG00000012519	0.437571	0.488557	1.68194	1.48086
Tfdp1	ENSMUSG00000038482	0.306814	0.632221	0	0.785064
Haspin	ENSMUSG00000050107	0.483051	0.496836	0	0.677853
Dpy19l1	ENSMUSG00000043067	0.220268	0.608499	0	1.15266
Sla2	ENSMUSG00000027636	0.429933	0.37703	0	0.65983
Cit	ENSMUSG00000029516	0.518756	0.628263	0	0.704431
Plp2	ENSMUSG00000031146	0.579247	0.297224	1.70974	0.948927
Lrrc8b	ENSMUSG00000070639	0.463064	0.485044	0.905878	0.679697
Ehd4	ENSMUSG00000027293	0.720681	0.294929	0	0.603668
Il18r1	ENSMUSG00000026070	0.491185	0.398644	0	0.676368
Gimap7	ENSMUSG00000043931	0.58603	0.320185	3.09713	0.637986
Fam3c	ENSMUSG00000029672	0.658113	0.3106	0	0.633819
Gnb1l	ENSMUSG00000000884	0.687774	0.467455	0	0.680575
Alcam	ENSMUSG00000022636	0.297468	0.320048	0	0.687388
Icosl	ENSMUSG00000000732	0.152712	0.697063	0	1.05331
Tacc2	ENSMUSG00000030852	0.713629	0.222918	0	1.30633
Gas2	ENSMUSG00000030498	0.534339	0.221315	0	0.991993
Tmem163	ENSMUSG00000026347	0.471945	0.184179	0	0.731826
Cpox	ENSMUSG00000022742	0.336158	0.41672	0	0.922357
Mfsd2a	ENSMUSG00000028655	0.591661	0.283584	0	1.11346
Grb7	ENSMUSG00000019312	0.310196	0.60271	0	1.87104
Paqr4	ENSMUSG00000023909	0.681278	0.429766	0	0.979114
Uchl5	ENSMUSG00000018189	0.486675	0.41672	0.767004	0.586742
Phf11a	ENSMUSG00000044703	0.270064	0.300607	0	1.19173
Dusp22	ENSMUSG00000069255	0.688016	0.181262	1.37417	1.02659
Srsf4	ENSMUSG00000028911	0.550144	0.316812	0	0.585843
AW112010	ENSMUSG00000075010	0.541521	0.363376	1.75721	0.762848
Stil	ENSMUSG00000028718	0.368174	0.485923	0	0.9906
4930486L24Rik	ENSMUSG00000050345	0.17601	0.440526	0	1.6843
Mrps28	ENSMUSG00000040269	0.61065	0.161681	0.848937	0.669361
4930427A07Rik	ENSMUSG00000037466	0.442046	0.442394	0.990549	1.05415
Crybg3	ENSMUSG00000091562	0.376446	0.220005	0	0.699354
Slfn3	ENSMUSG00000018986	0.583243	0.288611	1.60241	0.693913
St6galnac6	ENSMUSG00000026811	0.542548	0.325268	0	0.960996
Tonsl	ENSMUSG00000059323	0.448736	0.432916	0	0.654961
Zranb3	ENSMUSG00000036086	0.498966	0.17945	0	0.874053
Ccp110	ENSMUSG00000033904	0.462632	0.418769	0.98632	0.846448
Phf11b	ENSMUSG00000091649	0.318773	0.300607	1.46954	0.840779
Tmem143	ENSMUSG00000002781	0.631097	0.302103	0	0.620521
Acadl	ENSMUSG00000026003	0.301694	0.31592	0	0.767243
Gm14005	ENSMUSG00000074813	0.457713	0.210946	4.13751	0.852784
Ska3	ENSMUSG00000021965	0.386349	0.460151	0	1.08668
Txn1	ENSMUSG00000028367	0.188059	0.46089	0	0.859064
Slc15a3	ENSMUSG00000024737	0.684672	0.237776	2.49499	1.14329
Tex15	ENSMUSG00000009628	0.50479	0.281735	0	0.680546
Chd7	ENSMUSG00000041235	0.55848	0.205582	0	0.619147
Pqlc3	ENSMUSG00000045679	0.406378	0.445837	0	0.695379
Racgap1	ENSMUSG00000023015	0.320473	0.6409	0	0.926474
Hlf	ENSMUSG00000003949	0.130502	0.473583	0	1.64163
Kcnk5	ENSMUSG00000023243	0.290246	0.321554	0	0.611834
Lpgat1	ENSMUSG00000026623	0.368906	0.226577	0	0.99459
Lfng	ENSMUSG00000029570	0.705684	0.160543	0	0.735338
Rad50	ENSMUSG00000020380	0.525677	0.188799	0	0.587977
Mcm6	ENSMUSG00000026355	0.569044	0.302103	2.29516	0.654741
Krtcap2	ENSMUSG00000042747	0.52749	0.325918	0	0.733315
Lrrk1	ENSMUSG00000015133	0.207907	0.287203	1.46332	2.3149
Itgae	ENSMUSG00000005947	0.476323	0.124233	0	1.04003
Tspan2	ENSMUSG00000027858	0.358693	0.167508	1.59602	0.955766
Ptch1	ENSMUSG00000021466	0.438868	0.302907	0	0.89098
Vcl	ENSMUSG00000021823	0.404754	0.240445	0	1.29746
Zfand4	ENSMUSG00000042213	0.380509	0.226577	0.852324	1.07644
Hsp90aa1	ENSMUSG00000021270	0.459359	0.375318	0	0.648913
Ankle1	ENSMUSG00000046295	0.490202	0.283584	0	0.609654
Cox6a1	ENSMUSG00000041697	0.34873	0.480891	0	0.606585
Hus1	ENSMUSG00000020413	0.410462	0.480891	0	0.664163
Cox5a	ENSMUSG00000000088	0.388955	0.478675	0	0.7275
Cmtm7	ENSMUSG00000032436	0.404719	0.276015	0	1.11965
Gfod1	ENSMUSG00000051335	0.383479	0.193175	0	0.681866
Pkig	ENSMUSG00000035268	0.231102	0.556993	0	0.671043
Snd1	ENSMUSG00000001424	0.439941	0.234783	2.21667	0.587063
Glipr2	ENSMUSG00000028480	0.449419	0.195198	0	0.825211
Mcm5	ENSMUSG00000005410	0.32728	0.418769	0	1.10901
Mical2	ENSMUSG00000038244	0.288216	0.443133	0	1.17822
Il2ra	ENSMUSG00000026770	0.510969	0.0757673	0	1.67352
Fam71b	ENSMUSG00000020401	0.516312	0.307938	0	0.856092
Pspc1	ENSMUSG00000021938	0.304756	0.425376	0	0.641504
Pde5a	ENSMUSG00000053965	0.332074	0.442394	0	1.46754
Arid3a	ENSMUSG00000019564	0.503047	0.388086	0	0.705486
Gpld1	ENSMUSG00000021340	0.327779	0.171906	0	0.62607
Stk32c	ENSMUSG00000015981	0.0808583	0.234943	0	2.54078
Kif20b	ENSMUSG00000024795	0.477894	0.432916	0	0.679364
St3gal6	ENSMUSG00000022747	0.490042	0.139432	0	0.860097
Degs1	ENSMUSG00000038633	0.461508	0.31724	0	0.672097
Dscc1	ENSMUSG00000022422	0.311334	0.425376	0	1.17271
Nup43	ENSMUSG00000040034	0.363574	0.48163	0	0.733446
Adap1	ENSMUSG00000056413	0.238802	0.235943	0	1.39544
Lsm5	ENSMUSG00000091625	0.35294	0.453154	0	0.79878
Timeless	ENSMUSG00000039994	0.318777	0.429766	0	0.857538
Tg	ENSMUSG00000053469	0.467167	0.182757	0	1.87451
Xkr5	ENSMUSG00000039814	0.50886	0.290144	0	1.32559
Prpf19	ENSMUSG00000024735	0.314275	0.453154	0	0.653753
Adam19	ENSMUSG00000011256	0.385726	0.130572	0	0.979586
Fam129a	ENSMUSG00000026483	0.354161	0.0962911	0	0.730338
Hsf4	ENSMUSG00000033249	0.314275	0.449934	2.96138	0.938196
Fbxo48	ENSMUSG00000044966	0.234773	0.209385	3.08465	1.47072
Sult2b1	ENSMUSG00000003271	0.389508	0.150303	0	0.663037
Lamb3	ENSMUSG00000026639	0.398617	0.183113	0	1.84891
Map3k8	ENSMUSG00000024235	0.368639	0.368188	1.58754	0.65058
Mbnl1	ENSMUSG00000027763	0.39319	0.199181	0	0.62506
Entpd1	ENSMUSG00000048120	0.312624	0.171468	2.6811	0.648899
Mgat4a	ENSMUSG00000026110	0.536154	0.107029	0	0.60372
Spag1	ENSMUSG00000037617	0.264814	0.331113	0	0.876441
Mms22l	ENSMUSG00000045751	0.582304	0.243038	0	0.808585
Clybl	ENSMUSG00000025545	0.324558	0.13637	1.67101	0.647308
Blm	ENSMUSG00000030528	0.286139	0.279179	0.883392	1.02903
Cdc7	ENSMUSG00000029283	0.381345	0.465894	0	0.644554
Ankrd55	ENSMUSG00000049985	0.216365	0.211285	1.75572	1.02883
Adarb2	ENSMUSG00000052551	0.454646	0.292843	0	0.763749
Nup210	ENSMUSG00000030091	0.510088	0.189315	2.40894	0.604841
Arhgdia	ENSMUSG00000025132	0.386725	0.460151	0	0.610287
Kcnab2	ENSMUSG00000028931	0.326564	0.265087	1.62599	0.761041
Txndc5	ENSMUSG00000038991	0.21459	0.226577	1.65837	1.13171
Itga4	ENSMUSG00000027009	0.272833	0.29334	0	0.808896
Ezh2	ENSMUSG00000029687	0.432126	0.286511	0	0.686516
Padi2	ENSMUSG00000028927	0.409937	0.13959	0	1.14871
Runx3	ENSMUSG00000070691	0.300286	0.235182	0	0.754542
Tnfsf10	ENSMUSG00000039304	0.17679	0.36482	1.18204	0.895901
Trpm1	ENSMUSG00000030523	0.0822574	0.405757	0	0.659099
Nek6	ENSMUSG00000026749	0.206576	0.24646	0	1.4532
Fam129b	ENSMUSG00000026796	0.433	0.163898	0	1.93472
Smpdl3b	ENSMUSG00000028885	0.191397	0.244007	0	1.66011
1700025G04Rik	ENSMUSG00000032666	0.375378	0.264264	0	0.787982
Odf2l	ENSMUSG00000028256	0.348307	0.335015	0	0.657241
Rfc3	ENSMUSG00000033970	0.208727	0.324246	0	0.891678
Impa2	ENSMUSG00000024525	0.386405	0.145072	0	0.68702
Zmiz1	ENSMUSG00000007817	0.475464	0.110189	0	0.731753
Sv2c	ENSMUSG00000051111	0.278392	0.272564	0	0.896589
Cdk2ap1	ENSMUSG00000029394	0.36678	0.245073	0	0.69684
Coro2a	ENSMUSG00000028337	0.207421	0.296489	0	1.25464
Fkbp5	ENSMUSG00000024222	0.414451	0.190294	1.27116	0.81646
2310031A07Rik	ENSMUSG00000097457	0.227664	0.283584	0	0.801851
Rpa2	ENSMUSG00000028884	0.173599	0.235288	0	1.18389
Gzmk	ENSMUSG00000042385	0.205846	0.23464	1.47121	1.75697
Ywhae	ENSMUSG00000020849	0.388955	0.435216	0	0.627012
Hic1	ENSMUSG00000043099	0.450779	0.199972	1.78755	0.94129
Rhoq	ENSMUSG00000024143	0.443781	0.226577	0.875496	1.14217
Osbpl3	ENSMUSG00000029822	0.31728	0.144425	0	1.08058
Dclk2	ENSMUSG00000028078	0.251354	0.169385	0	0.670946
Myo1f	ENSMUSG00000024300	0.28088	0.185666	0	0.992745
Wscd2	ENSMUSG00000063430	0.128342	0.246209	0	0.729311
Rora	ENSMUSG00000032238	0.395097	0.0831084	0	0.649713
Slc30a4	ENSMUSG00000005802	0.309857	0.461907	0	0.661467
Dennd1b	ENSMUSG00000056268	0.440871	0.106344	0	0.607104
Sms	ENSMUSG00000071708	0.130474	0.151051	0	0.72965
Slco4a1	ENSMUSG00000038963	0.218186	0.288611	0	1.19811
Prep	ENSMUSG00000019849	0.204295	0.302103	0	0.87101
Uso1	ENSMUSG00000029407	0.30569	0.48163	0	0.590231
Ehbp1l1	ENSMUSG00000024937	0.344068	0.229365	0	0.780928
Nhsl2	ENSMUSG00000079481	0.339384	0.135068	0	1.15412
Pbx3	ENSMUSG00000038718	0.139868	0.164358	0	1.04234
Itga1	ENSMUSG00000042284	0.0916985	0.228814	0	0.846256
Nrgn	ENSMUSG00000053310	0.235377	0.311636	0	2.27757
Ptgir	ENSMUSG00000043017	0.174794	0.373244	0.718285	0.78813
Selenoi	ENSMUSG00000075703	0.204074	0.211301	0	1.04568
Dgkh	ENSMUSG00000034731	0.194928	0.158733	0	0.652741
2011-09-01	ENSMUSG00000058013	0.218382	0.168496	1.14406	1.02017
Ppp3ca	ENSMUSG00000028161	0.211728	0.136316	0	0.921065
Ttc7	ENSMUSG00000036918	0.426576	0.100701	1.65482	0.76082
Fanca	ENSMUSG00000032815	0.105678	0.147465	0	0.866645
Uck2	ENSMUSG00000026558	0.251864	0.26239	0	0.88363
Lrrc8c	ENSMUSG00000054720	0.222033	0.113289	2.16539	0.783412
Tns2	ENSMUSG00000037003	0.278859	0.165905	0	1.53131
Tex2	ENSMUSG00000040548	0.317007	0.120613	0	0.900084
Fanci	ENSMUSG00000039187	0.45222	0.144305	1.4193	0.843938
Atp8b4	ENSMUSG00000060131	0.224083	0.153481	1.05715	1.21875
Palm	ENSMUSG00000035863	0.211357	0.329505	0	1.35341
Reck	ENSMUSG00000028476	0.186218	0.190221	0	0.698009
Phldb1	ENSMUSG00000048537	0.452244	0.151326	0	0.694733
Akt1	ENSMUSG00000001729	0.260965	0.195205	0	0.596844
Gm17018	ENSMUSG00000041035	0.1601	0.238968	0	0.694714
Exph5	ENSMUSG00000034584	0.106584	0.147465	0	0.988924
Pdcd1lg2	ENSMUSG00000016498	0.387569	0.10565	0	0.723434
Mindy3	ENSMUSG00000026767	0.212709	0.230954	0	0.67207
Gorasp2	ENSMUSG00000014959	0.281623	0.279179	1.48785	0.602765
Tbc1d2	ENSMUSG00000039813	0.0852926	0.0870432	0	2.28181
Phgdh	ENSMUSG00000053398	0.273197	0.190344	0	0.855221
Ulbp1	ENSMUSG00000079685	0.201145	0.290144	0	0.894196
Diaph3	ENSMUSG00000022021	0.190138	0.278918	0	0.91229
Atp6v0d2	ENSMUSG00000028238	0.181892	0.356608	0.872895	1.69078
Mxi1	ENSMUSG00000025025	0.221023	0.0814796	1.4939	0.603682
Prex1	ENSMUSG00000039621	0.198391	0.195705	0	0.651058
Txnrd1	ENSMUSG00000020250	0.358295	0.10299	1.56241	0.684448
Hip1r	ENSMUSG00000000915	0.161464	0.17015	0	0.919062
Pola2	ENSMUSG00000024833	0.276791	0.313718	0	0.771501
B4galt5	ENSMUSG00000017929	0.301014	0.127382	0	0.859759
Ctif	ENSMUSG00000052928	0.278577	0.133987	0	0.759903
Lysmd2	ENSMUSG00000032184	0.15812	0.238376	0	1.0063
Megf9	ENSMUSG00000039270	0.222549	0.214883	1.7029	0.975258
Slc25a33	ENSMUSG00000028982	0.151836	0.17015	0	1.10553
Axl	ENSMUSG00000002602	0.261037	0.140867	0	0.741604
Mtch1	ENSMUSG00000024012	0.150663	0.243338	0	0.681878
Dclk1	ENSMUSG00000027797	0.164999	0.227162	3.15163	2.49015
Prelid2	ENSMUSG00000056671	0.106951	0.296165	0	0.805124
Rap1gap2	ENSMUSG00000038807	0.0773562	0.114322	0	1.16602
Eri1	ENSMUSG00000031527	0.172511	0.226577	0	0.730929
Camkk2	ENSMUSG00000029471	0.163124	0.230954	0	0.586721
Rad51b	ENSMUSG00000059060	0.128207	0.101478	0	0.845318
Sh3bp4	ENSMUSG00000036206	0.237607	0.123175	2.8041	0.886421
Pde4a	ENSMUSG00000032177	0.270978	0.0906308	0	1.17619
Dennd4a	ENSMUSG00000053641	0.105049	0.140611	0	0.652295
Osbpl1a	ENSMUSG00000044252	0.132244	0.288462	0	0.722069
Anxa6	ENSMUSG00000018340	0.238962	0.133383	0	1.01675
1700017B05Rik	ENSMUSG00000032300	0.134876	0.167508	0	0.803456
Mad1l1	ENSMUSG00000029554	0.254855	0.131472	0.902743	0.655236
Chn2	ENSMUSG00000004633	0.10415	0.1159	0	1.26746
Gmds	ENSMUSG00000038372	0.265878	0.129473	0	0.67464
Aven	ENSMUSG00000003604	0.0866634	0.216336	0	0.602181
Rapgef5	ENSMUSG00000041992	0.137178	0.136338	0	0.84821
Cep128	ENSMUSG00000061533	0.165162	0.069716	0	0.635955
Sestd1	ENSMUSG00000042272	0.122304	0.124347	0	1.08338
Man1c1	ENSMUSG00000037306	0.0603434	0.0837538	0	0.983936
Gm17055	ENSMUSG00000090576	0.988905	0	0	0.644915
Gpsm2	ENSMUSG00000027883	0.824641	0	0	0.899756
Ctla2b	ENSMUSG00000074874	0.830053	0	1.32459	1.9522
Havcr2	ENSMUSG00000020399	0.648392	0	0	1.37617
Hsp90b1	ENSMUSG00000020048	0.99423	0	1.43321	1.21407
Ctla2a	ENSMUSG00000044258	0.736501	0	0	1.59385
Tubb5	ENSMUSG00000001525	0.997073	0	2.61404	0.727542
S100a10	ENSMUSG00000041959	0.819725	0	1.68131	0.611415
Dnmt1	ENSMUSG00000004099	0.903855	0	1.0864	0.746395
Fam124b	ENSMUSG00000043230	0.800351	0	0	1.19334
Dusp2	ENSMUSG00000027368	0.929794	0	2.26624	1.00446
Rdm1	ENSMUSG00000010362	0.978647	0	2.1156	0.614484
Kbtbd6	ENSMUSG00000075502	0.667299	0	0	0.747961
Fam46a	ENSMUSG00000032265	0.94698	0	0	1.61289
Aars	ENSMUSG00000031960	0.908037	0	1.63246	0.616348
Nme6	ENSMUSG00000032478	0.892175	0	1.31489	0.935537
Tuba1a	ENSMUSG00000072235	0.929696	0	0	0.833153
Tipin	ENSMUSG00000032397	0.858348	0	1.69919	1.18304
Gabarapl1	ENSMUSG00000030161	0.857191	0	0	0.632422
Pelo	ENSMUSG00000042275	0.933376	0	1.31758	0.863634
Rgs16	ENSMUSG00000026475	0.747303	0	0	1.99523
Pdia3	ENSMUSG00000027248	0.878507	0	1.66535	0.938779
Pold3	ENSMUSG00000030726	0.830374	0	0	0.642774
Hdlbp	ENSMUSG00000034088	0.87715	0	0.982132	0.649205
Mis18bp1	ENSMUSG00000047534	0.918016	0	0.951947	0.919546
Calm1	ENSMUSG00000001175	0.92171	0	1.92118	0.621915
Nap1l1	ENSMUSG00000058799	0.905723	0	1.37008	0.677055
Topbp1	ENSMUSG00000032555	0.893374	0	1.19538	0.745699
Fgl2	ENSMUSG00000039899	0.750272	0	1.10863	0.772401
Gins3	ENSMUSG00000031669	0.806149	0	0	0.854931
Brca2	ENSMUSG00000041147	0.823628	0	0	1.03048
Ddx20	ENSMUSG00000027905	0.862097	0	0	0.682914
Gem	ENSMUSG00000028214	0.856717	0	1.12136	0.956197
C1qbp	ENSMUSG00000018446	0.92086	0	0.77237	0.652958
Rad51ap1	ENSMUSG00000030346	0.776489	0	0	1.06349
Ctsc	ENSMUSG00000030560	0.869791	0	1.35625	0.710364
D16Ertd472e	ENSMUSG00000022864	0.711977	0	2.63979	0.617346
Atp1a1	ENSMUSG00000033161	0.882112	0	0	0.660643
Hexim2	ENSMUSG00000043372	0.911382	0	1.27761	0.591193
Dek	ENSMUSG00000021377	0.869763	0	0	0.725348
Tube1	ENSMUSG00000019845	0.934937	0	0.953115	0.879206
Arhgap11a	ENSMUSG00000041219	0.823377	0	0	0.787884
Slc7a5	ENSMUSG00000040010	0.781172	0	0	1.15033
Sgo1	ENSMUSG00000023940	0.873833	0	0	0.888168
Uhrf1	ENSMUSG00000001228	0.679731	0	0	1.0334
Nme1	ENSMUSG00000037601	0.875673	0	0.83357	0.95335
Atp2a2	ENSMUSG00000029467	0.964263	0	1.15577	0.663251
Manf	ENSMUSG00000032575	0.875254	0	1.68089	1.17267
Leo1	ENSMUSG00000042487	0.876146	0	1.94692	0.595302
E2f1	ENSMUSG00000027490	0.836507	0	0	0.810597
Canx	ENSMUSG00000020368	0.88122	0	1.18923	0.83656
Apitd1	ENSMUSG00000073705	0.801215	0	0	1.17855
Itih5	ENSMUSG00000025780	0.867951	0	1.37141	0.775357
Lrrc59	ENSMUSG00000020869	0.896747	0	1.07212	1.01155
C330027C09Rik	ENSMUSG00000033031	0.836339	0	1.3091	1.18433
Lgals1	ENSMUSG00000068220	0.761185	0	1.06636	1.46008
Dna2	ENSMUSG00000036875	0.726507	0	0	1.14483
G3bp1	ENSMUSG00000018583	0.894517	0	1.1043	0.728014
Sec61a1	ENSMUSG00000030082	0.793772	0	0	0.691711
Ebi3	ENSMUSG00000003206	0.603434	0	0	0.654063
Tsfm	ENSMUSG00000040521	0.892761	0	1.13763	0.749781
Dut	ENSMUSG00000027203	0.836534	0	0	1.09656
Rad51	ENSMUSG00000027323	0.837064	0	0	1.18958
Xbp1	ENSMUSG00000020484	0.968138	0	2.12814	0.669257
Ipp	ENSMUSG00000028696	0.827029	0	0	0.627977
Myo1g	ENSMUSG00000020437	0.745872	0	1.12651	0.604091
E2f8	ENSMUSG00000046179	0.720821	0	0	1.18311
Aurka	ENSMUSG00000027496	0.810192	0	0	1.08141
Slc25a24	ENSMUSG00000040322	0.602152	0	0	0.630938
Lilrb4a	ENSMUSG00000062593	0.267425	0	0	0.626016
Alyref	ENSMUSG00000025134	0.795417	0	0	0.758959
Snrnp35	ENSMUSG00000029402	0.93962	0	1.78915	0.767178
Ppih	ENSMUSG00000060288	0.804282	0	0	0.872768
Tmem101	ENSMUSG00000020921	0.860341	0	1.1446	0.58907
Coq3	ENSMUSG00000028247	0.769409	0	0	0.655054
Cks2	ENSMUSG00000062248	0.856884	0	1.42044	0.811876
Smtn	ENSMUSG00000020439	0.685251	0	0	0.904832
Cnot9	ENSMUSG00000026174	0.839852	0	0	0.670361
Dpy30	ENSMUSG00000024067	0.833607	0	1.38711	0.834453
Nup35	ENSMUSG00000026999	0.796825	0	0	0.909667
Tubb4b	ENSMUSG00000036752	0.85142	0	1.26745	1.16254
Siah1b	ENSMUSG00000040749	0.807683	0	0	1.10434
Rfc5	ENSMUSG00000029363	0.765813	0	0	1.0088
Timm17a	ENSMUSG00000062580	0.759234	0	0	0.64179
Rcc1	ENSMUSG00000028896	0.759791	0	0	0.9121
Ercc6l	ENSMUSG00000051220	0.786357	0	0	0.875965
Plpp2	ENSMUSG00000052151	0.785438	0	0	1.18971
Abhd5	ENSMUSG00000032540	0.792657	0	0	0.616903
Clspn	ENSMUSG00000042489	0.685251	0	0	1.05514
Nfxl1	ENSMUSG00000072889	0.824994	0	0	0.853891
Smc2	ENSMUSG00000028312	0.793438	0	0	0.964043
Mtrf1	ENSMUSG00000022022	0.847295	0	1.61208	0.599369
Cbx5	ENSMUSG00000009575	0.770134	0	1.31515	0.724753
Nutf2	ENSMUSG00000008450	0.798985	0	0	0.643746
Tex30	ENSMUSG00000026049	0.797034	0	0	0.625854
Spdl1	ENSMUSG00000069910	0.866139	0	0.991826	1.07621
Saal1	ENSMUSG00000006763	0.864383	0	1.86614	0.741839
Mybl1	ENSMUSG00000025912	0.688429	0	0	1.12071
Ssrp1	ENSMUSG00000027067	0.84289	0	1.67448	0.972874
Rtca	ENSMUSG00000000339	0.737435	0	0	0.604058
Asns	ENSMUSG00000029752	0.716137	0	0	1.65308
Pclaf	ENSMUSG00000040204	0.670393	0	0	1.19038
Gpr65	ENSMUSG00000021886	0.663322	0	2.31524	0.888611
Ccdc51	ENSMUSG00000025645	0.734759	0	0	0.67638
Adss	ENSMUSG00000015961	0.812254	0	0	0.643674
Cenpu	ENSMUSG00000031629	0.864425	0	1.3026	0.727435
Sass6	ENSMUSG00000027959	0.793466	0	0	0.817809
Chst2	ENSMUSG00000033350	0.80732	0	0	0.873982
Incenp	ENSMUSG00000024660	0.834611	0	1.04861	0.743497
Fignl1	ENSMUSG00000035455	0.798781	0	2.02415	1.01462
Cenpp	ENSMUSG00000021391	0.593643	0	0	0.878134
Polr3k	ENSMUSG00000038628	0.788225	0	0	0.836132
Gtf3a	ENSMUSG00000016503	0.732334	0	0	0.637406
Mxd3	ENSMUSG00000021485	0.760948	0	0	1.07071
A430005L14Rik	ENSMUSG00000047613	0.725615	0	0	0.69802
Eif3b	ENSMUSG00000056076	0.839573	0	0	0.618049
Wdr90	ENSMUSG00000073434	0.801215	0	0	0.72794
Ctps	ENSMUSG00000028633	0.73094	0	0	0.894943
Hells	ENSMUSG00000025001	0.658044	0	0	1.19231
Kif2c	ENSMUSG00000028678	0.722995	0	0	0.99205
Crybg3	ENSMUSG00000022723	0.653546	0	0	0.622337
Prune1	ENSMUSG00000015711	0.781674	0	0	0.634551
Ppat	ENSMUSG00000029246	0.815516	0	0	0.769202
Tmem107	ENSMUSG00000020895	0.778998	0	1.63414	1.22107
Ran	ENSMUSG00000029430	0.757784	0	0	0.826645
Ostc	ENSMUSG00000041084	0.716137	0	0	0.611753
Knstrn	ENSMUSG00000027331	0.725978	0	0	0.74832
Ddias	ENSMUSG00000030641	0.710144	0	0	0.909831
Snrpa1	ENSMUSG00000030512	0.711036	0	0	0.636648
Hnrnpab	ENSMUSG00000020358	0.89014	0	1.45235	0.797175
Shmt2	ENSMUSG00000025403	0.81808	0	0	0.627187
BC030867	ENSMUSG00000034773	0.682993	0	0	1.10147
Ska2	ENSMUSG00000020492	0.846737	0	1.2754	0.790827
Cep76	ENSMUSG00000073542	0.735511	0	0	0.744128
Mcm2	ENSMUSG00000002870	0.772531	0	0	0.834726
Mrpl12	ENSMUSG00000039640	0.847295	0	0.955068	0.665948
Cep55	ENSMUSG00000024989	0.833607	0	1.12442	1.11957
Nek2	ENSMUSG00000026622	0.730633	0	0	1.34372
Pola1	ENSMUSG00000006678	0.661863	0	0	0.790764
Cpd	ENSMUSG00000020841	0.636702	0	1.5373	0.84681
Tmem39a	ENSMUSG00000002845	0.694087	0	0	0.806109
Tuba1c	ENSMUSG00000043091	0.728236	0	0	1.10315
Pwwp2b	ENSMUSG00000060260	0.682993	0	0	0.887815
Gsr	ENSMUSG00000031584	0.697934	0	0	0.90905
Plpp5	ENSMUSG00000031570	0.791347	0	0	0.831711
Tmx1	ENSMUSG00000021072	0.775904	0	0	0.591445
Trdmt1	ENSMUSG00000026723	0.892705	0	2.48162	0.706182
Rad51c	ENSMUSG00000007646	0.869791	0	1.51813	0.78422
Ncaph	ENSMUSG00000034906	0.751652	0	0	0.997496
Gsto1	ENSMUSG00000025068	0.643409	0	0	1.55962
Lmf2	ENSMUSG00000022614	0.672316	0	0	0.65399
Cercam	ENSMUSG00000039787	0.805703	0	0	1.9568
Cyb561	ENSMUSG00000019590	0.647534	0	0	1.13676
Atpif1	ENSMUSG00000054428	0.772057	0	0	0.68996
Tpm4	ENSMUSG00000031799	0.791494	0	0	0.631616
Them6	ENSMUSG00000056665	0.747888	0	0	0.737825
Nudcd2	ENSMUSG00000020328	0.782148	0	0	0.60078
Slc1a4	ENSMUSG00000020142	0.813325	0	0	0.801371
Suz12	ENSMUSG00000017548	0.750815	0	0	0.698913
Znrd1as	ENSMUSG00000036214	0.732891	0	0	0.734777
Shmt1	ENSMUSG00000020534	0.732334	0	0	0.918756
Sumo3	ENSMUSG00000020265	0.619672	0	1.90693	0.652688
Srm	ENSMUSG00000006442	0.640398	0	0	0.818776
Lap3	ENSMUSG00000039682	0.729964	0	0	0.801922
Ttk	ENSMUSG00000038379	0.713461	0	0	0.939901
Tkt	ENSMUSG00000021957	0.658044	0	0	0.624689
Usp46	ENSMUSG00000054814	0.662532	0	0	0.775601
Hn1l	ENSMUSG00000024165	0.782845	0	0	0.680279
Dhrs13	ENSMUSG00000020834	0.737435	0	0	1.17211
Cenpa	ENSMUSG00000029177	0.785354	0	0	0.830692
Ncapg	ENSMUSG00000015880	0.660023	0	0	0.897514
Nrarp	ENSMUSG00000078202	0.757617	0	0	1.27937
Nup160	ENSMUSG00000051329	0.719873	0	0	0.691958
Ckap2	ENSMUSG00000037725	0.704764	0	0	1.04558
Smc3	ENSMUSG00000024974	0.702618	0	0	0.66573
Pimreg	ENSMUSG00000020808	0.701084	0	0	0.669599
Atp5b	ENSMUSG00000025393	0.645973	0	0	0.615014
Tyms	ENSMUSG00000025747	0.705879	0	0	0.772673
Klhdc4	ENSMUSG00000040263	0.783765	0	0	0.592547
Cks1b	ENSMUSG00000028044	0.728236	0	0	1.09145
Impdh2	ENSMUSG00000062867	0.678087	0	0	0.681422
Selenoh	ENSMUSG00000076437	0.662337	0	0	0.663443
Ccz1	ENSMUSG00000029617	0.664511	0	0	0.586098
Ube2c	ENSMUSG00000001403	0.624063	0	0	1.01585
Fabp5	ENSMUSG00000027533	0.677529	0	0	1.28232
Kif14	ENSMUSG00000041498	0.632509	0	0	1.14631
Mycbp	ENSMUSG00000028647	0.654559	0	0	0.736035
Zfp473	ENSMUSG00000048012	0.474438	0	1.64685	0.701356
Ilf2	ENSMUSG00000001016	0.637806	0	0	0.608878
Kpna2	ENSMUSG00000018362	0.701335	0	0	1.01286
1600002H07Rik	ENSMUSG00000024118	0.701837	0	0	0.828011
Ndc1	ENSMUSG00000028614	0.711036	0	0	1.13443
Fzr1	ENSMUSG00000020235	0.735567	0	0	0.692528
Nudt5	ENSMUSG00000025817	0.690045	0	0	0.767422
Atad2	ENSMUSG00000022360	0.719873	0	0	0.744095
Cacna1s	ENSMUSG00000026407	0.320199	0	0	1.29862
Dclre1b	ENSMUSG00000027845	0.639868	0	0	0.6481
Orc1	ENSMUSG00000028587	0.679146	0	0	1.23313
Lman2	ENSMUSG00000021484	0.670393	0	0	0.723635
Suv39h1	ENSMUSG00000039231	0.685251	0	0	0.82157
Cpsf2	ENSMUSG00000041781	0.583707	0	0.928486	0.58678
Stk35	ENSMUSG00000037885	0.671842	0	0	0.60648
Slc33a1	ENSMUSG00000027822	0.651799	0	0	0.671413
Cdk1	ENSMUSG00000019942	0.641708	0	0	1.18786
Mrpl18	ENSMUSG00000057388	0.628551	0	0	0.670034
Zbed4	ENSMUSG00000034333	0.557541	0	0	0.833398
Snrpd1	ENSMUSG00000002477	0.648789	0	0	0.710759
Pcna	ENSMUSG00000027342	0.59614	0	0	0.853156
Golm1	ENSMUSG00000021556	0.531061	0	0	0.937253
Serpinb6b	ENSMUSG00000042842	0.332255	0	0	1.25555
Kifc5b	ENSMUSG00000024301	0.703426	0	0	0.871003
Cyba	ENSMUSG00000006519	0.529182	0	0	0.666542
Pigf	ENSMUSG00000024145	0.649848	0	0	1.03775
Arsb	ENSMUSG00000042082	0.489756	0	0.919013	1.43927
Rdx	ENSMUSG00000032050	0.375659	0	0	0.654232
Spc24	ENSMUSG00000074476	0.647311	0	0	0.975186
Mars	ENSMUSG00000040354	0.662978	0	0	0.645105
Enkd1	ENSMUSG00000013155	0.63407	0	0	0.749643
Cst7	ENSMUSG00000068129	0.53341	0	0	0.793426
Gmnn	ENSMUSG00000006715	0.626181	0	0	1.08134
Bub3	ENSMUSG00000066979	0.695621	0	0	0.653551
Mutyh	ENSMUSG00000028687	0.605191	0	0	0.959941
Mrps14	ENSMUSG00000058267	0.599504	0	0	0.592171
Lman1	ENSMUSG00000041891	0.64759	0	0	0.77877
Prps1	ENSMUSG00000031432	0.654559	0	0	0.607001
Slc35b1	ENSMUSG00000020873	0.646614	0	0	0.891147
Aunip	ENSMUSG00000078521	0.469592	0	0	1.18538
Entpd7	ENSMUSG00000025192	0.664149	0	0	0.632893
Banf1	ENSMUSG00000024844	0.682686	0	0	0.734243
Slamf7	ENSMUSG00000038179	0.34933	0	0	0.723007
Dnajc9	ENSMUSG00000021811	0.626181	0	0	0.683664
Fam110a	ENSMUSG00000027459	0.574006	0	0	0.604006
Dnajc15	ENSMUSG00000022013	0.351442	0	0	1.28885
Dennd5a	ENSMUSG00000035901	0.630014	0	0	0.669628
Vdac3	ENSMUSG00000008892	0.642377	0	0	0.68006
Slc25a10	ENSMUSG00000025792	0.640398	0	0	0.804557
Ak3	ENSMUSG00000024782	0.63407	0	0	0.954003
Aarsd1	ENSMUSG00000075528	0.837399	0	1.1359	0.631725
Hdac2	ENSMUSG00000019777	0.645137	0	0	0.636443
Sephs1	ENSMUSG00000026662	0.72496	0	0	0.957244
Ifitm3	ENSMUSG00000025492	0.464862	0	0	1.70211
Eif5a	ENSMUSG00000078812	0.72195	0	0	0.696154
Cse1l	ENSMUSG00000002718	0.70783	0	0	0.844028
Nup155	ENSMUSG00000022142	0.677529	0	0	0.635261
Plek	ENSMUSG00000020120	0.264564	0	0	0.996671
Hist1h4i	ENSMUSG00000060639	0.466604	0	1.77392	0.940119
Stmn1	ENSMUSG00000028832	0.716054	0	0	0.822666
Sgo2a	ENSMUSG00000026039	0.603434	0	0	0.74085
Nudc	ENSMUSG00000028851	0.638419	0	0	0.660236
Sdf2l1	ENSMUSG00000022769	0.604633	0	1.61618	1.59214
Bard1	ENSMUSG00000026196	0.633652	0	0	1.01856
Snrpa	ENSMUSG00000061479	0.668232	0	0	0.772834
Mcph1	ENSMUSG00000039842	0.563079	0	0	0.5903
Psmc1	ENSMUSG00000021178	0.632955	0	0	0.629101
Ccnd3	ENSMUSG00000034165	0.614552	0	0	0.878724
Yars	ENSMUSG00000028811	0.456569	0	0.789414	0.647877
Pmm1	ENSMUSG00000022474	0.600424	0	0	0.67582
Soat2	ENSMUSG00000023045	0.334576	0	0	0.775798
Pa2g4	ENSMUSG00000025364	0.626962	0	0	0.749441
Aaas	ENSMUSG00000036678	0.519945	0	0	0.757548
Anxa2	ENSMUSG00000032231	0.389185	0	0	1.14998
Eno1	ENSMUSG00000063524	0.578994	0	0	0.69229
Ipo5	ENSMUSG00000030662	0.43608	0	1.13644	0.897428
Ywhah	ENSMUSG00000018965	0.690045	0	0	0.780423
Umps	ENSMUSG00000022814	0.725978	0	0	0.845864
Mthfd2	ENSMUSG00000005667	0.61444	0	0	0.621055
Lgals7	ENSMUSG00000053522	0.642702	0	0	1.00731
Sbk1	ENSMUSG00000042978	0.582085	0	0	0.627699
Gmps	ENSMUSG00000027823	0.609511	0	0	0.613522
Ube2s	ENSMUSG00000060860	0.581868	0	0	0.644562
Esyt1	ENSMUSG00000025366	0.598575	0	1.78383	0.90931
Pcyox1l	ENSMUSG00000024579	0.477602	0	1.46407	0.692672
Haus5	ENSMUSG00000078762	0.664511	0	0	0.631749
Serf1	ENSMUSG00000021643	0.414197	0	0	0.982522
Cd48	ENSMUSG00000015355	0.52002	0	0	1.08389
Cbwd1	ENSMUSG00000024878	0.652496	0	0	0.888556
Mid1ip1	ENSMUSG00000008035	0.326834	0	0	0.652645
Pole	ENSMUSG00000007080	0.344214	0	1.13159	0.821431
Slbp	ENSMUSG00000004642	0.542581	0	0	0.854899
Itgb7	ENSMUSG00000001281	0.570195	0	0	0.619886
Ssr2	ENSMUSG00000041355	0.643102	0	0	0.714063
Wdr38	ENSMUSG00000035295	0.602403	0	0	0.882044
Sf3a2	ENSMUSG00000020211	0.682101	0	0	0.64428
Cbx1	ENSMUSG00000018666	0.671034	0	0	0.642239
Mt2	ENSMUSG00000031762	0.316951	0	0	1.28303
Uchl3	ENSMUSG00000022111	0.499187	0	0	0.757915
Stt3a	ENSMUSG00000032116	0.602068	0	0	0.747463
Spag5	ENSMUSG00000002055	0.626181	0	0	0.979678
Tbkbp1	ENSMUSG00000038517	0.652225	0	0	1.47852
Riox2	ENSMUSG00000022724	0.289535	0	0	0.735792
Paxip1	ENSMUSG00000002221	0.543436	0	1.20628	0.662913
Tada2a	ENSMUSG00000018651	0.604661	0	0	0.63789
Cd7	ENSMUSG00000025163	0.399493	0	0	1.30819
Tmpo	ENSMUSG00000019961	0.480827	0	2.20873	0.754073
Lbr	ENSMUSG00000004880	0.602096	0	0	0.6357
Tagln2	ENSMUSG00000026547	0.567983	0	0	1.03186
Trp53i11	ENSMUSG00000068735	0.518631	0	0	1.31008
Car5b	ENSMUSG00000031373	0.187467	0	0	1.35326
Myo5a	ENSMUSG00000034593	0.420428	0	0	0.898074
Anp32b	ENSMUSG00000028333	0.568784	0	0	0.611646
U2af1	ENSMUSG00000061613	0.384704	0	0	0.616257
Ccnb1	ENSMUSG00000041431	0.447927	0	1.27959	1.16799
Ctnna1	ENSMUSG00000037815	0.610208	0	0	0.738227
Lmnb1	ENSMUSG00000024590	0.426857	0	0	1.10523
Slc43a3	ENSMUSG00000027074	0.307808	0	1.25579	1.39713
Plk4	ENSMUSG00000025758	0.417305	0	1.18416	0.948227
Asb1	ENSMUSG00000026311	0.358069	0	0	0.665158
Tmed2	ENSMUSG00000029390	0.5233	0	1.7113	0.710746
Tpi1	ENSMUSG00000023456	0.387952	0	0	0.608536
Pgk1	ENSMUSG00000062070	0.356968	0	0	0.60438
Tfb1m	ENSMUSG00000036983	0.396733	0	0	0.655117
Tbc1d7	ENSMUSG00000021368	0.330569	0	0	0.757099
Mtfr2	ENSMUSG00000019992	0.606975	0	0	1.19485
Nsd2	ENSMUSG00000057406	0.486373	0	0	0.593828
Magt1	ENSMUSG00000031232	0.331266	0	0	0.954913
Mybl2	ENSMUSG00000017861	0.2268	0	0	1.38043
Dpagt1	ENSMUSG00000032123	0.334346	0	0	1.05508
Fam89b	ENSMUSG00000024939	0.654559	0	0	0.879004
Bcat1	ENSMUSG00000030268	0.379889	0	1.70509	1.53555
Pik3ap1	ENSMUSG00000025017	0.22651	0	0	1.47565
Igsf8	ENSMUSG00000038034	0.405416	0	1.43133	0.910733
Znhit3	ENSMUSG00000020526	0.491358	0	0.907279	0.724391
F2rl3	ENSMUSG00000050147	0.304895	0	0	1.87221
Tmco1	ENSMUSG00000052428	0.393708	0	0	0.62345
0610010F05Rik	ENSMUSG00000042208	0.49246	0	0	0.91599
Ect2	ENSMUSG00000027699	0.455565	0	0.993962	0.732665
Larp7	ENSMUSG00000027968	0.429552	0	0	0.687599
Phlda1	ENSMUSG00000020205	0.405096	0	0	1.34536
Tmem109	ENSMUSG00000034659	0.452095	0	1.68173	1.30114
Hist1h1c	ENSMUSG00000036181	0.492543	0	2.65345	0.821281
Foxd2os	ENSMUSG00000085399	0.413208	0	0	1.01758
Arl6ip1	ENSMUSG00000030654	0.454283	0	2.36643	0.780128
Arl10	ENSMUSG00000025870	0.324102	0	0	0.859702
Gtf3c5	ENSMUSG00000026816	0.505283	0	0	0.685804
Lig1	ENSMUSG00000056394	0.529525	0	0	0.956838
Nup205	ENSMUSG00000038759	0.426937	0	1.0767	0.651487
Crip1	ENSMUSG00000006360	0.403047	0	0	0.803445
Ryk	ENSMUSG00000032547	0.315541	0	0	1.18351
Nqo2	ENSMUSG00000046949	0.411452	0	0	1.24707
Pycrl	ENSMUSG00000022571	0.453015	0	0.757707	0.646364
Anxa4	ENSMUSG00000029994	0.424715	0	0	0.723986
Cenpw	ENSMUSG00000075266	0.311334	0	0	1.22171
Pmaip1	ENSMUSG00000024521	0.335127	0	0	0.784191
Cmc2	ENSMUSG00000014633	0.286455	0	0	0.925108
Pqlc1	ENSMUSG00000034006	0.411814	0	0	0.638679
Pxylp1	ENSMUSG00000043587	0.360583	0	0	0.798616
Capg	ENSMUSG00000056737	0.575772	0	1.23225	0.716487
Depdc1b	ENSMUSG00000021697	0.368263	0	0	1.07745
Anapc5	ENSMUSG00000029472	0.435536	0	0.931443	0.674382
Nup85	ENSMUSG00000020739	0.402657	0	0	0.86039
Dcbld2	ENSMUSG00000035107	0.245812	0	0	0.642983
Rars	ENSMUSG00000018848	0.311111	0	0	0.674735
Cdca5	ENSMUSG00000024791	0.432568	0	1.59894	1.00703
Dusp4	ENSMUSG00000031530	0.458179	0	2.23188	1.5422
Gstcd	ENSMUSG00000028018	0.238508	0	1.43392	0.816941
Hspa13	ENSMUSG00000032932	0.369832	0	0	0.620325
Ccne2	ENSMUSG00000028212	0.317035	0	0	1.05098
Lancl2	ENSMUSG00000062190	0.428331	0	1.08413	0.727693
Pelp1	ENSMUSG00000018921	0.611379	0	0	0.619394
Coq7	ENSMUSG00000030652	0.322304	0	0	0.752606
Nuf2	ENSMUSG00000026683	0.492655	0	0.988853	1.04112
Eomes	ENSMUSG00000032446	0.312017	0	0	1.72687
Tuba1b	ENSMUSG00000023004	0.379213	0	0	0.965069
Ptma	ENSMUSG00000026238	0.395137	0	0	0.865098
Pigt	ENSMUSG00000017721	0.30385	0	0	0.633128
Inf2	ENSMUSG00000037679	0.171313	0	0	1.1604
Cdc25a	ENSMUSG00000032477	0.43017	0	0	0.819898
Pdia6	ENSMUSG00000020571	0.397611	0	0	1.26371
Vsig10l	ENSMUSG00000070604	0.370711	0	0	0.623527
Ndufa12	ENSMUSG00000020022	0.321551	0	0	0.662383
Eif2ak3	ENSMUSG00000031668	0.415758	0	0	0.750038
Rras2	ENSMUSG00000055723	0.34938	0	0	0.859788
B3glct	ENSMUSG00000051950	0.289057	0	0	0.857724
Thy1	ENSMUSG00000032011	0.468031	0	0	0.813304
Gemin6	ENSMUSG00000055760	0.323572	0	0	0.944474
Tk1	ENSMUSG00000025574	0.334513	0	1.16768	0.940507
Eif2b3	ENSMUSG00000028683	0.391882	0	0	0.616318
Cinp	ENSMUSG00000021276	0.318833	0	0	0.642476
Tspan4	ENSMUSG00000025511	0.327645	0	0	0.702804
Hadh	ENSMUSG00000027984	0.25029	0	0	0.798501
Bora	ENSMUSG00000022070	0.344702	0	0	0.749292
Syne3	ENSMUSG00000054150	0.265436	0	1.4836	0.748232
Npm3	ENSMUSG00000056209	0.376997	0	0.996109	0.618629
Kpna3	ENSMUSG00000021929	0.323614	0	0	0.62981
Insl6	ENSMUSG00000050957	0.393555	0	0	1.24971
Asf1b	ENSMUSG00000005470	0.326192	0	0	1.08944
Ddost	ENSMUSG00000028757	0.42125	0	0	0.887682
Gtpbp10	ENSMUSG00000040464	0.40196	0	0	0.649125
Rhbdf2	ENSMUSG00000020806	0.219852	0	0	0.682635
Rwdd2a	ENSMUSG00000032417	0.3087	0	0	0.694948
Zdhhc2	ENSMUSG00000039470	0.231102	0	0	1.27248
Sapcd2	ENSMUSG00000026955	0.329022	0	0	0.892332
Rasd1	ENSMUSG00000049892	0.341496	0	0	0.760454
Cyp20a1	ENSMUSG00000049439	0.25423	0	0	0.795964
Hmgb2	ENSMUSG00000054717	0.240701	0	0	1.02793
E2f2	ENSMUSG00000018983	0.369283	0	1.62415	0.953632
Rrm2	ENSMUSG00000020649	0.271452	0	0	1.20599
Tirap	ENSMUSG00000032041	0.376565	0	0	0.640561
Efhd2	ENSMUSG00000040659	0.170323	0	0	0.768896
Sdhd	ENSMUSG00000000171	0.3402	0	0	0.619646
Klrd1	ENSMUSG00000030165	0.358069	0	0	1.36544
Tmem209	ENSMUSG00000029782	0.485044	0	1.57398	0.60142
Tnks1bp1	ENSMUSG00000033955	0.278204	0	2.92959	0.780588
Tdp1	ENSMUSG00000021177	0.251489	0	0	0.761108
Ccna2	ENSMUSG00000027715	0.351713	0	0	1.16845
Zbtb46	ENSMUSG00000027583	0.21027	0	0	1.18332
Acsl5	ENSMUSG00000024981	0.230015	0	0	0.691042
Rad21	ENSMUSG00000022314	0.482675	0	0	0.722116
Pmf1	ENSMUSG00000028066	0.431954	0	0.889747	0.697717
Akip1	ENSMUSG00000031023	0.320854	0	0	0.699654
Surf4	ENSMUSG00000014867	0.365219	0	0	0.689782
Carmil1	ENSMUSG00000021338	0.13656	0	0	0.636317
Gart	ENSMUSG00000022962	0.297587	0	0	0.718245
Mpp6	ENSMUSG00000038388	0.209517	0	0	0.806298
Cdca7l	ENSMUSG00000021175	0.249976	0	0	0.608331
Mrpl16	ENSMUSG00000024683	0.414964	0	0	0.641896
Dapk2	ENSMUSG00000032380	0.141607	0	0	1.95484
Pole2	ENSMUSG00000020974	0.315836	0	0	1.07997
Gpaa1	ENSMUSG00000022561	0.305676	0	0	0.635365
Anp32e	ENSMUSG00000015749	0.377234	0	0	0.613157
Cenpe	ENSMUSG00000045328	0.319209	0	0	0.917071
Chek1	ENSMUSG00000032113	0.244111	0	0	0.681506
Ablim2	ENSMUSG00000029095	0.173658	0	0	0.926865
Fgr	ENSMUSG00000028874	0.295793	0	1.66635	1.41244
Kif23	ENSMUSG00000032254	0.32852	0	0	0.948099
Hexb	ENSMUSG00000021665	0.364689	0	0	0.674891
Gars	ENSMUSG00000029777	0.339043	0	0	0.92297
Dclre1a	ENSMUSG00000025077	0.267072	0	0	1.03804
Lsr	ENSMUSG00000001247	0.232487	0	0	1.29366
Ccdc14	ENSMUSG00000022833	0.355518	0	0	0.717397
Cdc45	ENSMUSG00000000028	0.373345	0	0	1.09497
Ube2t	ENSMUSG00000026429	0.319209	0	0	0.858842
Phykpl	ENSMUSG00000020359	0.339573	0	0	0.585051
Tjp2	ENSMUSG00000024812	0.136515	0	0	0.913431
Tubd1	ENSMUSG00000020513	0.404747	0	0	0.599963
Nasp	ENSMUSG00000028693	0.304296	0	0	0.78996
Litaf	ENSMUSG00000022500	0.151899	0	0	0.750502
Cryz	ENSMUSG00000028199	0.276132	0	0	1.20274
Yif1b	ENSMUSG00000030588	0.46043	0	1.10835	0.73934
Etfb	ENSMUSG00000004610	0.202427	0	0	0.963984
Bsg	ENSMUSG00000023175	0.363254	0	0	0.615339
Vars	ENSMUSG00000007029	0.441627	0	0	0.605718
Raver2	ENSMUSG00000035275	0.41804	0	0	0.651135
Uap1	ENSMUSG00000026670	0.289066	0	1.14978	0.896173
Atad5	ENSMUSG00000017550	0.409598	0	0	0.907824
Adam22	ENSMUSG00000040537	0.162114	0	0	1.10546
Top2a	ENSMUSG00000020914	0.353664	0	0	0.947705
Bub1b	ENSMUSG00000040084	0.235142	0	0	0.965657
Thoc3	ENSMUSG00000025872	0.342625	0	0	0.648878
Cdc6	ENSMUSG00000017499	0.295771	0	1.36361	1.26067
Chst11	ENSMUSG00000034612	0.203163	0	0	1.54249
Unc93b1	ENSMUSG00000036908	0.130215	0	0	0.616221
Nos1	ENSMUSG00000029361	0.135034	0	0	2.02823
Traip	ENSMUSG00000032586	0.200689	0	0	1.13914
Rell1	ENSMUSG00000047881	0.244799	0	0	0.808732
Rrbp1	ENSMUSG00000027422	0.120085	0	0	0.630819
Ybx3	ENSMUSG00000030189	0.135333	0	0	0.940103
Ccdc138	ENSMUSG00000038010	0.175083	0	0	0.749919
Tbx21	ENSMUSG00000001444	0.0972249	0	0	0.958611
Arhgap19	ENSMUSG00000025154	0.165006	0	0	1.05945
Rpn2	ENSMUSG00000027642	0.30569	0	0	0.812601
Iqgap3	ENSMUSG00000028068	0.308923	0	0.808549	0.828912
Pgp	ENSMUSG00000043445	0.335043	0	0	0.601123
Ccne1	ENSMUSG00000002068	0.275992	0	0	1.46826
Snai3	ENSMUSG00000006587	0.271095	0	0	1.31473
Kif11	ENSMUSG00000012443	0.226382	0	0	1.00263
St3gal4	ENSMUSG00000032038	0.320199	0	0	0.714943
Magohb	ENSMUSG00000030188	0.20199	0	0	1.22223
Pdgfb	ENSMUSG00000000489	0.203793	0	0	1.49627
Kyat3	ENSMUSG00000040213	0.279523	0	0	0.923106
Wdhd1	ENSMUSG00000037572	0.238508	0	0	0.834794
Tanc2	ENSMUSG00000053580	0.132506	0	0	0.845687
E2f7	ENSMUSG00000020185	0.143975	0	0	1.04102
Poc1a	ENSMUSG00000023345	0.181836	0	0	0.962114
Raph1	ENSMUSG00000026014	0.104364	0	0	0.634622
Swap70	ENSMUSG00000031015	0.235983	0	0	0.775507
Cep78	ENSMUSG00000041491	0.223678	0	0	0.898753
Ehd2	ENSMUSG00000074364	0.151374	0	0	1.09871
Ptpn3	ENSMUSG00000038764	0.178056	0	2.21588	0.716172
Ndufaf2	ENSMUSG00000068184	0.101214	0	0	0.632834
Nup107	ENSMUSG00000052798	0.305476	0	1.18303	1.04799
Ppa1	ENSMUSG00000020089	0.309648	0	0	0.89615
Clic4	ENSMUSG00000037242	0.254346	0	0	0.888779
Ube2g2	ENSMUSG00000009293	0.122588	0	0	0.778093
Kntc1	ENSMUSG00000029414	0.281147	0	0	1.02811
Kif15	ENSMUSG00000036768	0.265641	0	0	0.969649
N4bp3	ENSMUSG00000001053	0.280359	0	1.4807	1.2511
Epas1	ENSMUSG00000024140	0.0631171	0	0	1.21291
Sfxn1	ENSMUSG00000021474	0.196589	0	0	0.738385
Tulp4	ENSMUSG00000034377	0.263413	0	0	0.958237
Crybg2	ENSMUSG00000012123	0.21447	0	0	0.739647
Arhgap21	ENSMUSG00000036591	0.142207	0	0	0.669392
Csrp1	ENSMUSG00000026421	0.157645	0	0	0.645476
Rnaseh2b	ENSMUSG00000021932	0.118311	0	0	1.01971
Ctc1	ENSMUSG00000020898	0.180937	0	0	0.644773
Hyou1	ENSMUSG00000032115	0.187815	0	0	1.03141
Optn	ENSMUSG00000026672	0.152608	0	0	1.1638
Rasgrp2	ENSMUSG00000032946	0.219143	0	0	0.875491
Mthfd1l	ENSMUSG00000040675	0.101068	0	0	0.688014
Ncald	ENSMUSG00000051359	0.0716819	0	0	2.78556
2900026A02Rik	ENSMUSG00000051339	0.0649848	0	0	1.3832
Mis18a	ENSMUSG00000022978	0	0.997993	0	0.63401
Pogk	ENSMUSG00000040596	0	0.956708	0	0.843259
Elp6	ENSMUSG00000054836	0	0.945474	0	0.616125
Nup37	ENSMUSG00000035351	0	0.90182	0	0.826288
Emp3	ENSMUSG00000040212	0	0.865832	0	1.04684
Zfp458	ENSMUSG00000055480	0	0.999442	0	0.626961
Timm50	ENSMUSG00000003438	0	0.998327	0	0.73519
Vat1	ENSMUSG00000034993	0	0.998132	1.05517	0.793146
Toe1	ENSMUSG00000028688	0	0.865832	0	0.599236
Hpse	ENSMUSG00000035273	0	0.926909	0	1.05337
Ggh	ENSMUSG00000073987	0	0.859532	0	1.1245
Tomm6	ENSMUSG00000033475	0	0.870432	0	0.721349
Kif18a	ENSMUSG00000027115	0	0.884788	0	0.81846
Ccdc34	ENSMUSG00000027160	0	0.837538	0	1.14642
Neto2	ENSMUSG00000036902	0	0.88837	0	1.36712
Kif20a	ENSMUSG00000003779	0	0.961782	0	1.1801
Borcs7	ENSMUSG00000062376	0	0.891673	0	0.637308
Chtf18	ENSMUSG00000019214	0	0.95459	0	1.14969
Ppm1j	ENSMUSG00000002228	0	0.580288	0	0.756551
Med30	ENSMUSG00000038622	0	0.90182	0	0.886638
Samd3	ENSMUSG00000051354	0	0.294929	0	1.69286
Cenpv	ENSMUSG00000018509	0	0.897249	0	1.11863
Ddx39	ENSMUSG00000005481	0	0.859532	0	0.645949
Recql4	ENSMUSG00000033762	0	0.83344	0	0.932064
Hopxos	ENSMUSG00000087541	0	0.435216	0	1.07008
Cxcr3	ENSMUSG00000050232	0	0.422602	0	0.746701
Bysl	ENSMUSG00000023988	0	0.83344	0	0.665065
Brip1	ENSMUSG00000034329	0	0.58827	0	0.803072
Napsa	ENSMUSG00000002204	0	0.48163	0	1.80001
Cenpm	ENSMUSG00000068101	0	0.620299	0	0.835574
Apbb1	ENSMUSG00000037032	0	0.470577	0	1.16582
Hprt	ENSMUSG00000025630	0	0.425376	0	0.651124
Gzma	ENSMUSG00000023132	0	0.453154	0	3.53875
Qrfp	ENSMUSG00000043102	0	0.435216	0	1.14806
Bspry	ENSMUSG00000028392	0	0.283584	0	1.28024
Ncf1	ENSMUSG00000015950	0	0.442394	0	2.3839
Zwilch	ENSMUSG00000032400	0	0.461907	0	0.922512
Mrto4	ENSMUSG00000028741	0	0.460151	0	0.65247
As3mt	ENSMUSG00000003559	0	0.389519	0	1.08913
Ogfrl1	ENSMUSG00000026158	0	0.418769	0	0.945678
Ttl	ENSMUSG00000027394	0	0.448624	0	0.790513
Cars	ENSMUSG00000010755	0	0.453154	0	0.63858
Fasl	ENSMUSG00000000817	0	0.492237	0	1.16951
Lrp11	ENSMUSG00000019796	0	0.488877	0	0.656592
Bub1	ENSMUSG00000027379	0	0.487665	0	1.06134
Espl1	ENSMUSG00000058290	0	0.435216	0	1.07445
Myl4	ENSMUSG00000061086	0	0.217608	0	1.03817
Carhsp1	ENSMUSG00000008393	0	0.453154	0	0.659794
C2cd2l	ENSMUSG00000032120	0	0.461907	0	0.621652
St14	ENSMUSG00000031995	0	0.179974	0	1.86765
Kmt5a	ENSMUSG00000049327	0	0.309443	0	0.738312
Thop1	ENSMUSG00000004929	0	0.432916	0	0.836397
Rai14	ENSMUSG00000022246	0	0.153969	0	1.60899
Pik3c2b	ENSMUSG00000026447	0	0.349171	0	1.209
Mthfd1	ENSMUSG00000021048	0	0.20836	0	0.938642
Sulf2	ENSMUSG00000006800	0	0.248536	0	2.14579
Fh1	ENSMUSG00000026526	0	0.281735	0	0.599774
Apobec2	ENSMUSG00000040694	0	0.13959	0	0.868808
Depdc1a	ENSMUSG00000028175	0	0.493505	0	1.12695
Lcmt1	ENSMUSG00000030763	0	0.247122	0	0.599073
Nudt4	ENSMUSG00000020029	0	0.309443	0	0.719908
Aurkb	ENSMUSG00000020897	0	0.425376	0	1.13025
Dock5	ENSMUSG00000044447	0	0.0884788	0	0.72493
Ipo11	ENSMUSG00000042590	0	0.189552	0	0.689808
Nrn1	ENSMUSG00000039114	0	0.283584	0	1.33438
Rttn	ENSMUSG00000023066	0	0.233727	0	0.669516
Tyro3	ENSMUSG00000027298	0	0.277813	0	0.592881
Klf8	ENSMUSG00000041649	0	0.225455	0	1.14037
Cep85	ENSMUSG00000037443	0	0.319916	0	0.629483
Dlgap5	ENSMUSG00000037544	0	0.330063	0	1.12261
C77080	ENSMUSG00000050390	0	0.192228	0	0.83214
Prex2	ENSMUSG00000048960	0	0.264862	0	0.649175
Ern1	ENSMUSG00000020715	0	0.145072	0	0.96137
Rsph1	ENSMUSG00000024033	0	0.166688	0	0.683003
2010300C02Rik	ENSMUSG00000026090	0	0.157579	0	1.02411
Adamts14	ENSMUSG00000059901	0	0.119648	0	0.836242
Lrrk2	ENSMUSG00000036273	0	0.103812	0	1.03291
Tcf19	ENSMUSG00000050410	0	0	0	0.925812
Rad54b	ENSMUSG00000078773	0	0	0	0.882194
Polh	ENSMUSG00000023953	0	0	0	0.844201
Cenpf	ENSMUSG00000026605	0	0	0	0.728235
Nefh	ENSMUSG00000020396	0	0	0	1.01458
Phlda3	ENSMUSG00000041801	0	0	0	0.972354
Ifi30	ENSMUSG00000031838	0	0	0	0.721526
Gm12500	ENSMUSG00000056411	0	0	0	0.615304
Pygm	ENSMUSG00000032648	0	0	0	1.08169
Gm26694	ENSMUSG00000097518	0	0	0	0.605033
Gm10143	ENSMUSG00000064032	0	0	0	0.886876
Armcx4	ENSMUSG00000049804	0	0	0	0.770707
Nhp2	ENSMUSG00000001056	0	0	0	0.694726
Tacc3	ENSMUSG00000037313	0	0	0	1.05467
Syce2	ENSMUSG00000003824	0	0	0	0.736024
Lsm2	ENSMUSG00000007050	0	0	0	0.783783
Bhlhe41	ENSMUSG00000030256	0	0	0	0.962158
Slc19a1	ENSMUSG00000001436	0	0	0	0.592493
Gm26880	ENSMUSG00000096979	0	0	0	0.588433
Ctsd	ENSMUSG00000007891	0	0	0	0.952637
Skp2	ENSMUSG00000054115	0	0	0	1.05908
Nol12	ENSMUSG00000033099	0	0	0	0.642769
Fen1	ENSMUSG00000024742	0	0	0	0.918667
Nradd	ENSMUSG00000032491	0	0	0	0.590939
Mrpl22	ENSMUSG00000020514	0	0	0	0.604533
Mdm1	ENSMUSG00000020212	0	0	0	0.635008
Gpn2	ENSMUSG00000028848	0	0	0	0.677739
Kyat1	ENSMUSG00000039648	0	0	0	0.612554
Cnnm4	ENSMUSG00000037408	0	0	0	0.622037
Ada	ENSMUSG00000017697	0	0	0	0.654274
Tnfsf9	ENSMUSG00000035678	0	0	0	0.737243
Tmem97	ENSMUSG00000037278	0	0	0	1.06414
Rpf2	ENSMUSG00000038510	0	0	0	0.709139
Cdc25c	ENSMUSG00000044201	0	0	0	1.13334
Prim2	ENSMUSG00000026134	0	0	0	0.826131
Usp39	ENSMUSG00000056305	0	0	0	0.613901
Slc27a4	ENSMUSG00000059316	0	0	0	0.772666
Zfp599	ENSMUSG00000062794	0	0	0	1.08741
Pon3	ENSMUSG00000029759	0	0	0	0.683536
Gins4	ENSMUSG00000031546	0	0	0	0.697391
Xrcc2	ENSMUSG00000028933	0	0	0	0.835592
Rnf26	ENSMUSG00000053128	0	0	0	0.70219
C1qtnf6	ENSMUSG00000022440	0	0	0	1.16514
Ctsw	ENSMUSG00000024910	0	0	0	1.49837
Mcm10	ENSMUSG00000026669	0	0	0	1.24879
Rpp30	ENSMUSG00000024800	0	0	0	0.813584
Zgrf1	ENSMUSG00000051278	0	0	0	0.779521
Ttc30a1	ENSMUSG00000075271	0	0	0	0.603219
Ticrr	ENSMUSG00000046591	0	0	0	0.883424
Mrpl28	ENSMUSG00000024181	0	0	0	0.622224
Odf2	ENSMUSG00000026790	0	0	0	0.726185
Prrc1	ENSMUSG00000024594	0	0	0	0.72151
Ebp	ENSMUSG00000031168	0	0	0	0.588284
Nudt1	ENSMUSG00000036639	0	0	0	0.657882
Wrnip1	ENSMUSG00000021400	0	0	0	0.591614
Snrpf	ENSMUSG00000020018	0	0	0	0.626832
n-R5-8s1	ENSMUSG00000065922	0	0	0	0.926716
Hmmr	ENSMUSG00000020330	0	0	0	1.0042
Pkmyt1	ENSMUSG00000023908	0	0	0	0.643223
Pfas	ENSMUSG00000020899	0	0	0	0.593036
Paics	ENSMUSG00000029247	0	0	0	0.698236
Lgalsl	ENSMUSG00000042363	0	0	0	0.836209
Fam151b	ENSMUSG00000034334	0	0	0	0.599472
Srsf9	ENSMUSG00000029538	0	0	0	0.588414
Pif1	ENSMUSG00000041064	0	0	0	0.721832
Mcm3	ENSMUSG00000041859	0	0	0	1.03094
Lmtk3	ENSMUSG00000062044	0	0	0	1.74403
Tsga10	ENSMUSG00000060771	0	0	0	0.823851
Npnt	ENSMUSG00000040998	0	0	0	1.37744
Dnajb11	ENSMUSG00000004460	0	0	0	1.05446
Bcap31	ENSMUSG00000002015	0	0	0	0.637425
Zcchc3	ENSMUSG00000074682	0	0	0	1.20702
Pask	ENSMUSG00000026274	0	0	0	1.06801
Nup133	ENSMUSG00000039509	0	0	0	0.860228
Usp14	ENSMUSG00000047879	0	0	0	0.731765
Troap	ENSMUSG00000032783	0	0	0	1.04687
Rad18	ENSMUSG00000030254	0	0	0	0.699143
Arl4d	ENSMUSG00000034936	0	0	0	1.00644
Sssca1	ENSMUSG00000079478	0	0	0	0.835133
Rbmx2	ENSMUSG00000031107	0	0	0	0.806181
Psmc3ip	ENSMUSG00000019303	0	0	0	0.797559
Mtbp	ENSMUSG00000022369	0	0	0	0.625292
Rfc2	ENSMUSG00000023104	0	0	0	0.724744
Prc1	ENSMUSG00000038943	0	0	0	0.918629
Pi4k2b	ENSMUSG00000029186	0	0	0	0.718697
Fam19a3	ENSMUSG00000055865	0	0	0	0.956466
Esco2	ENSMUSG00000022034	0	0	0	0.918935
Alg6	ENSMUSG00000073792	0	0	0	0.830355
Chaf1b	ENSMUSG00000022945	0	0	0	1.03784
Smyd2	ENSMUSG00000026603	0	0	0	0.643149
Tmem41b	ENSMUSG00000047554	0	0	0	0.74267
Nans	ENSMUSG00000028334	0	0	0	0.767092
Mtfp1	ENSMUSG00000004748	0	0	0	0.893963
Lpar5	ENSMUSG00000067714	0	0	0	0.864144
Pop4	ENSMUSG00000030423	0	0	0	0.746367
Pglyrp1	ENSMUSG00000030413	0	0	0	1.03644
Knl1	ENSMUSG00000027326	0	0	0	0.899415
Dkkl1	ENSMUSG00000030792	0	0	0	2.24946
Ddx1	ENSMUSG00000037149	0	0	0	0.589816
Cdc34	ENSMUSG00000020307	0	0	0	0.70206
0610009B22Rik	ENSMUSG00000007777	0	0	0	0.789884
Paox	ENSMUSG00000025464	0	0	0	1.11691
Dab2ip	ENSMUSG00000026883	0	0	0	0.714106
Crmp1	ENSMUSG00000029121	0	0	0	0.983044
Ung	ENSMUSG00000029591	0	0	0.84436	0.736072
Kank3	ENSMUSG00000042099	0	0	0	0.688804
Gpc1	ENSMUSG00000034220	0	0	0	1.89461
Nubp1	ENSMUSG00000022503	0	0	0	0.596948
Idh3a	ENSMUSG00000032279	0	0	0	1.01889
Hspb6	ENSMUSG00000036854	0	0	0	0.586695
Fancb	ENSMUSG00000047757	0	0	0	0.807031
Exo1	ENSMUSG00000039748	0	0	0	1.135
Cdkn3	ENSMUSG00000037628	0	0	0	1.08491
Akr1e1	ENSMUSG00000045410	0	0	0	0.679075
Reep4	ENSMUSG00000033589	0	0	0	0.969823
Prkar2a	ENSMUSG00000032601	0	0	0	0.76498
Hmgn5	ENSMUSG00000031245	0	0	0	0.650011
Gtse1	ENSMUSG00000022385	0	0	0	1.14668
Sun1	ENSMUSG00000036817	0	0	0	1.06067
Thg1l	ENSMUSG00000011254	0	0	0	0.681225
Rpn1	ENSMUSG00000030062	0	0	0	0.983506
Ebna1bp2	ENSMUSG00000028729	0	0	0	0.590942
Cdc20	ENSMUSG00000006398	0	0	0	1.04532
D930028M14Rik	ENSMUSG00000074274	0	0	0	0.903537
Cdc25b	ENSMUSG00000027330	0	0	0	0.692056
Mbnl3	ENSMUSG00000036109	0	0	0	0.737553
Polq	ENSMUSG00000034206	0	0	0	0.82101
Rpa3	ENSMUSG00000012483	0	0	0	0.934434
Lnpk	ENSMUSG00000009207	0	0	0	0.750392
Tpx2	ENSMUSG00000027469	0	0	0	1.01645
Rp2	ENSMUSG00000060090	0	0	0	0.588317
Kdm8	ENSMUSG00000030752	0	0	0	0.677674
Gins2	ENSMUSG00000031821	0	0	0	0.810572
Cenpi	ENSMUSG00000031262	0	0	0	1.18846
Aimp2	ENSMUSG00000029610	0	0	0	0.763431
Hmbs	ENSMUSG00000032126	0	0	0	0.742281
Chpt1	ENSMUSG00000060002	0	0	0	0.725738
Stau2	ENSMUSG00000025920	0	0	0	1.16281
Piga	ENSMUSG00000031381	0	0	0	0.626286
Nid2	ENSMUSG00000021806	0	0	0	1.69586
Dctd	ENSMUSG00000031562	0	0	0	0.889372
Lrr1	ENSMUSG00000034883	0	0	0	1.0649
L1cam	ENSMUSG00000031391	0	0	0	0.775602
Alad	ENSMUSG00000028393	0	0	0	0.628171
Selenos	ENSMUSG00000075701	0	0	0	0.963676
Pdap1	ENSMUSG00000029623	0	0	0	0.661589
Haus6	ENSMUSG00000038047	0	0	0	0.725301
Cox5b	ENSMUSG00000061518	0	0	0	0.630788
Wisp1	ENSMUSG00000005124	0	0	0	2.24848
Selenon	ENSMUSG00000050989	0	0	0	0.605883
Cenpn	ENSMUSG00000031756	0	0	0	1.1569
Tmem238	ENSMUSG00000030431	0	0	0	0.893785
Shcbp1	ENSMUSG00000022322	0	0	0	1.04085
Kif22	ENSMUSG00000030677	0	0	0	0.960159
D6Wsu163e	ENSMUSG00000030347	0	0	0	0.688713
Ggct	ENSMUSG00000002797	0	0	0	0.616816
Cep72	ENSMUSG00000021572	0	0	0	0.722276
Snrnp25	ENSMUSG00000040767	0	0	0	0.743226
Slf1	ENSMUSG00000021597	0	0	0	0.677115
Hmgb3	ENSMUSG00000015217	0	0	0	0.679117
Cdca3	ENSMUSG00000023505	0	0	0	1.06875
Prdx4	ENSMUSG00000025289	0	0	0	0.80637
Prf1	ENSMUSG00000037202	0	0	0	1.10829
Alg8	ENSMUSG00000035704	0	0	0	0.904957
Baiap3	ENSMUSG00000047507	0	0	0	1.02949
Slc9a5	ENSMUSG00000014786	0	0	2.29422	1.1651
Ttf2	ENSMUSG00000033222	0	0	0	0.68239
Lcn4	ENSMUSG00000026919	0	0	0	1.26267
Kdelr2	ENSMUSG00000079111	0	0	0	0.922826
2610318N02Rik	ENSMUSG00000049916	0	0	0	1.05184
Ccnb2	ENSMUSG00000032218	0	0	0	1.13177
Reep5	ENSMUSG00000005873	0	0	0	0.958584
Penk	ENSMUSG00000045573	0	0	0	2.24977
Nrm	ENSMUSG00000059791	0	0	0	0.772992
Hat1	ENSMUSG00000027018	0	0	0	0.792483
Dnaaf5	ENSMUSG00000025857	0	0	0	1.04055
Colgalt1	ENSMUSG00000034807	0	0	0	0.797135
Anapc15	ENSMUSG00000030649	0	0	0	0.733303
Hopx	ENSMUSG00000059325	0	0	0	1.16152
Cdr2	ENSMUSG00000030878	0	0	0	0.698016
Rbbp7	ENSMUSG00000031353	0	0	0	0.654513
Cchcr1	ENSMUSG00000040312	0	0	0	0.760703
Trip13	ENSMUSG00000021569	0	0	0	1.18704
Dnaaf2	ENSMUSG00000020973	0	0	0	0.698605
Psmd12	ENSMUSG00000020720	0	0	0	0.587722
Melk	ENSMUSG00000035683	0	0	0	1.06715
Mcm7	ENSMUSG00000029730	0	0	0	1.023
Gen1	ENSMUSG00000051235	0	0	0	0.783778
Ubxn8	ENSMUSG00000052906	0	0	0	0.655127
Wee1	ENSMUSG00000031016	0	0	0	0.652158
Prim1	ENSMUSG00000025395	0	0	0	0.82235
Pidd1	ENSMUSG00000025507	0	0	0	0.964871
Ankrd29	ENSMUSG00000057766	0	0	0	1.22253
Serpinb1a	ENSMUSG00000044734	0	0	0	1.20615
Rom1	ENSMUSG00000071648	0	0	1.23344	0.723692
Pebp1	ENSMUSG00000032959	0	0	0	0.658894
Ggt1	ENSMUSG00000006345	0	0	0	1.83324
Ncf4	ENSMUSG00000071715	0	0	0	0.911984
Plekhg3	ENSMUSG00000052609	0	0	0	0.716844
Gzmm	ENSMUSG00000054206	0	0	0	1.09819
Tmem237	ENSMUSG00000038079	0	0	0	0.945146
Gar1	ENSMUSG00000028010	0	0	0	0.596496
Itgam	ENSMUSG00000030786	0	0	0	0.692971
Myadm	ENSMUSG00000068566	0	0	0	1.59737
Mb21d1	ENSMUSG00000032344	0	0	0	0.679464
Fam111a	ENSMUSG00000024691	0	0	0	0.841523
Dtl	ENSMUSG00000037474	0	0	1.24207	0.950187
5033430I15Rik	ENSMUSG00000038152	0	0	0	0.628074
Ifitm10	ENSMUSG00000045777	0	0	0	1.52757
Pold1	ENSMUSG00000038644	0	0	0	0.774255
Cd200r4	ENSMUSG00000062082	0	0	0	0.984299
Mcm8	ENSMUSG00000027353	0	0	0	1.25344
Hpf1	ENSMUSG00000038005	0	0	0	0.663162
Acsbg1	ENSMUSG00000032281	0	0	0	1.30764
Chaf1a	ENSMUSG00000002835	0	0	0	1.10061
Hcn2	ENSMUSG00000020331	0	0	0	0.655709
Foxm1	ENSMUSG00000001517	0	0	0	0.934735
Cad	ENSMUSG00000013629	0	0	0	0.805207
Ska1	ENSMUSG00000036223	0	0	0	1.14554
Tmbim1	ENSMUSG00000006301	0	0	0	0.74262
Plac8	ENSMUSG00000029322	0	0	0	1.27839
Pcyt1b	ENSMUSG00000035246	0	0	0	1.56182
Gins1	ENSMUSG00000027454	0	0	0	1.15404
Lgals3	ENSMUSG00000050335	0	0	0	1.25842
Rad54l	ENSMUSG00000028702	0	0	0	1.14521
Brd9	ENSMUSG00000057649	0	0	0	0.591209
Tbl2	ENSMUSG00000005374	0	0	0	0.6856
Fam185a	ENSMUSG00000047221	0	0	0	0.92747
Itgax	ENSMUSG00000030789	0	0	0	2.70632
Mlf1	ENSMUSG00000048416	0	0	0	1.13924
Ckap2l	ENSMUSG00000048327	0	0	0	1.04504
0610040F04Rik	ENSMUSG00000087341	0	0	2.29697	0.877611
Mt1	ENSMUSG00000031765	0	0	0	2.06306
Nkg7	ENSMUSG00000004612	0	0	0	1.27685
Klrg1	ENSMUSG00000030114	0	0	0	1.32777

## Sheet: HDM_DOWNreg
Gene Symbol	ENSEMBL ID	ChIP-seq c-Maf Score	Motif c-Maf Score	-log10 (BETA score)	-log2 (FC RNA-seq)
Pou2af1	ENSMUSG00000032053	0.981791	0.922171	2.54318	-2.45924
Maf	ENSMUSG00000055435	0.220612	0.213666	1.84619	-8.28582
Il21	ENSMUSG00000027718	0.995601	0.984189	1.71377	-1.98202
Gadd45a	ENSMUSG00000036390	0.990044	0.984256	0	-0.94251
Stab1	ENSMUSG00000042286	0.993583	0.977673	0	-0.866923
Snx2	ENSMUSG00000034484	0.98495	0.871862	1.27737	-1.28965
Rorc	ENSMUSG00000028150	0.962888	0.961615	0.739929	-1.37209
Slc39a8	ENSMUSG00000053897	0.928125	0.997817	0.846185	-0.634195
Miat	ENSMUSG00000097767	0.972447	0.977673	0	-4.3229
Ube2e3	ENSMUSG00000027011	0.973274	0.899183	1.42481	-0.768654
Selenop	ENSMUSG00000064373	0.945788	0.959911	0	-0.637499
Tmem42	ENSMUSG00000066233	0.959812	0.905732	0.588212	-0.636421
Gpat3	ENSMUSG00000029314	0.910346	0.89442	0	-1.8035
Tnfrsf23	ENSMUSG00000037613	0.880263	0.842722	0.841939	-0.79067
Tha1	ENSMUSG00000017713	0.761949	0.982172	0	-1.05881
Angptl6	ENSMUSG00000038742	0.916515	0.854662	0.991826	-0.975803
Mcl1	ENSMUSG00000038612	0.96484	0.884299	1.73259	-0.585128
Ahr	ENSMUSG00000019256	0.852181	0.842722	0.920819	-0.63711
Cd55	ENSMUSG00000026399	0.74637	0.999504	0	-0.815344
Gm14718	ENSMUSG00000085808	0.810174	0.977475	1.57905	-0.714332
Lgmn	ENSMUSG00000021190	0.777561	0.842722	0	-2.1419
Hmgn1	ENSMUSG00000040681	0.801674	0.871862	0.732828	-0.628509
Il17f	ENSMUSG00000041872	0.978054	0.47817	1.28525	-2.66647
Tnfrsf26	ENSMUSG00000045362	0.949228	0.592531	1.30945	-1.09773
Slc16a5	ENSMUSG00000045775	0.499008	0.497982	1.63733	-2.99854
Mafg	ENSMUSG00000051510	0.826423	0.483528	1.69486	-1.00088
Fam83g	ENSMUSG00000042377	0.79959	0.493467	1.79997	-1.54484
Metrnl	ENSMUSG00000039208	0.869282	0.607758	1.5039	-1.18472
Prrg4	ENSMUSG00000027171	0.819535	0.557294	0	-0.725803
Ky	ENSMUSG00000035606	0.517723	0.619731	0	-1.34918
Adam33	ENSMUSG00000027318	0.568253	0.59273	0	-3.15051
Mylip	ENSMUSG00000038175	0.70337	0.47774	0	-1.12972
Cdc42bpb	ENSMUSG00000021279	0.482034	0.657758	0	-0.589354
Plekho1	ENSMUSG00000015745	0.590853	0.463376	0	-0.587879
Trib2	ENSMUSG00000020601	0.724606	0.38456	1.85078	-0.701269
Tcf7	ENSMUSG00000000782	0.629345	0.477635	1.61961	-1.47232
Plcxd2	ENSMUSG00000087141	0.849858	0.23452	1.09093	-0.854896
A630014C17Rik	ENSMUSG00000086395	0.378615	0.579929	0	-1.5103
Lif	ENSMUSG00000034394	0.784003	0.226433	2.28786	-2.10706
Glrx	ENSMUSG00000021591	0.473977	0.452486	1.76498	-0.750494
Arnt2	ENSMUSG00000015709	0.490615	0.490094	0	-4.34279
Podnl1	ENSMUSG00000012889	0.499768	0.499355	2.16954	-2.29257
Slamf1	ENSMUSG00000015316	0.754975	0.306205	2.27327	-1.22173
Gnptab	ENSMUSG00000035311	0.823679	0.185698	0	-0.629639
Sbf2	ENSMUSG00000038371	0.450468	0.47817	1.20163	-0.651991
Wdfy2	ENSMUSG00000014547	0.738852	0.25931	0	-0.724642
Cxcr5	ENSMUSG00000047880	0.626997	0.315832	1.30803	-1.73237
Irf2bp2	ENSMUSG00000051495	0.574227	0.369093	1.91721	-0.602673
Siah3	ENSMUSG00000091722	0.608077	0.293454	1.25204	-0.885802
Dpp4	ENSMUSG00000035000	0.805726	0.147383	0	-0.851431
Samd11	ENSMUSG00000096351	0.491896	0.499471	1.20824	-2.2826
Neb	ENSMUSG00000026950	0.530301	0.379149	0	-1.23892
Ubtd1	ENSMUSG00000025171	0.452155	0.459845	0	-0.697228
Sh2d1a	ENSMUSG00000005696	0.492177	0.487778	0	-1.46306
Kcnk5	ENSMUSG00000023243	0.515397	0.39484	0	-0.672353
Acoxl	ENSMUSG00000027380	0.627993	0.235513	0	-1.15873
Dnase1l3	ENSMUSG00000025279	0.564317	0.321194	0.936291	-1.16143
Gpr155	ENSMUSG00000041762	0.370688	0.435931	0	-1.08277
St6gal1	ENSMUSG00000022885	0.489779	0.360691	0	-0.849236
Bach2	ENSMUSG00000040270	0.706702	0.167042	0	-1.67618
4932438H23Rik	ENSMUSG00000039851	0.69139	0.198624	0	-1.38404
Pitpnc1	ENSMUSG00000040430	0.683898	0.168184	2.57594	-0.730457
B4galt1	ENSMUSG00000028413	0.732985	0.0936357	0	-0.686702
Ulk1	ENSMUSG00000029512	0.535783	0.325858	1.96738	-0.834807
Osbpl9	ENSMUSG00000028559	0.620457	0.260959	0	-0.739377
Grhl1	ENSMUSG00000020656	0.686336	0.180458	0	-0.747266
Ddr1	ENSMUSG00000003534	0.615762	0.278647	1.68256	-1.09747
Foxp1	ENSMUSG00000030067	0.627263	0.209604	1.45358	-0.68929
Rreb1	ENSMUSG00000039087	0.643096	0.179855	0	-0.638823
Prkcq	ENSMUSG00000026778	0.63443	0.12999	1.90798	-0.716576
Cdk6	ENSMUSG00000040274	0.666768	0.183994	0	-0.6276
Myb	ENSMUSG00000019982	0.579565	0.229923	0.721933	-1.03909
Pim2	ENSMUSG00000031155	0.349221	0.444663	0	-1.03748
Coro2b	ENSMUSG00000041729	0.526104	0.247431	0	-2.71442
Tgfbr3	ENSMUSG00000029287	0.675773	0.0885005	0	-1.07704
Sntb1	ENSMUSG00000060429	0.472325	0.255846	1.23277	-0.796621
Il6ra	ENSMUSG00000027947	0.623808	0.148265	0	-0.615806
Mob3b	ENSMUSG00000073910	0.637941	0.131384	0.86774	-0.682833
Nsg2	ENSMUSG00000020297	0.491213	0.256437	0	-1.52028
Fam20a	ENSMUSG00000020614	0.430484	0.306293	0	-1.72713
Tasp1	ENSMUSG00000039033	0.595971	0.149864	0	-1.07052
Gas7	ENSMUSG00000033066	0.318333	0.296591	0	-1.32083
Pde4b	ENSMUSG00000028525	0.603897	0.1111	1.48413	-0.754889
Emp1	ENSMUSG00000030208	0.485951	0.226433	1.1749	-1.31573
Baz1a	ENSMUSG00000035021	0.529547	0.181146	0	-0.608974
Tesc	ENSMUSG00000029359	0.509088	0.111166	1.14618	-0.772052
Ankrd6	ENSMUSG00000040183	0.473253	0.13378	0	-0.773884
Ssh2	ENSMUSG00000037926	0.563457	0.119989	1.24435	-0.969299
Stat4	ENSMUSG00000062939	0.539806	0.0913171	1.56209	-0.599314
Tbc1d4	ENSMUSG00000033083	0.431855	0.136497	0	-0.942284
Smox	ENSMUSG00000027333	0.307867	0.2124	0	-0.846926
B4galnt4	ENSMUSG00000055629	0.33104	0.32405	1.90518	-1.73785
Il17ra	ENSMUSG00000002897	0.476627	0.11942	0	-0.628048
St8sia1	ENSMUSG00000030283	0.50177	0.18333	0.889074	-0.862235
2700097O09Rik	ENSMUSG00000062198	0.307842	0.301911	0	-0.752092
Gm15270	ENSMUSG00000087400	0.303267	0.327942	0	-1.82598
Zswim6	ENSMUSG00000032846	0.369544	0.12939	0	-0.590787
Adarb1	ENSMUSG00000020262	0.33695	0.180458	0	-0.779101
Slc9a9	ENSMUSG00000031129	0.4163	0.228881	2.05626	-0.602734
Aff1	ENSMUSG00000029313	0.535022	0.105124	1.55533	-0.616052
Ifngr1	ENSMUSG00000020009	0.432441	0.163061	2.06601	-0.617076
Cnst	ENSMUSG00000038949	0.254782	0.302809	0	-0.638525
Smo	ENSMUSG00000001761	0.325031	0.280907	0.58838	-1.12574
Antxr2	ENSMUSG00000029338	0.337648	0.227227	2.44624	-0.860725
Rnf144a	ENSMUSG00000020642	0.330579	0.196884	0	-0.854464
Abtb2	ENSMUSG00000032724	0.400772	0.186619	0	-1.56942
Usp2	ENSMUSG00000032010	0.420911	0.170932	0	-0.78658
Rnase4	ENSMUSG00000021876	0.18368	0.339477	0.672233	-2.04481
Tle4	ENSMUSG00000024642	0.306989	0.196004	0	-0.640821
Cdh23	ENSMUSG00000012819	0.395355	0.199451	0	-2.22543
Ica1l	ENSMUSG00000026018	0.249967	0.243856	0	-2.86651
Zfand2a	ENSMUSG00000053581	0.210432	0.321194	0	-0.65462
Spata13	ENSMUSG00000021990	0.406455	0.133187	0	-0.638135
Rasa3	ENSMUSG00000031453	0.284658	0.208205	2.37634	-0.803449
Gramd3	ENSMUSG00000001700	0.284394	0.23422	0	-1.08735
Rapgef4	ENSMUSG00000049044	0.286081	0.188344	0	-0.635541
Fbxo17	ENSMUSG00000030598	0.241105	0.294766	0	-1.12544
Il4	ENSMUSG00000000869	0.263322	0.290621	1.12154	-1.41217
Arhgef9	ENSMUSG00000025656	0.177794	0.120448	0	-0.990437
Galnt2	ENSMUSG00000089704	0.396581	0.113754	0	-1.00736
Ifngr2	ENSMUSG00000022965	0.169517	0.226433	0	-1.19931
Mturn	ENSMUSG00000038065	0.198448	0.292451	0	-1.20167
Sidt1	ENSMUSG00000022696	0.182425	0.235728	0	-0.666797
Ipmk	ENSMUSG00000060733	0.32747	0.194212	0	-0.794513
Bmp7	ENSMUSG00000008999	0.124606	0.359905	0	-1.30021
Rnf145	ENSMUSG00000019189	0.359905	0.140816	1.62782	-0.672092
Slc43a1	ENSMUSG00000027075	0.229972	0.247577	0.97021	-1.12959
Rapgef2	ENSMUSG00000062232	0.409923	0.0672042	0	-0.724902
Pou6f1	ENSMUSG00000009739	0.195305	0.280907	0	-1.22691
Abcb9	ENSMUSG00000029408	0.301343	0.159621	0	-0.79061
Icos	ENSMUSG00000026009	0.223373	0.213666	2.88975	-0.818976
Lrrc6	ENSMUSG00000022375	0.133814	0.196653	0	-1.06354
Atrnl1	ENSMUSG00000054843	0.215504	0.158883	0.494579	-0.615968
Tanc1	ENSMUSG00000035168	0.267066	0.16992	0	-0.695614
Prss12	ENSMUSG00000027978	0.178985	0.213666	0	-2.57256
Pard3	ENSMUSG00000025812	0.0958839	0.258795	0	-0.984216
Nav2	ENSMUSG00000052512	0.159307	0.202984	0	-1.04874
Jakmip1	ENSMUSG00000063646	0.179052	0.25394	1.24154	-0.635438
Pik3r5	ENSMUSG00000020901	0.331922	0.0835941	0	-0.891527
Pde4d	ENSMUSG00000021699	0.224274	0.0860041	0	-0.72147
Scml4	ENSMUSG00000044770	0.219611	0.115788	0.960983	-0.714967
Adamts3	ENSMUSG00000043635	0.147448	0.197109	0	-1.02178
Ripor2	ENSMUSG00000036006	0.261883	0.0973506	0	-0.621995
Gm20388	ENSMUSG00000092329	0.144226	0.119113	0	-1.00166
Kbtbd11	ENSMUSG00000055675	0.170622	0.186842	0	-0.637792
Vrk1	ENSMUSG00000021115	0.111414	0.110537	0	-0.622652
Otud1	ENSMUSG00000043415	0.940363	0	0.519849	-0.755181
Rap2a	ENSMUSG00000051615	0.940297	0	0	-0.85738
Slc17a8	ENSMUSG00000019935	0.96775	0	0	-1.57848
1190002N15Rik	ENSMUSG00000045414	0.966808	0	1.37603	-1.55387
Cdkn2d	ENSMUSG00000096472	0.921311	0	0.982132	-0.587125
Txk	ENSMUSG00000054892	0.935236	0	1.36051	-0.649812
Gm9889	ENSMUSG00000052769	0.959944	0	0	-1.01684
Slc16a6	ENSMUSG00000041920	0.966031	0	2.007	-0.885127
C030034L19Rik	ENSMUSG00000097365	0.925743	0	0.820448	-3.41985
Ccr5	ENSMUSG00000079227	0.828124	0	0.965372	-1.21986
Tnfrsf12a	ENSMUSG00000023905	0.919922	0	0	-0.694577
Mirt1	ENSMUSG00000097636	0.843284	0	0	-1.10597
Nr1d2	ENSMUSG00000021775	0.782159	0	0.834459	-0.768362
Fbxo30	ENSMUSG00000047648	0.855754	0	0.469544	-0.701519
Adrb2	ENSMUSG00000045730	0.73261	0	0	-0.745715
Gpr18	ENSMUSG00000050350	0.847815	0	1.8791	-0.931151
Avpi1	ENSMUSG00000018821	0.778156	0	0	-0.846129
Pde3b	ENSMUSG00000030671	0.869469	0	0	-1.22191
Sbno2	ENSMUSG00000035673	0.798482	0	0	-0.701085
Nanos1	ENSMUSG00000072437	0.842854	0	0	-0.599688
Tmem65	ENSMUSG00000062373	0.80088	0	0.776504	-0.839988
Ccr1	ENSMUSG00000025804	0.81803	0	0	-1.15134
Slc16a10	ENSMUSG00000019838	0.808454	0	0	-0.939453
Socs3	ENSMUSG00000053113	0.804165	0	1.86423	-1.30507
Acsl3	ENSMUSG00000032883	0.84421	0	1.01046	-1.0852
Bcl2l11	ENSMUSG00000027381	0.786831	0	0	-0.597891
F2rl2	ENSMUSG00000021675	0.734826	0	0	-1.10755
Il6	ENSMUSG00000025746	0.679589	0	0	-1.92667
Mex3a	ENSMUSG00000074480	0.837992	0	0	-0.654767
0610009L18Rik	ENSMUSG00000043644	0.791828	0	1.08571	-0.811931
Ppp1cc	ENSMUSG00000004455	0.808884	0	2.22279	-0.594996
Zfp281	ENSMUSG00000041483	0.764959	0	0	-0.719665
Frmd6	ENSMUSG00000048285	0.770301	0	0.728158	-0.694435
Il10	ENSMUSG00000016529	0.61961	0	2.62434	-0.969351
Frat1	ENSMUSG00000067199	0.800913	0	0	-0.899911
Paxbp1	ENSMUSG00000022974	0.751563	0	0	-0.69903
Gm26751	ENSMUSG00000097542	0.758674	0	0	-2.69169
Dmwd	ENSMUSG00000030410	0.772677	0	0.739452	-0.657511
Tdrkh	ENSMUSG00000041912	0.610988	0	0	-0.961489
Tmem86a	ENSMUSG00000010307	0.595343	0	0	-0.93149
Tubb2a	ENSMUSG00000058672	0.705686	0	0	-0.8415
A630023P12Rik	ENSMUSG00000048215	0.675586	0	0	-0.702559
Slc6a4	ENSMUSG00000020838	0.750273	0	0	-6.54925
Arl5a	ENSMUSG00000036093	0.618496	0	0	-1.39309
Sec14l1	ENSMUSG00000020823	0.723316	0	0	-0.729976
P2ry10	ENSMUSG00000050921	0.722059	0	0.874844	-0.726006
Ston2	ENSMUSG00000020961	0.586241	0	0	-0.850277
Pi4k2a	ENSMUSG00000025178	0.603425	0	0	-0.63252
Sccpdh	ENSMUSG00000038936	0.594979	0	0	-1.72968
F2r	ENSMUSG00000048376	0.723316	0	0	-1.12529
Rps6ka5	ENSMUSG00000021180	0.543206	0	0	-0.987955
Lmo4	ENSMUSG00000028266	0.702759	0	1.18702	-1.31406
Taf4b	ENSMUSG00000054321	0.462111	0	0.705313	-0.881135
P2ry2	ENSMUSG00000032860	0.621771	0	0	-1.44248
Lman1	ENSMUSG00000041891	0.616379	0	0	-0.633245
Gm13546	ENSMUSG00000086862	0.580492	0	0	-0.653443
Gpr146	ENSMUSG00000044197	0.620884	0	1.23815	-0.856244
Fnip2	ENSMUSG00000061175	0.657527	0	0	-0.766504
Vps37b	ENSMUSG00000066278	0.664936	0	1.34775	-0.771211
Slc37a2	ENSMUSG00000032122	0.614296	0	0.785156	-0.865843
Nme4	ENSMUSG00000024177	0.657527	0	0	-1.02639
Axin2	ENSMUSG00000000142	0.590238	0	1.12108	-0.669586
F2rl1	ENSMUSG00000021678	0.589273	0	0	-0.78861
Smtn	ENSMUSG00000020439	0.657527	0	0	-0.880464
Frat2	ENSMUSG00000047604	0.621606	0	0	-0.95111
Tspan2	ENSMUSG00000027858	0.594869	0	0	-0.799562
Raver2	ENSMUSG00000035275	0.616628	0	0	-0.754966
Specc1	ENSMUSG00000042331	0.553607	0	0	-1.33194
Camsap2	ENSMUSG00000041570	0.648265	0	0	-0.831362
Ccr7	ENSMUSG00000037944	0.63471	0	2.11103	-0.781619
St3gal6	ENSMUSG00000022747	0.559345	0	0	-0.795617
Actn1	ENSMUSG00000015143	0.562873	0	1.14679	-1.17717
Gm12534	ENSMUSG00000086517	0.332848	0	0	-2.61706
Bambi	ENSMUSG00000024232	0.42356	0	1.10045	-0.610178
Lama5	ENSMUSG00000015647	0.46904	0	0.677988	-0.754513
Map3k14	ENSMUSG00000020941	0.440148	0	0	-0.638102
Tspan5	ENSMUSG00000028152	0.51181	0	0	-0.768784
Sh3pxd2a	ENSMUSG00000053617	0.41776	0	0	-1.0457
Ccr2	ENSMUSG00000049103	0.461499	0	1.338	-1.57622
Vamp5	ENSMUSG00000073002	0.324645	0	0	-0.613065
Trpm6	ENSMUSG00000024727	0.48476	0	1.40263	-1.6532
Cysltr1	ENSMUSG00000052821	0.473622	0	1.69486	-2.0735
Camk4	ENSMUSG00000038128	0.442913	0	0	-0.978728
Arid5a	ENSMUSG00000037447	0.42141	0	0	-1.24047
Gpr183	ENSMUSG00000051212	0.372986	0	0	-0.796976
Stxbp1	ENSMUSG00000026797	0.384844	0	0	-0.874691
Arl5c	ENSMUSG00000038352	0.435054	0	0	-0.749129
Armcx6	ENSMUSG00000050394	0.321321	0	0	-0.680688
B230217O12Rik	ENSMUSG00000097785	0.330946	0	0	-0.613928
Prkd3	ENSMUSG00000024070	0.324149	0	0	-0.904788
Ppm1l	ENSMUSG00000027784	0.310885	0	0	-0.600931
Trib3	ENSMUSG00000032715	0.420567	0	0.543027	-0.589895
Palld	ENSMUSG00000058056	0.225251	0	0	-0.585287
Ehd3	ENSMUSG00000024065	0.233869	0	0	-1.65903
Tmem64	ENSMUSG00000043252	0.310406	0	0	-1.08336
Syne2	ENSMUSG00000063450	0.321944	0	0	-0.742327
Myh3	ENSMUSG00000020908	0.352843	0	0	-2.07859
Tnfrsf19	ENSMUSG00000060548	0.349982	0	0	-2.35704
Acvr2a	ENSMUSG00000052155	0.321321	0	0	-0.929853
Ap1m2	ENSMUSG00000003309	0.315516	0	0	-0.634579
Grn	ENSMUSG00000034708	0.321205	0	0	-0.820257
Gcnt1	ENSMUSG00000038843	0.302219	0	0	-0.664339
Gclc	ENSMUSG00000032350	0.299094	0	0	-0.929942
Il4ra	ENSMUSG00000030748	0.286244	0	0	-0.874842
Spock2	ENSMUSG00000058297	0.297093	0	0	-1.51031
Sgsh	ENSMUSG00000005043	0.313024	0	0.616364	-0.647052
Klf3	ENSMUSG00000029178	0.312718	0	0	-1.12255
Trp73	ENSMUSG00000029026	0.249876	0	0.860751	-2.39585
Tle1	ENSMUSG00000008305	0.155466	0	0	-0.630029
S1pr1	ENSMUSG00000045092	0.279882	0	2.68973	-1.07216
2210011C24Rik	ENSMUSG00000074217	0.234942	0	0	-1.08341
Vdr	ENSMUSG00000022479	0.209076	0	0	-1.46961
Pde8a	ENSMUSG00000025584	0.272616	0	0	-0.691685
Syt13	ENSMUSG00000027220	0.180415	0	0	-0.798558
Vsir	ENSMUSG00000020101	0.182425	0	0	-0.791124
Pag1	ENSMUSG00000027508	0.23507	0	0	-0.754399
Zcchc14	ENSMUSG00000061410	0.207676	0	0	-0.937335
Rasgrp2	ENSMUSG00000032946	0.156807	0	0	-0.673154
Stx1a	ENSMUSG00000007207	0.190785	0	0	-0.635486
Bmp2k	ENSMUSG00000034663	0.151364	0	0	-0.592574
Macrod1	ENSMUSG00000036278	0.107107	0	0	-0.606084
Peg12	ENSMUSG00000070526	0	0.889326	0	-0.822638
Myo6	ENSMUSG00000033577	0	0.849601	0	-3.61659
Prg4	ENSMUSG00000006014	0	0.948996	0	-0.961226
Nynrin	ENSMUSG00000075592	0	0.903847	0	-3.06339
Tmem2	ENSMUSG00000024754	0	0.871862	0	-0.92526
Padi4	ENSMUSG00000025330	0	0.427331	0	-3.86793
Lyst	ENSMUSG00000019726	0	0.442149	0	-0.701714
Frmd5	ENSMUSG00000027238	0	0.497288	0	-0.877288
Tcp11l2	ENSMUSG00000020034	0	0.471455	0	-0.67231
Prss16	ENSMUSG00000006179	0	0.435997	0	-0.721668
Plxnd1	ENSMUSG00000030123	0	0.435931	0	-0.75069
Tdrp	ENSMUSG00000050052	0	0.444663	0	-1.29644
Slc26a11	ENSMUSG00000039908	0	0.435931	1.31785	-1.92333
Rnf32	ENSMUSG00000029130	0	0.427331	0	-1.63939
Kcna2	ENSMUSG00000040724	0	0.301911	0	-1.28714
Pdlim4	ENSMUSG00000020388	0	0.327501	0	-0.644934
Zfp985	ENSMUSG00000065999	0	0.295571	0	-0.59799
Armcx2	ENSMUSG00000033436	0	0.301911	0	-0.593051
Sema6c	ENSMUSG00000038777	0	0.208985	0	-1.03889
Mpzl2	ENSMUSG00000032092	0	0	0	-2.08671
Slc29a4	ENSMUSG00000050822	0	0	0	-0.836145
Cd109	ENSMUSG00000046186	0	0	0	-1.21141
Bach2os	ENSMUSG00000086150	0	0	0	-1.15155
Cacna1i	ENSMUSG00000022416	0	0	0	-1.14587
Vipr1	ENSMUSG00000032528	0	0	0	-1.17565
Slc7a8	ENSMUSG00000022180	0	0	0	-1.86255
Col16a1	ENSMUSG00000040690	0	0	1.05208	-1.61787
Ptprf	ENSMUSG00000033295	0	0	0	-1.792
Trat1	ENSMUSG00000030775	0	0	0	-0.614292
Zbtb10	ENSMUSG00000069114	0	0	0	-0.892635
Sgtb	ENSMUSG00000042743	0	0	0	-1.42051
Hs3st3b1	ENSMUSG00000070407	0	0	0	-1.02304
Tlr12	ENSMUSG00000062545	0	0	0	-0.710638
Itga7	ENSMUSG00000025348	0	0	0	-1.0298
Magi1	ENSMUSG00000045095	0	0	0	-1.62691
Itgad	ENSMUSG00000070369	0	0	0	-1.50761
Il17a	ENSMUSG00000025929	0	0	0	-1.82681
Hmga2	ENSMUSG00000056758	0	0	0	-1.42224
Fam234a	ENSMUSG00000024187	0	0	0	-0.621509
Timd2	ENSMUSG00000040413	0	0	0	-1.43021
Scn4b	ENSMUSG00000046480	0	0	0	-0.831599
Mmp9	ENSMUSG00000017737	0	0	0	-2.62892
Pxdc1	ENSMUSG00000021411	0	0	0	-3.3619
Tgfb3	ENSMUSG00000021253	0	0	0	-2.77141
Adam8	ENSMUSG00000025473	0	0	0	-1.32761
Ecm1	ENSMUSG00000028108	0	0	0	-0.649788
Abcc5	ENSMUSG00000022822	0	0	0	-0.787076
Tm7sf3	ENSMUSG00000040234	0	0	0	-0.726625
Pcsk1	ENSMUSG00000021587	0	0	0	-2.35965
Unc5a	ENSMUSG00000025876	0	0	0	-0.765374
Rflnb	ENSMUSG00000020846	0	0	0	-1.34899
Gfra4	ENSMUSG00000027316	0	0	0	-5.28807
Rgs11	ENSMUSG00000024186	0	0	0	-0.775892
Ugcg	ENSMUSG00000028381	0	0	0	-1.3044
Dapl1	ENSMUSG00000026989	0	0	0	-2.17898
Cpne7	ENSMUSG00000034796	0	0	0	-2.42728
Pja1	ENSMUSG00000034403	0	0	0	-0.657601
Amigo2	ENSMUSG00000048218	0	0	0	-1.0672
Nectin1	ENSMUSG00000032012	0	0	0	-2.13548
Tmtc2	ENSMUSG00000036019	0	0	0.587204	-1.35011
Ldhd	ENSMUSG00000031958	0	0	0	-0.585709
Cntnap1	ENSMUSG00000017167	0	0	0.905529	-0.965547
Rapgef3	ENSMUSG00000022469	0	0	0	-0.828123
Maneal	ENSMUSG00000042763	0	0	0	-0.895481
Rundc3b	ENSMUSG00000040570	0	0	0	-0.926647
Jag1	ENSMUSG00000027276	0	0	0	-0.723438
Zscan10	ENSMUSG00000023902	0	0	0	-2.03551
Lair1	ENSMUSG00000055541	0	0	0	-0.994244
Dctpp1	ENSMUSG00000042462	0	0	0	-0.80169
Matn2	ENSMUSG00000022324	0	0	0	-2.96006
Irak3	ENSMUSG00000020227	0	0	0	-0.634326
Ppp1r14c	ENSMUSG00000040653	0	0	0	-0.88632
Gm527	ENSMUSG00000047227	0	0	0	-0.810818
Pik3c2a	ENSMUSG00000030660	0	0	0	-0.865054
Gm5127	ENSMUSG00000073010	0	0	0	-1.35826
Il5	ENSMUSG00000036117	0	0	0	-0.602405
Gm12474	ENSMUSG00000053957	0	0	0	-0.928621
Laptm4b	ENSMUSG00000022257	0	0	0	-0.750851
Areg	ENSMUSG00000029378	0	0	0	-0.590266

## Sheet: HDM_NonDE
Gene Symbol	ENSEMBL ID	ChIP-seq c-Maf Score	Motif c-Maf Score	-log10 (BETA score)	-log2 (FC RNA-seq)
Gstm4	ENSMUSG00000027890	0.994278	0.996725	0	0.183465
Cd4	ENSMUSG00000023274	0.568293	0.197169	0	0.16552
Acad11	ENSMUSG00000090150	0.97817	0.963583	0	0.267311
Zfp418	ENSMUSG00000034538	0.982172	0.975358	0	-0.0818632
Oasl2	ENSMUSG00000029561	0.969305	0.990276	0	0.177796
Ldhb	ENSMUSG00000030246	0.936493	0.987696	0	0.315551
Dzip3	ENSMUSG00000064061	0.873185	0.931499	0	0.180094
Rock2	ENSMUSG00000020580	0.972513	0.984884	0	-0.0361738
Ufl1	ENSMUSG00000040359	0.980055	0.962028	0	-0.0898022
Napa	ENSMUSG00000006024	0.92442	0.997288	0	-0.168653
Dnpep	ENSMUSG00000026209	0.90345	0.989779	0	0.18085
Gas2l3	ENSMUSG00000074802	0.955314	0.996858	0	-0.438412
Cox18	ENSMUSG00000035505	0.998115	0.949955	0	-0.0270939
Tatdn1	ENSMUSG00000050891	0.938445	0.997784	0	0.213277
Blmh	ENSMUSG00000020840	0.999967	0.996163	0	-0.023857
Memo1	ENSMUSG00000058704	0.97893	0.991069	0	-0.0946136
Zfp677	ENSMUSG00000062743	0.953925	0.989978	0	-0.213931
Fbxo5	ENSMUSG00000019773	0.961069	0.905732	0	-0.214861
Snrpc	ENSMUSG00000024217	0.992128	0.979592	0	-0.0869713
Bend6	ENSMUSG00000042182	0.932954	0.884299	0	0.355055
Calm2	ENSMUSG00000036438	0.936196	0.989118	0	-0.157763
Mki67	ENSMUSG00000031004	0.981345	0.952833	0	0.0389582
Serinc3	ENSMUSG00000017707	0.969636	0.977673	0	0.0872526
Cep120	ENSMUSG00000048799	0.954156	0.979195	0	-0.334721
Gnpda1	ENSMUSG00000052102	0.975027	0.975557	0	0.124667
Clca1	ENSMUSG00000028255	0.892799	0.922138	0	1.71233
Washc3	ENSMUSG00000020056	0.989978	0.963583	0	-0.0368945
Tcea1	ENSMUSG00000033813	0.984983	0.957728	0	-0.0256379
Dazap2	ENSMUSG00000000346	0.94678	0.931499	0	-0.138068
Myl12a	ENSMUSG00000024048	0.928191	0.998743	0	0.00387129
Papola	ENSMUSG00000021111	0.979526	0.988059	0	0.0248733
Rsad2	ENSMUSG00000020641	0.888036	0.983263	0	0.430244
AI314180	ENSMUSG00000050812	0.913241	0.987431	0	0.0377505
Rab39b	ENSMUSG00000031202	0.847121	0.984487	0	0.0549464
2300009A05Rik	ENSMUSG00000032403	0.993021	0.977442	0	-0.0819206
Mex3b	ENSMUSG00000057706	0.865313	0.969603	0	-0.138949
Zbtb6	ENSMUSG00000066798	0.993914	0.93646	0	-0.0329489
Adpgk	ENSMUSG00000025236	0.946515	0.931499	0	-0.304277
Tsc22d2	ENSMUSG00000027806	0.928026	0.996957	0	-0.20071
Gm12758	ENSMUSG00000085105	0.986075	0.957728	0	-0.0755831
Isy1	ENSMUSG00000030056	0.976053	0.905732	0	-0.348613
Fbxo7	ENSMUSG00000001786	0.961598	0.91969	0	-0.0921316
Ier5	ENSMUSG00000056708	0.955975	0.999173	0	-0.242924
Cacul1	ENSMUSG00000033417	0.910429	0.963583	0	-0.114021
Ndc80	ENSMUSG00000024056	0.968544	0.993319	0	-0.157249
Zfp963	ENSMUSG00000092260	0.984388	0.946118	0	-0.31848
Metap2	ENSMUSG00000036112	0.93646	0.941785	0	0.0485649
Fdps	ENSMUSG00000059743	0.962855	0.899183	0	0.150141
Rab43	ENSMUSG00000030055	0.960176	0.956339	0	-0.311058
Xrcc5	ENSMUSG00000026187	0.908345	0.972745	0	0.172722
Sdhaf3	ENSMUSG00000042505	0.908643	0.946118	0	0.284981
Swt1	ENSMUSG00000052748	0.958985	0.905732	0	0.0569367
Snx13	ENSMUSG00000020590	0.97043	0.963583	0	-0.112521
Fam168a	ENSMUSG00000029461	0.942976	0.979625	0	0.272787
Rab21	ENSMUSG00000020132	0.912943	0.994476	0	0.0104987
Tatdn2	ENSMUSG00000056952	0.860649	0.970132	0	-0.236843
Leng8	ENSMUSG00000035545	0.9271	0.952072	0	0.019566
Gpd1	ENSMUSG00000023019	0.903218	0.940859	0	1.34795
Ly96	ENSMUSG00000025779	0.934046	0.971951	0	-0.31696
Cox16	ENSMUSG00000091803	0.989945	0.975557	0	-0.261038
Xk	ENSMUSG00000015342	0.952601	0.952833	0	0.0532944
Sec24d	ENSMUSG00000039234	0.925181	0.884299	0	-0.129629
Zfp429	ENSMUSG00000078994	0.927926	0.980022	0	-0.127317
Pkn2	ENSMUSG00000004591	0.933186	0.854662	0	-0.242599
1700012B07Rik	ENSMUSG00000020617	0.871035	0.973506	0	0.105117
Prdx1	ENSMUSG00000028691	0.95366	0.960738	0	-0.157587
Bahd1	ENSMUSG00000040007	0.946449	0.947872	0	-0.122369
Irf9	ENSMUSG00000002325	0.916184	0.962921	0	0.167548
Eif3a	ENSMUSG00000024991	0.912811	0.975557	0	-0.0386422
Usp16	ENSMUSG00000025616	0.911388	0.939735	0	-0.103214
Zfp109	ENSMUSG00000074283	0.871035	0.854662	0	0.28686
Oit3	ENSMUSG00000009654	0.882744	0.977012	0	0.539379
Fam71b	ENSMUSG00000020401	0.938445	0.926306	0	0.617123
Lars	ENSMUSG00000024493	0.979393	0.934211	0	0.0402101
Smim20	ENSMUSG00000061461	0.922568	0.960738	0	0.0717825
Ccdc117	ENSMUSG00000020482	0.925247	0.996792	0	-0.034401
Tpt1	ENSMUSG00000060126	0.989746	0.871862	0	-0.270616
Gm26920	ENSMUSG00000058447	0.907617	0.975557	0	-0.00169046
Gm20605	ENSMUSG00000029720	0.857441	0.955479	0	-0.0163043
Setd5	ENSMUSG00000034269	0.889855	0.94291	0	-0.0994196
Ttpal	ENSMUSG00000017679	0.922122	0.982701	0	0.111978
Eif1ax	ENSMUSG00000067194	0.793074	0.973506	0	0.0162999
Clec2d	ENSMUSG00000030157	0.978566	0.902292	0	-0.250937
Zfp759	ENSMUSG00000057396	0.768961	0.99656	0	0.176302
Dimt1	ENSMUSG00000021692	0.977706	0.867793	0	-0.057519
Tex261	ENSMUSG00000014748	0.86217	0.988258	0	-0.0645745
Nufip2	ENSMUSG00000037857	0.949426	0.994609	0	-0.169656
Gstp1	ENSMUSG00000060803	0.979327	0.889326	0	-0.203454
Mrnip	ENSMUSG00000020381	0.9185	0.973506	0	-0.282718
Rps9	ENSMUSG00000006333	0.928654	0.992988	0	-0.217326
Psma3	ENSMUSG00000060073	0.921377	0.999272	0	-0.0153414
Zfp282	ENSMUSG00000025821	0.865511	0.94291	0	0.104279
Zfp87	ENSMUSG00000097333	0.967221	0.880363	0	-0.270211
A130010J15Rik	ENSMUSG00000079144	0.809612	0.997453	0	-0.293803
Cltc	ENSMUSG00000047126	0.998644	0.94291	0	-0.103158
Usp37	ENSMUSG00000033364	0.917276	0.877353	0	-0.123013
Pycard	ENSMUSG00000030793	0.934376	0.995005	0	0.180027
Hist2h2be	ENSMUSG00000068854	0.946978	0.972381	0	0.106822
Tars	ENSMUSG00000022241	0.857474	0.946118	0	0.0605386
Psme2	ENSMUSG00000079197	0.882347	0.905732	0	0.106458
Cep83	ENSMUSG00000020024	0.970231	0.867793	0	-0.116881
Sltm	ENSMUSG00000032212	0.974432	0.991466	0	-0.0484117
Timm13	ENSMUSG00000020219	0.949558	0.926306	0	-0.148605
Exosc3	ENSMUSG00000028322	0.911206	0.951096	0	0.16512
Gpr25	ENSMUSG00000052759	0.927728	0.976946	0	-0.358571
Tarsl2	ENSMUSG00000030515	0.874144	0.889326	0	0.0471004
Tmem18	ENSMUSG00000043061	0.933847	0.954321	0	-0.0736093
Zranb2	ENSMUSG00000028180	0.78411	0.968577	0	0.0968478
Alox8	ENSMUSG00000020891	0.857407	0.998048	0	0.125839
Cdt1	ENSMUSG00000006585	0.871035	0.982569	0	-0.219871
Zfp94	ENSMUSG00000074282	0.873317	0.983726	0	0.177585
Zfp266	ENSMUSG00000060510	0.965038	0.926306	0	-0.241286
Adnp2	ENSMUSG00000053950	0.906857	0.963583	0	-0.350815
Kbtbd7	ENSMUSG00000043881	0.917904	0.877353	0	0.0553488
Anks3	ENSMUSG00000022515	0.818179	0.940859	0	-0.080322
Usp1	ENSMUSG00000028560	0.863097	0.905732	0	-0.0932277
Ddx50	ENSMUSG00000020076	0.858301	0.954321	0	-0.117947
Kctd6	ENSMUSG00000021752	0.855258	0.926306	0	-0.421841
Atad2b	ENSMUSG00000052812	0.895115	0.956339	0	-0.0188513
Pbk	ENSMUSG00000022033	0.909734	0.98118	0	-0.0938655
Tox4	ENSMUSG00000016831	0.835478	0.952833	0	-0.0972452
Larp4	ENSMUSG00000023025	0.944365	0.923527	0	-0.317442
Nol11	ENSMUSG00000018433	0.986306	0.963351	0	0.104242
Cab39l	ENSMUSG00000021981	0.857474	0.905732	0	0.19987
Tmem55b	ENSMUSG00000035953	0.839381	0.963351	0	-0.323966
Tuba4a	ENSMUSG00000026202	0.889095	0.959051	0	-0.162277
Ppm1g	ENSMUSG00000029147	0.900208	0.952833	0	-0.00756799
1110008P14Rik	ENSMUSG00000039195	0.92141	0.956339	0	-0.058499
Rpl22l1	ENSMUSG00000039221	0.794033	0.963583	0	-0.283672
Ago3	ENSMUSG00000028842	0.98968	0.835941	0	-0.309678
Smim12	ENSMUSG00000042380	0.859872	0.912877	0	-0.080759
Gpat4	ENSMUSG00000031545	0.929713	0.867793	0	-0.107904
Gm16754	ENSMUSG00000097439	0.879866	0.982469	0	0.333798
Rabggtb	ENSMUSG00000038975	0.857242	0.91969	0	-0.0438293
Ndufaf6	ENSMUSG00000050323	0.851718	0.989746	0	0.138251
Yes1	ENSMUSG00000014932	0.95538	0.981047	0	-0.555853
Anapc16	ENSMUSG00000020107	0.909966	0.926306	0	-0.305005
Zfp871	ENSMUSG00000024298	0.849072	0.99054	0	-0.174905
Ssbp1	ENSMUSG00000029911	0.845268	0.889326	0	0.0292705
Spg7	ENSMUSG00000000738	0.985479	0.842722	0	-0.156504
Zfp146	ENSMUSG00000037029	0.9313	0.905732	0	-0.129821
Hist1h2bj	ENSMUSG00000069300	0.919327	0.889326	0	-0.114078
Zfp119b	ENSMUSG00000062101	0.937816	0.905732	0	0.19088
Herpud2	ENSMUSG00000008429	0.935468	0.871862	0	0.0228182
Calr	ENSMUSG00000003814	0.842887	0.889326	0	0.0123123
Ewsr1	ENSMUSG00000009079	0.96226	0.959911	0	-0.0650208
Cbfb	ENSMUSG00000031885	0.845268	0.975557	0	-0.0280028
Wdr74	ENSMUSG00000042729	0.82572	0.984818	0	-0.116222
Wars	ENSMUSG00000021266	0.779612	0.905732	0	0.0708606
Ssb	ENSMUSG00000068882	0.860649	0.983958	0	-0.0384006
4930427A07Rik	ENSMUSG00000037466	0.87507	0.884299	0	0.140348
Lactb2	ENSMUSG00000025937	0.837578	0.848692	0	0.19306
Spty2d1	ENSMUSG00000049516	0.928555	0.854662	0	0.175742
Nckap1	ENSMUSG00000027002	0.835345	0.926306	0	0.0572188
Pigb	ENSMUSG00000079469	0.887639	0.963583	0	0.0049417
Ggps1	ENSMUSG00000021302	0.875434	0.905732	0	0.113407
Zbtb24	ENSMUSG00000019826	0.970694	0.849601	0	0.0685672
C87436	ENSMUSG00000046679	0.843697	0.943836	0	-0.0144041
Fam83d	ENSMUSG00000027654	0.990474	0.867793	0	0.0354807
P2ry1	ENSMUSG00000027765	0.944035	0.923527	0	-0.986017
Slc39a13	ENSMUSG00000002105	0.888036	0.963583	0	0.119867
Slc25a16	ENSMUSG00000071253	0.890881	0.854662	0	-0.0408173
Trim27	ENSMUSG00000021326	0.904045	0.930275	0	-0.047161
Mrpl3	ENSMUSG00000032563	0.789005	0.954321	0	-0.0259803
Tlr9	ENSMUSG00000045322	0.835478	0.957464	0	-0.835787
H2-T22	ENSMUSG00000056116	0.794794	0.982933	0	0.288468
Rabl3	ENSMUSG00000022827	0.846459	0.905732	0	0.209735
Zfp324	ENSMUSG00000004500	0.921807	0.889326	0	0.201927
Ftsj3	ENSMUSG00000020706	0.988291	0.867793	0	-0.0244938
Yrdc	ENSMUSG00000028889	0.852347	0.923527	0	-0.23124
Sdr42e1	ENSMUSG00000034308	0.78884	0.955479	0	0.17281
Hnrnph3	ENSMUSG00000020069	0.845268	0.963583	0	-0.0254214
Bloc1s6	ENSMUSG00000005804	0.85238	0.905732	0	0.0813207
Ndufv2	ENSMUSG00000024099	0.92485	0.842722	0	0.0836611
Eed	ENSMUSG00000030619	0.828565	0.998809	0	-0.0910026
Zfp668	ENSMUSG00000049728	0.889558	0.930275	0	0.039203
Fkbp2	ENSMUSG00000056629	0.852578	0.922138	0	-0.0521972
Zdhhc5	ENSMUSG00000034075	0.853868	0.905732	0	-0.0493908
Cct2	ENSMUSG00000034024	0.782522	0.976846	0	-0.0646811
Ypel5	ENSMUSG00000039770	0.861608	0.871862	0	-0.176671
Uba5	ENSMUSG00000032557	0.798267	0.999074	0	0.0274565
Fbxo3	ENSMUSG00000027180	0.758542	0.963583	0	0.0542844
Tiprl	ENSMUSG00000040843	0.759104	0.947872	0	-0.0668844
Ints7	ENSMUSG00000037461	0.892954	0.910451	0	-0.0558183
Letm1	ENSMUSG00000005299	0.814077	0.930275	0	-0.0162192
Pofut2	ENSMUSG00000020260	0.846459	0.871862	0	0.0962966
Pomt2	ENSMUSG00000034126	0.971687	0.835941	0	0.191073
Gdi1	ENSMUSG00000015291	0.751001	0.98151	0	-0.086636
Fdx1l	ENSMUSG00000079677	0.854331	0.962028	0	-0.144851
Papss1	ENSMUSG00000028032	0.785499	0.905732	0	0.110778
Tbk1	ENSMUSG00000020115	0.813846	0.962028	0	-0.215763
Fkbp3	ENSMUSG00000020949	0.866024	0.889326	0	0.0710513
Fam84b	ENSMUSG00000072568	0.735355	0.949955	0	-0.40962
Hddc3	ENSMUSG00000030532	0.773923	0.940859	0	0.200554
Gm16794	ENSMUSG00000097777	0.826249	0.993319	0	-0.0340089
Hspa5	ENSMUSG00000026864	0.863163	0.880363	0	-0.123
Phf11b	ENSMUSG00000091649	0.952668	0.905732	0	0.539281
Atp6v1h	ENSMUSG00000033793	0.769689	0.963583	0	-0.0499029
Ube4a	ENSMUSG00000059890	0.855869	0.922254	0	0.0242707
Lsm14a	ENSMUSG00000066568	0.902259	0.905732	0	-0.0485554
E230001N04Rik	ENSMUSG00000066170	0.903218	0.957728	0	0.0136445
Zfp354c	ENSMUSG00000044807	0.929746	0.854662	0	-0.373719
B230219D22Rik	ENSMUSG00000045767	0.908544	0.960738	0	-0.121673
Ifit1	ENSMUSG00000034459	0.935104	0.867793	0	0.406282
Kifc1	ENSMUSG00000079553	0.821156	0.889326	0	0.115953
Fem1b	ENSMUSG00000032244	0.947739	0.842722	0	-0.0982911
Iba57	ENSMUSG00000049287	0.792478	0.962921	0	-0.209967
Dstyk	ENSMUSG00000042046	0.749413	0.905732	0	0.0424548
Plk2	ENSMUSG00000021701	0.818377	0.940859	0	0.247701
Mtpap	ENSMUSG00000024234	0.994642	0.884299	0	-0.0843637
6430571L13Rik	ENSMUSG00000037977	0.860649	0.937486	0	-0.256425
Tmem126a	ENSMUSG00000030615	0.829822	0.952833	0	0.177247
Poldip2	ENSMUSG00000001100	0.90947	0.952833	0	-0.0471644
Noc3l	ENSMUSG00000024999	0.887176	0.889326	0	0.0798495
Slc25a32	ENSMUSG00000022299	0.777329	0.963583	0	-0.0699473
Ddx18	ENSMUSG00000001674	0.760791	0.889326	0	0.04317
Ly6e	ENSMUSG00000022587	0.881983	0.94291	0	0.329626
Ap2m1	ENSMUSG00000022841	0.845268	0.889326	0	-0.0148846
Preb	ENSMUSG00000045302	0.861807	0.987662	0	0.0265039
Ormdl1	ENSMUSG00000026097	0.826746	0.962028	0	0.149346
Zfp950	ENSMUSG00000074733	0.885126	0.842722	0	-0.150842
Papd4	ENSMUSG00000042167	0.8069	0.835941	0	-0.0933329
Vps25	ENSMUSG00000078656	0.922105	0.930275	0	-1.51742
P4hb	ENSMUSG00000025130	0.856547	0.980253	0	-0.034577
Mrps34	ENSMUSG00000038880	0.840472	0.930275	0	-0.105808
Psmd1	ENSMUSG00000026229	0.931036	0.889326	0	0.158871
U2surp	ENSMUSG00000032407	0.8756	0.849601	0	0.0332731
Hmgcr	ENSMUSG00000021670	0.780306	0.954321	0	0.0137338
Nt5dc1	ENSMUSG00000039480	0.670956	0.973506	0	0.0810409
Faim	ENSMUSG00000032463	0.795488	0.968577	0	0.0510336
Cxx1c	ENSMUSG00000051851	0.95108	0.867793	0	0.0295723
Gdap2	ENSMUSG00000027865	0.756061	0.877353	0	-0.0509666
Ubap2	ENSMUSG00000028433	0.930595	0.927309	0	-0.146525
Sqstm1	ENSMUSG00000015837	0.827341	0.993815	0	-0.144282
2410002F23Rik	ENSMUSG00000045411	0.860649	0.899183	0	-0.233503
Far1	ENSMUSG00000030759	0.824331	0.880363	0	-0.103542
Trim33	ENSMUSG00000033014	0.756425	0.983263	0	0.00712259
H2afx	ENSMUSG00000049932	0.963781	0.880363	0	-0.137829
Pole3	ENSMUSG00000028394	0.88152	0.922138	0	-0.127258
Atp9a	ENSMUSG00000027546	0.768696	0.939735	0	0.180131
Nedd1	ENSMUSG00000019988	0.830252	0.877353	0	-0.000300766
2310058D17Rik	ENSMUSG00000085379	0.819998	0.962028	0	-0.251459
Eif4a1	ENSMUSG00000059796	0.898455	0.867793	0	0.0400708
Smndc1	ENSMUSG00000025024	0.78497	0.946118	0	-0.143042
Slc35d3	ENSMUSG00000050473	0.853273	0.997189	0	-0.610499
Zfp799	ENSMUSG00000095253	0.82486	0.99054	0	-0.101398
Sec22b	ENSMUSG00000027879	0.834055	0.926306	0	0.0600631
Elob	ENSMUSG00000055839	0.95495	0.880363	0	-0.00927763
Mettl4	ENSMUSG00000055660	0.681573	0.962028	0	0.0158513
Med28	ENSMUSG00000015804	0.670096	0.991532	0	-0.00780133
Ube2m	ENSMUSG00000005575	0.859061	0.922138	0	-0.078858
Mlh1	ENSMUSG00000032498	0.788642	0.940859	0	0.116948
Dusp23	ENSMUSG00000026544	0.653425	0.955479	0	0.249285
Zfp110	ENSMUSG00000058638	0.81454	0.903847	0	-0.167856
Prkci	ENSMUSG00000037643	0.85238	0.905732	0	-0.169297
Tbc1d10c	ENSMUSG00000040247	0.945341	0.884514	0	-0.0608199
Prkdc	ENSMUSG00000022672	0.813151	0.923527	0	0.147794
Zfp456	ENSMUSG00000078995	0.901366	0.854662	0	-0.170787
Ldah	ENSMUSG00000037669	0.736282	0.938081	0	0.18035
Tpbg	ENSMUSG00000035274	0.973373	0.835941	0	-0.253193
Rbm45	ENSMUSG00000042369	0.753035	0.958125	0	-0.0123679
Ube3a	ENSMUSG00000025326	0.766943	0.905732	0	0.058446
Mrps2	ENSMUSG00000035772	0.802534	0.884299	0	0.0591545
Slc35f5	ENSMUSG00000026342	0.911487	0.854662	0	0.368622
Poc5	ENSMUSG00000021671	0.845268	0.854662	0	-0.0179831
Sod1	ENSMUSG00000022982	0.741243	0.963583	0	0.00315878
5430403G16Rik	ENSMUSG00000072763	0.810174	0.849601	0	0.0132504
Eml3	ENSMUSG00000071647	0.858863	0.975557	0	0.0477009
Rubcn	ENSMUSG00000035629	0.994609	0.854662	0	-0.121018
Vps37a	ENSMUSG00000031600	0.837694	0.926306	0	0.0629887
Mlf2	ENSMUSG00000030120	0.673072	0.980617	0	0.0802717
Rangap1	ENSMUSG00000022391	0.918996	0.849601	0	0.023695
Txnl1	ENSMUSG00000024583	0.784242	0.899183	0	0.0317042
Yars2	ENSMUSG00000022792	0.795488	0.952833	0	-0.0559164
Zfp777	ENSMUSG00000071477	0.853703	0.934211	0	-0.152316
Taf13	ENSMUSG00000048100	0.849072	0.867793	0	-0.0063956
Tmem230	ENSMUSG00000027341	0.871035	0.905732	0	0.235673
2410089E03Rik	ENSMUSG00000039801	0.876426	0.854662	0	-0.0324226
Ndufs7	ENSMUSG00000020153	0.90173	0.903847	0	0.120323
Them4	ENSMUSG00000028145	0.805081	0.849601	0	-0.152835
H2-K1	ENSMUSG00000061232	0.90173	0.842722	0	0.2132
Atp2a3	ENSMUSG00000020788	0.850164	0.963583	0	-0.0201264
Emc2	ENSMUSG00000022337	0.605067	0.993385	0	0.0560023
Sec61a2	ENSMUSG00000025816	0.802071	0.835941	0	-0.123055
Psma7	ENSMUSG00000027566	0.903086	0.854662	0	0.00755875
Aspm	ENSMUSG00000033952	0.807892	0.884299	0	0.0352218
Zfp719	ENSMUSG00000030469	0.831575	0.880363	0	0.29686
Eprs	ENSMUSG00000026615	0.749479	0.931499	0	-0.0347107
Ulk2	ENSMUSG00000004798	0.973373	0.835941	0	-0.210261
Sumo3	ENSMUSG00000020265	0.908081	0.835941	0	0.0144986
A230056P14Rik	ENSMUSG00000087178	0.834287	0.91969	0	0.011624
Cwc25	ENSMUSG00000018541	0.843416	0.930275	0	-0.144373
Nmrk1	ENSMUSG00000037847	0.905352	0.899762	0	-0.218817
Il1rl1	ENSMUSG00000026069	0.932425	0.849601	0	-0.555747
Metap1d	ENSMUSG00000041921	0.816657	0.880363	0	-0.144379
Dus1l	ENSMUSG00000025155	0.896074	0.905732	0	-0.0749311
Asb6	ENSMUSG00000039483	0.962061	0.854662	0	-0.277282
Glce	ENSMUSG00000032252	0.81077	0.854662	0	-0.234878
Fam208a	ENSMUSG00000040651	0.863791	0.905732	0	-0.0831219
Mylpf	ENSMUSG00000030672	0.864519	0.854662	0	-0.125596
Kctd5	ENSMUSG00000016946	0.914828	0.899183	0	-0.0543299
Dnajc18	ENSMUSG00000024350	0.877981	0.950385	0	-0.0252222
Map1s	ENSMUSG00000019261	0.89141	0.946118	0	0.00950745
Apeh	ENSMUSG00000032590	0.788708	0.968577	0	0.177184
Atf5	ENSMUSG00000038539	0.846823	0.91969	0	0.178465
Ascc2	ENSMUSG00000020412	0.803179	0.920468	0	0.135225
Nlrc3	ENSMUSG00000049871	0.733735	0.987232	0	-0.00901189
Riok3	ENSMUSG00000024404	0.703073	0.957662	0	-0.231711
Spag7	ENSMUSG00000018287	0.886416	0.884299	0	0.0583624
Bet1	ENSMUSG00000032757	0.683525	0.971753	0	0.0845619
Vprbp	ENSMUSG00000040325	0.93044	0.854662	0	-0.16249
Washc5	ENSMUSG00000022350	0.891344	0.928489	0	-0.0881106
Kif18b	ENSMUSG00000051378	0.841035	0.963583	0	-0.102181
Atp13a1	ENSMUSG00000031862	0.855489	0.962921	0	-0.0223008
Lrrc58	ENSMUSG00000034158	0.765422	0.970562	0	-0.171476
Utp4	ENSMUSG00000041438	0.835478	0.952072	0	-0.116839
Gm26816	ENSMUSG00000097380	0.795488	0.946118	0	0.0694022
Smim7	ENSMUSG00000044600	0.8069	0.889326	0	-0.185321
Kcnk7	ENSMUSG00000024936	0.738862	0.946118	0	0.564983
Zfp398	ENSMUSG00000062519	0.745907	0.948996	0	0.04887
Rasip1	ENSMUSG00000044562	0.739126	0.880363	0	0.52613
Pole4	ENSMUSG00000030042	0.723845	0.922601	0	-0.124371
Ndufs5	ENSMUSG00000028648	0.827771	0.835941	0	0.0765025
Scyl3	ENSMUSG00000026584	0.827672	0.889326	0	-0.0384289
Slc29a2	ENSMUSG00000024891	0.884199	0.867793	0	-0.123669
Sigmar1	ENSMUSG00000036078	0.719016	0.94291	0	0.0701927
Pomp	ENSMUSG00000029649	0.818013	0.905732	0	0.0209611
Camta2	ENSMUSG00000040712	0.897959	0.867793	0	0.123309
Ccdc94	ENSMUSG00000003208	0.79142	0.889326	0	-0.0690849
Spcs2	ENSMUSG00000035227	0.928985	0.884299	0	0.130031
Pqlc3	ENSMUSG00000045679	0.798267	0.889326	0	0.254164
Pold2	ENSMUSG00000020471	0.728277	0.934211	0	0.116156
Prdx5	ENSMUSG00000024953	0.878609	0.928489	0	0.14284
Mycbp2	ENSMUSG00000033004	0.864056	0.842722	0	0.301415
Ppfia1	ENSMUSG00000037519	0.667648	0.963583	0	-0.0556126
Odc1	ENSMUSG00000011179	0.657527	0.987199	0	-0.462506
Zfp235	ENSMUSG00000047603	0.66262	0.991367	0	0.369639
Tpm3	ENSMUSG00000027940	0.901135	0.842722	0	-0.0879234
Slc22a17	ENSMUSG00000022199	0.865313	0.923527	0	0.134278
5730405O15Rik	ENSMUSG00000087424	0.808884	0.884299	0	0.444889
Lyrm1	ENSMUSG00000030922	0.709655	0.983263	0	-0.0686031
Fbxo22	ENSMUSG00000032309	0.759104	0.928489	0	0.0274738
Med8	ENSMUSG00000006392	0.852843	0.854662	0	-0.0663604
Ctsz	ENSMUSG00000016256	0.785169	0.926306	0	-0.054322
Ddx39b	ENSMUSG00000019432	0.890385	0.905732	0	-0.0314973
Zfp445	ENSMUSG00000047036	0.819998	0.980022	0	-0.0076886
Zfp410	ENSMUSG00000042472	0.898125	0.905732	0	-0.0875365
Add1	ENSMUSG00000029106	0.740151	0.963583	0	-0.0517018
Psmd4	ENSMUSG00000005625	0.907584	0.835941	0	-0.0457237
Trnt1	ENSMUSG00000013736	0.707604	0.950385	0	-0.351279
Rbbp8	ENSMUSG00000041238	0.758079	0.963583	0	-0.111507
Tmem168	ENSMUSG00000029569	0.801806	0.884299	0	0.0265871
G430095P16Rik	ENSMUSG00000074203	0.765323	0.905732	0	-0.236011
2810428I15Rik	ENSMUSG00000058833	0.86829	0.871862	0	0.0243041
Coq10b	ENSMUSG00000025981	0.743724	0.950385	0	-0.276861
Mob4	ENSMUSG00000025979	0.805081	0.948996	0	-0.118614
Hagh	ENSMUSG00000024158	0.843052	0.905732	0	-0.16333
Pgghg	ENSMUSG00000062031	0.810174	0.973142	0	-0.155965
Zfp27	ENSMUSG00000062040	0.828763	0.948996	0	0.158383
Brca1	ENSMUSG00000017146	0.773393	0.877353	0	0.0908687
Rrm1	ENSMUSG00000030978	0.714716	0.950385	0	-0.0541947
Mrpl20	ENSMUSG00000029066	0.869778	0.880197	0	-0.10477
Dbnl	ENSMUSG00000020476	0.818906	0.835941	0	0.00303488
Trp53i13	ENSMUSG00000044328	0.889095	0.905732	0	0.0842094
Sephs2	ENSMUSG00000049091	0.748917	0.905732	0	0.173609
Fopnl	ENSMUSG00000022677	0.68541	0.903847	0	-0.104318
Lrp10	ENSMUSG00000022175	0.839315	0.899183	0	-0.0289552
Neil1	ENSMUSG00000032298	0.748619	0.854662	0	-0.0444803
Etfa	ENSMUSG00000032314	0.679291	0.98753	0	0.225319
Pitpna	ENSMUSG00000017781	0.786293	0.959911	0	0.00726257
Parp2	ENSMUSG00000036023	0.81454	0.835941	0	-0.0401735
1700023H06Rik	ENSMUSG00000089827	0.816227	0.934211	0	0.256032
Tmem14c	ENSMUSG00000021361	0.723117	0.922138	0	-0.105553
Rnf103	ENSMUSG00000052656	0.835478	0.884299	0	-0.184038
Ddx3x	ENSMUSG00000000787	0.759667	0.889326	0	-0.165316
Rab33b	ENSMUSG00000027739	0.781001	0.867793	0	-0.200557
Slc30a5	ENSMUSG00000021629	0.682036	0.926306	0	0.0049088
Cul5	ENSMUSG00000032030	0.763967	0.978368	0	0.0799055
Atp5g3	ENSMUSG00000018770	0.884563	0.842722	0	-0.0102339
H2-DMa	ENSMUSG00000037649	0.765323	0.946118	0	0.52961
Gphn	ENSMUSG00000047454	0.771045	0.880363	0	0.148096
Ficd	ENSMUSG00000053334	0.665266	0.905732	0	0.0493984
Slc35b2	ENSMUSG00000037089	0.869679	0.835941	0	0.0628332
Casc4	ENSMUSG00000060227	0.777561	0.922138	0	0.12212
Pnpla7	ENSMUSG00000036833	0.825158	0.884299	0	-0.171167
Grpel2	ENSMUSG00000024580	0.699964	0.969206	0	-0.119743
Cers5	ENSMUSG00000023021	0.721	0.94291	0	0.174378
Sprtn	ENSMUSG00000031986	0.770681	0.939735	0	-0.189552
Pigs	ENSMUSG00000041958	0.68369	0.980948	0	0.132806
2410131K14Rik	ENSMUSG00000032840	0.605993	0.987993	0	-0.175652
Spc25	ENSMUSG00000005233	0.624053	0.889326	0	-0.14024
Prkab2	ENSMUSG00000038205	0.723216	0.889326	0	0.0437961
Chka	ENSMUSG00000024843	0.842556	0.854662	0	-0.0273499
Ap1g2	ENSMUSG00000040701	0.788427	0.887954	0	0.180868
Crat	ENSMUSG00000026853	0.857044	0.884299	0	0.035448
Ppdpf	ENSMUSG00000016344	0.765323	0.950385	0	0.14368
Serpini1	ENSMUSG00000027834	0.66262	0.931499	0	-0.254155
Cltb	ENSMUSG00000047547	0.729699	0.978996	0	-0.201316
Npepl1	ENSMUSG00000039263	0.704826	0.947872	0	0.0492106
Lamp1	ENSMUSG00000031447	0.900142	0.871862	0	-0.0958017
Myo19	ENSMUSG00000020527	0.802534	0.963583	0	0.204734
Rnf34	ENSMUSG00000029474	0.723316	0.931499	0	0.00994682
Thbs3	ENSMUSG00000028047	0.713988	0.980617	0	0.505398
Snapc5	ENSMUSG00000032398	0.821156	0.947872	0	0.0364765
BC004004	ENSMUSG00000052712	0.771309	0.942381	0	0.168759
Uevld	ENSMUSG00000043262	0.830252	0.835941	0	-0.0839108
Mvb12a	ENSMUSG00000031813	0.795488	0.849601	0	0.192959
Dync2h1	ENSMUSG00000047193	0.728277	0.905732	0	0.151909
Fam160b2	ENSMUSG00000022095	0.747064	0.905732	0	0.0324615
Rbm26	ENSMUSG00000022119	0.746502	0.905732	0	0.0195841
Dennd6a	ENSMUSG00000040818	0.857474	0.849601	0	-0.250418
Zkscan17	ENSMUSG00000020472	0.700741	0.948434	0	0.0677052
Mrfap1	ENSMUSG00000055302	0.740052	0.970132	0	0.00682633
Uxs1	ENSMUSG00000057363	0.838642	0.906261	0	0.148326
Cul2	ENSMUSG00000024231	0.616909	0.952833	0	-0.107039
Ahsa1	ENSMUSG00000021037	0.784573	0.854662	0	-0.0332874
Filip1l	ENSMUSG00000043336	0.699964	0.963583	0	0.188239
Cwc27	ENSMUSG00000021715	0.807528	0.950385	0	0.205999
Gm26848	ENSMUSG00000097723	0.570172	0.977574	0	0.296812
Rbx1	ENSMUSG00000022400	0.817782	0.854662	0	-0.0852466
Orc5	ENSMUSG00000029012	0.679589	0.842722	0	-0.181514
Fam53a	ENSMUSG00000037339	0.707307	0.944994	0	0.111415
Ap3s2	ENSMUSG00000063801	0.777164	0.884299	0	0.0951758
Rab5b	ENSMUSG00000000711	0.695234	0.905732	0	0.136836
AW209491	ENSMUSG00000039182	0.719016	0.871862	0	-0.0570435
Lysmd4	ENSMUSG00000043831	0.641981	0.923527	0	0.137851
Tmem222	ENSMUSG00000028857	0.782555	0.972877	0	-0.216653
Eno2	ENSMUSG00000004267	0.719016	0.946118	0	0.102632
Suv39h2	ENSMUSG00000026646	0.751001	0.923527	0	-0.13458
Mrpl49	ENSMUSG00000007338	0.753151	0.889326	0	-0.0761067
Tial1	ENSMUSG00000030846	0.793074	0.884299	0	0.0424566
Hsh2d	ENSMUSG00000062007	0.734396	0.952833	0	0.200575
Elovl1	ENSMUSG00000006390	0.632003	0.928356	0	0.00755088
Fez2	ENSMUSG00000056121	0.764926	0.871994	0	-0.456749
Srsf7	ENSMUSG00000024097	0.865677	0.835941	0	-0.0819924
Narf	ENSMUSG00000000056	0.715774	0.995733	0	-0.215778
Alg3	ENSMUSG00000033809	0.789402	0.93646	0	0.248794
Got2	ENSMUSG00000031672	0.774882	0.835941	0	0.0427964
Gm15541	ENSMUSG00000087371	0.714716	0.973192	0	0.0862326
Usp34	ENSMUSG00000056342	0.755102	0.854662	0	-0.0706996
Nmd3	ENSMUSG00000027787	0.686468	0.902292	0	-0.214655
Zc3hav1l	ENSMUSG00000047749	0.789435	0.934211	0	-0.00716195
Klhl36	ENSMUSG00000031828	0.624053	0.998512	0	0.364398
Plcb2	ENSMUSG00000040061	0.782886	0.910545	0	-0.214189
Bnip3	ENSMUSG00000078566	0.627956	0.926306	0	-0.415038
M6pr	ENSMUSG00000007458	0.605497	0.923527	0	0.00555808
Mtdh	ENSMUSG00000022255	0.770913	0.842722	0	-0.0383755
Hnrnph1	ENSMUSG00000007850	0.900771	0.835941	0	-0.0887371
Pdf	ENSMUSG00000078931	0.771243	0.889326	0	-1.16396
Faap20	ENSMUSG00000073684	0.879139	0.835941	0	0.0532803
Tmem106b	ENSMUSG00000029571	0.790262	0.849601	0	0.210296
Sh3d21	ENSMUSG00000073758	0.59951	0.995303	0	0.452309
Cdkl2	ENSMUSG00000029403	0.811365	0.842722	0	0.417994
Vbp1	ENSMUSG00000031197	0.584791	0.923527	0	0.0364017
Ranbp1	ENSMUSG00000005732	0.702874	0.985182	0	-0.0409978
Mrpl30	ENSMUSG00000026087	0.901366	0.835941	0	-0.175685
Gpatch3	ENSMUSG00000028850	0.79142	0.905732	0	-0.219341
Polr1c	ENSMUSG00000067148	0.857474	0.849601	0	0.0497096
Zdhhc24	ENSMUSG00000006463	0.739126	0.977673	0	-0.204824
Ndufb8	ENSMUSG00000025204	0.71594	0.950385	0	-0.0224918
Cep57l1	ENSMUSG00000019813	0.727086	0.899183	0	0.31314
Ttll12	ENSMUSG00000016757	0.775775	0.932392	0	-0.198013
Zfp68	ENSMUSG00000058291	0.611451	0.903847	0	-0.124928
Pfdn5	ENSMUSG00000001289	0.753184	0.946118	0	-0.16914
Mphosph6	ENSMUSG00000031843	0.66262	0.931499	0	0.252869
Zfp706	ENSMUSG00000062397	0.731155	0.867793	0	0.114944
Fech	ENSMUSG00000024588	0.704561	0.884299	0	-0.268
Ap5z1	ENSMUSG00000039623	0.678133	0.955479	0	0.0482594
Tap1	ENSMUSG00000037321	0.848047	0.880363	0	0.218857
Itch	ENSMUSG00000027598	0.763967	0.889326	0	-0.103208
Gpx3	ENSMUSG00000018339	0.786723	0.905732	0	1.12876
Mrpl53	ENSMUSG00000030037	0.734495	0.992492	0	0.0365275
Prr14l	ENSMUSG00000054280	0.697516	0.923527	0	0.0377884
Ercc5	ENSMUSG00000026048	0.721	0.849601	0	0.236312
Tmem80	ENSMUSG00000025505	0.643403	0.871862	0	-0.0168802
Zfp729a	ENSMUSG00000021510	0.655013	0.995138	0	-0.244182
Pdss1	ENSMUSG00000026784	0.714716	0.930275	0	0.02406
Atg3	ENSMUSG00000022663	0.631992	0.962921	0	0.0114078
Gzf1	ENSMUSG00000027439	0.624053	0.905732	0	-0.0237484
Rogdi	ENSMUSG00000022540	0.572487	0.986339	0	0.144038
Srr	ENSMUSG00000001323	0.774518	0.957728	0	0.0741532
Sike1	ENSMUSG00000027854	0.572487	0.939735	0	-0.0777756
Mien1	ENSMUSG00000002580	0.636953	0.959911	0	-0.0503356
Zc3h6	ENSMUSG00000042851	0.719611	0.871862	0	-0.0713903
Mtx2	ENSMUSG00000027099	0.636953	0.988721	0	0.0801243
Cry2	ENSMUSG00000068742	0.742864	0.867793	0	0.00142245
Polg	ENSMUSG00000039176	0.696292	0.884299	0	-0.173462
Selenot	ENSMUSG00000075700	0.743823	0.905732	0	-0.239213
Sac3d1	ENSMUSG00000024790	0.721662	0.902292	0	0.138429
Vim	ENSMUSG00000026728	0.870952	0.741367	0	0.0815522
Lmbr1l	ENSMUSG00000022999	0.654186	0.889326	0	-0.331116
Tspyl3	ENSMUSG00000074671	0.682863	0.854662	0	0.245234
Tlk2	ENSMUSG00000020694	0.822743	0.884299	0	-0.133782
Phf1	ENSMUSG00000024193	0.706943	0.91969	0	-0.126615
Kdelc1	ENSMUSG00000026047	0.645024	0.986373	0	0.20004
Srbd1	ENSMUSG00000024135	0.603165	0.982271	0	0.104471
Smarcc2	ENSMUSG00000025369	0.743823	0.905732	0	0.180487
Rplp2	ENSMUSG00000025508	0.655013	0.94291	0	-0.325712
Gtf2h3	ENSMUSG00000029387	0.728012	0.963583	0	0.23446
Usp28	ENSMUSG00000032267	0.671849	0.889326	0	-0.368536
Cln8	ENSMUSG00000026317	0.651242	0.91969	0	-0.13529
Mterf2	ENSMUSG00000049038	0.610988	0.963583	0	0.343695
Rfwd3	ENSMUSG00000033596	0.630238	0.934211	0	0.0274388
Ift52	ENSMUSG00000017858	0.718387	0.905732	0	0.200053
Sgcb	ENSMUSG00000029156	0.710912	0.842722	0	-0.284861
Gm17039	ENSMUSG00000092103	0.635431	0.997354	0	-0.124796
Arfgef2	ENSMUSG00000074582	0.780141	0.93646	0	0.0293828
Cops7a	ENSMUSG00000030127	0.786723	0.849601	0	0.111656
Ptpn9	ENSMUSG00000032290	0.816624	0.889326	0	0.0647036
Map2k1	ENSMUSG00000004936	0.670096	0.854662	0	0.172305
Sugp1	ENSMUSG00000011306	0.753316	0.905732	0	0.0767111
Tc2n	ENSMUSG00000021187	0.590944	0.938081	0	-0.33913
Dad1	ENSMUSG00000022174	0.661678	0.956984	0	-0.138389
Siva1	ENSMUSG00000064326	0.622995	0.880363	0	0.0690013
Birc5	ENSMUSG00000017716	0.749115	0.934211	0	-0.210076
Acsl1	ENSMUSG00000018796	0.632256	0.905732	0	-0.315352
Pigq	ENSMUSG00000025728	0.790295	0.835941	0	0.0188376
Zfp263	ENSMUSG00000022529	0.630238	0.940859	0	-0.126048
9430091E24Rik	ENSMUSG00000084808	0.761486	0.889326	0	0.0748145
Pcnp	ENSMUSG00000071533	0.738564	0.871862	0	-0.0845349
Psmd6	ENSMUSG00000021737	0.755433	0.939735	0	-0.0366249
Zfp182	ENSMUSG00000054737	0.7382	0.871862	0	0.104914
Rnf24	ENSMUSG00000048911	0.594218	0.985446	0	-0.234188
Anln	ENSMUSG00000036777	0.760791	0.928489	0	0.0881809
Mef2a	ENSMUSG00000030557	0.72578	0.92065	0	-0.293674
Lmnb2	ENSMUSG00000062075	0.789005	0.854662	0	0.0228358
Ccdc9	ENSMUSG00000041375	0.576324	0.992194	0	-0.118986
Sdcbp	ENSMUSG00000028249	0.738729	0.884299	0	-0.114047
Adprh	ENSMUSG00000002844	0.63305	0.903847	0	0.137065
Mrpl51	ENSMUSG00000030335	0.73734	0.889326	0	0.099994
Zfp142	ENSMUSG00000026135	0.640658	0.905732	0	-0.0774645
Cenph	ENSMUSG00000045273	0.793074	0.842722	0	0.0116751
Uso1	ENSMUSG00000029407	0.577052	0.963583	0	-0.0249094
Fdxacb1	ENSMUSG00000037845	0.751001	0.849601	0	0.117688
Zfp689	ENSMUSG00000048921	0.800979	0.884299	0	0.0417825
Mapk8ip3	ENSMUSG00000024163	0.641981	0.983032	0	-0.0195945
Cmtr2	ENSMUSG00000046441	0.624053	0.835941	0	-0.0875941
D2hgdh	ENSMUSG00000073609	0.635431	0.842722	0	-0.00820958
Thap11	ENSMUSG00000036442	0.645222	0.952833	0	0.0500218
Emc4	ENSMUSG00000027131	0.848212	0.854662	0	-0.0614061
Zfp687	ENSMUSG00000019338	0.740151	0.842722	0	-0.145796
Trac	ENSMUSG00000076928	0.956769	0.649004	0	-0.0714185
Ncapg2	ENSMUSG00000042029	0.678133	0.884299	0	0.0439688
Dhcr7	ENSMUSG00000058454	0.605993	0.956339	0	0.261009
Rrp1	ENSMUSG00000061032	0.701022	0.926306	0	-0.0690088
4933434E20Rik	ENSMUSG00000027942	0.664836	0.93646	0	-0.0688922
Ube2k	ENSMUSG00000029203	0.771144	0.854662	0	-0.0265223
Gmip	ENSMUSG00000036246	0.679456	0.946118	0	0.0209198
Upf1	ENSMUSG00000058301	0.670096	0.950385	0	-0.0498778
Bcl7b	ENSMUSG00000029681	0.705587	0.854662	0	-0.193312
Caap1	ENSMUSG00000028578	0.707604	0.880363	0	0.105162
Ovca2	ENSMUSG00000038268	0.719016	0.842722	0	0.222763
Sec13	ENSMUSG00000030298	0.766646	0.854662	0	0.0994494
Rab5a	ENSMUSG00000017831	0.681275	0.854662	0	-0.173418
Mea1	ENSMUSG00000002768	0.762478	0.842722	0	0.131202
Cstf3	ENSMUSG00000027176	0.621771	0.902292	0	0.153037
B630019A10Rik	ENSMUSG00000068463	0.638011	0.990077	0	-0.0205466
Csnk2a1	ENSMUSG00000074698	0.577052	0.944994	0	-0.0416358
Rpap1	ENSMUSG00000034032	0.66262	0.889326	0	0.0701927
Mmp10	ENSMUSG00000047562	0.939691	0.615519	0	-0.437245
Crk	ENSMUSG00000017776	0.701386	0.972977	0	-0.265948
Pih1d1	ENSMUSG00000003423	0.729335	0.884299	0	0.0300181
Dusp28	ENSMUSG00000047067	0.624053	0.889326	0	-0.105017
Mrpl15	ENSMUSG00000033845	0.66262	0.905732	0	0.0757602
Ninj1	ENSMUSG00000037966	0.662025	0.835941	0	0.28659
Pdcd2	ENSMUSG00000014771	0.686468	0.905732	0	-0.0225586
Tmem116	ENSMUSG00000029452	0.6524	0.889326	0	-1.26146
Son	ENSMUSG00000022961	0.968809	0.589532	0	0.0123447
Zfp605	ENSMUSG00000023284	0.81335	0.842722	0	0.0793959
Thap7	ENSMUSG00000022760	0.657527	0.928489	0	-0.000253136
Rbbp5	ENSMUSG00000026439	0.800417	0.854662	0	-0.0587526
Mettl14	ENSMUSG00000028114	0.678133	0.871862	0	-0.149758
Lsg1	ENSMUSG00000022538	0.699864	0.854662	0	0.000968625
Dbt	ENSMUSG00000000340	0.723316	0.849601	0	0.0938959
Oxa1l	ENSMUSG00000000959	0.649291	0.923527	0	-0.0139096
Zbtb41	ENSMUSG00000033964	0.677869	0.849601	0	-0.0939589
Csnk1g2	ENSMUSG00000003345	0.651722	0.927844	0	-0.106185
Asnsd1	ENSMUSG00000026095	0.721662	0.854662	0	0.108146
Kpna1	ENSMUSG00000022905	0.586412	0.959911	0	-0.24622
Cyb5rl	ENSMUSG00000028621	0.624053	0.931499	0	0.054498
1110038B12Rik	ENSMUSG00000092203	0.721199	0.884299	0	0.11885
Nagk	ENSMUSG00000034744	0.686468	0.842722	0	0.11695
Zadh2	ENSMUSG00000049090	0.68154	0.89705	0	-0.0182075
Mib2	ENSMUSG00000029060	0.621771	0.981047	0	-0.0893323
Ilf3	ENSMUSG00000032178	0.592134	0.944994	0	-0.0482372
Tmem234	ENSMUSG00000028797	0.657527	0.903847	0	-0.145894
Trrap	ENSMUSG00000045482	0.873813	0.498793	0	0.121197
Cbll1	ENSMUSG00000020659	0.720173	0.854662	0	-0.0460472
Ppp4r3b	ENSMUSG00000020463	0.643204	0.940859	0	-0.0658439
Irf1	ENSMUSG00000018899	0.77088	0.842722	0	-0.351301
Rps27l	ENSMUSG00000036781	0.686468	0.952072	0	0.13542
Zdhhc9	ENSMUSG00000036985	0.623028	0.969603	0	0.0354084
Rnps1	ENSMUSG00000034681	0.699964	0.922138	0	-0.113218
Cdc37l1	ENSMUSG00000024780	0.726822	0.889326	0	0.0253853
Fbxo27	ENSMUSG00000037463	0.590944	0.889326	0	0.300506
Gm42688	ENSMUSG00000079511	0.708894	0.956339	0	-0.160859
Zfp947	ENSMUSG00000063383	0.63305	0.99699	0	0.0679775
Mex3c	ENSMUSG00000037253	0.654054	0.835941	0	-0.102528
Nucks1	ENSMUSG00000026434	0.706546	0.842722	0	-0.112303
Fpgs	ENSMUSG00000009566	0.667698	0.952916	0	-0.0205224
Morf4l2	ENSMUSG00000031422	0.590944	0.835941	0	-0.0831274
Tatdn3	ENSMUSG00000026632	0.777164	0.854662	0	-0.104904
Cdh24	ENSMUSG00000059674	0.807197	0.849601	0	0.0616721
Mrpl55	ENSMUSG00000036860	0.786293	0.854662	0	-0.0190338
Zmynd19	ENSMUSG00000026974	0.60123	0.963583	0	0.0182966
Akr1a1	ENSMUSG00000028692	0.614527	0.889326	0	0.103254
Smim13	ENSMUSG00000091264	0.577052	0.926306	0	0.00732332
Cep89	ENSMUSG00000023072	0.638243	0.889326	0	0.110923
Med11	ENSMUSG00000018923	0.676612	0.835941	0	-0.230454
Rpl17	ENSMUSG00000062328	0.756094	0.905732	0	-0.302855
Zfand4	ENSMUSG00000042213	0.615949	0.905732	0	0.0454216
Nsf	ENSMUSG00000034187	0.675256	0.905732	0	0.0800477
Daxx	ENSMUSG00000002307	0.770416	0.854662	0	0.068351
Rhoq	ENSMUSG00000024143	0.961025	0.603821	0	-0.371147
Hint1	ENSMUSG00000020267	0.777032	0.877353	0	-0.0930519
Iqcc	ENSMUSG00000040795	0.617636	0.995535	0	0.163218
Pafah1b3	ENSMUSG00000005447	0.766943	0.842722	0	-0.367476
Zfp729b	ENSMUSG00000058093	0.657527	0.996825	0	-0.204344
1700066M21Rik	ENSMUSG00000038323	0.679589	0.854662	0	0.049054
Slc35f6	ENSMUSG00000029175	0.683988	0.954321	0	-0.234668
Elac2	ENSMUSG00000020549	0.613568	0.889326	0	0.0457108
Tmed1	ENSMUSG00000032180	0.691926	0.94291	0	-0.114208
Pdlim7	ENSMUSG00000021493	0.790295	0.842722	0	0.0565545
Pdzd11	ENSMUSG00000015668	0.59951	0.842722	0	-0.0900405
Mvp	ENSMUSG00000030681	0.705388	0.901217	0	-0.0190847
Trappc6a	ENSMUSG00000002043	0.703834	0.842722	0	0.1346
Acaa2	ENSMUSG00000036880	0.567922	0.928489	0	0.187358
Psmd11	ENSMUSG00000017428	0.60596	0.944994	0	0.151817
Dhcr24	ENSMUSG00000034926	0.646281	0.849601	0	0.424259
Kdm6bos	ENSMUSG00000085178	0.678001	0.950385	0	-0.153011
Ireb2	ENSMUSG00000032293	0.638243	0.934211	0	-0.0764549
Stx17	ENSMUSG00000061455	0.564913	0.946118	0	0.0840588
Prelid3b	ENSMUSG00000016257	0.618232	0.867793	0	-0.0658766
Dyrk1b	ENSMUSG00000002409	0.737737	0.867793	0	0.254278
Spaca6	ENSMUSG00000080316	0.444018	0.960358	0	0.752524
Mpv17l	ENSMUSG00000022679	0.691926	0.902292	0	-0.135567
Dr1	ENSMUSG00000029265	0.63305	0.905732	0	0.0144311
Cep350	ENSMUSG00000033671	0.68197	0.835941	0	-0.0434497
Txndc9	ENSMUSG00000058407	0.634968	0.877353	0	-0.0109431
Dhx8	ENSMUSG00000034931	0.742566	0.854662	0	-0.0474784
Dnph1	ENSMUSG00000040658	0.60123	0.985413	0	0.278935
Rheb	ENSMUSG00000028945	0.743426	0.646402	0	-0.167419
Snrnp48	ENSMUSG00000021431	0.657527	0.903847	0	-0.00575097
Dnajb5	ENSMUSG00000036052	0.614527	0.835941	0	-0.425864
Ndufaf3	ENSMUSG00000070283	0.683425	0.905732	0	0.298528
Tmed8	ENSMUSG00000034111	0.579565	0.934211	0	0.12648
Ngly1	ENSMUSG00000021785	0.944564	0.648386	0	-0.148044
2310057M21Rik	ENSMUSG00000040177	0.750637	0.871862	0	-0.13544
Gm6904	ENSMUSG00000090881	0.666292	0.905732	0	0.525922
Vps33a	ENSMUSG00000029434	0.773923	0.849601	0	0.0040639
Paqr4	ENSMUSG00000023909	0.63305	0.854662	0	0.0313273
Ckap4	ENSMUSG00000046841	0.654583	0.842722	0	0.624384
Mrps26	ENSMUSG00000037740	0.60123	0.905732	0	-0.0315548
Mzt2	ENSMUSG00000022671	0.59402	0.983726	0	0.0620045
Nacc1	ENSMUSG00000001910	0.708431	0.884299	0	-0.0477596
Hp1bp3	ENSMUSG00000028759	0.657527	0.854662	0	-0.0439129
Cetn4	ENSMUSG00000045031	0.954178	0.630746	0	-0.323407
Sik1	ENSMUSG00000024042	0.571139	0.930382	0	-0.13028
Mrpl2	ENSMUSG00000002767	0.769689	0.835941	0	0.0288551
Usp15	ENSMUSG00000020124	0.58628	0.842722	0	0.00847872
Rpp21	ENSMUSG00000024446	0.613303	0.905732	0	-0.131087
Rpl5	ENSMUSG00000058558	0.701386	0.902292	0	-0.258721
Eid2	ENSMUSG00000046058	0.576324	0.984884	0	-0.54098
Map3k3	ENSMUSG00000020700	0.620448	0.880363	0	-0.267704
Psmd7	ENSMUSG00000039067	0.578871	0.931499	0	-0.00237536
Gm26508	ENSMUSG00000097614	0.683756	0.905732	0	-0.480069
Foxo4	ENSMUSG00000042903	0.704826	0.854662	0	0.00789267
Gpatch4	ENSMUSG00000028069	0.650911	0.938081	0	0.0370197
Zfp672	ENSMUSG00000049755	0.624053	0.854662	0	-0.0298579
Taldo1	ENSMUSG00000025503	0.564913	0.934211	0	0.00776831
Prpf19	ENSMUSG00000024735	0.595343	0.905732	0	-0.0218213
Milr1	ENSMUSG00000040528	0.897	0.62499	0	-0.227966
Dhps	ENSMUSG00000060038	0.718387	0.835941	0	-0.100973
E2f6	ENSMUSG00000057469	0.650746	0.867793	0	-0.167858
Cct4	ENSMUSG00000007739	0.651242	0.880363	0	-0.0612446
Spata2	ENSMUSG00000047030	0.488886	0.923941	0	-0.259816
Apip	ENSMUSG00000010911	0.575199	0.939735	0	0.33955
Eif4ebp1	ENSMUSG00000031490	0.881961	0.637559	0	-0.574543
Zbtb7a	ENSMUSG00000035011	0.913439	0.63359	0	0.0557868
Mettl3	ENSMUSG00000022160	0.640658	0.854662	0	0.0577059
Fgfr1op	ENSMUSG00000069135	0.746767	0.497073	0	-0.091932
Tsc1	ENSMUSG00000026812	0.627956	0.889326	0	-0.111923
Ncoa5	ENSMUSG00000039804	0.562233	0.944994	0	0.0892537
Polr2g	ENSMUSG00000071662	0.60123	0.905732	0	-0.113403
Ndufa6	ENSMUSG00000022450	0.60123	0.880363	0	-0.100263
Rc3h1	ENSMUSG00000040423	0.569676	0.871862	0	-0.0680177
Galt	ENSMUSG00000036073	0.562233	0.899183	0	-0.00924619
Csnk2b	ENSMUSG00000024387	0.68455	0.871862	0	0.151244
Bdh1	ENSMUSG00000046598	0.634968	0.905732	0	-0.0809403
Gabarapl1	ENSMUSG00000030161	0.84604	0.592884	0	0.267986
Hgs	ENSMUSG00000025793	0.648298	0.871862	0	0.0669002
Tnks	ENSMUSG00000031529	0.569973	0.854662	0	-0.211256
Atf6b	ENSMUSG00000015461	0.585453	0.959051	0	0.0208298
Cd164	ENSMUSG00000019818	0.90033	0.589532	0	0.0337636
Lypla1	ENSMUSG00000025903	0.588893	0.835941	0	0.0152451
Zfp770	ENSMUSG00000040321	0.561936	0.889326	0	-0.363035
Mettl1	ENSMUSG00000006732	0.59875	0.950385	0	-0.277731
Golga3	ENSMUSG00000029502	0.60123	0.835941	0	0.130536
Il2rb	ENSMUSG00000068227	0.912662	0.465137	0	0.0832488
Fam212b	ENSMUSG00000048458	0.582112	0.889326	0	0.335117
Ndufa3	ENSMUSG00000035674	0.612675	0.867793	0	-0.115573
Pold4	ENSMUSG00000024854	0.568518	0.996924	0	0.0148842
Nusap1	ENSMUSG00000027306	0.580591	0.854662	0	0.0306412
Arl2	ENSMUSG00000024944	0.705421	0.854662	0	-0.108135
Rpl10	ENSMUSG00000008682	0.624053	0.889326	0	-0.0467314
Rfc4	ENSMUSG00000022881	0.578606	0.889326	0	-0.0326917
Tnfrsf9	ENSMUSG00000028965	0.765134	0.689214	0	-0.0747143
Ndufs4	ENSMUSG00000021764	0.639037	0.835941	0	0.027839
Trafd1	ENSMUSG00000042726	0.580591	0.899183	0	0.279514
Wsb2	ENSMUSG00000029364	0.587901	0.835941	0	0.0608196
Slfn2	ENSMUSG00000072620	0.934917	0.614582	0	-0.071971
Sgsm2	ENSMUSG00000038351	0.577052	0.905732	0	0.0946723
Rgcc	ENSMUSG00000022018	0.830108	0.660051	0	-0.483192
Rabep2	ENSMUSG00000030727	0.657527	0.884299	0	-0.133409
Timeless	ENSMUSG00000039994	0.6052	0.854662	0	0.0312277
Wdr45b	ENSMUSG00000025173	0.657527	0.871862	0	-0.246146
Clk3	ENSMUSG00000032316	0.627107	0.87044	0	-0.208765
Gm26885	ENSMUSG00000097125	0.908692	0.474978	0	-0.448593
Prmt2	ENSMUSG00000020230	0.608441	0.842722	0	0.052023
Irf3	ENSMUSG00000003184	0.589091	0.91969	0	0.023419
Crlf2	ENSMUSG00000033467	0.436592	0.899034	0	0.0909967
B3galt5	ENSMUSG00000074892	0.861955	0.480369	0	-0.242228
Hmg20a	ENSMUSG00000032329	0.931978	0.487762	0	0.0411981
Rab19	ENSMUSG00000029923	0.780895	0.68373	0	-0.110928
Naa25	ENSMUSG00000042719	0.615056	0.835941	0	0.0564388
Pdp1	ENSMUSG00000049225	0.396173	0.982023	0	-0.0295592
Arid3b	ENSMUSG00000004661	0.492426	0.919922	0	-0.243633
Pdia4	ENSMUSG00000025823	0.720484	0.694235	0	0.119123
Kti12	ENSMUSG00000073775	0.568518	0.905732	0	-0.0617075
Actr2	ENSMUSG00000020152	0.551891	0.876173	0	0.0209086
Nt5dc3	ENSMUSG00000054027	0.86996	0.494956	0	-0.360177
N4bp2l2	ENSMUSG00000029655	0.791144	0.591043	0	-0.0298793
Necap1	ENSMUSG00000030327	0.948864	0.47043	0	-0.175265
Palm3	ENSMUSG00000047986	0.476069	0.969785	0	-0.435177
Brd4	ENSMUSG00000024002	0.673072	0.842722	0	-0.120688
Golim4	ENSMUSG00000034109	0.90187	0.449393	0	0.136978
Mlst8	ENSMUSG00000024142	0.667251	0.849601	0	-0.0688511
Usf2	ENSMUSG00000058239	0.562134	0.842722	0	-0.122482
Phtf1	ENSMUSG00000058388	0.860186	0.624174	0	0.0144457
Dcxr	ENSMUSG00000039450	0.605067	0.867793	0	0.401562
Tctn2	ENSMUSG00000029386	0.598187	0.854662	0	0.474403
Ddx6	ENSMUSG00000032097	0.793824	0.653657	0	-0.31536
Skil	ENSMUSG00000027660	0.8026	0.569775	0	-0.298807
Gm26520	ENSMUSG00000097429	0.904971	0.499917	0	-0.449774
Nit2	ENSMUSG00000022751	0.858609	0.566401	0	0.008869
Klhl18	ENSMUSG00000054792	0.833526	0.481676	0	0.0869793
C2cd2	ENSMUSG00000045975	0.876195	0.46904	0	0.417184
Pithd1	ENSMUSG00000028669	0.852859	0.491251	0	-0.0880943
Dscc1	ENSMUSG00000022422	0.589091	0.854662	0	0.104732
Pex19	ENSMUSG00000003464	0.589091	0.854662	0	-0.115195
Hilpda	ENSMUSG00000043421	0.843747	0.478864	0	-0.0884114
Pspc1	ENSMUSG00000021938	0.574935	0.854662	0	-0.120841
H2afz	ENSMUSG00000037894	0.859574	0.427331	0	0.382394
Zmym6	ENSMUSG00000042408	0.883571	0.421361	0	0.17261
Nipal1	ENSMUSG00000067219	0.905038	0.41797	0	-0.0937996
Rpl11	ENSMUSG00000059291	0.838642	0.634142	0	-0.130485
Retreg3	ENSMUSG00000017802	0.588463	0.854662	0	-0.0699638
Cdca7	ENSMUSG00000055612	0.666578	0.613127	0	0.0848859
Cnot2	ENSMUSG00000020166	0.886399	0.452866	0	-0.115282
Psmc2	ENSMUSG00000028932	0.923213	0.476036	0	0.119639
Cnga1	ENSMUSG00000067220	0.699914	0.697657	0	0.419236
Dok1	ENSMUSG00000068335	0.969537	0.486224	0	0.251397
D230025D16Rik	ENSMUSG00000031889	0.578606	0.899183	0	-0.101649
Il10rb	ENSMUSG00000022969	0.538165	0.945931	0	-0.121271
Fbxo32	ENSMUSG00000022358	0.733713	0.613645	0	-0.343181
Atg2b	ENSMUSG00000041341	0.880065	0.493186	0	-0.241541
Osm	ENSMUSG00000058755	0.463699	0.976119	0	-0.535421
Mapk6	ENSMUSG00000042688	0.814011	0.620922	0	-0.0987571
Dpp8	ENSMUSG00000032393	0.585916	0.871862	0	0.0848223
Cog8	ENSMUSG00000031916	0.595343	0.835941	0	0.126682
Ccny	ENSMUSG00000024286	0.728856	0.452866	0	-0.120972
E130308A19Rik	ENSMUSG00000045071	0.830467	0.452866	0	-0.119845
Cdca8	ENSMUSG00000028873	0.387342	0.903913	0	-0.0556603
Eif2b5	ENSMUSG00000003235	0.877849	0.475193	0	-0.0234765
Rabggta	ENSMUSG00000040472	0.870291	0.452866	0	-0.221011
Lamtor4	ENSMUSG00000050552	0.828151	0.438676	0	0.0423437
Rabep1	ENSMUSG00000020817	0.57037	0.842722	0	0.0769012
Zfp329	ENSMUSG00000057894	0.572487	0.854662	0	0.12425
Naa20	ENSMUSG00000002728	0.85711	0.451923	0	0.244612
Mrpl48	ENSMUSG00000030706	0.867049	0.473936	0	0.040993
Chd9	ENSMUSG00000056608	0.787471	0.53001	0	-0.134447
Nars2	ENSMUSG00000018995	0.736282	0.603821	0	-0.115074
Arrdc2	ENSMUSG00000002910	0.455115	0.926686	0	-0.149612
Gtpbp8	ENSMUSG00000022668	0.908229	0.41797	0	-0.00994221
Creb1	ENSMUSG00000025958	0.877253	0.438676	0	0.0166045
Impact	ENSMUSG00000024423	0.791618	0.438676	0	-0.252644
Nckap5l	ENSMUSG00000023009	0.577052	0.854662	0	-0.493481
Adnp	ENSMUSG00000051149	0.819237	0.495932	0	-0.174576
Ghitm	ENSMUSG00000041028	0.637471	0.649004	0	-0.103922
Ermp1	ENSMUSG00000046324	0.914779	0.492359	0	0.23708
1190007I07Rik	ENSMUSG00000063320	0.577052	0.842722	0	-0.183307
Szrd1	ENSMUSG00000040842	0.845665	0.473936	0	-0.31452
Wbp1l	ENSMUSG00000047731	0.726727	0.594578	0	-0.191474
Sh2b1	ENSMUSG00000030733	0.765036	0.579643	0	-0.00941724
Dnaja1	ENSMUSG00000028410	0.873764	0.487778	0	-0.022678
Stam2	ENSMUSG00000055371	0.335924	0.935617	0	-0.0176551
Cyb5r1	ENSMUSG00000026456	0.570899	0.842722	0	0.0263939
Irs2	ENSMUSG00000038894	0.824314	0.427331	0	-0.216117
Fam162a	ENSMUSG00000003955	0.820494	0.442149	0	0.111253
Adamts10	ENSMUSG00000024299	0.817368	0.474978	0	-0.0873324
Snx14	ENSMUSG00000032422	0.851073	0.465137	0	0.0877708
Eml2	ENSMUSG00000040811	0.786459	0.600668	0	0.0736892
Acp6	ENSMUSG00000028093	0.564913	0.867793	0	-0.0812079
Raf1	ENSMUSG00000000441	0.915754	0.464244	0	-0.353013
Zc3h12a	ENSMUSG00000042677	0.775891	0.485066	0	-0.079182
Phc3	ENSMUSG00000037652	0.737458	0.547075	0	0.178947
Bcl10	ENSMUSG00000028191	0.589973	0.648431	0	-0.253107
Rsbn1	ENSMUSG00000044098	0.867496	0.489184	0	0.0104188
Malt1	ENSMUSG00000032688	0.639674	0.67753	0	-0.401922
Tmem140	ENSMUSG00000057137	0.660018	0.659445	0	-0.33171
Efcab2	ENSMUSG00000026495	0.655961	0.631694	0	-0.144211
Tprgl	ENSMUSG00000029030	0.693431	0.481791	0	-0.0150213
Man1a	ENSMUSG00000003746	0.736426	0.468776	0	0.118033
Eif4ebp2	ENSMUSG00000020091	0.673955	0.581241	0	-0.266553
Aco2	ENSMUSG00000022477	0.914812	0.468743	0	-0.0077495
Hormad2	ENSMUSG00000020419	0.743558	0.367301	0	-0.405826
Trap1	ENSMUSG00000005981	0.802567	0.475193	0	0.0525379
Snx25	ENSMUSG00000038291	0.954024	0.449592	0	0.0441021
Trim30a	ENSMUSG00000030921	0.929514	0.41797	0	0.325239
Bet1l	ENSMUSG00000025484	0.620095	0.657008	0	-0.230664
Fgfr1op2	ENSMUSG00000040242	0.761717	0.561814	0	0.0692559
Mfsd2a	ENSMUSG00000028655	0.878643	0.427331	0	0.159299
Epb41l2	ENSMUSG00000019978	0.647571	0.495865	0	0.188104
N4bp2l1	ENSMUSG00000041132	0.606622	0.654031	0	0.158318
Phip	ENSMUSG00000032253	0.711218	0.666995	0	-0.152197
Peak1	ENSMUSG00000074305	0.736965	0.594494	0	-0.239096
Cutc	ENSMUSG00000025193	0.894916	0.321194	0	0.167279
Tmem154	ENSMUSG00000056498	0.706936	0.581715	0	0.0131066
Ckap5	ENSMUSG00000040549	0.695068	0.592884	0	0.0817849
Lin54	ENSMUSG00000035310	0.833129	0.38022	0	0.235104
Fus	ENSMUSG00000030795	0.886449	0.444663	0	-0.213125
Crebrf	ENSMUSG00000048249	0.897182	0.435931	0	-0.259192
Shoc2	ENSMUSG00000024976	0.841316	0.435931	0	-0.0187642
Inpp5d	ENSMUSG00000026288	0.725366	0.659795	0	-0.0869017
Ugp2	ENSMUSG00000001891	0.771558	0.499818	0	0.0895691
Tcf12	ENSMUSG00000032228	0.682784	0.681494	0	-0.412952
Nsun3	ENSMUSG00000050312	0.343234	0.933037	0	0.230527
Tor1aip1	ENSMUSG00000026466	0.718255	0.599455	0	0.123357
Cdkl3	ENSMUSG00000020389	0.814706	0.572582	0	-0.0149699
Ube2z	ENSMUSG00000014349	0.914183	0.41797	0	-0.0394134
Clic1	ENSMUSG00000007041	0.450815	0.883339	0	-0.0287492
1600014C10Rik	ENSMUSG00000054676	0.448417	0.916019	0	0.307341
Tpst1	ENSMUSG00000034118	0.859227	0.424801	0	0.0363059
Fam46a	ENSMUSG00000032265	0.806437	0.467105	0	0.140809
Cisd3	ENSMUSG00000078695	0.786244	0.496428	0	0.278177
Bicdl1	ENSMUSG00000041609	0.751067	0.569986	0	-0.558135
Gm15232	ENSMUSG00000084806	0.884927	0.317611	0	0.212205
Slc9a3r1	ENSMUSG00000020733	0.786277	0.485066	0	0.0176719
Cdc42ep3	ENSMUSG00000036533	0.664881	0.589532	0	-0.212443
Dleu2	ENSMUSG00000097589	0.936824	0.41797	0	-0.0230281
Traf6	ENSMUSG00000027164	0.793801	0.480799	0	-0.317445
Myd88	ENSMUSG00000032508	0.79223	0.427331	0	-0.2225
Rnf216	ENSMUSG00000045078	0.378179	0.878477	0	-0.191916
Zfp513	ENSMUSG00000043059	0.84072	0.452866	0	-0.166592
Midn	ENSMUSG00000035621	0.82013	0.47043	0	-0.246472
Mepce	ENSMUSG00000029726	0.847666	0.440181	0	-0.374219
Mtor	ENSMUSG00000028991	0.3755	0.939569	0	0.0370859
Hectd4	ENSMUSG00000042744	0.59459	0.696234	0	0.0181951
Map2k3	ENSMUSG00000018932	0.774584	0.493368	0	0.1452
Prmt5	ENSMUSG00000023110	0.76476	0.492029	0	0.00862472
Psat1	ENSMUSG00000024640	0.440744	0.922733	0	0.0218575
Asxl1	ENSMUSG00000042548	0.968952	0.330412	0	-0.220172
Chst12	ENSMUSG00000036599	0.960088	0.312153	0	0.348705
Zfp945	ENSMUSG00000059142	0.459928	0.87856	0	0.366604
Trappc10	ENSMUSG00000000374	0.87087	0.484603	0	-0.237107
Ap3m1	ENSMUSG00000021824	0.450005	0.91711	0	0.0277417
Nvl	ENSMUSG00000026516	0.859342	0.427331	0	0.153917
Ptpra	ENSMUSG00000027303	0.548859	0.632366	0	-0.0551386
Nxn	ENSMUSG00000020844	0.770714	0.49656	0	-0.513145
Necap2	ENSMUSG00000028923	0.741441	0.459845	0	-0.046038
Gm26541	ENSMUSG00000097889	0.851321	0.472497	0	0.0865185
Zfp84	ENSMUSG00000046185	0.766199	0.467105	0	-0.119831
Eloc	ENSMUSG00000079658	0.613149	0.62649	0	-0.0881611
Zfp36	ENSMUSG00000044786	0.906109	0.398333	0	-0.547437
Stx16	ENSMUSG00000027522	0.776238	0.442149	0	0.0632855
Gpr160	ENSMUSG00000037661	0.715691	0.473936	0	0.193988
Zmat3	ENSMUSG00000027663	0.64219	0.639875	0	0.301164
Dtwd2	ENSMUSG00000024505	0.882634	0.314303	0	-0.302403
Rcor3	ENSMUSG00000037395	0.696838	0.435931	0	0.00769698
Arl8b	ENSMUSG00000030105	0.727461	0.628089	0	-0.0138581
Arpc1b	ENSMUSG00000029622	0.843102	0.474498	0	0.0489385
Ranbp2	ENSMUSG00000003226	0.841266	0.421361	0	-0.380938
Sdhb	ENSMUSG00000009863	0.840853	0.424801	0	0.0608757
Elac1	ENSMUSG00000036941	0.76132	0.452866	0	-0.139521
Ppp1r3b	ENSMUSG00000046794	0.804336	0.449592	0	-0.0777404
Adat3	ENSMUSG00000035370	0.886945	0.427331	0	-0.168001
Trip11	ENSMUSG00000021188	0.725317	0.424801	0	-0.0196089
Cep164	ENSMUSG00000043987	0.872507	0.427331	0	0.126189
Erh	ENSMUSG00000021131	0.648982	0.603821	0	-0.15094
Odf2l	ENSMUSG00000028256	0.573568	0.561814	0	0.17984
Strip1	ENSMUSG00000014601	0.66186	0.624307	0	0.0122007
Secisbp2	ENSMUSG00000035139	0.810141	0.452866	0	-0.0461651
Setd4	ENSMUSG00000022948	0.589488	0.705975	0	-0.207846
Fam122a	ENSMUSG00000074922	0.691265	0.444663	0	-0.201006
Rpl28	ENSMUSG00000030432	0.751662	0.473936	0	-0.257393
Lipe	ENSMUSG00000003123	0.815648	0.421361	0	0.404433
5031425E22Rik	ENSMUSG00000073147	0.700403	0.517023	0	-0.204898
Tnfrsf25	ENSMUSG00000024793	0.762213	0.481791	0	-0.0190401
Ptbp1	ENSMUSG00000006498	0.809314	0.444663	0	-0.142925
Gm14321	ENSMUSG00000084797	0.768167	0.465749	0	-0.0513867
Mrps22	ENSMUSG00000032459	0.825009	0.433897	0	0.1555
Mmaa	ENSMUSG00000037022	0.902888	0.41797	0	0.0997724
Hemk1	ENSMUSG00000032579	0.709867	0.518725	0	-0.0940205
Mfhas1	ENSMUSG00000070056	0.852923	0.383148	0	-0.333308
Cdc42	ENSMUSG00000006699	0.40388	0.912017	0	-0.0275472
Sde2	ENSMUSG00000038806	0.58779	0.655509	0	-0.199627
Acap3	ENSMUSG00000029033	0.810919	0.4978	0	-0.316088
Psap	ENSMUSG00000004207	0.875699	0.444663	0	0.0623769
Klc1	ENSMUSG00000021288	0.818179	0.499305	0	0.194761
Zcchc2	ENSMUSG00000038866	0.698244	0.451146	0	-0.0842336
Fas	ENSMUSG00000024778	0.810681	0.294766	0	-0.567213
Slc39a10	ENSMUSG00000025986	0.608959	0.581241	0	0.0247379
Evi5	ENSMUSG00000011831	0.795765	0.46159	0	-0.0984204
Gbe1	ENSMUSG00000022707	0.672039	0.478161	0	-0.199699
Wipi1	ENSMUSG00000041895	0.588805	0.662323	0	-0.0689145
Cpeb2	ENSMUSG00000039782	0.750339	0.442149	0	-0.146686
Hnrnpul1	ENSMUSG00000040725	0.712268	0.444663	0	-0.0529128
Fbxw8	ENSMUSG00000032867	0.752671	0.421361	0	0.262038
Arrdc3	ENSMUSG00000074794	0.818355	0.331426	0	-0.444699
Arhgef40	ENSMUSG00000004562	0.797787	0.442149	0	0.37866
Nt5c3	ENSMUSG00000029780	0.666019	0.452081	0	0.0138445
Fndc3a	ENSMUSG00000033487	0.786773	0.463153	0	0.109937
Diexf	ENSMUSG00000016181	0.833311	0.461764	0	-0.209135
Nrros	ENSMUSG00000052384	0.735339	0.444663	0	-0.20507
D630008O14Rik	ENSMUSG00000054006	0.978423	0.296442	0	3.22748
Rest	ENSMUSG00000029249	0.758575	0.452866	0	-0.192261
Lime1	ENSMUSG00000090077	0.585321	0.638486	0	0.445931
Akt3	ENSMUSG00000019699	0.573501	0.569775	0	-0.0457087
Fam3c	ENSMUSG00000029672	0.643579	0.457855	0	0.545505
Sirt2	ENSMUSG00000015149	0.808041	0.481791	0	-0.136077
Lonp2	ENSMUSG00000047866	0.896372	0.21068	0	0.3683
Cetn3	ENSMUSG00000021537	0.538551	0.569775	0	-0.0439803
4933427D14Rik	ENSMUSG00000020807	0.645299	0.637526	0	-0.142746
Gm9978	ENSMUSG00000055704	0.570436	0.648585	0	-0.0302359
Fbxl2	ENSMUSG00000032507	0.48253	0.607614	0	-0.174124
Cit	ENSMUSG00000029516	0.505981	0.62907	0	0.00651904
Tgm2	ENSMUSG00000037820	0.751282	0.435931	0	0.173915
Bbs4	ENSMUSG00000025235	0.61445	0.636567	0	-0.0819768
Pkd1	ENSMUSG00000032855	0.730807	0.421361	0	0.0300262
Twsg1	ENSMUSG00000024098	0.639384	0.427331	0	0.320899
Xkr5	ENSMUSG00000039814	0.743724	0.438676	0	-0.526796
Usp45	ENSMUSG00000040455	0.787925	0.296442	0	0.0670984
Mtrf1l	ENSMUSG00000019774	0.676612	0.465137	0	-0.0415231
Itm2c	ENSMUSG00000026223	0.52199	0.603667	0	0.332666
Simc1	ENSMUSG00000043183	0.702003	0.569775	0	-0.00182272
Ddx54	ENSMUSG00000029599	0.502475	0.627339	0	0.0147717
Mapk14	ENSMUSG00000053436	0.794044	0.471036	0	-0.11941
Qsox1	ENSMUSG00000033684	0.777442	0.367089	0	-0.0381135
Zfp617	ENSMUSG00000066880	0.313978	0.897529	0	-0.0102027
Casp3	ENSMUSG00000031628	0.853284	0.324502	0	0.346314
Rnf157	ENSMUSG00000052949	0.761754	0.519249	0	-0.0323108
Pus10	ENSMUSG00000020280	0.709853	0.465749	0	0.200573
Eif4e2	ENSMUSG00000026254	0.761486	0.49876	0	-0.0725101
Scfd2	ENSMUSG00000062110	0.485444	0.667596	0	-0.111105
Srxn1	ENSMUSG00000032802	0.523181	0.618937	0	-0.284301
Zzz3	ENSMUSG00000039068	0.7768	0.469415	0	-0.202398
Cox7a1	ENSMUSG00000074218	0.813052	0.461069	0	-0.190715
Spata6	ENSMUSG00000034401	0.611228	0.452866	0	0.0904623
Timm10	ENSMUSG00000027076	0.770846	0.486753	0	0.0515541
Clasp1	ENSMUSG00000064302	0.66692	0.491961	0	0.199785
Ube2v1	ENSMUSG00000078923	0.585618	0.627085	0	0.127186
Oas3	ENSMUSG00000032661	0.747461	0.461764	0	0.619957
Ankrd46	ENSMUSG00000048307	0.715476	0.427331	0	0.158917
Epc1	ENSMUSG00000024240	0.465237	0.676041	0	-0.28396
Ptpn13	ENSMUSG00000034573	0.571091	0.629117	0	0.23057
Tpd52l2	ENSMUSG00000000827	0.741425	0.463153	0	-0.053758
Pstpip1	ENSMUSG00000032322	0.714058	0.506077	0	0.000225624
Mcur1	ENSMUSG00000021371	0.764198	0.494807	0	-0.326909
Ano6	ENSMUSG00000064210	0.240014	0.876228	0	-0.044411
Lrig2	ENSMUSG00000032913	0.79615	0.427331	0	-0.228155
Irf2bpl	ENSMUSG00000034168	0.839265	0.41797	0	-0.23615
Bach1	ENSMUSG00000025612	0.709379	0.46135	0	-0.387314
Fkbp1a	ENSMUSG00000032966	0.749148	0.442149	0	-0.0802231
Tspan3	ENSMUSG00000032324	0.741011	0.427331	0	-0.0862678
Tex264	ENSMUSG00000040813	0.36356	0.852132	0	0.0944716
Zfp51	ENSMUSG00000023892	0.565761	0.592531	0	-0.0665829
Traf3ip3	ENSMUSG00000037318	0.662579	0.488837	0	0.0563008
Lrpprc	ENSMUSG00000024120	0.705339	0.493302	0	-0.0262999
Atxn7l3	ENSMUSG00000059995	0.810092	0.459845	0	-0.0397606
BC005537	ENSMUSG00000019132	0.879161	0.292451	0	-0.102711
Tes	ENSMUSG00000029552	0.606401	0.589532	0	-0.198075
Prmt3	ENSMUSG00000030505	0.68374	0.485876	0	-0.141354
Ogg1	ENSMUSG00000030271	0.753101	0.46823	0	0.226171
Cnot6l	ENSMUSG00000034724	0.716717	0.452866	0	-0.410701
Ip6k1	ENSMUSG00000032594	0.556632	0.644186	0	-0.142663
Ethe1	ENSMUSG00000064254	0.732081	0.438676	0	-0.323407
Kat6a	ENSMUSG00000031540	0.576302	0.584902	0	-0.0279175
Nfkbia	ENSMUSG00000021025	0.861178	0.306563	0	-0.295998
Lrrc8d	ENSMUSG00000046079	0.907737	0.191268	0	-0.000735554
Ier5l	ENSMUSG00000089762	0.651877	0.365574	0	0.495553
B9d2	ENSMUSG00000063439	0.672907	0.465749	0	-0.0674806
Map4	ENSMUSG00000032479	0.426752	0.724473	0	0.193908
Sart1	ENSMUSG00000039148	0.335924	0.897777	0	-0.027264
Zc3h7b	ENSMUSG00000022390	0.666275	0.47043	0	0.295794
Parp8	ENSMUSG00000021725	0.697466	0.459845	0	-0.0986246
Casp8	ENSMUSG00000026029	0.632455	0.60133	0	0.0834589
Rad52	ENSMUSG00000030166	0.790742	0.435931	0	0.0257273
Lasp1	ENSMUSG00000038366	0.675567	0.539491	0	0.0850026
Tnks2	ENSMUSG00000024811	0.70777	0.467105	0	-0.207488
Arpc5l	ENSMUSG00000026755	0.689919	0.329265	0	0.0155951
Rcor2	ENSMUSG00000024968	0.709407	0.491284	0	-0.0569583
Nabp1	ENSMUSG00000026107	0.939338	0.170932	0	-0.384718
Cmtm7	ENSMUSG00000032436	0.793881	0.358621	0	-0.436803
Pla2g6	ENSMUSG00000042632	0.672444	0.484562	0	0.0490375
Otud5	ENSMUSG00000031154	0.655928	0.557294	0	-0.12525
Stard10	ENSMUSG00000030688	0.630503	0.475193	0	-0.0991529
Pmp22	ENSMUSG00000018217	0.529686	0.585111	0	0.293263
Brd2	ENSMUSG00000024335	0.908158	0.284887	0	-0.135328
Cluap1	ENSMUSG00000014232	0.474812	0.659258	0	0.244673
Plk1	ENSMUSG00000030867	0.730317	0.332043	0	0.102996
Mettl17	ENSMUSG00000004561	0.699897	0.427331	0	0.0908178
Akap1	ENSMUSG00000018428	0.556368	0.618992	0	-0.0306591
Fam43a	ENSMUSG00000046546	0.559058	0.594362	0	-0.0921522
Btbd19	ENSMUSG00000073771	0.694597	0.461325	0	0.278159
Inpp5b	ENSMUSG00000028894	0.549653	0.574152	0	0.172147
Capn2	ENSMUSG00000026509	0.791183	0.301911	0	-0.323596
Ppp1r8	ENSMUSG00000028882	0.892645	0.321194	0	-0.0496964
Cfl1	ENSMUSG00000056201	0.736298	0.494691	0	-0.0622883
AW549877	ENSMUSG00000041935	0.428505	0.459845	0	-0.0769589
Ankle1	ENSMUSG00000046295	0.713376	0.427331	0	-0.103048
Ypel2	ENSMUSG00000018427	0.671341	0.309496	0	0.411749
Rhog	ENSMUSG00000073982	0.922039	0.284887	0	-0.26673
Mcub	ENSMUSG00000027994	0.349221	0.886812	0	0.0171865
Abi3	ENSMUSG00000018381	0.590756	0.624693	0	-0.320797
Supt16	ENSMUSG00000035726	0.75492	0.41797	0	0.0595385
Fam213a	ENSMUSG00000021792	0.641766	0.435931	0	0.219896
Afg3l1	ENSMUSG00000031967	0.718834	0.452866	0	-0.0231848
Ptpn2	ENSMUSG00000024539	0.771607	0.320974	0	-0.251404
Senp1	ENSMUSG00000033075	0.914222	0.284887	0	-0.0284253
Cdk2ap1	ENSMUSG00000029394	0.711491	0.490309	0	0.0194136
Slc25a19	ENSMUSG00000020744	0.544537	0.622818	0	0.328345
Smg1	ENSMUSG00000030655	0.861302	0.235728	0	-0.0521342
Kcmf1	ENSMUSG00000055239	0.824221	0.301911	0	-0.0796913
Ube2g1	ENSMUSG00000020794	0.718999	0.452866	0	-0.0513206
Ivns1abp	ENSMUSG00000023150	0.819083	0.323377	0	-0.379263
Eif3h	ENSMUSG00000022312	0.575977	0.483065	0	-0.0437332
Zfp395	ENSMUSG00000034522	0.721232	0.482337	0	-0.392873
Sfmbt1	ENSMUSG00000006527	0.928334	0.284887	0	0.110784
Gadd45gip1	ENSMUSG00000033751	0.676115	0.473059	0	0.0999905
Lars2	ENSMUSG00000035202	0.749744	0.435931	0	0.611097
Zgpat	ENSMUSG00000027582	0.680812	0.444663	0	0.0458861
Susd6	ENSMUSG00000021133	0.733239	0.417675	0	-0.00503768
Arhgdia	ENSMUSG00000025132	0.731287	0.461764	0	0.0395403
Bri3bp	ENSMUSG00000037905	0.667565	0.427331	0	0.309589
Hnrnpd	ENSMUSG00000000568	0.743443	0.433897	0	-0.13597
Zfp367	ENSMUSG00000044934	0.790075	0.301282	0	-0.151002
Gm20496	ENSMUSG00000092550	0.752406	0.442149	0	0.325024
Gnpnat1	ENSMUSG00000037722	0.397513	0.461764	0	0.116692
Fancc	ENSMUSG00000021461	0.582721	0.540456	0	-0.0773767
Atp6v0a1	ENSMUSG00000019302	0.561428	0.649643	0	0.174984
4930522L14Rik	ENSMUSG00000072762	0.691926	0.41797	0	-0.137232
Pkn3	ENSMUSG00000026785	0.879183	0.307842	0	0.121563
Cd5	ENSMUSG00000024669	0.781508	0.332892	0	0.389742
Adam10	ENSMUSG00000054693	0.787748	0.328206	0	0.115145
Prpf4b	ENSMUSG00000021413	0.670096	0.427331	0	-0.109387
Cycs	ENSMUSG00000063694	0.66568	0.486025	0	0.00246018
Pabpc1	ENSMUSG00000022283	0.650167	0.465137	0	-0.10599
Nup214	ENSMUSG00000001855	0.516356	0.60413	0	0.0618025
Caprin1	ENSMUSG00000027184	0.807969	0.300764	0	0.0655149
Arl4c	ENSMUSG00000049866	0.743972	0.444663	0	-0.46296
Hnrnpf	ENSMUSG00000042079	0.704681	0.433897	0	-0.0407574
5730508B09Rik	ENSMUSG00000050549	0.734479	0.421361	0	-0.142348
Ranbp9	ENSMUSG00000038546	0.76486	0.41797	0	0.0103553
Btla	ENSMUSG00000052013	0.922601	0.280907	0	-0.064909
Psmb10	ENSMUSG00000031897	0.473941	0.62724	0	0.126002
Arid5b	ENSMUSG00000019947	0.693876	0.487574	0	-0.330691
Coq8a	ENSMUSG00000026489	0.491499	0.476036	0	-0.0491075
Phax	ENSMUSG00000008301	0.879139	0.289264	0	-0.026247
Smg5	ENSMUSG00000001415	0.726871	0.433897	0	-0.0621002
Wdr37	ENSMUSG00000021147	0.571649	0.617118	0	-0.222765
Map6	ENSMUSG00000055407	0.723922	0.300764	0	0.0999553
Ttll5	ENSMUSG00000012609	0.687249	0.386816	0	0.0512046
2210016F16Rik	ENSMUSG00000021550	0.695035	0.46823	0	0.230674
Snd1	ENSMUSG00000001424	0.515855	0.573149	0	0.0539627
Traf1	ENSMUSG00000026875	0.748028	0.418795	0	-0.0783624
Mtmr7	ENSMUSG00000039431	0.520352	0.373863	0	0.540345
Gm4221	ENSMUSG00000096948	0.48022	0.452866	0	0.00523253
Rnf115	ENSMUSG00000028098	0.916502	0.199021	0	0.0386957
Vcpkmt	ENSMUSG00000049882	0.759347	0.315373	0	0.00480578
Gm17173	ENSMUSG00000090709	0.486455	0.499157	0	-0.00179026
Mad2l1	ENSMUSG00000029910	0.414382	0.49608	0	-0.0248877
Tomm5	ENSMUSG00000078713	0.465452	0.499702	0	0.0516421
Alas1	ENSMUSG00000032786	0.733239	0.421361	0	0.38454
Pgpep1l	ENSMUSG00000030553	0.654368	0.476417	0	-0.472336
Ctsb	ENSMUSG00000021939	0.840092	0.249413	0	-0.036348
Gnai3	ENSMUSG00000000001	0.662794	0.481229	0	-0.209578
Sec23b	ENSMUSG00000027429	0.566765	0.47043	0	0.0913874
Gm16008	ENSMUSG00000087381	0.829745	0.294766	0	-0.0908094
Zcchc9	ENSMUSG00000021621	0.500469	0.575651	0	0.263772
Prr7	ENSMUSG00000034686	0.848245	0.320246	0	-0.381316
Dnah12	ENSMUSG00000021879	0.485083	0.499967	0	0.132361
Mdfic	ENSMUSG00000041390	0.702587	0.360795	0	-0.0525191
Men1	ENSMUSG00000024947	0.6802	0.452866	0	0.116286
Dnajc12	ENSMUSG00000036764	0.471224	0.498942	0	0.351137
H2afy	ENSMUSG00000015937	0.591762	0.494212	0	-0.0827526
Xpo1	ENSMUSG00000020290	0.846558	0.226433	0	-0.092633
Slfn1	ENSMUSG00000078763	0.830009	0.330654	0	0.152823
Hipk1	ENSMUSG00000008730	0.726673	0.424801	0	-0.23266
Egr1	ENSMUSG00000038418	0.769612	0.280907	0	0.368075
Cdkn2aipnl	ENSMUSG00000020392	0.689396	0.461764	0	0.0117524
Zfr	ENSMUSG00000022201	0.650051	0.490209	0	-0.0411212
Armc9	ENSMUSG00000062590	0.524568	0.491524	0	0.0994104
Kif21b	ENSMUSG00000041642	0.570585	0.47672	0	-0.223414
Ammecr1l	ENSMUSG00000041915	0.555596	0.581241	0	0.0490884
Dynll2	ENSMUSG00000020483	0.784165	0.330533	0	0.0616388
Ttc21b	ENSMUSG00000034848	0.422237	0.481014	0	0.00996936
Lsm11	ENSMUSG00000044847	0.635779	0.444663	0	-0.147729
Rgs1	ENSMUSG00000026358	0.890788	0.181146	0	-0.569832
Pvt1	ENSMUSG00000097039	0.750265	0.297533	0	-0.0369278
Polr3g	ENSMUSG00000035834	0.412232	0.438676	0	-0.108977
Rcan1	ENSMUSG00000022951	0.589654	0.32964	0	0.221765
Aldh9a1	ENSMUSG00000026687	0.497519	0.481791	0	-0.251149
Spef2	ENSMUSG00000072663	0.923263	0.224796	0	0.238686
Slc25a5	ENSMUSG00000016319	0.621308	0.452866	0	0.0252002
Erdr1	ENSMUSG00000096768	0.399224	0.233553	0	0.966639
Eaf1	ENSMUSG00000021890	0.805014	0.310092	0	0.188649
Il23r	ENSMUSG00000049093	0.843802	0.284887	0	-0.565131
Gapdh	ENSMUSG00000057666	0.758266	0.294766	0	-0.139978
Scaf8	ENSMUSG00000046201	0.681606	0.427331	0	-0.0993725
Exosc8	ENSMUSG00000027752	0.778652	0.301911	0	-0.138705
Hnrnpl	ENSMUSG00000015165	0.659949	0.435418	0	-0.0972525
Tpst2	ENSMUSG00000029344	0.71261	0.301596	0	-0.145841
Serpinb9	ENSMUSG00000045827	0.566624	0.440181	0	-0.0318975
Iglon5	ENSMUSG00000013367	0.467072	0.452866	0	-0.103338
B230217C12Rik	ENSMUSG00000050538	0.66907	0.427331	0	0.484799
Scyl2	ENSMUSG00000069539	0.438577	0.487778	0	-0.0705262
Mrpl58	ENSMUSG00000018858	0.496521	0.629588	0	-0.121217
Gmfg	ENSMUSG00000060791	0.729082	0.325186	0	-0.0931275
Tfdp1	ENSMUSG00000038482	0.457183	0.49522	0	0.03018
Mycl	ENSMUSG00000028654	0.634629	0.492591	0	-0.101007
Satb1	ENSMUSG00000023927	0.798052	0.315957	0	-0.559566
Timp2	ENSMUSG00000017466	0.742004	0.240507	0	-0.364745
Iqgap2	ENSMUSG00000021676	0.479818	0.603336	0	-0.452993
Top1	ENSMUSG00000070544	0.522994	0.330886	0	0.150634
Slc35b4	ENSMUSG00000018999	0.402441	0.452866	0	0.0280802
Abcb1b	ENSMUSG00000028970	0.563664	0.455206	0	-0.300685
Cipc	ENSMUSG00000034157	0.774319	0.280907	0	-0.494898
Ablim3	ENSMUSG00000032735	0.518076	0.473779	0	0.254027
Hmga1	ENSMUSG00000046711	0.826735	0.290621	0	-0.238586
Tmcc3	ENSMUSG00000020023	0.541895	0.460866	0	0.49491
Gpd2	ENSMUSG00000026827	0.607813	0.309496	0	-0.377867
Hic1	ENSMUSG00000043099	0.729854	0.333036	0	0.0199687
Sesn1	ENSMUSG00000038332	0.405964	0.453908	0	-0.0891718
Ptger2	ENSMUSG00000037759	0.640724	0.427331	0	0.208741
Nemp1	ENSMUSG00000040195	0.673624	0.326586	0	-0.196923
Tmem8	ENSMUSG00000024180	0.612476	0.449592	0	-0.0131448
Qser1	ENSMUSG00000074994	0.790138	0.216948	0	-0.548408
Chd2	ENSMUSG00000078671	0.658471	0.302065	0	-0.256413
Rgs10	ENSMUSG00000030844	0.658774	0.382641	0	0.272664
Zfp251	ENSMUSG00000022526	0.615056	0.463153	0	0.125258
Zfp524	ENSMUSG00000051184	0.519719	0.586908	0	0.054594
Por	ENSMUSG00000005514	0.703562	0.385433	0	-0.512349
Fbxo34	ENSMUSG00000037536	0.543057	0.483991	0	-0.425655
Fbxo48	ENSMUSG00000044966	0.467188	0.421361	0	0.13603
Ebag9	ENSMUSG00000022339	0.396537	0.464244	0	0.0492423
Smad3	ENSMUSG00000032402	0.698092	0.352859	0	-0.0822811
Crem	ENSMUSG00000063889	0.478781	0.440297	0	-0.344998
Ibtk	ENSMUSG00000035941	0.448814	0.421361	0	-0.10691
Wnk1	ENSMUSG00000045962	0.558396	0.465137	0	0.107171
Tmc3	ENSMUSG00000038540	0.499074	0.498842	0	-0.595545
Agfg1	ENSMUSG00000026159	0.672411	0.357126	0	0.147317
Inpp5k	ENSMUSG00000006127	0.632322	0.467105	0	0.0852655
Otud7b	ENSMUSG00000038495	0.617612	0.421386	0	0.140729
Sytl1	ENSMUSG00000028860	0.470231	0.497635	0	0.447788
Mical2	ENSMUSG00000038244	0.3162	0.575089	0	0.138374
Gad2	ENSMUSG00000026787	0.487497	0.488837	0	-0.0525229
Ncoa3	ENSMUSG00000027678	0.504168	0.5579	0	-0.193495
Rab20	ENSMUSG00000031504	0.446168	0.461069	0	-0.476393
Pgrmc2	ENSMUSG00000049940	0.654318	0.309496	0	0.124876
Snx32	ENSMUSG00000056185	0.469917	0.449592	0	0.157429
Adgrv1	ENSMUSG00000069170	0.451932	0.461251	0	0.0979469
Acvrl1	ENSMUSG00000000530	0.393362	0.452866	0	0.570297
Prelid2	ENSMUSG00000056671	0.203277	0.594604	0	0.321197
Exoc2	ENSMUSG00000021357	0.730389	0.259983	0	-0.0306959
Myo3b	ENSMUSG00000042064	0.584722	0.485111	0	-0.213822
Zfp809	ENSMUSG00000057982	0.431945	0.449592	0	-0.169559
Ncbp3	ENSMUSG00000020783	0.281756	0.611815	0	-0.0355081
Map4k1	ENSMUSG00000037337	0.579673	0.481651	0	-0.0285784
Dbr1	ENSMUSG00000032469	0.461929	0.481791	0	-0.09307
E2f3	ENSMUSG00000016477	0.608582	0.442422	0	0.0249033
Ankrd24	ENSMUSG00000054708	0.575927	0.487497	0	-0.39724
Ciapin1	ENSMUSG00000031781	0.673602	0.237249	0	0.00745268
Klhl6	ENSMUSG00000043008	0.524636	0.290621	0	-0.279657
Rnpep	ENSMUSG00000041926	0.7639	0.322859	0	0.0853233
Kif20b	ENSMUSG00000024795	0.476003	0.433897	0	0.0577237
Os9	ENSMUSG00000040462	0.569254	0.461689	0	-0.0519194
Hsp90aa1	ENSMUSG00000021270	0.745863	0.31362	0	0.0504176
Tk2	ENSMUSG00000035824	0.606589	0.324502	0	-0.171141
Tox2	ENSMUSG00000074607	0.724738	0.226433	0	0.417723
Capza1	ENSMUSG00000070372	0.328763	0.481014	0	0.0652237
Rragb	ENSMUSG00000041658	0.368868	0.497718	0	0.292251
Usp49	ENSMUSG00000090115	0.432127	0.471455	0	-0.155026
Smdt1	ENSMUSG00000022452	0.475606	0.471455	0	-0.131412
Psmb8	ENSMUSG00000024338	0.770703	0.2832	0	0.234528
Tada2b	ENSMUSG00000029196	0.476615	0.473936	0	-0.187635
Rasa2	ENSMUSG00000032413	0.589995	0.319684	0	-0.206984
Pepd	ENSMUSG00000063931	0.329629	0.60929	0	-0.304174
Card19	ENSMUSG00000037960	0.661363	0.329199	0	0.0606811
Irak2	ENSMUSG00000060477	0.789327	0.135708	0	0.20798
Disp1	ENSMUSG00000030768	0.819287	0.213666	0	-0.415198
Fem1c	ENSMUSG00000033319	0.328763	0.478831	0	-0.0344378
Slc16a3	ENSMUSG00000025161	0.359508	0.452866	0	-0.392768
Abcc3	ENSMUSG00000020865	0.653749	0.376039	0	0.00517204
Fam193a	ENSMUSG00000037210	0.722561	0.347025	0	-0.0509266
Cap2	ENSMUSG00000021373	0.464145	0.424801	0	0.992773
Sap130	ENSMUSG00000024260	0.37034	0.487613	0	-0.00165816
Mbd4	ENSMUSG00000030322	0.397265	0.49785	0	0.11659
Faah	ENSMUSG00000034171	0.464667	0.524701	0	-0.129228
Aff3	ENSMUSG00000037138	0.659338	0.302616	0	-0.607522
Mtmr4	ENSMUSG00000018401	0.446152	0.490987	0	-0.0883858
Malat1	ENSMUSG00000092341	0.703331	0.360798	0	0.132427
Tpm4	ENSMUSG00000031799	0.774328	0.217965	0	-0.0153004
Foxn3	ENSMUSG00000033713	0.700079	0.309436	0	-0.229224
Ptp4a1	ENSMUSG00000026064	0.483875	0.498545	0	-0.25451
Nf1	ENSMUSG00000020716	0.583049	0.467392	0	-0.0863504
Mapre2	ENSMUSG00000024277	0.55537	0.446526	0	-0.00371966
Cracr2a	ENSMUSG00000061414	0.298349	0.57848	0	-0.104504
Slc25a42	ENSMUSG00000002346	0.429878	0.433897	0	0.015559
Eif4e	ENSMUSG00000028156	0.322142	0.608474	0	-0.0169732
Pla2g16	ENSMUSG00000060675	0.445292	0.493633	0	0.173086
Crcp	ENSMUSG00000025532	0.405087	0.435931	0	-0.108196
Ftx	ENSMUSG00000086370	0.569135	0.328317	0	0.113677
Serinc5	ENSMUSG00000021703	0.667805	0.240896	0	-0.208753
Lonrf1	ENSMUSG00000039633	0.334237	0.427331	0	-0.0989575
Cass4	ENSMUSG00000074570	0.602649	0.316891	0	0.0843834
Aes	ENSMUSG00000054452	0.566798	0.461491	0	-0.0873079
Pnpla6	ENSMUSG00000004565	0.623789	0.325075	0	0.0378199
Leprotl1	ENSMUSG00000031513	0.743095	0.160597	0	-0.18873
Esyt2	ENSMUSG00000021171	0.793239	0.23858	0	-0.245249
Tspyl1	ENSMUSG00000047514	0.379503	0.467105	0	-0.134926
Prpf18	ENSMUSG00000039449	0.520303	0.33018	0	0.0578665
Sms	ENSMUSG00000071708	0.382893	0.452866	0	0.122902
Slc12a7	ENSMUSG00000017756	0.21525	0.582818	0	-0.0655095
Ccp110	ENSMUSG00000033904	0.459961	0.41797	0	0.20688
Rtel1	ENSMUSG00000038685	0.493699	0.488837	0	-0.0764247
Gsta4	ENSMUSG00000032348	0.459961	0.438676	0	0.498031
Fam219a	ENSMUSG00000028439	0.401548	0.495204	0	0.192275
Atp11b	ENSMUSG00000037400	0.676868	0.243376	0	-0.272281
Cd2	ENSMUSG00000027863	0.628006	0.344719	0	0.102034
Setd7	ENSMUSG00000037111	0.68308	0.262206	0	-0.0504706
Jmy	ENSMUSG00000021690	0.442298	0.471455	0	-0.470243
Ahcyl2	ENSMUSG00000029772	0.82905	0.1652	0	-0.431303
Ambra1	ENSMUSG00000040506	0.417359	0.621595	0	-0.0791744
Runx2	ENSMUSG00000039153	0.66793	0.261187	0	0.248836
AW112010	ENSMUSG00000075010	0.683384	0.213666	0	0.0869208
Siah2	ENSMUSG00000036432	0.4271	0.433897	0	-0.340068
Arsg	ENSMUSG00000020604	0.495601	0.489597	0	-0.380605
Tpk1	ENSMUSG00000029735	0.676056	0.195402	0	0.202282
4833407H14Rik	ENSMUSG00000097779	0.469735	0.499454	0	-0.0790221
Gm26517	ENSMUSG00000097159	0.308813	0.563534	0	0.103923
Atp7a	ENSMUSG00000033792	0.432656	0.438676	0	0.125714
Prdm2	ENSMUSG00000057637	0.456296	0.367453	0	-0.254822
Cmas	ENSMUSG00000030282	0.458026	0.452866	0	-0.313887
Ttc13	ENSMUSG00000037300	0.40125	0.6238	0	-0.353998
Lrrc8b	ENSMUSG00000070639	0.460374	0.485066	0	-0.075161
Fam69c	ENSMUSG00000047992	0.361658	0.451146	0	0.00672054
Pxmp4	ENSMUSG00000000876	0.456968	0.490722	0	-0.0155493
Snx18	ENSMUSG00000042364	0.687554	0.162571	0	-0.225268
Ide	ENSMUSG00000056999	0.477425	0.47043	0	0.0319515
3110002H16Rik	ENSMUSG00000024410	0.470612	0.433897	0	-0.0336377
Bhlhe40	ENSMUSG00000030103	0.607658	0.311404	0	-0.0221844
Mrps27	ENSMUSG00000041632	0.525816	0.299728	0	-0.0383
Coro1a	ENSMUSG00000030707	0.642741	0.356842	0	0.0353965
Tet2	ENSMUSG00000040943	0.458605	0.347786	0	0.0480325
Fcrl1	ENSMUSG00000059994	0.194037	0.620183	0	-0.215714
Arhgap17	ENSMUSG00000030766	0.507756	0.309496	0	0.05371
Tango6	ENSMUSG00000041949	0.563474	0.219338	0	0.200948
Pim1	ENSMUSG00000024014	0.73315	0.301911	0	-0.389086
Nup210	ENSMUSG00000030091	0.711191	0.273381	0	-0.068978
Aph1c	ENSMUSG00000053040	0.321602	0.47043	0	-0.321976
Nptn	ENSMUSG00000032336	0.482321	0.467105	0	-0.170665
Rtn3	ENSMUSG00000024758	0.608915	0.331338	0	0.0606235
9930021J03Rik	ENSMUSG00000046138	0.403847	0.481791	0	-0.30565
Plekhb2	ENSMUSG00000026123	0.507351	0.444398	0	0.202212
Thbd	ENSMUSG00000074743	0.484537	0.495568	0	0.978176
Dusp6	ENSMUSG00000019960	0.774336	0.208985	0	0.243977
Atp2b4	ENSMUSG00000026463	0.626258	0.305632	0	0.066151
Kcnab2	ENSMUSG00000028931	0.593287	0.328592	0	-0.241233
Gfm2	ENSMUSG00000021666	0.45366	0.424801	0	0.292847
Uchl5	ENSMUSG00000018189	0.48543	0.41797	0	-0.183115
Asb2	ENSMUSG00000021200	0.716245	0.211325	0	0.249777
Akap10	ENSMUSG00000047804	0.482106	0.452866	0	-0.21158
Nlrc5	ENSMUSG00000074151	0.787633	0.160597	0	0.325699
Magi3	ENSMUSG00000052539	0.377716	0.427331	0	-0.507563
Rrp15	ENSMUSG00000001305	0.361658	0.473059	0	-0.217956
Rfx5	ENSMUSG00000005774	0.391542	0.479906	0	0.275815
Ints6l	ENSMUSG00000035967	0.54381	0.294766	0	0.0159251
Lpcat3	ENSMUSG00000004270	0.614701	0.230535	0	0.184199
Rnpepl1	ENSMUSG00000026269	0.538242	0.284887	0	0.0232105
Stil	ENSMUSG00000028718	0.357358	0.485876	0	-0.13363
Mdm2	ENSMUSG00000020184	0.429861	0.473059	0	-0.0476388
Cfdp1	ENSMUSG00000031954	0.44888	0.471455	0	-0.00429317
Slc44a2	ENSMUSG00000057193	0.428353	0.56437	0	-0.114134
Zfp219	ENSMUSG00000049295	0.652342	0.248206	0	0.250839
Zfp790	ENSMUSG00000011427	0.483114	0.476036	0	0.293832
Gimap5	ENSMUSG00000043505	0.651143	0.314998	0	0.0237675
C2cd5	ENSMUSG00000030279	0.416796	0.490242	0	0.145239
Kif2a	ENSMUSG00000021693	0.419128	0.452866	0	-0.0012661
Sla2	ENSMUSG00000027636	0.4155	0.377171	0	0.241071
Slc2a1	ENSMUSG00000028645	0.586412	0.293454	0	-0.374589
C330007P06Rik	ENSMUSG00000006423	0.314392	0.625354	0	-0.102745
Kat8	ENSMUSG00000030801	0.366388	0.46904	0	0.0161695
A230050P20Rik	ENSMUSG00000038884	0.450071	0.472497	0	0.225979
Man2a2	ENSMUSG00000038886	0.784846	0.222332	0	-0.200614
Dusp1	ENSMUSG00000024190	0.622675	0.329838	0	-0.0138834
Plcl1	ENSMUSG00000038349	0.745073	0.17686	0	-0.527463
Dusp22	ENSMUSG00000069255	0.656038	0.226433	0	0.0391997
Has1	ENSMUSG00000003665	0.481576	0.481791	0	2.42247
Rnf19a	ENSMUSG00000022280	0.615242	0.384785	0	-0.421437
Cela1	ENSMUSG00000023031	0.499041	0.493319	0	0.450758
Zfp943	ENSMUSG00000053347	0.385622	0.421361	0	-0.100753
Rtn4ip1	ENSMUSG00000019864	0.40727	0.481791	0	0.115563
Tef	ENSMUSG00000022389	0.274821	0.638805	0	0.0271543
Dennd4b	ENSMUSG00000042404	0.485976	0.427331	0	0.0342292
Ust	ENSMUSG00000047712	0.652606	0.245378	0	-0.44502
Slc2a8	ENSMUSG00000026791	0.46049	0.481791	0	-0.0493987
Hist1h2bc	ENSMUSG00000018102	0.470876	0.451146	0	0.428234
Ldb1	ENSMUSG00000025223	0.662753	0.308769	0	-0.156357
Racgap1	ENSMUSG00000023015	0.47898	0.497387	0	-0.127527
Gas2	ENSMUSG00000030498	0.59912	0.199848	0	0.410681
Pcca	ENSMUSG00000041650	0.741865	0.170932	0	-0.173487
Arap2	ENSMUSG00000037999	0.493257	0.44014	0	-0.452565
Sec23ip	ENSMUSG00000055319	0.437535	0.47043	0	0.0649799
Pdk3	ENSMUSG00000035232	0.449922	0.47774	0	-0.00967539
Gadd45b	ENSMUSG00000015312	0.491665	0.494691	0	-0.451086
Arhgap25	ENSMUSG00000030047	0.560355	0.377601	0	-0.2745
Rbpj	ENSMUSG00000039191	0.635392	0.266355	0	0.203857
Mrpl1	ENSMUSG00000029486	0.620178	0.320676	0	0.0607367
Phf20	ENSMUSG00000038116	0.714689	0.19699	0	-0.401429
Wdr60	ENSMUSG00000042050	0.435914	0.440181	0	0.0810856
Clcn5	ENSMUSG00000004317	0.451609	0.481791	0	-0.343932
Grb7	ENSMUSG00000019312	0.462706	0.452866	0	0.0901079
Lnpep	ENSMUSG00000023845	0.613381	0.284887	0	0.0123308
Slc37a1	ENSMUSG00000024036	0.513644	0.441262	0	-0.00423213
Arhgef12	ENSMUSG00000059495	0.600756	0.290621	0	0.00385225
Pfkfb3	ENSMUSG00000026773	0.458317	0.399979	0	-0.16068
Hipk3	ENSMUSG00000027177	0.368786	0.427331	0	0.453041
Dars	ENSMUSG00000026356	0.669418	0.244195	0	0.0925023
Dfna5	ENSMUSG00000029821	0.463781	0.49479	0	0.410088
Gfpt1	ENSMUSG00000029992	0.47683	0.435931	0	0.0304476
Nfya	ENSMUSG00000023994	0.519366	0.309496	0	-0.187138
Cd83	ENSMUSG00000015396	0.454503	0.442149	0	0.161167
Srek1	ENSMUSG00000032621	0.345963	0.440181	0	0.180704
Slc20a1	ENSMUSG00000027397	0.40727	0.452866	0	-0.164555
Cfap45	ENSMUSG00000026546	0.639508	0.245543	0	0.531218
Drg2	ENSMUSG00000020537	0.435385	0.444663	0	-0.00809979
Slc26a2	ENSMUSG00000034320	0.328763	0.435931	0	0.343953
Ddit4	ENSMUSG00000020108	0.61144	0.296442	0	-0.854577
Clpx	ENSMUSG00000015357	0.626832	0.296442	0	-0.0057729
Mesd	ENSMUSG00000038503	0.379734	0.47043	0	-0.0142047
Rabgef1	ENSMUSG00000025340	0.657229	0.213666	0	0.266781
Mettl7a1	ENSMUSG00000054619	0.498842	0.480799	0	0.399863
Hist1h1d	ENSMUSG00000052565	0.493285	0.491086	0	0.134269
Aig1	ENSMUSG00000019806	0.671931	0.213666	0	-0.0141293
Mr1	ENSMUSG00000026471	0.37555	0.471248	0	0.563243
Zbtb25	ENSMUSG00000056459	0.580657	0.289264	0	-0.120123
Il7r	ENSMUSG00000003882	0.606501	0.296365	0	-0.566214
Map3k8	ENSMUSG00000024235	0.45777	0.459928	0	0.131594
Ube2f	ENSMUSG00000034343	0.716651	0.224796	0	-0.267222
Spsb1	ENSMUSG00000039911	0.371911	0.427331	0	-0.390445
Tlr4	ENSMUSG00000039005	0.487877	0.421361	0	-0.609637
Hivep1	ENSMUSG00000021366	0.8103	0.104916	0	0.15351
Socs1	ENSMUSG00000038037	0.636126	0.280907	0	-0.333022
Rara	ENSMUSG00000037992	0.662852	0.278196	0	-0.313519
Smap2	ENSMUSG00000032870	0.708997	0.211318	0	-0.298731
Cyb5a	ENSMUSG00000024646	0.410578	0.449592	0	-0.136147
Tubgcp3	ENSMUSG00000000759	0.37899	0.493649	0	-0.181518
Pnrc1	ENSMUSG00000040128	0.564181	0.239763	0	-0.31742
Ammecr1	ENSMUSG00000042225	0.594615	0.23858	0	0.294089
1500009L16Rik	ENSMUSG00000087651	0.3777	0.464244	0	-0.961577
Zfp655	ENSMUSG00000007812	0.581462	0.278647	0	-0.0426835
Lrrc28	ENSMUSG00000030556	0.36356	0.427331	0	-0.00941467
Nsmaf	ENSMUSG00000028245	0.708193	0.188582	0	0.0672193
Gng2	ENSMUSG00000043004	0.340747	0.568743	0	0.0727981
Rasgrp1	ENSMUSG00000027347	0.490557	0.445515	0	-0.261221
Usp24	ENSMUSG00000028514	0.410578	0.464244	0	-0.0775213
Washc2	ENSMUSG00000024104	0.330434	0.481791	0	-0.0269438
Agpat3	ENSMUSG00000001211	0.671353	0.191982	0	0.0456912
Ldha	ENSMUSG00000063229	0.695945	0.248197	0	-0.114885
Asl	ENSMUSG00000025533	0.481014	0.469867	0	0.136053
Slc3a2	ENSMUSG00000010095	0.571184	0.365759	0	-0.208373
Cog6	ENSMUSG00000027742	0.246717	0.612796	0	-0.0127652
Kifap3	ENSMUSG00000026585	0.292131	0.478864	0	0.175481
Ifi35	ENSMUSG00000010358	0.232737	0.618375	0	0.282166
Pitpnb	ENSMUSG00000050017	0.415787	0.47817	0	-0.123252
Cited2	ENSMUSG00000039910	0.673378	0.240507	0	-0.143018
Trpm2	ENSMUSG00000009292	0.313978	0.459845	0	0.324828
Ahi1	ENSMUSG00000019986	0.624728	0.186055	0	0.348252
Rab8a	ENSMUSG00000003037	0.56779	0.289264	0	-0.0304136
Blvra	ENSMUSG00000001999	0.430903	0.492773	0	0.227453
Mrpl45	ENSMUSG00000018882	0.479939	0.435931	0	0.253429
Lbh	ENSMUSG00000024063	0.422837	0.474337	0	0.439579
B4galnt1	ENSMUSG00000006731	0.655831	0.238018	0	0.147504
Zmynd11	ENSMUSG00000021156	0.542195	0.301911	0	-0.0415928
Sri	ENSMUSG00000003161	0.391989	0.444663	0	0.0622855
Kat2b	ENSMUSG00000000708	0.721744	0.117186	0	-0.249523
Dennd1a	ENSMUSG00000035392	0.357443	0.535763	0	-0.252267
Gpatch8	ENSMUSG00000034621	0.503898	0.323763	0	-0.14911
Sppl3	ENSMUSG00000029550	0.527371	0.331448	0	0.0502672
Itgal	ENSMUSG00000030830	0.575144	0.299728	0	0.0548156
Npnt	ENSMUSG00000040998	0.328763	0.435931	0	0.511674
Armc3	ENSMUSG00000037683	0.57015	0.321194	0	0.295964
Csrp2	ENSMUSG00000020186	0.286062	0.493186	0	0.287168
Nup43	ENSMUSG00000040034	0.352281	0.481791	0	0.171566
Pced1b	ENSMUSG00000044250	0.714785	0.182479	0	-0.0892575
Prkacb	ENSMUSG00000005034	0.601647	0.177865	0	-0.129363
Rchy1	ENSMUSG00000029397	0.313978	0.474498	0	-0.0223824
Ppa2	ENSMUSG00000028013	0.494374	0.355519	0	0.246499
Vps18	ENSMUSG00000034216	0.41243	0.449592	0	-0.016406
Pank4	ENSMUSG00000029056	0.46828	0.496047	0	-0.0644958
St8sia4	ENSMUSG00000040710	0.741965	0.14531	0	0.0343857
Stag2	ENSMUSG00000025862	0.599841	0.226433	0	-0.12796
Prpf39	ENSMUSG00000035597	0.326514	0.484487	0	-0.0265376
Gprin3	ENSMUSG00000045441	0.504945	0.280907	0	-0.125702
Pak1ip1	ENSMUSG00000038683	0.345963	0.444663	0	-0.169215
Pcnx	ENSMUSG00000021140	0.643464	0.140454	0	-0.19968
AI504432	ENSMUSG00000056145	0.617317	0.284887	0	-0.207619
Sap30l	ENSMUSG00000020519	0.477624	0.452866	0	-0.514036
Lrp8	ENSMUSG00000028613	0.515981	0.301911	0	-0.211785
Zbtb3	ENSMUSG00000071661	0.434839	0.467105	0	0.329329
Elf2	ENSMUSG00000037174	0.546018	0.34452	0	-0.396289
Pcmt1	ENSMUSG00000019795	0.543297	0.240838	0	0.0724879
Stom	ENSMUSG00000026880	0.312027	0.494559	0	-0.222796
Ap1ar	ENSMUSG00000074238	0.576004	0.321194	0	0.0764214
Mafb	ENSMUSG00000074622	0.448037	0.41797	0	0.116974
Cry1	ENSMUSG00000020038	0.527346	0.2124	0	0.122543
Cacnb3	ENSMUSG00000003352	0.432028	0.452866	0	-0.253023
Scamp3	ENSMUSG00000028049	0.377915	0.461764	0	0.126665
Map3k5	ENSMUSG00000071369	0.652905	0.252865	0	-0.237945
Stx6	ENSMUSG00000026470	0.617686	0.213666	0	0.09543
Mon2	ENSMUSG00000034602	0.404872	0.486224	0	-0.0912969
Faf1	ENSMUSG00000010517	0.445021	0.315957	0	-0.0646344
Tmem37	ENSMUSG00000050777	0.447971	0.497933	0	-0.488121
Jpt1	ENSMUSG00000020737	0.585993	0.284887	0	-0.0985879
Nedd9	ENSMUSG00000021365	0.442599	0.305905	0	0.454368
Bod1	ENSMUSG00000044502	0.347716	0.452866	0	-0.127718
Csf1	ENSMUSG00000014599	0.376691	0.421361	0	0.334546
Trbv1	ENSMUSG00000076461	0.484438	0.435931	0	-0.103771
Hist1h2be	ENSMUSG00000047246	0.62961	0.301911	0	-0.232693
Nfe2l1	ENSMUSG00000038615	0.713944	0.164886	0	0.250592
Btaf1	ENSMUSG00000040565	0.467602	0.494179	0	-0.185138
Vps51	ENSMUSG00000024797	0.422022	0.444663	0	-0.0511484
Fosl2	ENSMUSG00000029135	0.419327	0.444663	0	-0.704707
Tmem167b	ENSMUSG00000068732	0.406212	0.444663	0	-0.036282
H6pd	ENSMUSG00000028980	0.616553	0.249107	0	0.359198
Sec24c	ENSMUSG00000039367	0.411554	0.433897	0	0.0238489
Nbn	ENSMUSG00000028224	0.339794	0.41797	0	-0.306273
Tmcc2	ENSMUSG00000042066	0.29311	0.522482	0	0.513177
Glg1	ENSMUSG00000003316	0.407799	0.499504	0	-0.0526692
Trps1	ENSMUSG00000038679	0.731567	0.221681	0	0.394138
Ezr	ENSMUSG00000052397	0.595752	0.351714	0	-0.318872
N4bp2	ENSMUSG00000037795	0.572685	0.32728	0	-0.134733
Txn1	ENSMUSG00000028367	0.366107	0.496891	0	0.10757
Zscan18	ENSMUSG00000070822	0.361013	0.496907	0	-0.536081
Aplp1	ENSMUSG00000006651	0.54994	0.332076	0	-0.139446
Syt11	ENSMUSG00000068923	0.468743	0.46904	0	0.0410705
Fabp4	ENSMUSG00000062515	0.441223	0.433897	0	1.01431
Mapkapk3	ENSMUSG00000032577	0.610535	0.189574	0	0.444174
Cyfip1	ENSMUSG00000030447	0.325009	0.421361	0	-0.0266734
Tmem143	ENSMUSG00000002781	0.598463	0.301911	0	0.297429
Fermt3	ENSMUSG00000024965	0.306244	0.627295	0	0.0172386
Ccser2	ENSMUSG00000058690	0.471908	0.375563	0	-0.105229
Hk2	ENSMUSG00000000628	0.632974	0.265462	0	-0.363221
Pdss2	ENSMUSG00000038240	0.35324	0.440181	0	-0.142734
Bcl2l1	ENSMUSG00000007659	0.729706	0.174399	0	0.38075
Arc	ENSMUSG00000022602	0.609676	0.321194	0	-0.507062
Rhbdd1	ENSMUSG00000026142	0.398918	0.237249	0	0.233539
Npm1	ENSMUSG00000057113	0.409619	0.477161	0	-0.139572
Bmt2	ENSMUSG00000042742	0.430143	0.486488	0	-0.0663211
Slc12a2	ENSMUSG00000024597	0.368868	0.469867	0	0.412516
Jdp2	ENSMUSG00000034271	0.51033	0.348798	0	0.574767
Orai2	ENSMUSG00000039747	0.582961	0.296442	0	-0.0082826
Eci2	ENSMUSG00000021417	0.404823	0.438676	0	-0.0318807
Pcbp3	ENSMUSG00000001120	0.655463	0.185698	0	0.178942
Nanp	ENSMUSG00000053916	0.340787	0.496709	0	0.295755
Fam234b	ENSMUSG00000030207	0.285185	0.49231	0	-0.16348
Fam98b	ENSMUSG00000027349	0.409784	0.444663	0	0.0820436
Sesn3	ENSMUSG00000032009	0.617802	0.226433	0	-0.441965
Oplah	ENSMUSG00000022562	0.420567	0.465749	0	0.0721095
Sc5d	ENSMUSG00000032018	0.371432	0.491814	0	0.373587
Ado	ENSMUSG00000057134	0.444018	0.478864	0	-0.144379
Snapin	ENSMUSG00000001018	0.40727	0.492971	0	0.0592307
Gorasp2	ENSMUSG00000014959	0.41625	0.421361	0	0.0553827
Hk3	ENSMUSG00000025877	0.609819	0.289264	0	1.00195
Alg9	ENSMUSG00000032059	0.612719	0.301282	0	0.00117468
Cd47	ENSMUSG00000055447	0.488552	0.386657	0	-0.141488
Tespa1	ENSMUSG00000034833	0.663785	0.194026	0	-0.0872469
Carmil2	ENSMUSG00000050357	0.416432	0.471455	0	-0.0137088
Trib1	ENSMUSG00000032501	0.699792	0.191546	0	-0.562611
Tmem242	ENSMUSG00000004945	0.421526	0.424801	0	-0.0180769
Srgn	ENSMUSG00000020077	0.715304	0.198505	0	-0.453027
Pts	ENSMUSG00000032067	0.340687	0.442149	0	0.153601
Atp6v0d1	ENSMUSG00000013160	0.404872	0.452866	0	-0.183923
Ift80	ENSMUSG00000027778	0.579706	0.217965	0	0.327406
Mib1	ENSMUSG00000024294	0.554174	0.2832	0	-0.0562092
Agpat4	ENSMUSG00000023827	0.650746	0.174372	0	-0.479523
Prkar2b	ENSMUSG00000002997	0.587537	0.247205	0	-0.404863
Mms22l	ENSMUSG00000045751	0.556213	0.324017	0	0.128191
Strap	ENSMUSG00000030224	0.335048	0.495998	0	-0.129078
Pcsk7	ENSMUSG00000035382	0.32314	0.452866	0	0.0116342
Dhx9	ENSMUSG00000042699	0.285053	0.576655	0	-0.0558835
Lrrc20	ENSMUSG00000037151	0.405087	0.452866	0	0.150613
Nr1h3	ENSMUSG00000002108	0.438015	0.467105	0	0.627213
Smim3	ENSMUSG00000038059	0.671542	0.255875	0	-0.563555
Pptc7	ENSMUSG00000038582	0.657951	0.280924	0	-0.37512
Rftn1	ENSMUSG00000039316	0.440543	0.348328	0	-0.000928923
Rassf5	ENSMUSG00000026430	0.554852	0.303537	0	0.118868
Faap100	ENSMUSG00000025384	0.478831	0.452866	0	-0.342133
Polr1a	ENSMUSG00000049553	0.531558	0.366785	0	-0.115075
Casp9	ENSMUSG00000028914	0.310885	0.449592	0	0.433237
Fanci	ENSMUSG00000039187	0.672841	0.216948	0	-0.00370851
Sdhaf2	ENSMUSG00000024668	0.4786	0.438676	0	0.121119
Zmym2	ENSMUSG00000021945	0.548275	0.232569	0	-0.153105
Thada	ENSMUSG00000024251	0.588545	0.301981	0	-0.35855
Skp1a	ENSMUSG00000036309	0.369513	0.427331	0	-0.217967
Scarb2	ENSMUSG00000029426	0.656713	0.173559	0	-0.167941
Rab11fip3	ENSMUSG00000037098	0.304257	0.547878	0	-0.137282
Fbxo31	ENSMUSG00000052934	0.595434	0.249934	0	-0.056015
Nars	ENSMUSG00000024587	0.26836	0.584031	0	0.057861
Coro7	ENSMUSG00000039637	0.458324	0.47817	0	-0.109016
Gpr132	ENSMUSG00000021298	0.690575	0.146727	0	-0.578592
Numa1	ENSMUSG00000066306	0.494989	0.31878	0	-0.0811297
Plbd2	ENSMUSG00000029598	0.588639	0.299728	0	0.0368112
Snapc1	ENSMUSG00000021113	0.484041	0.421361	0	-0.183293
Srsf4	ENSMUSG00000028911	0.541042	0.316795	0	0.215051
Mtf1	ENSMUSG00000028890	0.351603	0.438676	0	0.0803799
Enpp1	ENSMUSG00000037370	0.580629	0.324502	0	-0.239384
Tnpo1	ENSMUSG00000009470	0.733527	0.137655	0	-0.263603
Map3k10	ENSMUSG00000040390	0.36485	0.440181	0	0.0160397
E4f1	ENSMUSG00000024137	0.504361	0.33147	0	-0.136979
Itga3	ENSMUSG00000001507	0.383472	0.435931	0	0.054074
Fbxw11	ENSMUSG00000020271	0.478001	0.375596	0	-0.426437
Intu	ENSMUSG00000060798	0.203938	0.564108	0	0.238966
Agl	ENSMUSG00000033400	0.410578	0.427331	0	0.522976
1110059E24Rik	ENSMUSG00000035171	0.322313	0.452866	0	-0.419243
Pnkp	ENSMUSG00000002963	0.401432	0.451146	0	-0.0753989
Dvl2	ENSMUSG00000020888	0.385341	0.474498	0	0.243076
Klhdc10	ENSMUSG00000029775	0.435799	0.421361	0	0.144152
Rhobtb2	ENSMUSG00000022075	0.336387	0.499322	0	-0.27295
Foxo3	ENSMUSG00000048756	0.597195	0.232122	0	-0.23482
Extl2	ENSMUSG00000027963	0.40727	0.452866	0	-0.220261
Zfp275	ENSMUSG00000031365	0.297671	0.459845	0	0.0682405
Unc119b	ENSMUSG00000046562	0.50306	0.389349	0	0.286631
Wdr61	ENSMUSG00000061559	0.309347	0.47774	0	0.172571
Ly75	ENSMUSG00000026980	0.559118	0.170932	0	0.196547
Abhd12	ENSMUSG00000032046	0.586214	0.330533	0	0.138848
Bbc3	ENSMUSG00000002083	0.562961	0.244939	0	0.284027
Sh2b3	ENSMUSG00000042594	0.561098	0.328647	0	-0.516389
Rab4b	ENSMUSG00000053291	0.35797	0.493037	0	-0.0512001
Mcm5	ENSMUSG00000005410	0.312027	0.421361	0	0.0443741
Mgat5	ENSMUSG00000036155	0.426326	0.361666	0	0.32117
Sh3bgrl2	ENSMUSG00000032261	0.454272	0.325257	0	-0.383452
Extl3	ENSMUSG00000021978	0.499686	0.332705	0	0.0191368
Lpxn	ENSMUSG00000024696	0.495899	0.41797	0	0.0492995
Fxyd5	ENSMUSG00000009687	0.408775	0.462376	0	0.162524
Eif3d	ENSMUSG00000016554	0.496246	0.427331	0	-0.00713611
Baz2b	ENSMUSG00000026987	0.463778	0.361731	0	0.0886699
Rbm33	ENSMUSG00000048271	0.731764	0.11942	0	-0.261681
Galnt10	ENSMUSG00000020520	0.401239	0.476075	0	-0.49544
Neil2	ENSMUSG00000035121	0.496477	0.306563	0	0.285411
Sec11a	ENSMUSG00000025724	0.549576	0.312694	0	-0.159265
Igf2r	ENSMUSG00000023830	0.551629	0.174372	0	0.333773
Cd99l2	ENSMUSG00000035776	0.426992	0.457315	0	-0.15423
Herc1	ENSMUSG00000038664	0.1631	0.676959	0	-0.167337
Cobll1	ENSMUSG00000034903	0.668379	0.0982554	0	0.0486695
BC025920	ENSMUSG00000074862	0.561947	0.330599	0	-0.00714056
Itpr1	ENSMUSG00000030102	0.588291	0.221847	0	0.482097
Cd200r1	ENSMUSG00000022667	0.485628	0.176072	0	0.192138
Inpp4a	ENSMUSG00000026113	0.512398	0.329618	0	-0.161496
Trpc4ap	ENSMUSG00000038324	0.374855	0.473059	0	-0.0937064
Ubl3	ENSMUSG00000001687	0.524179	0.311073	0	-0.560064
Dapp1	ENSMUSG00000028159	0.518824	0.273802	0	-0.287248
Myl12b	ENSMUSG00000034868	0.636978	0.240896	0	-0.158831
Cdk8	ENSMUSG00000029635	0.361658	0.459845	0	0.109411
Ksr1	ENSMUSG00000018334	0.537142	0.2747	0	0.0647138
Zfp148	ENSMUSG00000022811	0.574913	0.278647	0	-0.0303285
Bcl7c	ENSMUSG00000030814	0.409453	0.478864	0	-0.0434262
Kmt2d	ENSMUSG00000048154	0.478153	0.427331	0	0.0186972
Iffo2	ENSMUSG00000041025	0.566484	0.335602	0	-0.383913
Suclg2	ENSMUSG00000061838	0.368356	0.349684	0	-0.143702
Nab1	ENSMUSG00000002881	0.52113	0.325891	0	-0.195689
Tmbim4	ENSMUSG00000020225	0.292881	0.575673	0	0.210228
Tnfrsf10b	ENSMUSG00000022074	0.543314	0.318493	0	-0.472056
Zkscan1	ENSMUSG00000029729	0.30938	0.459845	0	-0.201256
Myc	ENSMUSG00000022346	0.563931	0.289264	0	-0.34443
Phf21a	ENSMUSG00000058318	0.614552	0.213666	0	-0.150885
Ccdc88b	ENSMUSG00000047810	0.33131	0.461764	0	-0.00723366
Taf3	ENSMUSG00000025782	0.4321	0.280907	0	-0.0935501
Mfsd14a	ENSMUSG00000089911	0.540204	0.280907	0	-0.408131
Lemd3	ENSMUSG00000048661	0.339397	0.444663	0	-0.245789
Rap1gds1	ENSMUSG00000028149	0.728786	0.110045	0	-0.38612
Jak2	ENSMUSG00000024789	0.630763	0.270882	0	-0.584043
Ankrd55	ENSMUSG00000049985	0.323697	0.317589	0	0.719651
Il1r2	ENSMUSG00000026073	0.225184	0.59273	0	0.847357
Zfp444	ENSMUSG00000044876	0.565828	0.284887	0	-0.110248
Zfp639	ENSMUSG00000027667	0.366586	0.41797	0	-0.308108
Nsd3	ENSMUSG00000054823	0.379657	0.477359	0	-0.263067
Slfn3	ENSMUSG00000018986	0.443357	0.435931	0	0.187995
Fmnl2	ENSMUSG00000036053	0.407609	0.461052	0	0.525545
Wdr19	ENSMUSG00000037890	0.403367	0.463153	0	0.348716
Ddx46	ENSMUSG00000021500	0.379337	0.444663	0	-0.111264
Sgms1	ENSMUSG00000040451	0.575653	0.282079	0	-0.23117
Atxn7l1os2	ENSMUSG00000085664	0.430324	0.463153	0	0.232724
Serbp1	ENSMUSG00000036371	0.371911	0.433897	0	-0.0481421
Zmym3	ENSMUSG00000031310	0.352413	0.469867	0	0.0780913
Pafah1b2	ENSMUSG00000003131	0.559058	0.307379	0	-0.036006
Pigl	ENSMUSG00000014245	0.417518	0.328647	0	0.298826
Nbas	ENSMUSG00000020576	0.287892	0.456234	0	0.396111
Cd28	ENSMUSG00000026012	0.707119	0.148221	0	-0.421582
Sag	ENSMUSG00000056055	0.430209	0.435931	0	-0.093511
Msl1	ENSMUSG00000052915	0.356895	0.471455	0	0.0390019
Tmem156	ENSMUSG00000037913	0.593003	0.249967	0	-0.418158
9330136K24Rik	ENSMUSG00000097781	0.633943	0.24895	0	0.121746
Ptgir	ENSMUSG00000043017	0.287919	0.592884	0	0.107246
Specc1l	ENSMUSG00000033444	0.447983	0.334667	0	-0.264019
Rasa4	ENSMUSG00000004952	0.296481	0.495518	0	0.402455
Mettl15	ENSMUSG00000057234	0.345963	0.452866	0	0.364043
Irak1	ENSMUSG00000031392	0.311514	0.46904	0	0.0805598
Dclk2	ENSMUSG00000028078	0.478076	0.300764	0	-0.0313278
Wdfy1	ENSMUSG00000073643	0.596519	0.276486	0	0.0158538
Nfkbie	ENSMUSG00000023947	0.505981	0.290621	0	-0.098857
Uqcc1	ENSMUSG00000005882	0.514162	0.290621	0	-0.048524
Prickle1	ENSMUSG00000036158	0.576351	0.162593	0	-0.0555674
Cpox	ENSMUSG00000022742	0.321701	0.41797	0	0.0462096
Rbl2	ENSMUSG00000031666	0.532676	0.170932	0	0.338541
Rnf141	ENSMUSG00000030788	0.318476	0.463153	0	-0.0743163
Agps	ENSMUSG00000042410	0.547999	0.278647	0	0.105191
Fes	ENSMUSG00000053158	0.46608	0.421361	0	-0.116857
H2-Q10	ENSMUSG00000067235	0.369563	0.480369	0	0.228665
Rngtt	ENSMUSG00000028274	0.370383	0.353938	0	0.106769
Dohh	ENSMUSG00000078440	0.359194	0.427331	0	-0.0817719
Rcbtb1	ENSMUSG00000035469	0.428009	0.463153	0	-0.0252861
Etv6	ENSMUSG00000030199	0.752411	0.116447	0	-0.311992
Scarb1	ENSMUSG00000037936	0.345963	0.442149	0	0.32174
Mrps21	ENSMUSG00000054312	0.36356	0.481791	0	0.142029
Zfp3	ENSMUSG00000043602	0.35625	0.433897	0	0.0787818
Spag4	ENSMUSG00000038180	0.300615	0.496759	0	-0.350986
Wasl	ENSMUSG00000029684	0.339067	0.427331	0	-0.303213
Phlpp1	ENSMUSG00000044340	0.415312	0.215307	0	-0.195261
Ptk2	ENSMUSG00000022607	0.574802	0.306563	0	-0.345972
Dclk1	ENSMUSG00000027797	0.360151	0.302863	0	1.07276
Cd247	ENSMUSG00000005763	0.598292	0.205718	0	-0.331171
Rnf125	ENSMUSG00000033107	0.460917	0.412965	0	-0.471912
Dnajc1	ENSMUSG00000026740	0.529984	0.329309	0	0.352673
Cisd2	ENSMUSG00000028165	0.355439	0.474498	0	-0.0340215
Slc43a2	ENSMUSG00000038178	0.378505	0.459889	0	0.278685
Mynn	ENSMUSG00000037730	0.602107	0.222332	0	-0.45112
Sla	ENSMUSG00000022372	0.621926	0.217885	0	-0.236119
Rrp12	ENSMUSG00000035049	0.533589	0.328184	0	-0.0796713
Ap5b1	ENSMUSG00000049562	0.593402	0.284887	0	0.0308892
Flnb	ENSMUSG00000025278	0.634017	0.102188	0	-0.0761939
Hacd3	ENSMUSG00000033629	0.412761	0.311608	0	0.250168
Ptpn22	ENSMUSG00000027843	0.547448	0.239708	0	-0.160747
Osbpl3	ENSMUSG00000029822	0.502815	0.273491	0	0.204409
Ncbp1	ENSMUSG00000028330	0.318741	0.451923	0	-0.021102
Cfap126	ENSMUSG00000026649	0.580227	0.226433	0	0.953894
Cdc7	ENSMUSG00000029283	0.371911	0.465749	0	0.0635113
Shisa5	ENSMUSG00000025647	0.532353	0.347563	0	0.223075
Plp2	ENSMUSG00000031146	0.415126	0.444663	0	0.00628721
Ralgapa2	ENSMUSG00000037110	0.383224	0.444969	0	-0.0323829
Ppp3cc	ENSMUSG00000022092	0.60407	0.252657	0	-0.320481
Eya3	ENSMUSG00000028886	0.518131	0.320246	0	0.126651
Runx1	ENSMUSG00000022952	0.54581	0.258319	0	0.0810022
Tspan32os	ENSMUSG00000052281	0.507448	0.331657	0	0.165559
Myo18a	ENSMUSG00000000631	0.41016	0.451522	0	0.109685
Pde5a	ENSMUSG00000053965	0.317484	0.444663	0	1.53659
Phf2	ENSMUSG00000038025	0.432177	0.301911	0	-0.0342331
Lsm4	ENSMUSG00000031848	0.529201	0.289264	0	-0.227299
Il15ra	ENSMUSG00000023206	0.383091	0.452866	0	0.153774
Tagap	ENSMUSG00000033450	0.654589	0.195402	0	-0.265546
Il17rc	ENSMUSG00000030281	0.380974	0.478864	0	0.322866
Prdm15	ENSMUSG00000014039	0.294281	0.41797	0	0.0459621
Crtc2	ENSMUSG00000027936	0.367148	0.427331	0	-0.010327
Mctp1	ENSMUSG00000021596	0.199881	0.459308	0	-0.0638993
Tnik	ENSMUSG00000027692	0.40246	0.389692	0	0.224821
Tonsl	ENSMUSG00000059323	0.444862	0.433897	0	0.132041
Thap1	ENSMUSG00000037214	0.383091	0.493037	0	0.138983
Tbc1d14	ENSMUSG00000029192	0.526408	0.29	0	0.135542
Id1	ENSMUSG00000042745	0.382248	0.491086	0	0.142132
Rrp1b	ENSMUSG00000058392	0.569113	0.306563	0	-0.148313
Gtf2a1	ENSMUSG00000020962	0.430027	0.234371	0	0.0376917
Gpr19	ENSMUSG00000032641	0.555001	0.300764	0	-0.142613
St6galnac6	ENSMUSG00000026811	0.484166	0.390223	0	0.326617
Zbtb1	ENSMUSG00000033454	0.689043	0.148221	0	-0.0789725
AI847159	ENSMUSG00000084826	0.559764	0.294766	0	0.280199
Soat1	ENSMUSG00000026600	0.387821	0.294766	0	0.161143
Peli1	ENSMUSG00000020134	0.396694	0.435418	0	-0.498328
Rmi2	ENSMUSG00000037991	0.570875	0.23858	0	-0.101883
Id3	ENSMUSG00000007872	0.30938	0.444663	0	0.583589
Adck5	ENSMUSG00000022550	0.292958	0.495386	0	0.295695
Map9	ENSMUSG00000033900	0.327699	0.299728	0	0.0974395
Zfp236	ENSMUSG00000041258	0.331178	0.451923	0	-0.0124198
Hibch	ENSMUSG00000041426	0.442386	0.2832	0	0.115555
Taz	ENSMUSG00000009995	0.333146	0.459845	0	-0.00223662
Nln	ENSMUSG00000021710	0.211243	0.489176	0	0.300283
Dsn1	ENSMUSG00000027635	0.342705	0.427331	0	-0.0598491
Pdcd5	ENSMUSG00000030417	0.327506	0.444663	0	-0.224966
Agpat5	ENSMUSG00000031467	0.384613	0.427331	0	0.0357771
Prkcd	ENSMUSG00000021948	0.211017	0.633359	0	0.12235
Sdf4	ENSMUSG00000029076	0.528517	0.315373	0	0.035723
Tbc1d2b	ENSMUSG00000037410	0.626294	0.113217	0	-0.0897204
Rinl	ENSMUSG00000051735	0.656514	0.175471	0	-0.107999
Frs2	ENSMUSG00000020170	0.629631	0.237377	0	-0.346772
Smad2	ENSMUSG00000024563	0.287153	0.41797	0	-0.0545205
Itpkb	ENSMUSG00000038855	0.602336	0.189445	0	-0.36039
Itga1	ENSMUSG00000042284	0.355836	0.496626	0	0.600527
Gm14005	ENSMUSG00000074813	0.531627	0.233944	0	-0.0650685
Rpgr	ENSMUSG00000031174	0.297671	0.444663	0	0.359506
Zfp467	ENSMUSG00000068551	0.345963	0.493715	0	0.486723
Phf14	ENSMUSG00000029629	0.407403	0.301282	0	0.0598138
Ybx1	ENSMUSG00000028639	0.438671	0.314303	0	-0.110657
Itpr2	ENSMUSG00000030287	0.495069	0.302448	0	-0.135202
Tgif1	ENSMUSG00000047407	0.61491	0.134701	0	-0.304965
Irgq	ENSMUSG00000041037	0.415126	0.41797	0	0.206675
Heca	ENSMUSG00000039879	0.430997	0.315957	0	-0.202055
Slamf6	ENSMUSG00000015314	0.620448	0.239763	0	-0.484179
Triobp	ENSMUSG00000033088	0.356829	0.449592	0	0.0573549
Rpap2	ENSMUSG00000033773	0.239846	0.468602	0	0.0529642
Psme4	ENSMUSG00000040850	0.418682	0.41797	0	-0.0875922
Sh3rf1	ENSMUSG00000031642	0.397456	0.316127	0	-0.0126305
Arid3a	ENSMUSG00000019564	0.61905	0.222332	0	0.0769244
Chd1	ENSMUSG00000023852	0.505595	0.284044	0	-0.18164
Fgd3	ENSMUSG00000037946	0.564395	0.167992	0	0.144665
Orai3	ENSMUSG00000043964	0.36862	0.461069	0	0.343604
Mvd	ENSMUSG00000006517	0.502652	0.280907	0	0.00212964
Cox6a1	ENSMUSG00000041697	0.335594	0.481014	0	-0.045551
Spns1	ENSMUSG00000030741	0.392617	0.438676	0	-0.0965675
Slc9a8	ENSMUSG00000039463	0.435914	0.427331	0	0.0625511
Dgcr6	ENSMUSG00000003531	0.3691	0.493914	0	0.0405116
Acss1	ENSMUSG00000027452	0.385374	0.459845	0	-0.308996
Ube2j2	ENSMUSG00000023286	0.424536	0.41797	0	-0.121915
Pprc1	ENSMUSG00000055491	0.143891	0.693588	0	-0.113035
Glb1	ENSMUSG00000045594	0.528998	0.190137	0	-0.0238334
Rock1	ENSMUSG00000024290	0.300615	0.438676	0	0.00690267
Creld1	ENSMUSG00000030284	0.469189	0.328129	0	0.364729
Itgb8	ENSMUSG00000025321	0.23027	0.469876	0	-0.315207
Fnbp1	ENSMUSG00000075415	0.587649	0.212902	0	0.176001
Fam102a	ENSMUSG00000039157	0.610035	0.173559	0	-0.356666
Hif1a	ENSMUSG00000021109	0.414302	0.369179	0	-0.262635
Irgm1	ENSMUSG00000046879	0.370456	0.492475	0	0.339241
Sytl2	ENSMUSG00000030616	0.421369	0.34404	0	-0.0263853
Trim37	ENSMUSG00000018548	0.364668	0.473059	0	0.18611
Kif23	ENSMUSG00000032254	0.4178	0.284887	0	-0.185196
Ascc1	ENSMUSG00000044475	0.406361	0.451262	0	-0.116627
Nkiras2	ENSMUSG00000017837	0.400208	0.459845	0	-0.0300853
Eif4g1	ENSMUSG00000045983	0.357044	0.480369	0	0.0302445
Zfp449	ENSMUSG00000073176	0.312027	0.452866	0	0.694692
Trmu	ENSMUSG00000022386	0.394354	0.452866	0	0.104589
Zpr1	ENSMUSG00000032078	0.380396	0.473059	0	-0.211604
Nfe2l2	ENSMUSG00000015839	0.562101	0.301911	0	-0.415891
Mtf2	ENSMUSG00000029267	0.421708	0.421361	0	0.0124534
Ptprk	ENSMUSG00000019889	0.620576	0.098814	0	0.390144
Bcas3	ENSMUSG00000059439	0.529719	0.192148	0	-0.000720084
Med15	ENSMUSG00000012114	0.569268	0.284887	0	-0.0808681
Dlg2	ENSMUSG00000052572	0.418152	0.225962	0	0.655881
Galnt12	ENSMUSG00000039774	0.286244	0.452866	0	0.359339
Pld3	ENSMUSG00000003363	0.289326	0.561618	0	0.170741
Cdc42se2	ENSMUSG00000052298	0.596087	0.239085	0	-0.183511
Nudt3	ENSMUSG00000024213	0.371845	0.486753	0	-0.0538876
Ywhae	ENSMUSG00000020849	0.380148	0.435931	0	-0.0244801
Cacfd1	ENSMUSG00000015488	0.305907	0.469867	0	0.0468401
Gna15	ENSMUSG00000034792	0.270254	0.553283	0	0.195495
Gimap8	ENSMUSG00000064262	0.339927	0.489879	0	0.0434017
Smg9	ENSMUSG00000002210	0.219176	0.618077	0	-0.285326
Ramp1	ENSMUSG00000034353	0.344491	0.400187	0	0.616326
Gnai2	ENSMUSG00000032562	0.601851	0.247858	0	-0.000760994
Lrig1	ENSMUSG00000030029	0.603038	0.167233	0	-0.409787
Ska3	ENSMUSG00000021965	0.377171	0.461764	0	-0.0563031
Top1mt	ENSMUSG00000000934	0.351222	0.474978	0	0.268783
4930581F22Rik	ENSMUSG00000070315	0.322512	0.438676	0	-0.178943
Pkig	ENSMUSG00000035268	0.333146	0.41797	0	0.304307
Kat6b	ENSMUSG00000021767	0.560642	0.188274	0	-0.0305068
Panx1	ENSMUSG00000031934	0.564909	0.204376	0	0.0500122
Tmem55a	ENSMUSG00000028221	0.355836	0.424801	0	0.0674846
Tex15	ENSMUSG00000009628	0.315648	0.424801	0	-0.212089
Slc35e1	ENSMUSG00000019731	0.367099	0.485728	0	-0.225247
Zfp608	ENSMUSG00000052713	0.524725	0.12939	0	0.373925
Dyrk3	ENSMUSG00000016526	0.304221	0.47043	0	-0.0768092
Srebf2	ENSMUSG00000022463	0.376663	0.463032	0	-0.20366
Bcl2	ENSMUSG00000057329	0.628433	0.196514	0	-0.454213
Ptprs	ENSMUSG00000013236	0.425743	0.320406	0	0.299427
Iqgap1	ENSMUSG00000030536	0.4181	0.385509	0	0.0558863
Tecpr2	ENSMUSG00000021275	0.585263	0.246577	0	0.086317
Casd1	ENSMUSG00000015189	0.367066	0.444663	0	0.0764767
1810032O08Rik	ENSMUSG00000020812	0.299375	0.467105	0	-0.183493
Zcchc6	ENSMUSG00000035248	0.373168	0.47043	0	-0.0163174
Ski	ENSMUSG00000029050	0.482942	0.2635	0	-0.172036
Fto	ENSMUSG00000055932	0.388091	0.2778	0	-0.0146573
Tnfaip8	ENSMUSG00000062210	0.650349	0.196916	0	-0.552281
Bpnt1	ENSMUSG00000026617	0.3755	0.459845	0	-0.150903
Cyc1	ENSMUSG00000022551	0.3691	0.465749	0	-0.0467285
Arl4a	ENSMUSG00000047446	0.522349	0.153282	0	0.31991
Foxn2	ENSMUSG00000034998	0.464889	0.226433	0	-0.274469
Rufy2	ENSMUSG00000020070	0.326713	0.46904	0	0.139918
Dse	ENSMUSG00000039497	0.361658	0.421361	0	-0.367257
Mtch1	ENSMUSG00000024012	0.283746	0.486571	0	-0.00297138
Galnt6	ENSMUSG00000037280	0.376123	0.456587	0	-0.239332
Maml2	ENSMUSG00000031925	0.588373	0.189047	0	-0.192026
Ubr2	ENSMUSG00000023977	0.270383	0.455788	0	-0.0917046
Zfp280b	ENSMUSG00000049764	0.327093	0.444663	0	-0.259827
Lmo7	ENSMUSG00000033060	0.300268	0.289264	0	0.446123
Gm8369	ENSMUSG00000058470	0.53143	0.281107	0	0.190602
Tnfaip8l2	ENSMUSG00000013707	0.45199	0.3105	0	-0.0647576
Pik3c3	ENSMUSG00000033628	0.461471	0.280907	0	-0.167929
Tapt1	ENSMUSG00000046985	0.328763	0.461764	0	-0.0882652
Myo9b	ENSMUSG00000004677	0.244625	0.463153	0	-0.0647727
Icosl	ENSMUSG00000000732	0.192108	0.611242	0	0.462793
Mknk2	ENSMUSG00000020190	0.602317	0.137655	0	0.0198208
E430024P14Rik	ENSMUSG00000090069	0.550543	0.266142	0	-0.216841
Glipr1	ENSMUSG00000056888	0.416771	0.216948	0	-0.0583783
Cic	ENSMUSG00000005442	0.561711	0.170932	0	-0.0633396
Il12rb2	ENSMUSG00000018341	0.641802	0.179837	0	-1.20561
Arpc2	ENSMUSG00000006304	0.55895	0.249611	0	-0.0607274
Disc1	ENSMUSG00000043051	0.397472	0.42103	0	-0.160381
Gata3	ENSMUSG00000015619	0.525337	0.150955	0	0.113462
Gxylt1	ENSMUSG00000036197	0.380941	0.239432	0	-0.256144
Sfpq	ENSMUSG00000028820	0.541858	0.289264	0	-0.035746
D1Ertd622e	ENSMUSG00000044768	0.487635	0.323377	0	-0.173933
Prrc2b	ENSMUSG00000039262	0.357946	0.417432	0	0.113957
Jak1	ENSMUSG00000028530	0.492907	0.277945	0	-0.10347
Nemp2	ENSMUSG00000043015	0.391175	0.379149	0	-0.275194
Fam214b	ENSMUSG00000036002	0.517316	0.222332	0	-0.0227193
Cyth4	ENSMUSG00000018008	0.657758	0.163464	0	0.183202
Sord	ENSMUSG00000027227	0.370076	0.451923	0	-0.2851
Nceh1	ENSMUSG00000027698	0.477684	0.332992	0	-0.159931
Dnmt3a	ENSMUSG00000020661	0.617454	0.113217	0	0.467151
Vangl2	ENSMUSG00000026556	0.558264	0.213666	0	0.677604
Lpp	ENSMUSG00000033306	0.621272	0.20887	0	-0.239724
Fanca	ENSMUSG00000032815	0.300615	0.444663	0	0.00556596
Scamp2	ENSMUSG00000040188	0.199693	0.590051	0	0.178486
Coa6	ENSMUSG00000051671	0.282059	0.449592	0	0.126101
Add3	ENSMUSG00000025026	0.713287	0.0884299	0	-0.391395
Relt	ENSMUSG00000008318	0.328763	0.496907	0	-0.130716
Acsl4	ENSMUSG00000031278	0.559625	0.127047	0	-0.149511
Dnaja3	ENSMUSG00000004069	0.296365	0.525651	0	0.016888
Ptch1	ENSMUSG00000021466	0.50779	0.234905	0	0.259923
Araf	ENSMUSG00000001127	0.53007	0.186842	0	0.0553538
Pik3r1	ENSMUSG00000041417	0.490361	0.23213	0	0.0400355
Tnip3	ENSMUSG00000044162	0.546267	0.203486	0	0.981535
Nsmce1	ENSMUSG00000030750	0.61288	0.187947	0	-0.228461
N4bp1	ENSMUSG00000031652	0.443482	0.186488	0	-0.0817503
Rnf152	ENSMUSG00000047496	0.116032	0.567784	0	-0.660122
Mier1	ENSMUSG00000028522	0.385032	0.321194	0	0.113725
Hsf1	ENSMUSG00000022556	0.386763	0.421361	0	-0.0573985
Ehd4	ENSMUSG00000027293	0.460975	0.296442	0	0.306322
Ptpn6	ENSMUSG00000004266	0.369712	0.434947	0	0.518922
Arl3	ENSMUSG00000025035	0.290295	0.481791	0	0.363077
Ing4	ENSMUSG00000030330	0.334122	0.487778	0	-0.0924584
Ntf5	ENSMUSG00000074121	0.281266	0.427331	0	0.425484
Itk	ENSMUSG00000020395	0.589885	0.187011	0	-0.420892
Cdk17	ENSMUSG00000020015	0.612627	0.172151	0	-0.01793
Trmo	ENSMUSG00000028331	0.52898	0.280907	0	-0.0922365
Lpin1	ENSMUSG00000020593	0.516186	0.12397	0	-0.00672978
Tmtc4	ENSMUSG00000041594	0.310489	0.424801	0	-0.229343
Slc30a4	ENSMUSG00000005802	0.292958	0.463153	0	-0.189103
Llgl1	ENSMUSG00000020536	0.335048	0.465749	0	0.00241983
2010111I01Rik	ENSMUSG00000021458	0.651952	0.128837	0	0.168747
Dolpp1	ENSMUSG00000026856	0.300615	0.474498	0	0.0572141
Tnip1	ENSMUSG00000020400	0.585493	0.170932	0	0.0463034
Gdpd5	ENSMUSG00000035314	0.151992	0.474801	0	0.502901
Crybg3	ENSMUSG00000091562	0.295918	0.442149	0	0.0111576
Pigx	ENSMUSG00000023791	0.489829	0.294766	0	0.109864
Urm1	ENSMUSG00000069020	0.509697	0.2832	0	-0.252342
Ets1	ENSMUSG00000032035	0.562026	0.256908	0	-0.425007
Il18r1	ENSMUSG00000026070	0.42565	0.320935	0	-0.223028
Ldlrad4	ENSMUSG00000024544	0.3698	0.32777	0	0.0372874
Nebl	ENSMUSG00000053702	0.596531	0.0863596	0	-0.177512
Plec	ENSMUSG00000022565	0.675849	0.121044	0	0.281459
Ptprj	ENSMUSG00000025314	0.451295	0.14334	0	0.257502
Golgb1	ENSMUSG00000034243	0.196364	0.284887	0	0.304874
1700025G04Rik	ENSMUSG00000032666	0.430358	0.299165	0	-0.395555
Ms4a4d	ENSMUSG00000024678	0.304645	0.307842	0	-0.145795
Gosr2	ENSMUSG00000020946	0.370076	0.421361	0	0.144448
Csgalnact1	ENSMUSG00000036356	0.148573	0.358119	0	0.223969
Gzmk	ENSMUSG00000042385	0.294215	0.423872	0	-0.302612
Epb41	ENSMUSG00000028906	0.686237	0.113217	0	-0.38977
Traf3ip2	ENSMUSG00000019842	0.357358	0.452866	0	0.0324426
Nod2	ENSMUSG00000055994	0.359779	0.393934	0	0.427551
Zfp318	ENSMUSG00000015597	0.332931	0.449592	0	-0.463171
Src	ENSMUSG00000027646	0.337274	0.371872	0	-0.0475598
Ppp1cb	ENSMUSG00000014956	0.367248	0.449592	0	-0.182821
S100a4	ENSMUSG00000001020	0.292308	0.289264	0	0.124049
Mrps28	ENSMUSG00000040269	0.440256	0.242533	0	-0.0749398
Smco4	ENSMUSG00000058173	0.385437	0.323449	0	-0.463905
Vps16	ENSMUSG00000027411	0.339976	0.427331	0	-0.0339628
Idnk	ENSMUSG00000050002	0.294992	0.421361	0	-0.0187963
Irf4	ENSMUSG00000021356	0.626829	0.163593	0	-0.462651
Nfia	ENSMUSG00000028565	0.543337	0.0880362	0	0.0953537
Cyb5r4	ENSMUSG00000032872	0.193354	0.568088	0	-0.00680835
Setbp1	ENSMUSG00000024548	0.514896	0.142413	0	0.256218
Helz	ENSMUSG00000020721	0.472343	0.321194	0	-0.163216
Htt	ENSMUSG00000029104	0.293338	0.435931	0	0.0842388
Gapvd1	ENSMUSG00000026867	0.289353	0.444663	0	-0.0479899
Zbtb8a	ENSMUSG00000028807	0.453081	0.296442	0	0.076355
Slc27a1	ENSMUSG00000031808	0.288526	0.427331	0	0.35542
Mitf	ENSMUSG00000035158	0.22248	0.479393	0	0.0175103
Krr1	ENSMUSG00000063334	0.361658	0.421361	0	-0.0906626
Plxnc1	ENSMUSG00000074785	0.387019	0.241119	0	0.169677
Patj	ENSMUSG00000061859	0.331969	0.264408	0	-0.183252
Ggnbp1	ENSMUSG00000048731	0.540188	0.235215	0	-0.0114743
Igf1r	ENSMUSG00000005533	0.453792	0.271859	0	-0.649628
Sphk2	ENSMUSG00000057342	0.365313	0.424801	0	-0.0481183
1700010I14Rik	ENSMUSG00000023873	0.329596	0.327391	0	0.32958
Psmb7	ENSMUSG00000026750	0.289276	0.290621	0	0.0708195
Bptf	ENSMUSG00000040481	0.514272	0.160597	0	-0.0593048
Dnah17	ENSMUSG00000033987	0.440402	0.293454	0	-0.24805
Ikbkb	ENSMUSG00000031537	0.283415	0.481791	0	-0.0117308
Cwf19l2	ENSMUSG00000025898	0.287186	0.49059	0	-0.078887
Rpp25l	ENSMUSG00000036114	0.351917	0.41797	0	0.0226523
Il2ra	ENSMUSG00000026770	0.620992	0.0928823	0	-0.105123
Rpa1	ENSMUSG00000000751	0.477282	0.284887	0	0.0298124
Atp1b3	ENSMUSG00000032412	0.539898	0.21068	0	-0.322809
2310001H17Rik	ENSMUSG00000097354	0.50957	0.255398	0	-0.127259
Trmt12	ENSMUSG00000037085	0.296878	0.467105	0	0.225967
Cpq	ENSMUSG00000039007	0.427526	0.16992	0	0.329086
Sp2	ENSMUSG00000018678	0.477028	0.2832	0	-0.0936887
Srl	ENSMUSG00000022519	0.223883	0.330687	0	0.865012
Fam222a	ENSMUSG00000041930	0.316525	0.452866	0	-0.631319
Kmt2a	ENSMUSG00000002028	0.513108	0.191268	0	0.0494757
Cib1	ENSMUSG00000030538	0.330434	0.438676	0	-0.0619282
Naca	ENSMUSG00000061315	0.481174	0.289264	0	-0.0725123
Rpl38	ENSMUSG00000057322	0.293338	0.449592	0	-0.324624
Tmem123	ENSMUSG00000050912	0.387193	0.236968	0	-0.0529482
Tnrc6a	ENSMUSG00000052707	0.18775	0.428646	0	-0.0938819
Csf2ra	ENSMUSG00000059326	0.288162	0.476417	0	0.328522
Vps8	ENSMUSG00000033653	0.420832	0.153282	0	0.204411
Jazf1	ENSMUSG00000063568	0.223617	0.34839	0	0.335637
Coro1c	ENSMUSG00000004530	0.58587	0.189224	0	-0.0212287
Cmtm6	ENSMUSG00000032434	0.522343	0.235215	0	-0.118578
Gcat	ENSMUSG00000006378	0.550375	0.230882	0	0.0480696
Tiam1	ENSMUSG00000002489	0.506815	0.188282	0	0.085418
Lcp2	ENSMUSG00000002699	0.51893	0.191546	0	0.151819
H2afv	ENSMUSG00000041126	0.345368	0.444663	0	-0.21227
Cdipt	ENSMUSG00000030682	0.320114	0.442149	0	-0.0969718
Uhrf1bp1l	ENSMUSG00000019951	0.538015	0.179837	0	0.0359066
Itgb2	ENSMUSG00000000290	0.542862	0.159621	0	0.120908
Mnt	ENSMUSG00000000282	0.407375	0.310941	0	-0.222225
Trim2	ENSMUSG00000027993	0.463529	0.274733	0	-0.00524624
Nhsl1	ENSMUSG00000039835	0.151821	0.571743	0	0.276676
Klf7	ENSMUSG00000025959	0.397356	0.242244	0	-0.465031
Atp6v0d2	ENSMUSG00000028238	0.300896	0.2832	0	1.46423
Rfc3	ENSMUSG00000033970	0.296481	0.48629	0	0.108444
Camk1d	ENSMUSG00000039145	0.510954	0.202615	0	-0.263907
Stx11	ENSMUSG00000039232	0.523249	0.184705	0	-0.235358
Hdac4	ENSMUSG00000026313	0.508513	0.227853	0	-0.358562
Ubxn7	ENSMUSG00000053774	0.232097	0.293454	0	-0.0104911
Sh3bp5	ENSMUSG00000021892	0.554571	0.205879	0	-0.215995
Gm16201	ENSMUSG00000086742	0.339245	0.349691	0	-0.149577
Fgd6	ENSMUSG00000020021	0.205019	0.301911	0	0.480331
Mid1	ENSMUSG00000035299	0.141699	0.379453	0	0.481214
Klhl25	ENSMUSG00000055652	0.518696	0.225962	0	-0.0317542
Tbc1d16	ENSMUSG00000039976	0.535305	0.216738	0	-0.0479929
Slc12a8	ENSMUSG00000035506	0.35687	0.229923	0	0.360841
Prpsap1	ENSMUSG00000015869	0.312027	0.435931	0	0.0249939
Nsmce2	ENSMUSG00000059586	0.571303	0.097008	0	0.0696315
Sh3kbp1	ENSMUSG00000040990	0.403464	0.324271	0	-0.143562
Hivep3	ENSMUSG00000028634	0.351147	0.261747	0	0.348796
Cpm	ENSMUSG00000020183	0.538931	0.14531	0	-0.425517
Rab8b	ENSMUSG00000036943	0.39859	0.293526	0	-0.104172
Pdlim5	ENSMUSG00000028273	0.540622	0.122296	0	-0.144625
Slc35c2	ENSMUSG00000017664	0.413081	0.308769	0	0.208748
Stard3nl	ENSMUSG00000003062	0.29201	0.332672	0	-0.11612
Tram2	ENSMUSG00000041779	0.295191	0.475193	0	0.234066
Vmp1	ENSMUSG00000018171	0.709047	0.0723738	0	0.00869875
Psd4	ENSMUSG00000026979	0.505028	0.237489	0	0.0775417
Tigit	ENSMUSG00000071552	0.293134	0.312914	0	-0.211556
Trp53inp1	ENSMUSG00000028211	0.164382	0.458572	0	-0.548298
Dock10	ENSMUSG00000038608	0.471292	0.246738	0	0.11217
Acvr1b	ENSMUSG00000000532	0.322859	0.381371	0	-0.0861419
Polr3b	ENSMUSG00000034453	0.131003	0.540105	0	-0.0938664
Arhgap10	ENSMUSG00000037148	0.407241	0.304318	0	-0.181953
Mt2	ENSMUSG00000031762	0.300533	0.41797	0	0.20093
Myo1c	ENSMUSG00000017774	0.430082	0.323818	0	0.243723
Rps19bp1	ENSMUSG00000051518	0.41168	0.293454	0	-0.0835025
Ankrd33b	ENSMUSG00000022237	0.29932	0.31878	0	0.85052
Lias	ENSMUSG00000029199	0.327506	0.442149	0	0.00779688
Kif1bp	ENSMUSG00000036955	0.446752	0.315345	0	0.172958
Cytip	ENSMUSG00000026832	0.600904	0.121349	0	-0.571452
Akt2	ENSMUSG00000004056	0.319121	0.427331	0	-0.232725
Tnfrsf1a	ENSMUSG00000030341	0.401135	0.240185	0	-0.0123945
Ccr9	ENSMUSG00000029530	0.378467	0.372566	0	0.369193
Palm	ENSMUSG00000035863	0.300615	0.475193	0	-0.259094
Dock8	ENSMUSG00000052085	0.563402	0.195599	0	0.0314249
Klc2	ENSMUSG00000024862	0.28793	0.478864	0	-0.0281258
Atp8a2	ENSMUSG00000021983	0.436113	0.150955	0	0.205865
Eml1	ENSMUSG00000058070	0.392526	0.222332	0	0.0783491
Lck	ENSMUSG00000000409	0.53798	0.214323	0	-0.0252934
Ssbp2	ENSMUSG00000003992	0.48345	0.121372	0	-0.00314711
Anxa3	ENSMUSG00000029484	0.313377	0.321194	0	0.383658
Lrrc27	ENSMUSG00000015980	0.146363	0.452866	0	0.226525
Paxip1	ENSMUSG00000002221	0.400184	0.232569	0	-0.0346257
Nr4a2	ENSMUSG00000026826	0.606598	0.120389	0	-0.38147
Gm15518	ENSMUSG00000087066	0.665789	0.0973506	0	0.295591
Vps45	ENSMUSG00000015747	0.523415	0.194992	0	-0.0141916
Slc25a26	ENSMUSG00000045100	0.295191	0.465749	0	-0.0395836
Tgfbr2	ENSMUSG00000032440	0.522615	0.2086	0	-0.340486
Atn1	ENSMUSG00000004263	0.485289	0.247552	0	-0.304922
Kcnq5	ENSMUSG00000028033	0.302969	0.202887	0	0.342844
Kif5c	ENSMUSG00000026764	0.541454	0.103165	0	0.0446539
[truncated: 8,091 more rows]

## Sheet: HDM_UPreg
Gene Symbol	ENSEMBL ID	ChIP-seq c-Maf Score	Motif c-Maf Score	-log10 (BETA score)	-log2 (FC RNA-seq)
Muc4	ENSMUSG00000079620	0.974597	0.992359	0	1.58096
Prnp	ENSMUSG00000079037	0.895776	0.973506	0.977984	0.764362
Npas4	ENSMUSG00000045903	0.977541	0.973506	2.00178	0.991019
Ifi206	ENSMUSG00000037849	0.818543	0.880363	0	0.944063
Phf11a	ENSMUSG00000044703	0.795488	0.905732	0	0.603808
Lrrc49	ENSMUSG00000047766	0.832865	0.959911	1.84315	0.925324
Slc39a4	ENSMUSG00000063354	0.908874	0.905732	2.69443	0.631748
Gstp3	ENSMUSG00000058216	0.645652	0.92904	0	0.870468
Galnt3	ENSMUSG00000026994	0.661767	0.928515	0	0.728021
Spint1	ENSMUSG00000027315	0.799954	0.842722	0	1.28279
1700057H21Rik	ENSMUSG00000086007	0.691926	0.905732	0	2.25744
Spin4	ENSMUSG00000071722	0.623028	0.905732	0	1.19804
1700066B19Rik	ENSMUSG00000073598	0.859205	0.661352	0	0.820259
Gldc	ENSMUSG00000024827	0.756822	0.616457	0	1.33521
Kdelc2	ENSMUSG00000034487	0.574869	0.931499	0	0.735722
Ccr8	ENSMUSG00000042262	0.778272	0.421361	1.90448	0.65022
Chsy1	ENSMUSG00000032640	0.807479	0.46904	2.94462	1.09444
Socs5	ENSMUSG00000037104	0.586467	0.592884	0.916139	0.717768
Fbxo40	ENSMUSG00000047746	0.85109	0.474978	0	1.36141
Tnf	ENSMUSG00000024401	0.86184	0.41797	2.93144	0.623198
Adgrd1	ENSMUSG00000044017	0.689776	0.473936	0	1.27316
Gm10863	ENSMUSG00000075555	0.811167	0.46904	0	0.727209
Gimap7	ENSMUSG00000043931	0.86953	0.480369	3.28441	0.694404
C3	ENSMUSG00000024164	0.397744	0.888797	0	1.89139
Lamc2	ENSMUSG00000026479	0.759071	0.292451	0	1.97153
Antxr1	ENSMUSG00000033420	0.776354	0.476417	0	1.41733
Capsl	ENSMUSG00000039676	0.635456	0.662364	0	1.02574
Slc13a3	ENSMUSG00000018459	0.784551	0.314303	0	1.87198
Lamc1	ENSMUSG00000026478	0.685613	0.269587	1.95624	0.829115
Adcy4	ENSMUSG00000022220	0.437271	0.484801	2.04925	1.17653
Wdr35	ENSMUSG00000066643	0.486984	0.471455	0	0.773011
Col27a1	ENSMUSG00000045672	0.570668	0.315373	0	0.6343
Bcas1	ENSMUSG00000013523	0.430821	0.451146	0	1.30261
Ggt7	ENSMUSG00000027603	0.497999	0.586489	0	0.766333
Sh3tc1	ENSMUSG00000036553	0.320709	0.595365	0	0.882933
Bco2	ENSMUSG00000032066	0.5451	0.2832	0	2.1274
Ltbp4	ENSMUSG00000040488	0.295908	0.719558	1.17483	1.11884
Hip1	ENSMUSG00000039959	0.417739	0.484603	0	0.672778
Kcnc3	ENSMUSG00000062785	0.480055	0.481791	1.9859	2.65506
Gm10044	ENSMUSG00000072723	0.294899	0.642256	0	0.792345
Cdh17	ENSMUSG00000028217	0.303101	0.301911	0	2.25318
Itih5	ENSMUSG00000025780	0.428571	0.442149	1.39158	0.9771
Igfbp5	ENSMUSG00000026185	0.412116	0.433897	0	2.47842
Hc	ENSMUSG00000026874	0.75583	0.197718	0	1.76574
5330417C22Rik	ENSMUSG00000040412	0.339976	0.424801	0	1.43996
2210417A02Rik	ENSMUSG00000086494	0.583987	0.294766	1.46268	1.14268
Frmd4a	ENSMUSG00000026657	0.411306	0.447615	0	0.965243
Cysltr2	ENSMUSG00000033470	0.379866	0.427331	0	0.740583
Crispld2	ENSMUSG00000031825	0.439404	0.476036	0	1.20783
Haspin	ENSMUSG00000050107	0.481428	0.496874	0	1.17643
Pak4	ENSMUSG00000030602	0.256563	0.640459	0	0.629071
Nlrp1b	ENSMUSG00000070390	0.43603	0.444663	1.2008	1.04521
Vipr2	ENSMUSG00000011171	0.658858	0.244799	0	0.694611
Prr5l	ENSMUSG00000032841	0.623932	0.284634	2.44855	0.660042
Gbp7	ENSMUSG00000040253	0.58714	0.290621	2.30865	0.605955
Cttn	ENSMUSG00000031078	0.48532	0.328008	0	1.10986
Bmpr2	ENSMUSG00000067336	0.274623	0.586798	0.952336	0.733739
Zpbp2	ENSMUSG00000017195	0.465782	0.451923	1.31256	0.589152
Slc15a3	ENSMUSG00000024737	0.618838	0.318107	2.35115	0.683525
Wwox	ENSMUSG00000004637	0.446241	0.164152	1.52216	1.05357
Cd52	ENSMUSG00000000682	0.552167	0.293454	1.67203	0.72736
Tacc2	ENSMUSG00000030852	0.479994	0.296442	0	1.09486
Zbtb32	ENSMUSG00000006310	0.579598	0.284887	1.57381	0.822588
Ptgfrn	ENSMUSG00000027864	0.491566	0.231576	0	0.955854
Tg	ENSMUSG00000053469	0.546056	0.281249	0	0.860063
2310015A10Rik	ENSMUSG00000097729	0.3605	0.465749	0	0.762773
Ispd	ENSMUSG00000043153	0.462651	0.312694	0	1.27443
Cd101	ENSMUSG00000086564	0.421328	0.337624	2.77469	0.932418
Alcam	ENSMUSG00000022636	0.323646	0.371138	0	0.939387
Mbnl1	ENSMUSG00000027763	0.317284	0.205642	2.83594	0.724515
Padi2	ENSMUSG00000028927	0.462739	0.208985	0	0.94301
Itgae	ENSMUSG00000005947	0.573658	0.198862	0	2.091
Asph	ENSMUSG00000028207	0.385431	0.229923	0	0.834243
Me1	ENSMUSG00000032418	0.287307	0.321067	0	1.18952
Bace2	ENSMUSG00000040605	0.273333	0.301911	0	1.01135
Chst11	ENSMUSG00000034612	0.34124	0.260387	0	0.853128
Impa2	ENSMUSG00000024525	0.376597	0.14531	0	0.59546
Mical3	ENSMUSG00000051586	0.335017	0.206606	0	0.677299
Lrrk1	ENSMUSG00000015133	0.267985	0.373622	1.32892	1.30593
Gpld1	ENSMUSG00000021340	0.402524	0.216948	0	0.719744
Ccdc80	ENSMUSG00000022665	0.386854	0.234115	0	1.80965
Col15a1	ENSMUSG00000028339	0.402757	0.250118	0	0.720415
Gipc3	ENSMUSG00000034872	0.337231	0.435931	0	0.859534
Lysmd2	ENSMUSG00000032184	0.199826	0.318107	0	0.734978
Ccl1	ENSMUSG00000020702	0.184695	0.305862	0	3.08884
Trpm1	ENSMUSG00000030523	0.179493	0.36873	0	0.835761
Arhgap39	ENSMUSG00000033697	0.565578	0.103364	0	0.970042
Tns2	ENSMUSG00000037003	0.411744	0.248975	0	0.80059
Adap1	ENSMUSG00000056413	0.324281	0.220607	0	0.656306
Alpk2	ENSMUSG00000032845	0.574454	0.0734984	2.07263	0.859646
Rnf43	ENSMUSG00000034177	0.373637	0.311597	0	0.969798
Dst	ENSMUSG00000026131	0.231149	0.218613	0	0.998654
Pparg	ENSMUSG00000000440	0.272754	0.16219	0	0.749138
Dhx58	ENSMUSG00000017830	0.395131	0.284887	0	0.714788
Lclat1	ENSMUSG00000054469	0.309039	0.212105	0	0.925484
St8sia6	ENSMUSG00000003418	0.354836	0.21068	0	0.714263
A430093F15Rik	ENSMUSG00000067577	0.51969	0.124571	3.56735	0.820133
Cd80	ENSMUSG00000075122	0.389715	0.225573	0	1.04507
Phldb1	ENSMUSG00000048537	0.46869	0.182522	0	0.658768
Ralgds	ENSMUSG00000026821	0.349364	0.203251	0	0.62783
Pou2f2	ENSMUSG00000008496	0.351221	0.252067	2.04191	0.664149
Cfap54	ENSMUSG00000020014	0.398359	0.0973506	0	0.90744
Gm11454	ENSMUSG00000086152	0.210418	0.262329	0	1.42287
Myo1e	ENSMUSG00000032220	0.0721314	0.246626	0	0.812889
Soga1	ENSMUSG00000055485	0.253343	0.330367	0	1.0116
Neu3	ENSMUSG00000035239	0.280541	0.186842	0	0.757274
Dscaml1	ENSMUSG00000032087	0.137344	0.166231	0	3.99906
Sulf1	ENSMUSG00000016918	0.218338	0.31878	0	1.50209
Ccdc40	ENSMUSG00000039963	0.407105	0.160597	1.75548	0.697326
Axl	ENSMUSG00000002602	0.254722	0.1416	0	1.57849
Rbm47	ENSMUSG00000070780	0.23686	0.24073	0	0.945523
Pdcd1lg2	ENSMUSG00000016498	0.274088	0.10534	0	0.849881
Dock4	ENSMUSG00000035954	0.258294	0.301911	0	1.32831
Hvcn1	ENSMUSG00000064267	0.423602	0.116437	0	0.638598
Ctif	ENSMUSG00000052928	0.372893	0.102081	0	0.696893
Ubxn11	ENSMUSG00000012126	0.266431	0.174372	0	1.02976
Rgs3	ENSMUSG00000059810	0.253053	0.167555	0	0.731401
Nol4l	ENSMUSG00000061411	0.240276	0.112787	0	0.81288
Tnfsf10	ENSMUSG00000039304	0.145829	0.162251	1.87128	0.688995
Ica1	ENSMUSG00000062995	0.35993	0.0824348	0	1.03531
Ksr2	ENSMUSG00000061578	0.0794289	0.120448	0	0.815579
Cacna1a	ENSMUSG00000034656	0.160335	0.176072	0	0.617296
Ptpn3	ENSMUSG00000038764	0.220347	0.108983	2.52129	0.640918
2900026A02Rik	ENSMUSG00000051339	0.123752	0.193715	0	1.29953
Gsap	ENSMUSG00000039934	0.116118	0.181146	0	0.688415
Wwc2	ENSMUSG00000031563	0.0951845	0.121372	0	0.893793
Arhgef17	ENSMUSG00000032875	0.146669	0.222332	0	1.28182
Nrp1	ENSMUSG00000025810	0.0678217	0.169207	0	0.627064
Wdr78	ENSMUSG00000035126	0.913571	0	1.54424	0.713251
Cald1	ENSMUSG00000029761	0.773923	0	0	1.16267
Apol9a	ENSMUSG00000057346	0.831906	0	0	1.59834
Pik3r3	ENSMUSG00000028698	0.911091	0	0.950782	0.748467
Kcnj15	ENSMUSG00000062609	0.940462	0	0	1.19078
Sostdc1	ENSMUSG00000036169	0.850825	0	0	1.79765
Atp1a2	ENSMUSG00000007097	0.785896	0	0	1.3073
Apol9b	ENSMUSG00000068246	0.89313	0	0	1.54119
Gem	ENSMUSG00000028214	0.845136	0	1.74909	0.733044
Tgm7	ENSMUSG00000079103	0.705686	0	0	1.19581
Lta	ENSMUSG00000024402	0.923395	0	0	0.638514
Rgs16	ENSMUSG00000026475	0.726557	0	0	1.05018
Fam124b	ENSMUSG00000043230	0.784739	0	1.84588	1.14843
Gca	ENSMUSG00000026893	0.808884	0	0	1.46348
Pls3	ENSMUSG00000016382	0.673072	0	0	0.632749
Pex16	ENSMUSG00000027222	0.840671	0	1.27893	0.677413
Trbv12-1	ENSMUSG00000095574	0.960804	0	0	0.904085
Lmln	ENSMUSG00000022802	0.872937	0	1.28743	0.812693
Prrg2	ENSMUSG00000007837	0.967552	0	0	0.59756
Cep290	ENSMUSG00000019971	0.90173	0	0	1.01062
Slc1a4	ENSMUSG00000020142	0.848113	0	0.93442	0.676573
Pipox	ENSMUSG00000017453	0.88195	0	0	0.680397
4931406C07Rik	ENSMUSG00000031938	0.80733	0	1.18755	0.895593
Krt83	ENSMUSG00000067613	0.732775	0	0	0.944474
Vcl	ENSMUSG00000021823	0.825004	0	0	0.615057
Ifi209	ENSMUSG00000043263	0.906857	0	0	0.752998
Tm4sf5	ENSMUSG00000018919	0.813499	0	0	1.23655
Vcam1	ENSMUSG00000027962	0.662356	0	0	0.990564
Cd38	ENSMUSG00000029084	0.73132	0	0	0.606247
Atp10b	ENSMUSG00000055415	0.678133	0	0	4.34959
Apol7e	ENSMUSG00000071716	0.732147	0	0	0.800363
Cmpk2	ENSMUSG00000020638	0.783812	0	1.32855	0.606602
Grik5	ENSMUSG00000003378	0.571561	0	0	0.613067
Angptl4	ENSMUSG00000002289	0.774617	0	1.26424	0.788282
5730409E04Rik	ENSMUSG00000073755	0.766017	0	0	0.712143
Ppfibp1	ENSMUSG00000016487	0.653111	0	0	0.722863
Xaf1	ENSMUSG00000040483	0.7854	0	1.21638	0.627833
Ceacam16	ENSMUSG00000014686	0.595343	0	0	1.0866
Ebi3	ENSMUSG00000003206	0.568518	0	0	0.905579
Chst15	ENSMUSG00000030930	0.611683	0	0	1.40098
Serpine2	ENSMUSG00000026249	0.75573	0	0	1.38984
Slfn8	ENSMUSG00000035208	0.705421	0	0	0.616427
Snai3	ENSMUSG00000006587	0.771706	0	0	0.863953
Ildr1	ENSMUSG00000022900	0.644638	0	0	0.683251
Gm9821	ENSMUSG00000095332	0.655013	0	0	0.727382
Isg20	ENSMUSG00000039236	0.61504	0	0	0.721884
Tesk1	ENSMUSG00000028458	0.64896	0	0	0.73113
Fam81a	ENSMUSG00000032224	0.590944	0	0	0.947752
Rbm43	ENSMUSG00000036249	0.614527	0	0	0.589083
P4ha3	ENSMUSG00000051048	0.627956	0	0	2.09322
Tnfrsf13c	ENSMUSG00000068105	0.736414	0	0	1.03836
Lsr	ENSMUSG00000001247	0.671187	0	0	1.24623
Fdx1	ENSMUSG00000032051	0.622598	0	0	0.649397
Bicd1	ENSMUSG00000003452	0.613568	0	0	1.07746
Adamts6	ENSMUSG00000046169	0.563317	0	1.68131	0.60994
Gm11532	ENSMUSG00000087067	0.638243	0	0	1.25067
Nat8f4	ENSMUSG00000068299	0.640624	0	0	0.827033
Crybg2	ENSMUSG00000012123	0.684318	0	0	0.73881
Coch	ENSMUSG00000020953	0.71594	0	0	3.80839
Srgap3	ENSMUSG00000030257	0.359127	0	0	0.733322
Sall2	ENSMUSG00000049532	0.68541	0	0	0.697269
Gjb2	ENSMUSG00000046352	0.624053	0	0	1.22901
Nsun7	ENSMUSG00000029206	0.580161	0	0	1.40184
Plcb3	ENSMUSG00000024960	0.611616	0	0	0.658813
Tnfsf13b	ENSMUSG00000031497	0.463963	0	1.16717	0.972615
Emilin1	ENSMUSG00000029163	0.568319	0	0	0.603278
E330020D12Rik	ENSMUSG00000073538	0.415506	0	0	1.06127
Lgals7	ENSMUSG00000053522	0.611385	0	0	1.62295
Sdc1	ENSMUSG00000020592	0.624301	0	0	0.665881
Fer1l6	ENSMUSG00000037106	0.485496	0	0	2.0911
Usp18	ENSMUSG00000030107	0.41286	0	0	0.61369
Pex11a	ENSMUSG00000030545	0.583601	0	0	1.13074
Pdgfb	ENSMUSG00000000489	0.577052	0	0	0.830827
Slc30a2	ENSMUSG00000028836	0.37034	0	0	1.86548
Swap70	ENSMUSG00000031015	0.406022	0	0	0.603022
Kif9	ENSMUSG00000032489	0.568386	0	0	0.839407
Plekha4	ENSMUSG00000040428	0.427546	0	0	1.29743
Vash1	ENSMUSG00000021256	0.382893	0	0	1.82111
Akap7	ENSMUSG00000039166	0.376302	0	0	0.954172
Slc6a9	ENSMUSG00000028542	0.47726	0	0.851397	0.93523
Filip1	ENSMUSG00000034898	0.121688	0	0	1.72904
Stc2	ENSMUSG00000020303	0.345963	0	0	1.43578
Cybb	ENSMUSG00000015340	0.312451	0	0	2.20618
Zcchc24	ENSMUSG00000055538	0.3755	0	0	0.692022
Cyb561	ENSMUSG00000019590	0.308157	0	0	1.10108
Nbl1	ENSMUSG00000041120	0.421708	0	0	1.21413
Zbtb46	ENSMUSG00000027583	0.413811	0	0	0.648169
Tnxb	ENSMUSG00000033327	0.471008	0	0	1.52011
Egr3	ENSMUSG00000033730	0.372821	0	0	0.852622
Fut7	ENSMUSG00000036587	0.463169	0	1.55658	0.900368
Cacna1s	ENSMUSG00000026407	0.304221	0	0	0.830327
Izumo1r	ENSMUSG00000031933	0.399315	0	2.03617	0.662766
Dram1	ENSMUSG00000020057	0.342771	0	0	1.3957
2005-09-01	ENSMUSG00000072214	0.328763	0	0	0.985879
Nrgn	ENSMUSG00000053310	0.340605	0	0	1.49281
Slc9b2	ENSMUSG00000037994	0.343234	0	0	0.625636
Endod1	ENSMUSG00000037419	0.334998	0	0	0.815256
Fzd7	ENSMUSG00000041075	0.310009	0	0	1.35487
Amdhd1	ENSMUSG00000015890	0.284259	0	0	1.45845
Mettl24	ENSMUSG00000045555	0.329728	0	0	1.14113
Slc4a5	ENSMUSG00000068323	0.351603	0	0	1.01674
Adcy9	ENSMUSG00000005580	0.285747	0	0	0.60018
Igfbp7	ENSMUSG00000036256	0.331199	0	0	0.99303
Akap6	ENSMUSG00000061603	0.196633	0	0	1.22207
Pde4a	ENSMUSG00000032177	0.305025	0	0	1.19111
Megf8	ENSMUSG00000045039	0.438858	0	1.25665	1.16554
Usp20	ENSMUSG00000026854	0.343234	0	0	0.617592
Rnd3	ENSMUSG00000017144	0.246375	0	0	1.33603
Suox	ENSMUSG00000049858	0.297109	0	0	0.652214
Susd2	ENSMUSG00000006342	0.206199	0	0	1.68881
Kifc3	ENSMUSG00000031788	0.331732	0	0	2.00632
Ttn	ENSMUSG00000051747	0.30395	0	0	0.689849
Gpm6b	ENSMUSG00000031342	0.324329	0	0	1.7117
Pik3ap1	ENSMUSG00000025017	0.229145	0	0	1.50592
Tjp2	ENSMUSG00000024812	0.218194	0	0	0.655981
Slc52a3	ENSMUSG00000027463	0.300086	0	0	0.633927
Carmil1	ENSMUSG00000021338	0.327391	0	0	1.23614
Ikzf4	ENSMUSG00000002578	0.356225	0	0	0.677265
Ifih1	ENSMUSG00000026896	0.361658	0	0	0.666678
2610301B20Rik	ENSMUSG00000059482	0.287545	0	1.6925	0.662958
Insl6	ENSMUSG00000050957	0.385291	0	0	0.973961
Sphk1	ENSMUSG00000061878	0.355125	0	0	1.02924
Nos1	ENSMUSG00000029361	0.12151	0	0	2.65813
Gtf2ird1	ENSMUSG00000023079	0.317335	0	0	1.06978
Igsf3	ENSMUSG00000042035	0.292396	0	0	0.854318
Cst7	ENSMUSG00000068129	0.35797	0	0	0.656063
Prag1	ENSMUSG00000050271	0.305907	0	0	0.659075
Calhm2	ENSMUSG00000033033	0.327506	0	0	0.605369
Myo5c	ENSMUSG00000033590	0.361104	0	0	1.77341
Ints4	ENSMUSG00000025133	0.229661	0	0	0.724009
Nrarp	ENSMUSG00000078202	0.3691	0	0	0.635798
Chdh	ENSMUSG00000015970	0.21643	0	0	1.06497
Irak1bp1	ENSMUSG00000032251	0.300615	0	0	0.615569
Stk32c	ENSMUSG00000015981	0.166253	0	0	0.786289
Gnb5	ENSMUSG00000032192	0.312027	0	0	0.612404
Ehd2	ENSMUSG00000074364	0.190201	0	0	1.36203
Smpdl3b	ENSMUSG00000028885	0.248966	0	0	1.29201
Col6a5	ENSMUSG00000091345	0.290918	0	0	2.64199
Dand5	ENSMUSG00000053226	0.366164	0	0	0.708517
Ppp4r4	ENSMUSG00000021209	0.223564	0	0	0.948983
Mcf2l	ENSMUSG00000031442	0.198448	0	0	0.840142
Reep2	ENSMUSG00000038555	0.316525	0	0	0.819405
Nfe2	ENSMUSG00000058794	0.321701	0	0	1.98469
She	ENSMUSG00000046280	0.345583	0	0	0.613998
Optn	ENSMUSG00000026672	0.143965	0	0	0.63881
Mx1	ENSMUSG00000000386	0.219107	0	0.955852	0.585864
Bcl2l15	ENSMUSG00000044165	0.237897	0	0	0.874305
Celf5	ENSMUSG00000034818	0.276579	0	1.09232	0.603181
Mamdc2	ENSMUSG00000033207	0.257081	0	0	1.49782
F3	ENSMUSG00000028128	0.224677	0	0	1.75386
Litaf	ENSMUSG00000022500	0.188628	0	0	0.754993
Lamb3	ENSMUSG00000026639	0.28068	0	0	0.720564
Fhdc1	ENSMUSG00000041842	0.255582	0	0	1.64108
Car5b	ENSMUSG00000031373	0.233139	0	0	1.67123
P3h3	ENSMUSG00000023191	0.203277	0	0	0.985007
Rbpms	ENSMUSG00000031586	0.136076	0	1.09936	1.54324
Olfm2	ENSMUSG00000032172	0.236662	0	0	1.43603
Ckb	ENSMUSG00000001270	0.20148	0	0	0.647903
Gsn	ENSMUSG00000026879	0.114497	0	0	1.30882
Cc2d2a	ENSMUSG00000039765	0	0.854662	0	2.32384
Igflr1	ENSMUSG00000036826	0	0.854662	0	0.875805
Dync2li1	ENSMUSG00000024253	0	0.940314	0	0.91205
Ogfrl1	ENSMUSG00000026158	0	0.835941	0	0.621693
Btbd17	ENSMUSG00000000202	0	0.849601	0	1.80938
Gpam	ENSMUSG00000024978	0	0.939735	0	0.617686
6330403K07Rik	ENSMUSG00000018451	0	0.957728	0	0.967961
Mapk8ip1	ENSMUSG00000027223	0	0.962028	0	1.06569
Jcad	ENSMUSG00000033960	0	0.889326	0	0.86426
Gm10501	ENSMUSG00000073415	0	0.963583	0	0.938429
Slc30a3	ENSMUSG00000029151	0	0.854662	0	1.60355
Colq	ENSMUSG00000057606	0	0.608276	0	0.797134
Tcaf1	ENSMUSG00000036667	0	0.488506	0	2.48982
Tmprss3	ENSMUSG00000024034	0	0.488506	0	1.39122
Amph	ENSMUSG00000021314	0	0.328901	0	2.05786
Cep112	ENSMUSG00000020728	0	0.427331	0	1.88928
Hdac11	ENSMUSG00000034245	0	0.442149	0	0.718257
Mcoln3	ENSMUSG00000036853	0	0.41797	0	1.14204
Fblim1	ENSMUSG00000006219	0	0.444663	0	1.2205
Tff1	ENSMUSG00000024032	0	0.41797	0	1.4292
Mme	ENSMUSG00000027820	0	0.421361	0	1.83946
Chst3	ENSMUSG00000057337	0	0.444663	0	0.754645
Chmp4c	ENSMUSG00000027536	0	0.427331	0	0.763888
Gstt1	ENSMUSG00000001663	0	0.41797	0	1.5272
1810011H11Rik	ENSMUSG00000041707	0	0.324326	0	1.56724
Efemp2	ENSMUSG00000024909	0	0.467105	0	0.686976
Bspry	ENSMUSG00000028392	0	0.44654	0	0.637783
Dpysl3	ENSMUSG00000024501	0	0.2832	0	1.61601
Gpc3	ENSMUSG00000055653	0	0.296442	0	2.01816
Capn5	ENSMUSG00000035547	0	0.220091	0	1.10367
Fscn1	ENSMUSG00000029581	0	0.427331	0	1.35565
Cib2	ENSMUSG00000037493	0	0.328449	0	2.38553
St14	ENSMUSG00000031995	0	0.300764	0	1.03101
Fgd1	ENSMUSG00000025265	0	0.287837	0	0.648561
Chia1	ENSMUSG00000062778	0	0.293454	0	2.08101
Etl4	ENSMUSG00000036617	0	0.245169	0	1.49077
Ppp2r2c	ENSMUSG00000029120	0	0.301911	0	1.03424
Ulk4	ENSMUSG00000040936	0	0.334376	0	1.14113
Rai14	ENSMUSG00000022246	0	0.185261	0	0.824115
Tiam2	ENSMUSG00000023800	0	0.213666	0	0.976145
C77080	ENSMUSG00000050390	0	0.320533	0	1.01368
Sox13	ENSMUSG00000070643	0	0.235215	0	1.89221
Enpep	ENSMUSG00000028024	0	0.235728	0	1.62284
Pbx1	ENSMUSG00000052534	0	0.242533	0	1.28671
Large1	ENSMUSG00000004383	0	0.170932	0	0.703159
Limch1	ENSMUSG00000037736	0	0.164302	0	1.4617
Unc79	ENSMUSG00000021198	0	0.190864	0	1.25396
Nrn1	ENSMUSG00000039114	0	0.213666	0	1.85067
Cdh1	ENSMUSG00000000303	0	0.148221	0	0.989598
Prkcg	ENSMUSG00000078816	0	0.170932	0	0.836763
Dmd	ENSMUSG00000045103	0	0.209833	0	0.813525
C530008M17Rik	ENSMUSG00000036377	0	0.17686	0	1.22969
2010300C02Rik	ENSMUSG00000026090	0	0.189224	0	1.70275
Grb10	ENSMUSG00000020176	0	0.168544	0	2.42987
Mylk	ENSMUSG00000022836	0	0.222332	0	1.28389
Dscam	ENSMUSG00000050272	0	0.101631	0	1.16873
Cobl	ENSMUSG00000020173	0	0.162251	0	1.61138
Creb3l1	ENSMUSG00000027230	0	0.157499	0	0.684608
Lpin3	ENSMUSG00000027412	0	0	0	1.25244
Ctnnd1	ENSMUSG00000034101	0	0	0	0.891755
Pdzk1ip1	ENSMUSG00000028716	0	0	0	1.03735
Hoxb4	ENSMUSG00000038692	0	0	0	0.739063
Dnah7a	ENSMUSG00000096141	0	0	0	1.34619
Col1a2	ENSMUSG00000029661	0	0	0	2.33969
Ckmt1	ENSMUSG00000000308	0	0	0	2.07828
Sp6	ENSMUSG00000038560	0	0	0	1.29284
Tspoap1	ENSMUSG00000034156	0	0	0	1.09443
Zfp14	ENSMUSG00000053985	0	0	0	0.976851
Tmem132a	ENSMUSG00000024736	0	0	0	0.650304
Pdk4	ENSMUSG00000019577	0	0	0	1.26286
Grin2d	ENSMUSG00000002771	0	0	0	0.779359
Gpr179	ENSMUSG00000070337	0	0	0	0.796919
5730559C18Rik	ENSMUSG00000041605	0	0	0	1.28353
Klhdc8b	ENSMUSG00000032609	0	0	0	0.666304
Cst6	ENSMUSG00000024846	0	0	0	1.28942
Atcay	ENSMUSG00000034958	0	0	0	0.713309
Necab3	ENSMUSG00000027489	0	0	0	1.03055
Gucy2e	ENSMUSG00000020890	0	0	0	1.10193
C2	ENSMUSG00000024371	0	0	0	0.756903
Nid2	ENSMUSG00000021806	0	0	0	0.692821
Kcnh4	ENSMUSG00000035355	0	0	0	1.67654
Tmem132e	ENSMUSG00000020701	0	0	0	1.85892
Il17rb	ENSMUSG00000015966	0	0	0	0.780801
Colec12	ENSMUSG00000036103	0	0	0	0.746325
Col1a1	ENSMUSG00000001506	0	0	0	1.72084
Gpr83	ENSMUSG00000031932	0	0	0	0.812894
Fgf16	ENSMUSG00000031230	0	0	0	2.31354
Egfl6	ENSMUSG00000000402	0	0	0	1.18394
Zfp870	ENSMUSG00000095325	0	0	1.23597	0.694136
Samd14	ENSMUSG00000047181	0	0	0	0.587634
Pkd2	ENSMUSG00000034462	0	0	0	0.977996
Kiss1r	ENSMUSG00000035773	0	0	0	0.797968
Kdelr3	ENSMUSG00000010830	0	0	0	0.757817
Hspa1l	ENSMUSG00000007033	0	0	0	0.88393
Eln	ENSMUSG00000029675	0	0	0	2.23305
Gm17322	ENSMUSG00000097604	0	0	0	1.90302
Dapk2	ENSMUSG00000032380	0	0	0	1.33341
Ctsw	ENSMUSG00000024910	0	0	0	0.98444
Col6a2	ENSMUSG00000020241	0	0	0	1.81807
C1qtnf6	ENSMUSG00000022440	0	0	0	1.01611
Ifit1bl1	ENSMUSG00000079339	0	0	0	0.640689
Pglyrp1	ENSMUSG00000030413	0	0	0	0.895355
Ltbp3	ENSMUSG00000024940	0	0	0	1.2988
Lrp3	ENSMUSG00000001802	0	0	0	1.68172
Adgra3	ENSMUSG00000029090	0	0	0	1.22563
Glis2	ENSMUSG00000014303	0	0	0	0.604892
Ccrl2	ENSMUSG00000043953	0	0	0	0.688026
Plekhh2	ENSMUSG00000040852	0	0	0	0.895484
Pdzrn3	ENSMUSG00000035357	0	0	0	1.31087
Plxnb1	ENSMUSG00000053646	0	0	0	0.661546
Olfml3	ENSMUSG00000027848	0	0	0	1.53761
Fam19a3	ENSMUSG00000055865	0	0	0	0.956521
Des	ENSMUSG00000026208	0	0	0	1.71229
Lzts2	ENSMUSG00000035342	0	0	0	0.620033
Kndc1	ENSMUSG00000066129	0	0	0	1.30667
Prss41	ENSMUSG00000024114	0	0	0	0.924942
Ifi211	ENSMUSG00000026536	0	0	0	1.07444
Ube2l6	ENSMUSG00000027078	0	0	0	0.752892
Tctex1d2	ENSMUSG00000014075	0	0	0	0.718155
Tead3	ENSMUSG00000002249	0	0	0	1.55026
Pabpc1l	ENSMUSG00000054582	0	0	0	0.668089
Mrc2	ENSMUSG00000020695	0	0	0	1.8893
Gpx7	ENSMUSG00000028597	0	0	0	0.800757
Epha1	ENSMUSG00000029859	0	0	0	1.02417
Ccdc38	ENSMUSG00000036168	0	0	0	1.32944
Scarf2	ENSMUSG00000012017	0	0	0	1.92669
Tmem91	ENSMUSG00000061702	0	0	0	0.997823
Nipal4	ENSMUSG00000020411	0	0	0	1.97162
Mlkl	ENSMUSG00000012519	0	0	0	1.06004
Ajuba	ENSMUSG00000022178	0	0	0	0.599061
Slc2a13	ENSMUSG00000036298	0	0	0	3.25735
Shtn1	ENSMUSG00000041362	0	0	0	1.06475
Loxl1	ENSMUSG00000032334	0	0	0	2.13167
Gprasp2	ENSMUSG00000072966	0	0	0	0.999216
Edn3	ENSMUSG00000027524	0	0	0	3.98021
Tnfrsf11a	ENSMUSG00000026321	0	0	0	0.756916
Icam5	ENSMUSG00000032174	0	0	0	0.62539
Fam171b	ENSMUSG00000048388	0	0	0	0.70285
Bcl2l14	ENSMUSG00000030200	0	0	0	1.12567
Slc26a4	ENSMUSG00000020651	0	0	0	1.7528
Lgalsl	ENSMUSG00000042363	0	0	0	1.27037
Tmem231	ENSMUSG00000031951	0	0	0	1.17647
Rab27b	ENSMUSG00000024511	0	0	0	1.34531
Hyal2	ENSMUSG00000010047	0	0	0	0.876257
Ttc30a1	ENSMUSG00000075271	0	0	0	1.12799
Phlda3	ENSMUSG00000041801	0	0	0	1.56545
Hspg2	ENSMUSG00000028763	0	0	0	1.59381
Ccdc184	ENSMUSG00000029875	0	0	0	0.762724
Map1a	ENSMUSG00000027254	0	0	0	0.949075
Ly6g5b	ENSMUSG00000043807	0	0	0	0.812997
Lima1	ENSMUSG00000023022	0	0	0	1.20942
Pdzd4	ENSMUSG00000002006	0	0	0	0.789329
Gm4841	ENSMUSG00000068606	0	0	0	0.624909
Asphd2	ENSMUSG00000029348	0	0	0	1.66317
Wisp1	ENSMUSG00000005124	0	0	0	1.37157
Tceal3	ENSMUSG00000044550	0	0	0	1.15785
Sptbn2	ENSMUSG00000067889	0	0	0	1.09147
Lmtk3	ENSMUSG00000062044	0	0	0	0.610636
Aldh5a1	ENSMUSG00000035936	0	0	0	0.980452
Ntrk1	ENSMUSG00000028072	0	0	0	0.945462
Pkdcc	ENSMUSG00000024247	0	0	0	3.43489
Fah	ENSMUSG00000030630	0	0	0	0.765609
Vsig10	ENSMUSG00000066894	0	0	0	0.774689
Rtkn	ENSMUSG00000034930	0	0	0	0.803352
Pfn2	ENSMUSG00000027805	0	0	0	0.783044
Igfbp6	ENSMUSG00000023046	0	0	0	2.68712
Fam83h	ENSMUSG00000046761	0	0	0	1.06221
Gm4673	ENSMUSG00000097750	0	0	0	1.11717
Cyp2u1	ENSMUSG00000027983	0	0	0	0.826337
Zcchc18	ENSMUSG00000031428	0	0	0	0.585634
Kctd14	ENSMUSG00000051727	0	0	0	0.938063
Col12a1	ENSMUSG00000032332	0	0	0	4.88287
AI661453	ENSMUSG00000034382	0	0	0	1.63032
Gspt2	ENSMUSG00000071723	0	0	0	0.964532
Zdhhc15	ENSMUSG00000033906	0	0	0	0.797059
Plat	ENSMUSG00000031538	0	0	0	0.910339
Gm9754	ENSMUSG00000029360	0	0	0	0.984637
Fam171a1	ENSMUSG00000050530	0	0	0	1.48366
Fads6	ENSMUSG00000044788	0	0	0	0.626163
Gna14	ENSMUSG00000024697	0	0	0	0.97581
Tfcp2l1	ENSMUSG00000026380	0	0	0	0.649351
Rasgrf2	ENSMUSG00000021708	0	0	0	0.691596
Arl6	ENSMUSG00000022722	0	0	0	0.877002
Slc6a8	ENSMUSG00000019558	0	0	0	0.735225
Ripk4	ENSMUSG00000005251	0	0	0	1.22301
Sema6d	ENSMUSG00000027200	0	0	0	1.87314
Syn1	ENSMUSG00000037217	0	0	0	1.16853
Rec8	ENSMUSG00000002324	0	0	0	0.847861
Myl6b	ENSMUSG00000039824	0	0	0	0.602882
Gstt3	ENSMUSG00000001665	0	0	0	0.856504
Cntln	ENSMUSG00000038070	0	0	0	0.646245
Arap3	ENSMUSG00000024451	0	0	0	1.08512
Penk	ENSMUSG00000045573	0	0	0	1.32039
Spon1	ENSMUSG00000038156	0	0	0	1.08973
Fbxo41	ENSMUSG00000047013	0	0	0	0.820749
Camk2n1	ENSMUSG00000046447	0	0	0	0.757744
Ston1	ENSMUSG00000033855	0	0	0	0.58884
Nkg7	ENSMUSG00000004612	0	0	0	1.04672
Cd160	ENSMUSG00000038304	0	0	0	0.949047
Abat	ENSMUSG00000057880	0	0	0	1.1114
Magee2	ENSMUSG00000031224	0	0	0	2.38859
Kcnd1	ENSMUSG00000009731	0	0	0	1.01621
Ffar4	ENSMUSG00000054200	0	0	0	1.36733
Slc7a10	ENSMUSG00000030495	0	0	0	2.26434
Gpr176	ENSMUSG00000040133	0	0	0	1.64697
Arhgef5	ENSMUSG00000033542	0	0	0	1.00255
Rhbdf1	ENSMUSG00000020282	0	0	0	1.13645
Pdgfrb	ENSMUSG00000024620	0	0	0	1.19072
Jup	ENSMUSG00000001552	0	0	0	1.7458
Dsp	ENSMUSG00000054889	0	0	0	0.82
Scin	ENSMUSG00000002565	0	0	0	1.80175
Prdm5	ENSMUSG00000029913	0	0	0	0.603879
Kif19a	ENSMUSG00000010021	0	0	0	1.5439
Atp6v0e2	ENSMUSG00000039347	0	0	0	1.64735
Edn1	ENSMUSG00000021367	0	0	0	1.33374
Ogdhl	ENSMUSG00000021913	0	0	0	0.904227
Il33	ENSMUSG00000024810	0	0	0	2.08261
Pcnx2	ENSMUSG00000060212	0	0	0	2.25873
Mkrn2os	ENSMUSG00000068011	0	0	0	3.54533
Rassf6	ENSMUSG00000029370	0	0	0	1.9575
Rph3a	ENSMUSG00000029608	0	0	0	3.0342
Sh3bgrl	ENSMUSG00000031246	0	0	0	0.609237
Nphp1	ENSMUSG00000027378	0	0	0	0.923945
9230102O04Rik	ENSMUSG00000079602	0	0	0	0.848475
Scg2	ENSMUSG00000050711	0	0	0	0.757534
Bcam	ENSMUSG00000002980	0	0	0	0.631648
Lrrk2	ENSMUSG00000036273	0	0	0	2.22434
Enpp5	ENSMUSG00000023960	0	0	0	0.904789
Tgfa	ENSMUSG00000029999	0	0	0	1.37802
Tbc1d19	ENSMUSG00000039178	0	0	0	0.616662
Hmgn3	ENSMUSG00000066456	0	0	0	0.871271
2010107G23Rik	ENSMUSG00000020083	0	0	0	0.721371
Cyp4f16	ENSMUSG00000048440	0	0	0	0.779109
Aifm2	ENSMUSG00000020085	0	0	0	0.592678
Hopx	ENSMUSG00000059325	0	0	0	0.660639
Zfp536	ENSMUSG00000043456	0	0	0	1.25672
Prox1	ENSMUSG00000010175	0	0	0	1.38958
Ppic	ENSMUSG00000024538	0	0	0	0.617497
Rgs8	ENSMUSG00000042671	0	0	0	2.35138
Map2	ENSMUSG00000015222	0	0	0	1.77905
Zfp503	ENSMUSG00000039081	0	0	0	2.29297
Gucy1b3	ENSMUSG00000028005	0	0	0	1.60074
Tinagl1	ENSMUSG00000028776	0	0	0	0.833001
B3galt1	ENSMUSG00000034780	0	0	0	1.89351
Smim10l2a	ENSMUSG00000054850	0	0	0	1.42869
Mmp2	ENSMUSG00000031740	0	0	0	1.54783
Enpp2	ENSMUSG00000022425	0	0	0	1.62972
Dgki	ENSMUSG00000038665	0	0	0	1.76303
Tubg2	ENSMUSG00000045007	0	0	0	0.715399
Gm20531	ENSMUSG00000092482	0	0	0	0.65695
Hgfac	ENSMUSG00000029102	0	0	0	1.04745
Ldoc1l	ENSMUSG00000055745	0	0	0	0.648787
Pcyt1b	ENSMUSG00000035246	0	0	0	0.8051
D430019H16Rik	ENSMUSG00000094910	0	0	0	0.877414
Prss30	ENSMUSG00000024124	0	0	0	1.41588
Pon3	ENSMUSG00000029759	0	0	0	0.816794
Pnkd	ENSMUSG00000026179	0	0	0	1.05514
Arrdc4	ENSMUSG00000042659	0	0	0	0.678397
Zfp93	ENSMUSG00000055305	0	0	0	0.724638
Tmbim1	ENSMUSG00000006301	0	0	0	0.698086
D630039A03Rik	ENSMUSG00000052117	0	0	0	0.65698
Ces2c	ENSMUSG00000061825	0	0	0	1.24315
Lgi3	ENSMUSG00000033595	0	0	0	1.92314
Mid2	ENSMUSG00000000266	0	0	0	0.790993
Fut10	ENSMUSG00000046152	0	0	0	1.37733
Tceal8	ENSMUSG00000051579	0	0	0	0.814089
9530036M11Rik	ENSMUSG00000087670	0	0	0	1.33343
1700029I15Rik	ENSMUSG00000044916	0	0	0	0.756596
Foxp3	ENSMUSG00000039521	0	0	0	0.659178

## Sheet: EAE_DOWNreg
Gene Symbol	ENSEMBL ID	ChIP-seq c-Maf Score	Motif c-Maf Score	-log10 (BETA score)	-log2 (FC RNA-seq)
Zfp799	ENSMUSG00000095253	0.822604	0.99237	0.907279	-0.678029
Maf	ENSMUSG00000055435	0.883725	0.87133	2.86455	-6.66089
Samd11	ENSMUSG00000096351	0.984081	0.996011	2.01077	-2.05332
Miat	ENSMUSG00000097767	0.973739	0.98257	0	-1.83048
Rnase4	ENSMUSG00000021876	0.91932	0.860524	0.615647	-2.7948
Zdhhc24	ENSMUSG00000006463	0.726819	0.98288	0	-0.60002
Hormad2	ENSMUSG00000020419	0.867922	0.435665	0	-1.53468
Rcor2	ENSMUSG00000024968	0.693431	0.493357	0.870955	-1.11552
Btbd19	ENSMUSG00000073771	0.694641	0.466709	2.31176	-0.783057
Slc15a3	ENSMUSG00000024737	0.905996	0.320861	2.04072	-0.803218
Mcur1	ENSMUSG00000021371	0.755306	0.47922	0	-0.604793
Rorc	ENSMUSG00000028150	0.694816	0.484449	2.22308	-1.46519
Grhl1	ENSMUSG00000020656	0.801146	0.304813	0	-0.798629
Ablim3	ENSMUSG00000032735	0.672296	0.637462	0	-0.867919
Tnfsf8	ENSMUSG00000028362	0.531496	0.467787	0.811071	-0.829838
Plekho1	ENSMUSG00000015745	0.775402	0.325083	0	-1.27905
Timp2	ENSMUSG00000017466	0.772897	0.323108	0	-1.18587
Fam20a	ENSMUSG00000020614	0.470237	0.399655	0	-0.843769
Arnt2	ENSMUSG00000015709	0.490966	0.491004	0	-5.68141
Plk3	ENSMUSG00000028680	0.385313	0.493996	1.5147	-1.18518
Srxn1	ENSMUSG00000032802	0.493164	0.495565	0.585361	-0.607019
Nfkb1	ENSMUSG00000028163	0.569959	0.263354	2.07962	-0.686515
1700012B07Rik	ENSMUSG00000020617	0.43613	0.489368	0	-0.995715
Usp2	ENSMUSG00000032010	0.513489	0.217833	0	-0.685013
Hlf	ENSMUSG00000003949	0.252485	0.626023	0.537003	-1.28997
Il23r	ENSMUSG00000049093	0.627566	0.217833	0	-1.11025
Ston2	ENSMUSG00000020961	0.523801	0.285657	0	-0.975585
Dhrs3	ENSMUSG00000066026	0.397032	0.407529	0.64474	-0.713464
Batf3	ENSMUSG00000026630	0.218065	0.438928	0.72262	-1.10399
Zeb2	ENSMUSG00000026872	0.5114	0.208907	0.864549	-0.650616
Smox	ENSMUSG00000027333	0.434116	0.344419	0	-1.3203
Podnl1	ENSMUSG00000012889	0.333178	0.333011	1.68846	-2.05818
2003-03-01	ENSMUSG00000032656	0.191103	0.320732	0.539403	-0.707106
Tspan5	ENSMUSG00000028152	0.410964	0.0895006	0	-0.705236
Anp32a	ENSMUSG00000032249	0.388262	0.137512	0	-1.11696
Espn	ENSMUSG00000028943	0.247651	0.122163	0	-0.637015
Il1r2	ENSMUSG00000026073	0.163936	0.217833	0	-0.956943
Cysltr1	ENSMUSG00000052821	0.947866	0	0.831208	-0.870398
Prr29	ENSMUSG00000009210	0.731776	0	0	-1.52879
Hpn	ENSMUSG00000001249	0.606076	0	1.84436	-1.68846
Il10	ENSMUSG00000016529	0.620342	0	2.20004	-1.24649
Ccdc15	ENSMUSG00000034303	0.796421	0	0.890084	-0.633845
C030034L19Rik	ENSMUSG00000097365	0.92633	0	1.04321	-1.5684
Npdc1	ENSMUSG00000015094	0.716671	0	0	-0.988316
Cnn3	ENSMUSG00000053931	0.93551	0	1.0237	-1.28552
Ccr1	ENSMUSG00000025804	0.807286	0	0	-1.83041
Snx2	ENSMUSG00000034484	0.856224	0	0.431916	-0.707288
Tctex1d1	ENSMUSG00000028523	0.43522	0	1.14624	-0.731544
Ptprk	ENSMUSG00000019889	0.698863	0	0	-1.30015
Avpi1	ENSMUSG00000018821	0.770509	0	1.01601	-1.07488
Tdrkh	ENSMUSG00000041912	0.58312	0	0	-0.927908
Aqp3	ENSMUSG00000028435	0.632621	0	0	-1.05927
Nr1d1	ENSMUSG00000020889	0.784298	0	2.52404	-1.68745
Ermn	ENSMUSG00000026830	0.674181	0	0	-1.05104
Lmo4	ENSMUSG00000028266	0.519967	0	1.43783	-1.24466
Rmdn2	ENSMUSG00000036368	0.621311	0	0	-0.828639
Mgll	ENSMUSG00000033174	0.618227	0	0	-1.03095
Il17re	ENSMUSG00000043088	0.48716	0	1.84254	-1.17479
Ttc39c	ENSMUSG00000024424	0.497758	0	1.72746	-0.592603
Kcnmb4	ENSMUSG00000054934	0.554361	0	0	-0.797487
2210011C24Rik	ENSMUSG00000074217	0.55602	0	0	-1.41808
Cdc42ep2	ENSMUSG00000045664	0.327194	0	0	-2.66839
Epdr1	ENSMUSG00000002808	0.62836	0	0	-0.920591
Pqlc1	ENSMUSG00000034006	0.40311	0	0.806597	-0.74486
Igfbp7	ENSMUSG00000036256	0.457138	0	0	-1.08371
Azin2	ENSMUSG00000028789	0.288442	0	0	-0.857251
Slc22a4	ENSMUSG00000020334	0.258218	0	0	-1.11011
Ifngr2	ENSMUSG00000022965	0.219433	0	0	-0.80497
Inhba	ENSMUSG00000041324	0.356805	0	0	-1.83994
Angptl2	ENSMUSG00000004105	0.273182	0	0	-1.68652
Tspan2	ENSMUSG00000027858	0.295517	0	0	-1.13905
Gm16793	ENSMUSG00000097357	0.426776	0	1.18729	-1.22729
Ehd3	ENSMUSG00000024065	0.269063	0	0	-0.741775
Stx1a	ENSMUSG00000007207	0.17972	0	0	-0.744984
BB031773	ENSMUSG00000085041	0.292916	0	0	-1.00627
Ckb	ENSMUSG00000001270	0.19192	0	0	-0.879833
Mtss1	ENSMUSG00000022353	0.270457	0	1.25034	-0.632399
Vdr	ENSMUSG00000022479	0.300914	0	0	-2.40314
St6galnac3	ENSMUSG00000052544	0.0715521	0	0	-0.727603
Fam159b	ENSMUSG00000042655	0	0.616314	0	-0.58793
Itpka	ENSMUSG00000027296	0	0.45722	0	-2.54948
Zfp941	ENSMUSG00000060314	0	0.460454	0	-0.803397
Mmp25	ENSMUSG00000023903	0	0	0	-1.47337
Magi1	ENSMUSG00000045095	0	0	0	-1.2829
Adam8	ENSMUSG00000025473	0	0	0	-0.860469
St6galnac1	ENSMUSG00000009588	0	0	0	-1.29327
Ppp1r14c	ENSMUSG00000040653	0	0	0	-2.77742
Pxdc1	ENSMUSG00000021411	0	0	0	-1.80151
Mal	ENSMUSG00000027375	0	0	0	-1.82235
Cap2	ENSMUSG00000021373	0	0	0	-1.51133
Zfp971	ENSMUSG00000074519	0	0	0	-0.718484
Ggt5	ENSMUSG00000006344	0	0	0	-0.803727
Laptm4b	ENSMUSG00000022257	0	0	0	-1.23067
Acpp	ENSMUSG00000032561	0	0	0	-0.676228
Slc4a11	ENSMUSG00000074796	0	0	0	-1.19388
Dgkg	ENSMUSG00000022861	0	0	0	-1.79251
Gm527	ENSMUSG00000047227	0	0	0	-0.917
Ltb4r1	ENSMUSG00000046908	0	0	0	-1.05677
Spon2	ENSMUSG00000037379	0	0	0	-2.74605
Cyp4f16	ENSMUSG00000048440	0	0	0	-1.09174
5830411N06Rik	ENSMUSG00000054672	0	0	0	-1.93211
Acvr2a	ENSMUSG00000052155	0	0	0	-1.08443
Cited4	ENSMUSG00000070803	0	0	0	-1.19757
Ptges	ENSMUSG00000050737	0	0	0	-1.62374
Mmp9	ENSMUSG00000017737	0	0	0	-2.33941
Pkib	ENSMUSG00000019876	0	0	0	-0.856546
Chad	ENSMUSG00000039084	0	0	0	-1.20022
Il17a	ENSMUSG00000025929	0	0	0	-1.68482

## Sheet: EAE_NonDE
Gene Symbol	ENSEMBL ID	ChIP-seq c-Maf Score	Motif c-Maf Score	-log10 (BETA score)	-log2 (FC RNA-seq)
Ms4a6b	ENSMUSG00000024677	0.925498	0	0	0.112392
Cd4	ENSMUSG00000023274	0.481505	0	0	-0.11162
Mtrf1	ENSMUSG00000022022	0.833798	0	0	-0.196658
Il2	ENSMUSG00000027720	0.836645	0	0	0.660091
Slc16a6	ENSMUSG00000041920	0.967581	0	0	-0.399489
Ncapd3	ENSMUSG00000035024	0.758424	0	0	-0.110731
Tti2	ENSMUSG00000031577	0.984584	0	0	0.328199
Zfp169	ENSMUSG00000050954	0.974591	0	0	-0.0229201
Sar1b	ENSMUSG00000020386	0.847858	0	0	-0.0542289
A230050P20Rik	ENSMUSG00000038884	0.900883	0	0	0.339878
Trbv12-1	ENSMUSG00000095574	0.962274	0	0	0.249658
Gm38394	ENSMUSG00000094410	0.957162	0	0	-0.140573
Gm26532	ENSMUSG00000097296	0.794678	0	0	-0.721446
Spdl1	ENSMUSG00000069910	0.855101	0	0	0.00739707
Taco1	ENSMUSG00000001983	0.924781	0	0	0.0646702
Mir22hg	ENSMUSG00000085148	0.98106	0	0	-0.243474
Ankfy1	ENSMUSG00000020790	0.970447	0	0	0.172935
BC052040	ENSMUSG00000040282	0.939945	0	0	0.0558851
E2f4	ENSMUSG00000014859	0.993028	0	0	-0.130184
Bcl2l11	ENSMUSG00000027381	0.821876	0	0	0.251992
Ctla2b	ENSMUSG00000074874	0.871989	0	0	0.384258
Samhd1	ENSMUSG00000027639	0.775144	0	0	0.142661
Chchd5	ENSMUSG00000037938	0.972229	0	0	-0.00307143
Klf9	ENSMUSG00000033863	0.744907	0	0	0.156057
H2-T24	ENSMUSG00000053835	0.979278	0	0	0.15566
Hykk	ENSMUSG00000035878	0.8912	0	0	0.0777765
Tnfrsf13c	ENSMUSG00000068105	0.723875	0	0	0.72692
Hmg20a	ENSMUSG00000032329	0.932489	0	0	-0.103235
Hmox1	ENSMUSG00000005413	0.962003	0	0	-0.315155
Rps3	ENSMUSG00000030744	0.929274	0	0	-0.0215302
Dcun1d3	ENSMUSG00000048787	0.948253	0	0	0.191359
Pdxdc1	ENSMUSG00000022680	0.876985	0	0	0.0592674
Zwint	ENSMUSG00000019923	0.916221	0	0	0.00031349
Cpsf1	ENSMUSG00000034022	0.864591	0	0	-0.101145
Rnf168	ENSMUSG00000014074	0.967813	0	0	-0.13122
Hist2h2be	ENSMUSG00000068854	0.947556	0	0	0.255653
Prdx2	ENSMUSG00000005161	0.941746	0	0	-0.157657
Tmem106a	ENSMUSG00000034947	0.980246	0	0	-0.143557
Hist1h2bg	ENSMUSG00000058385	0.915485	0	0	-0.346049
Xpot	ENSMUSG00000034667	0.91994	0	0	0.0771551
Scd2	ENSMUSG00000025203	0.887585	0	0	0.39411
Nuf2	ENSMUSG00000026683	0.98412	0	0	0.0974537
Cxcl10	ENSMUSG00000034855	0.94651	0	0	-0.00681349
Dpep2	ENSMUSG00000053687	0.896351	0	0	-1.02383
Hfe	ENSMUSG00000006611	0.815904	0	0	-0.505469
Snhg5	ENSMUSG00000097195	0.883376	0	0	0.190447
6430562O15Rik	ENSMUSG00000097828	0.964831	0	0	0.501661
Fam43a	ENSMUSG00000046546	0.83649	0	0	1.11503
Gm20496	ENSMUSG00000092550	0.893253	0	0	-0.158982
H2-DMb2	ENSMUSG00000037548	0.984623	0	0	-0.16938
Gm12167	ENSMUSG00000085853	0.799404	0	0	-0.485321
Phf5a	ENSMUSG00000061360	0.964327	0	0	-0.0999524
Atp1a2	ENSMUSG00000007097	0.779224	0	0	0.730724
Klhl9	ENSMUSG00000070923	0.897281	0	0	0.259071
C2cd3	ENSMUSG00000047248	0.992137	0	0	0.0250637
Urm1	ENSMUSG00000069020	0.965644	0	0	0.281113
Trbv19	ENSMUSG00000076475	0.830428	0	0	-0.0570063
Mllt11	ENSMUSG00000053192	0.949841	0	0	-0.201356
Ypel3	ENSMUSG00000042675	0.87226	0	0	0.0700187
Slc36a3os	ENSMUSG00000085531	0.941746	0	0	0.26544
Kdm4d	ENSMUSG00000053914	0.931598	0	0	1.03681
Coasy	ENSMUSG00000001755	0.828453	0	0	-0.0528476
Nop53	ENSMUSG00000041560	0.788249	0	0	-0.0941325
Rps19	ENSMUSG00000040952	0.929177	0	0	-0.0800975
Vps33b	ENSMUSG00000030534	0.896351	0	0	-0.0997428
Alkbh2	ENSMUSG00000044339	0.915911	0	0	-0.166823
Idh2	ENSMUSG00000030541	0.960841	0	0	-0.0696741
Aptx	ENSMUSG00000028411	0.869974	0	0	-0.0960026
Pkd1l3	ENSMUSG00000048827	0.842397	0	0	-0.70559
Zfp952	ENSMUSG00000053390	0.929933	0	0	0.0581675
Zswim4	ENSMUSG00000035671	0.973236	0	0	-0.281731
Trim12a	ENSMUSG00000066258	0.90242	0	0	0.195228
Dnajc7	ENSMUSG00000014195	0.823095	0	0	-0.0231775
Cd53	ENSMUSG00000040747	0.943937	0	0	-0.0451627
Utf1	ENSMUSG00000047751	0.865908	0	0	0.0488169
Ube2e1	ENSMUSG00000021774	0.975482	0	0	0.0532042
5730455P16Rik	ENSMUSG00000057181	0.844682	0	0	-0.0489883
Cd3g	ENSMUSG00000002033	0.864474	0	0	-0.0389496
Pikfyve	ENSMUSG00000025949	0.989039	0	0	-0.0954757
Gimap4	ENSMUSG00000054435	0.753389	0	0	0.213791
Rack1	ENSMUSG00000020372	0.847858	0	0	-0.0904846
Carmil2	ENSMUSG00000050357	0.831513	0	0	-0.0942644
Arel1	ENSMUSG00000042350	0.916492	0	0	0.0917078
Zfat	ENSMUSG00000022335	0.99144	0	0	0.0941549
2700060E02Rik	ENSMUSG00000021807	0.971415	0	0	0.0762425
Snx32	ENSMUSG00000056185	0.940313	0	0	0.667257
Zc3h10	ENSMUSG00000039810	0.960222	0	0	-0.252468
L2hgdh	ENSMUSG00000020988	0.8692	0	0	-0.241113
Arl2bp	ENSMUSG00000031776	0.863855	0	0	-0.0460122
Trbv31	ENSMUSG00000076499	0.950358	0	0	0.078843
Sec13	ENSMUSG00000030298	0.758114	0	0	-0.139413
Vps29	ENSMUSG00000029462	0.998063	0	0	-0.133853
Dvl3	ENSMUSG00000003233	0.93276	0	0	-0.206572
Scrn3	ENSMUSG00000008226	0.980634	0	0	0.157391
Mad1l1	ENSMUSG00000029554	0.924781	0	0	-0.0685479
Spg11	ENSMUSG00000033396	0.904292	0	0	-0.0541229
Ech1	ENSMUSG00000053898	0.79309	0	0	-0.197967
Rdm1	ENSMUSG00000010362	0.977419	0	0	0.0942256
Sumf2	ENSMUSG00000025538	0.876985	0	0	-0.191547
Pxk	ENSMUSG00000033885	0.951061	0	0	-0.0890356
Scpep1	ENSMUSG00000000278	0.944109	0	0	-0.280256
Gm10392	ENSMUSG00000072673	0.858781	0	0	-0.378412
Saysd1	ENSMUSG00000045107	0.848749	0	0	0.0266936
Tufm	ENSMUSG00000073838	0.877953	0	0	-0.0313504
Idua	ENSMUSG00000033540	0.882059	0	0	0.242967
Naa20	ENSMUSG00000002728	0.853203	0	0	0.0967391
Tmem101	ENSMUSG00000020921	0.848749	0	0	-0.133605
2410004P03Rik	ENSMUSG00000071398	0.848517	0	0	-0.15067
Terf2	ENSMUSG00000031921	0.873383	0	0	-0.121694
Fbxo7	ENSMUSG00000001786	0.963243	0	0	-0.0617161
St3gal6	ENSMUSG00000022747	0.83192	0	0	0.126787
Rnaseh1	ENSMUSG00000020630	0.855566	0	0	-0.126357
Dapk3	ENSMUSG00000034974	0.970486	0	0	-0.0890951
Dusp2	ENSMUSG00000027368	0.925091	0	0	0.0591761
Mirt1	ENSMUSG00000097636	0.838795	0	0	0.136155
Selenow	ENSMUSG00000041571	0.901813	0	0	0.00899223
Pik3cg	ENSMUSG00000020573	0.926389	0	0	0.0212981
Med23	ENSMUSG00000019984	0.935859	0	0	-0.259179
Snrnp35	ENSMUSG00000029402	0.935471	0	0	0.0262053
Evi2	ENSMUSG00000070354	0.814703	0	0	0.0765765
Crebzf	ENSMUSG00000051451	0.874545	0	0	-0.139122
Ndufa5	ENSMUSG00000023089	0.934077	0	0	0.0642504
Lta	ENSMUSG00000024402	0.92389	0	0	-0.44066
Tap2	ENSMUSG00000024339	0.838575	0	0	-0.100474
Btbd6	ENSMUSG00000002803	0.847858	0	0	0.0767403
Rpl13	ENSMUSG00000000740	0.91719	0	0	0.0967668
Zfp146	ENSMUSG00000037029	0.931869	0	0	0.315663
Lipe	ENSMUSG00000003123	0.92176	0	0	0.366136
Sec62	ENSMUSG00000027706	0.846076	0	0	0.140764
Thap2	ENSMUSG00000020137	0.890851	0	0	0.217765
Psmb4	ENSMUSG00000005779	0.844682	0	0	-0.0276367
Stk38l	ENSMUSG00000001630	0.911786	0	0	0.0844394
Mfsd7b	ENSMUSG00000066595	0.984275	0	0	-0.342435
Casp1	ENSMUSG00000025888	0.94926	0	0	0.174289
Clec12a	ENSMUSG00000053063	0.684096	0	0	0.074677
Gimap9	ENSMUSG00000051124	0.734242	0	0	0.0536636
Rad23a	ENSMUSG00000003813	0.912193	0	0	-0.265155
Mkln1	ENSMUSG00000025609	0.912038	0	0	0.102735
Tubb5	ENSMUSG00000001525	0.996708	0	0	-0.0651967
Glo1	ENSMUSG00000024026	0.840344	0	0	-0.112016
Nme6	ENSMUSG00000032478	0.885158	0	0	-0.192715
Gcn1l1	ENSMUSG00000041638	0.790069	0	0	-0.0554417
Jtb	ENSMUSG00000027937	0.860059	0	0	-0.120836
Aup1	ENSMUSG00000068328	0.909056	0	0	-0.074264
Fam53c	ENSMUSG00000034300	0.878534	0	0	0.129692
Pex7	ENSMUSG00000020003	0.94314	0	0	0.126167
Gm17055	ENSMUSG00000090576	0.98807	0	0	-0.600265
Dennd6a	ENSMUSG00000040818	0.857619	0	0	0.0796274
Ubald2	ENSMUSG00000050628	0.905686	0	0	0.140873
Gstt2	ENSMUSG00000033318	0.781845	0	0	0.225738
Dusp11	ENSMUSG00000030002	0.946704	0	0	0.0688911
Pigt	ENSMUSG00000017721	0.906073	0	0	-0.419808
Galc	ENSMUSG00000021003	0.83935	0	0	0.311703
Rnasel	ENSMUSG00000066800	0.785983	0	0	-0.00503425
Nqo2	ENSMUSG00000046949	0.805291	0	0	-0.281563
Sf3a3	ENSMUSG00000028902	0.844682	0	0	-0.0334549
Dffb	ENSMUSG00000029027	0.853978	0	0	-0.00511514
Trim17	ENSMUSG00000036964	0.947556	0	0	-0.0825993
Nras	ENSMUSG00000027852	0.876404	0	0	-0.0393473
Trappc13	ENSMUSG00000021711	0.956271	0	0	0.252183
Pcgf2	ENSMUSG00000018537	0.744907	0	0	-0.00834484
Timm22	ENSMUSG00000020843	0.894337	0	0	-0.156456
Adat2	ENSMUSG00000019808	0.878379	0	0	-0.129167
Zc3h12d	ENSMUSG00000039981	0.775738	0	0	0.153685
Nop2	ENSMUSG00000038279	0.978116	0	0	0.0219503
Zfp143	ENSMUSG00000061079	0.978116	0	0	0.0629781
Tmem175	ENSMUSG00000013495	0.992951	0	0	-0.138439
Clint1	ENSMUSG00000006169	0.897281	0	0	-0.304684
Fgfbp3	ENSMUSG00000047632	0.91138	0	0	-0.492816
Zmym1	ENSMUSG00000043872	0.860872	0	0	0.0377423
Tbx6	ENSMUSG00000030699	0.585832	0	0	0.148074
Parp1	ENSMUSG00000026496	0.950306	0	0	-0.158385
Gpr18	ENSMUSG00000050350	0.846851	0	0	0.0428019
Becn1	ENSMUSG00000035086	0.695019	0	0	-0.161897
Hmgxb4	ENSMUSG00000034518	0.904679	0	0	-0.210174
Dnmt1	ENSMUSG00000004099	0.894415	0	0	0.0423116
4833420G17Rik	ENSMUSG00000062822	0.832636	0	0	0.0785678
Snu13	ENSMUSG00000063480	0.926524	0	0	0.0870908
Gm17080	ENSMUSG00000067389	0.750639	0	0	-0.254377
Tuba1a	ENSMUSG00000072235	0.924781	0	0	-0.20854
Trex1	ENSMUSG00000049734	0.839066	0	0	0.0487581
Ube2j2	ENSMUSG00000023286	0.848749	0	0	-0.221783
Il12rb1	ENSMUSG00000000791	0.951842	0	0	-0.136936
Mrps12	ENSMUSG00000045948	0.82303	0	0	-0.176794
Ints12	ENSMUSG00000028016	0.866915	0	0	-0.0816282
Cox20	ENSMUSG00000026500	0.892602	0	0	0.113067
Snx3	ENSMUSG00000019804	0.981486	0	0	-0.0692098
Ndufs6	ENSMUSG00000021606	0.971067	0	0	0.205141
Trim27	ENSMUSG00000021326	0.905144	0	0	0.0361059
Cr1l	ENSMUSG00000016481	0.799326	0	0	0.0668608
Coq8b	ENSMUSG00000003762	0.834302	0	0	-0.158743
Agk	ENSMUSG00000029916	0.878922	0	0	0.0233126
Vps51	ENSMUSG00000024797	0.843443	0	0	-0.0403544
Wdr89	ENSMUSG00000045690	0.892982	0	0	-0.00592226
Gm11714	ENSMUSG00000087113	0.842745	0	0	0.401144
P4htm	ENSMUSG00000006675	0.857619	0	0	0.238781
Tefm	ENSMUSG00000046909	0.90251	0	0	0.216806
Trim65	ENSMUSG00000054517	0.766713	0	0	-0.0608109
Fastk	ENSMUSG00000028959	0.820939	0	0	-0.149082
Phkb	ENSMUSG00000036879	0.855566	0	0	0.111008
Slc25a36	ENSMUSG00000032449	0.870168	0	0	0.0868126
Gca	ENSMUSG00000026893	0.80502	0	0	-0.0620595
Mir155hg	ENSMUSG00000097418	0.957433	0	0	0.128771
Amdhd2	ENSMUSG00000036820	0.934464	0	0	-0.0707438
Atxn7l2	ENSMUSG00000048997	0.939228	0	0	-0.216155
Iws1	ENSMUSG00000024384	0.943876	0	0	0.00807191
Cbx5	ENSMUSG00000009575	0.9165	0	0	0.00284574
Zfp655	ENSMUSG00000007812	0.87346	0	0	0.0132526
Trim21	ENSMUSG00000030966	0.798319	0	0	0.154908
Fmc1	ENSMUSG00000019689	0.874984	0	0	0.0911542
[truncated: 9,498 more rows]

## Sheet: EAE_UPreg
Gene Symbol	ENSEMBL ID	ChIP-seq c-Maf Score	Motif c-Maf Score	-log10 (BETA score)	-log2 (FC RNA-seq)
[truncated: 106 more rows]
