# Supplementary material for: c-Maf controls immune responses by regulating disease-specific gene networks and repressing IL-2 in CD4+ T cells
Source: Springer Nature journal article supplement (doi:10.1038/s41590-018-0083-5), 2018-04-13
Supplement: MOESM8 [file 41590_2018_83_MOESM8_ESM_Supp_T_6.xlsx]

## Sheet: Supplementar Table 6
Malaria: C2=5.5298, P < 0.06	Down-regulated genes	Non-differentially expressed genes	Up-regulated genes	Total genes		HDM allergy: C2=80.298, P < 2.2e-16	Down-regulated genes	Non-differentially expressed genes	Up-regulated genes	Total genes		EAE: C2=12.749, P < 1.704e-03	Down-regulated genes	Non-differentially expressed genes	Up-regulated genes	Total genes
ChIP-seq or motif match	923 (947.29)	6355 (6316.63)	905 (919.08)	8183		ChIP-seq or motif match	286 (266.96)	7850 (7785.05)	345 (428.99)	8481		ChIP-seq or motif match	82 (83.7)	7541 (7524.14)	67 (82.15)	7690
No ChIP-seq and no motif	252 (227.71)	1480 (1518.37)	235 (220.92)	1967		No ChIP-seq and no motif	60 (79.04)	2240 (2304.95)	211 (127.01)	2511		No ChIP-seq and no motif	26 (24.3)	2167 (2183.86)	39 (23.85)	2232
Total genes	1175	7835	1140	10150		Total genes	346	10090	556	10992		Total genes	108	9708	106	9922
	Supplementary Table 6: Combined c-Maf binding evidence for direct effects on differentially expressed genes. Counts table of binary classification of genes according to evidence of c-Maf binding via ChIP-seq or motif match (expected values in parenthesis). Enrichment of c-Maf binding was tested in the RNA-seq-defined differentially up- or down-regulated genes over the non-differentially expressed…
