# Supplementary material for: c-Maf controls immune responses by regulating disease-specific gene networks and repressing IL-2 in CD4+ T cells
Source: Springer Nature journal article supplement (doi:10.1038/s41590-018-0083-5), 2018-04-13
Supplement: MOESM9 [file 41590_2018_83_MOESM9_ESM_Supp_T_7.xlsx]

## Sheet: EAE_KOvWT
	Motif	average delta accessibility	average delta footprint depth	bagplot location	data point depth	distance to mean	p-value	q-value	Mahalanobis distance
1	Ahr	-0.050589	-0.0233566	outlier	1	0.0747839	0.0725891	0.857237	5.24588
2	Alx1	0.0203897	0.0189181	bag	44	0.00898758	0.983502	0.991246	0.0332711
3	Ar	0.0406763	-0.0186917	fence	5	0.0472885	0.445376	0.991246	1.61767
4	Arnt	-0.0548826	0.0168803	fence	11	0.0663153	0.419637	0.991246	1.73673
5	Atf1	-0.0506707	0.0176533	fence	14	0.0620899	0.472739	0.991246	1.49842
6	Atf2	-0.0459562	0.0256968	bag	22	0.0578254	0.576139	0.991246	1.10281
7	Atf3	-0.0487332	0.0244387	bag	19	0.0604441	0.539375	0.991246	1.23469
8	Batf	0.0571528	-0.00257579	bag	17	0.0503424	0.643807	0.991246	0.880712
9	Bhlhe40	-0.00414185	0.00612031	bag	28	0.019853	0.817498	0.991246	0.403014
10	Cdx4	0.0394746	0.02932	bag	20	0.0300904	0.731368	0.991246	0.625677
11	Cebpa	0.0385618	0.022069	bag	30	0.0273872	0.838645	0.991246	0.351935
12	Cebpb	0.0328731	0.0186889	bag	37	0.0214604	0.914629	0.991246	0.178474
13	Cebpd	-0.0243724	0.0177079	bag	28	0.0357942	0.777309	0.991246	0.503834
14	Cebpe	0.0103298	-0.00196187	bag	19	0.0204462	0.748367	0.991246	0.579722
15	Creb1	-0.0551729	0.0410702	fence	14	0.0703224	0.455084	0.991246	1.57455
16	Crx	0.0540187	0.0402805	fence	11	0.0478695	0.397943	0.991246	1.84289
17	Ctcf	-0.0647996	0.0447478	fence	12	0.0806214	0.354354	0.991246	2.07492
18	Dbp	0.0747166	0.00866211	fence	11	0.0640556	0.515644	0.991246	1.32468
19	E2f1	-0.0795772	0.0397841	fence	9	0.0934576	0.255373	0.991246	2.73006
20	E2f2	-0.103014	0.0747453	fence	3	0.127523	0.0542107	0.770996	5.82976
21	E2f3	-0.068008	0.0612758	fence	6	0.0902298	0.21593	0.991246	3.0656
22	E2f5	-0.0327233	0.100643	outlier	3	0.0932894	0.0185266	0.55417	7.9771
23	E2f6	-0.113033	0.0441267	fence	4	0.127067	0.0788381	0.857237	5.08072
24	Egr1	-0.111727	0.0500056	fence	5	0.127119	0.080366	0.857237	5.04233
25	Ehf	0.0680051	0.00909946	bag	15	0.0573593	0.590041	0.991246	1.05513
26	Elf1	0.0622146	0.00239894	bag	21	0.0532777	0.63921	0.991246	0.895046
27	Elk1	0.0636013	0.00262154	bag	17	0.0545365	0.626841	0.991246	0.934125
28	Elk4	0.0672892	0.00894772	bag	16	0.0566783	0.598296	0.991246	1.02734
29	Erg	0.0648317	0.00468796	bag	18	0.0551633	0.622028	0.991246	0.949539
30	Esr1	-0.017942	-0.0112	fence	5	0.041728	0.368664	0.991246	1.99574
31	Esr2	-0.00551426	0.00515944	bag	22	0.0215256	0.789992	0.991246	0.471465
32	Esrra	-0.000108744	0.0246209	bag	37	0.0130685	0.968493	0.991246	0.0640276
33	Esrrb	0.0125666	0.0124356	bag	52	0.00612932	0.977224	0.991246	0.0460793
34	Esrrg	0.0116583	0.0191195	bag	45	0.000707427	0.999645	0.999645	0.000710203
35	Ets1	0.0840166	-0.00513868	fence	2	0.0763402	0.397771	0.991246	1.84376
36	Etv4	0.074126	0.00239549	fence	8	0.0647358	0.520044	0.991246	1.30768
37	Fli1	0.029162	0.00831211	bag	46	0.0204421	0.921736	0.991246	0.162993
38	Fos	0.0432913	0.0150963	bag	37	0.0320538	0.841457	0.991246	0.345241
39	Fosl2	0.0420334	-0.0111542	fence	9	0.0425944	0.588222	0.991246	1.0613
40	Foxa1	0.0610452	0.00623274	bag	24	0.0511141	0.66512	0.991246	0.815575
41	Foxa2	0.0527492	0.0115933	bag	31	0.0419009	0.75472	0.991246	0.562818
42	Foxi1	0.0425605	0.0217393	bag	28	0.0313191	0.802504	0.991246	0.440037
43	Foxj3	0.0799895	0.0700715	outlier	2	0.0858301	0.0255879	0.55417	7.33127
44	Foxo3	0.0627368	0.0497786	fence	5	0.0601263	0.201061	0.991246	3.20829
45	Foxp2	0.0705768	-0.0125951	fence	3	0.0668159	0.437007	0.991246	1.65561
46	Gabpa	0.0419796	0.00600356	bag	38	0.0330047	0.834457	0.991246	0.361948
47	Gata1	0.0579308	-0.00940295	fence	7	0.0542209	0.553769	0.991246	1.18202
48	Gata2	0.0650522	0.00392959	bag	16	0.0555703	0.617503	0.991246	0.964143
49	Gata4	0.0642836	-0.023337	fence	1	0.067393	0.324598	0.991246	2.25034
50	Gli2	0.0139671	-0.012656	fence	8	0.0312162	0.528122	0.991246	1.27685
51	Gli3	-0.0135927	-0.00960781	fence	7	0.0375884	0.429704	0.991246	1.68932
52	Hif1a	-0.0669538	0.00736079	fence	5	0.0791492	0.225344	0.991246	2.98025
53	Hnf1a	0.0653638	0.106737	outlier	1	0.103461	0.000789374	0.03368	14.2885
54	Hnf1b	0.0855396	0.038741	fence	3	0.0768512	0.176543	0.991246	3.46839
55	Hnf4a	0.00483981	0.0153287	bag	46	0.00727992	0.97976	0.991246	0.0408958
56	Hsf1	0.017378	0.0442058	fence	14	0.0264319	0.606871	0.991246	0.998877
57	Hsf2	0.0230521	0.0348825	bag	20	0.0201318	0.770225	0.991246	0.522144
58	Jun	0.0568629	-0.00827149	fence	11	0.0527251	0.575704	0.991246	1.10432
59	Junb	0.0560251	-0.00890792	fence	10	0.0523346	0.571453	0.991246	1.11915
60	Jund	0.0552304	0.00213569	bag	27	0.046757	0.70158	0.991246	0.708841
61	Maf	0.0141016	-0.010781	fence	11	0.0293598	0.570183	0.991246	1.1236
62	Maf_crunch	0.0233237	-0.0237177	fence	3	0.0438226	0.33231	0.991246	2.20337
63	Mafk	0.0267534	-0.026642	fence	1	0.0476349	0.288803	0.991246	2.48402
64	Max	-0.0246823	0.0142187	bag	29	0.0363441	0.739288	0.991246	0.604136
65	Mbd2	-0.0699348	0.0499764	fence	10	0.0872421	0.287592	0.991246	2.49242
66	Mecom	0.082818	0.0214798	fence	7	0.071468	0.354455	0.991246	2.07435
67	Mef2a	0.0818805	0.0086242	fence	5	0.071149	0.437798	0.991246	1.652
68	Mef2c	0.0610763	-0.00600304	fence	9	0.0553585	0.577172	0.991246	1.09923
69	Meis2	0.0796731	0.00206299	fence	5	0.0701998	0.463199	0.991246	1.5392
70	Myc	0.000991076	0.0140805	bag	44	0.0113039	0.954984	0.991246	0.0921223
71	Mycn	-0.0205854	0.018494	bag	31	0.0319995	0.822826	0.991246	0.390021
72	Nanog	0.0547963	0.000996341	bag	24	0.0467637	0.696314	0.991246	0.723909
73	Nfatc1	-0.125103	0.147011	outlier	1	0.187519	4.26468e-05	0.00272939	20.1251
74	Nfatc2	-0.0879464	0.166195	outlier	1	0.178044	2.83829e-06	0.000363301	25.5446
75	Nfatc3	-0.0247738	0.0499291	fence	12	0.0479598	0.539905	0.991246	1.23272
76	Nfe2	0.0320858	-0.000398284	bag	25	0.0279784	0.803988	0.991246	0.436342
77	Nfkb1	-0.0219918	0.0519343	fence	10	0.0472946	0.509868	0.991246	1.34721
78	Nfyb	0.0350727	0.015754	bag	43	0.0238124	0.909837	0.991246	0.188979
79	Nfyc	0.0254655	0.0165743	bag	48	0.0141768	0.967599	0.991246	0.0658752
80	Nr2c2	-0.0283306	0.0119563	bag	23	0.0402725	0.670434	0.991246	0.79966
81	Nr2f1	0.0352995	0.00493811	bag	38	0.0274452	0.864159	0.991246	0.291996
82	Nr2f2	0.0147454	0.025029	bag	34	0.00736944	0.96326	0.991246	0.0748646
83	Nr5a1	0.00842588	0.0042032	bag	31	0.0145622	0.859486	0.991246	0.302842
84	Nr5a2	0.00376356	0.00489272	bag	30	0.0155718	0.848445	0.991246	0.328699
85	Nr6a1	0.0335374	-0.000421167	bag	25	0.0290822	0.800048	0.991246	0.446167
86	Nrf1	-0.0813486	0.00578629	fence	3	0.0936238	0.126428	0.991246	4.13616
87	Olig2	0.00392313	0.00513267	bag	31	0.0152844	0.853483	0.991246	0.316858
88	Pbx1	0.0242933	0.00760303	bag	47	0.016842	0.928627	0.991246	0.148097
89	Pbx3	0.0358728	0.0130346	bag	49	0.0250523	0.906356	0.991246	0.196646
90	Pou2f1	0.0105806	0.0620512	fence	7	0.0436036	0.277045	0.991246	2.56715
91	Pou2f2	0.0257176	0.0431915	fence	12	0.0285737	0.57643	0.991246	1.1018
92	Pou5f1	0.0337211	0.000641726	bag	27	0.0285471	0.815813	0.991246	0.407139
93	Pparg	-0.0118738	0.00330881	bag	18	0.0277803	0.70131	0.991246	0.709611
94	Prdm1	0.0393696	0.0341221	bag	17	0.0320461	0.647687	0.991246	0.868695
95	Rest	-0.0347661	-0.00272091	fence	8	0.050804	0.37681	0.991246	1.95203
96	Rfx3	0.00489148	0.0121814	bag	48	0.0090503	0.955089	0.991246	0.0919009
97	Rora	-0.107595	-0.00211084	outlier	1	0.120773	0.0259767	0.55417	7.30111
98	Runx1	0.105088	-0.00167651	fence	1	0.0958125	0.236789	0.991246	2.88117
99	Runx2	0.0880448	0.0123533	fence	3	0.0768734	0.360833	0.991246	2.03868
100	Runx3	0.0537921	0.0177994	bag	22	0.0423831	0.715059	0.991246	0.67078
101	Smarcc1	0.0449389	-0.0149654	fence	7	0.0473379	0.510717	0.991246	1.34388
102	Sox2	0.0362233	-0.00333647	bag	20	0.0330211	0.744836	0.991246	0.589181
103	Sox9	0.0573574	0.00617704	bag	27	0.0475558	0.702608	0.991246	0.705911
104	Sp1	-0.124359	0.0379206	fence	2	0.137161	0.0468416	0.749466	6.12197
105	Sp3	-0.130305	0.043729	fence	1	0.143954	0.0369179	0.675069	6.59812
106	Spi1	0.0425508	0.011078	bag	40	0.0319989	0.852172	0.991246	0.319933
107	Spib	0.0646409	0.0230706	fence	13	0.0534266	0.537254	0.991246	1.24257
108	Srebf1	-0.0165987	0.00523676	bag	19	0.030975	0.691719	0.991246	0.737152
109	Srebf2	-0.0857539	0.0135665	fence	4	0.0972908	0.142887	0.991246	3.8914
110	Srf	0.00859685	-0.0280484	outlier	1	0.0465892	0.221255	0.991246	3.01688
111	Sry	0.0984043	0.0247746	fence	1	0.0872195	0.198057	0.991246	3.2384
112	Stat1	0.0351876	0.0596849	fence	6	0.0475925	0.216724	0.991246	3.05826
113	Stat2	0.0570381	0.0463955	fence	7	0.0534995	0.280143	0.991246	2.54491
114	Stat3	0.0113734	0.0333498	bag	24	0.0148943	0.86003	0.991246	0.301575
115	Stat4	0.0441574	0.0254969	bag	22	0.033492	0.740435	0.991246	0.601034
116	Stat5a	0.049928	0.0212262	bag	24	0.0386135	0.728324	0.991246	0.634018
117	Tal1	0.0751814	-0.000721116	fence	5	0.0665885	0.498676	0.991246	1.3916
118	Tcf3	-0.0269011	0.0106019	bag	21	0.0391117	0.668129	0.991246	0.806549
119	Tcf4	0.0260235	0.011049	bag	55	0.0163797	0.952343	0.991246	0.0976609
120	Tcf7l2	0.0872815	0.0270411	fence	3	0.0763517	0.266051	0.991246	2.64814
121	Tfap2a	-0.0674499	0.0329619	fence	13	0.080187	0.360303	0.991246	2.04162
122	Tfap2b	-0.076171	0.0361963	fence	10	0.0893637	0.284203	0.991246	2.51613
123	Tfap2c	-0.0536361	0.0289455	bag	18	0.0658905	0.497635	0.991246	1.39578
124	Usf1	-0.00804626	0.00701118	bag	27	0.022576	0.801319	0.991246	0.442992
125	Usf2	-0.0041157	0.0117988	bag	39	0.0168963	0.901161	0.991246	0.208142
126	Yy1	0.0185804	-0.0100175	fence	12	0.029361	0.602687	0.991246	1.01271
127	Zbtb33	-0.00253981	0.028913	bag	31	0.0174375	0.930382	0.991246	0.14432
128	Zic1	-0.0574054	0.0244752	bag	15	0.0690822	0.442057	0.991246	1.63263

## Sheet: HDM_KOvWT
	name	deltahyp	deltafd	category	hdepth	udist	pvalue	qvalue	mahalanobisDist
1	Ahr	0.0242494	0.0209121	fence	10	0.0212776	0.369937	0.949359	1.98885
2	Alx1	0.0365103	0.000583764	bag	35	0.0186377	0.851945	0.973651	0.320467
3	Ar	-0.0140209	-0.000232907	bag	16	0.0319047	0.61297	0.949359	0.978879
4	Arnt	0.0282539	0.0158264	fence	12	0.0184183	0.520156	0.949359	1.30725
5	Atf1	0.0921965	-0.0144734	fence	6	0.0758394	0.0990888	0.777803	4.62348
6	Atf2	0.0892699	-0.0109738	fence	6	0.0723313	0.121814	0.777803	4.21052
7	Atf3	0.0806932	-0.00937552	fence	8	0.0636096	0.196062	0.949359	3.25865
8	Batf	0.0691799	-0.0141537	fence	10	0.0533898	0.303496	0.949359	2.38478
9	Bhlhe40	0.033744	0.04018	outlier	2	0.0426319	0.0199946	0.708815	7.82458
10	Cdx4	0.00953108	0.00479911	bag	42	0.00933322	0.953898	0.997719	0.094398
11	Cebpa	-0.007304	0.00273393	bag	31	0.0252659	0.765064	0.949359	0.535592
12	Cebpb	0.00629905	-0.00771775	bag	26	0.0142598	0.759523	0.949359	0.550129
13	Cebpd	-0.0123043	0.00692901	bag	23	0.0308309	0.682181	0.949359	0.764921
14	Cebpe	0.00552928	0.0229354	fence	12	0.0255082	0.380076	0.949359	1.93477
15	Creb1	0.105771	-0.0204854	outlier	1	0.0903945	0.0361519	0.708815	6.64005
16	Crx	-0.00423362	-0.00990838	fence	13	0.0244822	0.539302	0.949359	1.23496
17	Ctcf	0.0342224	0.00967477	bag	18	0.0186932	0.671581	0.949359	0.796242
18	Dbp	0.00862579	0.0345439	fence	6	0.0351687	0.0979524	0.777803	4.64655
19	E2f1	0.0408496	-0.0167457	fence	14	0.0287967	0.53026	0.949359	1.26877
20	E2f2	0.0525419	-0.0138748	bag	18	0.0375745	0.506306	0.949359	1.36123
21	E2f3	0.0430929	-0.0235989	fence	3	0.0349607	0.312973	0.949359	2.32328
22	E2f5	0.0251273	-0.024236	fence	4	0.0258859	0.289029	0.949359	2.48246
23	E2f6	0.0501913	-0.0155418	bag	19	0.0361311	0.493974	0.949359	1.41055
24	Egr1	0.0542256	-0.0161838	bag	17	0.0400456	0.439929	0.949359	1.64228
25	Ehf	0.0287003	-0.00335683	bag	39	0.0115323	0.941645	0.997719	0.120253
26	Elf1	0.0485844	-0.00487525	bag	25	0.0311982	0.676504	0.949359	0.781635
27	Elk1	0.0590043	-0.00280622	fence	14	0.0412735	0.489033	0.949359	1.43065
28	Elk4	0.0598589	-0.00112253	fence	12	0.0420221	0.461271	0.949359	1.54754
29	Erg	0.0573175	-0.000213193	bag	15	0.0394535	0.496867	0.949359	1.39887
30	Esr1	-0.0204746	-0.00322315	fence	10	0.0385386	0.445791	0.949359	1.61581
31	Esr2	-0.041059	-0.00246659	fence	1	0.059012	0.17468	0.949359	3.4896
32	Esrra	-0.029985	0.00566594	fence	8	0.0481237	0.384542	0.949359	1.91141
33	Esrrb	-0.0408698	0.00518228	fence	2	0.0589199	0.231162	0.949359	2.92928
34	Esrrg	-0.0127572	0.00961072	bag	17	0.0319242	0.651591	0.949359	0.856677
35	Ets1	0.0436294	-6.27974e-05	bag	27	0.0257656	0.743573	0.949359	0.592578
36	Etv4	0.0237626	-0.00684679	bag	38	0.00950435	0.898013	0.997719	0.215142
37	Fli1	0.0508338	-0.0092966	bag	23	0.0344185	0.606093	0.949359	1.00144
38	Fos	0.0807636	-0.0139412	fence	8	0.064553	0.185031	0.949359	3.37447
39	Fosl2	0.0650785	-0.00978966	fence	11	0.0483384	0.389594	0.949359	1.8853
40	Foxa1	-0.00817656	0.0223392	fence	10	0.0339206	0.381463	0.949359	1.92748
41	Foxa2	0.00333974	0.0199004	bag	16	0.0241501	0.487513	0.949359	1.43687
42	Foxi1	0.11002	-0.0130194	outlier	2	0.0931498	0.0300532	0.708815	7.00957
43	Foxj3	0.0118352	-0.00210126	bag	50	0.00661933	0.957433	0.997719	0.0869982
44	Foxo3	0.00584599	-0.00740073	bag	27	0.0144517	0.764311	0.949359	0.537562
45	Foxp2	0.00380063	0.00771706	bag	33	0.0157637	0.873524	0.980799	0.270439
46	Gabpa	0.0556869	-0.00603484	bag	18	0.0383941	0.553209	0.949359	1.18404
47	Gata1	0.00561717	0.0362634	fence	4	0.0376986	0.0795608	0.777803	5.06247
48	Gata2	0.00863326	0.0326052	fence	7	0.0333001	0.127608	0.777803	4.11758
49	Gata4	0.00611035	0.0389184	outlier	3	0.0400711	0.0527951	0.708815	5.88267
50	Gli2	-0.015475	0.0210424	fence	7	0.0391081	0.37891	0.949359	1.94092
51	Gli3	-0.00323317	-0.00698887	bag	20	0.0224329	0.646696	0.949359	0.871758
52	Hif1a	0.0379547	0.00951756	fence	15	0.0219679	0.621916	0.949359	0.949902
53	Hnf1a	0.0292763	0.0490614	outlier	1	0.0497728	0.00410083	0.524907	10.9931
54	Hnf1b	0.0142445	0.0124949	bag	22	0.0124239	0.753435	0.949359	0.566225
55	Hnf4a	-0.0161445	0.00442121	bag	16	0.0342297	0.617858	0.949359	0.962993
56	Hsf1	-0.00604021	0.00611676	bag	33	0.0245382	0.783734	0.949359	0.487371
57	Hsf2	-0.0148502	0.00410655	bag	18	0.0329089	0.639824	0.949359	0.893124
58	Jun	0.0663898	-0.0183553	fence	9	0.0520931	0.28264	0.949359	2.52716
59	Junb	0.0606426	-0.0176226	fence	12	0.046495	0.348544	0.949359	2.10798
60	Jund	0.0647995	-0.0221368	fence	4	0.0521504	0.23739	0.949359	2.8761
61	Maf	-0.0231436	-0.0133791	fence	4	0.0433371	0.206665	0.949359	3.15332
62	Maf_crunch	-0.029164	-0.0173551	outlier	2	0.0503515	0.102898	0.777803	4.54803
63	Mafk	-0.0164267	-0.0212744	outlier	2	0.0406876	0.126064	0.777803	4.14193
64	Max	0.0191625	0.0116585	bag	23	0.011121	0.760421	0.949359	0.547767
65	Mbd2	0.0288981	-0.032499	outlier	1	0.0348989	0.112194	0.777803	4.37505
66	Mecom	-0.00585503	0.0205088	fence	13	0.0309656	0.446167	0.949359	1.61412
67	Mef2a	0.0246282	0.00466897	bag	34	0.00787983	0.928104	0.997719	0.149223
68	Mef2c	0.0135168	0.00475328	bag	41	0.0060099	0.96654	0.997719	0.0680646
69	Meis2	0.000529117	-0.00277783	bag	36	0.0176718	0.816767	0.953565	0.404802
70	Myc	-0.0013853	0.00732682	bag	34	0.0203949	0.831713	0.959093	0.368535
71	Mycn	0.0175865	0.00185512	bag	51	0.0012751	0.996862	0.998401	0.00628641
72	Nanog	-0.0064041	0.0192692	fence	14	0.0306175	0.482646	0.949359	1.45694
73	Nfatc1	-0.0246139	0.0288805	fence	2	0.0510312	0.169341	0.949359	3.55168
74	Nfatc2	-0.0259954	0.0400609	outlier	1	0.0589965	0.0441057	0.708815	6.24233
75	Nfatc3	-0.00885699	0.0112178	bag	21	0.0287567	0.678492	0.949359	0.775764
76	Nfe2	0.0216507	-0.00400144	bag	44	0.00596341	0.959625	0.997719	0.0824251
77	Nfkb1	0.0266597	0.00808299	bag	27	0.0115334	0.819287	0.953565	0.398643
78	Nfyb	0.116142	-0.0171522	outlier	1	0.0998617	0.0182476	0.708815	8.00744
79	Nfyc	0.096394	-0.0161903	fence	4	0.080299	0.0744974	0.777803	5.19398
80	Nr2c2	-0.000824873	0.00244301	bag	44	0.0187869	0.863765	0.978424	0.29291
81	Nr2f1	-0.0141888	0.00904857	fence	15	0.0331527	0.636351	0.949359	0.904009
82	Nr2f2	-0.0210643	0.00479671	fence	12	0.0391611	0.53149	0.949359	1.26414
83	Nr5a1	-0.0325163	0.00582321	fence	6	0.0506576	0.346248	0.949359	2.1212
84	Nr5a2	-0.0316114	0.00180444	fence	7	0.0494984	0.33405	0.949359	2.19293
85	Nr6a1	-0.0406172	-9.88082e-05	fence	3	0.0584942	0.199915	0.949359	3.21973
86	Nrf1	0.0441859	0.0363657	outlier	2	0.0443923	0.0247339	0.708815	7.39916
87	Olig2	-0.00704613	-0.00576252	bag	21	0.0257213	0.619453	0.949359	0.957838
88	Pbx1	0.0241707	-0.0312	outlier	2	0.03243	0.125536	0.777803	4.15033
89	Pbx3	0.104193	-0.0144264	fence	3	0.0876208	0.0457856	0.708815	6.16757
90	Pou2f1	0.0421481	0.00455087	bag	23	0.0245929	0.691737	0.949359	0.737098
91	Pou2f2	0.0407579	0.0028816	bag	28	0.0229974	0.750329	0.949359	0.574487
92	Pou5f1	-0.00163708	0.0238718	fence	10	0.0303582	0.350461	0.949359	2.09701
93	Pparg	-0.00223913	-0.00151704	bag	34	0.0202242	0.79865	0.953565	0.449665
94	Prdm1	-0.00672579	0.00273759	bag	32	0.0246901	0.774708	0.949359	0.510537
95	Rest	-0.0134301	0.000277011	bag	17	0.0313045	0.631219	0.949359	0.920204
96	Rfx3	0.0431349	0.000168533	bag	28	0.0252661	0.74968	0.949359	0.576219
97	Rora	-0.0086384	0.0090277	bag	28	0.0278146	0.71751	0.949359	0.663937
98	Runx1	0.0175817	0.00525631	bag	37	0.00465288	0.955255	0.997719	0.0915533
99	Runx2	0.0162631	0.000360558	bag	53	0.00162916	0.998401	0.998401	0.00320084
100	Runx3	0.00932279	-0.00693245	bag	33	0.0114029	0.81947	0.953565	0.398194
101	Smarcc1	0.038949	-0.0160101	fence	15	0.0268426	0.563615	0.949359	1.14677
102	Sox2	-0.0150954	0.0224472	fence	5	0.039543	0.345782	0.949359	2.12389
103	Sox9	-0.0185309	-0.00456009	fence	11	0.0367692	0.452144	0.949359	1.58751
104	Sp1	0.0569958	-0.0174698	fence	13	0.0430998	0.386208	0.949359	1.90276
105	Sp3	0.0572234	-0.0180901	fence	10	0.0435691	0.371468	0.949359	1.98058
106	Spi1	0.0115137	-0.0100631	bag	21	0.012426	0.733791	0.949359	0.619062
107	Spib	0.0157785	0.000390456	bag	54	0.00210585	0.997565	0.998401	0.00487672
108	Srebf1	0.00379798	-0.00588217	bag	30	0.0155009	0.784574	0.949359	0.485228
109	Srebf2	0.0309107	-0.0144091	bag	17	0.0198908	0.645183	0.949359	0.876442
110	Srf	0.0208429	-0.0062261	bag	40	0.00745581	0.912206	0.997719	0.18378
111	Sry	-0.00628312	0.00987539	bag	26	0.0258709	0.73435	0.949359	0.617538
112	Stat1	0.0129335	0.0116856	bag	24	0.0121247	0.786188	0.949359	0.481119
113	Stat2	-0.00846178	0.0014804	bag	27	0.0263487	0.735454	0.949359	0.614535
114	Stat3	-0.00724651	-0.00205263	bag	24	0.0252601	0.704071	0.949359	0.701753
115	Stat4	-0.00713583	-0.00757213	bag	16	0.0263137	0.566685	0.949359	1.1359
116	Stat5a	-0.0133985	-0.00661199	fence	14	0.0320949	0.490266	0.949359	1.42561
117	Tal1	0.00513754	0.01251	bag	22	0.0174279	0.754414	0.949359	0.563629
118	Tcf3	-0.00186511	-0.00500355	bag	26	0.0205212	0.725528	0.949359	0.64171
119	Tcf4	-0.0378446	-0.0182604	outlier	1	0.0588269	0.0553762	0.708815	5.78721
120	Tcf7l2	-0.0415046	0.00432501	fence	1	0.0594932	0.219726	0.949359	3.03075
121	Tfap2a	0.00552915	-0.019993	fence	8	0.0240198	0.315094	0.949359	2.30977
122	Tfap2b	0.0124097	-0.020116	fence	9	0.0214363	0.361729	0.949359	2.03372
123	Tfap2c	0.00309078	-0.0205021	fence	6	0.0257746	0.281057	0.949359	2.5384
124	Usf1	0.0381321	0.02155	fence	6	0.0291346	0.242878	0.949359	2.83039
125	Usf2	0.0451829	0.0255452	outlier	4	0.0369795	0.118302	0.777803	4.26902
126	Yy1	0.0152236	0.00219752	bag	49	0.00308698	0.994091	0.998401	0.0118533
127	Zbtb33	0.023526	0.00569082	bag	31	0.00759929	0.914549	0.997719	0.178648
128	Zic1	0.0184413	-0.0245195	fence	3	0.0251385	0.257604	0.949359	2.71267

## Sheet: MAL_KOvWT
	name	deltahyp	deltafd	category	hdepth	udist	pvalue	qvalue	mahalanobisDist
1	Ahr	-0.00146217	-0.0157816	fence	4	0.0353388	0.394626	0.985112	1.85963
2	Alx1	0.0187754	0.0694852	outlier	4	0.0574041	0.0445247	0.438397	6.22342
3	Ar	-0.0171312	0.00456926	bag	18	0.0381329	0.714926	0.985112	0.671153
4	Arnt	-0.0106852	0.00111901	bag	21	0.032827	0.715175	0.985112	0.670456
5	Atf1	0.0506818	0.0165821	bag	21	0.0307594	0.821776	0.985112	0.392575
6	Atf2	0.0560199	0.0223988	fence	15	0.0372224	0.684149	0.985112	0.759159
7	Atf3	0.0511494	0.0165103	bag	20	0.0312119	0.818447	0.985112	0.400693
8	Batf	0.240268	-0.007353	outlier	1	0.220876	0.000572549	0.0284663	14.9308
9	Bhlhe40	-0.0341151	0.0615724	outlier	3	0.0735062	0.100346	0.642214	4.59826
10	Cdx4	0.0058643	0.0074625	bag	50	0.0151154	0.935307	0.985112	0.13376
11	Cebpa	0.00307324	0.0320764	fence	15	0.0263462	0.69604	0.985112	0.724695
12	Cebpb	0.0205423	-0.0150771	fence	7	0.0271787	0.496611	0.985112	1.3999
13	Cebpd	-0.0543262	0.0364905	outlier	4	0.078464	0.322885	0.985112	2.26092
14	Cebpe	-0.000517541	0.025675	bag	19	0.0248113	0.825117	0.985112	0.384459
15	Creb1	0.0606851	0.0244024	fence	13	0.0422646	0.603434	0.985112	1.01024
16	Crx	-0.0203026	0.0213866	fence	14	0.041603	0.756082	0.985112	0.55921
17	Ctcf	0.00820992	0.0164384	bag	38	0.0127985	0.968793	0.985112	0.0634081
18	Dbp	0.02117	0.0191514	bag	37	0.00711109	0.952577	0.985112	0.0971688
19	E2f1	0.0150502	-0.00581689	bag	18	0.0186564	0.721155	0.985112	0.653803
20	E2f2	0.0221628	0.0199113	bag	34	0.00804191	0.940477	0.985112	0.122735
21	E2f3	0.0318166	0.00190716	bag	32	0.0154164	0.906422	0.985112	0.196501
22	E2f5	0.0290824	0.0228602	bag	28	0.0139205	0.868769	0.985112	0.281356
23	E2f6	0.0229835	0.00599973	bag	45	0.00668443	0.967142	0.985112	0.0668201
24	Egr1	0.0325419	-0.00466175	bag	19	0.0207854	0.776802	0.985112	0.505139
25	Ehf	0.0374605	0.00725798	bag	31	0.017878	0.946543	0.985112	0.109878
26	Elf1	0.0548876	0.00480473	fence	16	0.0353968	0.819603	0.985112	0.397871
27	Elk1	0.0590113	-0.00329256	fence	10	0.0417051	0.699168	0.985112	0.715728
28	Elk4	0.064997	0.00737527	fence	11	0.0449951	0.734462	0.985112	0.617234
29	Erg	0.0603006	0.0133398	fence	12	0.0400692	0.761001	0.985112	0.546242
30	Esr1	-0.00400144	-0.00396625	fence	16	0.029091	0.660355	0.985112	0.829954
31	Esr2	-0.0217301	0.00683322	fence	14	0.0423098	0.70025	0.985112	0.712635
32	Esrra	-0.00446002	0.00505427	bag	34	0.0256955	0.835349	0.985112	0.359811
33	Esrrb	-0.0147453	0.00612727	bag	22	0.035502	0.760595	0.985112	0.547308
34	Esrrg	0.0038616	0.00619198	bag	43	0.0174214	0.909032	0.985112	0.19075
35	Ets1	0.0526845	0.000523031	fence	14	0.0344381	0.795888	0.985112	0.456594
36	Etv4	0.0385458	-0.00229939	bag	20	0.0232821	0.817233	0.985112	0.403662
37	Fli1	0.0516071	0.00538461	bag	19	0.0320675	0.848925	0.985112	0.327568
38	Fos	0.0536055	-0.00726346	fence	9	0.038568	0.65976	0.985112	0.831758
39	Fosl2	0.192648	-0.0278138	outlier	1	0.176958	0.00627183	0.100349	10.1434
40	Foxa1	-0.00934214	0.00208753	bag	24	0.0312407	0.744965	0.985112	0.588837
41	Foxa2	-0.00372077	0.00973879	bag	37	0.0240874	0.895874	0.985112	0.21991
42	Foxi1	0.0454536	0.00139597	bag	21	0.0273819	0.850725	0.985112	0.323333
43	Foxj3	0.00115945	0.0246443	bag	22	0.0228437	0.848948	0.985112	0.327516
44	Foxo3	0.00100287	0.0265036	bag	19	0.0240404	0.814497	0.985112	0.41037
45	Foxp2	-0.00108881	0.00942738	bag	41	0.0215062	0.912082	0.985112	0.184051
46	Gabpa	0.0577444	0.00726486	fence	14	0.0378043	0.804295	0.985112	0.435577
47	Gata1	-0.0472282	0.012002	fence	5	0.0674789	0.474358	0.985112	1.49158
48	Gata2	-0.0427492	0.0214709	fence	7	0.063693	0.537541	0.985112	1.2415
49	Gata4	-0.0371389	0.00115975	fence	7	0.058423	0.462591	0.985112	1.54182
50	Gli2	0.00837597	-0.00375828	bag	21	0.0198114	0.742679	0.985112	0.594983
51	Gli3	0.0176872	0.00417216	bag	43	0.00833198	0.937438	0.985112	0.12921
52	Hif1a	0.00138136	0.00314389	bag	34	0.0208869	0.846753	0.985112	0.332692
53	Hnf1a	0.0384434	0.0286137	fence	17	0.0245699	0.690802	0.985112	0.739805
54	Hnf1b	0.0418843	0.00977565	bag	28	0.0217581	0.930392	0.985112	0.144299
55	Hnf4a	-0.0223222	0.0029857	fence	13	0.0435375	0.638515	0.985112	0.89722
56	Hsf1	-0.00944244	0.00834178	bag	27	0.02993	0.836376	0.985112	0.357355
57	Hsf2	-0.0154349	0.0103835	bag	20	0.0357268	0.800431	0.985112	0.445211
58	Jun	0.223012	-0.0104276	outlier	2	0.204009	0.00176311	0.0539668	12.6814
59	Junb	0.21502	-0.0150294	outlier	2	0.19665	0.0027318	0.0557609	11.8056
60	Jund	0.220213	-0.00731202	outlier	2	0.200903	0.00210808	0.0539668	12.324
61	Maf	-0.00703756	-0.0372959	outlier	1	0.0564323	0.0676241	0.50917	5.38758
62	Maf_crunch	-0.00857653	-0.0281008	outlier	3	0.0494682	0.151107	0.92103	3.77954
63	Mafk	0.0193628	-0.0401092	outlier	1	0.0522167	0.0744565	0.529469	5.19508
64	Max	-0.00246142	0.0170714	bag	29	0.0232498	0.917164	0.985112	0.172938
65	Mbd2	0.0325957	0.000903806	bag	29	0.016666	0.888844	0.985112	0.235668
66	Mecom	-0.0372417	0.00484994	fence	8	0.0579477	0.512121	0.985112	1.33839
67	Mef2a	0.036964	0.0287033	bag	18	0.0235585	0.697719	0.985112	0.719877
68	Mef2c	0.0383099	0.0300479	fence	16	0.025461	0.656699	0.985112	0.841058
69	Meis2	0.0311002	-0.0142417	fence	9	0.0284885	0.535699	0.985112	1.24837
70	Myc	-0.00155713	0.0215452	bag	25	0.0237654	0.883785	0.985112	0.247084
71	Mycn	-0.00442511	0.0216485	bag	22	0.0264588	0.867968	0.985112	0.283201
72	Nanog	-0.000580537	0.0034001	bag	32	0.0225749	0.837697	0.985112	0.354197
73	Nfatc1	-0.144507	0.0859038	outlier	1	0.180533	0.000667178	0.0284663	14.6249
74	Nfatc2	-0.12327	0.108707	outlier	1	0.173006	6.70653e-05	0.00858436	19.2197
75	Nfatc3	-0.0435551	0.0458264	outlier	4	0.072171	0.262092	0.985112	2.67812
76	Nfe2	0.0873265	-0.0193863	outlier	5	0.0740983	0.278632	0.985112	2.55573
77	Nfkb1	0.055418	0.0691857	outlier	2	0.0670486	0.0253092	0.323958	7.35318
78	Nfyb	0.0474367	-0.0043839	fence	12	0.031793	0.745152	0.985112	0.588335
79	Nfyc	0.0427022	0.00165579	bag	24	0.024762	0.867899	0.985112	0.283361
80	Nr2c2	-0.00718188	-0.000918737	bag	19	0.030365	0.703609	0.985112	0.703065
81	Nr2f1	0.00792379	0.00687319	bag	52	0.0133892	0.938969	0.985112	0.125945
82	Nr2f2	0.002298	0.00687549	bag	43	0.0186974	0.908141	0.985112	0.19271
83	Nr5a1	-0.00799715	0.00662043	bag	30	0.0287744	0.828406	0.985112	0.376505
84	Nr5a2	-0.0131629	0.00205525	bag	18	0.0348907	0.710467	0.985112	0.683665
85	Nr6a1	-0.0226191	0.0310427	fence	11	0.0468683	0.614014	0.985112	0.975475
86	Nrf1	0.0190495	-0.00634941	fence	17	0.0184885	0.720594	0.985112	0.655359
87	Olig2	-0.00121646	-0.0115716	fence	9	0.0319559	0.494811	0.985112	1.40716
88	Pbx1	-0.0030873	0.00156953	bag	28	0.0256037	0.785971	0.985112	0.48167
89	Pbx3	0.043298	-0.00431328	fence	14	0.0282944	0.762484	0.985112	0.542347
90	Pou2f1	0.0268771	0.0294924	bag	19	0.0186119	0.728882	0.985112	0.632486
91	Pou2f2	0.037619	0.0151385	bag	33	0.0176322	0.934195	0.985112	0.136141
92	Pou5f1	0.00392843	0.0181804	bag	31	0.017418	0.94185	0.985112	0.119818
93	Pparg	-0.00476253	0.00467797	bag	31	0.0260911	0.827192	0.985112	0.379436
94	Prdm1	0.0450091	0.0385739	fence	13	0.036247	0.410756	0.985112	1.77951
95	Rest	-0.0157366	-0.00935167	fence	7	0.0418958	0.451699	0.985112	1.58948
96	Rfx3	0.0300421	0.0214256	bag	30	0.0135218	0.890892	0.985112	0.231063
97	Rora	-0.00123124	0.0116829	bag	39	0.021486	0.925598	0.985112	0.154631
98	Runx1	0.15165	0.0564491	outlier	1	0.138681	0.00304942	0.0557609	11.5856
99	Runx2	0.118479	0.0454178	outlier	2	0.103725	0.0387476	0.438397	6.50137
100	Runx3	0.0817787	0.0311496	fence	9	0.0644095	0.305673	0.985112	2.37048
101	Smarcc1	0.157582	-0.0179871	outlier	5	0.140589	0.0423287	0.438397	6.32458
102	Sox2	-0.0190481	0.00890344	fence	16	0.0394286	0.751276	0.985112	0.571963
103	Sox9	-0.0393878	-0.000489735	fence	4	0.0609528	0.417256	0.985112	1.74811
104	Sp1	0.0253141	0.00578296	bag	40	0.00809588	0.9646	0.985112	0.0720835
105	Sp3	0.0269391	0.00507233	bag	37	0.00970171	0.955681	0.985112	0.0906617
106	Spi1	0.0129743	0.00889217	bag	52	0.00795207	0.977416	0.985112	0.0456854
107	Spib	0.0320485	0.0274516	bag	21	0.0193613	0.755167	0.985112	0.561633
108	Srebf1	0.0124843	-0.00955724	fence	14	0.0230077	0.614406	0.985112	0.974198
109	Srebf2	0.0140332	0.00146157	bag	38	0.012322	0.881343	0.985112	0.252616
110	Srf	-0.000248018	0.022424	bag	24	0.0229517	0.878168	0.985112	0.259834
111	Sry	0.0205923	0.0745657	outlier	2	0.0624666	0.0244854	0.323958	7.41936
112	Stat1	0.048929	0.0426623	fence	10	0.0419106	0.30506	0.985112	2.3745
113	Stat2	0.0611326	0.0587614	outlier	5	0.0620372	0.0670926	0.50917	5.40336
114	Stat3	-0.0131205	0.0302249	fence	13	0.0379756	0.684055	0.985112	0.759433
115	Stat4	0.00819017	0.0160647	bag	40	0.0126955	0.970765	0.985112	0.0593424
116	Stat5a	-0.00471694	0.0295932	fence	15	0.0304859	0.733472	0.985112	0.619932
117	Tal1	-0.027612	-0.0103603	outlier	5	0.0528706	0.347527	0.985112	2.11383
118	Tcf3	-0.0124082	-0.00888156	fence	9	0.0388179	0.485763	0.985112	1.44407
119	Tcf4	-0.0449353	-0.00248815	outlier	3	0.0667984	0.34072	0.985112	2.15339
120	Tcf7l2	-0.0944742	-0.00692411	outlier	1	0.116291	0.0545595	0.49883	5.81693
121	Tfap2a	0.00356271	0.00695083	bag	46	0.0174643	0.916712	0.985112	0.173925
122	Tfap2b	0.00679017	0.00616692	bag	48	0.0147101	0.924821	0.985112	0.156311
123	Tfap2c	0.00204284	0.00457885	bag	38	0.0197001	0.874746	0.985112	0.267643
124	Usf1	-0.00560774	0.0633847	outlier	5	0.057435	0.0947623	0.638398	4.71277
125	Usf2	0.000272095	0.0678604	outlier	4	0.0592314	0.0603608	0.50917	5.61483
126	Yy1	0.0209574	-0.000941746	bag	30	0.0130609	0.852256	0.985112	0.319736
127	Zbtb33	0.0202634	0.00827734	bag	49	0.00382268	0.986227	0.986227	0.0277366
128	Zic1	0.0114536	-0.0154493	fence	5	0.0289197	0.45875	0.985112	1.5585
