# Supplementary material for: c-Maf controls immune responses by regulating disease-specific gene networks and repressing IL-2 in CD4+ T cells
Source: Springer Nature journal article supplement (doi:10.1038/s41590-018-0083-5), 2018-04-13
Supplement: MOESM10 [file 41590_2018_83_MOESM10_ESM_Supp_T_8.xlsx]

## Sheet: Suppplementary Table 8
Malaria					HDM allergy					EAE
Differentially expressed genes					Differentially expressed genes					Differentially expressed genes
Motif	Odds Ratio	P value	q value (BH correction)		Motif	Odds Ratio	P value	q value (BH correction)		Motif	Odds Ratio	P value	q value (BH correction)
Runx2	1.33	1.05e-09	2.53e-08		Mafk	1.5	2.18e-08	2.4e-07		Rora	2.08	1.21e-05	0.000108
Tal1	1.3	5.25e-06	1.84e-05		Maf	1.44	2.09e-07	1.15e-06		Maf	1.54	0.00205	0.00922
Nfatc1	1.26	6.77e-05	0.000148		Gata4	1.42	0.000126	0.000346		MafCrunch	1.5	0.00337	0.0101
Batf	1.26	2.28e-06	1.37e-05		Tcf4	1.33	2.04e-05	7.48e-05		Mafk	1.41	0.0145	0.0327
Tcf7l2	1.26	1.78e-06	1.37e-05		Pbx1	1.28	0.0161	0.0254		Nfatc2	1.32	0.0692	0.125
Jund	1.26	2.28e-06	1.37e-05		MafCrunch	1.28	0.000373	0.00082		Foxj3	1.26	0.0975	0.146
Sry	1.25	5.35e-06	1.84e-05		Nfatc2	1.25	0.00487	0.00893		Srf	1.16	0.262	0.337
Mafk	1.24	5.37e-06	1.84e-05		Bhlhe40	0.97	0.638	0.877		Ahr	0.93	0.69	0.776
Jun	1.24	1.11e-05	3.32e-05		Foxi1	0.92	0.877	1		E2f5	0.82	0.879	0.879
Cebpd	1.24	0.00107	0.00135		Creb1	0.76	0.999	1
Junb	1.23	1.51e-05	4.03e-05		Mbd2	0.68	1	1
Smarcc1	1.22	3.27e-05	7.85e-05
Nfatc3	1.2	0.000277	0.000474
Nfatc2	1.2	0.000714	0.00101
Usf2	1.19	0.000204	0.0004
MafCrunch	1.19	0.000217	0.0004
Fosl2	1.18	0.00035	0.00056
Maf	1.17	0.000605	0.000908
Tcf4	1.16	0.000918	0.00122
Nfe2	1.15	0.00248	0.00298
Bhlhe40	1.14	0.00668	0.00697
Usf1	1.14	0.0046	0.00502
Nfkb1	1.13	0.00412	0.00471
Stat2	1.06	0.102	0.102
	Supplementary Table 8: Transcription factors with altered activity are statistically enriched in differentially expressed genes. For each disease model, transcription factor motifs identified by BaGFoot as outliers from the multivariate distribution (by a factor bigger than 2) were tested for enrichment within the RNA-seq-defined differentially expressed versus the non-differentially expressed ge…
